# Supplementary material for: Shotgun Quantitative Proteomic Analysis of Proteins Responding to Drought Stress in Brassica rapa L. (Inbred Line “Chiifu”)
Source: Int J Genomics. 2016 Jun 21;2016:4235808. doi: 10.1155/2016/4235808 (PMC4932182; doi:10.1155/2016/4235808)
Supplement: Supplementary file 1 — Supplementary table 1. List of total 3,009 identified non-redundant proteins. Supplementary table 2. List of identified non-redundant proteins from each sample. Supplementary table 3. Relative expression amount of the 1,567 proteins among the treatments and replications. Supplementary table 4. Relative amount of 440 differentially expressed proteins. Supplementary table 5. Average of relative amount of proteins in each groups. Supplementary table 6. Enriched GO terms of proteins in each groups. [file 4235808.f1.zip]

Archive with 6 entries (6 files):
- sup.table S1.xlsx
- sup.table S2.xlsx
- sup.table S3.xlsx
- sup.table S4.xlsx
- sup.table S5.xlsx
- sup.table S6.docx
