# Supplementary material for: Shotgun Quantitative Proteomic Analysis of Proteins Responding to Drought Stress in Brassica rapa L. (Inbred Line “Chiifu”)
Source: Int J Genomics. 2016 Jun 21;2016:4235808. doi: 10.1155/2016/4235808 (PMC4932182; doi:10.1155/2016/4235808)
Supplement: Supplementary file 1 — Supplementary table 1. List of total 3,009 identified non-redundant proteins. Supplementary table 2. List of identified non-redundant proteins from each sample. Supplementary table 3. Relative expression amount of the 1,567 proteins among the treatments and replications. Supplementary table 4. Relative amount of 440 differentially expressed proteins. Supplementary table 5. Average of relative amount of proteins in each groups. Supplementary table 6. Enriched GO terms of proteins in each groups. [file 4235808.f1.zip › sup.table S1.xlsx]

## Sheet: Sheet2
	Supplementary table 1. List of total 3,009 identified non-redundant proteins and their spectral counts in each sample
		#AA: number of amino acid
Accession	Description	# AAs	0hr 1	0hr 2	0hr 3	24hr 1	24hr 2	24hr 3	48hr 1	48hr 2	48hr 3
Bra016644	heat shock protein 70B	650	0.1	0.1	0.1	0.1	0.1	0.1	60	56	59
Bra012203	ferredoxin-NADP(+)-oxidoreductase 2	367	0.1	0.1	0.1	65	72	66	0.1	0.1	0.1
Bra024101	H(+)-ATPase 2	905	40	47	43	0.1	0.1	0.1	0.1	0.1	0.1
Bra016481	ferredoxin-NADP(+)-oxidoreductase 2	364	49	57	43	0.1	0.1	0.1	67	60	60
Bra027756	P-loop containing nucleoside triphosphate hydrolases superfamily protein	831	0.1	0.1	0.1	0.1	0.1	0.1	14	10	11
Bra019953	acetyl Co-enzyme a carboxylase biotin carboxylase subunit	501	0.1	0.1	0.1	35	38	39	0.1	0.1	0.1
Bra017233	ENTH/VHS family protein	1323	0.1	0.1	0.1	0.1	0.1	0.1	24	22	25
Bra003256	dicarboxylate diiron protein, putative (Crd1)	409	0.1	0.1	0.1	0.1	0.1	0.1	10	9	10
Bra017018	Eukaryotic translation initiation factor 2 subunit 1	429	2	2	2	0.1	0.1	0.1	0.1	0.1	0.1
Bra006391	PHYTOENE SYNTHASE	414	2	2	2	0.1	0.1	0.1	0.1	0.1	0.1
Bra004054	UDP-Glycosyltransferase / trehalose-phosphatase family protein	863	0.1	0.1	0.1	0.1	0.1	0.1	2	2	2
Bra002840	LORELEI-LIKE-GPI-ANCHORED PROTEIN 1	77	0.1	0.1	0.1	0.1	0.1	0.1	2	2	2
Bra000035	vacuoleless1 (VCL1)	820	0.1	0.1	0.1	0.1	0.1	0.1	2	2	2
Bra014904	HISTIDINE TRIAD NUCLEOTIDE-BINDING 2	183	0.1	0.1	0.1	0.1	0.1	0.1	2	2	2
Bra000115	hydroxyproline-rich glycoprotein family protein	326	0.1	0.1	0.1	0.1	0.1	0.1	2	2	2
Bra011869	cold, circadian rhythm, and RNA binding 1	162	7	10	7	0.1	0.1	0.1	0.1	0.1	0.1
Bra028547	P-loop containing nucleoside triphosphate hydrolases superfamily protein	491	0.1	0.1	0.1	0.1	0.1	0.1	3	2	2
Bra019384	Uncharacterised protein family (UPF0041)	108	0.1	0.1	0.1	0.1	0.1	0.1	5	4	3
Bra015607	Serine protease inhibitor (SERPIN) family protein	392	0.1	0.1	0.1	0.1	0.1	0.1	3	3	2
Bra022867	ACT domain-containing small subunit of acetolactate synthase protein	467	0.1	0.1	0.1	4	3	3	0.1	0.1	0.1
Bra005640	ACT domain-containing small subunit of acetolactate synthase protein	444	4	3	3	0.1	0.1	0.1	0.1	0.1	0.1
Bra006067	Zincin-like metalloproteases family protein	695	0.1	0.1	0.1	0.1	0.1	0.1	10	15	10
Bra033604	Glucose-1-phosphate adenylyltransferase family protein	523	0.1	0.1	0.1	0.1	0.1	0.1	7	6	9
Bra013385	RNAse l inhibitor protein 2	581	8	7	5	0.1	0.1	0.1	0.1	0.1	0.1
Bra004323	Ribosomal protein PSRP-3/Ycf65	168	0.1	0.1	0.1	4	5	3	0.1	0.1	0.1
Bra003601	Protein kinase superfamily protein	1154	0.1	0.1	0.1	0.1	0.1	0.1	3	4	3
Bra000998	glucuronokinase G	360	2	2	2	0.1	0.1	0.1	3	2	3
Bra017684	subtilisin-like serine protease 2	767	0.1	0.1	0.1	0.1	0.1	0.1	4	5	3
Bra039315	signal recognition particle receptor protein, chloroplast (FTSY)	315	2	3	2	0.1	0.1	0.1	0.1	0.1	0.1
Bra022325	Eukaryotic aspartyl protease family protein	491	0.1	0.1	0.1	10	12	8	14	7	10
Bra009706	ribosomal protein S11-beta	159	0.1	0.1	0.1	5	4	6	0.1	0.1	0.1
Bra024809	ssDNA-binding transcriptional regulator	261	0.1	0.1	0.1	5	4	3	4	4	3
Bra012095	Protein phosphatase 2C family protein	409	3	3	2	0.1	0.1	0.1	0.1	0.1	0.1
Bra022262	unknown protein;	188	3	3	2	0.1	0.1	0.1	0.1	0.1	0.1
Bra024300	Phosphoglycerate mutase family protein	293	3	3	2	0.1	0.1	0.1	0.1	0.1	0.1
Bra024444	voltage dependent anion channel 2	276	0.1	0.1	0.1	0.1	0.1	0.1	7	11	10
Bra007284	dicarboxylate diiron protein, putative (Crd1)	837	21	28	17	16	17	27	0.1	0.1	0.1
Bra033545	Papain family cysteine protease	368	0.1	0.1	0.1	0.1	0.1	0.1	7	4	7
Bra039029	NADP-malic enzyme 1	582	0.1	0.1	0.1	0.1	0.1	0.1	14	6	7
Bra012557	|	601	0.1	0.1	0.1	2	3	3	0.1	0.1	0.1
Bra009660	lysm domain GPI-anchored protein 2 precursor	362	0.1	0.1	0.1	2	3	3	0.1	0.1	0.1
Bra028015	unknown protein;	138	2	3	3	4	3	4	0.1	0.1	0.1
Bra017819	cytochrome P450, family 81, subfamily D, polypeptide 8	498	0.1	0.1	0.1	0.1	0.1	0.1	16	8	6
Bra021273	B-cell receptor-associated 31-like	129	0.1	0.1	0.1	0.1	0.1	0.1	2	3	2
Bra021322	lipoxygenase 1	857	0.1	0.1	0.1	3	5	4	8	6	4
Bra006196	Auxin-responsive GH3 family protein	607	2	3	4	0.1	0.1	0.1	0.1	0.1	0.1
Bra004940	Remorin family protein	192	5	5	6	9	5	9	0.1	0.1	0.1
Bra031031	methylthioalkylmalate synthase-like 4	627	13	15	6	0.1	0.1	0.1	0.1	0.1	0.1
Bra000913	tolB protein-related	650	0.1	0.1	0.1	0.1	0.1	0.1	3	2	4
Bra009023	Glycosyl hydrolase family protein	792	0.1	0.1	0.1	5	4	4	4	2	4
Bra019044	early nodulin-like protein 2	713	0.1	0.1	0.1	3	3	4	4	7	5
Bra034219	two-pore channel 1	721	0.1	0.1	0.1	5	3	5	10	5	5
Bra028459	unknown protein;	2682	13	12	7	2	3	4	0.1	0.1	0.1
Bra026341	early nodulin-like protein 2	328	0.1	0.1	0.1	7	7	3	9	7	10
Bra019494	LOCATED IN: thylakoid, chloroplast thylakoid membrane, chloroplast, chloroplast envelope; EXPRESSED IN: 22 plant structures; EXPRESSED DURING: 13 growth stages; CONTAINS InterPro DOMAIN/s: Thylakoid soluble phosphoprotein TSP9 (InterPro:IPR021584); Has 37 Blast hits to 37 proteins in 10 species: Archae - 0; Bacteria - 0; Metazoa - 0; Fungi - 0; Plants - 37; Viruses - 0; Other Eukaryotes - 0 (sour…	103	2	5	4	11	15	8	0.1	0.1	0.1
Bra007758	unknown protein;	230	0.1	0.1	0.1	4	2	3	0.1	0.1	0.1
Bra029121	CAP160 protein	659	0.1	0.1	0.1	0.1	0.1	0.1	3	4	6
Bra025920	ketose-bisphosphate aldolase class-II family protein	1340	0.1	0.1	0.1	3	2	2	6	6	3
Bra007994	HISTIDINE BIOSYNTHESIS 6B	543	0.1	0.1	0.1	5	9	4	3	3	4
Bra016524	CONTAINS InterPro DOMAIN/s: Protein of unknown function DUF985 (InterPro:IPR009327), RmlC-like jelly roll fold (InterPro:IPR014710); Has 1465 Blast hits to 1465 proteins in 584 species: Archae - 10; Bacteria - 1038; Metazoa - 19; Fungi - 43; Plants - 51; Viruses - 0; Other Eukaryotes - 304 (source: NCBI BLink).	188	0.1	0.1	0.1	3	5	2	0.1	0.1	0.1
Bra034344	Calcium-dependent phosphotriesterase superfamily protein	370	0.1	0.1	0.1	0.1	0.1	0.1	12	4	10
Bra031219	copper ion binding;cobalt ion binding;zinc ion binding	242	4	3	6	3	6	5	0.1	0.1	0.1
Bra037580	Eukaryotic aspartyl protease family protein	499	5	2	3	0.1	0.1	0.1	0.1	0.1	0.1
Bra027049	ACC oxidase 2	320	0.1	0.1	0.1	4	4	2	10	4	5
Bra011830	myo-inositol-1-phosphate synthase 1	510	0.1	0.1	0.1	9	18	37	0.1	0.1	0.1
Bra013576	Peroxidase superfamily protein	331	0.1	0.1	0.1	3	8	8	0.1	0.1	0.1
Bra031205	Adenine nucleotide alpha hydrolases-like superfamily protein	188	0.1	0.1	0.1	4	5	2	3	4	4
Bra030768	Protein of unknown function, DUF538	169	0.1	0.1	0.1	5	7	2	9	9	8
Bra023707	Aluminium induced protein with YGL and LRDR motifs	168	0.1	0.1	0.1	5	6	7	7	4	2
Bra022440	Glycosyl hydrolase family protein	771	0.1	0.1	0.1	3	6	2	7	4	4
Bra003428	N-terminal nucleophile aminohydrolases (Ntn hydrolases) superfamily protein	223	6	3	2	0.1	0.1	0.1	0.1	0.1	0.1
Bra005153	Bifunctional inhibitor/lipid-transfer protein/seed storage 2S albumin superfamily protein	115	0.1	0.1	0.1	8	8	2	14	10	12
Bra017469	Thiolase family protein	432	0.1	0.1	0.1	0.1	0.1	0.1	16	3	7
Bra005012	delta1-pyrroline-5-carboxylate synthase 1	717	0.1	0.1	0.1	54	43	7	74	69	68
Bra023545	NAD(P)-binding Rossmann-fold superfamily protein	271	0.1	0.1	0.1	3	5	2	4	5	2
Bra025649	avirulence induced gene 2 like protein	141	0.1	0.1	0.1	7	2	3	6	5	4
Bra001931	glutathione-disulfide reductase	484	10	10	10	17	17	18	24	20	19
Bra019170	Double Clp-N motif protein	235	3	6	3	3	13	5	0.1	0.1	0.1
Bra016002	kunitz trypsin inhibitor 1	214	0.1	0.1	0.1	12	5	3	19	6	7
Bra016748	eukaryotic release factor 1-2	435	2	2	3	0.1	0.1	0.1	2	4	7
Bra002289	sucrose phosphate synthase 1F	1042	0.1	0.1	0.1	3	3	5	2	6	4
Bra008811	elongation factor family protein	674	8	7	5	2	4	11	0.1	0.1	0.1
Bra040854	PATELLIN 2	706	23	26	25	13	15	16	21	21	18
Bra014308	myrosinase-binding protein 2	733	8	7	7	16	13	16	33	21	24
Bra035074	vacuolar ATP synthase subunit A	623	66	73	70	110	105	93	135	109	103
Bra026349	protochlorophyllide oxidoreductase B	388	31	43	22	14	20	21	3	6	4
Bra011839	FK506-binding protein 16-2	200	7	7	6	4	4	3	5	6	5
Bra036764	annexin 1	317	21	21	14	60	53	34	113	74	98
Bra034402	annexin 1	325	27	28	21	66	65	42	117	75	102
Bra009483	glutamate synthase 1	1620	115	116	131	150	170	165	106	107	91
Bra016270	Aldolase superfamily protein	426	14	12	10	12	14	15	8	6	5
Bra011412	aminopeptidase M1	873	13	18	15	32	35	27	36	40	33
Bra011449	3-deoxy-d-arabino-heptulosonate 7-phosphate synthase	448	8	9	8	11	13	17	6	4	5
Bra024580	glutamate:glyoxylate aminotransferase	478	65	67	79	80	82	85	61	58	52
Bra027209	phospholipase D alpha 1	810	12	11	10	21	21	21	24	18	18
Bra030858	chaperonin 60 beta	689	118	126	115	135	167	152	115	107	98
Bra011919	chaperonin 60 beta	608	115	118	108	125	153	139	111	101	91
Bra024417	2-oxoglutarate dehydrogenase, E1 component	1014	8	7	6	11	11	12	17	18	15
Bra033657	Granulin repeat cysteine protease family protein	460	15	16	16	17	15	15	21	19	19
Bra040093	acyl-CoA oxidase 1	664	3	2	3	10	10	5	15	11	10
Bra016357	Phosphoglucomutase/phosphomannomutase family protein	583	22	23	21	29	33	25	45	34	41
Bra032750	S-adenosyl-L-homocysteine hydrolase	485	41	41	33	75	89	68	83	63	65
Bra016330	aldehyde dehydrogenase 2B7	537	9	9	12	19	17	18	25	19	21
Bra016353	glutamate:glyoxylate aminotransferase	478	71	74	84	82	81	90	63	63	56
Bra028922	TCP-1/cpn60 chaperonin family protein	591	70	65	66	65	77	75	59	57	46
Bra033287	RNA-binding (RRM/RBD/RNP motifs) family protein	192	6	7	5	4	7	5	3	2	3
Bra026004	SOUL heme-binding family protein	231	3	4	3	7	8	8	8	9	6
Bra005141	acetyl Co-enzyme a carboxylase carboxyltransferase alpha subunit	767	15	17	17	12	14	15	8	11	9
Bra007041	high cyclic electron flow 1	414	44	48	60	67	68	66	47	41	42
Bra037182	ferredoxin-NADP(+)-oxidoreductase 1	363	58	56	55	59	70	67	56	46	49
Bra028288	GroES-like zinc-binding alcohol dehydrogenase family protein	346	6	6	9	4	5	3	7	6	6
Bra003345	ketol-acid reductoisomerase	589	37	45	30	28	37	37	24	19	22
Bra017436	ARM repeat superfamily protein	734	2	3	2	4	4	4	2	2	2
Bra001470	phosphoglycerate kinase 1	484	140	150	174	215	211	211	168	150	137
Bra024568	Phosphoglucomutase/phosphomannomutase family protein	583	23	23	22	31	35	32	42	39	46
Bra011664	Ribosomal protein L2 family	258	17	21	14	14	13	14	25	21	24
Bra032118	Cytosol aminopeptidase family protein	521	42	38	43	84	78	71	76	54	59
Bra033478	Rubredoxin-like superfamily protein	186	6	8	7	6	7	6	6	4	3
Bra038734	heat shock protein 70	650	74	78	68	103	125	101	131	121	125
Bra004244	Zincin-like metalloproteases family protein	956	5	7	6	11	14	10	8	6	5
Bra006138	Nitrilase/cyanide hydratase and apolipoprotein N-acyltransferase family protein	364	5	5	6	5	7	5	10	8	8
Bra028181	Ribulose bisphosphate carboxylase (small chain) family protein	162	342	368	367	421	410	350	323	339	260
Bra007002	chloroplast RNA-binding protein 29	323	5	10	5	2	0.1	0.1	0.1	0.1	0.1
Bra002116	Cobalamin-independent synthase family protein	765	119	149	115	233	289	217	213	178	170
Bra027196	MAR binding filament-like protein 1	720	7	5	6	0.1	0.1	0.1	0.1	2	0.1
Bra002468	4-hydroxy-3-methylbut-2-enyl diphosphate synthase	694	27	30	23	24	22	32	11	16	9
Bra039342	phosphoglycerate kinase 1	480	156	165	187	224	219	219	183	166	152
Bra030945	phosphoenolpyruvate carboxylase 1	964	23	22	22	38	46	42	35	37	31
Bra028624	peroxisomal NAD-malate dehydrogenase 2	358	46	46	52	73	99	68	55	46	47
Bra038797	tripeptidyl peptidase ii	1315	0.1	0.1	3	0.1	0.1	0.1	11	12	9
Bra010189	UDP-Glycosyltransferase superfamily protein	732	12	16	12	7	13	18	0.1	2	0.1
Bra022964	Apoptosis inhibitory protein 5 (API5)	551	0.1	2	0.1	6	9	5	0.1	0.1	0.1
Bra038863	photosystem II subunit O-2	333	139	140	164	129	143	125	140	148	138
Bra037682	O-acetylserine (thiol) lyase B	389	54	48	57	77	85	70	56	44	52
Bra032110	aldehyde dehydrogenase 11A3	496	10	18	11	39	45	29	24	21	17
Bra039301	plasma membrane intrinsic protein 1B	280	18	20	20	15	13	17	21	15	17
Bra007085	tryptophan synthase alpha chain	311	10	10	4	16	13	14	5	2	2
Bra031790	aspartic proteinase A1	615	0.1	2	3	0.1	0.1	0.1	17	5	9
Bra034107	P-loop containing nucleoside triphosphate hydrolases superfamily protein	331	2	2	4	9	9	8	5	4	3
Bra035836	glutamate-1-semialdehyde-2,1-aminomutase	473	36	44	36	57	63	59	44	39	42
Bra037389	thylakoid rhodanese-like	458	18	16	21	17	17	19	15	10	13
Bra021863	NAD(P)-binding Rossmann-fold superfamily protein	321	0.1	0.1	2	0.1	0.1	0.1	7	4	5
Bra034800	Adenine nucleotide alpha hydrolases-like superfamily protein	200	2	2	0.1	0.1	0.1	0.1	6	6	5
Bra006965	Pyruvate kinase family protein	527	10	11	11	22	23	24	33	17	24
Bra011568	rotamase cyclophilin 5	171	15	14	14	23	23	23	26	28	22
Bra028406	Ribulose bisphosphate carboxylase (small chain) family protein	181	242	263	242	272	273	234	197	227	200
Bra010696	Ribosomal protein S25 family protein	108	8	10	9	10	7	11	5	6	4
Bra037714	Ribosomal L38e protein family	69	9	7	7	6	4	4	6	6	4
Bra040136	unknown protein;	443	7	4	3	0.1	0.1	2	0.1	0.1	0.1
Bra037536	presequence protease 1	1133	29	30	30	33	38	33	25	29	21
Bra029563	photosystem II subunit Q-2	226	56	65	67	94	103	65	47	42	53
Bra011329	ATPase, F0 complex, subunit B/B', bacterial/chloroplast	221	29	30	37	47	33	37	28	19	22
Bra010728	rotamase CYP 1	172	8	9	9	32	22	14	30	22	32
Bra024346	annexin 2	316	0.1	0.1	0.1	3	2	0.1	9	7	5
Bra004475	ADP-ribosylation factor A1E	181	23	24	23	47	57	39	54	44	32
Bra027521	HAD superfamily, subfamily IIIB acid phosphatase	272	5	3	5	2	0.1	0.1	14	8	8
Bra005677	ferretin 1	276	0.1	0.1	0.1	3	3	0.1	11	7	7
Bra039844	nitrite reductase 1	507	27	22	24	23	30	23	24	18	18
Bra009790	Transducin/WD40 repeat-like superfamily protein	1315	0.1	0.1	0.1	0.1	2	0.1	4	4	4
Bra001972	cold, circadian rhythm, and RNA binding 1	164	0.1	0.1	0.1	2	0.1	0.1	5	4	4
Bra018700	mitochondrial lipoamide dehydrogenase 1	507	20	24	20	30	25	28	43	32	34
Bra011422	lysine-ketoglutarate reductase/saccharopine dehydrogenase bifunctional enzyme	1046	0.1	0.1	0.1	5	0.1	0.1	22	14	8
Bra006429	Cobalamin-independent synthase family protein	765	114	144	109	219	284	202	208	176	175
Bra010280	Uncharacterised BCR, YbaB family COG0718	183	8	9	9	7	9	8	9	8	9
Bra007034	uracil phosphoribosyltransferase	291	0.1	0.1	0.1	3	6	3	2	0.1	0.1
Bra002904	SHV3-like 1	758	7	8	8	17	13	12	7	8	8
Bra037640	chloroplast chaperonin 10	139	13	12	13	13	13	12	9	11	10
Bra025749	dehydroascorbate reductase	213	8	5	7	21	25	13	33	16	18
Bra015314	Lactate/malate dehydrogenase family protein	332	32	41	34	61	63	51	61	51	53
Bra014002	S-adenosyl-L-homocysteine hydrolase	478	41	43	31	70	83	65	80	61	61
Bra028411	alpha/beta-Hydrolases superfamily protein	368	0.1	2	0.1	0.1	0.1	0.1	5	6	2
Bra006954	monodehydroascorbate reductase 1	434	15	19	19	39	50	31	38	25	32
Bra000460	glutathione S-transferase phi 8	215	23	28	27	43	47	34	54	39	46
Bra030906	aldehyde dehydrogenase 7B4	504	0.1	0.1	0.1	10	4	0.1	27	15	17
Bra003155	Ribosomal protein L36e family protein	112	0.1	2	2	0.1	0.1	0.1	3	3	4
Bra033349	Protein of unknown function, DUF538	166	0.1	2	0.1	0.1	0.1	0.1	3	4	3
Bra014179	RAB GTPase homolog G3E	210	7	7	6	7	8	7	13	11	8
Bra039747	thioredoxin-dependent peroxidase 1	162	6	5	5	15	18	9	15	11	10
Bra007885	SPFH/Band 7/PHB domain-containing membrane-associated protein family	285	0.1	4	2	5	8	5	0.1	0.1	0.1
Bra016382	UDP-glucosyl transferase 85A2	480	0.1	0.1	0.1	5	5	0.1	13	11	13
Bra001085	polyribonucleotide nucleotidyltransferase, putative	921	11	14	12	0.1	8	0.1	0.1	0.1	0.1
Bra019845	aconitase 3	991	17	18	17	29	25	25	38	32	24
Bra009397	peroxisomal NAD-malate dehydrogenase 2	358	32	38	46	61	73	58	47	42	38
Bra006164	Protein of unknown function (DUF3411)	378	8	7	9	0.1	0.1	0.1	0.1	5	0.1
Bra002485	aleurain-like protease	359	0.1	2	0.1	7	9	7	11	5	9
Bra014973	Nucleic acid-binding proteins superfamily	382	3	2	4	0.1	0.1	0.1	0.1	2	0.1
Bra025431	Ribulose bisphosphate carboxylase (small chain) family protein	181	122	124	120	144	144	119	127	125	100
Bra000097	histone H2A 11	134	3	4	3	4	3	4	3	2	2
Bra004055	hydroxypyruvate reductase	386	44	59	62	71	74	76	61	44	39
Bra004031	alpha-xylosidase 1	924	3	5	3	8	5	4	10	11	14
Bra020587	seryl-tRNA synthetase / serine--tRNA ligase	451	4	6	7	12	20	13	11	9	8
Bra027376	Subtilase family protein	776	3	4	5	11	10	11	8	7	11
Bra023165	myo-inositol monophosphatase like 1	370	3	5	5	8	10	11	3	5	3
Bra002710	xylose isomerase family protein	477	0.1	0.1	0.1	2	3	0.1	5	5	4
Bra016184	phosphoglucomutase, putative / glucose phosphomutase, putative	613	0.1	3	0.1	4	6	5	0.1	0.1	0.1
Bra040870	Senescence/dehydration-associated protein-related	454	0.1	0.1	0.1	10	3	0.1	15	12	14
Bra040651	Cystatin/monellin superfamily protein	111	5	5	5	4	2	3	5	5	6
Bra029879	manganese superoxide dismutase 1	231	9	10	9	16	21	15	14	12	14
Bra013997	glycine-rich RNA-binding protein 2	145	2	3	2	3	4	3	5	5	4
Bra039757	O-Glycosyl hydrolases family 17 protein	505	3	3	0.1	6	6	4	0.1	0.1	0.1
Bra000311	Chitinase family protein	268	0.1	0.1	0.1	3	6	2	2	0.1	0.1
Bra030537	photosystem II family protein	172	3	4	4	3	0.1	0.1	0.1	0.1	0.1
Bra013859	acyl carrier protein 4	127	3	5	0.1	7	6	8	0.1	0.1	0.1
Bra017940	DPP6 N-terminal domain-like protein	705	5	3	5	10	16	12	9	6	8
Bra004531	cellular apoptosis susceptibility protein, putative / importin-alpha re-exporter, putative	971	3	2	2	3	3	3	5	5	4
Bra016010	basic transcription factor 3	166	0.1	2	0.1	2	4	4	0.1	0.1	0.1
Bra034394	copper/zinc superoxide dismutase 2	207	2	2	0.1	6	4	2	0.1	0.1	0.1
Bra024089	xyloglucan endotransglucosylase/hydrolase 24	279	13	10	17	10	10	9	14	11	11
Bra032344	carbamoyl phosphate synthetase B	1176	16	21	15	21	21	28	8	14	9
Bra013210	AMP-dependent synthetase and ligase family protein	721	0.1	0.1	0.1	5	0.1	4	10	9	12
Bra037484	Lactoylglutathione lyase / glyoxalase I family protein	165	3	0.1	0.1	0.1	0.1	0.1	6	4	4
Bra008402	proteasome subunit PAB1	235	3	3	5	10	10	7	7	7	7
Bra040427	ribosome recycling factor, chloroplast precursor	305	8	11	16	13	14	13	6	6	8
Bra004627	S-formylglutathione hydrolase	283	0.1	0.1	0.1	0.1	0.1	4	9	6	7
Bra010167	Single hybrid motif superfamily protein	166	5	5	3	4	3	3	9	8	5
Bra026426	Aldolase superfamily protein	358	50	47	54	56	56	43	49	45	46
Bra036321	Cysteine proteinases superfamily protein	358	0.1	0.1	0.1	0.1	4	0.1	5	6	9
Bra012899	methyl esterase 10	262	2	0.1	0.1	0.1	0.1	0.1	4	3	2
Bra016810	Glycine cleavage T-protein family	409	39	46	44	73	70	62	83	57	64
Bra037380	unknown protein;	162	24	29	20	19	16	20	23	19	23
Bra028615	actin 7	377	47	55	42	76	85	75	78	69	69
Bra025219	glyceraldehyde 3-phosphate dehydrogenase A subunit	380	118	124	131	134	145	136	147	139	131
Bra033708	translocase of outer membrane 22-V	97	0.1	0.1	0.1	2	0.1	0.1	3	3	3
Bra027469	thioredoxin 3	123	20	22	12	41	44	23	59	45	55
Bra039540	pyruvate orthophosphate dikinase	875	0.1	0.1	0.1	2	0.1	4	7	6	5
Bra014955	uricase / urate oxidase / nodulin 35, putative	304	0.1	0.1	0.1	0.1	3	0.1	5	6	3
Bra006975	glutamate-ammonia ligases;catalytics;glutamate-ammonia ligases	847	0.1	0.1	0.1	3	2	0.1	4	4	4
Bra015047	Heat shock protein 70 (Hsp 70) family protein	666	0.1	63	45	0.1	0.1	0.1	86	88	77
Bra008737	formate dehydrogenase	384	0.1	2	0.1	5	6	2	10	7	14
Bra023645	Cobalamin-independent synthase family protein	765	122	145	110	220	294	200	213	184	181
Bra016261	SPFH/Band 7/PHB domain-containing membrane-associated protein family	286	4	0.1	0.1	0.1	0.1	0.1	6	5	6
Bra027017	unknown protein;	236	5	5	4	4	5	6	0.1	2	0.1
Bra007417	citrate synthase 2	507	0.1	0.1	0.1	4	0.1	2	7	4	7
Bra000592	Leucine-rich repeat protein kinase family protein	826	0.1	0.1	0.1	3	3	4	2	0.1	2
Bra004639	NADPH-dependent thioredoxin reductase C	521	8	10	11	6	9	8	7	6	8
Bra031652	amidase 1	421	0.1	0.1	0.1	3	2	3	2	0.1	0.1
Bra034363	60S acidic ribosomal protein family	113	13	18	9	18	19	14	10	9	6
Bra006794	Ubiquitin-like superfamily protein	93	2	0.1	0.1	0.1	0.1	0.1	3	3	2
Bra009998	unknown protein;	439	5	6	5	7	12	11	6	2	3
Bra036452	CLIP-associated protein	1438	0.1	0.1	0.1	4	6	5	0.1	3	0.1
Bra016405	PDI-like 1-1	501	9	9	6	11	14	14	26	16	15
Bra041132	Kunitz family trypsin and protease inhibitor protein	222	2	0.1	0.1	0.1	0.1	0.1	3	2	3
Bra003537	D-isomer specific 2-hydroxyacid dehydrogenase family protein	313	0.1	0.1	0.1	0.1	2	0.1	3	3	2
Bra009040	RAB GTPase homolog A4A	223	7	3	0.1	0.1	0.1	0.1	7	7	5
Bra004781	O-acetylserine (thiol) lyase B	396	44	38	46	59	72	58	44	31	43
Bra011722	methyl esterase 9	257	0.1	0.1	0.1	6	6	0.1	15	7	9
Bra021477	Insulinase (Peptidase family M16) protein	527	6	11	8	18	23	22	33	16	16
Bra006248	Ribosomal protein S13/S18 family	169	11	13	10	9	11	11	8	10	6
Bra016163	Cupredoxin superfamily protein	539	0.1	0.1	0.1	0.1	2	0.1	6	2	2
Bra016269	senescence associated gene 24	119	6	6	0.1	0.1	0.1	0.1	9	6	7
Bra006963	Thioredoxin superfamily protein	174	23	30	24	20	23	18	23	27	29
Bra040448	Ribosomal protein L1p/L10e family	339	21	25	14	25	25	26	14	16	11
Bra028628	mitochondrial HSO70 2	680	0.1	0.1	0.1	13	0.1	0.1	17	26	18
Bra025066	Proteasome component (PCI) domain protein	386	0.1	0.1	0.1	2	0.1	0.1	3	2	4
Bra040977	photosystem II reaction center protein B	486	66	76	76	78	82	68	89	92	89
Bra020134	TCP-1/cpn60 chaperonin family protein	507	13	0.1	0.1	20	18	20	0.1	0.1	0.1
Bra000737	vacuolar ATP synthase subunit E1	431	20	20	21	25	23	23	29	28	29
Bra013145	ARM repeat superfamily protein	845	0.1	4	2	0.1	0.1	0.1	4	4	2
Bra040547	CONTAINS InterPro DOMAIN/s: Mediator complex subunit Med28 (InterPro:IPR021640); BEST Arabidopsis thaliana protein match is: unknown protein (TAIR:AT3G01670.1); Has 122 Blast hits to 112 proteins in 13 species: Archae - 0; Bacteria - 0; Metazoa - 0; Fungi - 0; Plants - 122; Viruses - 0; Other Eukaryotes - 0 (source: NCBI BLink).	739	7	4	6	11	12	10	16	11	11
Bra000667	isoamylase 3	720	4	3	2	7	8	9	6	7	6
Bra011172	H(+)-ATPase 2	948	52	67	58	44	49	60	64	56	54
Bra011079	regulatory particle AAA-ATPase 2A	443	4	8	4	16	12	15	15	13	9
Bra022449	eukaryotic initiation factor 4A-III	408	0.1	0.1	0.1	0.1	7	0.1	11	7	9
Bra024440	ADP-ribosylation factor-like A1D	184	0.1	0.1	0.1	4	4	8	0.1	0.1	3
Bra018565	chloroplast RNA binding	378	81	89	71	103	103	104	79	73	78
Bra006103	aspartate aminotransferase 3	452	0.1	0.1	0.1	7	0.1	0.1	18	9	6
Bra020793	long-chain acyl-CoA synthetase 6	629	0.1	0.1	0.1	4	0.1	2	7	6	3
Bra007856	DNA repair ATPase-related	457	0.1	0.1	0.1	2	2	0.1	2	3	5
Bra011081	Class II aminoacyl-tRNA and biotin synthetases superfamily protein	1770	68	70	42	39	50	53	18	36	27
Bra021847	Caleosin-related family protein	239	0.1	0.1	2	4	4	3	7	7	6
Bra015995	sucrose synthase 6	943	3	2	0.1	0.1	0.1	0.1	2	3	4
Bra020470	vegetative storage protein 2	268	4	3	2	15	20	7	21	7	11
Bra020813	Tyrosine transaminase family protein	435	25	21	18	48	60	36	51	35	51
Bra019788	Nucleic acid-binding, OB-fold-like protein	730	4	3	2	0.1	0.1	0.1	0.1	3	0.1
Bra028271	2 iron, 2 sulfur cluster binding	108	0.1	0.1	0.1	2	0.1	0.1	2	3	3
Bra004970	Eukaryotic translation initiation factor 2 subunit 1	342	0.1	0.1	0.1	2	0.1	0.1	2	3	3
Bra030494	Late embryogenesis abundant protein	151	0.1	0.1	0.1	11	0.1	0.1	17	16	11
Bra029730	Rhodanese/Cell cycle control phosphatase superfamily protein	97	2	3	0.1	0.1	0.1	0.1	5	2	2
Bra025480	6-phosphogluconate dehydrogenase family protein	487	8	0.1	0.1	12	7	15	0.1	0.1	0.1
Bra002922	microtubule-associated proteins 65-1	585	3	4	2	0.1	3	3	0.1	0.1	0.1
Bra038946	purple acid phosphatase 26	480	0.1	0.1	0.1	0.1	2	0.1	3	2	2
Bra016041	cinnamyl-alcohol dehydrogenase	354	0.1	0.1	0.1	0.1	2	0.1	3	2	2
Bra021555	Aldolase-type TIM barrel family protein	347	77	81	84	0.1	0.1	0.1	0.1	0.1	81
Bra022356	actin 2	323	30	34	30	46	51	46	47	44	46
Bra015025	beta-amylase 1	570	0.1	0.1	0.1	4	2	4	0.1	0.1	2
Bra020105	Myosin family protein with Dil domain	1527	3	4	2	0.1	2	0.1	4	4	4
Bra007317	eukaryotic translation initiation factor 3E	441	4	5	4	9	12	7	10	8	6
Bra007179	delta 1-pyrroline-5-carboxylate synthase 2	727	0.1	0.1	0.1	22	20	0.1	29	25	28
Bra014466	SEC7-like guanine nucleotide exchange family protein	1769	0.1	2	0.1	0.1	0.1	0.1	2	2	2
Bra036365	Thioredoxin superfamily protein	216	32	29	36	48	64	47	40	27	34
Bra013632	HSP70-interacting protein 1	408	3	0.1	0.1	3	6	3	0.1	0.1	0.1
Bra002617	LOCATED IN: thylakoid, chloroplast thylakoid membrane, chloroplast, chloroplast envelope; EXPRESSED IN: 22 plant structures; EXPRESSED DURING: 13 growth stages; CONTAINS InterPro DOMAIN/s: Thylakoid soluble phosphoprotein TSP9 (InterPro:IPR021584); Has 37 Blast hits to 37 proteins in 10 species: Archae - 0; Bacteria - 0; Metazoa - 0; Fungi - 0; Plants - 37; Viruses - 0; Other Eukaryotes - 0 (sour…	101	0.1	6	0.1	8	6	6	0.1	0.1	0.1
Bra015274	FASCICLIN-like arabinoogalactan 9	250	0.1	0.1	0.1	4	5	4	4	0.1	0.1
Bra008463	isopropylmalate dehydrogenase 2	406	15	16	15	28	44	29	25	13	19
Bra006775	regulatory particle triple-A ATPase 3	391	3	0.1	0.1	10	8	8	11	8	7
Bra006584	TCP-1/cpn60 chaperonin family protein	748	0.1	23	15	0.1	0.1	0.1	17	21	13
Bra001123	pathogenesis-related 4	214	0.1	0.1	0.1	0.1	3	0.1	4	3	3
Bra008533	unknown protein;	169	21	26	19	17	18	19	21	17	23
Bra017143	Neutral/alkaline non-lysosomal ceramidase	750	0.1	0.1	0.1	2	2	0.1	4	2	2
Bra016931	Embryo-specific protein 3, (ATS3)	183	0.1	0.1	0.1	2	3	0.1	3	3	3
Bra029574	root FNR 1	378	0.1	0.1	2	0.1	0.1	0.1	2	2	2
Bra028568	Eukaryotic aspartyl protease family protein	477	0.1	0.1	0.1	3	0.1	0.1	5	3	3
Bra029928	ribosomal protein S11-beta	159	7	7	7	0.1	0.1	0.1	0.1	11	4
Bra000144	rubisco activase	475	279	287	357	321	316	377	245	266	239
Bra018329	catalytics;transferases;[acyl-carrier-protein] S-malonyltransferases;binding	384	14	17	11	12	12	13	10	12	9
Bra021327	thylakoid lumen 18.3 kDa protein	284	37	30	45	40	42	33	62	50	55
Bra021277	receptor-like kinase 902	632	3	4	2	2	0.1	4	0.1	0.1	0.1
Bra002878	FASCICLIN-like arabinogalactan 1	426	4	9	4	12	11	16	4	5	5
Bra010320	Alkaline-phosphatase-like family protein	449	0.1	0.1	0.1	4	4	3	4	0.1	2
Bra030114	unknown protein;	187	0.1	0.1	0.1	2	0.1	0.1	3	2	2
Bra040080	serine hydroxymethyltransferase 3	529	3	0.1	3	2	4	5	0.1	0.1	0.1
Bra000853	GTP binding Elongation factor Tu family protein	453	13	11	10	18	21	17	23	17	22
Bra013983	Thiamine pyrophosphate dependent pyruvate decarboxylase family protein	574	6	3	4	12	12	9	10	7	8
Bra033851	Protein of unknown function (DUF760)	401	3	3	4	0.1	0.1	2	4	4	3
Bra037761	photosystem I reaction center subunit PSI-N, chloroplast, putative / PSI-N, putative (PSAN)	168	46	44	38	38	42	28	41	43	45
Bra031675	ATP binding;leucine-tRNA ligases;aminoacyl-tRNA ligases;nucleotide binding;ATP binding;aminoacyl-tRNA ligases	1156	18	23	19	23	25	26	20	20	16
Bra021175	nitrile specifier protein 1	259	0.1	0.1	0.1	2	0.1	0.1	2	3	2
Bra034975	aldehyde oxidase 2	1244	0.1	0.1	0.1	0.1	4	0.1	6	4	3
Bra023623	phosphoglucosamine mutase family protein	565	2	2	2	5	9	6	9	3	4
Bra011099	profilin 1	131	9	8	10	9	6	8	12	12	10
Bra000895	secretion-associated RAS super family 2	193	0.1	8	0.1	25	26	17	25	24	24
Bra004214	Glyoxalase/Bleomycin resistance protein/Dioxygenase superfamily protein	341	11	13	15	16	15	16	21	19	19
Bra011843	alanine:glyoxylate aminotransferase 2	476	0.1	0.1	0.1	0.1	0.1	4	8	3	5
Bra040903	TRAF-like family protein	382	8	6	4	20	12	13	17	13	17
Bra013517	photosystem II subunit QA	227	26	36	49	77	74	54	33	33	37
Bra037976	Dihydrolipoamide acetyltransferase, long form protein	541	0.1	0.1	0.1	0.1	4	0.1	3	4	7
Bra008643	Ribosomal protein S7e family protein	190	12	7	0.1	8	8	9	0.1	0.1	0.1
Bra015656	nitrate reductase 1	890	2	4	5	0.1	0.1	4	0.1	0.1	0.1
Bra014005	Inositol monophosphatase family protein	337	18	19	17	22	21	17	18	13	17
Bra017730	phospholipase D delta	839	3	4	4	5	2	9	18	14	13
Bra009349	unknown protein;	351	3	5	2	3	0.1	4	0.1	0.1	0.1
Bra020043	Translation elongation factor EF1B/ribosomal protein S6 family protein	225	7	7	4	5	6	7	0.1	3	0.1
Bra027184	Isochorismatase family protein	196	0.1	0.1	3	0.1	0.1	0.1	2	3	4
Bra004771	chitinase, putative	282	0.1	0.1	0.1	7	24	0.1	21	9	19
Bra038377	ATP synthase delta-subunit gene	234	37	36	37	52	61	45	38	34	40
Bra022221	Late embryogenesis abundant protein (LEA) family protein	298	0.1	0.1	0.1	6	0.1	0.1	11	6	4
Bra035087	photosystem II subunit R	140	18	19	18	15	20	16	21	17	22
Bra002483	GTP binding Elongation factor Tu family protein	449	104	122	95	141	152	124	167	171	165
Bra013540	oxidoreductase, zinc-binding dehydrogenase family protein	325	0.1	0.1	0.1	0.1	4	0.1	4	3	5
Bra030569	Lactate/malate dehydrogenase family protein	332	34	40	34	62	60	50	57	52	57
Bra031804	unknown protein;	204	0.1	0.1	0.1	4	2	0.1	8	3	2
Bra039681	glyoxalase II 3	244	0.1	0.1	0.1	7	0.1	0.1	9	6	6
Bra015779	Dehydrin family protein	195	0.1	0.1	0.1	7	6	7	0.1	6	0.1
Bra011689	alpha/beta-Hydrolases superfamily protein	373	0.1	4	4	3	3	3	0.1	0.1	0.1
Bra014468	N-terminal nucleophile aminohydrolases (Ntn hydrolases) superfamily protein	223	0.1	0.1	0.1	10	9	6	9	0.1	7
Bra033856	pinoresinol reductase 1	317	0.1	0.1	0.1	3	0.1	0.1	4	2	4
Bra023417	unknown protein;	665	40	34	33	49	55	60	83	56	56
Bra029906	chlorsulfuron/imidazolinone resistant 1	652	5	6	2	0.1	3	7	0.1	0.1	0.1
Bra010574	aminopeptidase P1	640	0.1	0.1	0.1	0.1	7	0.1	6	7	6
Bra037892	Molybdenum cofactor sulfurase family protein	313	2	2	3	0.1	0.1	0.1	0.1	0.1	3
Bra018338	ubiquitin-activating enzyme 1	1102	13	13	11	21	23	15	23	21	24
Bra023485	carbonic anhydrase 2	259	89	94	104	115	145	110	103	90	95
Bra016372	RAB GTPase homolog G3B	349	0.1	0.1	0.1	5	0.1	3	7	5	3
Bra005347	Single hybrid motif superfamily protein	166	3	2	2	0.1	0.1	0.1	4	0.1	0.1
Bra011366	Sec23/Sec24 protein transport family protein	1091	0.1	0.1	0.1	2	3	2	0.1	2	0.1
Bra019940	Glutathione S-transferase family protein	227	0.1	0.1	0.1	2	2	0.1	2	2	2
Bra039059	Peroxidase superfamily protein	326	0.1	0.1	0.1	2	0.1	0.1	2	2	2
Bra015164	unknown protein;	124	0.1	0.1	0.1	2	0.1	0.1	2	2	2
Bra034763	Amino acid dehydrogenase family protein	298	5	3	5	8	13	12	10	8	7
Bra040749	Granulin repeat cysteine protease family protein	457	15	19	22	21	21	17	32	23	31
Bra007610	Tyrosine transaminase family protein	545	19	19	16	39	49	30	45	27	47
Bra000687	ATP synthase delta-subunit gene	234	38	45	45	75	81	54	52	39	48
Bra028345	S-adenosyl-l-homocysteine (SAH) hydrolase 2	485	0.1	0.1	0.1	65	69	51	0.1	52	64
Bra028243	HIS HF	585	0.1	0.1	0.1	3	3	3	3	0.1	3
Bra002245	aspartate aminotransferase 2	405	9	5	4	11	16	12	21	12	19
Bra035791	trigalactosyldiacylglycerol2	777	4	3	5	0.1	0.1	2	2	2	4
Bra028586	G-box regulating factor 6	275	58	54	55	58	73	58	62	42	51
Bra021810	26S proteasome regulatory complex, non-ATPase subcomplex, Rpn2/Psmd1 subunit	1004	0.1	0.1	5	10	12	8	14	16	11
Bra027544	tubulin beta chain 4	445	0.1	0.1	0.1	0.1	0.1	96	79	70	90
Bra005019	rubisco activase	475	203	222	276	257	266	307	197	213	183
Bra018420	translation initiation factor 3 subunit H1	337	5	2	3	2	0.1	0.1	4	5	2
Bra003918	Peroxidase superfamily protein	362	0.1	0.1	4	11	8	7	11	7	13
Bra002092	VPS35 homolog A	788	0.1	0.1	0.1	2	0.1	5	7	3	3
Bra007655	rotamase CYP 4	257	44	45	47	69	82	65	84	58	59
Bra009101	Chalcone-flavanone isomerase family protein	205	0.1	0.1	0.1	2	0.1	2	2	3	2
Bra006208	magnesium-chelatase subunit chlH, chloroplast, putative / Mg-protoporphyrin IX chelatase, putative (CHLH)	1382	8	12	3	0.1	0.1	9	0.1	0.1	0.1
Bra010332	HAD superfamily, subfamily IIIB acid phosphatase	263	0.1	0.1	0.1	2	5	0.1	8	2	3
Bra024759	glutamine-tRNA ligase, putative / glutaminyl-tRNA synthetase, putative / GlnRS, putative	727	2	3	3	0.1	0.1	2	3	5	3
Bra007025	actin 3	377	0.1	0.1	0.1	0.1	28	18	23	12	24
Bra018019	AMP-dependent synthetase and ligase family protein	514	0.1	0.1	0.1	10	7	0.1	11	4	9
Bra008831	Aldolase-type TIM barrel family protein	439	5	7	2	15	14	20	11	16	17
Bra020541	TRAF-like family protein	351	0.1	0.1	0.1	11	12	9	15	0.1	12
Bra027582	2-oxoglutarate dehydrogenase, E1 component	1019	0.1	0.1	0.1	10	7	7	0.1	0.1	8
Bra014562	ketol-acid reductoisomerase	589	0.1	35	0.1	21	25	23	0.1	0.1	0.1
Bra002918	homolog of bacterial cytokinesis Z-ring protein FTSZ 1-1	411	4	6	5	0.1	0.1	8	0.1	0.1	0.1
Bra010347	Enoyl-CoA hydratase/isomerase family	734	0.1	0.1	0.1	7	6	6	11	6	0.1
Bra012747	alpha/beta-Hydrolases superfamily protein	330	2	0.1	0.1	4	4	2	7	4	5
Bra010169	non-intrinsic ABC protein 6	477	0.1	0.1	3	0.1	0.1	0.1	2	2	3
Bra028278	phosphoglucomutase	628	12	19	20	32	29	28	23	17	14
Bra041120	ATP synthase subunit alpha	504	48	62	61	96	114	81	78	77	69
Bra023072	Enolase	444	59	53	52	94	88	86	94	74	92
Bra000875	glutathione S-transferase F3	213	0.1	0.1	0.1	2	7	3	0.1	0.1	3
Bra027030	Glycosyl hydrolases family 32 protein	654	0.1	0.1	0.1	3	0.1	0.1	3	2	3
Bra038162	20S proteasome beta subunit G1	245	5	7	7	9	16	10	14	14	11
Bra002259	Mitochondrial substrate carrier family protein	259	19	26	20	17	25	15	27	22	22
Bra003597	nudix hydrolase homolog 3	758	5	4	3	7	16	6	16	9	14
Bra010097	aldehyde dehydrogenase 12A1	547	0.1	2	0.1	3	3	3	5	3	5
Bra037859	stromal ascorbate peroxidase	355	8	8	8	11	15	10	10	6	4
Bra011232	Cytosol aminopeptidase family protein	583	33	30	28	54	47	49	49	40	43
Bra018372	thiaminC	646	10	10	3	0.1	8	17	0.1	0.1	0.1
Bra001747	D-3-phosphoglycerate dehydrogenase	587	8	10	7	8	10	6	6	0.1	0.1
Bra008152	Pyridine nucleotide-disulphide oxidoreductase family protein	466	32	40	23	37	33	45	16	20	24
Bra001444	LYR family of Fe/S cluster biogenesis protein	133	4	6	3	10	6	4	0.1	0.1	3
Bra035349	2-phosphoglycolate phosphatase 1	359	23	25	35	39	34	33	25	23	24
Bra016238	Thiamin diphosphate-binding fold (THDP-binding) superfamily protein	400	0.1	0.1	0.1	3	2	4	3	4	0.1
Bra039513	NAD(P)-binding Rossmann-fold superfamily protein	262	0.1	0.1	3	3	2	2	0.1	0.1	0.1
Bra021412	Ribonuclease E inhibitor RraA/Dimethylmenaquinone methyltransferase	166	0.1	0.1	0.1	3	2	0.1	2	2	2
Bra027485	Lactate/malate dehydrogenase family protein	332	32	40	32	62	65	48	62	46	53
Bra003176	Ribosomal protein L17 family protein	208	5	4	3	3	2	3	4	6	5
Bra032004	UDP-GLUCOSE PYROPHOSPHORYLASE 1	434	20	24	20	33	41	33	48	29	44
Bra010528	phosphoserine aminotransferase	433	8	9	8	5	8	8	10	9	11
Bra015665	PDI-like 1-2	509	11	8	9	15	31	16	32	17	26
Bra017633	Cyclase family protein	259	0.1	0.1	2	3	4	3	4	3	7
Bra000947	unknown protein;	164	20	25	16	16	15	17	21	16	22
Bra010751	phytoene desaturase 3	557	6	7	6	5	7	6	9	6	7
Bra016989	Uroporphyrinogen decarboxylase	390	12	19	14	10	8	15	9	5	10
Bra022161	Mannose-binding lectin superfamily protein	450	4	15	4	36	27	29	65	15	27
Bra027928	Protein of unknown function, DUF538	155	0.1	0.1	0.1	3	4	3	6	0.1	3
Bra003231	alpha-soluble NSF attachment protein 2	289	6	7	3	3	4	3	7	6	11
Bra000808	AAA-type ATPase family protein	714	0.1	0.1	2	3	4	3	3	4	6
Bra039666	Class I glutamine amidotransferase-like superfamily protein	393	2	0.1	0.1	5	7	3	11	2	5
Bra016816	CLP protease proteolytic subunit 6	270	5	5	6	10	14	10	8	11	7
Bra035416	pyruvate dehydrogenase complex E1 alpha subunit	389	4	6	6	8	12	10	10	9	9
Bra017055	rubisco activase	443	241	251	336	272	280	341	225	236	209
Bra021132	phospholipase D alpha 1	812	26	22	15	38	45	41	48	35	33
Bra003564	P-loop containing nucleoside triphosphate hydrolases superfamily protein	459	24	21	21	19	18	28	21	14	14
Bra037675	HARMLESS TO OZONE LAYER 1	226	4	3	3	5	9	5	9	6	7
Bra035565	homolog of bacterial cytokinesis Z-ring protein FTSZ 1-1	363	0.1	0.1	0.1	3	3	0.1	2	2	3
Bra008723	voltage dependent anion channel 3	276	13	16	13	19	16	18	23	20	22
Bra012157	Subtilase family protein	760	3	5	2	5	6	6	11	9	6
Bra000294	Phosphoenolpyruvate carboxylase family protein	478	2	0.1	0.1	3	2	3	6	3	8
Bra009713	LOCATED IN: mitochondrion, chloroplast thylakoid membrane, chloroplast, plastid, chloroplast envelope; EXPRESSED IN: 24 plant structures; EXPRESSED DURING: 14 growth stages; CONTAINS InterPro DOMAIN/s: S-layer homology domain (InterPro:IPR001119); BEST Arabidopsis thaliana protein match is: unknown protein (TAIR:AT5G52410.2); Has 1807 Blast hits to 1807 proteins in 277 species: Archae - 0; Bacter…	932	2	5	2	0.1	0.1	2	2	5	4
Bra010243	N-terminal nucleophile aminohydrolases (Ntn hydrolases) superfamily protein	233	7	8	6	5	8	6	10	16	9
Bra001661	S-adenosylmethionine synthetase family protein	393	20	19	15	16	34	27	0.1	13	0.1
Bra005775	Pyridine nucleotide-disulphide oxidoreductase family protein	435	3	2	6	10	12	6	14	8	14
Bra017231	Enolase	476	57	55	51	90	86	84	95	69	86
Bra030588	vesicle-associated membrane protein 721	219	0.1	0.1	0.1	3	3	4	0.1	4	0.1
Bra018695	cell wall / vacuolar inhibitor of fructosidase 1	160	0.1	0.1	0.1	6	7	0.1	4	4	4
Bra022920	2-oxoglutarate (2OG) and Fe(II)-dependent oxygenase superfamily protein	379	2	3	7	11	5	6	0.1	0.1	3
Bra033901	ATP sulfurylase 1	459	4	5	4	8	6	11	5	0.1	0.1
Bra027021	Translation elongation factor EFG/EF2 protein	775	45	48	37	42	66	73	36	35	33
Bra012077	gamma carbonic anhydrase 3	253	2	2	2	2	0.1	0.1	3	2	3
Bra008130	Cyclophilin-like peptidyl-prolyl cis-trans isomerase family protein	320	0.1	2	0.1	3	5	3	3	3	3
Bra032152	homolog of Synechocystis YCF37	162	0.1	2	2	0.1	0.1	0.1	0.1	0.1	0.1
Bra010368	Nucleic acid-binding, OB-fold-like protein	152	0.1	2	2	0.1	0.1	0.1	0.1	0.1	0.1
Bra006519	ARM repeat superfamily protein	1115	0.1	0.1	4	9	7	7	6	7	6
Bra000974	plasma membrane intrinsic protein 1;4	288	21	25	30	20	11	21	36	23	23
Bra010350	Photosystem I reaction centre subunit IV / PsaE protein	143	40	36	42	43	33	29	43	43	49
Bra025079	CLP protease P4	288	14	14	10	21	34	25	22	17	13
Bra031978	polyribonucleotide nucleotidyltransferase, putative	866	0.1	0.1	0.1	6	0.1	9	4	13	4
Bra016017	P-loop containing nucleoside triphosphate hydrolases superfamily protein	421	2	3	5	3	4	6	3	0.1	0.1
Bra023598	nitrilase 2	344	18	24	25	37	67	42	70	34	51
Bra003767	glycine-tRNA ligases	1044	7	7	4	12	14	17	11	13	9
Bra028268	SH3 domain-containing protein	1189	0.1	0.1	0.1	2	2	4	2	5	0.1
Bra008812	phospholipid:diacylglycerol acyltransferase	666	0.1	3	2	0.1	0.1	0.1	0.1	0.1	0.1
Bra000355	Ras-related small GTP-binding family protein	208	0.1	0.1	0.1	12	7	7	0.1	0.1	12
Bra033054	ATPase, V0/A0 complex, subunit C/D	351	0.1	0.1	0.1	4	6	2	7	0.1	4
Bra024068	Class I glutamine amidotransferase-like superfamily protein	250	0.1	0.1	0.1	0.1	0.1	6	6	4	3
Bra017182	arginine biosynthesis protein ArgJ family	469	0.1	2	0.1	3	2	3	4	4	3
Bra012230	Dehydrin family protein	220	0.1	2	0.1	9	3	3	2	6	6
Bra019474	phototropin 1	963	0.1	4	3	0.1	0.1	0.1	0.1	0.1	0.1
Bra034214	Thioredoxin superfamily protein	184	16	17	12	19	18	17	11	15	10
Bra029285	unknown protein;	241	2	2	0.1	0.1	0.1	0.1	0.1	0.1	0.1
Bra031261	proton gradient regulation 7	310	2	2	0.1	0.1	0.1	0.1	0.1	0.1	0.1
Bra033548	ABC transporter family protein	693	2	2	0.1	0.1	0.1	0.1	0.1	0.1	0.1
Bra021017	starch synthase 4	1020	2	2	0.1	0.1	0.1	0.1	0.1	0.1	0.1
Bra011085	SNF7 family protein	212	2	2	0.1	0.1	0.1	0.1	0.1	0.1	0.1
Bra003159	uracil phosphoribosyltransferase	225	2	2	0.1	0.1	0.1	0.1	0.1	0.1	0.1
Bra010124	peroxin 14	531	2	2	0.1	0.1	0.1	0.1	0.1	0.1	0.1
Bra029859	calmodulin-domain protein kinase cdpk isoform 2	950	2	2	0.1	0.1	0.1	0.1	0.1	0.1	0.1
Bra021942	thioredoxin O1	194	0.1	0.1	2	4	3	2	5	3	3
Bra026112	Transducin family protein / WD-40 repeat family protein	1120	0.1	5	3	0.1	0.1	0.1	0.1	0.1	0.1
Bra035119	aldehyde dehydrogenase 5F1	530	3	5	8	10	9	5	16	15	11
Bra011076	Enoyl-CoA hydratase/isomerase family	722	7	5	2	9	12	10	17	12	12
Bra000955	MAP kinase 4	373	0.1	0.1	0.1	4	7	2	0.1	5	4
Bra019785	UDP-D-glucose/UDP-D-galactose 4-epimerase 1	335	2	0.1	2	0.1	0.1	0.1	0.1	0.1	0.1
Bra024486	Phosphatidylinositol 3- and 4-kinase family protein with FAT domain	3858	2	3	0.1	0.1	0.1	0.1	0.1	0.1	0.1
Bra040203	Li-tolerant lipase 1	366	2	3	0.1	0.1	0.1	0.1	0.1	0.1	0.1
Bra023822	unknown protein;	590	2	3	0.1	0.1	0.1	0.1	0.1	0.1	0.1
Bra019807	N-terminal nucleophile aminohydrolases (Ntn hydrolases) superfamily protein	274	0.1	0.1	0.1	0.1	0.1	6	4	5	3
Bra016084	PATELLIN 1	558	28	30	34	27	30	29	31	24	34
Bra040027	HEAT SHOCK PROTEIN 89.1	804	14	10	9	10	0.1	0.1	12	14	12
Bra040246	neurofilament protein-related	347	3	2	0.1	0.1	0.1	0.1	0.1	0.1	0.1
Bra029188	Transcriptional coactivator/pterin dehydratase	215	3	2	0.1	0.1	0.1	0.1	0.1	0.1	0.1
Bra020562	lon protease 1	1097	0.1	0.1	0.1	0.1	4	3	2	2	3
Bra022369	NAD(P)-binding Rossmann-fold superfamily protein	643	22	17	21	14	17	16	12	19	16
Bra018090	aldehyde dehydrogenase 2B4	539	9	10	17	15	19	19	29	24	20
Bra002524	Ribosomal protein S8 family protein	130	11	8	6	6	9	7	12	12	12
Bra029278	carboxyesterase 20	322	0.1	0.1	4	5	12	3	8	7	11
Bra019738	fumarylacetoacetase, putative	423	0.1	0.1	0.1	5	6	0.1	4	2	3
Bra016099	HISTIDINE BIOSYNTHESIS 6B	366	3	0.1	2	0.1	0.1	0.1	0.1	0.1	0.1
Bra024955	Hyaluronan / mRNA binding family	333	2	4	0.1	0.1	0.1	0.1	0.1	0.1	0.1
Bra020538	catalytics;carbohydrate kinases;phosphoglucan, water dikinases	1151	0.1	0.1	0.1	0.1	8	6	4	4	3
Bra025162	protein phosphatase 2A subunit A2	770	0.1	0.1	0.1	0.1	5	0.1	4	2	3
Bra008025	Kunitz family trypsin and protease inhibitor protein	210	4	4	0.1	36	23	10	52	18	27
Bra004275	hydroxypyruvate reductase	386	46	64	72	81	82	88	74	48	46
Bra001618	MAR binding filament-like protein 1	723	4	0.1	3	0.1	0.1	0.1	0.1	0.1	0.1
Bra033438	chloroplast RNA-binding protein 33	309	4	0.1	3	0.1	0.1	0.1	0.1	0.1	0.1
Bra015491	acyl-CoA oxidase 3	675	0.1	0.1	2	2	2	3	4	4	3
Bra004915	FASCICLIN-like arabinogalactan protein 8	416	18	22	15	38	38	31	26	12	22
Bra004850	Ras-related small GTP-binding family protein	208	6	7	0.1	0.1	0.1	0.1	0.1	0.1	0.1
Bra017693	catalase 2	485	28	36	33	51	51	46	47	38	42
Bra031870	Ribosomal L29 family protein	83	10	11	8	11	7	6	7	5	8
Bra013741	unknown protein;	242	2	0.1	4	0.1	0.1	0.1	0.1	0.1	0.1
Bra022742	thiazole biosynthetic enzyme, chloroplast (ARA6) (THI1) (THI4)	349	32	0.1	18	3	10	26	0.1	0.1	0.1
Bra018177	Glycosyl hydrolase family protein	608	4	0.1	6	0.1	0.1	0.1	0.1	0.1	0.1
Bra011035	prohibitin 1	290	6	0.1	0.1	10	9	10	8	11	11
Bra000623	Adenylate kinase family protein	245	7	0.1	7	0.1	0.1	0.1	0.1	0.1	0.1
Bra007126	phosphoribosylformylglycinamidine cyclo-ligase, chloroplast / phosphoribosyl-aminoimidazole synthetase / AIR synthase (PUR5)	336	4	0.1	2	0.1	0.1	0.1	0.1	0.1	0.1
Bra009900	DEAD box RNA helicase (RH3)	748	11	13	0.1	0.1	0.1	0.1	0.1	0.1	0.1
Bra022899	26S proteasome regulatory complex, non-ATPase subcomplex, Rpn2/Psmd1 subunit	1004	13	11	0.1	0.1	0.1	0.1	0.1	0.1	0.1
Bra004134	cytosolic NADP+-dependent isocitrate dehydrogenase	412	29	32	36	52	71	47	56	40	41
Bra013314	P-loop containing nucleoside triphosphate hydrolases superfamily protein	423	23	25	11	9	14	19	5	13	3
Bra026984	Glycosyl hydrolases family 32 protein	690	12	13	11	43	33	18	37	22	19
Bra001450	Nascent polypeptide-associated complex (NAC), alpha subunit family protein	189	10	0.1	8	0.1	0.1	0.1	0.1	0.1	0.1
Bra028006	Leucine-rich repeat (LRR) family protein	479	7	3	13	26	26	22	25	13	19
Bra008880	Protein of unknown function (DUF3411)	281	0.1	0.1	0.1	4	3	5	8	0.1	9
Bra024230	Tetratricopeptide repeat (TPR)-like superfamily protein	1774	13	20	0.1	0.1	0.1	0.1	0.1	0.1	0.1
Bra016627	uridylyltransferase-related	285	9	0.1	13	0.1	0.1	0.1	0.1	0.1	0.1
Bra015227	nitrite reductase 1	589	13	0.1	12	0.1	0.1	0.1	0.1	0.1	0.1
Bra031147	photosystem II reaction center PSB29 protein	296	10	12	12	19	25	16	12	11	15
Bra009005	Endomembrane protein 70 protein family	1178	10	11	9	13	14	12	18	17	12
Bra014305	Insulinase (Peptidase family M16) protein	502	4	9	7	15	20	12	19	11	11
Bra035214	Tyrosine transaminase family protein	439	24	16	0.1	0.1	0.1	0.1	0.1	0.1	0.1
Bra028124	NADH-ubiquinone dehydrogenase, mitochondrial, putative	746	16	16	10	23	26	23	25	30	25
Bra019049	protochlorophyllide oxidoreductase B	398	27	37	0.1	0.1	0.1	0.1	0.1	0.1	0.1
Bra030822	alpha/beta-Hydrolases superfamily protein	681	13	10	17	12	8	12	16	22	19
Bra017252	Tubulin/FtsZ family protein	477	9	11	10	12	19	21	13	8	5
Bra004875	Tetratricopeptide repeat (TPR)-like superfamily protein	220	11	12	9	10	9	10	12	11	14
Bra019950	dynamin-like protein 6	939	7	9	6	0.1	9	0.1	8	14	12
Bra015797	ATPase, V1 complex, subunit B protein	488	31	0.1	29	0.1	0.1	0.1	0.1	0.1	0.1
Bra027403	beta galactosidase 1	839	2	0.1	6	0.1	0.1	0.1	0.1	0.1	0.1
Bra025167	2-oxoacid dehydrogenases acyltransferase family protein	477	11	12	9	19	17	19	14	15	13
Bra014433	photosystem I light harvesting complex gene 2	256	33	37	51	83	80	63	70	42	44
Bra006933	ubiquitin E2 variant 1D-4	146	0.1	0.1	0.1	2	2	2	0.1	3	0.1
Bra033534	importin alpha isoform 2	530	4	0.1	0.1	5	9	8	5	4	10
Bra040607	Inositol monophosphatase family protein	592	0.1	0.1	2	4	4	2	3	2	3
Bra007832	translation initiation factor 3B1	714	3	5	3	10	6	7	7	11	8
Bra009360	ATP synthase alpha/beta family protein	553	88	0.1	98	0.1	0.1	0.1	0.1	0.1	0.1
Bra027670	monodehydroascorbate reductase 6	483	19	21	27	38	36	37	35	30	26
Bra006013	ATP synthase alpha/beta family protein	554	0.1	97	0.1	141	162	140	147	128	116
Bra025142	Chaperone protein htpG family protein	787	42	52	28	37	41	58	20	32	23
Bra037669	Late embryogenesis abundant protein, group 2	506	14	9	14	23	33	29	30	15	17
Bra031555	Pleckstrin homology (PH) domain superfamily protein	228	7	10	7	0.1	0.1	6	4	3	8
Bra016805	aspartic proteinase A1	507	6	0.1	0.1	8	10	7	16	6	9
Bra002306	Glutaredoxin family protein	132	0.1	0.1	2	3	3	2	2	4	4
Bra024095	P450 reductase 2	668	0.1	0.1	0.1	0.1	3	8	2	3	3
Bra021879	Ribosomal protein S5 family protein	302	19	19	13	16	18	13	17	15	15
Bra010775	Early-responsive to dehydration stress protein (ERD4)	723	12	11	16	18	8	13	21	25	34
Bra039708	O-acetylserine (thiol) lyase (OAS-TL) isoform A1	322	0.1	19	0.1	27	27	21	30	22	26
Bra001525	Root hair defective 3 GTP-binding protein (RHD3)	805	5	10	5	9	5	10	0.1	0.1	6
Bra014765	beta-hexosaminidase 1	550	0.1	0.1	0.1	2	4	2	6	0.1	6
Bra036058	2-oxoglutarate (2OG) and Fe(II)-dependent oxygenase superfamily protein	332	0.1	2	0.1	2	3	3	2	3	4
Bra033232	K+ efflux antiporter 1	1118	11	14	8	13	9	15	10	7	5
Bra026229	Sec14p-like phosphatidylinositol transfer family protein	532	22	16	14	13	8	14	10	14	13
Bra015799	PAM domain (PCI/PINT associated module) protein	482	9	11	8	12	19	16	22	14	16
Bra034128	sulfite reductase	638	15	16	19	27	18	24	16	12	16
Bra035786	endoribonuclease L-PSP family protein	188	0.1	9	0.1	14	13	10	9	15	10
Bra015520	photosystem II subunit P-1	263	66	58	81	69	66	57	51	70	50
Bra039113	carbonic anhydrase 1	334	161	160	166	204	237	182	202	176	151
Bra012716	unknown protein;	107	3	0.1	0.1	4	4	3	6	5	3
Bra018226	Ribosomal protein S3 family protein	249	27	28	17	20	22	23	35	27	29
Bra014448	NAD(P)-binding Rossmann-fold superfamily protein	297	0.1	0.1	0.1	0.1	0.1	0.1	2	2	0.1
Bra033833	Polyketide synthase, enoylreductase family protein	372	0.1	0.1	0.1	0.1	0.1	0.1	2	2	0.1
Bra031007	basic transcription factor 3	156	0.1	0.1	0.1	0.1	0.1	0.1	2	2	0.1
Bra024484	Sec1/munc18-like (SM) proteins superfamily	637	0.1	0.1	0.1	0.1	0.1	0.1	2	2	0.1
Bra006107	NADP-malic enzyme 2	588	18	14	25	44	54	34	43	27	20
Bra004158	RNA-binding (RRM/RBD/RNP motifs) family protein	288	0.1	0.1	0.1	0.1	0.1	0.1	3	3	0.1
Bra009010	NAD(P)-binding Rossmann-fold superfamily protein	288	0.1	0.1	0.1	0.1	0.1	0.1	3	3	0.1
Bra013154	unknown protein;	531	0.1	0.1	0.1	0.1	0.1	0.1	3	3	0.1
Bra035693	vacuolar proton ATPase A1	820	0.1	0.1	0.1	0.1	0.1	0.1	3	3	0.1
Bra002645	NAD(P)-binding Rossmann-fold superfamily protein	323	0.1	0.1	0.1	0.1	0.1	0.1	4	3	0.1
Bra011858	GTP-binding protein-related	369	0.1	0.1	0.1	0.1	0.1	0.1	4	3	0.1
Bra022584	CAP160 protein	572	0.1	0.1	0.1	0.1	0.1	0.1	5	4	0.1
Bra034309	soluble epoxide hydrolase	319	0.1	0.1	0.1	0.1	0.1	0.1	3	2	0.1
Bra001000	Galactose mutarotase-like superfamily protein	703	0.1	0.1	0.1	0.1	0.1	0.1	3	2	0.1
Bra040873	Peptidase M20/M25/M40 family protein	437	0.1	0.1	0.1	0.1	0.1	0.1	3	2	0.1
Bra018802	ARP protein (REF)	629	0.1	4	0.1	7	5	4	6	4	5
Bra015809	plant defensin 1.2b	79	0.1	0.1	0.1	0.1	0.1	0.1	7	7	0.1
Bra003984	senescence associated gene 24	184	0.1	0.1	0.1	0.1	0.1	0.1	12	10	0.1
Bra037641	Ras-related small GTP-binding family protein	208	0.1	0.1	0.1	0.1	0.1	0.1	12	10	0.1
Bra016282	Eukaryotic translation initiation factor 5A-1 (eIF-5A 1) protein	159	7	6	7	10	10	3	0.1	0.1	6
Bra029570	ubiquitin 11	153	38	36	28	46	39	34	55	55	45
Bra010498	chloroplast heat shock protein 70-1	717	0.1	0.1	0.1	0.1	0.1	0.1	70	72	0.1
Bra036282	sucrose synthase 3	811	0.1	0.1	0.1	0.1	0.1	0.1	5	3	0.1
Bra005733	ATPase, AAA-type, CDC48 protein	1104	0.1	0.1	0.1	0.1	0.1	0.1	46	52	0.1
Bra026019	uridylyltransferase-related	283	0.1	7	0.1	12	19	10	7	3	6
Bra022927	peroxisomal 3-ketoacyl-CoA thiolase 3	460	0.1	0.1	0.1	0.1	0.1	0.1	19	11	0.1
Bra022247	glutamine synthetase 1.3	354	0.1	0.1	0.1	0.1	0.1	0.1	9	5	0.1
Bra020215	Alanyl-tRNA synthetase, class IIc	969	16	24	17	11	28	18	7	16	6
Bra037296	rotamase CYP 3	171	33	37	31	52	60	49	46	49	47
Bra003569	TOPLESS-related 1	1089	3	0.1	0.1	5	4	2	7	4	4
Bra036577	catalytics;carbohydrate kinases;phosphoglucan, water dikinases	1184	5	5	4	4	5	7	0.1	5	0.1
Bra027391	Root hair defective 3 GTP-binding protein (RHD3)	770	0.1	0.1	0.1	0.1	0.1	0.1	4	6	0.1
Bra040067	vesicle-associated membrane protein 711	219	0.1	0.1	0.1	0.1	0.1	0.1	4	6	0.1
Bra037560	actin 2	353	35	34	39	53	61	53	57	48	60
Bra010897	FH interacting protein 1	255	0.1	0.1	0.1	0.1	0.1	0.1	2	3	0.1
Bra011605	calmodulin-domain protein kinase 5	545	0.1	0.1	0.1	0.1	0.1	0.1	2	3	0.1
Bra028274	subtilase 1.3	775	0.1	0.1	0.1	0.1	0.1	0.1	2	3	0.1
Bra016615	glutathione S-transferase tau 26	219	0.1	0.1	0.1	0.1	0.1	0.1	2	3	0.1
Bra037246	Phosphatidylinositol 3- and 4-kinase family protein with FAT domain	3775	0.1	0.1	0.1	0.1	0.1	0.1	2	3	0.1
Bra017223	ARM repeat superfamily protein	1336	0.1	0.1	0.1	0.1	0.1	0.1	2	3	0.1
Bra035027	general regulatory factor 2	260	47	50	47	46	66	54	0.1	0.1	53
Bra018842	thioredoxin X	182	7	7	6	6	7	7	4	7	4
Bra010369	ADP/ATP carrier 3	377	0.1	0.1	0.1	0.1	0.1	0.1	19	0.1	15
Bra037495	ADP glucose pyrophosphorylase 1	512	0.1	0.1	0.1	0.1	0.1	0.1	18	0.1	18
Bra020124	chaperonin 20	253	22	23	19	24	19	20	19	22	19
Bra008695	UDP-glucose 6-dehydrogenase family protein	480	0.1	18	0.1	20	17	16	25	24	26
Bra016570	Transducin/WD40 repeat-like superfamily protein	327	0.1	0.1	0.1	0.1	0.1	0.1	27	0.1	16
Bra016811	glyoxalase I homolog	283	4	5	0.1	18	15	14	29	19	24
Bra012418	Thiamin diphosphate-binding fold (THDP-binding) superfamily protein	396	0.1	0.1	0.1	0.1	0.1	0.1	5	0.1	4
Bra017165	NAD(P)-binding Rossmann-fold superfamily protein	328	22	22	26	36	37	32	36	29	32
Bra015693	alcohol dehydrogenase 1	379	0.1	0.1	0.1	0.1	0.1	0.1	10	0.1	6
Bra006864	phosphofructokinase 7	485	0.1	0.1	0.1	0.1	0.1	0.1	4	0.1	3
Bra002332	sucrose synthase 1	786	5	2	7	11	5	8	21	11	14
Bra021682	aspartate aminotransferase 1	426	0.1	0.1	0.1	0.1	0.1	0.1	3	0.1	3
Bra030405	Insulinase (Peptidase family M16) protein	504	0.1	0.1	0.1	0.1	0.1	0.1	19	0.1	9
Bra020393	temperature-induced lipocalin	187	0.1	0.1	0.1	0.1	0.1	0.1	3	0.1	2
Bra017350	allene oxide cyclase 3	253	0.1	0.1	0.1	0.1	0.1	0.1	3	0.1	2
Bra001220	2-oxoacid dehydrogenases acyltransferase family protein	494	0.1	0.1	0.1	0.1	0.1	0.1	3	0.1	2
Bra019012	Legume lectin family protein	274	0.1	0.1	0.1	0.1	0.1	0.1	3	0.1	2
Bra008915	Glutathione S-transferase, C-terminal-like;Translation elongation factor EF1B/ribosomal protein S6	227	0.1	0.1	0.1	0.1	0.1	0.1	3	0.1	2
Bra024255	Inositol monophosphatase family protein	355	0.1	0.1	0.1	0.1	0.1	0.1	5	0.1	3
Bra015547	unknown protein;	361	0.1	0.1	0.1	0.1	0.1	0.1	5	0.1	3
Bra002241	Translation elongation factor EF1B/ribosomal protein S6 family protein	223	0.1	0.1	0.1	0.1	0.1	0.1	5	0.1	6
Bra025984	alanine aminotransferas	537	4	5	8	13	15	10	21	8	13
Bra014816	glycoside hydrolase family 2 protein	1104	3	3	3	4	4	2	6	4	7
Bra033311	translocon at the outer envelope membrane of chloroplasts 33	298	0.1	0.1	0.1	0.1	0.1	0.1	2	0.1	2
Bra000659	arginase	341	0.1	0.1	0.1	0.1	0.1	0.1	2	0.1	2
Bra008938	NADH-ubiquinone oxidoreductase 20 kDa subunit, mitochondrial	216	0.1	0.1	0.1	0.1	0.1	0.1	2	0.1	2
Bra005897	Polynucleotidyl transferase, ribonuclease H-like superfamily protein	199	0.1	0.1	0.1	0.1	0.1	0.1	2	0.1	2
Bra005163	NAD(P)-linked oxidoreductase superfamily protein	301	0.1	0.1	0.1	0.1	0.1	0.1	2	0.1	2
Bra018726	D-cysteine desulfhydrase	319	6	8	10	16	16	14	19	10	13
Bra013477	tripeptidyl peptidase ii	1318	0.1	2	0.1	0.1	7	0.1	10	12	9
Bra029381	ribosomal protein S11-beta	159	0.1	0.1	0.1	0.1	0.1	0.1	9	0.1	4
Bra003991	ribosomal protein L34	120	6	7	6	8	0.1	0.1	8	6	6
Bra000019	NAD(P)-linked oxidoreductase superfamily protein	315	0.1	0.1	0.1	0.1	0.1	0.1	4	0.1	2
Bra003054	ARM repeat superfamily protein	868	5	5	4	6	10	8	11	7	8
Bra006879	acyl-CoA oxidase 4	439	0.1	0.1	3	6	0.1	0.1	16	10	11
Bra019457	INVOLVED IN: protein processing; LOCATED IN: mitochondrion, endoplasmic reticulum, plasma membrane, vacuole; EXPRESSED IN: 25 plant structures; EXPRESSED DURING: 13 growth stages; CONTAINS InterPro DOMAIN/s: Nicalin (InterPro:IPR016574), EF-Hand 1, calcium-binding site (InterPro:IPR018247), Nicastrin (InterPro:IPR008710); Has 245 Blast hits to 243 proteins in 99 species: Archae - 6; Bacteria - 10…	562	0.1	0.1	0.1	0.1	0.1	0.1	2	0.1	3
Bra038799	FAD-binding Berberine family protein	535	0.1	0.1	0.1	0.1	0.1	0.1	2	0.1	3
Bra033140	glutathione peroxidase 6	229	0.1	0.1	6	7	10	6	5	8	9
Bra024200	26S proteasome regulatory subunit S2 1B	891	21	24	16	24	25	24	31	37	29
Bra000567	Mog1/PsbP/DUF1795-like photosystem II reaction center PsbP family protein	237	12	8	10	10	12	8	11	7	6
Bra001789	calmodulin-domain protein kinase 9	542	2	0.1	0.1	3	2	2	3	2	4
Bra037506	nitrile specifier protein 5	322	0.1	0.1	3	6	3	0.1	26	8	19
Bra013675	glutamate-cysteine ligase	511	6	7	7	12	12	10	8	5	9
Bra008392	photosystem II subunit R	138	0.1	0.1	0.1	11	16	0.1	0.1	0.1	0.1
Bra011405	glycine decarboxylase P-protein 1	1045	72	91	75	132	116	149	117	103	98
Bra032361	Transketolase family protein	307	2	4	3	5	6	4	5	0.1	0.1
Bra019639	Aldolase superfamily protein	358	49	0.1	0.1	52	59	44	58	52	60
Bra033706	GroES-like zinc-binding dehydrogenase family protein	379	10	12	7	23	24	14	18	13	13
Bra004101	PLC-like phosphodiesterase family protein	743	4	9	6	14	18	10	10	6	8
Bra002733	H(+)-ATPase 3	952	0.1	0.1	18	12	16	16	28	23	22
Bra003029	haloacid dehalogenase-like hydrolase family protein	519	4	3	2	8	11	6	8	3	5
Bra000929	60S acidic ribosomal protein family	113	2	3	3	8	5	7	0.1	5	0.1
Bra036480	hydroxycinnamoyl-CoA shikimate/quinate hydroxycinnamoyl transferase	424	0.1	0.1	0.1	4	3	0.1	0.1	0.1	0.1
Bra025088	Haloacid dehalogenase-like hydrolase (HAD) superfamily protein	374	11	9	10	12	11	9	7	9	9
Bra020277	actin depolymerizing factor 1	149	0.1	0.1	0.1	0.1	13	12	0.1	0.1	0.1
Bra024287	FK506-binding protein 12	112	4	4	5	5	3	2	5	6	4
Bra000769	cytochrome P450, family 706, subfamily A, polypeptide 6	516	0.1	0.1	0.1	2	2	0.1	0.1	0.1	0.1
Bra031802	beta-hydroxyisobutyryl-CoA hydrolase 1	376	0.1	0.1	0.1	2	2	0.1	0.1	0.1	0.1
Bra033285	60S acidic ribosomal protein family	154	0.1	0.1	0.1	2	2	0.1	0.1	0.1	0.1
Bra027224	Rubredoxin-like superfamily protein	124	0.1	0.1	0.1	5	3	0.1	0.1	0.1	0.1
Bra010234	Coatomer, beta subunit	948	0.1	0.1	0.1	0.1	10	9	0.1	0.1	0.1
Bra018301	winged-helix DNA-binding transcription factor family protein	257	0.1	0.1	0.1	2	3	0.1	0.1	0.1	0.1
Bra004937	signal recognition particle receptor protein, chloroplast (FTSY)	368	0.1	0.1	0.1	2	3	0.1	0.1	0.1	0.1
Bra034927	glyceraldehyde-3-phosphate dehydrogenase B subunit	448	167	172	165	172	195	188	191	183	190
Bra034757	Nascent polypeptide-associated complex (NAC), alpha subunit family protein	204	0.1	11	0.1	11	12	9	14	14	10
Bra005345	Chitinase family protein	311	5	5	12	12	23	10	6	4	7
Bra039627	pyrophosphorylase 2	682	0.1	0.1	0.1	3	2	0.1	0.1	0.1	0.1
Bra031181	fructose-bisphosphate aldolase 1	400	44	40	45	43	58	45	40	44	39
Bra038538	myo-inositol-1-phosphate synthase 2	510	0.1	0.1	0.1	0.1	13	30	0.1	0.1	0.1
Bra029700	Phosphoglycerate mutase, 2,3-bisphosphoglycerate-independent	560	20	19	8	29	37	26	48	31	30
Bra011819	3-deoxy-D-arabino-heptulosonate 7-phosphate synthase 1	518	7	10	3	10	10	16	6	4	4
Bra027431	TCP-1/cpn60 chaperonin family protein	519	0.1	8	0.1	10	11	9	9	7	5
Bra011774	Acetamidase/Formamidase family protein	454	0.1	0.1	0.1	0.1	5	4	0.1	0.1	0.1
Bra011848	Coatomer, alpha subunit	733	0.1	0.1	0.1	0.1	0.1	0.1	0.1	11	10
Bra016271	valyl-tRNA synthetase / valine--tRNA ligase (VALRS)	1047	0.1	0.1	0.1	0.1	4	4	0.1	0.1	0.1
Bra010749	Histidyl-tRNA synthetase 1	487	0.1	0.1	0.1	0.1	4	4	0.1	0.1	0.1
Bra029966	branched-chain aminotransferase 3	414	0.1	0.1	0.1	4	2	0.1	0.1	0.1	0.1
Bra033446	Dihydrolipoamide acetyltransferase, long form protein	641	0.1	0.1	4	3	4	3	6	6	4
Bra003524	S-adenosyl-L-methionine-dependent methyltransferases superfamily protein	337	13	23	16	18	15	17	13	13	15
Bra014785	Ras-related small GTP-binding family protein	199	0.1	0.1	0.1	0.1	4	3	0.1	0.1	0.1
Bra007565	N-terminal nucleophile aminohydrolases (Ntn hydrolases) superfamily protein	223	0.1	0.1	0.1	0.1	0.1	0.1	0.1	9	7
Bra006553	Ribosomal protein S8e family protein	289	32	39	25	36	38	33	48	43	44
Bra015922	heat shock protein 101	911	0.1	0.1	0.1	0.1	0.1	0.1	0.1	7	6
Bra012238	catalase 3	492	55	54	59	95	113	71	88	77	74
Bra016706	Ribosomal protein L16p/L10e family protein	183	9	9	5	12	10	12	0.1	0.1	11
Bra022266	S-adenosyl-L-methionine-dependent methyltransferases superfamily protein	506	2	2	0.1	7	5	10	7	4	8
Bra015023	dehydratase family	611	16	14	11	20	19	18	18	10	11
Bra041122	Photosystem I, PsaA/PsaB protein	546	7	11	17	9	9	18	37	23	17
Bra000315	Chitinase family protein	278	0.1	0.1	0.1	0.1	7	3	0.1	0.1	0.1
Bra001738	presequence protease 1	1074	31	32	30	36	46	34	27	35	25
Bra000182	Eukaryotic translation initiation factor 2 subunit 1	342	0.1	0.1	0.1	0.1	3	2	0.1	0.1	0.1
Bra033070	AIG2-like (avirulence induced gene) family protein	168	0.1	0.1	0.1	0.1	3	2	0.1	0.1	0.1
Bra008826	ADP/ATP carrier 2	373	22	26	20	35	37	33	0.1	39	0.1
Bra000214	calmodulin 5	149	0.1	0.1	0.1	11	0.1	6	0.1	0.1	0.1
Bra040895	metallopeptidase M24 family protein	393	0.1	0.1	0.1	0.1	0.1	0.1	0.1	6	4
Bra033718	phytochelatin synthase 1 (PCS1)	481	0.1	0.1	0.1	0.1	0.1	0.1	0.1	4	5
Bra002101	Co-chaperone GrpE family protein	319	5	7	4	7	10	10	6	6	4
Bra008453	HOPW1-1-interacting 1	448	0.1	0.1	0.1	0.1	0.1	0.1	0.1	4	4
Bra005378	disease resistance family protein / LRR family protein	904	0.1	0.1	0.1	0.1	2	2	0.1	0.1	0.1
Bra019143	RNA binding Plectin/S10 domain-containing protein	181	10	6	5	17	20	12	16	9	14
Bra018595	gamma histone variant H2AX	142	0.1	0.1	0.1	0.1	2	3	0.1	0.1	0.1
Bra010119	SPFH/Band 7/PHB domain-containing membrane-associated protein family	287	0.1	0.1	0.1	0.1	0.1	0.1	0.1	3	4
Bra035909	heat shock cognate protein 70-1	572	106	108	82	141	155	143	159	147	137
Bra020801	neurofilament protein-related	516	14	15	14	9	5	8	0.1	3	5
Bra024633	Putative thiol-disulphide oxidoreductase DCC	597	0.1	2	0.1	2	2	3	2	2	2
Bra036344	cytochrome P450, family 71, subfamily B, polypeptide 23	436	0.1	0.1	0.1	0.1	5	2	0.1	0.1	0.1
Bra034580	Pyridoxal phosphate (PLP)-dependent transferases superfamily protein	756	11	18	13	26	24	20	22	11	11
Bra002973	Translation protein SH3-like family protein	199	7	11	8	7	7	8	5	8	7
Bra037113	Subtilase family protein	722	0.1	0.1	0.1	3	16	0.1	0.1	0.1	0.1
Bra031745	translation initiation factor 3 subunit H1	337	0.1	0.1	0.1	0.1	2	4	0.1	0.1	0.1
Bra003053	Tetratricopeptide repeat (TPR)-like superfamily protein	241	11	9	13	8	10	5	8	15	10
Bra010306	GDSL-like Lipase/Acylhydrolase superfamily protein	350	5	6	3	11	9	6	16	7	13
Bra031117	NAD(P)-binding Rossmann-fold superfamily protein	403	9	0.1	0.1	9	6	8	16	8	10
Bra005239	glucan synthase-like 8	1909	0.1	0.1	0.1	0.1	0.1	0.1	0.1	3	2
Bra030584	potassium channel beta subunit 1	328	0.1	0.1	0.1	0.1	0.1	0.1	0.1	3	2
Bra014252	Ergosterol biosynthesis ERG4/ERG24 family	432	0.1	0.1	0.1	0.1	0.1	0.1	0.1	3	2
Bra012041	DNAJ heat shock N-terminal domain-containing protein	2549	0.1	0.1	0.1	0.1	0.1	0.1	0.1	2	2
Bra017016	receptor kinase 3	1165	0.1	0.1	0.1	0.1	0.1	0.1	0.1	2	2
Bra031395	Oligosaccharyltransferase complex/magnesium transporter family protein	346	0.1	0.1	0.1	0.1	0.1	0.1	0.1	2	2
Bra038761	DNA-directed RNA polymerase family protein	1126	0.1	0.1	0.1	0.1	0.1	0.1	0.1	2	2
Bra004998	Microsomal signal peptidase 25 kDa subunit (SPC25)	198	0.1	0.1	0.1	0.1	0.1	0.1	0.1	2	2
Bra009581	RNA-binding (RRM/RBD/RNP motifs) family protein	276	0.1	0.1	0.1	0.1	0.1	0.1	0.1	2	2
Bra022242	Dihydroxyacetone kinase	651	0.1	0.1	0.1	0.1	0.1	0.1	0.1	2	2
Bra021853	Ribosomal L28 family	142	0.1	0.1	0.1	0.1	0.1	0.1	0.1	2	2
Bra027257	Legume lectin family protein	276	0.1	0.1	2	12	6	0.1	20	9	16
Bra022486	plastid transcriptionally active 4	325	16	12	13	11	18	15	3	0.1	8
Bra031279	2-oxoglutarate (2OG) and Fe(II)-dependent oxygenase superfamily protein	324	0.1	0.1	0.1	0.1	0.1	0.1	0.1	2	3
Bra023575	ABC transporter family protein	596	0.1	0.1	0.1	0.1	0.1	0.1	0.1	2	3
Bra021242	Protein kinase superfamily protein	364	0.1	0.1	0.1	0.1	0.1	0.1	0.1	2	3
Bra009789	Protein of unknown function (DUF3411)	529	0.1	0.1	0.1	0.1	0.1	0.1	0.1	2	3
Bra037844	voltage dependent anion channel 2	276	7	8	10	11	6	8	13	11	13
Bra028132	glutamine synthase clone R1	356	0.1	0.1	0.1	0.1	0.1	0.1	0.1	4	2
Bra019223	P450 reductase 1	672	0.1	0.1	0.1	0.1	0.1	0.1	0.1	4	2
Bra023426	phospholipid:diacylglycerol acyltransferase	597	4	0.1	0.1	3	6	5	3	6	5
Bra014635	beta-1,3-glucanase 2	346	0.1	0.1	2	3	27	2	2	0.1	0.1
Bra018893	Plastid-lipid associated protein PAP / fibrillin family protein	407	5	4	7	3	3	5	9	4	5
Bra031705	acetyl Co-enzyme a carboxylase biotin carboxylase subunit	724	23	21	19	0.1	0.1	36	26	26	21
Bra011223	serine carboxypeptidase-like 29	481	0.1	0.1	3	2	5	4	8	2	3
Bra023704	Eukaryotic aspartyl protease family protein	389	0.1	0.1	0.1	3	0.1	2	0.1	0.1	0.1
Bra016812	O-Glycosyl hydrolases family 17 protein	519	0.1	0.1	0.1	3	0.1	2	0.1	0.1	0.1
Bra006443	H/ACA ribonucleoprotein complex, subunit Gar1/Naf1 protein	199	0.1	0.1	0.1	3	0.1	2	0.1	0.1	0.1
Bra003352	vacuolar ATP synthase subunit D (VATD) / V-ATPase D subunit / vacuolar proton pump D subunit (VATPD)	261	6	5	9	9	10	11	11	14	15
Bra002326	chaperonin 20	250	26	0.1	0.1	27	17	24	25	29	24
Bra027168	GDSL-like Lipase/Acylhydrolase superfamily protein	354	3	3	3	3	4	5	5	5	6
Bra010627	elicitor-activated gene 3-2	337	0.1	0.1	0.1	2	0.1	2	0.1	0.1	0.1
Bra026600	NAD(P)-binding Rossmann-fold superfamily protein	321	0.1	0.1	0.1	2	0.1	2	0.1	0.1	0.1
Bra010499	NAD(P)-binding Rossmann-fold superfamily protein	390	0.1	0.1	0.1	2	0.1	2	0.1	0.1	0.1
Bra018743	|	186	0.1	0.1	0.1	2	0.1	3	0.1	0.1	0.1
Bra015942	enolase 1	478	0.1	0.1	0.1	2	0.1	3	0.1	0.1	0.1
Bra029552	Inositol monophosphatase family protein	388	0.1	0.1	0.1	2	0.1	3	0.1	0.1	0.1
Bra015721	thioredoxin Y1	172	0.1	0.1	0.1	4	0.1	2	0.1	0.1	0.1
Bra002385	DNAJ homologue 3	422	4	4	5	6	10	10	7	7	8
Bra037609	ribosomal protein L9	196	13	11	10	14	18	13	11	12	10
Bra029168	low psii accumulation2	177	4	5	6	4	5	3	0.1	2	2
Bra034675	plasma membrane intrinsic protein 3	281	26	36	40	35	24	40	31	24	25
Bra035529	glutamine synthetase 2	428	69	78	77	101	116	110	89	95	83
Bra010731	PLC-like phosphodiesterases superfamily protein	318	0.1	2	2	3	0.1	0.1	8	4	8
Bra015790	chloroplastic drought-induced stress protein of 32 kD	306	5	7	7	8	8	7	5	2	0.1
Bra012100	succinate dehydrogenase 1-1	624	7	12	10	17	18	13	17	16	14
Bra022597	Class II aaRS and biotin synthetases superfamily protein	542	2	3	2	3	11	5	2	2	3
Bra027372	Tetratricopeptide repeat (TPR)-like superfamily protein	308	3	4	2	0.1	0.1	4	2	3	4
Bra029193	Clp ATPase	943	0.1	0.1	5	7	7	0.1	27	23	14
Bra002522	actin depolymerizing factor 3	139	9	5	6	12	0.1	0.1	8	8	8
Bra023518	casein lytic proteinase B3	963	14	12	7	12	16	14	17	28	24
Bra011168	villin 4	966	2	0.1	2	0.1	3	0.1	6	6	6
Bra025895	Ribosomal protein L6 family protein	234	12	19	11	16	14	15	25	20	17
Bra037278	homoserine kinase	370	3	4	4	0.1	0.1	5	3	4	2
Bra022459	cell elongation protein / DWARF1 / DIMINUTO (DIM)	561	15	19	14	9	8	15	8	14	15
Bra023084	methionine adenosyltransferase 3	390	18	19	13	0.1	0.1	30	20	13	20
Bra001454	basic chitinase	471	0.1	0.1	0.1	10	0.1	2	0.1	0.1	0.1
Bra013224	rotamase FKBP 1	567	16	11	7	10	11	8	16	16	14
Bra004675	Mitochondrial import inner membrane translocase subunit Tim17/Tim22/Tim23 family protein	160	3	0.1	0.1	6	7	6	0.1	0.1	3
Bra039731	acylaminoacyl-peptidase-related	766	7	5	5	9	12	7	12	9	9
Bra010384	Tetratricopeptide repeat (TPR)-like superfamily protein	1760	16	25	7	6	7	13	3	10	5
Bra003147	diaminopimelate epimerase family protein	366	8	7	3	6	8	8	3	4	4
Bra005236	methionine adenosyltransferase 3	373	20	17	14	20	35	32	16	13	20
Bra034813	Dihydroneopterin aldolase	150	2	2	2	5	3	2	4	0.1	0.1
Bra035365	P-loop containing nucleoside triphosphate hydrolases superfamily protein	831	5	3	5	0.1	2	3	0.1	2	0.1
Bra023446	phosphate transporter 3;1	372	5	15	12	21	27	25	32	15	21
Bra023851	20S proteasome alpha subunit C1	250	8	5	7	10	14	9	13	13	10
Bra001154	Ribosomal L22e protein family	124	17	15	9	11	14	9	15	17	18
Bra012667	Ribosomal protein L23/L15e family protein	204	7	11	9	8	7	14	17	15	13
Bra010315	Pyridoxal-5'-phosphate-dependent enzyme family protein	525	0.1	0.1	0.1	10	0.1	0.1	2	3	3
Bra020549	glucoside glucohydrolase 2	262	20	21	14	30	16	15	35	25	41
Bra039557	UDP-glucosyl transferase 71B5	481	3	2	4	6	7	4	4	3	3
Bra010123	1-deoxy-D-xylulose 5-phosphate reductoisomerase	481	8	7	4	7	6	6	3	0.1	3
Bra040120	Ribose 5-phosphate isomerase, type A protein	275	28	23	23	30	34	30	34	18	13
Bra010774	photosystem I subunit K	130	0.1	4	0.1	2	0.1	0.1	5	4	5
Bra003644	glutathione S-transferase TAU 19	219	4	3	3	3	7	3	6	8	6
Bra016262	alpha-amylase-like 3	896	10	9	8	5	7	13	0.1	4	3
Bra011709	geranylgeranyl pyrophosphate synthase 1	363	5	4	6	4	0.1	3	0.1	0.1	2
Bra002368	calmodulin 5	149	6	7	6	0.1	11	0.1	6	3	6
Bra026314	Rhodanese/Cell cycle control phosphatase superfamily protein	226	5	5	4	7	11	5	12	7	9
Bra038265	RAB GTPase homolog 8A	376	16	9	13	10	12	12	18	13	18
Bra004455	thioredoxin family protein	361	2	4	0.1	5	10	7	13	7	8
Bra035525	glucose-6-phosphate dehydrogenase 1	570	0.1	0.1	4	3	4	6	4	2	3
Bra000692	S18 ribosomal protein	152	16	12	15	16	19	14	15	11	14
Bra037502	Aldolase-type TIM barrel family protein	382	4	5	5	0.1	0.1	3	3	2	0.1
Bra011057	Photosystem I reaction centre subunit IV / PsaE protein	143	18	20	23	21	19	16	18	20	25
Bra012292	proteasome beta subunit C1	204	2	3	0.1	8	11	7	7	3	4
Bra012005	NAD(P)-linked oxidoreductase superfamily protein	382	7	9	9	9	9	7	8	9	9
Bra040490	ATP synthase subunit 1	99	9	12	9	5	12	11	14	15	15
Bra018677	ascorbate peroxidase 1	305	20	13	15	31	32	26	30	19	29
Bra024616	Oxidoreductase, zinc-binding dehydrogenase family protein	385	48	45	39	64	66	61	42	47	51
Bra007220	eukaryotic translation initiation factor 3C	895	0.1	7	0.1	3	5	11	8	6	5
Bra028025	one-helix protein 2	172	5	5	3	5	6	4	3	0.1	2
Bra038389	RNA-binding (RRM/RBD/RNP motifs) family protein	285	5	7	4	6	4	8	4	2	0.1
Bra040987	Vesicle transport v-SNARE family protein	221	0.1	2	2	6	6	5	4	3	6
Bra036580	P-loop containing nucleoside triphosphate hydrolases superfamily protein	209	3	0.1	4	5	8	5	0.1	2	0.1
Bra034674	catalase 2	489	30	38	37	58	55	45	51	45	42
Bra035124	phosphoglycerate kinase	401	62	59	74	94	105	95	100	90	75
Bra016926	autoinhibited Ca(2+)-ATPase, isoform 4	1032	11	13	15	15	12	12	14	15	14
Bra022204	lipoamide dehydrogenase 2	504	5	0.1	0.1	0.1	0.1	7	14	8	11
Bra009263	glutamate dehydrogenase 2	411	3	0.1	0.1	0.1	5	0.1	10	6	4
Bra037156	dolichyl-diphosphooligosaccharide-protein glycosyltransferase 48kDa subunit family protein	435	3	0.1	3	6	9	7	9	9	8
Bra035392	glutamine synthetase 2	428	80	86	89	109	127	116	96	100	94
Bra031210	cold, circadian rhythm, and rna binding 2	168	12	12	6	13	12	12	7	8	8
Bra011645	GTP-binding 2	211	0.1	3	0.1	11	0.1	0.1	10	11	8
Bra022819	Heat shock protein 70 (Hsp 70) family protein	669	61	66	45	87	105	81	94	89	77
Bra039444	Metallopeptidase M24 family protein	696	2	0.1	3	7	11	5	5	7	5
Bra018543	glutathione S-transferase F3	213	2	2	9	6	36	9	18	13	12
Bra032659	SEC7-like guanine nucleotide exchange family protein	1752	4	4	3	0.1	2	2	2	4	3
Bra020809	NAD(P)-binding Rossmann-fold superfamily protein	395	13	10	11	10	14	10	13	15	17
Bra015315	NAD(P)-linked oxidoreductase superfamily protein	420	2	4	3	9	9	5	9	3	4
Bra033713	HAD superfamily, subfamily IIIB acid phosphatase	270	8	4	8	2	0.1	0.1	14	10	0.1
Bra001249	auxin-responsive family protein	255	0.1	3	0.1	3	5	4	0.1	0.1	2
Bra026087	NDH-dependent cyclic electron flow 1	459	3	2	2	0.1	0.1	2	0.1	0.1	2
Bra026399	small ubiquitin-like modifier 1	100	3	2	3	0.1	3	0.1	0.1	2	0.1
Bra028445	thioredoxin 2	133	3	3	3	2	3	0.1	5	4	6
Bra037112	Subtilase family protein	758	4	2	3	8	35	6	4	9	6
Bra035067	Curculin-like (mannose-binding) lectin family protein	454	3	4	3	10	6	6	8	4	9
Bra018619	ALBINA 1	756	5	6	5	0.1	2	3	0.1	4	0.1
Bra029025	flavodoxin-like quinone reductase 1	205	3	2	0.1	5	8	6	5	6	7
Bra006182	cyclophilin 20-2	257	4	7	7	15	18	10	15	5	8
Bra018941	myrosinase-binding protein 2	433	9	10	8	40	23	21	25	8	31
Bra038615	MA3 domain-containing protein	740	6	6	8	10	6	6	7	5	5
Bra021826	gamma subunit of Mt ATP synthase	321	8	13	7	23	20	14	28	12	16
Bra008747	peptide deformylase 1B	277	2	2	2	0.1	2	0.1	0.1	2	0.1
Bra005099	lipid transfer protein 2	118	11	19	8	12	3	11	14	21	27
Bra033655	regulatory particle triple-A ATPase 4A	399	4	3	0.1	9	9	10	17	7	6
Bra030303	fructose-bisphosphate aldolase 1	390	69	58	71	66	90	75	61	67	62
Bra000724	Tetratricopeptide repeat (TPR)-like superfamily protein	608	7	6	3	0.1	7	5	0.1	2	0.1
Bra014229	CLP protease proteolytic subunit 1	388	9	4	5	3	4	6	5	4	2
Bra028992	Dihydrolipoamide succinyltransferase	494	3	3	0.1	0.1	0.1	4	8	7	6
Bra001122	pathogenesis-related 4	140	0.1	0.1	2	4	5	0.1	9	4	6
Bra000996	unknown protein;	832	10	3	8	6	2	11	19	13	16
Bra017624	S-adenosyl-L-methionine-dependent methyltransferases superfamily protein	258	5	0.1	3	10	12	11	11	7	11
Bra021815	beta glucosidase 33	598	2	0.1	0.1	0.1	3	2	6	4	4
Bra029436	Double Clp-N motif protein	244	0.1	3	4	4	7	4	0.1	0.1	2
Bra015299	cytosolic ribosomal protein S15	152	3	6	0.1	13	11	12	7	0.1	0.1
Bra018654	lactoylglutathione lyase family protein / glyoxalase I family protein	237	3	2	3	6	5	4	4	4	5
Bra002177	NAD(P)-binding Rossmann-fold superfamily protein	410	4	7	10	3	7	7	2	5	0.1
Bra009841	Protein of unknown function, DUF642	367	17	23	22	23	21	15	36	18	28
Bra007142	Chalcone-flavanone isomerase family protein	251	2	0.1	0.1	3	0.1	3	7	5	4
Bra002139	glutamate dehydrogenase 1	411	0.1	3	4	8	6	10	12	6	11
Bra014309	myrosinase-binding protein 2	854	5	3	2	5	5	0.1	15	15	11
Bra038678	Dihydroneopterin aldolase	153	0.1	2	0.1	2	3	3	2	0.1	0.1
Bra000483	Histone superfamily protein	155	12	23	11	24	28	26	21	12	16
Bra013352	NAD(P)-binding Rossmann-fold superfamily protein	600	4	0.1	0.1	3	5	4	2	0.1	0.1
Bra032268	chorismate synthase, putative / 5-enolpyruvylshikimate-3-phosphate phospholyase, putative	438	4	0.1	0.1	4	8	9	2	2	0.1
Bra010665	Lipase/lipooxygenase, PLAT/LH2 family protein	178	7	2	2	5	4	4	7	9	8
Bra016503	dehydroascorbate reductase	210	0.1	3	0.1	0.1	10	0.1	13	7	5
Bra026092	Ribosomal protein L7Ae/L30e/S12e/Gadd45 family protein	120	7	10	5	11	18	13	11	10	9
Bra027728	general control non-repressible 3	762	2	0.1	0.1	0.1	2	0.1	2	3	3
Bra038815	SECY homolog 1	551	2	0.1	2	4	2	6	2	0.1	0.1
Bra018610	Chloroplast J-like domain 1	287	3	3	0.1	0.1	0.1	0.1	2	0.1	2
Bra020098	Ribosomal protein S8e family protein	226	34	37	25	36	42	33	49	40	46
Bra037462	Domain of unknown function (DUF1995)	317	0.1	2	3	0.1	0.1	0.1	3	0.1	2
Bra007315	beta-1,3-glucanase 2	329	0.1	0.1	0.1	0.1	15	0.1	3	2	2
Bra005522	peroxisomal 3-ketoacyl-CoA thiolase 3	462	4	2	14	18	9	6	37	11	23
Bra015380	ethylene-forming enzyme	321	2	3	3	0.1	0.1	2	4	0.1	0.1
Bra021465	6-phosphogluconate dehydrogenase family protein	486	6	0.1	6	15	14	13	19	15	20
Bra010011	GDP-D-mannose 3',5'-epimerase	379	16	27	27	21	28	24	21	16	22
Bra011796	serine transhydroxymethyltransferase 1	517	45	53	63	77	84	101	84	76	69
Bra007797	UDP-sugar pyrophosphorylase	618	2	0.1	2	0.1	0.1	0.1	3	3	0.1
Bra004177	CLP protease proteolytic subunit 3	313	5	5	3	5	6	6	3	4	4
Bra018845	Prolyl oligopeptidase family protein	710	0.1	0.1	2	0.1	9	0.1	5	10	4
Bra000454	thioredoxin family protein	362	3	0.1	4	7	11	9	9	8	7
Bra030896	ARM repeat superfamily protein	1681	2	3	0.1	0.1	0.1	0.1	3	4	0.1
Bra011350	Cytochrome bd ubiquinol oxidase, 14kDa subunit	104	7	0.1	5	0.1	0.1	0.1	0.1	2	0.1
Bra015574	ribosomal protein L4	283	17	10	16	16	18	19	15	12	11
Bra030127	Alba DNA/RNA-binding protein	130	0.1	6	4	0.1	0.1	0.1	0.1	2	0.1
Bra026409	PLC-like phosphodiesterase family protein	757	4	8	6	13	9	10	8	7	7
Bra016127	Peroxidase superfamily protein	362	4	6	0.1	17	9	10	16	11	14
Bra028774	clathrin adaptor complexes medium subunit family protein	524	5	0.1	0.1	7	7	8	0.1	5	0.1
Bra000953	Ribosomal L5P family protein	264	11	14	11	10	15	11	15	7	10
Bra018876	Ankyrin repeat family protein	176	4	3	3	3	0.1	3	0.1	2	0.1
Bra012980	Ribosomal protein S19e family protein	143	0.1	8	6	0.1	0.1	0.1	8	0.1	6
Bra025111	Molybdenum cofactor sulfurase family protein	308	2	4	0.1	0.1	0.1	0.1	2	0.1	3
Bra025610	ferredoxin thioredoxin reductase catalytic beta chain family protein	143	4	3	0.1	0.1	0.1	0.1	3	0.1	4
Bra039925	Protein of unknown function (DUF1012)	809	2	0.1	0.1	4	2	3	0.1	0.1	2
Bra031185	unknown protein;	332	0.1	4	3	3	2	0.1	0.1	0.1	0.1
Bra039118	PsbQ-like 1	223	0.1	4	5	0.1	0.1	0.1	0.1	3	2
Bra034663	PLC-like phosphodiesterases superfamily protein	318	2	0.1	3	0.1	0.1	0.1	6	0.1	4
Bra034523	Copper amine oxidase family protein	712	0.1	3	0.1	2	5	4	0.1	0.1	2
Bra013394	Pectinacetylesterase family protein	391	6	7	0.1	0.1	0.1	0.1	17	13	0.1
Bra006200	delta subunit of Mt ATP synthase	244	7	5	7	11	9	11	10	6	6
Bra025534	ribosomal protein large subunit 27	198	6	6	6	4	4	5	4	3	0.1
Bra009210	ubiquitin-specific protease 12	1100	4	0.1	3	0.1	0.1	0.1	7	15	0.1
Bra003211	2-oxoglutarate dehydrogenase, E1 component	1016	5	0.1	6	0.1	0.1	0.1	10	14	0.1
Bra028863	Glutathione S-transferase family protein	461	0.1	2	3	5	10	4	9	6	3
Bra008128	Ribosomal protein L6 family protein	233	8	13	0.1	0.1	0.1	0.1	16	14	0.1
Bra001415	Thioredoxin superfamily protein	307	37	42	57	79	80	61	77	66	55
Bra028781	ACT domain-containing protein	351	0.1	3	3	0.1	0.1	2	3	5	3
Bra010712	vacuolar proton ATPase A3	819	11	8	6	16	10	13	14	18	16
Bra020079	regulatory particle triple-A ATPase 6A	721	20	21	17	39	31	26	32	21	23
Bra020139	Glycosyl hydrolase family protein	638	24	34	26	50	59	34	41	35	33
Bra017210	PHE ammonia lyase 1	722	4	7	0.1	5	9	7	0.1	3	0.1
Bra005371	AICARFT/IMPCHase bienzyme family protein	756	3	2	3	2	5	7	2	0.1	2
Bra028761	Peroxidase superfamily protein	324	2	0.1	3	2	2	0.1	0.1	0.1	0.1
Bra038453	pentatricopeptide (PPR) repeat-containing protein	697	4	6	0.1	0.1	2	3	0.1	0.1	0.1
Bra024311	beta-D-xylosidase 4	780	6	0.1	2	0.1	0.1	0.1	6	6	0.1
Bra028809	chloroplast signal recognition particle 54 kDa subunit	564	5	3	5	3	5	7	0.1	3	2
Bra022931	heat shock protein 60-2	557	20	15	0.1	0.1	0.1	0.1	32	22	0.1
Bra024339	ABC2 homolog 13	752	6	6	6	0.1	0.1	5	3	5	0.1
Bra000914	S-adenosylmethionine synthetase 2	393	18	26	14	0.1	33	0.1	0.1	12	0.1
Bra013582	SKU5 similar 4	541	8	10	8	14	13	13	15	10	13
Bra012530	Glutathione S-transferase family protein	356	2	0.1	4	0.1	0.1	2	5	3	3
Bra011916	S-adenosyl-L-methionine-dependent methyltransferases superfamily protein	311	2	2	0.1	0.1	0.1	0.1	0.1	2	2
Bra018715	Peptidase M1 family protein	954	9	17	6	14	15	17	24	20	17
Bra020388	phototropin 2	881	7	4	3	0.1	0.1	6	4	0.1	0.1
Bra021912	NAD(P)-binding Rossmann-fold superfamily protein	289	4	5	6	2	0.1	5	4	7	7
Bra000280	Phosphoribosyltransferase family protein	338	0.1	4	3	0.1	0.1	0.1	0.1	4	4
Bra001028	Ribosomal protein S19e family protein	143	8	0.1	0.1	11	13	11	0.1	9	0.1
Bra011902	Peptidase M20/M25/M40 family protein	432	2	0.1	2	4	3	5	7	3	5
Bra038418	photosystem I subunit F	213	57	60	78	74	77	63	74	69	63
Bra004460	Prolyl oligopeptidase family protein	946	8	3	9	4	3	4	5	14	6
Bra027005	nucleotide-rhamnose synthase/epimerase-reductase	297	7	7	6	10	7	7	8	4	6
Bra015397	Ribosomal protein L6 family	223	16	11	12	11	13	14	15	14	13
Bra017503	Chlorophyll A-B binding family protein	261	3	6	3	3	4	4	3	0.1	2
Bra005784	Nucleic acid-binding, OB-fold-like protein	64	6	6	0.1	7	5	0.1	0.1	0.1	0.1
Bra033753	RAB GTPase homolog E1B	474	93	114	93	113	115	118	143	120	107
Bra002954	tryptophan synthase beta-subunit 1	465	0.1	4	0.1	6	6	4	0.1	0.1	4
Bra027022	stress-inducible protein, putative	567	10	9	6	7	3	9	3	8	3
Bra003437	ribosomal protein S27	84	3	4	0.1	0.1	0.1	0.1	0.1	3	4
Bra034728	short-chain dehydrogenase-reductase B	294	0.1	0.1	2	2	0.1	2	5	3	3
Bra000112	Acyl-CoA N-acyltransferases (NAT) superfamily protein	234	0.1	2	2	2	4	3	2	0.1	0.1
Bra035244	PLC-like phosphodiesterase family protein	758	7	12	12	22	23	15	15	11	18
Bra011946	beta-galactosidase 8	845	2	0.1	3	7	7	4	8	3	6
Bra018180	alpha-glucan phosphorylase 2	841	16	18	14	21	32	44	25	24	23
Bra013839	arginosuccinate synthase family	499	5	0.1	0.1	16	14	11	13	0.1	6
Bra034864	Clathrin, heavy chain	1488	33	45	25	47	61	52	56	58	53
Bra020115	germin 3	212	2	2	2	4	4	4	2	3	4
Bra020806	BR-signaling kinase 1	507	0.1	0.1	5	0.1	0.1	3	4	6	4
Bra013013	calcium sensing receptor	387	57	63	67	69	66	75	69	63	68
Bra003758	ornithine carbamoyltransferase	377	4	3	4	2	2	3	0.1	2	2
Bra038368	NAD(P)-binding Rossmann-fold superfamily protein	322	2	2	2	0.1	0.1	2	3	0.1	0.1
Bra010432	Transducin/WD40 repeat-like superfamily protein	1131	3	2	0.1	0.1	2	3	0.1	0.1	0.1
Bra021214	Adenine nucleotide alpha hydrolases-like superfamily protein	163	7	5	7	11	13	5	12	12	14
Bra020810	isocitrate dehydrogenase 1	363	5	5	0.1	0.1	0.1	0.1	0.1	12	18
Bra022775	Pleckstrin homology (PH) domain superfamily protein	221	4	2	0.1	0.1	2	3	0.1	0.1	0.1
Bra019572	FASCICLIN-like arabinogalactan 2	399	0.1	6	4	11	9	10	0.1	0.1	6
Bra025210	tonoplast intrinsic protein 2	253	0.1	46	30	0.1	0.1	0.1	0.1	46	35
Bra010622	serine transhydroxymethyltransferase 1	517	30	46	49	61	70	78	70	58	51
Bra028901	Aldolase-type TIM barrel family protein	309	0.1	16	13	10	0.1	13	0.1	0.1	0.1
Bra039144	Pyridoxal phosphate (PLP)-dependent transferases superfamily protein	530	3	0.1	5	0.1	2	4	0.1	0.1	0.1
Bra007337	N-acetyl-l-glutamate kinase	343	2	7	4	8	11	6	6	2	0.1
Bra033317	Flavin containing amine oxidoreductase family	536	4	7	11	12	13	13	10	6	7
Bra010329	Ribosomal L28e protein family	143	10	0.1	7	0.1	0.1	0.1	0.1	6	9
Bra035826	translocase of the outer mitochondrial membrane 40	309	2	0.1	0.1	3	0.1	0.1	4	2	3
Bra025940	basic transcription factor 3	166	0.1	4	2	6	7	3	0.1	0.1	3
Bra039224	Uncharacterised BCR, YbaB family COG0718	183	8	11	9	9	10	7	8	12	7
Bra032829	adenine phosphoribosyl transferase 1	185	4	0.1	4	10	15	7	15	6	7
Bra026752	prephenate dehydrogenase family protein	348	2	0.1	2	2	0.1	2	0.1	0.1	0.1
Bra025359	ATP binding cassette subfamily B19	1252	3	5	0.1	0.1	0.1	2	0.1	0.1	0.1
Bra021450	DEGP protease 2	605	8	10	7	13	12	10	7	0.1	5
Bra011522	4-hydroxy-3-methylbut-2-enyl diphosphate reductase	462	3	4	0.1	2	0.1	4	0.1	0.1	0.1
Bra002290	Ribosomal protein S8e family protein	227	31	45	27	36	39	32	44	42	45
Bra017279	Ribosomal protein S5/Elongation factor G/III/V family protein	878	0.1	109	84	0.1	175	155	0.1	0.1	0.1
Bra006913	unknown protein;	139	2	3	0.1	0.1	7	3	0.1	0.1	0.1
Bra007087	glutathione reductase	563	3	4	7	7	8	8	12	7	7
Bra009317	unknown protein;	130	2	3	3	0.1	0.1	3	0.1	3	0.1
Bra031534	photosystem II subunit P-1	263	79	59	93	89	81	76	68	82	57
Bra029922	Clp ATPase	928	74	96	0.1	0.1	115	100	0.1	0.1	0.1
Bra034141	alpha-L-arabinofuranosidase 1	674	0.1	0.1	3	6	7	0.1	6	8	8
Bra002665	unknown protein;	212	5	9	7	4	5	4	4	4	0.1
Bra005865	ethylene-dependent gravitropism-deficient and yellow-green-like 2	529	2	0.1	3	3	0.1	3	0.1	0.1	0.1
Bra040049	phospholipase C 2	542	2	0.1	0.1	0.1	0.1	0.1	8	0.1	5
Bra024367	Ribosomal L29 family protein	169	7	13	9	9	6	0.1	8	0.1	0.1
Bra006903	RNA-binding (RRM/RBD/RNP motifs) family protein	251	8	8	6	5	9	6	5	7	7
Bra011514	1,2-alpha-L-fucosidases	796	0.1	2	0.1	2	3	0.1	6	2	4
Bra013193	threonyl-tRNA synthetase, putative / threonine--tRNA ligase, putative	652	4	0.1	3	3	0.1	5	0.1	0.1	0.1
Bra019192	magnesium-protoporphyrin IX methyltransferase	135	7	6	6	5	2	7	7	5	5
Bra008470	plastid transcriptionally active 17	455	4	10	7	5	13	8	5	4	5
Bra017686	ascorbate peroxidase 3	287	3	3	3	3	0.1	0.1	0.1	2	2
Bra029267	Plant invertase/pectin methylesterase inhibitor superfamily protein	201	6	4	5	7	4	5	4	5	3
Bra000351	Citrate synthase family protein	444	5	0.1	0.1	15	21	18	0.1	16	17
Bra010843	Alba DNA/RNA-binding protein	130	3	6	0.1	4	4	3	2	0.1	0.1
Bra040069	pantothenate kinase 2	899	3	3	3	2	3	4	6	4	3
Bra014529	O-acetylserine (thiol) lyase isoform C	422	5	8	0.1	21	18	14	14	9	13
Bra000791	tRNA synthetase class I (I, L, M and V) family protein	956	5	6	3	2	0.1	4	0.1	4	0.1
Bra006590	molybdopterin biosynthesis CNX1 protein / molybdenum cofactor biosynthesis enzyme CNX1 (CNX1)	672	3	0.1	2	0.1	0.1	2	3	3	3
Bra008769	Rubisco methyltransferase family protein	516	4	3	6	6	5	10	6	3	2
Bra013209	Aldolase-type TIM barrel family protein	402	0.1	2	0.1	6	4	4	4	0.1	4
Bra004319	alpha-xylosidase 1	926	0.1	6	0.1	11	7	0.1	15	11	12
Bra029627	FAD-dependent oxidoreductase family protein	370	2	2	0.1	0.1	0.1	0.1	2	0.1	0.1
Bra008616	Alpha-1,4-glucan-protein synthase family protein	348	4	0.1	0.1	0.1	2	0.1	3	3	3
Bra025899	methylthioalkylmalate synthase-like 4	415	0.1	0.1	6	3	7	5	3	0.1	0.1
Bra009404	clathrin adaptor complexes medium subunit family protein	609	10	9	5	13	15	16	13	10	11
Bra033846	phospholipid/glycerol acyltransferase family protein	440	4	2	0.1	0.1	2	0.1	0.1	0.1	0.1
Bra029067	NADH-dependent glutamate synthase 1	2199	11	11	6	4	7	9	7	11	10
Bra029589	Mevalonate/galactokinase family protein	496	3	3	5	6	8	6	10	8	4
Bra037091	GTP-binding protein-related	390	0.1	3	3	6	8	7	7	7	3
Bra003526	lipoxygenase 2	904	100	146	127	184	204	173	184	138	154
Bra000871	vacuolar ATPase subunit F family protein	128	5	4	5	9	13	6	7	12	8
Bra016522	photosystem I light harvesting complex gene 6	266	0.1	2	3	0.1	0.1	0.1	0.1	2	0.1
Bra018062	Haloacid dehalogenase-like hydrolase (HAD) superfamily protein	321	7	0.1	7	7	11	12	6	0.1	0.1
Bra035168	HOPW1-1-interacting 1	451	5	7	0.1	9	9	6	5	0.1	0.1
Bra010412	Ribosomal protein L14	134	18	14	12	8	18	8	15	20	9
Bra030763	calreticulin 1b	660	12	10	0.1	30	32	18	31	27	24
Bra012616	Ribosomal protein L32e	133	16	21	12	14	10	17	15	18	17
Bra036911	2Fe-2S ferredoxin-like superfamily protein	151	0.1	4	2	0.1	0.1	2	0.1	0.1	0.1
Bra001036	Proteasome component (PCI) domain protein	415	2	3	0.1	6	4	7	6	3	5
Bra006572	chaperonin 20	253	27	31	25	32	20	28	27	31	25
Bra031583	endomembrane-type CA-ATPase 4	964	0.1	3	2	0.1	0.1	0.1	0.1	0.1	2
Bra009583	heat shock cognate protein 70-1	602	117	116	89	154	163	153	163	155	140
Bra027821	RNA-binding (RRM/RBD/RNP motifs) family protein	254	2	3	0.1	0.1	0.1	0.1	0.1	2	0.1
Bra035563	trigger factor type chaperone family protein	545	21	17	9	19	28	26	17	12	14
Bra032612	translocon at the outer envelope membrane of chloroplasts 33	297	0.1	2	0.1	3	2	2	0.1	2	0.1
Bra020586	MIRO-related GTP-ase 1	645	0.1	0.1	2	3	0.1	2	5	3	3
Bra001453	basic chitinase	242	0.1	4	0.1	14	16	3	9	0.1	3
Bra009609	unknown protein;	132	2	0.1	0.1	0.1	0.1	0.1	0.1	7	7
Bra002370	Chaperone DnaJ-domain superfamily protein	217	4	4	4	2	0.1	2	0.1	5	0.1
Bra029986	casein kinase II, alpha chain 2	329	2	4	2	0.1	0.1	2	0.1	3	2
Bra000339	Late embryogenesis abundant protein, group 2	777	10	0.1	0.1	0.1	22	0.1	20	12	15
Bra016020	Low PSII Accumulation 3	356	6	5	10	11	9	12	10	5	5
Bra009334	hydroxymethylbilane synthase	382	15	21	15	0.1	15	11	15	0.1	0.1
Bra005575	FUNCTIONS IN: molecular_function unknown; INVOLVED IN: response to cadmium ion; LOCATED IN: plasma membrane; EXPRESSED IN: 25 plant structures; EXPRESSED DURING: 13 growth stages; CONTAINS InterPro DOMAIN/s: Prefoldin (InterPro:IPR009053); BEST Arabidopsis thaliana protein match is: unknown protein (TAIR:AT1G05320.3); Has 470429 Blast hits to 168274 proteins in 4282 species: Archae - 6896; Bacter…	1424	15	5	9	5	0.1	4	0.1	9	0.1
Bra027150	enoyl-CoA hydratase/isomerase D	338	2	0.1	3	0.1	0.1	0.1	0.1	2	0.1
Bra011985	chaperonin-60alpha	585	88	115	94	138	148	161	131	129	82
Bra028155	pfkB-like carbohydrate kinase family protein	309	4	4	2	3	3	3	3	3	2
Bra029481	fibrillin	318	7	0.1	13	25	25	14	27	20	28
Bra014755	PsbP-like protein 1	229	13	13	16	19	16	16	22	17	18
Bra006395	UDP-glucose pyrophosphorylase 2	470	11	0.1	11	22	28	23	32	22	30
Bra016736	S-adenosyl-L-methionine-dependent methyltransferases superfamily protein	338	4	4	3	3	2	5	2	3	0.1
Bra019558	alpha/beta-Hydrolases superfamily protein	323	4	6	5	5	7	8	9	7	8
Bra036934	RAB GTPASE HOMOLOG B18	212	2	0.1	0.1	0.1	0.1	0.1	7	0.1	3
Bra033452	tetratricopeptide repeat (TPR)-containing protein	1381	0.1	4	0.1	2	0.1	0.1	2	7	2
Bra007120	PDI-like 1-3	579	0.1	2	4	4	7	8	6	6	4
Bra037010	Tic22-like family protein	651	2	0.1	3	2	0.1	0.1	0.1	0.1	0.1
Bra000238	villin 2	945	10	0.1	0.1	11	0.1	14	18	26	18
Bra015924	purine biosynthesis 4	1516	12	14	10	16	15	19	12	15	8
Bra026733	unknown protein;	308	16	17	17	15	21	20	18	14	18
Bra019748	Aldolase superfamily protein	409	5	7	14	6	9	9	7	4	6
Bra011599	isocitrate dehydrogenase 1	367	0.1	0.1	11	14	13	14	17	0.1	0.1
Bra013425	aspartate kinase-homoserine dehydrogenase ii	923	15	17	15	14	17	21	14	18	7
Bra038088	beta-amylase 5	498	5	7	0.1	22	16	9	21	6	16
Bra007404	ketol-acid reductoisomerase	586	31	44	26	29	39	37	22	18	0.1
Bra011878	vacuolar proton ATPase A3	748	8	0.1	0.1	0.1	0.1	14	10	11	12
Bra027454	INVOLVED IN: biological_process unknown; LOCATED IN: thylakoid, chloroplast thylakoid membrane, chloroplast; EXPRESSED IN: 22 plant structures; EXPRESSED DURING: 13 growth stages; CONTAINS InterPro DOMAIN/s: Twin-arginine translocation pathway, signal sequence (InterPro:IPR006311); Has 30201 Blast hits to 17322 proteins in 780 species: Archae - 12; Bacteria - 1396; Metazoa - 17338; Fungi - 3422; …	224	3	5	4	5	5	3	2	0.1	4
Bra006503	rhodanese-like domain-containing protein / PPIC-type PPIASE domain-containing protein	297	2	3	0.1	0.1	0.1	2	0.1	0.1	0.1
Bra029372	ferredoxin/thioredoxin reductase subunit A (variable subunit) 1	155	2	2	3	2	3	0.1	0.1	0.1	2
Bra019099	calcineurin B-like 3	449	0.1	2	2	2	0.1	0.1	0.1	0.1	0.1
Bra020354	Undecaprenyl pyrophosphate synthetase family protein	306	0.1	2	2	0.1	0.1	0.1	0.1	0.1	2
Bra039070	photosystem II light harvesting complex gene 2.3	265	131	135	251	135	82	172	181	166	111
Bra012223	ATPase, V1 complex, subunit B protein	471	0.1	26	0.1	43	51	0.1	67	51	55
Bra002799	Class II aminoacyl-tRNA and biotin synthetases superfamily protein	575	6	6	4	7	0.1	3	8	11	7
Bra015073	glyoxylate reductase 1	289	5	7	6	9	9	13	9	10	8
Bra035235	Peroxidase superfamily protein	326	0.1	0.1	2	5	2	3	2	2	0.1
Bra022751	CLPC homologue 1	929	110	132	104	145	177	155	166	170	155
Bra000403	phosphomannomutase	246	3	6	0.1	5	5	6	4	0.1	0.1
Bra036092	Transducin/WD40 repeat-like superfamily protein	1556	2	0.1	2	3	4	4	2	8	7
Bra028744	NAD(P)-binding Rossmann-fold superfamily protein	263	4	3	4	5	9	4	8	5	9
Bra032019	Zinc-binding dehydrogenase family protein	336	5	7	10	11	13	6	12	15	13
Bra026329	ARM repeat superfamily protein	1049	2	2	0.1	2	0.1	0.1	0.1	0.1	0.1
Bra024234	unknown protein;	161	2	2	0.1	2	0.1	0.1	0.1	0.1	0.1
Bra007695	multidrug resistance-associated protein 10	1537	2	0.1	0.1	2	0.1	2	2	4	4
Bra032668	mago nashi family protein	266	4	3	3	6	0.1	0.1	4	0.1	0.1
Bra001019	unknown protein;	53	2	2	0.1	0.1	0.1	0.1	0.1	0.1	2
Bra030366	Transducin/WD40 repeat-like superfamily protein	330	2	2	0.1	0.1	0.1	0.1	0.1	0.1	2
Bra000773	Cupredoxin superfamily protein	585	17	21	19	20	31	20	20	16	20
Bra033574	rotamase CYP 1	172	7	0.1	0.1	18	11	7	18	0.1	0.1
Bra006850	beta-galactosidase 4	722	0.1	0.1	2	0.1	0.1	0.1	6	0.1	2
Bra023336	NADP-malic enzyme 2	588	0.1	0.1	0.1	33	41	0.1	27	0.1	23
Bra016672	FAD/NAD(P)-binding oxidoreductase	300	20	9	14	11	14	13	11	12	11
Bra036818	VPS35 homolog C	793	0.1	2	0.1	2	4	6	3	3	0.1
Bra030284	cold, circadian rhythm, and rna binding 2	168	0.1	7	3	9	7	5	0.1	5	0.1
Bra029651	2Fe-2S ferredoxin-like superfamily protein	154	0.1	2	0.1	0.1	0.1	0.1	2	5	0.1
Bra030025	NAD(P)-binding Rossmann-fold superfamily protein	319	15	16	0.1	0.1	0.1	0.1	0.1	12	0.1
Bra040594	Class I glutamine amidotransferase-like superfamily protein	388	0.1	0.1	4	6	4	0.1	9	5	6
Bra011734	accelerated cell death 2 (ACD2)	490	3	0.1	3	0.1	0.1	0.1	0.1	3	0.1
Bra022529	Transketolase family protein	366	0.1	9	0.1	0.1	0.1	0.1	17	16	0.1
Bra039865	GTP binding	394	5	6	0.1	12	12	11	17	10	7
Bra007519	Zinc-binding ribosomal protein family protein	92	9	9	0.1	0.1	0.1	0.1	10	0.1	0.1
Bra016835	plastid developmental protein DAG, putative	232	0.1	2	0.1	0.1	8	3	0.1	0.1	0.1
Bra009004	L-Aspartase-like family protein	940	3	2	2	6	5	5	4	0.1	2
Bra025804	ATPase, V1 complex, subunit B protein	404	0.1	0.1	0.1	49	0.1	59	72	0.1	57
Bra000663	ascorbate peroxidase 4	348	22	15	22	31	33	26	31	17	17
Bra027800	Protein kinase protein with tetratricopeptide repeat domain	485	0.1	0.1	2	0.1	0.1	4	2	3	4
Bra005390	FAD-binding Berberine family protein	539	0.1	0.1	0.1	3	4	0.1	12	0.1	6
Bra028843	isocitrate dehydrogenase V	595	0.1	0.1	0.1	15	21	0.1	16	0.1	11
Bra013674	osmotin 34	231	7	6	13	18	35	11	15	14	13
Bra014946	Plastid-lipid associated protein PAP / fibrillin family protein	277	9	5	13	13	17	11	17	15	18
Bra020605	cysteine synthase D2	434	15	12	13	18	13	16	21	16	21
Bra030286	acetyl-CoA synthetase	746	2	0.1	6	4	7	5	8	6	14
Bra035105	nuclear pore anchor	2044	2	4	0.1	0.1	0.1	0.1	0.1	3	0.1
Bra013678	cysteine-rich RLK (RECEPTOR-like protein kinase) 10	668	3	0.1	0.1	2	3	3	0.1	0.1	2
Bra007589	Remorin family protein	194	2	3	6	8	0.1	6	0.1	2	0.1
Bra038942	Cyclophilin-like peptidyl-prolyl cis-trans isomerase family protein	281	5	0.1	0.1	4	3	2	3	2	3
Bra010818	Metallo-hydrolase/oxidoreductase superfamily protein	351	5	4	3	2	7	3	3	3	2
Bra027506	Aluminium induced protein with YGL and LRDR motifs	251	6	10	11	7	11	5	11	8	6
Bra023418	Ribosomal protein L10 family protein	107	10	4	4	19	0.1	0.1	0.1	0.1	3
Bra005514	heat shock protein 60-2	559	22	20	19	23	32	29	40	24	33
Bra003126	phenylalanine ammonia-lyase 2	707	4	0.1	0.1	6	7	5	0.1	0.1	8
Bra039115	cyclophilin 38	428	11	14	15	17	10	12	17	12	13
Bra012004	60S acidic ribosomal protein family	113	0.1	4	2	6	8	5	5	4	3
Bra006111	Glycosyl hydrolases family 31 protein	891	0.1	0.1	0.1	0.1	2	2	4	5	0.1
Bra024049	Translation initiation factor 3 protein	281	5	2	5	2	3	3	2	0.1	3
Bra007675	Carbohydrate-binding-like fold	1197	5	2	0.1	7	9	5	5	5	7
Bra035247	Nucleic acid-binding, OB-fold-like protein	141	0.1	3	0.1	3	2	2	2	0.1	0.1
Bra035669	63 kDa inner membrane family protein	447	3	3	0.1	0.1	0.1	3	0.1	0.1	0.1
Bra031018	FKBP-like peptidyl-prolyl cis-trans isomerase family protein	252	6	5	5	2	2	7	2	4	5
Bra008234	Alba DNA/RNA-binding protein	334	0.1	2	0.1	0.1	0.1	0.1	3	0.1	2
Bra008824	Ribosomal protein L10 family protein	218	0.1	0.1	0.1	0.1	15	10	11	4	0.1
Bra019206	arginosuccinate synthase family	517	0.1	6	9	0.1	0.1	0.1	0.1	8	0.1
Bra016073	Kunitz family trypsin and protease inhibitor protein	223	0.1	0.1	0.1	3	4	0.1	12	0.1	4
Bra014636	beta-1,3-glucanase 2	309	4	4	8	7	37	5	5	3	4
Bra026200	valyl-tRNA synthetase / valine--tRNA ligase (VALRS)	1107	3	0.1	0.1	0.1	0.1	0.1	4	0.1	5
Bra001788	endoribonuclease L-PSP family protein	179	10	0.1	10	13	12	10	9	0.1	0.1
Bra031187	vacuolar proton ATPase A2	821	8	6	0.1	14	8	12	10	0.1	0.1
Bra014436	cysteine synthase C1	368	17	0.1	17	22	23	18	16	0.1	0.1
Bra027386	Dihydrolipoamide acetyltransferase, long form protein	500	0.1	0.1	4	0.1	6	7	6	6	10
Bra038621	nucleoside diphosphate kinase 2	232	7	7	11	0.1	8	5	0.1	9	0.1
Bra040018	Small nuclear ribonucleoprotein family protein	112	0.1	3	0.1	5	2	0.1	4	5	4
Bra039018	profilin 1	131	11	12	0.1	0.1	0.1	10	0.1	0.1	0.1
Bra034616	D-3-phosphoglycerate dehydrogenase	601	22	20	12	33	31	23	0.1	9	19
Bra033424	Eukaryotic aspartyl protease family protein	473	0.1	0.1	2	0.1	0.1	0.1	3	0.1	2
Bra029933	peroxidase CB	349	0.1	0.1	0.1	4	6	0.1	3	0.1	2
Bra021508	Glycosyl hydrolases family 32 protein	579	2	0.1	0.1	0.1	0.1	0.1	3	2	0.1
Bra037196	Bifunctional inhibitor/lipid-transfer protein/seed storage 2S albumin superfamily protein	254	16	13	16	31	26	19	27	21	17
Bra037607	Pheophorbide a oxygenase family protein with Rieske [2Fe-2S] domain	536	0.1	0.1	0.1	0.1	2	0.1	7	3	0.1
Bra029693	Protein of unknown function, DUF642	365	9	9	6	15	18	10	14	9	9
Bra008606	unknown protein;	162	0.1	2	0.1	0.1	0.1	0.1	2	0.1	3
Bra001156	ribosomal protein L18	187	0.1	0.1	0.1	10	0.1	8	12	0.1	11
Bra000149	Glucose-1-phosphate adenylyltransferase family protein	401	0.1	3	2	3	0.1	0.1	0.1	0.1	0.1
Bra004389	S-adenosyl-L-methionine-dependent methyltransferases superfamily protein	310	0.1	0.1	0.1	4	8	0.1	2	4	0.1
Bra014743	triosephosphate isomerase	254	0.1	47	0.1	0.1	0.1	0.1	90	69	0.1
Bra000481	Histone superfamily protein	103	29	44	32	30	29	38	33	39	47
Bra023597	rubredoxin family protein	271	18	12	23	17	14	12	12	17	19
Bra030660	photosystem II subunit P-1	261	86	65	107	99	89	89	84	91	62
Bra036910	O-acetylserine (thiol) lyase (OAS-TL) isoform A1	319	15	20	18	24	26	20	33	20	27
Bra020782	peroxiredoxin IIF	201	2	4	5	8	7	6	10	4	9
Bra005998	51 kDa subunit of complex I	407	0.1	0.1	2	4	5	0.1	4	4	3
Bra027688	ubiquitin-conjugating enzyme 28	111	2	0.1	0.1	4	3	0.1	0.1	0.1	0.1
Bra028057	2-oxoacid dehydrogenases acyltransferase family protein	455	8	13	8	9	10	11	7	10	8
Bra013899	Cleavage/polyadenylation specificity factor, 25kDa subunit	200	0.1	2	0.1	0.1	0.1	3	2	3	2
Bra014437	plasma membrane intrinsic protein 1B	286	29	36	0.1	0.1	0.1	0.1	0.1	0.1	30
Bra012127	zeaxanthin epoxidase (ZEP) (ABA1)	668	8	11	10	10	12	8	10	7	11
Bra004792	HARMLESS TO OZONE LAYER 1	226	0.1	0.1	0.1	5	0.1	4	8	0.1	6
Bra018479	Cupredoxin superfamily protein	586	20	26	26	28	40	25	29	19	24
Bra007235	Melibiase family protein	429	0.1	0.1	0.1	5	4	0.1	3	0.1	5
Bra014841	high cyclic electron flow 1	412	41	43	53	55	62	0.1	43	0.1	0.1
Bra038784	ribophorin II (RPN2) family protein	760	7	6	3	4	0.1	4	6	6	5
Bra011773	Acetamidase/Formamidase family protein	452	0.1	4	5	8	11	6	8	10	7
Bra010746	Patched family protein	1268	0.1	0.1	3	3	2	0.1	3	6	3
Bra012596	L-Aspartase-like family protein	531	4	4	3	7	7	6	5	0.1	3
Bra018954	FUNCTIONS IN: molecular_function unknown; INVOLVED IN: biological_process unknown; LOCATED IN: chloroplast thylakoid membrane, chloroplast; EXPRESSED IN: 23 plant structures; EXPRESSED DURING: 13 growth stages; BEST Arabidopsis thaliana protein match is: photosystem I P subunit (TAIR:AT2G46820.2); Has 291 Blast hits to 291 proteins in 50 species: Archae - 0; Bacteria - 90; Metazoa - 0; Fungi - 0;…	145	0.1	4	0.1	5	8	4	3	0.1	4
Bra014633	eukaryotic translation initiation factor 3E	441	0.1	5	0.1	0.1	11	8	0.1	0.1	0.1
Bra039025	hexokinase 1	500	4	0.1	0.1	11	9	0.1	9	9	6
Bra015981	TRAF-like family protein	382	3	0.1	4	4	5	4	11	6	7
Bra030504	nuclear encoded CLP protease 5	299	3	0.1	4	6	6	7	0.1	6	0.1
Bra039488	cofactor assembly, complex C (B6F)	180	0.1	0.1	0.1	3	2	0.1	2	2	0.1
Bra029577	damaged DNA binding protein 1A	1086	0.1	2	0.1	0.1	5	3	3	3	5
Bra012079	Galactose mutarotase-like superfamily protein	489	0.1	0.1	2	3	3	0.1	0.1	0.1	0.1
Bra004743	Aconitase/3-isopropylmalate dehydratase protein	252	4	2	2	2	2	3	2	2	0.1
Bra009133	RP non-ATPase subunit 8A	308	6	0.1	0.1	0.1	0.1	0.1	7	8	0.1
Bra014814	uridine 5'-monophosphate synthase / UMP synthase (PYRE-F) (UMPS)	474	0.1	0.1	0.1	4	0.1	4	4	4	0.1
Bra019543	Haloacid dehalogenase-like hydrolase (HAD) superfamily protein	234	0.1	4	0.1	0.1	0.1	0.1	0.1	5	8
Bra018137	malate dehydrogenase	402	12	13	10	16	21	17	16	17	14
Bra016818	starch synthase 3	1313	0.1	2	2	0.1	0.1	0.1	0.1	3	0.1
Bra029561	AMP-dependent synthetase and ligase family protein	542	0.1	0.1	0.1	5	2	0.1	9	0.1	3
Bra021556	Aldolase-type TIM barrel family protein	367	93	109	108	146	125	136	125	115	108
Bra037525	Protein of unknown function (DUF1350)	431	0.1	0.1	0.1	4	0.1	3	6	3	0.1
Bra030727	calreticulin 3	389	0.1	2	0.1	0.1	0.1	0.1	2	0.1	2
Bra011792	phosphoenolpyruvate carboxykinase 1	669	0.1	5	0.1	10	7	12	9	14	0.1
Bra009965	Mog1/PsbP/DUF1795-like photosystem II reaction center PsbP family protein	259	2	0.1	2	3	2	3	4	4	4
Bra020681	Ribosomal protein L13 family protein	206	11	10	6	9	6	12	17	11	12
Bra022504	methionine S-methyltransferase	1063	4	6	4	5	10	8	8	10	7
Bra023172	Argonaute family protein	1037	0.1	2	0.1	0.1	2	2	2	5	2
Bra001009	SPFH/Band 7/PHB domain-containing membrane-associated protein family	286	2	0.1	0.1	0.1	0.1	0.1	2	2	0.1
Bra038700	Leucine-rich repeat (LRR) family protein	325	4	5	2	9	10	5	13	4	9
Bra004497	Plastid-lipid associated protein PAP / fibrillin family protein	261	0.1	0.1	0.1	2	5	0.1	4	0.1	2
Bra035926	GroES-like zinc-binding alcohol dehydrogenase family protein	324	0.1	2	0.1	0.1	0.1	0.1	0.1	2	4
Bra008416	glyceraldehyde-3-phosphate dehydrogenase of plastid 1	415	0.1	0.1	0.1	0.1	3	2	2	3	0.1
Bra033286	pyruvate dehydrogenase E1 alpha	426	4	12	3	10	0.1	7	0.1	4	0.1
Bra019430	cyclophilin71	622	2	2	2	0.1	0.1	2	0.1	2	3
Bra008235	Thioredoxin superfamily protein	227	0.1	0.1	0.1	2	4	0.1	2	0.1	3
Bra013167	cycloartenol synthase 1	767	2	0.1	0.1	2	2	2	0.1	0.1	2
Bra013690	NAD(P)-binding Rossmann-fold superfamily protein	324	2	2	0.1	0.1	0.1	0.1	0.1	3	0.1
Bra012012	Ribosomal protein L1p/L10e family	211	5	0.1	6	0.1	0.1	0.1	0.1	0.1	7
Bra013714	Tyrosine transaminase family protein	425	3	7	4	14	7	8	18	6	8
Bra005867	RP non-ATPase subunit 8A	308	0.1	4	2	5	4	4	0.1	0.1	4
Bra014208	Leucine-rich repeat (LRR) family protein	475	3	3	0.1	7	7	4	7	0.1	0.1
Bra005612	Lactoylglutathione lyase / glyoxalase I family protein	137	0.1	0.1	0.1	0.1	2	2	3	0.1	2
Bra023585	binding partner of acd11 1	253	0.1	3	3	0.1	4	0.1	4	3	4
Bra018622	unknown protein;	138	0.1	0.1	3	2	3	3	3	0.1	0.1
Bra002669	phototropin 2	882	0.1	0.1	0.1	4	7	0.1	0.1	5	8
Bra031598	ascorbate peroxidase 1	253	10	0.1	0.1	16	18	15	16	14	0.1
Bra013774	Chaperone protein htpG family protein	822	41	62	38	65	101	66	76	70	66
Bra011450	P-type ATP-ase 1	940	2	0.1	2	0.1	0.1	0.1	0.1	3	0.1
Bra002216	Aluminium induced protein with YGL and LRDR motifs	236	2	0.1	2	0.1	0.1	0.1	0.1	3	0.1
Bra016624	RAB GTPase homolog A1B	216	4	0.1	3	0.1	5	0.1	0.1	0.1	0.1
Bra036724	Pyridoxal-5'-phosphate-dependent enzyme family protein	524	0.1	0.1	6	11	7	0.1	0.1	0.1	0.1
Bra040815	Argonaute family protein	1009	0.1	0.1	0.1	0.1	2	3	4	0.1	2
Bra006315	reversibly glycosylated polypeptide 2	363	10	9	0.1	17	23	12	22	17	20
Bra010965	TCP-1/cpn60 chaperonin family protein	535	0.1	0.1	0.1	3	0.1	3	2	3	0.1
Bra005922	Eukaryotic aspartyl protease family protein	439	0.1	0.1	0.1	0.1	3	2	2	0.1	2
Bra003276	autoinhibited Ca2+-ATPase 11	1025	0.1	3	0.1	0.1	0.1	0.1	2	4	0.1
Bra007864	expansin A1	249	2	0.1	0.1	0.1	0.1	0.1	2	0.1	2
Bra033269	Tetratricopeptide repeat (TPR)-like superfamily protein	1773	6	12	5	5	0.1	12	0.1	7	0.1
Bra015719	O-methyltransferase family protein	370	3	3	2	3	2	3	0.1	2	2
Bra008735	pyrroline-5- carboxylate (P5C) reductase	276	0.1	2	0.1	0.1	0.1	0.1	0.1	2	3
Bra011538	cyclase associated protein 1	477	7	6	5	5	3	7	0.1	5	3
Bra034087	adenosine kinase 1	344	22	31	24	36	35	26	36	35	42
Bra027661	ATP citrate lyase (ACL) family protein	421	0.1	0.1	15	21	28	27	29	0.1	23
Bra007218	biotin/lipoyl attachment domain-containing protein	270	2	2	0.1	3	0.1	0.1	0.1	0.1	0.1
Bra003134	Ribosomal protein L11 family protein	166	16	20	0.1	0.1	26	0.1	0.1	0.1	0.1
Bra028339	Stress responsive alpha-beta barrel domain protein	271	5	3	5	10	8	6	12	5	8
Bra012422	glutathione S-transferase tau 13	198	3	2	0.1	5	6	4	6	4	2
Bra032319	S-adenosyl-L-methionine-dependent methyltransferases superfamily protein	753	5	4	0.1	0.1	0.1	6	0.1	0.1	0.1
Bra000321	Plant stearoyl-acyl-carrier-protein desaturase family protein	398	8	0.1	8	0.1	12	0.1	0.1	0.1	0.1
Bra023503	voltage dependent anion channel 3	597	11	14	6	16	13	12	18	18	16
Bra024238	beta-galactosidase 10	741	3	3	0.1	0.1	0.1	2	2	2	3
Bra022936	Caleosin-related family protein	239	0.1	0.1	0.1	2	0.1	3	5	0.1	2
Bra018549	DNA mismatch repair protein, putative	1123	0.1	0.1	0.1	0.1	8	5	3	0.1	0.1
Bra025263	prohibitin 4	278	0.1	0.1	6	0.1	0.1	0.1	0.1	7	8
Bra013215	ribosomal protein L5	332	22	25	16	23	18	25	22	18	19
Bra025819	Dehydrin family protein	271	0.1	0.1	0.1	5	0.1	6	0.1	2	0.1
Bra005269	starch branching enzyme 2.1	845	0.1	0.1	0.1	0.1	4	7	0.1	6	4
Bra005086	P-loop containing nucleoside triphosphate hydrolases superfamily protein	1501	5	4	3	4	0.1	3	3	7	6
Bra006777	oxidoreductases, acting on NADH or NADPH, quinone or similar compound as acceptor	208	0.1	0.1	2	3	4	2	2	0.1	3
Bra030652	FTSH protease 8	695	0.1	35	0.1	0.1	0.1	0.1	0.1	45	45
Bra028952	heat shock protein 81-3	699	75	0.1	55	0.1	0.1	0.1	0.1	92	0.1
Bra017960	unknown protein;	291	2	4	2	2	0.1	4	3	0.1	0.1
Bra025972	developmentally regulated G-protein 1	392	0.1	0.1	0.1	2	0.1	2	2	0.1	3
Bra002804	profilin 3	131	4	4	3	5	5	3	5	5	8
Bra009454	binding to TOMV RNA 1L (long form)	334	0.1	10	8	10	12	8	10	0.1	0.1
Bra016226	Leucine-rich repeat transmembrane protein kinase	552	0.1	0.1	0.1	4	5	0.1	0.1	2	0.1
Bra007159	methionyl-tRNA synthetase / methionine--tRNA ligase / MetRS (cpMetRS)	610	2	0.1	0.1	0.1	2	5	0.1	0.1	0.1
Bra010820	GDSL-like Lipase/Acylhydrolase superfamily protein	361	40	43	35	49	32	36	53	32	44
Bra036470	ATP citrate lyase (ACL) family protein	421	13	17	0.1	0.1	0.1	0.1	0.1	24	0.1
Bra010643	Haloacid dehalogenase-like hydrolase (HAD) superfamily protein	307	3	3	5	3	2	4	5	2	2
Bra005501	Caleosin-related family protein	239	0.1	0.1	0.1	4	0.1	0.1	7	7	0.1
Bra001857	Ribosomal L27e protein family	135	12	7	5	7	10	0.1	17	17	9
Bra040341	isopropyl malate isomerase large subunit 1	504	13	15	5	13	12	15	10	7	7
Bra039237	Cytosol aminopeptidase family protein	510	0.1	23	0.1	0.1	45	43	41	33	38
Bra018764	nucleolin like 1	500	0.1	2	0.1	0.1	0.1	0.1	0.1	0.1	0.1
Bra022755	ubiquitin-conjugating enzyme 27	192	0.1	2	0.1	0.1	0.1	0.1	0.1	0.1	0.1
Bra031786	Seryl-tRNA synthetase	517	0.1	2	0.1	0.1	0.1	0.1	0.1	0.1	0.1
Bra038636	nuclear factor Y, subunit C4	272	0.1	2	0.1	0.1	0.1	0.1	0.1	0.1	0.1
Bra011307	LOCATED IN: cytosol, chloroplast; EXPRESSED IN: 24 plant structures; EXPRESSED DURING: 14 growth stages; BEST Arabidopsis thaliana protein match is: Tudor/PWWP/MBT superfamily protein (TAIR:AT1G15940.1); Has 137162 Blast hits to 70781 proteins in 2973 species: Archae - 289; Bacteria - 24182; Metazoa - 56725; Fungi - 20130; Plants - 6559; Viruses - 758; Other Eukaryotes - 28519 (source: NCBI BLink…	910	0.1	2	0.1	0.1	0.1	0.1	0.1	0.1	0.1
Bra018988	Protein of unknown function (DUF2921)	1055	0.1	2	0.1	0.1	0.1	0.1	0.1	0.1	0.1
Bra037522	NADH-ubiquinone oxidoreductase B8 subunit, putative	98	0.1	2	0.1	0.1	0.1	0.1	0.1	0.1	0.1
Bra002254	Leucine-rich repeat (LRR) family protein	328	0.1	2	0.1	0.1	0.1	0.1	0.1	0.1	0.1
Bra005709	one helix protein	111	0.1	2	0.1	0.1	0.1	0.1	0.1	0.1	0.1
Bra011754	maternal effect embryo arrest 59	172	0.1	2	0.1	0.1	0.1	0.1	0.1	0.1	0.1
Bra022357	FUNCTIONS IN: molecular_function unknown; INVOLVED IN: biological_process unknown; LOCATED IN: chloroplast; EXPRESSED IN: 22 plant structures; EXPRESSED DURING: 13 growth stages; CONTAINS InterPro DOMAIN/s: Isy1-like splicing (InterPro:IPR009360); Has 1147 Blast hits to 965 proteins in 236 species: Archae - 12; Bacteria - 13; Metazoa - 351; Fungi - 230; Plants - 49; Viruses - 9; Other Eukaryotes …	297	0.1	2	0.1	0.1	0.1	0.1	0.1	0.1	0.1
Bra028338	Tic22-like family protein	307	0.1	2	0.1	0.1	0.1	0.1	0.1	0.1	0.1
Bra029689	rhomboid protein-related	304	0.1	2	0.1	0.1	0.1	0.1	0.1	0.1	0.1
Bra022593	Bacterial sec-independent translocation protein mttA/Hcf106	243	0.1	2	0.1	0.1	0.1	0.1	0.1	0.1	0.1
Bra032286	related to vernalization1 1	220	0.1	2	0.1	0.1	0.1	0.1	0.1	0.1	0.1
Bra026798	nucleoporin 155	1450	0.1	2	0.1	0.1	0.1	0.1	0.1	0.1	0.1
Bra034298	3-ketoacyl-CoA synthase 10	525	0.1	2	0.1	0.1	0.1	0.1	0.1	0.1	0.1
Bra001534	Small nuclear ribonucleoprotein family protein	128	0.1	2	0.1	0.1	0.1	0.1	0.1	0.1	0.1
Bra002519	RNA-binding (RRM/RBD/RNP motifs) family protein	238	0.1	2	0.1	0.1	0.1	0.1	0.1	0.1	0.1
Bra003045	NAD(P)-linked oxidoreductase superfamily protein	361	0.1	2	0.1	0.1	0.1	0.1	0.1	0.1	0.1
Bra011060	GDSL-like Lipase/Acylhydrolase superfamily protein	361	0.1	2	0.1	0.1	0.1	0.1	0.1	0.1	0.1
Bra011546	small subunit ribosomal protein 16	113	0.1	2	0.1	0.1	0.1	0.1	0.1	0.1	0.1
Bra016549	Haloacid dehalogenase-like hydrolase (HAD) superfamily protein	819	0.1	2	0.1	0.1	0.1	0.1	0.1	0.1	0.1
Bra024577	Ribosomal protein L18e/L15 superfamily protein	117	0.1	2	0.1	0.1	0.1	0.1	0.1	0.1	0.1
Bra026162	Endosomal targeting BRO1-like domain-containing protein	864	0.1	2	0.1	0.1	0.1	0.1	0.1	0.1	0.1
Bra028506	COP1-interactive protein 1	1594	0.1	2	0.1	0.1	0.1	0.1	0.1	0.1	0.1
Bra028833	unknown protein;	78	0.1	2	0.1	0.1	0.1	0.1	0.1	0.1	0.1
Bra031134	Protein phosphatase 2C family protein	280	0.1	2	0.1	0.1	0.1	0.1	0.1	0.1	0.1
Bra040142	plastid transcriptionally active 3	905	0.1	2	0.1	0.1	0.1	0.1	0.1	0.1	0.1
Bra008608	hydroxyproline-rich glycoprotein family protein	457	0.1	2	0.1	0.1	0.1	0.1	0.1	0.1	0.1
Bra026669	Auxin efflux carrier family protein	797	0.1	2	0.1	0.1	0.1	0.1	0.1	0.1	0.1
Bra028342	Leucine-rich repeat protein kinase family protein	933	0.1	2	0.1	0.1	0.1	0.1	0.1	0.1	0.1
Bra009358	flavonol synthase 1	336	0.1	2	0.1	0.1	0.1	0.1	0.1	0.1	0.1
Bra007446	enzyme binding;tetrapyrrole binding	256	0.1	2	0.1	0.1	0.1	0.1	0.1	0.1	0.1
Bra020850	Protein of unknown function DUF106, transmembrane	246	0.1	2	0.1	0.1	0.1	0.1	0.1	0.1	0.1
Bra022635	FTSH protease 11	773	0.1	2	0.1	0.1	0.1	0.1	0.1	0.1	0.1
Bra035772	Ankyrin repeat family protein	177	0.1	2	0.1	0.1	0.1	0.1	0.1	0.1	0.1
Bra029902	SNF1-related protein kinase regulatory subunit gamma 1	456	0.1	0.1	0.1	2	0.1	5	3	0.1	2
Bra003389	Rhodanese/Cell cycle control phosphatase superfamily protein	688	11	12	19	12	9	17	16	10	10
Bra011930	Histone superfamily protein	149	2	7	4	9	8	4	5	0.1	3
Bra011251	Class II aminoacyl-tRNA and biotin synthetases superfamily protein	549	11	11	5	6	8	11	13	12	12
Bra037351	RNAhelicase-like 8	510	0.1	3	0.1	0.1	0.1	0.1	2	0.1	3
Bra012279	Target of Myb protein 1	479	0.1	0.1	2	0.1	3	2	0.1	0.1	0.1
Bra001773	T-complex protein 1 alpha subunit	546	8	4	0.1	0.1	0.1	0.1	0.1	0.1	9
Bra039151	Insulinase (Peptidase family M16) protein	529	6	0.1	10	13	12	11	28	12	13
Bra001507	TCP-1/cpn60 chaperonin family protein	590	0.1	83	0.1	0.1	108	98	0.1	0.1	0.1
Bra024861	Ribophorin I	462	0.1	2	0.1	0.1	0.1	0.1	0.1	2	2
Bra003487	Class II aaRS and biotin synthetases superfamily protein	500	7	6	0.1	0.1	0.1	0.1	0.1	0.1	11
Bra030069	nuclear transport factor 2B	123	2	4	3	5	0.1	2	6	4	5
Bra039756	glutamine synthase clone F11	356	8	6	10	7	11	8	8	4	8
Bra034968	Protein of unknown function (DUF1350)	369	0.1	0.1	3	0.1	0.1	0.1	2	0.1	3
Bra029614	Pectin lyase-like superfamily protein	405	0.1	0.1	2	0.1	0.1	0.1	0.1	0.1	0.1
Bra002805	O-Glycosyl hydrolases family 17 protein	492	0.1	0.1	2	0.1	0.1	0.1	0.1	0.1	0.1
Bra035239	phosphatase-related	355	0.1	0.1	2	0.1	0.1	0.1	0.1	0.1	0.1
Bra031553	fructose-2,6-bisphosphatase	748	0.1	0.1	2	0.1	0.1	0.1	0.1	0.1	0.1
Bra002770	myristoyl-CoA:protein N-myristoyltransferase	428	0.1	0.1	2	0.1	0.1	0.1	0.1	0.1	0.1
Bra003313	plant VAP homolog 12	223	0.1	0.1	2	0.1	0.1	0.1	0.1	0.1	0.1
Bra011059	Tetraspanin family protein	273	0.1	0.1	2	0.1	0.1	0.1	0.1	0.1	0.1
Bra013104	poly(A) binding protein 2	616	0.1	0.1	2	0.1	0.1	0.1	0.1	0.1	0.1
Bra028113	unknown protein;	308	0.1	0.1	2	0.1	0.1	0.1	0.1	0.1	0.1
Bra037603	Adaptor protein complex AP-2, alpha subunit	1014	0.1	0.1	2	0.1	0.1	0.1	0.1	0.1	0.1
Bra001692	translocon at the outer membrane of chloroplasts 64-III	591	0.1	0.1	2	0.1	0.1	0.1	0.1	0.1	0.1
Bra002276	Plastid-lipid associated protein PAP / fibrillin family protein	225	0.1	0.1	2	0.1	0.1	0.1	0.1	0.1	0.1
Bra004123	Peptidase C12, ubiquitin carboxyl-terminal hydrolase 1	329	0.1	0.1	2	0.1	0.1	0.1	0.1	0.1	0.1
Bra040243	RmlC-like cupins superfamily protein	229	0.1	0.1	2	0.1	0.1	0.1	0.1	0.1	0.1
Bra017043	Microsomal signal peptidase 25 kDa subunit (SPC25)	217	0.1	0.1	2	0.1	0.1	0.1	0.1	0.1	0.1
Bra018311	cinnamate-4-hydroxylase	505	0.1	0.1	2	0.1	0.1	0.1	0.1	0.1	0.1
Bra023330	catalytics	984	0.1	0.1	2	0.1	0.1	0.1	0.1	0.1	0.1
Bra002198	AWPM-19-like family protein	170	0.1	0.1	2	0.1	0.1	0.1	0.1	0.1	0.1
Bra020835	U5 small nuclear ribonucleoprotein helicase, putative	2087	0.1	0.1	2	0.1	0.1	0.1	0.1	0.1	0.1
Bra039311	Remorin family protein	195	0.1	0.1	2	0.1	0.1	0.1	0.1	0.1	0.1
Bra012176	Major facilitator superfamily protein	468	0.1	0.1	2	0.1	0.1	0.1	0.1	0.1	0.1
Bra008726	Phosphoglycerate mutase-like family protein	1581	0.1	0.1	2	0.1	0.1	0.1	0.1	0.1	0.1
Bra004710	phosphoenolpyruvate carboxylase 2	975	62	0.1	55	0.1	102	0.1	0.1	0.1	0.1
Bra014320	RAB GTPase homolog G3D	206	0.1	0.1	0.1	6	0.1	0.1	12	8	0.1
Bra013830	Rhodanese/Cell cycle control phosphatase superfamily protein	292	0.1	0.1	0.1	0.1	3	3	0.1	2	2
Bra026591	Nucleotide-diphospho-sugar transferases superfamily protein	275	4	0.1	0.1	0.1	5	2	4	5	5
Bra040496	glycosyl hydrolase 9A1	621	0.1	0.1	0.1	0.1	4	5	0.1	2	0.1
Bra006038	26S proteasome regulatory subunit, putative (RPN5)	422	3	0.1	4	6	5	7	7	4	8
Bra007569	FASCICLIN-like arabinogalactan-protein 10	423	5	5	0.1	0.1	0.1	8	0.1	0.1	0.1
Bra010953	nuclear transport factor 2A	122	0.1	0.1	0.1	3	0.1	3	0.1	3	4
Bra036155	Pectin lyase-like superfamily protein	418	3	0.1	0.1	0.1	0.1	0.1	3	0.1	2
Bra032216	gamma carbonic anhydrase 2	276	4	4	4	5	3	0.1	5	5	4
Bra024986	ribosomal protein 1	391	11	19	0.1	0.1	0.1	14	16	17	10
Bra028651	Small GTP-binding protein	684	4	0.1	2	0.1	5	0.1	0.1	0.1	0.1
Bra007663	Class II aaRS and biotin synthetases superfamily protein	513	0.1	0.1	7	11	10	8	10	9	0.1
Bra030666	translocon at the inner envelope membrane of chloroplasts 110	1013	27	28	23	28	30	44	26	30	18
Bra010807	chlorophyll A/B-binding protein 2	267	167	167	339	184	108	228	257	213	160
Bra015668	thylakoidal ascorbate peroxidase	440	11	15	19	16	20	15	16	11	15
Bra022366	transducin family protein / WD-40 repeat family protein	760	0.1	0.1	0.1	2	0.1	0.1	3	3	0.1
Bra028460	embryo defective 3012	1927	0.1	0.1	0.1	0.1	2	0.1	0.1	5	3
Bra005933	TUDOR-SN protein 1	991	11	14	5	14	12	14	19	19	15
Bra007230	copper chaperone	106	0.1	0.1	0.1	0.1	3	0.1	3	7	0.1
Bra007604	cysteine synthase C1	368	29	29	23	35	41	34	29	27	32
Bra039661	sodium/calcium exchanger family protein / calcium-binding EF hand family protein	576	0.1	0.1	0.1	7	0.1	0.1	12	9	0.1
Bra033642	NDH-dependent cyclic electron flow 1	352	3	3	4	2	0.1	2	2	0.1	2
Bra021914	urease accessory protein G	235	2	7	3	2	4	2	3	5	5
Bra013282	S-adenosyl-L-methionine-dependent methyltransferases superfamily protein	620	0.1	3	0.1	0.1	0.1	0.1	0.1	0.1	0.1
Bra011457	unknown protein;	95	0.1	3	0.1	0.1	0.1	0.1	0.1	0.1	0.1
Bra018568	Protein of unknown function, DUF538	184	0.1	3	0.1	0.1	0.1	0.1	0.1	0.1	0.1
Bra035582	DEK domain-containing chromatin associated protein	794	0.1	3	0.1	0.1	0.1	0.1	0.1	0.1	0.1
Bra011140	Pyridoxal-5'-phosphate-dependent enzyme family protein	524	3	4	0.1	0.1	0.1	6	0.1	0.1	0.1
Bra037913	light harvesting complex of photosystem II 5	281	113	117	159	158	106	125	167	167	117
Bra036422	TCP-1/cpn60 chaperonin family protein	544	0.1	12	0.1	15	16	14	15	13	0.1
Bra002523	histone H2A 6	148	0.1	0.1	5	0.1	0.1	0.1	4	0.1	3
Bra003198	photosystem I light harvesting complex gene 1	241	31	29	35	56	37	46	58	43	45
Bra035847	adenylate kinase 1	240	13	12	12	15	16	14	15	8	0.1
Bra019214	phosphoglucose isomerase 1	613	13	5	12	15	21	25	25	13	15
Bra037657	Citrate synthase family protein	475	0.1	5	10	0.1	0.1	0.1	20	0.1	0.1
Bra006902	tetratricopeptide repeat (TPR)-containing protein	1425	0.1	4	0.1	0.1	4	4	0.1	0.1	0.1
Bra038835	H(+)-ATPase 1	949	42	49	38	24	0.1	43	47	43	41
Bra010821	GDSL-like Lipase/Acylhydrolase superfamily protein	364	6	0.1	0.1	0.1	0.1	0.1	4	0.1	5
Bra015501	alpha-crystallin domain 32.1	260	4	0.1	3	0.1	0.1	4	3	3	6
Bra040546	unknown protein;	818	5	0.1	4	3	0.1	2	8	7	9
Bra025660	TLD-domain containing nucleolar protein	538	0.1	0.1	0.1	2	0.1	0.1	3	0.1	3
Bra031959	TCP-1/cpn60 chaperonin family protein	544	11	0.1	6	0.1	0.1	0.1	0.1	0.1	16
Bra021701	Pre-mRNA-processing-splicing factor	2338	2	9	0.1	4	2	4	8	18	7
Bra012249	senescence-associated E3 ubiquitin ligase 1	801	0.1	0.1	2	0.1	2	2	0.1	0.1	0.1
Bra032991	Cytochrome C1 family	307	10	8	10	9	8	12	11	14	11
Bra003706	exocyst complex component sec5	1082	2	0.1	0.1	0.1	0.1	0.1	0.1	0.1	0.1
Bra005759	Tetratricopeptide repeat (TPR)-like superfamily protein	313	2	0.1	0.1	0.1	0.1	0.1	0.1	0.1	0.1
Bra019026	thylakoid-associated phosphatase 38	391	2	0.1	0.1	0.1	0.1	0.1	0.1	0.1	0.1
Bra023574	Leucine-rich repeat protein kinase family protein	613	2	0.1	0.1	0.1	0.1	0.1	0.1	0.1	0.1
Bra038448	guanyl-nucleotide exchange factors;GTPase binding;GTP binding	2072	2	0.1	0.1	0.1	0.1	0.1	0.1	0.1	0.1
Bra032616	pyrophosphorylase 1	203	2	0.1	0.1	0.1	0.1	0.1	0.1	0.1	0.1
Bra036596	Threonyl-tRNA synthetase	707	2	0.1	0.1	0.1	0.1	0.1	0.1	0.1	0.1
Bra013462	gamma-soluble NSF attachment protein	291	2	0.1	0.1	0.1	0.1	0.1	0.1	0.1	0.1
Bra028829	exocyst subunit exo70 family protein A1	323	2	0.1	0.1	0.1	0.1	0.1	0.1	0.1	0.1
Bra039494	high chlorophyll fluorescent 109	452	2	0.1	0.1	0.1	0.1	0.1	0.1	0.1	0.1
Bra027217	Single hybrid motif superfamily protein	264	2	0.1	0.1	0.1	0.1	0.1	0.1	0.1	0.1
Bra032943	cofactor assembly of complex C	264	2	0.1	0.1	0.1	0.1	0.1	0.1	0.1	0.1
Bra001374	DNA GYRASE A	896	2	0.1	0.1	0.1	0.1	0.1	0.1	0.1	0.1
Bra016768	copper chaperone for SOD1	316	2	0.1	0.1	0.1	0.1	0.1	0.1	0.1	0.1
Bra034109	FAD-dependent oxidoreductase family protein	630	2	0.1	0.1	0.1	0.1	0.1	0.1	0.1	0.1
Bra001715	Amino acid kinase family protein	334	2	0.1	0.1	0.1	0.1	0.1	0.1	0.1	0.1
Bra029601	Thioredoxin z	142	2	0.1	0.1	0.1	0.1	0.1	0.1	0.1	0.1
Bra019861	Adenine nucleotide alpha hydrolases-like superfamily protein	253	2	0.1	0.1	0.1	0.1	0.1	0.1	0.1	0.1
Bra025272	succinate dehydrogenase 2-2	281	2	0.1	0.1	0.1	0.1	0.1	0.1	0.1	0.1
Bra040323	plant VAP homolog 12	239	2	0.1	0.1	0.1	0.1	0.1	0.1	0.1	0.1
Bra007631	Acid phosphatase/vanadium-dependent haloperoxidase-related protein	265	2	0.1	0.1	0.1	0.1	0.1	0.1	0.1	0.1
Bra010977	S-adenosyl-L-methionine-dependent methyltransferases superfamily protein	238	2	0.1	0.1	0.1	0.1	0.1	0.1	0.1	0.1
Bra025810	sterol methyltransferase 2	356	2	0.1	0.1	0.1	0.1	0.1	0.1	0.1	0.1
Bra035211	glutathione peroxidase 6	171	2	0.1	0.1	0.1	0.1	0.1	0.1	0.1	0.1
Bra014977	Leucine-rich repeat protein kinase family protein	911	2	0.1	0.1	0.1	0.1	0.1	0.1	0.1	0.1
Bra037531	SOUL heme-binding family protein	333	2	0.1	0.1	0.1	0.1	0.1	0.1	0.1	0.1
Bra006908	dual specificity protein phosphatase (DsPTP1) family protein	353	2	0.1	0.1	0.1	0.1	0.1	0.1	0.1	0.1
Bra003930	cobalt ion binding	179	2	0.1	0.1	0.1	0.1	0.1	0.1	0.1	0.1
Bra024715	Tetratricopeptide repeat (TPR)-like superfamily protein	618	2	0.1	0.1	0.1	0.1	0.1	0.1	0.1	0.1
Bra031762	sugar transporter 1	521	2	0.1	0.1	0.1	0.1	0.1	0.1	0.1	0.1
Bra036622	Domain of unknown function (DUF1995)	336	2	0.1	0.1	0.1	0.1	0.1	0.1	0.1	0.1
Bra037210	NAD-dependent malic enzyme 1	618	2	0.1	0.1	0.1	0.1	0.1	0.1	0.1	0.1
Bra014317	photosystem I subunit H2	145	5	0.1	0.1	5	7	4	0.1	0.1	8
Bra018544	Bifunctional inhibitor/lipid-transfer protein/seed storage 2S albumin superfamily protein	123	0.1	0.1	3	0.1	0.1	0.1	0.1	0.1	0.1
Bra014554	citrate synthase 2	470	0.1	0.1	3	0.1	0.1	0.1	0.1	0.1	0.1
Bra037286	transportin 1	895	0.1	0.1	3	0.1	0.1	0.1	0.1	0.1	0.1
Bra008363	SPFH/Band 7/PHB domain-containing membrane-associated protein family	238	0.1	0.1	3	0.1	0.1	0.1	0.1	0.1	0.1
Bra026016	RAB GTPase homolog A1B	216	0.1	0.1	3	0.1	0.1	0.1	0.1	0.1	0.1
Bra026794	PLANT CADMIUM RESISTANCE 2	147	0.1	0.1	3	0.1	0.1	0.1	0.1	0.1	0.1
Bra036837	S-adenosyl-L-methionine-dependent methyltransferases superfamily protein	914	0.1	0.1	3	0.1	0.1	0.1	0.1	0.1	0.1
Bra001418	Ras-related small GTP-binding family protein	206	0.1	5	0.1	8	8	6	9	0.1	9
Bra025037	Glucose-6-phosphate/phosphate translocator-related	407	8	7	9	5	0.1	8	9	7	5
Bra027840	glutathione S-transferase TAU 16	234	2	0.1	2	3	6	3	3	2	3
Bra004077	unknown protein;	227	4	0.1	6	0.1	0.1	9	0.1	0.1	0.1
Bra030675	Pleckstrin homology (PH) domain superfamily protein	224	7	0.1	0.1	6	7	0.1	0.1	0.1	0.1
Bra041106	photosynthetic electron transfer A	320	0.1	3	0.1	0.1	4	5	4	4	4
Bra035332	proteasome alpha subunit F1	271	5	7	5	0.1	9	5	0.1	0.1	7
Bra002970	Histone superfamily protein	130	0.1	4	0.1	0.1	0.1	0.1	0.1	0.1	0.1
Bra016247	serine/threonine protein phosphatase 2A	306	0.1	4	0.1	0.1	0.1	0.1	0.1	0.1	0.1
Bra022456	YGGT family protein	217	0.1	4	0.1	0.1	0.1	0.1	0.1	0.1	0.1
Bra032586	Ribosomal protein L19e family protein	202	0.1	4	0.1	0.1	0.1	0.1	0.1	0.1	0.1
Bra038466	unknown protein;	128	0.1	4	0.1	0.1	0.1	0.1	0.1	0.1	0.1
Bra015337	lipoyltransferase 2	378	2	2	0.1	2	2	3	4	4	3
Bra024702	Eukaryotic translation initiation factor 5A-1 (eIF-5A 1) protein	159	9	0.1	0.1	0.1	0.1	0.1	6	5	0.1
Bra003007	O-methyltransferase 1	364	4	5	3	7	6	9	5	5	7
Bra003781	aldehyde dehydrogenase 10A8	501	3	3	0.1	5	7	6	6	2	5
Bra006878	metallopeptidase M24 family protein	796	9	8	7	7	9	10	8	0.1	6
Bra004450	fumarase 1	468	5	3	5	4	5	6	6	6	10
Bra006197	Aldolase-type TIM barrel family protein	437	0.1	0.1	0.1	0.1	7	0.1	7	0.1	12
Bra017201	RNA-binding (RRM/RBD/RNP motifs) family protein	288	7	4	9	8	0.1	7	0.1	8	0.1
Bra027273	chloroplast 30S ribosomal protein S20, putative	205	0.1	0.1	3	0.1	4	2	0.1	0.1	0.1
Bra031749	Pyruvate phosphate dikinase, PEP/pyruvate binding domain	1362	8	13	9	0.1	11	18	0.1	12	0.1
Bra031034	Ribosomal protein L6 family protein	234	10	13	9	12	0.1	11	20	16	17
Bra019982	xylem bark cysteine peptidase 3	443	0.1	0.1	0.1	0.1	2	0.1	2	0.1	4
Bra039695	Remorin family protein	678	0.1	0.1	0.1	0.1	9	0.1	12	9	0.1
Bra021421	Tyrosyl-tRNA synthetase, class Ib, bacterial/mitochondrial	497	0.1	3	0.1	5	2	6	3	0.1	4
Bra028708	Ribosomal protein S4 (RPS4A) family protein	262	20	0.1	0.1	0.1	16	16	26	18	19
Bra037782	beta-D-xylosidase 4	776	0.1	3	0.1	4	2	3	0.1	0.1	4
Bra005827	NYC1-like	347	0.1	0.1	4	0.1	0.1	0.1	0.1	0.1	0.1
Bra040319	RNA 3'-terminal phosphate cyclase/enolpyruvate transferase, alpha/beta	516	0.1	0.1	4	0.1	0.1	0.1	0.1	0.1	0.1
Bra027138	NAD(P)-linked oxidoreductase superfamily protein	252	0.1	0.1	4	0.1	0.1	0.1	0.1	0.1	0.1
Bra036142	ATP citrate lyase subunit B 2	729	0.1	0.1	0.1	0.1	48	45	37	0.1	0.1
Bra008658	tRNA synthetase beta subunit family protein	592	6	2	2	3	0.1	2	4	3	2
Bra009898	P-loop containing nucleoside triphosphate hydrolases superfamily protein	231	0.1	5	0.1	0.1	0.1	0.1	0.1	0.1	0.1
Bra011596	BR-signaling kinase 1	512	0.1	5	0.1	0.1	0.1	0.1	0.1	0.1	0.1
Bra016665	methyl-CPG-binding domain 10	341	0.1	5	0.1	0.1	0.1	0.1	0.1	0.1	0.1
Bra012091	dolichyl-diphosphooligosaccharide-protein glycosyltransferase 48kDa subunit family protein	437	0.1	5	0.1	0.1	0.1	0.1	0.1	0.1	0.1
Bra015554	Pleckstrin homology (PH) domain superfamily protein	220	0.1	5	0.1	0.1	0.1	0.1	0.1	0.1	0.1
Bra013204	Nucleic acid-binding, OB-fold-like protein	145	4	3	4	4	3	3	0.1	2	4
Bra016047	germin-like protein 1	217	0.1	0.1	0.1	0.1	0.1	7	0.1	13	11
Bra030570	S-adenosyl-L-methionine-dependent methyltransferases superfamily protein	620	3	0.1	0.1	0.1	0.1	0.1	0.1	0.1	0.1
Bra011325	vesicle-associated membrane protein 711	365	3	0.1	0.1	0.1	0.1	0.1	0.1	0.1	0.1
Bra022520	eukaryotic translation initiation factor 3C	865	3	0.1	0.1	0.1	0.1	0.1	0.1	0.1	0.1
Bra027429	Lysyl-tRNA synthetase, class II	604	3	0.1	0.1	0.1	0.1	0.1	0.1	0.1	0.1
Bra034930	plastid movement impaired1	604	3	0.1	0.1	0.1	0.1	0.1	0.1	0.1	0.1
Bra000821	Thioredoxin superfamily protein	180	5	5	9	5	7	6	8	8	6
Bra024245	histidinol dehydrogenase	469	5	5	6	8	7	11	7	4	7
Bra028837	thylakoid lumen 15.0 kDa protein	224	0.1	0.1	4	3	3	0.1	0.1	0.1	0.1
Bra037771	dicarboxylate transport 2.1	563	0.1	4	0.1	4	0.1	3	0.1	0.1	0.1
Bra009081	actin 7	353	0.1	0.1	0.1	75	81	0.1	77	0.1	0.1
Bra021187	translationally controlled tumor protein	168	0.1	6	0.1	0.1	0.1	0.1	0.1	0.1	0.1
Bra001345	lipid transfer protein 6	113	0.1	6	0.1	0.1	0.1	0.1	0.1	0.1	0.1
Bra019148	fibrillarin 2	307	0.1	6	0.1	0.1	0.1	0.1	0.1	0.1	0.1
Bra011719	Thioredoxin superfamily protein	252	2	0.1	0.1	2	0.1	2	0.1	0.1	0.1
Bra001662	Protein kinase superfamily protein	363	0.1	0.1	5	0.1	0.1	0.1	0.1	0.1	0.1
Bra003837	TRAF-like family protein	337	0.1	0.1	0.1	2	0.1	0.1	2	0.1	4
Bra020000	Translation protein SH3-like family protein	164	3	2	2	0.1	0.1	5	4	0.1	0.1
Bra003874	germin-like protein 1	207	8	9	6	9	16	0.1	11	0.1	0.1
Bra014956	cyanase	168	4	3	7	7	10	3	6	3	0.1
Bra016702	ssDNA-binding transcriptional regulator	269	4	4	2	6	6	5	7	5	4
Bra000757	PGR5-like B	320	6	7	5	0.1	4	3	4	0.1	3
Bra015499	FTSH protease 8	692	32	36	40	45	54	56	62	45	46
Bra010272	serine carboxypeptidase-like 29	477	0.1	0.1	0.1	2	0.1	0.1	3	2	0.1
Bra017161	phosphoribosylaminoimidazole carboxylase, putative / AIR carboxylase, putative	691	2	5	0.1	2	2	2	2	0.1	0.1
Bra023160	N-acetylglucosamine-1-phosphate uridylyltransferase 1	476	0.1	0.1	0.1	0.1	0.1	3	4	0.1	4
Bra020966	RNAse l inhibitor protein 2	605	8	7	5	9	0.1	0.1	0.1	8	10
Bra006578	sucrose synthase 1	806	0.1	0.1	6	0.1	0.1	0.1	0.1	0.1	0.1
Bra001174	TCP-1/cpn60 chaperonin family protein	555	5	2	3	2	3	2	2	6	12
Bra014732	delta 1-pyrroline-5-carboxylate synthase 2	719	3	4	0.1	0.1	0.1	8	0.1	0.1	0.1
Bra039086	prohibitin 4	278	4	7	0.1	7	7	6	9	0.1	0.1
Bra025989	Translation initiation factor 2, small GTP-binding protein	1025	0.1	8	0.1	0.1	0.1	0.1	0.1	0.1	0.1
Bra033355	HSP20-like chaperones superfamily protein	230	4	5	4	4	5	3	0.1	3	4
Bra035848	nuclear protein X1	1191	0.1	0.1	0.1	7	0.1	0.1	9	0.1	7
Bra026029	high chlorophyll fluorescence phenotype 173	607	0.1	0.1	4	0.1	3	3	0.1	0.1	0.1
Bra004806	Ribosomal protein L30/L7 family protein	242	0.1	13	0.1	12	13	0.1	15	11	13
Bra000547	translocon at the inner envelope membrane of chloroplasts 55-II	541	5	7	10	5	5	8	5	7	8
Bra021678	unknown protein;	173	4	4	3	3	3	4	3	4	5
Bra001090	methionine synthase 2	789	78	0.1	69	135	176	132	130	118	122
Bra028579	Zincin-like metalloproteases family protein	701	6	8	0.1	11	12	12	0.1	17	0.1
Bra037214	aldehyde dehydrogenase 6B2	527	2	0.1	2	2	4	2	5	2	5
Bra028789	binding to TOMV RNA 1L (long form)	306	9	0.1	0.1	0.1	0.1	0.1	0.1	4	9
Bra018576	secretion-associated RAS 1B	193	0.1	0.1	8	0.1	0.1	0.1	0.1	0.1	0.1
Bra033402	Coproporphyrinogen III oxidase	389	0.1	0.1	8	0.1	0.1	0.1	0.1	0.1	0.1
Bra000837	photosynthetic electron transfer C	231	24	29	33	28	37	32	32	28	31
Bra032749	serine hydroxymethyltransferase 4	471	17	18	0.1	36	28	31	32	22	28
Bra000474	glutathione S-transferase tau 5	224	12	8	9	18	26	12	21	12	11
Bra037920	Nascent polypeptide-associated complex (NAC), alpha subunit family protein	212	5	0.1	0.1	0.1	0.1	0.1	0.1	0.1	0.1
Bra032651	K+ efflux antiporter 1	1157	0.1	11	0.1	0.1	0.1	0.1	0.1	0.1	0.1
Bra010849	non-ATPase subunit 9	419	3	0.1	0.1	6	3	4	8	4	0.1
Bra006157	exocyst complex component sec10	826	0.1	2	0.1	3	2	3	0.1	2	3
Bra018958	PDI-like 1-5	529	0.1	0.1	0.1	2	0.1	0.1	2	0.1	3
Bra000915	Albino or Glassy Yellow 1	982	15	12	10	8	11	14	10	16	10
Bra025492	RNA binding Plectin/S10 domain-containing protein	179	2	0.1	0.1	3	0.1	3	3	2	3
Bra012676	chloroplast beta-amylase	548	2	3	0.1	0.1	0.1	6	0.1	0.1	0.1
Bra037933	quinolinate synthase	734	0.1	0.1	0.1	0.1	0.1	2	2	3	0.1
Bra021288	winged-helix DNA-binding transcription factor family protein	455	0.1	5	2	0.1	0.1	8	0.1	0.1	0.1
Bra012293	PDI-like 1-1	496	0.1	0.1	0.1	0.1	8	0.1	10	0.1	6
Bra007192	sedoheptulose-bisphosphatase	393	46	43	53	49	59	58	44	41	0.1
Bra020540	TRAF-like family protein	299	6	0.1	0.1	0.1	0.1	0.1	0.1	0.1	0.1
Bra005496	RNA-binding (RRM/RBD/RNP motifs) family protein	376	0.1	0.1	0.1	0.1	3	3	0.1	2	0.1
Bra025844	FKBP-like peptidyl-prolyl cis-trans isomerase family protein	230	0.1	0.1	0.1	0.1	3	0.1	3	3	0.1
Bra035787	TRAF-like family protein	404	6	5	9	9	6	8	12	8	10
Bra005337	Plastid-lipid associated protein PAP / fibrillin family protein	360	6	9	8	7	7	9	11	7	6
Bra008024	Kunitz family trypsin and protease inhibitor protein	226	0.1	0.1	0.1	15	0.1	0.1	21	9	0.1
Bra035248	vacuolar ATP synthase subunit E1	217	0.1	0.1	11	0.1	0.1	0.1	0.1	0.1	0.1
Bra004059	lipoxygenase 2	866	0.1	14	0.1	0.1	0.1	0.1	0.1	0.1	0.1
Bra021930	FAD-binding Berberine family protein	502	0.1	0.1	0.1	0.1	0.1	2	3	0.1	2
Bra021658	FUNCTIONS IN: molecular_function unknown; INVOLVED IN: protein folding, protein transport; LOCATED IN: chloroplast; EXPRESSED IN: 23 plant structures; EXPRESSED DURING: 13 growth stages; CONTAINS InterPro DOMAIN/s: Trigger factor, ribosome-binding, bacterial (InterPro:IPR008881); Has 35333 Blast hits to 34131 proteins in 2444 species: Archae - 798; Bacteria - 22429; Metazoa - 974; Fungi - 991; Pl…	160	0.1	0.1	0.1	0.1	3	2	2	0.1	0.1
Bra013838	26S proteasome, regulatory subunit Rpn7;Proteasome component (PCI) domain	387	6	5	6	6	8	0.1	11	7	9
Bra006227	Glycosyl hydrolase family 38 protein	1020	3	3	5	5	10	6	9	6	4
Bra020639	ATP citrate lyase subunit B 2	608	26	25	22	45	0.1	0.1	0.1	25	29
Bra031097	profilin 1	131	0.1	0.1	14	12	13	0.1	13	14	12
Bra005215	plasma membrane intrinsic protein 2	238	7	0.1	0.1	0.1	0.1	0.1	0.1	0.1	0.1
Bra037461	cytochrome B5 isoform D	138	3	3	3	2	3	5	5	4	4
Bra023969	aspartate aminotransferase 5	453	0.1	16	0.1	0.1	0.1	0.1	0.1	0.1	0.1
Bra002652	HEAT/U-box domain-containing protein	2113	0.1	0.1	13	0.1	0.1	0.1	0.1	0.1	0.1
Bra017321	RNA-binding (RRM/RBD/RNP motifs) family protein	304	4	2	0.1	2	2	2	0.1	2	0.1
Bra032150	TRAF-like family protein	357	12	13	12	18	19	21	24	13	21
Bra008476	P-loop containing nucleoside triphosphate hydrolases superfamily protein	457	16	15	14	18	19	21	22	11	14
Bra012553	RNAse l inhibitor protein 2	605	0.1	0.1	0.1	0.1	10	8	9	0.1	0.1
Bra016866	phosphoenolpyruvate carboxylase 2	964	0.1	50	57	88	106	96	89	80	76
Bra016612	Translation initiation factor 2, small GTP-binding protein	1021	3	0.1	3	0.1	0.1	8	0.1	0.1	0.1
Bra035439	Ribosomal protein S5 family protein	280	0.1	17	0.1	0.1	0.1	0.1	0.1	0.1	0.1
Bra000472	pleckstrin homologue 1	145	3	2	3	0.1	3	2	2	2	3
Bra035219	eukaryotic translation initiation factor 3A	968	8	0.1	0.1	0.1	0.1	0.1	0.1	0.1	0.1
Bra037665	Ribosomal protein L30/L7 family protein	242	8	0.1	0.1	0.1	0.1	0.1	0.1	0.1	0.1
Bra025025	3-ketoacyl-acyl carrier protein synthase I	470	8	0.1	0.1	0.1	0.1	0.1	0.1	0.1	0.1
Bra040927	outer plastid envelope protein 16-1	148	14	11	12	13	11	16	12	11	0.1
Bra030799	Phosphoglycerate mutase, 2,3-bisphosphoglycerate-independent	557	9	0.1	5	10	15	14	16	9	5
Bra013239	Ribosomal protein L13 family protein	206	9	0.1	0.1	0.1	0.1	0.1	0.1	0.1	0.1
Bra023780	Pyruvate kinase family protein	577	9	0.1	0.1	0.1	0.1	0.1	0.1	0.1	0.1
Bra003882	40s ribosomal protein SA	288	0.1	0.1	16	0.1	0.1	0.1	0.1	0.1	0.1
Bra014001	serine hydroxymethyltransferase 4	434	0.1	0.1	16	0.1	0.1	0.1	0.1	0.1	0.1
Bra030182	chlorophyll A/B binding protein 1	267	148	150	316	170	98	210	238	198	142
Bra001368	sulfite reductase	643	0.1	0.1	17	0.1	0.1	0.1	0.1	0.1	0.1
Bra034356	alpha/beta-Hydrolases superfamily protein	641	0.1	10	0.1	10	8	9	11	5	0.1
Bra000157	eukaryotic translation initiation factor 2	293	3	3	2	0.1	5	0.1	4	0.1	2
Bra030546	prohibitin 2	288	6	7	5	10	10	11	7	11	13
Bra002957	thiazole biosynthetic enzyme, chloroplast (ARA6) (THI1) (THI4)	352	0.1	23	0.1	0.1	0.1	0.1	0.1	0.1	0.1
Bra036699	hexokinase 1	499	0.1	4	3	0.1	0.1	11	0.1	0.1	0.1
Bra012474	ARM repeat superfamily protein	586	5	5	3	7	8	7	6	8	5
Bra013148	alanine:glyoxylate aminotransferase	401	0.1	48	55	100	106	92	91	58	58
Bra006340	Ribosomal protein S7e family protein	190	12	0.1	0.1	0.1	0.1	0.1	0.1	0.1	0.1
Bra040435	Chalcone-flavanone isomerase family protein	287	3	2	2	4	4	4	3	3	0.1
Bra024659	glutathione S-transferase tau 13	227	2	0.1	2	5	7	0.1	8	8	6
Bra033415	protochlorophyllide oxidoreductase C	400	0.1	31	0.1	0.1	0.1	0.1	0.1	0.1	0.1
Bra036311	S-adenosylmethionine synthetase 2	365	0.1	0.1	0.1	16	0.1	29	0.1	0.1	19
Bra035347	beta glucosidase 42	490	0.1	0.1	0.1	3	0.1	3	0.1	0.1	2
Bra005601	alpha/beta-Hydrolases superfamily protein	279	3	3	6	5	7	5	10	6	5
Bra028727	ubiquitin-specific protease 12	1138	0.1	6	0.1	6	8	6	7	0.1	9
Bra034277	Nucleotidylyl transferase superfamily protein	395	0.1	0.1	0.1	2	0.1	0.1	2	2	0.1
Bra017976	Mitochondrial import inner membrane translocase subunit Tim17/Tim22/Tim23 family protein	237	0.1	0.1	0.1	0.1	2	4	0.1	2	0.1
Bra019830	arogenate dehydratase 1	1130	0.1	0.1	26	0.1	0.1	0.1	0.1	0.1	0.1
Bra024262	glutamate tRNA synthetase	584	0.1	4	0.1	2	0.1	3	0.1	0.1	0.1
Bra018836	Alanyl-tRNA synthetase	956	7	16	9	9	12	11	15	19	11
Bra030522	FZO-like	909	2	4	2	0.1	0.1	4	5	3	0.1
Bra024922	binding	1625	2	2	0.1	2	2	2	5	4	2
Bra016948	glutamate synthase 2	1626	18	0.1	0.1	0.1	0.1	0.1	0.1	0.1	0.1
Bra005736	isocitrate dehydrogenase V	370	4	3	6	0.1	0.1	8	0.1	11	0.1
Bra017452	ribosomal protein S17	96	7	9	6	5	4	3	0.1	6	5
Bra010126	Phosphoglycerate mutase family protein	292	0.1	0.1	0.1	2	2	0.1	2	0.1	0.1
Bra008924	Putative lysine decarboxylase family protein	216	0.1	0.1	0.1	2	2	0.1	2	0.1	0.1
Bra027566	SNARE-like superfamily protein	148	0.1	0.1	0.1	2	2	0.1	2	0.1	0.1
Bra010717	fructose-bisphosphate aldolase 2	393	133	151	141	147	173	169	126	0.1	127
Bra031383	general regulatory factor 10	253	23	32	20	36	45	35	37	28	33
Bra029854	homolog of anti-oxidant 1	76	6	6	3	4	3	4	3	3	7
Bra015883	ADP-glucose pyrophosphorylase family protein	413	8	2	5	0.1	5	3	5	3	4
Bra014493	FKBP-like peptidyl-prolyl cis-trans isomerase family protein	233	0.1	0.1	0.1	2	0.1	0.1	0.1	3	2
Bra027833	protein phosphatase 2A-2	306	5	0.1	0.1	3	0.1	3	0.1	0.1	0.1
Bra007130	glutathione transferase lambda 2	296	3	4	3	4	6	4	4	2	4
Bra011314	aspartate aminotransferase 5	815	18	0.1	17	27	38	30	22	24	24
Bra035201	Molecular chaperone Hsp40/DnaJ family protein	501	0.1	0.1	0.1	2	0.1	0.1	2	0.1	2
Bra033687	ureidoglycolate amidohydrolase	483	0.1	0.1	0.1	2	0.1	0.1	2	0.1	2
Bra023108	RNA-binding (RRM/RBD/RNP motifs) family protein	291	0.1	0.1	0.1	0.1	7	0.1	5	0.1	6
Bra039496	ARM repeat superfamily protein	411	0.1	0.1	0.1	2	0.1	4	0.1	2	0.1
Bra039823	thioglucoside glucohydrolase 1	552	0.1	9	0.1	13	13	6	17	0.1	13
Bra007180	Translation initiation factor IF6	245	2	0.1	0.1	4	4	0.1	4	2	2
Bra021275	pyrimidine 1	424	2	0.1	2	3	3	0.1	8	3	5
Bra006314	Mitochondrial substrate carrier family protein	323	0.1	0.1	0.1	0.1	0.1	2	2	2	0.1
Bra034055	Ribosomal protein L10 family protein	323	29	0.1	0.1	0.1	0.1	0.1	0.1	0.1	0.1
Bra013121	vaculolar sorting receptor 3	631	0.1	0.1	0.1	4	3	0.1	4	0.1	0.1
Bra024005	Coatomer, beta subunit	948	11	14	6	8	17	14	17	25	14
Bra018030	Clp ATPase	888	0.1	0.1	65	0.1	0.1	0.1	0.1	0.1	0.1
Bra030380	alpha/beta-Hydrolases superfamily protein	376	6	8	6	9	7	8	4	7	7
Bra021844	MOS4-associated complex 3B	442	0.1	0.1	0.1	0.1	3	2	0.1	2	0.1
Bra026055	mercaptopyruvate sulfurtransferase 1	380	3	2	2	3	0.1	3	4	0.1	0.1
Bra026009	rhamnose biosynthesis 1	672	12	17	11	15	11	13	13	23	16
Bra012916	Translation protein SH3-like family protein	146	9	8	3	9	13	9	10	16	12
Bra040119	Ribosomal protein S3Ae	261	24	27	13	20	20	19	24	22	26
Bra022360	RAB GTPase homolog G3F	206	6	5	7	9	9	0.1	15	12	9
Bra028321	alpha/beta-Hydrolases superfamily protein	239	0.1	3	4	5	7	4	6	3	6
Bra002728	Haloacid dehalogenase-like hydrolase (HAD) superfamily protein	238	2	3	2	2	3	3	3	2	0.1
Bra019344	pyrimidin 4	346	0.1	0.1	0.1	0.1	4	2	3	0.1	0.1
Bra014024	Chlorophyll A-B binding family protein	265	42	30	65	77	90	73	88	60	41
Bra024620	spermidine synthase 1	344	11	7	7	14	13	13	15	10	10
Bra017751	Serine carboxypeptidase S28 family protein	505	4	0.1	3	5	5	4	5	6	5
Bra003645	glutathione S-transferase TAU 20	204	6	6	3	8	6	9	10	12	6
Bra007342	adenylosuccinate synthase	490	7	9	3	9	16	11	8	8	8
Bra020005	Translation elongation factor EF1B, gamma chain	413	31	32	24	39	53	42	43	35	44
Bra003397	methylenetetrahydrofolate reductase 1	592	27	26	19	46	34	36	40	32	24
Bra039987	tubulin beta-7 chain	449	76	0.1	0.1	0.1	0.1	0.1	0.1	0.1	0.1
Bra003845	sucrose synthase 6	940	0.1	0.1	4	2	0.1	2	0.1	0.1	0.1
Bra004293	Thioesterase superfamily protein	200	3	2	3	3	3	2	3	3	2
Bra034814	Dihydroneopterin aldolase	149	0.1	0.1	2	4	2	2	4	0.1	4
Bra005425	light-harvesting chlorophyll-protein complex II subunit B1	266	163	163	334	194	111	233	259	228	168
Bra032619	pyruvate dehydrogenase E1 alpha	425	0.1	0.1	0.1	0.1	9	0.1	9	0.1	4
Bra000377	Bifunctional inhibitor/lipid-transfer protein/seed storage 2S albumin superfamily protein	131	11	14	15	20	10	7	12	16	14
Bra012788	hydroperoxide lyase 1	489	18	20	21	30	26	22	39	23	25
Bra011609	Uncharacterised conserved protein (UCP030210)	367	0.1	3	0.1	4	2	3	4	2	0.1
Bra000785	fibrillin	327	12	5	19	27	25	16	25	15	24
Bra013847	thylakoid lumenal 17.9 kDa protein, chloroplast	243	2	3	2	2	3	2	3	2	3
Bra032172	poly(A) binding protein 4	644	3	4	2	2	0.1	4	3	2	4
Bra025164	terpene synthase-like sequence-1,8-cineole	1062	5	0.1	0.1	2	0.1	3	0.1	0.1	0.1
Bra009943	Ribosomal L22e protein family	122	11	0.1	0.1	5	0.1	4	0.1	0.1	0.1
Bra037480	receptor-like protein kinase-related family protein	261	2	3	7	7	13	6	9	2	4
Bra003047	YELLOW STRIPE like 3	805	5	7	3	8	13	5	9	10	8
Bra024139	atypical CYS HIS rich thioredoxin 2	240	4	3	4	3	2	3	4	3	0.1
Bra021548	pectin methylesterase 3	592	0.1	0.1	0.1	19	0.1	20	0.1	0.1	28
Bra013507	ribophorin II (RPN2) family protein	696	5	6	0.1	6	8	5	11	9	7
Bra004504	photosystem I P subunit	183	5	3	0.1	8	6	4	4	7	6
Bra025366	AIG2-like (avirulence induced gene) family protein	168	0.1	0.1	0.1	0.1	0.1	3	0.1	3	3
Bra008953	catalytics	1546	5	5	0.1	7	7	6	8	8	6
Bra029106	NADH-ubiquinone oxidoreductase-related	170	5	4	3	3	0.1	4	0.1	2	2
Bra018425	ATP-citrate lyase A-1	423	5	4	0.1	8	5	5	7	6	7
Bra016976	Protein kinase family protein with ARM repeat domain	796	0.1	0.1	0.1	2	0.1	0.1	0.1	2	2
Bra038725	cystatin B	205	0.1	0.1	0.1	4	0.1	0.1	0.1	3	4
Bra016548	3-phosphoserine phosphatase	370	2	2	3	3	3	2	2	0.1	3
Bra025305	ribosomal protein L12-A	189	7	12	10	10	11	10	12	0.1	8
Bra017914	Phosphoenolpyruvate carboxylase family protein	317	0.1	0.1	0.1	0.1	0.1	3	3	0.1	2
Bra032124	Translation initiation factor 3 protein	295	5	4	2	2	3	4	3	3	3
Bra012397	MLP-like protein 423	114	12	8	5	7	10	9	12	12	11
Bra008581	Zinc-binding dehydrogenase family protein	344	4	0.1	2	5	2	5	6	4	4
Bra031785	Glycine cleavage T-protein family	408	0.1	44	45	69	64	62	75	52	58
Bra005546	PDI-like 2-3	443	0.1	0.1	0.1	2	2	0.1	0.1	0.1	2
Bra015636	Glycosyl hydrolase family protein	769	5	0.1	0.1	0.1	5	6	4	6	4
Bra027936	calreticulin 1a	423	6	7	0.1	11	13	11	5	0.1	4
Bra006272	Heavy metal transport/detoxification superfamily protein	182	6	7	5	5	5	8	6	9	8
Bra035407	alpha-xylosidase 1	927	0.1	0.1	0.1	0.1	7	7	13	0.1	0.1
Bra035299	Pectin lyase-like superfamily protein	478	0.1	0.1	0.1	0.1	3	0.1	2	2	0.1
Bra037229	pyrophosphorylase 2	219	0.1	0.1	0.1	0.1	0.1	2	0.1	2	2
Bra014340	Aldolase superfamily protein	389	11	9	0.1	9	18	16	10	20	16
Bra039167	auxin transport protein (BIG)	4810	2	0.1	2	2	2	4	3	3	3
Bra001152	regulatory particle triple-A ATPase 5A	424	8	5	7	9	10	9	9	7	6
Bra034824	Thioredoxin superfamily protein	261	41	0.1	48	64	82	54	68	65	52
Bra040520	carbonic anhydrase 1	333	131	128	135	162	204	139	176	138	125
Bra005673	Tautomerase/MIF superfamily protein	114	7	10	9	8	5	6	0.1	9	6
Bra030661	NAD(P)-linked oxidoreductase superfamily protein	377	4	3	6	4	2	4	4	4	0.1
Bra031197	SMAD/FHA domain-containing protein	213	4	4	0.1	6	3	5	8	6	5
Bra004950	plasma membrane intrinsic protein 1B	286	0.1	0.1	33	27	18	24	34	25	0.1
Bra028187	general regulatory factor 3	257	39	45	44	41	61	51	56	54	58
Bra009536	adenosine kinase 2	344	30	32	26	41	32	33	37	39	47
Bra005687	Aldolase-type TIM barrel family protein	309	16	0.1	0.1	0.1	18	0.1	6	10	7
Bra003565	tetratricopeptide repeat (TPR)-containing protein	1618	5	8	3	4	5	7	5	12	11
Bra034172	Cleavage and polyadenylation specificity factor (CPSF) A subunit protein	1214	2	6	3	2	5	3	2	5	0.1
Bra018017	breast basic conserved 1	206	13	13	10	14	13	18	0.1	13	12
Bra038675	lysyl-tRNA synthetase 1	618	8	8	5	2	3	5	0.1	8	4
Bra010419	aconitase 2	995	2	0.1	3	0.1	4	0.1	2	2	3
Bra024798	Ribosomal protein S5/Elongation factor G/III/V family protein	984	5	7	2	7	9	8	7	10	7
Bra030155	GDSL-like Lipase/Acylhydrolase superfamily protein	364	8	8	4	5	6	7	8	6	8
Bra007214	rotamase cyclophilin 2	182	3	3	3	3	4	3	3	4	2
Bra022029	3-ketoacyl-acyl carrier protein synthase I	472	0.1	15	10	14	20	16	21	15	13
Bra012809	ATP synthase D chain, mitochondrial	168	3	4	4	0.1	6	3	5	5	3
Bra001547	pectin methylesterase 3	591	10	9	8	10	14	8	13	11	12
Bra027987	GDSL-like Lipase/Acylhydrolase superfamily protein	370	0.1	0.1	0.1	3	2	0.1	4	0.1	0.1
Bra039648	tubulin alpha-2 chain	450	84	97	61	109	125	117	101	78	99
Bra027770	isoprenoid F	233	0.1	0.1	0.1	0.1	5	2	0.1	4	0.1
Bra015815	tubulin beta-1 chain	447	65	69	52	77	93	88	77	58	75
Bra011130	Alkaline-phosphatase-like family protein	449	0.1	0.1	0.1	3	2	0.1	0.1	0.1	3
Bra012861	20S proteasome alpha subunit PAD1	250	9	11	9	13	13	11	14	10	8
Bra006960	Aldolase superfamily protein	378	58	54	44	65	0.1	57	69	57	69
Bra010620	mitochondrial heat shock protein 70-1	676	0.1	0.1	0.1	0.1	13	12	0.1	29	0.1
Bra004901	ribosomal protein S13A	151	14	17	8	11	5	14	14	5	12
Bra000743	eukaryotic translation initiation factor 3A	982	8	12	2	7	0.1	8	9	13	8
Bra020019	NAD(P)-binding Rossmann-fold superfamily protein	326	5	3	0.1	6	4	7	5	4	6
Bra008241	SKU5 similar 5	548	11	9	7	13	23	11	14	11	0.1
Bra010668	SAP domain-containing protein	597	6	5	4	4	2	7	0.1	3	6
Bra035228	Adaptin family protein	899	5	9	4	10	10	10	9	14	7
Bra034166	Clathrin, heavy chain	1448	37	48	26	49	58	52	55	60	51
Bra020523	thioglucoside glucohydrolase 1	306	19	20	0.1	37	20	15	36	19	39
Bra023169	aspartate kinase-homoserine dehydrogenase i	909	8	12	5	6	7	10	9	6	6
Bra025858	Phosphofructokinase family protein	619	0.1	4	0.1	3	5	2	3	0.1	3
Bra032410	Coatomer epsilon subunit	293	0.1	4	3	5	6	3	6	3	5
Bra021431	Ribosomal protein S7e family protein	351	13	9	8	14	12	12	14	16	14
Bra004730	Phosphoribosyltransferase family protein	343	4	0.1	0.1	5	2	2	6	0.1	0.1
Bra036771	acetyl-CoA carboxylase 1	2233	6	7	2	4	8	9	10	12	7
Bra019797	glyceraldehyde 3-phosphate dehydrogenase A subunit 2	399	177	170	174	196	211	194	206	203	0.1
Bra036710	Ribosomal L28e protein family	143	11	18	9	13	15	0.1	13	9	14
Bra021427	Plant stearoyl-acyl-carrier-protein desaturase family protein	395	0.1	0.1	0.1	7	0.1	0.1	0.1	3	5
Bra005211	Thioredoxin superfamily protein	241	2	0.1	0.1	4	0.1	2	2	2	2
Bra027685	6-phosphogluconate dehydrogenase family protein	487	12	13	11	11	0.1	17	13	11	14
Bra024278	Aldolase-type TIM barrel family protein	333	0.1	0.1	0.1	0.1	0.1	0.1	2	0.1	0.1
Bra020950	FKBP-like peptidyl-prolyl cis-trans isomerase family protein	210	0.1	0.1	0.1	0.1	0.1	0.1	2	0.1	0.1
Bra036833	NAD(P)-binding Rossmann-fold superfamily protein	360	0.1	0.1	0.1	0.1	0.1	0.1	2	0.1	0.1
Bra009118	Outer membrane OMP85 family protein	527	0.1	0.1	0.1	0.1	0.1	0.1	2	0.1	0.1
Bra028252	conserved oligomeric Golgi complex component-related / COG complex component-related	789	0.1	0.1	0.1	0.1	0.1	0.1	2	0.1	0.1
Bra000091	annexin 3	319	0.1	0.1	0.1	0.1	0.1	0.1	2	0.1	0.1
Bra001573	Peptide-N4-(N-acetyl-beta-glucosaminyl)asparagine amidase A protein	606	0.1	0.1	0.1	0.1	0.1	0.1	2	0.1	0.1
Bra007671	RNA helicase family protein	718	0.1	0.1	0.1	0.1	0.1	0.1	2	0.1	0.1
Bra009445	3-ketoacyl-CoA synthase 19	463	0.1	0.1	0.1	0.1	0.1	0.1	2	0.1	0.1
Bra013539	BCL-2-associated athanogene 7	455	0.1	0.1	0.1	0.1	0.1	0.1	2	0.1	0.1
Bra016476	RING/FYVE/PHD zinc finger superfamily protein	553	0.1	0.1	0.1	0.1	0.1	0.1	2	0.1	0.1
Bra027302	Leucine-rich repeat transmembrane protein kinase	938	0.1	0.1	0.1	0.1	0.1	0.1	2	0.1	0.1
Bra031539	carotenoid isomerase	589	0.1	0.1	0.1	0.1	0.1	0.1	2	0.1	0.1
Bra031995	NAD(P)-binding Rossmann-fold superfamily protein	328	0.1	0.1	0.1	0.1	0.1	0.1	2	0.1	0.1
Bra039967	NAD(P)-binding Rossmann-fold superfamily protein	262	0.1	0.1	0.1	0.1	0.1	0.1	2	0.1	0.1
Bra004835	beta glucosidase 15	506	0.1	0.1	0.1	0.1	0.1	0.1	2	0.1	0.1
Bra006108	FUNCTIONS IN: molecular_function unknown; INVOLVED IN: biological_process unknown; LOCATED IN: cytosol, plasma membrane; EXPRESSED IN: 26 plant structures; EXPRESSED DURING: 15 growth stages; CONTAINS InterPro DOMAIN/s: WW-domain-binding protein (InterPro:IPR018826); Has 1807 Blast hits to 1807 proteins in 277 species: Archae - 0; Bacteria - 0; Metazoa - 736; Fungi - 347; Plants - 385; Viruses - …	207	0.1	0.1	0.1	0.1	0.1	0.1	2	0.1	0.1
Bra018932	peptidase M20/M25/M40 family protein	442	0.1	0.1	0.1	0.1	0.1	0.1	2	0.1	0.1
Bra024877	Calcium-dependent lipid-binding (CaLB domain) family protein	180	0.1	0.1	0.1	0.1	0.1	0.1	2	0.1	0.1
Bra038753	methionine sulfoxide reductase B 2	207	0.1	0.1	0.1	0.1	0.1	0.1	2	0.1	0.1
Bra014240	sirohydrochlorin ferrochelatase B	228	0.1	0.1	0.1	0.1	0.1	0.1	2	0.1	0.1
Bra016253	glutathione S-transferase TAU 12	228	0.1	0.1	0.1	0.1	0.1	0.1	2	0.1	0.1
Bra016808	Seryl-tRNA synthetase	512	0.1	0.1	0.1	0.1	0.1	0.1	2	0.1	0.1
Bra029622	Sec23/Sec24 protein transport family protein	1009	0.1	0.1	0.1	0.1	0.1	0.1	2	0.1	0.1
Bra002255	staurosporin and temperature sensitive 3-like A	781	0.1	0.1	0.1	0.1	0.1	0.1	2	0.1	0.1
Bra003627	Alpha-helical ferredoxin	222	0.1	0.1	0.1	0.1	0.1	0.1	2	0.1	0.1
Bra005238	xyloglucan endotransglucosylase/hydrolase 32	299	0.1	0.1	0.1	0.1	0.1	0.1	2	0.1	0.1
Bra021059	Class II aminoacyl-tRNA and biotin synthetases superfamily protein	562	0.1	0.1	0.1	0.1	0.1	0.1	2	0.1	0.1
Bra031666	NAD(P)-binding Rossmann-fold superfamily protein	316	0.1	0.1	0.1	0.1	0.1	0.1	2	0.1	0.1
Bra040046	Protein of unknown function, DUF642	365	0.1	0.1	0.1	0.1	0.1	0.1	2	0.1	0.1
Bra030486	Membrane trafficking VPS53 family protein	824	0.1	0.1	0.1	0.1	0.1	0.1	2	0.1	0.1
Bra004118	LETM1-like protein	749	0.1	0.1	0.1	0.1	0.1	0.1	2	0.1	0.1
Bra016719	Involved in response to salt stress. Knockout mutants are hypersensitive to salt stress.	156	0.1	0.1	0.1	0.1	0.1	0.1	2	0.1	0.1
Bra022692	homogentisate 1,2-dioxygenase	447	0.1	0.1	0.1	0.1	0.1	0.1	2	0.1	0.1
Bra037776	beta-ureidopropionase	408	0.1	0.1	0.1	0.1	0.1	0.1	2	0.1	0.1
Bra004583	Nucleic acid-binding, OB-fold-like protein	382	0.1	0.1	0.1	0.1	0.1	0.1	2	0.1	0.1
Bra012218	expansin 11	252	0.1	0.1	0.1	0.1	0.1	0.1	2	0.1	0.1
Bra026171	serine carboxypeptidase-like 50	452	0.1	0.1	0.1	0.1	0.1	0.1	2	0.1	0.1
Bra027961	NAD(P)-binding Rossmann-fold superfamily protein	303	0.1	0.1	0.1	0.1	0.1	0.1	2	0.1	0.1
Bra038059	Dynein light chain type 1 family protein	124	0.1	0.1	0.1	0.1	0.1	0.1	2	0.1	0.1
Bra002623	rotamase CYP 7	196	0.1	0.1	0.1	0.1	0.1	0.1	2	0.1	0.1
Bra013410	Ras-related small GTP-binding family protein	200	0.1	0.1	0.1	0.1	0.1	0.1	2	0.1	0.1
Bra029523	adenosine/AMP deaminase family protein	355	0.1	0.1	0.1	0.1	0.1	0.1	2	0.1	0.1
Bra034875	calcium-dependent lipid-binding family protein	853	0.1	0.1	0.1	0.1	0.1	0.1	2	0.1	0.1
Bra013426	Glycosyl hydrolase family protein with chitinase insertion domain	269	0.1	0.1	0.1	0.1	0.1	0.1	2	0.1	0.1
Bra029711	ubiquitin-conjugating enzyme 11	310	0.1	0.1	0.1	0.1	0.1	0.1	2	0.1	0.1
Bra037878	Nitrilase/cyanide hydratase and apolipoprotein N-acyltransferase family protein	326	0.1	0.1	0.1	0.1	0.1	0.1	2	0.1	0.1
Bra018395	beta-hydroxyisobutyryl-CoA hydrolase 1	373	0.1	0.1	0.1	0.1	0.1	0.1	2	0.1	0.1
Bra025936	Endosomal targeting BRO1-like domain-containing protein	405	0.1	0.1	0.1	0.1	0.1	0.1	2	0.1	0.1
Bra019518	chloroplastic lipocalin	346	6	5	8	6	7	7	9	7	6
Bra040433	chloroplast stem-loop binding protein of 41 kDa	383	27	27	26	30	35	26	22	34	25
Bra009854	BURP domain-containing protein	387	0.1	0.1	0.1	0.1	0.1	0.1	3	0.1	0.1
Bra027294	unknown protein;	937	0.1	0.1	0.1	0.1	0.1	0.1	3	0.1	0.1
Bra011268	Protein kinase superfamily protein	600	0.1	0.1	0.1	0.1	0.1	0.1	3	0.1	0.1
Bra021882	Nucleic acid-binding, OB-fold-like protein	184	0.1	0.1	0.1	0.1	0.1	0.1	3	0.1	0.1
Bra011395	CONTAINS InterPro DOMAIN/s: Nuclear pore complex protein, Nucleoporin Nup85-like (InterPro:IPR011502); Has 30201 Blast hits to 17322 proteins in 780 species: Archae - 12; Bacteria - 1396; Metazoa - 17338; Fungi - 3422; Plants - 5037; Viruses - 0; Other Eukaryotes - 2996 (source: NCBI BLink).	722	0.1	0.1	0.1	0.1	0.1	0.1	3	0.1	0.1
Bra013127	proline iminopeptidase	328	0.1	0.1	0.1	0.1	0.1	0.1	3	0.1	0.1
Bra019934	protein phosphatase 2A-2	306	0.1	0.1	0.1	0.1	0.1	0.1	3	0.1	0.1
Bra031722	Nucleic acid-binding, OB-fold-like protein	139	0.1	0.1	0.1	0.1	0.1	0.1	3	0.1	0.1
Bra037219	cytochrome P450, family 71, subfamily B, polypeptide 2	502	0.1	0.1	0.1	0.1	0.1	0.1	3	0.1	0.1
Bra018640	AAA-type ATPase family protein	430	0.1	0.1	0.1	0.1	0.1	0.1	3	0.1	0.1
Bra036989	NAD(P)-linked oxidoreductase superfamily protein	323	0.1	0.1	0.1	0.1	0.1	0.1	3	0.1	0.1
Bra038291	isovaleryl-CoA-dehydrogenase	409	0.1	0.1	0.1	0.1	0.1	0.1	3	0.1	0.1
Bra030796	Eukaryotic aspartyl protease family protein	452	0.1	0.1	0.1	0.1	0.1	0.1	3	0.1	0.1
Bra026698	RAB GTPase homolog A1B	216	0.1	0.1	0.1	5	0.1	2	6	0.1	0.1
Bra015850	Ribosomal protein L31	147	5	11	5	10	9	7	5	8	5
Bra019416	xyloglucan endo-transglycosylase-related 8	292	0.1	0.1	0.1	0.1	0.1	0.1	4	0.1	0.1
Bra029831	phenylalanine ammonia-lyase 4	706	0.1	0.1	0.1	0.1	0.1	0.1	4	0.1	0.1
Bra017711	NADPH-dependent thioredoxin reductase B	312	0.1	0.1	0.1	0.1	0.1	0.1	4	0.1	0.1
Bra022105	sulfite oxidase	394	0.1	0.1	0.1	0.1	0.1	0.1	4	0.1	0.1
Bra024498	FUNCTIONS IN: molecular_function unknown; INVOLVED IN: biological_process unknown; CONTAINS InterPro DOMAIN/s: Domain of unknown function DUF1990 (InterPro:IPR018960).	210	0.1	0.1	0.1	0.1	0.1	0.1	4	0.1	0.1
Bra021400	fumarase 1	611	0.1	0.1	0.1	0.1	0.1	0.1	4	0.1	0.1
Bra034693	Transducin/WD40 repeat-like superfamily protein	1153	0.1	0.1	0.1	0.1	0.1	0.1	4	0.1	0.1
Bra025728	Pathogenesis-related thaumatin superfamily protein	246	0.1	0.1	0.1	0.1	0.1	0.1	4	0.1	0.1
Bra025392	Glycosyl transferase, family 35	960	17	24	23	33	20	29	19	23	20
Bra015153	Nucleic acid-binding, OB-fold-like protein	145	0.1	0.1	0.1	0.1	0.1	0.1	5	0.1	0.1
Bra038266	actin depolymerizing factor 2	167	0.1	0.1	0.1	0.1	0.1	0.1	5	0.1	0.1
Bra007508	beta glucosidase 16	514	0.1	0.1	0.1	0.1	0.1	0.1	5	0.1	0.1
Bra014655	Calcium-dependent phosphotriesterase superfamily protein	381	0.1	0.1	0.1	0.1	0.1	0.1	5	0.1	0.1
Bra020006	RAB GTPase 11C	217	0.1	0.1	0.1	0.1	0.1	0.1	5	0.1	0.1
Bra031513	DC1 domain-containing protein	578	0.1	0.1	0.1	3	0.1	0.1	0.1	2	2
Bra008187	NmrA-like negative transcriptional regulator family protein	312	0.1	0.1	0.1	0.1	0.1	0.1	6	0.1	0.1
Bra017671	LYR family of Fe/S cluster biogenesis protein	117	0.1	0.1	0.1	0.1	0.1	0.1	6	0.1	0.1
Bra015345	vesicle-associated membrane protein 721	220	0.1	0.1	0.1	0.1	0.1	0.1	6	0.1	0.1
Bra024087	xyloglucan endotransglucosylase/hydrolase 17	284	0.1	0.1	0.1	0.1	0.1	0.1	7	0.1	0.1
Bra008013	Sec14p-like phosphatidylinositol transfer family protein	496	0.1	0.1	0.1	0.1	0.1	0.1	8	0.1	0.1
Bra001637	translationally controlled tumor protein	168	8	0.1	8	11	14	12	7	8	9
Bra007399	P-loop containing nucleoside triphosphate hydrolases superfamily protein	611	0.1	0.1	0.1	0.1	0.1	0.1	9	0.1	0.1
Bra006687	actin depolymerizing factor 1	153	0.1	0.1	0.1	0.1	0.1	0.1	9	0.1	0.1
Bra022660	cytochrome B5 isoform E	134	0.1	0.1	0.1	0.1	0.1	0.1	9	0.1	0.1
Bra020323	lipid transfer protein 3	111	0.1	0.1	0.1	0.1	0.1	0.1	13	0.1	0.1
Bra035913	calnexin 1	535	0.1	0.1	0.1	0.1	0.1	0.1	14	0.1	0.1
Bra038716	Nascent polypeptide-associated complex (NAC), alpha subunit family protein	133	7	9	5	0.1	9	8	8	9	7
Bra029931	breast basic conserved 1	206	0.1	0.1	0.1	0.1	0.1	0.1	17	0.1	0.1
Bra008683	reversibly glycosylated polypeptide 2	357	0.1	0.1	0.1	0.1	0.1	0.1	20	0.1	0.1
Bra020322	lipid transfer protein 4	112	0.1	0.1	0.1	0.1	0.1	0.1	20	0.1	0.1
Bra020060	Mitochondrial substrate carrier family protein	299	0.1	0.1	0.1	0.1	0.1	0.1	21	0.1	0.1
Bra028521	Heat shock protein 70 (Hsp 70) family protein	665	0.1	0.1	0.1	0.1	0.1	0.1	69	0.1	0.1
Bra003451	photosystem I light harvesting complex gene 2	259	0.1	0.1	0.1	0.1	0.1	0.1	70	0.1	0.1
Bra027866	Disease resistance protein (CC-NBS-LRR class) family	929	3	3	0.1	4	5	4	4	5	2
Bra001550	Aldolase-type TIM barrel family protein	367	0.1	85	80	115	100	109	106	93	84
Bra012346	CYTOCHROME C-1	112	3	2	2	2	2	0.1	2	2	0.1
Bra032808	NAD(P)-binding Rossmann-fold superfamily protein	320	16	18	10	20	20	21	16	13	17
Bra004989	light harvesting complex photosystem II	276	39	36	58	80	59	72	78	57	51
Bra036257	cullin 1	986	3	4	2	0.1	4	4	6	3	4
Bra021549	pectin methylesterase 3	592	15	20	21	0.1	29	18	21	15	28
Bra008961	Mog1/PsbP/DUF1795-like photosystem II reaction center PsbP family protein	297	5	4	2	2	2	4	3	4	0.1
Bra009895	TRAF-like family protein	350	9	13	0.1	14	12	9	18	12	16
Bra001063	isopentenyl pyrophosphate:dimethylallyl pyrophosphate isomerase 2	281	0.1	0.1	0.1	0.1	0.1	4	0.1	3	2
Bra003649	general regulatory factor 2	260	42	41	0.1	45	61	51	55	44	53
Bra039746	cytosolic NADP+-dependent isocitrate dehydrogenase	412	24	27	32	45	65	41	50	0.1	36
Bra000476	NAD-dependent epimerase/dehydratase family protein	262	2	2	0.1	6	7	3	5	0.1	3
Bra006567	germin 3	211	29	25	27	35	35	0.1	38	30	24
Bra018940	myrosinase-binding protein 2	1179	153	175	147	203	172	220	250	189	208
Bra010787	Glutathione S-transferase, C-terminal-like;Translation elongation factor EF1B/ribosomal protein S6	234	12	7	0.1	12	12	11	14	10	10
Bra012807	chloroplast RNA-binding protein 33	313	5	5	4	4	6	3	2	5	5
Bra017855	xyloglucan endotransglucosylase/hydrolase 7	292	8	13	11	10	17	12	26	10	18
Bra028393	oxoprolinase 1	1265	10	9	11	6	11	13	11	16	10
Bra018006	peroxidase CB	354	0.1	2	2	2	3	2	2	3	3
Bra013602	Plastid-lipid associated protein PAP / fibrillin family protein	319	5	0.1	5	7	7	7	6	4	7
Bra018112	Galactose mutarotase-like superfamily protein	357	2	0.1	2	5	7	5	8	0.1	3
Bra009181	2-cysteine peroxiredoxin B	269	46	50	56	68	89	63	78	77	57
Bra030297	SUMO-activating enzyme 2	627	0.1	0.1	0.1	2	0.1	3	0.1	4	0.1
Bra004778	Plant stearoyl-acyl-carrier-protein desaturase family protein	401	0.1	14	0.1	10	0.1	12	11	6	9
Bra036763	Ribosomal protein L21	203	4	6	5	5	5	6	4	7	3
Bra009922	Threonyl-tRNA synthetase	718	0.1	2	3	0.1	5	4	4	9	5
Bra029752	Ribosomal protein L10 family protein	323	0.1	46	27	47	44	44	37	39	37
Bra016590	Protein phosphatase 2A, regulatory subunit PR55	479	0.1	0.1	0.1	2	0.1	3	0.1	0.1	4
Bra036168	Lactoylglutathione lyase / glyoxalase I family protein	155	3	0.1	0.1	3	3	2	6	0.1	3
Bra023845	Pyridoxal phosphate (PLP)-dependent transferases superfamily protein	501	3	5	3	10	6	0.1	10	8	8
Bra032951	NAD(P)-binding Rossmann-fold superfamily protein	291	2	4	2	0.1	10	2	8	5	4
Bra013863	Fe superoxide dismutase 1	212	13	0.1	15	12	19	16	20	18	17
Bra008159	alpha/beta-Hydrolases superfamily protein	373	0.1	2	2	4	10	2	2	0.1	4
Bra034943	SKU5-similar 6	542	9	13	9	13	17	9	17	0.1	10
Bra027452	Sugar isomerase (SIS) family protein	542	7	5	8	10	14	9	13	8	7
Bra029780	Ribosomal protein L4/L1 family	406	23	29	14	27	0.1	26	29	18	24
Bra014131	Ribosomal L18p/L5e family protein	171	5	5	2	5	2	3	3	5	0.1
Bra011884	fructose-bisphosphate aldolase 2	409	0.1	0.1	0.1	0.1	0.1	0.1	0.1	137	0.1
Bra023564	thioredoxin F2	187	2	3	3	4	0.1	3	4	3	3
Bra033975	alpha-fucosidase 1	440	0.1	2	6	8	11	5	6	0.1	4
Bra016487	Pseudouridine synthase/archaeosine transglycosylase-like family protein	431	4	4	6	5	0.1	6	0.1	2	3
Bra030951	Lactate/malate dehydrogenase family protein	341	28	31	21	45	38	35	44	35	32
Bra038640	gamma carbonic anhydrase like 1	252	5	5	0.1	3	3	3	6	10	6
Bra040213	glyceraldehyde-3-phosphate dehydrogenase C2	338	102	119	114	149	158	141	163	124	125
Bra025225	Glycosyl hydrolase family 38 protein	1021	6	6	2	7	11	8	6	9	6
Bra017051	delta1-pyrroline-5-carboxylate synthase 1	717	0.1	0.1	0.1	0.1	0.1	0.1	0.1	45	0.1
Bra000334	unknown protein;	281	5	0.1	4	5	6	4	8	5	5
Bra027338	Aldolase-type TIM barrel family protein	370	0.1	86	88	110	99	107	97	88	86
Bra007555	Transketolase	738	170	195	176	221	242	250	224	224	175
Bra026948	glyceraldehyde 3-phosphate dehydrogenase A subunit 2	399	0.1	0.1	0.1	0.1	0.1	0.1	0.1	0.1	171
Bra007912	beta carbonic anhydrase 4	258	9	0.1	8	20	27	15	13	0.1	11
Bra030300	vacuolar proton ATPase A2	818	8	8	6	13	0.1	9	9	12	12
Bra016134	Rieske (2Fe-2S) domain-containing protein	561	20	21	24	23	29	25	27	26	18
Bra003928	serine hydroxymethyltransferase 2	1113	0.1	0.1	0.1	0.1	0.1	0.1	0.1	23	0.1
Bra008698	casein lytic proteinase B3	973	0.1	0.1	0.1	0.1	0.1	0.1	0.1	21	0.1
Bra017461	Ribosomal protein L30/L7 family protein	242	0.1	0.1	0.1	0.1	0.1	0.1	0.1	19	0.1
Bra014713	Heat shock protein 70 (Hsp 70) family protein	814	27	36	21	37	37	42	38	42	0.1
Bra006768	HEAT/U-box domain-containing protein	2093	0.1	0.1	0.1	0.1	0.1	0.1	0.1	18	0.1
Bra017204	Ribosomal protein L11 family protein	166	0.1	0.1	0.1	0.1	0.1	0.1	0.1	16	0.1
Bra021611	ubiquitin-activating enzyme 1	1047	0.1	0.1	0.1	0.1	0.1	0.1	0.1	15	0.1
Bra020572	Tubulin/FtsZ family protein	468	52	60	39	71	75	68	70	45	59
Bra030922	regulatory particle triple-A 1A	426	7	7	7	6	5	7	8	0.1	8
Bra014720	sedoheptulose-bisphosphatase	394	0.1	0.1	0.1	0.1	0.1	0.1	0.1	0.1	42
Bra033217	mago nashi family protein	102	0.1	0.1	0.1	0.1	2	2	0.1	4	0.1
Bra010681	S-adenosylmethionine carrier 1	383	3	6	0.1	5	7	6	6	4	3
Bra028543	Aldolase superfamily protein	358	64	56	0.1	67	78	60	71	57	75
Bra011036	cruciferin 3	500	0.1	0.1	0.1	0.1	0.1	0.1	0.1	9	0.1
Bra032254	Stabilizer of iron transporter SufD / Polynucleotidyl transferase	1111	0.1	0.1	0.1	0.1	0.1	0.1	0.1	9	0.1
Bra030388	Coatomer, beta' subunit	926	0.1	0.1	0.1	0.1	0.1	0.1	0.1	9	0.1
Bra028666	hydroxymethylbilane synthase	380	0.1	0.1	0.1	0.1	0.1	0.1	0.1	9	0.1
Bra026186	semialdehyde dehydrogenase family protein	375	0.1	0.1	0.1	0.1	0.1	0.1	0.1	8	0.1
Bra007326	villin 3	970	0.1	0.1	0.1	0.1	0.1	0.1	0.1	8	0.1
Bra010292	xyloglucan endotransglucosylase/hydrolase 24	212	0.1	0.1	0.1	0.1	0.1	0.1	0.1	8	0.1
Bra021984	RAB GTPase homolog A1C	216	0.1	0.1	0.1	0.1	0.1	0.1	0.1	8	0.1
Bra021720	ARM repeat superfamily protein	1028	2	4	2	2	0.1	5	3	3	3
Bra006934	alpha/beta-Hydrolases superfamily protein	498	0.1	0.1	0.1	0.1	0.1	0.1	0.1	0.1	27
Bra009298	Eukaryotic aspartyl protease family protein	439	8	9	0.1	9	11	11	10	7	13
Bra010483	31-kDa RNA binding protein	295	16	18	11	24	24	20	24	17	18
Bra009710	tubulin beta 8	449	75	83	58	92	112	0.1	77	71	88
Bra035054	Ribosomal protein L13 family protein	240	6	10	6	7	10	5	7	8	7
Bra029249	H(+)-ATPase 11	1173	16	18	14	12	11	18	0.1	18	16
Bra039688	regulatory particle triple-A 1A	426	0.1	0.1	0.1	0.1	0.1	0.1	0.1	6	0.1
Bra001302	Ribosomal protein L4/L1 family	406	0.1	0.1	0.1	0.1	0.1	0.1	0.1	6	0.1
Bra010299	H(+)-ATPase 2	939	0.1	0.1	0.1	0.1	36	0.1	0.1	0.1	0.1
Bra021795	alpha/beta-Hydrolases superfamily protein	239	0.1	0.1	0.1	0.1	0.1	0.1	0.1	5	0.1
Bra029628	glucan synthase-like 10	1913	0.1	0.1	0.1	0.1	0.1	0.1	0.1	5	0.1
Bra024203	Nucleic acid-binding, OB-fold-like protein	149	0.1	0.1	0.1	0.1	0.1	0.1	0.1	5	0.1
Bra038092	cytochrome P450, family 97, subfamily B, polypeptide 3	566	0.1	0.1	0.1	0.1	0.1	0.1	0.1	5	0.1
Bra013309	L-Aspartase-like family protein	533	0.1	0.1	0.1	0.1	0.1	0.1	0.1	5	0.1
Bra007104	Ras-related small GTP-binding family protein	278	0.1	0.1	0.1	0.1	0.1	0.1	0.1	5	0.1
Bra006664	voltage dependent anion channel 1	276	6	4	3	6	7	8	5	6	5
Bra008474	tetratricopeptide repeat (TPR)-containing protein	1274	0.1	6	3	0.1	4	4	4	11	7
Bra007513	DYNAMIN-like 1E	625	0.1	3	0.1	4	0.1	3	2	3	2
Bra024815	cullin-associated and neddylation dissociated	1223	0.1	0.1	0.1	0.1	0.1	0.1	0.1	4	0.1
Bra022091	RNA helicase, putative	1205	0.1	0.1	0.1	0.1	0.1	0.1	0.1	4	0.1
Bra026183	nucleoporin 155	1458	0.1	0.1	0.1	0.1	0.1	0.1	0.1	4	0.1
Bra028531	transcription regulators	2333	0.1	0.1	0.1	0.1	0.1	0.1	0.1	4	0.1
Bra035762	ubiquitin-specific protease 14	797	0.1	0.1	0.1	0.1	0.1	0.1	0.1	4	0.1
Bra014068	20S proteasome alpha subunit F2	270	0.1	0.1	0.1	0.1	0.1	0.1	0.1	4	0.1
Bra040699	DEAD box RNA helicase 1	609	0.1	0.1	0.1	0.1	0.1	0.1	0.1	4	0.1
Bra013012	acyl-activating enzyme 17	764	0.1	0.1	0.1	0.1	0.1	0.1	0.1	4	0.1
Bra033222	transcription regulators	2419	0.1	0.1	0.1	0.1	0.1	0.1	0.1	4	0.1
Bra003149	RAB GTPase homolog 8	269	0.1	0.1	0.1	0.1	0.1	0.1	0.1	0.1	12
Bra038628	adenylate kinase 1	240	0.1	0.1	0.1	0.1	0.1	0.1	0.1	0.1	12
Bra030706	ascorbate peroxidase 1	250	0.1	0.1	0.1	0.1	0.1	0.1	0.1	0.1	10
Bra011292	O-methyltransferase family protein	373	6	6	5	9	10	6	14	7	7
Bra006517	tubulin alpha-5	450	0.1	0.1	0.1	65	0.1	0.1	0.1	0.1	0.1
Bra004210	little nuclei1	1067	0.1	0.1	0.1	0.1	0.1	0.1	0.1	3	0.1
Bra023813	cupin family protein	486	0.1	0.1	0.1	0.1	0.1	0.1	0.1	3	0.1
Bra015768	Small nuclear ribonucleoprotein family protein	127	0.1	0.1	0.1	0.1	0.1	0.1	0.1	3	0.1
Bra014871	phospholipase D gamma 1	847	0.1	0.1	0.1	0.1	0.1	0.1	0.1	3	0.1
Bra031093	Ribosomal L28e protein family	143	0.1	0.1	0.1	0.1	0.1	0.1	0.1	3	0.1
Bra003745	Histone superfamily protein	136	0.1	0.1	0.1	0.1	0.1	0.1	0.1	3	0.1
Bra018412	O-acyltransferase (WSD1-like) family protein	424	0.1	0.1	0.1	0.1	0.1	0.1	0.1	3	0.1
Bra030262	binding	2156	0.1	0.1	0.1	0.1	0.1	0.1	0.1	3	0.1
Bra031021	Threonyl-tRNA synthetase	577	0.1	0.1	0.1	0.1	0.1	0.1	0.1	3	0.1
Bra019045	proton pump interactor 1	605	0.1	0.1	0.1	0.1	0.1	0.1	0.1	3	0.1
Bra025827	acyl activating enzyme 1	552	0.1	0.1	0.1	0.1	0.1	0.1	0.1	3	0.1
Bra004114	global transcription factor group B1	1594	0.1	0.1	0.1	0.1	0.1	0.1	0.1	3	0.1
Bra012734	unknown protein;	820	0.1	0.1	0.1	0.1	0.1	0.1	0.1	3	0.1
Bra033721	RmlC-like cupins superfamily protein	485	0.1	0.1	0.1	0.1	0.1	0.1	0.1	3	0.1
Bra037177	|	144	0.1	0.1	0.1	0.1	0.1	0.1	0.1	3	0.1
Bra008240	Prolyl oligopeptidase family protein	728	0.1	0.1	0.1	0.1	0.1	0.1	0.1	3	0.1
Bra014390	NAD(P)-binding Rossmann-fold superfamily protein	437	0.1	0.1	0.1	0.1	0.1	0.1	0.1	3	0.1
Bra009184	NDR1/HIN1-like 3	237	0.1	0.1	0.1	0.1	0.1	0.1	0.1	3	0.1
Bra039679	Heat shock protein 70 (Hsp 70) family protein	818	31	38	26	39	46	45	45	43	45
Bra013819	phosphoglucose isomerase 1	616	0.1	0.1	0.1	0.1	17	0.1	0.1	0.1	0.1
Bra013123	basic pathogenesis-related protein 1	161	0.1	0.1	0.1	0.1	16	0.1	0.1	0.1	0.1
Bra036007	HAD superfamily, subfamily IIIB acid phosphatase	273	0.1	0.1	0.1	0.1	0.1	0.1	0.1	0.1	7
Bra001207	Oxidoreductase, zinc-binding dehydrogenase family protein	329	2	0.1	2	2	3	2	4	2	2
Bra025459	tRNA synthetase class I (I, L, M and V) family protein	1175	6	10	7	6	11	8	11	10	8
Bra029733	ARM repeat superfamily protein	872	10	7	4	6	6	6	6	9	7
Bra026080	unknown protein;	269	0.1	0.1	0.1	0.1	13	0.1	0.1	0.1	0.1
Bra014601	Calcium-dependent lipid-binding (CaLB domain) plant phosphoribosyltransferase family protein	778	0.1	0.1	0.1	0.1	0.1	0.1	0.1	0.1	6
Bra021733	genomes uncoupled 1	1098	0.1	0.1	0.1	0.1	0.1	0.1	0.1	0.1	6
Bra006262	Isocitrate/isopropylmalate dehydrogenase family protein	483	0.1	0.1	0.1	0.1	0.1	0.1	0.1	0.1	6
Bra000897	Minichromosome maintenance (MCM2/3/5) family protein	718	0.1	0.1	0.1	0.1	0.1	0.1	0.1	2	0.1
Bra012746	MutT/nudix family protein	277	0.1	0.1	0.1	0.1	0.1	0.1	0.1	2	0.1
Bra008876	dicarboxylate transporter 1	297	0.1	0.1	0.1	0.1	0.1	0.1	0.1	2	0.1
Bra015889	plastid transcriptionally active 2	864	0.1	0.1	0.1	0.1	0.1	0.1	0.1	2	0.1
Bra021872	P-loop containing nucleoside triphosphate hydrolases superfamily protein	659	0.1	0.1	0.1	0.1	0.1	0.1	0.1	2	0.1
Bra002672	unknown protein;	918	0.1	0.1	0.1	0.1	0.1	0.1	0.1	2	0.1
Bra013653	PGR5-LIKE A	319	0.1	0.1	0.1	0.1	0.1	0.1	0.1	2	0.1
Bra035649	autoinhibited Ca2+ -ATPase, isoform 8	1076	0.1	0.1	0.1	0.1	0.1	0.1	0.1	2	0.1
Bra005377	Trimeric LpxA-like enzyme	725	0.1	0.1	0.1	0.1	0.1	0.1	0.1	2	0.1
Bra009461	limit dextrinase	1334	0.1	0.1	0.1	0.1	0.1	0.1	0.1	2	0.1
Bra024832	low-molecular-weight cysteine-rich 69	77	0.1	0.1	0.1	0.1	0.1	0.1	0.1	2	0.1
Bra024021	DDB1-CUL4 associated factor 1	1800	0.1	0.1	0.1	0.1	0.1	0.1	0.1	2	0.1
Bra028867	Ribosomal L29 family protein	123	0.1	0.1	0.1	0.1	0.1	0.1	0.1	2	0.1
Bra002537	exocyst subunit exo70 family protein H7	628	0.1	0.1	0.1	0.1	0.1	0.1	0.1	2	0.1
Bra003027	early nodulin-like protein 1	294	0.1	0.1	0.1	0.1	0.1	0.1	0.1	2	0.1
Bra008046	translocase inner membrane subunit 23-2	188	0.1	0.1	0.1	0.1	0.1	0.1	0.1	2	0.1
Bra027280	GroES-like zinc-binding alcohol dehydrogenase family protein	365	0.1	0.1	0.1	0.1	0.1	0.1	0.1	2	0.1
Bra000600	zinc knuckle (CCHC-type) family protein	1092	0.1	0.1	0.1	0.1	0.1	0.1	0.1	2	0.1
Bra025922	HCP-like superfamily protein	678	0.1	0.1	0.1	0.1	0.1	0.1	0.1	2	0.1
Bra028112	microsomal glutathione s-transferase, putative	145	0.1	0.1	0.1	0.1	0.1	0.1	0.1	2	0.1
Bra033531	arabinose kinase	889	0.1	0.1	0.1	0.1	0.1	0.1	0.1	2	0.1
Bra008279	eukaryotic translation initiation factor 2 (eIF-2) family protein	1268	0.1	0.1	0.1	0.1	0.1	0.1	0.1	2	0.1
Bra015687	chromatin protein family	610	0.1	0.1	0.1	0.1	0.1	0.1	0.1	2	0.1
Bra019993	cell division cycle 5	844	0.1	0.1	0.1	0.1	0.1	0.1	0.1	2	0.1
Bra023277	2Fe-2S ferredoxin-like superfamily protein	179	0.1	0.1	0.1	0.1	0.1	0.1	0.1	2	0.1
Bra006090	sucrose phosphate synthase 2F	1039	0.1	0.1	0.1	0.1	0.1	0.1	0.1	2	0.1
Bra037439	tRNA synthetase class I (I, L, M and V) family protein	1084	0.1	0.1	0.1	0.1	0.1	0.1	0.1	2	0.1
Bra000810	thioredoxin family protein	476	0.1	0.1	0.1	0.1	0.1	0.1	0.1	2	0.1
Bra016687	Endomembrane protein 70 protein family	589	0.1	0.1	0.1	0.1	0.1	0.1	0.1	2	0.1
Bra032657	Cyclophilin-like peptidyl-prolyl cis-trans isomerase family protein	160	0.1	0.1	0.1	0.1	0.1	0.1	0.1	2	0.1
Bra032695	unknown protein;	197	0.1	0.1	0.1	0.1	0.1	0.1	0.1	2	0.1
Bra037760	Inositol monophosphatase family protein	358	0.1	0.1	0.1	0.1	0.1	0.1	0.1	2	0.1
Bra026393	HIS HF	581	0.1	0.1	0.1	0.1	0.1	0.1	0.1	2	0.1
Bra026475	unknown protein;	229	0.1	0.1	0.1	0.1	0.1	0.1	0.1	2	0.1
Bra027178	ENTH/VHS family protein	695	0.1	0.1	0.1	0.1	0.1	0.1	0.1	2	0.1
Bra031994	DegP protease 7	1095	0.1	0.1	0.1	0.1	0.1	0.1	0.1	2	0.1
Bra035989	NAD(P)H dehydrogenase 18	222	0.1	0.1	0.1	0.1	0.1	0.1	0.1	2	0.1
Bra000031	SOUL heme-binding family protein	200	0.1	0.1	0.1	0.1	0.1	0.1	0.1	2	0.1
Bra023199	Adaptin family protein	938	0.1	0.1	0.1	0.1	0.1	0.1	0.1	2	0.1
Bra002432	magnesium (Mg) transporter 10	467	0.1	0.1	0.1	0.1	0.1	0.1	0.1	2	0.1
Bra027011	Tim10/DDP family zinc finger protein	93	0.1	0.1	0.1	0.1	0.1	0.1	0.1	2	0.1
Bra001500	proteasome activating protein 200	1806	0.1	0.1	0.1	0.1	0.1	0.1	0.1	2	0.1
Bra013182	Nucleoporin, Nup133/Nup155-like	1287	0.1	0.1	0.1	0.1	0.1	0.1	0.1	2	0.1
Bra024240	Glycosyl hydrolases family 31 protein	921	0.1	0.1	0.1	0.1	0.1	0.1	0.1	2	0.1
Bra028392	FTSH protease 3	812	0.1	0.1	0.1	0.1	0.1	0.1	0.1	2	0.1
Bra018379	tubulin beta-7 chain	449	0.1	0.1	0.1	0.1	0.1	103	0.1	0.1	0.1
Bra015940	Ribosomal protein L6 family protein	233	0.1	0.1	0.1	0.1	12	0.1	0.1	0.1	0.1
Bra029549	NAD(P)H dehydrogenase B2	579	0.1	0.1	0.1	0.1	0.1	0.1	0.1	0.1	5
Bra003840	S-adenosyl-L-methionine-dependent methyltransferases superfamily protein	506	0.1	0.1	0.1	0.1	0.1	0.1	0.1	0.1	5
Bra032101	40s ribosomal protein SA	292	21	29	0.1	32	35	29	24	17	28
Bra015170	20S proteasome subunit PAA2	246	11	9	8	11	12	10	13	10	5
Bra009441	sulfite reductase	647	14	17	17	24	19	0.1	17	12	16
Bra035320	allene oxide synthase	529	0.1	2	4	8	7	7	6	0.1	8
Bra035076	vacuolar H+-pyrophosphatase 2	802	0.1	0.1	0.1	0.1	0.1	0.1	0.1	0.1	4
Bra020394	SNARE-like superfamily protein	199	0.1	0.1	0.1	0.1	0.1	0.1	0.1	0.1	4
Bra031624	photosystem I subunit O	145	0.1	0.1	7	12	14	0.1	12	3	3
Bra003426	Transketolase	462	0.1	0.1	0.1	0.1	0.1	53	0.1	0.1	0.1
Bra022151	binding	1779	0.1	3	0.1	2	2	4	0.1	6	3
Bra021614	Subtilase family protein	757	0.1	0.1	0.1	0.1	7	0.1	0.1	0.1	0.1
Bra011813	Histone superfamily protein	116	0.1	0.1	0.1	0.1	0.1	0.1	0.1	0.1	3
Bra004938	phosphomannomutase	246	0.1	0.1	0.1	0.1	0.1	0.1	0.1	0.1	3
Bra015393	Calcium-binding tetratricopeptide family protein	811	0.1	0.1	0.1	0.1	0.1	0.1	0.1	0.1	3
[truncated: 1,012 more rows]
