# Supplementary material for: Shotgun Quantitative Proteomic Analysis of Proteins Responding to Drought Stress in Brassica rapa L. (Inbred Line “Chiifu”)
Source: Int J Genomics. 2016 Jun 21;2016:4235808. doi: 10.1155/2016/4235808 (PMC4932182; doi:10.1155/2016/4235808)
Supplement: Supplementary file 1 — Supplementary table 1. List of total 3,009 identified non-redundant proteins. Supplementary table 2. List of identified non-redundant proteins from each sample. Supplementary table 3. Relative expression amount of the 1,567 proteins among the treatments and replications. Supplementary table 4. Relative amount of 440 differentially expressed proteins. Supplementary table 5. Average of relative amount of proteins in each groups. Supplementary table 6. Enriched GO terms of proteins in each groups. [file 4235808.f1.zip › sup.table S2.xlsx]

## Sheet: B.rapa_0hr drought treatment 1
Accession	Description	Score	Coverage	# Proteins	# Unique Peptides	# Peptides	# PSMs	# AAs	MW [kDa]	calc. pI
Bra028087	ribulose-bisphosphate carboxylases	3274.45	66.18	1	25	35	859	479	52.9225	6.29053
	Confidence Level	Sequence	PSM Ambiguity	# Proteins	# Protein Groups	Protein Group Accessions	Modifications	Activation Type	ΔScore	ΔCn	Rank	Search Engine Rank	Peptides Matched	XCorr	Probability	# Missed Cleavages	Isolation Interference [%]	Ion Inject Time [ms]	Charge	m/z [Da]	MH+ [Da]	ΔM [ppm]	RT [min]	First Scan	Last Scan	MS Order	Ions Matched	Spectrum File
	High	VTPQPGVPPEEAGAAVAAESSTGTWTTVWTDGLTSLDR	Unambiguous	1	1	Bra028087		HCD	1	0	1	1	432	7.68738	0	0	0	22	3	1285.63	3854.87	-0.460938	60.9337	34162	34162	MS2	34/148	20130120_Brassica_A3.raw
	High	VTPQPGVPPEEAGAAVAAESSTGTWTTVWTDGLTSLDR	Unambiguous	1	1	Bra028087		HCD	1	0	1	1	432	7.67306	0	0	0	33	3	1285.63	3854.87	-0.365938	55.0528	30871	30871	MS2	34/148	20130120_Brassica_A3.raw
	High	VTPQPGVPPEEAGAAVAAESSTGTWTTVWTDGLTSLDR	Unambiguous	1	1	Bra028087		HCD	1	0	1	1	427	7.55541	0	0	0	19	3	1285.63	3854.87	-0.270938	57.4488	32209	32209	MS2	38/148	20130120_Brassica_A3.raw
	High	VTPQPGVPPEEAGAAVAAESSTGTWTTVWTDGLTSLDR	Unambiguous	1	1	Bra028087		HCD	1	0	1	1	346	7.48256	0	0	71.1364	38	2	1927.94	3854.87	-1.13828	52.5312	29466	29466	MS2	34/74	20130120_Brassica_A3.raw
	High	VTPQPGVPPEEAGAAVAAESSTGTWTTVWTDGLTSLDR	Unambiguous	1	1	Bra028087		HCD	1	0	1	1	422	7.40972	0	0	0	21	3	1285.63	3854.87	-0.555937	53.4823	29996	29996	MS2	37/148	20130120_Brassica_A3.raw
	High	VTPQPGVPPEEAGAAVAAESSTGTWTTVWTDGLTSLDR	Unambiguous	1	1	Bra028087		HCD	1	0	1	1	445	7.37715	0	0	0	3	3	1285.63	3854.88	1.24905	52.4331	29410	29410	MS2	37/148	20130120_Brassica_A3.raw
	High	VTPQPGVPPEEAGAAVAAESSTGTWTTVWTDGLTSLDR	Unambiguous	1	1	Bra028087		HCD	1	0	1	1	421	7.29157	0	0	0	29	3	1285.63	3854.87	-0.840936	55.3222	31021	31021	MS2	33/148	20130120_Brassica_A3.raw
	High	VTPQPGVPPEEAGAAVAAESSTGTWTTVWTDGLTSLDR	Unambiguous	1	1	Bra028087		HCD	0.6212	0	1	1	419	7.26033	0	0	0.320628	50	3	1285.63	3854.87	-0.650937	67.4275	37826	37826	MS2	36/148	20130120_Brassica_A3.raw
	High	ELGVPIVmHDYLTGGFTANTSLAHYcR	Unambiguous	1	1	Bra028087	M8(Oxidation); C26(Carbamidomethyl)	HCD	1	0	1	1	409	7.12583	0	0	2.25616	43	3	1013.49	3038.46	3.47021	91.5645	51392	51392	MS2	39/104	20130120_Brassica_A3.raw
	High	VTPQPGVPPEEAGAAVAAESSTGTWTTVWTDGLTSLDR	Unambiguous	1	1	Bra028087		HCD	1	0	1	1	421	7.11134	0	0	0	50	3	1285.63	3854.86	-1.88593	52.1667	29262	29262	MS2	38/148	20130120_Brassica_A3.raw
	High	VTPQPGVPPEEAGAAVAAESSTGTWTTVWTDGLTSLDR	Unambiguous	1	1	Bra028087		HCD	1	0	1	1	432	7.07562	0	0	0.887617	27	3	1285.63	3854.87	-0.365938	60.6637	34011	34011	MS2	36/148	20130120_Brassica_A3.raw
	High	VTPQPGVPPEEAGAAVAAESSTGTWTTVWTDGLTSLDR	Unambiguous	1	1	Bra028087		HCD	1	0	1	1	439	7.0576	0	0	0	22	3	1285.63	3854.87	0.394058	60.4053	33865	33865	MS2	38/148	20130120_Brassica_A3.raw
	High	VTPQPGVPPEEAGAAVAAESSTGTWTTVWTDGLTSLDR	Unambiguous	1	1	Bra028087		HCD	1	0	1	1	427	7.05717	0	0	1.66169	36	3	1285.63	3854.87	-0.270938	92.0414	51658	51658	MS2	34/148	20130120_Brassica_A3.raw
	High	VTPQPGVPPEEAGAAVAAESSTGTWTTVWTDGLTSLDR	Unambiguous	1	1	Bra028087		HCD	1	0	1	1	428	7.04745	0	0	0.835487	35	3	1285.63	3854.87	-0.460938	54.2567	30427	30427	MS2	36/148	20130120_Brassica_A3.raw
	High	VTPQPGVPPEEAGAAVAAESSTGTWTTVWTDGLTSLDR	Unambiguous	1	1	Bra028087		HCD	0.6254	0	1	1	442	7.023	0	0	38.4822	50	3	1285.63	3854.87	0.515328	68.2142	38266	38266	MS2	37/148	20130120_Brassica_A3.raw
	High	VTPQPGVPPEEAGAAVAAESSTGTWTTVWTDGLTSLDR	Unambiguous	1	1	Bra028087		HCD	1	0	1	1	419	6.99513	0	0	0	37	3	1285.63	3854.87	-1.12594	52.2928	29206	29206	MS2	38/148	20130120_Brassica_A4.raw
	High	VTPQPGVPPEEAGAAVAAESSTGTWTTVWTDGLTSLDR	Unambiguous	1	1	Bra028087		HCD	1	0	1	1	426	6.94075	0	0	0.598132	20	3	1285.63	3854.87	-0.175939	58.2415	32653	32653	MS2	33/148	20130120_Brassica_A3.raw
	High	VTPQPGVPPEEAGAAVAAESSTGTWTTVWTDGLTSLDR	Unambiguous	1	1	Bra028087		HCD	1	0	1	1	420	6.86276	0	0	0.479389	50	3	1285.63	3854.87	-0.745936	59.253	33219	33219	MS2	35/148	20130120_Brassica_A3.raw
	High	VTPQPGVPPEEAGAAVAAESSTGTWTTVWTDGLTSLDR	Unambiguous	1	1	Bra028087		HCD	1	0	1	1	439	6.86003	0	0	0.671783	23	3	1285.63	3854.87	0.394058	63.9108	35841	35841	MS2	35/148	20130120_Brassica_A3.raw
	High	VTPQPGVPPEEAGAAVAAESSTGTWTTVWTDGLTSLDR	Unambiguous	1	1	Bra028087		HCD	1	0	1	1	419	6.85804	0	0	0	9	3	1285.63	3854.87	-1.12594	52.6936	29557	29557	MS2	38/148	20130120_Brassica_A3.raw
	High	VTPQPGVPPEEAGAAVAAESSTGTWTTVWTDGLTSLDR	Unambiguous	1	1	Bra028087		HCD	1	0	1	1	360	6.83396	0	0	21.0441	50	2	1927.94	3854.87	-0.012201	63.584	35656	35656	MS2	30/74	20130120_Brassica_A3.raw
	High	VTPQPGVPPEEAGAAVAAESSTGTWTTVWTDGLTSLDR	Unambiguous	1	1	Bra028087		HCD	1	0	1	1	433	6.79956	0	0		34	3	1285.63	3854.87	-0.455362	53.222	29851	29851	MS2	40/148	20130120_Brassica_A3.raw
	High	VTPQPGVPPEEAGAAVAAESSTGTWTTVWTDGLTSLDR	Unambiguous	1	1	Bra028087		HCD	1	0	1	1	442	6.76485	0	0	0	50	3	1285.63	3854.88	2.19904	74.0799	41570	41570	MS2	33/148	20130120_Brassica_A3.raw
	High	VTPQPGVPPEEAGAAVAAESSTGTWTTVWTDGLTSLDR	Unambiguous	1	1	Bra028087		HCD	1	0	1	1	317	6.75668	0	0	56.4401	50	2	1927.92	3854.84	-8.29498	53.0002	29728	29728	MS2	33/74	20130120_Brassica_A3.raw
	High	VTPQPGVPPEEAGAAVAAESSTGTWTTVWTDGLTSLDR	Unambiguous	1	1	Bra028087		HCD	1	0	1	1	445	6.74218	0	0	0	50	3	1285.63	3854.88	1.34405	69.3097	38881	38881	MS2	39/148	20130120_Brassica_A3.raw
	High	VTPQPGVPPEEAGAAVAAESSTGTWTTVWTDGLTSLDR	Unambiguous	1	1	Bra028087		HCD	1	0	1	1	422	6.73799	0	0	0	16	3	1285.63	3854.87	-0.840936	57.964	32497	32497	MS2	38/148	20130120_Brassica_A3.raw
	High	VTPQPGVPPEEAGAAVAAESSTGTWTTVWTDGLTSLDR	Unambiguous	1	1	Bra028087		HCD	1	0	1	1	442	6.71893	0	0	0	21	3	1285.63	3854.87	0.394058	52.7433	29498	29498	MS2	37/148	20130120_Brassica_A1.raw
	High	VTPQPGVPPEEAGAAVAAESSTGTWTTVWTDGLTSLDR	Unambiguous	1	1	Bra028087		HCD	1	0	1	1	422	6.69621	0	0	2.28665	31	3	1285.63	3854.87	-0.555937	67.9469	38117	38117	MS2	37/148	20130120_Brassica_A3.raw
	High	VTPQPGVPPEEAGAAVAAESSTGTWTTVWTDGLTSLDR	Unambiguous	1	1	Bra028087		HCD	1	0	1	1	430	6.69183	0	0	0	24	3	1285.63	3854.87	-0.365938	54.5201	30574	30574	MS2	37/148	20130120_Brassica_A3.raw
	High	VTPQPGVPPEEAGAAVAAESSTGTWTTVWTDGLTSLDR	Unambiguous	1	1	Bra028087		HCD	1	0	1	1	419	6.68875	0	0	0.825823	44	3	1285.63	3854.87	-0.555937	65.2686	36608	36608	MS2	37/148	20130120_Brassica_A3.raw
	High	VTPQPGVPPEEAGAAVAAESSTGTWTTVWTDGLTSLDR	Unambiguous	1	1	Bra028087		HCD	1	0	1	1	351	6.6819	0	0	8.39246	46	2	1927.93	3854.86	-2.91161	52.4629	29303	29303	MS2	28/74	20130120_Brassica_A4.raw
	High	VTPQPGVPPEEAGAAVAAESSTGTWTTVWTDGLTSLDR	Unambiguous	1	1	Bra028087		HCD	1	0	1	1	437	6.6561	0	0	0	11	3	1285.63	3854.88	1.62905	91.5151	51364	51364	MS2	37/148	20130120_Brassica_A3.raw
	High	VTPQPGVPPEEAGAAVAAESSTGTWTTVWTDGLTSLDR	Unambiguous	1	1	Bra028087		HCD	1	0	1	1	426	6.65582	0	0	0	50	3	1285.63	3854.87	-1.41093	71.4616	40093	40093	MS2	35/148	20130120_Brassica_A3.raw
	High	VTPQPGVPPEEAGAAVAAESSTGTWTTVWTDGLTSLDR	Unambiguous	1	1	Bra028087		HCD	1	0	1	1	430	6.64634	0	0	0	21	3	1285.63	3854.87	-0.365938	62.5531	35074	35074	MS2	39/148	20130120_Brassica_A3.raw
	High	VTPQPGVPPEEAGAAVAAESSTGTWTTVWTDGLTSLDR	Unambiguous	1	1	Bra028087		HCD	1	0	1	1	336	6.64493	0	0	4.06906	47	2	1927.94	3854.86	-1.96161	52.3986	29267	29267	MS2	30/74	20130120_Brassica_A4.raw
	High	VTPQPGVPPEEAGAAVAAESSTGTWTTVWTDGLTSLDR	Unambiguous	1	1	Bra028087		HCD	1	0	1	1	424	6.63629	0	0	14.5159	50	3	1285.63	3854.86	-1.88593	71.191	39942	39942	MS2	36/148	20130120_Brassica_A3.raw
	High	VTPQPGVPPEEAGAAVAAESSTGTWTTVWTDGLTSLDR	Unambiguous	1	1	Bra028087		HCD	1	0	1	1	422	6.61713	0	0	1.92514	41	3	1285.63	3854.87	-0.840936	67.6848	37969	37969	MS2	34/148	20130120_Brassica_A3.raw
	High	VTPQPGVPPEEAGAAVAAESSTGTWTTVWTDGLTSLDR	Unambiguous	1	1	Bra028087		HCD	1	0	1	1	421	6.61283	0	0	2.03897	50	3	1285.63	3854.87	-0.555937	65.6576	36827	36827	MS2	39/148	20130120_Brassica_A3.raw
	High	VTPQPGVPPEEAGAAVAAESSTGTWTTVWTDGLTSLDR	Unambiguous	1	1	Bra028087		HCD	1	0	1	1	346	6.59912	0	0	6.57446	50	2	1927.94	3854.87	-1.45495	52.3703	29289	29289	MS2	31/74	20130120_Brassica_A1.raw
	High	VTPQPGVPPEEAGAAVAAESSTGTWTTVWTDGLTSLDR	Unambiguous	1	1	Bra028087		HCD	1	0	1	1	442	6.58914	0	0	0.994394	39	3	1285.63	3854.88	1.15405	66.3119	37197	37197	MS2	39/148	20130120_Brassica_A3.raw
	High	VTPQPGVPPEEAGAAVAAESSTGTWTTVWTDGLTSLDR	Unambiguous	1	1	Bra028087		HCD	1	0	1	1	422	6.5829	0	0	0	41	3	1285.63	3854.87	-1.12594	92.5597	51946	51946	MS2	40/148	20130120_Brassica_A3.raw
	High	VTPQPGVPPEEAGAAVAAESSTGTWTTVWTDGLTSLDR	Unambiguous	1	1	Bra028087		HCD	1	0	1	1	438	6.5733	0	0	1.58341	26	3	1285.63	3854.87	0.584057	55.5806	31166	31166	MS2	38/148	20130120_Brassica_A3.raw
	High	VTPQPGVPPEEAGAAVAAESSTGTWTTVWTDGLTSLDR	Unambiguous	1	1	Bra028087		HCD	1	0	1	1	440	6.5544	0	0	0	36	3	1285.63	3854.88	2.48404	91.7848	51515	51515	MS2	36/148	20130120_Brassica_A3.raw
	High	VTPQPGVPPEEAGAAVAAESSTGTWTTVWTDGLTSLDR	Unambiguous	1	1	Bra028087		HCD	1	0	1	1	419	6.54485	0	0	0.866538	28	3	1285.63	3854.87	-0.555937	64.9974	36455	36455	MS2	36/148	20130120_Brassica_A3.raw
	High	VTPQPGVPPEEAGAAVAAESSTGTWTTVWTDGLTSLDR	Unambiguous	1	1	Bra028087		HCD	1	0	1	1	426	6.54326	0	0	2.5138	33	3	1285.62	3854.86	-4.16594	69.8489	39187	39187	MS2	35/148	20130120_Brassica_A3.raw
	High	VTPQPGVPPEEAGAAVAAESSTGTWTTVWTDGLTSLDR	Unambiguous	1	1	Bra028087		HCD	1	0	1	1	448	6.49342	0	0	0	50	3	1285.63	3854.88	1.05905	73.8096	41418	41418	MS2	39/148	20130120_Brassica_A3.raw
	High	VTPQPGVPPEEAGAAVAAESSTGTWTTVWTDGLTSLDR	Unambiguous	1	1	Bra028087		HCD	1	0	1	1	427	6.44603	0	0	0.892402	37	3	1285.63	3854.87	-0.460938	69.0372	38729	38729	MS2	38/148	20130120_Brassica_A3.raw
	High	VTPQPGVPPEEAGAAVAAESSTGTWTTVWTDGLTSLDR	Unambiguous	1	1	Bra028087		HCD	1	0	1	1	426	6.41214	0	0	0	34	3	1285.63	3854.87	-0.935936	72.0038	40399	40399	MS2	35/148	20130120_Brassica_A3.raw
	High	VTPQPGVPPEEAGAAVAAESSTGTWTTVWTDGLTSLDR	Unambiguous	1	1	Bra028087		HCD	1	0	1	1	426	6.40895	0	0	0	50	3	1285.63	3854.87	-0.270938	71.7358	40248	40248	MS2	38/148	20130120_Brassica_A3.raw
	High	VTPQPGVPPEEAGAAVAAESSTGTWTTVWTDGLTSLDR	Unambiguous	1	1	Bra028087		HCD	1	0	1	1	433	6.38943	0	0	0	36	3	1285.63	3854.87	-0.175939	67.1582	37674	37674	MS2	37/148	20130120_Brassica_A3.raw
	High	ELGVPIVmHDYLTGGFTANTSLAHYcR	Unambiguous	1	1	Bra028087	M8(Oxidation); C26(Carbamidomethyl)	HCD	0.4874	0	1	1	394	6.35714	0	0	2.53714	35	4	760.369	3038.46	1.71818	91.5284	51371	51371	MS2	40/156	20130120_Brassica_A3.raw
	High	VTPQPGVPPEEAGAAVAAESSTGTWTTVWTDGLTSLDR	Unambiguous	1	1	Bra028087		HCD	1	0	1	1	439	6.35288	0	0	0.819096	24	3	1285.63	3854.87	0.299059	55.8417	31312	31312	MS2	33/148	20130120_Brassica_A3.raw
	High	VTPQPGVPPEEAGAAVAAESSTGTWTTVWTDGLTSLDR	Unambiguous	1	1	Bra028087		HCD	1	0	1	1	353	6.35055	0	0	9.21868	50	2	1927.93	3854.86	-3.10161	52.4723	29307	29307	MS2	29/74	20130120_Brassica_A4.raw
	High	VTPQPGVPPEEAGAAVAAESSTGTWTTVWTDGLTSLDR	Unambiguous	1	1	Bra028087		HCD	1	0	1	1	447	6.34254	0	0	0	50	3	1285.63	3854.88	1.24905	70.3738	39484	39484	MS2	36/148	20130120_Brassica_A3.raw
	High	VTPQPGVPPEEAGAAVAAESSTGTWTTVWTDGLTSLDR	Unambiguous	1	1	Bra028087		HCD	1	0	1	1	427	6.28735	0	0	0	25	3	1285.63	3854.87	-1.50593	62.8264	35229	35229	MS2	36/148	20130120_Brassica_A3.raw
	High	VTPQPGVPPEEAGAAVAAESSTGTWTTVWTDGLTSLDR	Unambiguous	1	1	Bra028087		HCD	1	0	1	1	444	6.28158	0	0	1.49911	21	3	1285.63	3854.87	0.679056	56.6293	31752	31752	MS2	38/148	20130120_Brassica_A3.raw
	High	VTPQPGVPPEEAGAAVAAESSTGTWTTVWTDGLTSLDR	Unambiguous	1	1	Bra028087		HCD	1	0	1	1	433	6.27127	0	0	0	15	3	1285.63	3854.87	-0.0809394	53.7393	30139	30139	MS2	39/148	20130120_Brassica_A3.raw
	High	VTPQPGVPPEEAGAAVAAESSTGTWTTVWTDGLTSLDR	Unambiguous	1	1	Bra028087		HCD	1	0	1	1	431	6.26916	0	0	0	21	3	1285.63	3854.87	-0.460938	63.6158	35674	35674	MS2	35/148	20130120_Brassica_A3.raw
	High	VTPQPGVPPEEAGAAVAAESSTGTWTTVWTDGLTSLDR	Unambiguous	1	1	Bra028087		HCD	1	0	1	1	418	6.25601	0	0	0	6	3	1285.63	3854.87	-1.03094	52.57	29362	29362	MS2	34/148	20130120_Brassica_A4.raw
	High	VTPQPGVPPEEAGAAVAAESSTGTWTTVWTDGLTSLDR	Unambiguous	1	1	Bra028087		HCD	1	0	1	1	425	6.23851	0	0	0.974644	24	3	1285.63	3854.87	-0.270938	57.7067	32353	32353	MS2	38/148	20130120_Brassica_A3.raw
	High	VTPQPGVPPEEAGAAVAAESSTGTWTTVWTDGLTSLDR	Unambiguous	1	1	Bra028087		HCD	1	0	1	1	423	6.23438	0	0	0	15	3	1285.63	3854.87	-0.840936	61.1911	34307	34307	MS2	34/148	20130120_Brassica_A3.raw
	High	VTPQPGVPPEEAGAAVAAESSTGTWTTVWTDGLTSLDR	Unambiguous	1	1	Bra028087		HCD	1	0	1	1	421	6.22069	0	0	0	28	3	1285.63	3854.87	-0.555937	64.7248	36301	36301	MS2	34/148	20130120_Brassica_A3.raw
	High	VTPQPGVPPEEAGAAVAAESSTGTWTTVWTDGLTSLDR	Unambiguous	1	1	Bra028087		HCD	1	0	1	1	427	6.19127	0	0	0	23	3	1285.63	3854.87	-1.41093	62.278	34918	34918	MS2	38/148	20130120_Brassica_A3.raw
	High	VTPQPGVPPEEAGAAVAAESSTGTWTTVWTDGLTSLDR	Unambiguous	1	1	Bra028087		HCD	1	0	1	1	433	6.13525	0	0	0	50	3	1285.63	3854.87	-0.175939	78.7343	44188	44188	MS2	37/148	20130120_Brassica_A3.raw
	High	SQAETGEIKGHYLNATAGTcEEmmKR	Unambiguous	1	1	Bra028087	C20(Carbamidomethyl); M23(Oxidation); M24(Oxidation)	HCD	1	0	1	1	248	6.11456	0	2	2.85294	14	4	736.834	2944.32	-2.86013	25.9002	14293	14293	MS2	36/150	20130120_Brassica_A3.raw
	High	VTPQPGVPPEEAGAAVAAESSTGTWTTVWTDGLTSLDR	Unambiguous	1	1	Bra028087		HCD	1	0	1	1	442	6.10522	0	0	0	16	3	1285.63	3854.88	1.43905	59.8776	33569	33569	MS2	37/148	20130120_Brassica_A3.raw
	High	VTPQPGVPPEEAGAAVAAESSTGTWTTVWTDGLTSLDR	Unambiguous	1	1	Bra028087		HCD	1	0	1	1	422	6.0974	0	0	0	50	3	1285.63	3854.87	-1.79093	52.6819	29442	29442	MS2	35/148	20130120_Brassica_A5.raw
	High	VTPQPGVPPEEAGAAVAAESSTGTWTTVWTDGLTSLDR	Unambiguous	1	1	Bra028087		HCD	1	0	1	1	425	6.0814	0	0	1.6766	22	3	1285.63	3854.87	-1.22093	63.0914	35377	35377	MS2	37/148	20130120_Brassica_A3.raw
	High	ESTLGFVDLLRDDYVEK	Unambiguous	1	1	Bra028087		HCD	1	0	1	1	376	6.07364	0	1	18.1503	50	2	1000	1999	-0.463801	45.085	25304	25304	MS2	22/32	20130120_Brassica_A3.raw
	High	VTPQPGVPPEEAGAAVAAESSTGTWTTVWTDGLTSLDR	Unambiguous	1	1	Bra028087		HCD	1	0	1	1	419	6.07173	0	0	13.0371	50	3	1285.62	3854.86	-3.40593	76.3829	42865	42865	MS2	36/148	20130120_Brassica_A3.raw
	High	GGLDFTKDDENVNSQPFMR	Unambiguous	2	2	Bra028087 ;Bra041116		HCD	1	0	1	1	234	6.06102	0	1	0	42	2	1085.5	2169.99	1.36707	35.9012	20092	20092	MS2	28/36	20130120_Brassica_A3.raw
	High	VTPQPGVPPEEAGAAVAAESSTGTWTTVWTDGLTSLDR	Unambiguous	1	1	Bra028087		HCD	1	0	1	1	434	6.05866	0	0	0	20	3	1285.63	3854.87	-0.0809394	60.1485	33721	33721	MS2	38/148	20130120_Brassica_A3.raw
	High	VTPQPGVPPEEAGAAVAAESSTGTWTTVWTDGLTSLDR	Unambiguous	1	1	Bra028087		HCD	1	0	1	1	430	6.0564	0	0	0	22	3	1285.63	3854.87	-0.0809394	61.4677	34463	34463	MS2	35/148	20130120_Brassica_A3.raw
	High	VTPQPGVPPEEAGAAVAAESSTGTWTTVWTDGLTSLDR	Unambiguous	1	1	Bra028087		HCD	1	0	1	1	441	6.02011	0	0	0	50	3	1285.63	3854.88	1.43905	78.9903	44332	44332	MS2	37/148	20130120_Brassica_A3.raw
	High	VTPQPGVPPEEAGAAVAAESSTGTWTTVWTDGLTSLDR	Unambiguous	1	1	Bra028087		HCD	1	0	1	1	420	5.99277	0	0	0	19	3	1285.63	3854.87	-0.650937	59.6052	33416	33416	MS2	40/148	20130120_Brassica_A3.raw
	High	VTPQPGVPPEEAGAAVAAESSTGTWTTVWTDGLTSLDR	Unambiguous	1	1	Bra028087		HCD	1	0	1	1	439	5.99197	0	0	1.02698	20	3	1285.63	3854.87	0.0140601	58.5281	32813	32813	MS2	36/148	20130120_Brassica_A3.raw
	High	VTPQPGVPPEEAGAAVAAESSTGTWTTVWTDGLTSLDR	Unambiguous	1	1	Bra028087		HCD	1	0	1	1	371	5.97587	0	0	34.9736	50	2	1927.94	3854.87	0.4807	52.5622	29396	29396	MS2	26/74	20130120_Brassica_A1.raw
	High	VTPQPGVPPEEAGAAVAAESSTGTWTTVWTDGLTSLDR	Unambiguous	1	1	Bra028087		HCD	1	0	1	1	434	5.96774	0	0	0.451872	3	3	1285.64	3854.9	6.09399	52.6067	29358	29358	MS2	39/148	20130120_Brassica_A2.raw
	High	VTPQPGVPPEEAGAAVAAESSTGTWTTVWTDGLTSLDR	Unambiguous	1	1	Bra028087		HCD	1	0	1	1	423	5.96585	0	0	0	7	3	1285.63	3854.87	-1.22093	52.9632	29707	29707	MS2	38/148	20130120_Brassica_A3.raw
	High	VTPQPGVPPEEAGAAVAAESSTGTWTTVWTDGLTSLDR	Unambiguous	1	1	Bra028087		HCD	1	0	1	1	439	5.96423	0	0	0	27	3	1285.63	3854.87	0.394058	52.37	29267	29267	MS2	37/148	20130120_Brassica_A5.raw
	High	ESTLGFVDLLRDDYVEK	Unambiguous	1	1	Bra028087		HCD	1	0	1	1	370	5.93208	0	1	4.98823	50	2	1000.01	1999	0.696446	45.5558	25476	25476	MS2	22/32	20130120_Brassica_A1.raw
	High	VTPQPGVPPEEAGAAVAAESSTGTWTTVWTDGLTSLDR	Unambiguous	1	1	Bra028087		HCD	1	0	1	1	422	5.92762	0	0	0	31	3	1285.63	3854.87	-1.12594	92.3	51802	51802	MS2	35/148	20130120_Brassica_A3.raw
	High	VTPQPGVPPEEAGAAVAAESSTGTWTTVWTDGLTSLDR	Unambiguous	1	1	Bra028087		HCD	1	0	1	1	428	5.92246	0	0	0	50	3	1285.64	3854.89	5.809	52.8761	29509	29509	MS2	35/148	20130120_Brassica_A2.raw
	High	VTPQPGVPPEEAGAAVAAESSTGTWTTVWTDGLTSLDR	Unambiguous	1	1	Bra028087		HCD	1	0	1	1	443	5.91657	0	0	29.1181	50	3	1285.63	3854.88	0.820547	78.4791	44044	44044	MS2	39/148	20130120_Brassica_A3.raw
	High	ELGVPIVmHDYLTGGFTANTSLAHYcR	Unambiguous	1	1	Bra028087	M8(Oxidation); C26(Carbamidomethyl)	HCD	1	0	1	1	414	5.90857	0	0	0	50	3	1013.49	3038.46	4.85625	41.4517	23105	23105	MS2	36/104	20130120_Brassica_A2.raw
	High	VTPQPGVPPEEAGAAVAAESSTGTWTTVWTDGLTSLDR	Unambiguous	1	1	Bra028087		HCD	1	0	1	1	440	5.90231	0	0	2.06457	26	3	1285.63	3854.87	0.204059	56.3691	31606	31606	MS2	36/148	20130120_Brassica_A3.raw
	High	VTPQPGVPPEEAGAAVAAESSTGTWTTVWTDGLTSLDR	Unambiguous	1	1	Bra028087		HCD	1	0	1	1	425	5.89566	0	0	0	50	3	1285.63	3854.87	-1.50593	75.2952	42256	42256	MS2	37/148	20130120_Brassica_A3.raw
	High	VTPQPGVPPEEAGAAVAAESSTGTWTTVWTDGLTSLDR	Unambiguous	1	1	Bra028087		HCD	1	0	1	1	428	5.89264	0	0	0.761677	19	3	1285.63	3854.87	-1.31593	62.0094	34768	34768	MS2	31/148	20130120_Brassica_A3.raw
	High	GGLDFTKDDENVNSQPFmR	Unambiguous	2	2	Bra028087 ;Bra041116	M18(Oxidation)	HCD	1	0	1	1	228	5.87171	0	1	0	11	2	1093.49	2185.98	-2.01266	33.6715	18758	18758	MS2	25/36	20130120_Brassica_A1.raw
	High	ELGVPIVmHDYLTGGFTANTSLAHYcR	Unambiguous	1	1	Bra028087	M8(Oxidation); C26(Carbamidomethyl)	HCD	1	0	1	1	396	5.85986	0	0	14.3851	50	3	1013.49	3038.46	1.78286	40.787	22872	22872	MS2	37/104	20130120_Brassica_A3.raw
	High	VTPQPGVPPEEAGAAVAAESSTGTWTTVWTDGLTSLDR	Unambiguous	1	1	Bra028087		HCD	1	0	1	1	425	5.85694	0	0	0	25	3	1285.63	3854.87	-0.840936	61.7385	34615	34615	MS2	35/148	20130120_Brassica_A3.raw
	High	VTPQPGVPPEEAGAAVAAESSTGTWTTVWTDGLTSLDR	Unambiguous	1	1	Bra028087		HCD	1	0	1	1	423	5.84491	0	0	0	34	3	1285.63	3854.87	-1.50593	66.58	37348	37348	MS2	39/148	20130120_Brassica_A3.raw
	High	VTPQPGVPPEEAGAAVAAESSTGTWTTVWTDGLTSLDR	Unambiguous	1	1	Bra028087		HCD	1	0	1	1	435	5.84012	0	0	1.55899	50	3	1285.63	3854.87	-0.365938	73.0373	40984	40984	MS2	36/148	20130120_Brassica_A3.raw
	High	GGLDFTKDDENVNSQPFmR	Unambiguous	2	2	Bra028087 ;Bra041116	M18(Oxidation)	HCD	1	0	1	1	224	5.83945	0	1	0	42	2	1093.49	2185.98	-2.68278	32.6761	18246	18246	MS2	23/36	20130120_Brassica_A3.raw
	High	VTPQPGVPPEEAGAAVAAESSTGTWTTVWTDGLTSLDR	Unambiguous	1	1	Bra028087		HCD	1	0	1	1	423	5.81684	0	0	0	46	3	1285.63	3854.87	-0.745936	81.163	45549	45549	MS2	34/148	20130120_Brassica_A3.raw
	High	VTPQPGVPPEEAGAAVAAESSTGTWTTVWTDGLTSLDR	Unambiguous	1	1	Bra028087		HCD	1	0	1	1	438	5.80799	0	0	0.784445	29	3	1285.63	3854.87	0.0140601	64.1776	35991	35991	MS2	36/148	20130120_Brassica_A3.raw
	High	VTPQPGVPPEEAGAAVAAESSTGTWTTVWTDGLTSLDR	Unambiguous	1	1	Bra028087		HCD	1	0	1	1	440	5.80677	0	0	0.541296	18	3	1285.63	3854.87	0.584057	56.9008	31903	31903	MS2	34/148	20130120_Brassica_A3.raw
	High	VTPQPGVPPEEAGAAVAAESSTGTWTTVWTDGLTSLDR	Unambiguous	1	1	Bra028087		HCD	1	0	1	1	427	5.80461	0	0	0	39	3	1285.63	3854.87	-1.41093	68.4718	38410	38410	MS2	36/148	20130120_Brassica_A3.raw
	High	VTPQPGVPPEEAGAAVAAESSTGTWTTVWTDGLTSLDR	Unambiguous	1	1	Bra028087		HCD	1	0	1	1	427	5.7477	0	0	0	50	3	1285.62	3854.86	-4.07094	53.2845	29801	29801	MS2	36/148	20130120_Brassica_A1.raw
	High	GHYLNATAGTcEEmMKR	Unambiguous	1	1	Bra028087	C11(Carbamidomethyl); M14(Oxidation)	HCD	0.0417	0	1	1	128	5.74649	0	1	23.8289	46	3	662.292	1984.86	-3.13881	25.2525	13919	13919	MS2	28/64	20130120_Brassica_A3.raw
	High	GGLDFTKDDENVNSQPFmR	Unambiguous	2	2	Bra028087 ;Bra041116	M18(Oxidation)	HCD	1	0	1	1	201	5.73812	0	1	0.674023	1	2	1093.49	2185.98	-1.0075	32.9328	18394	18394	MS2	25/36	20130120_Brassica_A3.raw
	High	VTPQPGVPPEEAGAAVAAESSTGTWTTVWTDGLTSLDR	Unambiguous	1	1	Bra028087		HCD	1	0	1	1	423	5.7326	0	0	0	50	3	1285.63	3854.87	-1.69593	74.6217	41875	41875	MS2	35/148	20130120_Brassica_A3.raw
	High	VTPQPGVPPEEAGAAVAAESSTGTWTTVWTDGLTSLDR	Unambiguous	1	1	Bra028087		HCD	1	0	1	1	343	5.72917	0	0	0	50	2	1927.94	3854.86	-2.40494	55.2664	30991	30991	MS2	32/74	20130120_Brassica_A3.raw
	High	GGLDFTKDDENVNSQPFmR	Unambiguous	2	2	Bra028087 ;Bra041116	M18(Oxidation)	HCD	1	0	1	1	211	5.72472	0	1	0	21	2	1093.5	2185.98	1.33788	33.7616	18779	18779	MS2	25/36	20130120_Brassica_A4.raw
	High	VTPQPGVPPEEAGAAVAAESSTGTWTTVWTDGLTSLDR	Unambiguous	1	1	Bra028087		HCD	1	0	1	1	420	5.71942	0	0	0	50	3	1285.63	3854.87	-1.69593	77.9641	43756	43756	MS2	37/148	20130120_Brassica_A3.raw
	High	VTPQPGVPPEEAGAAVAAESSTGTWTTVWTDGLTSLDR	Unambiguous	1	1	Bra028087		HCD	1	0	1	1	439	5.71398	0	0	0	39	3	1285.63	3854.87	0.299059	70.1145	39337	39337	MS2	35/148	20130120_Brassica_A3.raw
	High	VTPQPGVPPEEAGAAVAAESSTGTWTTVWTDGLTSLDR	Unambiguous	1	1	Bra028087		HCD	1	0	1	1	427	5.71039	0	0	0	24	3	1285.63	3854.87	-1.41093	69.5771	39031	39031	MS2	38/148	20130120_Brassica_A3.raw
	High	VTPQPGVPPEEAGAAVAAESSTGTWTTVWTDGLTSLDR	Unambiguous	1	1	Bra028087		HCD	1	0	1	1	424	5.70843	0	0	0	50	3	1285.63	3854.87	-0.840936	76.9103	43164	43164	MS2	39/148	20130120_Brassica_A3.raw
	High	VTPQPGVPPEEAGAAVAAESSTGTWTTVWTDGLTSLDR	Unambiguous	1	1	Bra028087		HCD	1	0	1	1	440	5.70703	0	0	0.478482	22	3	1285.63	3854.87	0.204059	57.1792	32059	32059	MS2	34/148	20130120_Brassica_A3.raw
	High	VTPQPGVPPEEAGAAVAAESSTGTWTTVWTDGLTSLDR	Unambiguous	1	1	Bra028087		HCD	1	0	1	1	421	5.703	0	0	0	25	3	1285.63	3854.87	-0.555937	65.8007	36907	36907	MS2	35/148	20130120_Brassica_A3.raw
	High	GGLDFTKDDENVNSQPFmR	Unambiguous	2	2	Bra028087 ;Bra041116	M18(Oxidation)	HCD	1	0	1	1	235	5.70004	0	1	0	27	2	1093.5	2185.99	2.23135	33.809	18904	18904	MS2	25/36	20130120_Brassica_A3.raw
	High	VTPQPGVPPEEAGAAVAAESSTGTWTTVWTDGLTSLDR	Unambiguous	1	1	Bra028087		HCD	1	0	1	1	439	5.66432	0	0	1.03776	50	3	1285.63	3854.87	0.204059	73.2921	41128	41128	MS2	38/148	20130120_Brassica_A3.raw
	High	VTPQPGVPPEEAGAAVAAESSTGTWTTVWTDGLTSLDR	Unambiguous	1	1	Bra028087		HCD	1	0	1	1	430	5.66238	0	0	0	50	3	1285.63	3854.87	-1.31593	74.352	41723	41723	MS2	35/148	20130120_Brassica_A3.raw
	High	VTPQPGVPPEEAGAAVAAESSTGTWTTVWTDGLTSLDR	Unambiguous	1	1	Bra028087		HCD	1	0	1	1	438	5.64017	0	0	0.917152	49	3	1285.63	3854.87	0.204059	75.8667	42577	42577	MS2	36/148	20130120_Brassica_A3.raw
	High	LNYYTPEYETKDTDILAAFR	Unambiguous	1	1	Bra028087		HCD	1	0	1	1	404	5.63941	0	1	14.5822	50	3	808.397	2423.18	-0.0976327	44.2514	24679	24679	MS2	32/76	20130120_Brassica_A2.raw
	High	ELGVPIVmHDYLTGGFTANTSLAHYcR	Unambiguous	1	1	Bra028087	M8(Oxidation); C26(Carbamidomethyl)	HCD	1	0	1	1	347	5.63826	0	0	0	50	2	1519.74	3038.46	4.74015	40.9281	22951	22951	MS2	28/52	20130120_Brassica_A3.raw
	High	VTPQPGVPPEEAGAAVAAESSTGTWTTVWTDGLTSLDR	Unambiguous	1	1	Bra028087		HCD	1	0	1	1	441	5.6227	0	0	0.305318	50	3	1285.63	3854.88	1.43905	78.2214	43900	43900	MS2	33/148	20130120_Brassica_A3.raw
	High	VTPQPGVPPEEAGAAVAAESSTGTWTTVWTDGLTSLDR	Unambiguous	1	1	Bra028087		HCD	1	0	1	1	422	5.61887	0	0	0	50	3	1285.63	3854.87	-0.745936	64.4476	36143	36143	MS2	38/148	20130120_Brassica_A3.raw
	High	VTPQPGVPPEEAGAAVAAESSTGTWTTVWTDGLTSLDR	Unambiguous	1	1	Bra028087		HCD	1	0	1	1	426	5.61601	0	0	0.354699	27	3	1285.63	3854.87	-0.935936	66.0546	37051	37051	MS2	36/148	20130120_Brassica_A3.raw
	High	LNYYTPEYETKDTDILAAFR	Unambiguous	1	1	Bra028087		HCD	1	0	1	1	416	5.61287	0	1	0	43	3	808.396	2423.17	-1.30666	44.0497	24630	24630	MS2	32/76	20130120_Brassica_A1.raw
	High	VTPQPGVPPEEAGAAVAAESSTGTWTTVWTDGLTSLDR	Unambiguous	1	1	Bra028087		HCD	1	0	1	1	436	5.59412	0	0	0.301932	36	3	1285.63	3854.89	4.38402	70.6436	39636	39636	MS2	37/148	20130120_Brassica_A3.raw
	High	VTPQPGVPPEEAGAAVAAESSTGTWTTVWTDGLTSLDR	Unambiguous	1	1	Bra028087		HCD	1	0	1	1	430	5.58184	0	0	0	36	3	1285.63	3854.87	-0.0809394	53.0176	29652	29652	MS2	39/148	20130120_Brassica_A1.raw
	High	VTPQPGVPPEEAGAAVAAESSTGTWTTVWTDGLTSLDR	Unambiguous	1	1	Bra028087		HCD	1	0	1	1	421	5.58131	0	0	0	11	3	1285.63	3854.87	-1.79093	53.9977	30283	30283	MS2	38/148	20130120_Brassica_A3.raw
	High	VTPQPGVPPEEAGAAVAAESSTGTWTTVWTDGLTSLDR	Unambiguous	1	1	Bra028087		HCD	1	0	1	1	409	5.57813	0	0	0	35	3	1285.64	3854.9	8.46894	70.9186	39790	39790	MS2	37/148	20130120_Brassica_A3.raw
	High	LNYYTPEYETKDTDILAAFR	Unambiguous	1	1	Bra028087		HCD	1	0	1	1	394	5.57152	0	1	3.2589	35	3	808.398	2423.18	1.41365	43.0764	24172	24172	MS2	30/76	20130120_Brassica_A3.raw
	High	VTPQPGVPPEEAGAAVAAESSTGTWTTVWTDGLTSLDR	Unambiguous	1	1	Bra028087		HCD	1	0	1	1	445	5.54682	0	0	0	50	3	1285.63	3854.88	1.05905	73.551	41272	41272	MS2	37/148	20130120_Brassica_A3.raw
	High	VTPQPGVPPEEAGAAVAAESSTGTWTTVWTDGLTSLDR	Unambiguous	1	1	Bra028087		HCD	1	0	1	1	429	5.53871	0	0	75.7756	50	3	1285.62	3854.86	-3.78593	75.0282	42106	42106	MS2	36/148	20130120_Brassica_A3.raw
	High	GGLDFTKDDENVNSQPFmR	Unambiguous	2	2	Bra028087 ;Bra041116	M18(Oxidation)	HCD	1	0	1	1	211	5.53181	0	1	0	11	2	1093.5	2185.98	1.11451	34.0242	18928	18928	MS2	24/36	20130120_Brassica_A4.raw
	High	GHYLNATAGTcEEmmKR	Unambiguous	1	1	Bra028087	C11(Carbamidomethyl); M14(Oxidation); M15(Oxidation)	HCD	1	0	1	1	145	5.52945	0	1	2.02666	2	3	667.624	2000.86	-1.79248	22.6028	12400	12400	MS2	25/64	20130120_Brassica_A3.raw
	High	VTPQPGVPPEEAGAAVAAESSTGTWTTVWTDGLTSLDR	Unambiguous	1	1	Bra028087		HCD	1	0	1	1	420	5.52565	0	0	0	16	3	1285.62	3854.86	-3.40593	56.1111	31462	31462	MS2	35/148	20130120_Brassica_A3.raw
	High	GHYLNATAGTcEEMmKR	Unambiguous	1	1	Bra028087	C11(Carbamidomethyl); M15(Oxidation)	HCD		0.0417	2	2	128	5.50815	0	1	23.8289	46	3	662.292	1984.86	-3.13881	25.2525	13919	13919	MS2	27/64	20130120_Brassica_A3.raw
	High	VTPQPGVPPEEAGAAVAAESSTGTWTTVWTDGLTSLDR	Unambiguous	1	1	Bra028087		HCD	1	0	1	1	422	5.47761	0	0	0	40	3	1285.63	3854.87	-1.60093	72.5138	40687	40687	MS2	33/148	20130120_Brassica_A3.raw
	High	VTPQPGVPPEEAGAAVAAESSTGTWTTVWTDGLTSLDR	Unambiguous	1	1	Bra028087		HCD	1	0	1	1	424	5.46976	0	0	0	17	3	1285.63	3854.87	-0.840936	54.7912	30724	30724	MS2	33/148	20130120_Brassica_A3.raw
	High	VTPQPGVPPEEAGAAVAAESSTGTWTTVWTDGLTSLDR	Unambiguous	1	1	Bra028087		HCD	1	0	1	1	428	5.46409	0	0	0	50	3	1285.63	3854.87	-0.270938	76.1245	42722	42722	MS2	37/148	20130120_Brassica_A3.raw
	High	VTPQPGVPPEEAGAAVAAESSTGTWTTVWTDGLTSLDR	Unambiguous	1	1	Bra028087		HCD	1	0	1	1	422	5.46381	0	0	0	28	3	1285.63	3854.87	-1.69593	72.7716	40834	40834	MS2	37/148	20130120_Brassica_A3.raw
	High	VTPQPGVPPEEAGAAVAAESSTGTWTTVWTDGLTSLDR	Unambiguous	1	1	Bra028087		HCD	1	0	1	1	339	5.46099	0	0	9.14235	50	2	1927.93	3854.85	-5.19162	57.5344	32258	32258	MS2	27/74	20130120_Brassica_A3.raw
	High	GHYLNATAGTcEEmmKR	Unambiguous	1	1	Bra028087	C11(Carbamidomethyl); M14(Oxidation); M15(Oxidation)	HCD	1	0	1	1	146	5.45976	0	1	4.59007	50	3	667.624	2000.86	-1.79248	22.7878	12509	12509	MS2	27/64	20130120_Brassica_A4.raw
	High	ESTLGFVDLLRDDYVEK	Unambiguous	1	1	Bra028087		HCD	1	0	1	1	375	5.45935	0	1	0	50	2	1000.01	1999	1.06284	45.8439	25571	25571	MS2	22/32	20130120_Brassica_A2.raw
	High	VTPQPGVPPEEAGAAVAAESSTGTWTTVWTDGLTSLDR	Unambiguous	1	1	Bra028087		HCD	1	0	1	1	432	5.45692	0	0	0	50	3	1285.63	3854.87	-0.460938	75.6002	42428	42428	MS2	34/148	20130120_Brassica_A3.raw
	High	VTPQPGVPPEEAGAAVAAESSTGTWTTVWTDGLTSLDR	Unambiguous	1	1	Bra028087		HCD	1	0	1	1	422	5.44143	0	0	0	43	3	1285.63	3854.87	-1.50593	52.8579	29524	29524	MS2	35/148	20130120_Brassica_A4.raw
	High	VTPQPGVPPEEAGAAVAAESSTGTWTTVWTDGLTSLDR	Unambiguous	1	1	Bra028087		HCD	1	0	1	1	420	5.4287	0	0	1.28727	50	3	1285.63	3854.87	-0.650937	79.8015	44789	44789	MS2	35/148	20130120_Brassica_A3.raw
	High	SQAETGEIKGHYLNATAGTcEEmmKR	Unambiguous	1	1	Bra028087	C20(Carbamidomethyl); M23(Oxidation); M24(Oxidation)	HCD	1	0	1	1	270	5.41988	0	2	0	32	4	736.837	2944.32	0.373725	26.4338	14563	14563	MS2	40/150	20130120_Brassica_A2.raw
	High	VTPQPGVPPEEAGAAVAAESSTGTWTTVWTDGLTSLDR	Unambiguous	1	1	Bra028087		HCD	1	0	1	1	433	5.40487	0	0	1.53541	50	3	1285.63	3854.87	-0.0809394	80.8899	45396	45396	MS2	36/148	20130120_Brassica_A3.raw
	High	VTPQPGVPPEEAGAAVAAESSTGTWTTVWTDGLTSLDR	Unambiguous	1	1	Bra028087		HCD	1	0	1	1	436	5.38526	0	0	0	34	3	1285.62	3854.86	-3.97593	72.2593	40543	40543	MS2	35/148	20130120_Brassica_A3.raw
	High	VTPQPGVPPEEAGAAVAAESSTGTWTTVWTDGLTSLDR	Unambiguous	1	1	Bra028087		HCD	1	0	1	1	438	5.3841	0	0	1.29021	50	3	1285.63	3854.87	0.584057	79.2508	44478	44478	MS2	33/148	20130120_Brassica_A3.raw
	High	ELGVPIVmHDYLTGGFTANTSLAHYcR	Unambiguous	1	1	Bra028087	M8(Oxidation); C26(Carbamidomethyl)	HCD	1	0	1	1	396	5.3748	0	0	1.92952	15	4	760.368	3038.45	0.593273	41.488	23126	23126	MS2	41/156	20130120_Brassica_A2.raw
	High	VTPQPGVPPEEAGAAVAAESSTGTWTTVWTDGLTSLDR	Unambiguous	1	1	Bra028087		HCD	1	0	1	1	443	5.35785	0	0	0	50	3	1285.63	3854.88	1.24905	53.541	29945	29945	MS2	36/148	20130120_Brassica_A1.raw
	High	GGLDFTKDDENVNSQPFMR	Unambiguous	2	2	Bra028087 ;Bra041116		HCD	1	0	1	1	233	5.35594	0	1	0	50	2	1085.5	2169.99	-0.320544	36.66	20395	20395	MS2	25/36	20130120_Brassica_A2.raw
	High	SQAETGEIKGHYLNATAGTcEEmmKR	Unambiguous	1	1	Bra028087	C20(Carbamidomethyl); M23(Oxidation); M24(Oxidation)	HCD	1	0	1	1	277	5.34574	0	2	22.1464	34	4	736.838	2944.33	1.61751	26.3434	14541	14541	MS2	39/150	20130120_Brassica_A1.raw
	High	GGLDFTKDDENVNSQPFmR	Unambiguous	2	2	Bra028087 ;Bra041116	M18(Oxidation)	HCD	1	0	1	1	238	5.34417	0	1	0	50	2	1093.5	2185.99	3.12482	33.7941	18799	18799	MS2	24/36	20130120_Brassica_A5.raw
	High	VTPQPGVPPEEAGAAVAAESSTGTWTTVWTDGLTSLDR	Unambiguous	1	1	Bra028087		HCD	1	0	1	1	419	5.34089	0	0	0	11	3	1285.63	3854.87	-1.69593	59.0737	33118	33118	MS2	35/148	20130120_Brassica_A3.raw
	High	GGLDFTKDDENVNSQPFmR	Unambiguous	2	2	Bra028087 ;Bra041116	M18(Oxidation)	HCD	1	0	1	1	218	5.32207	0	1	5.17661	50	2	1093.5	2185.99	1.67293	91.6777	51456	51456	MS2	25/36	20130120_Brassica_A3.raw
	High	LEGDRESTLGFVDLLRDDYVEK	Unambiguous	1	1	Bra028087		HCD	1	0	1	1	328	5.31455	0	2	5.89109	26	2	1285.14	2569.28	1.6958	43.2882	24293	24293	MS2	22/42	20130120_Brassica_A3.raw
	High	VTPQPGVPPEEAGAAVAAESSTGTWTTVWTDGLTSLDR	Unambiguous	1	1	Bra028087		HCD	1	0	1	1	422	5.3087	0	0	1.18275	50	3	1285.63	3854.87	-1.60093	77.7091	43612	43612	MS2	36/148	20130120_Brassica_A3.raw
	High	VTPQPGVPPEEAGAAVAAESSTGTWTTVWTDGLTSLDR	Unambiguous	1	1	Bra028087		HCD	1	0	1	1	420	5.29104	0	0	0	2	3	1285.63	3854.87	-1.03094	52.4651	29342	29342	MS2	37/148	20130120_Brassica_A1.raw
	High	GHYLNATAGTcEEmmKR	Unambiguous	1	1	Bra028087	C11(Carbamidomethyl); M14(Oxidation); M15(Oxidation)	HCD	1	0	1	1	143	5.27543	0	1	9.08992	50	3	667.625	2000.86	-1.15189	22.9125	12593	12593	MS2	27/64	20130120_Brassica_A1.raw
	High	VTPQPGVPPEEAGAAVAAESSTGTWTTVWTDGLTSLDR	Unambiguous	1	1	Bra028087		HCD	1	0	1	1	442	5.26959	0	0	0.903465	50	3	1285.63	3854.87	0.489057	79.5231	44631	44631	MS2	35/148	20130120_Brassica_A3.raw
	High	VTPQPGVPPEEAGAAVAAESSTGTWTTVWTDGLTSLDR	Unambiguous	1	1	Bra028087		HCD	1	0	1	1	439	5.22385	0	0	0	23	3	1285.63	3854.87	0.394058	68.7304	38556	38556	MS2	35/148	20130120_Brassica_A3.raw
	High	GGLDFTKDDENVNSQPFmR	Unambiguous	2	2	Bra028087 ;Bra041116	M18(Oxidation)	HCD	1	0	1	1	214	5.21899	0	1	0.430139	1	2	1093.49	2185.98	-0.337391	33.8787	18817	18817	MS2	25/36	20130120_Brassica_A2.raw
	High	GHYLNATAGTcEEmMKR	Unambiguous	1	1	Bra028087	C11(Carbamidomethyl); M14(Oxidation)	HCD	0.1036	0	1	1	166	5.20986	0	1	19.5456	38	3	662.295	1984.87	1.10474	24.8745	13702	13702	MS2	29/64	20130120_Brassica_A3.raw
	High	VTPQPGVPPEEAGAAVAAESSTGTWTTVWTDGLTSLDR	Unambiguous	1	1	Bra028087		HCD	1	0	1	1	368	5.20209	0	0	0	50	2	1927.94	3854.88	1.20504	52.2914	29245	29245	MS2	27/74	20130120_Brassica_A1.raw
	High	VTPQPGVPPEEAGAAVAAESSTGTWTTVWTDGLTSLDR	Unambiguous	1	1	Bra028087		HCD	1	0	1	1	446	5.16412	0	0	0.753207	50	3	1285.63	3854.88	0.964054	80.6158	45243	45243	MS2	34/148	20130120_Brassica_A3.raw
	High	VTPQPGVPPEEAGAAVAAESSTGTWTTVWTDGLTSLDR	Unambiguous	1	1	Bra028087		HCD	1	0	1	1	433	5.12561	0	0	1.44143	50	3	1285.63	3854.87	-0.0809394	77.4522	43468	43468	MS2	34/148	20130120_Brassica_A3.raw
	High	VTPQPGVPPEEAGAAVAAESSTGTWTTVWTDGLTSLDR	Unambiguous	1	1	Bra028087		HCD	1	0	1	1	319	5.10307	0	0	0	50	2	1927.93	3854.86	-2.97494	52.2599	29314	29314	MS2	26/74	20130120_Brassica_A3.raw
	High	VTPQPGVPPEEAGAAVAAESSTGTWTTVWTDGLTSLDR	Unambiguous	1	1	Bra028087		HCD	1	0	1	1	421	5.09532	0	0	0.554644	31	3	1285.63	3854.87	-0.745936	52.1953	29191	29191	MS2	37/148	20130120_Brassica_A1.raw
	High	GGLDFTKDDENVNSQPFmR	Unambiguous	2	2	Bra028087 ;Bra041116	M18(Oxidation)	HCD	1	0	1	1	205	5.00131	0	1	0	2	2	1093.49	2185.98	-0.449075	33.4544	18700	18700	MS2	23/36	20130120_Brassica_A3.raw
	High	ELGVPIVmHDYLTGGFTANTSLAHYcR	Unambiguous	1	1	Bra028087	M8(Oxidation); C26(Carbamidomethyl)	HCD	1	0	1	1	392	4.99023	0	0	0.824507	8	3	1013.49	3038.45	-1.3508	41.0503	23020	23020	MS2	33/104	20130120_Brassica_A3.raw
	High	WSPELAAAcEVWK	Unambiguous	2	2	Bra028087 ;Bra041116	C9(Carbamidomethyl)	HCD	1	0	1	1	263	4.96437	0	0	0	30	1	1546.74	1546.74	0.00428261	42.1717	23659	23659	MS2	19/24	20130120_Brassica_A3.raw
	High	VTPQPGVPPEEAGAAVAAESSTGTWTTVWTDGLTSLDR	Unambiguous	1	1	Bra028087		HCD	1	0	1	1	440	4.95126	0	0	0	50	3	1285.63	3854.87	0.0140601	92.8197	52090	52090	MS2	33/148	20130120_Brassica_A3.raw
	High	LEGDRESTLGFVDLLRDDYVEK	Unambiguous	1	1	Bra028087		HCD	1	0	1	1	471	4.94432	0	2	5.58565	34	3	857.097	2569.28	-0.685002	44.1402	24617	24617	MS2	32/84	20130120_Brassica_A2.raw
	High	GHYLNATAGTcEEmmKR	Unambiguous	1	1	Bra028087	C11(Carbamidomethyl); M14(Oxidation); M15(Oxidation)	HCD	1	0	1	1	145	4.93394	0	1	0	18	3	667.625	2000.86	-1.70097	23.1376	12706	12706	MS2	26/64	20130120_Brassica_A3.raw
	High	ELGVPIVmHDYLTGGFTANTSLAHYcR	Unambiguous	1	1	Bra028087	M8(Oxidation); C26(Carbamidomethyl)	HCD	1	0	1	1	401	4.93205	0	0	0	13	4	760.369	3038.45	0.834324	40.8148	22887	22887	MS2	36/156	20130120_Brassica_A3.raw
	High	VTPQPGVPPEEAGAAVAAESSTGTWTTVWTDGLTSLDR	Unambiguous	1	1	Bra028087		HCD	1	0	1	1	434	4.92645	0	0	1.37224	44	4	964.473	3854.87	-0.480259	52.5617	29483	29483	MS2	44/222	20130120_Brassica_A3.raw
	High	VTPQPGVPPEEAGAAVAAESSTGTWTTVWTDGLTSLDR	Unambiguous	1	1	Bra028087		HCD	1	0	1	1	444	4.88154	0	0	0	50	4	964.474	3854.87	0.279737	52.8185	29626	29626	MS2	41/222	20130120_Brassica_A3.raw
	High	GHYLNATAGTcEEmmK	Unambiguous	1	1	Bra028087	C11(Carbamidomethyl); M14(Oxidation); M15(Oxidation)	HCD	1	0	1	1	46	4.86411	0	0	0	44	2	922.884	1844.76	-0.191593	23.6112	12979	12979	MS2	21/30	20130120_Brassica_A3.raw
	High	VTPQPGVPPEEAGAAVAAESSTGTWTTVWTDGLTSLDR	Unambiguous	1	1	Bra028087		HCD	1	0	1	1	441	4.84173	0	0	1.19092	30	3	1285.63	3854.87	0.489057	65.53	36755	36755	MS2	36/148	20130120_Brassica_A3.raw
	High	VTPQPGVPPEEAGAAVAAESSTGTWTTVWTDGLTSLDR	Unambiguous	1	1	Bra028087		HCD	1	0	1	1	444	4.81471	0	0	0	50	4	964.474	3854.87	0.279737	52.82	29627	29627	MS2	41/222	20130120_Brassica_A3.raw
	High	LNYYTPEYETKDTDILAAFR	Unambiguous	1	1	Bra028087		HCD	1	0	1	1	419	4.80889	0	1	0	50	3	808.396	2423.17	-0.777711	43.7429	24395	24395	MS2	30/76	20130120_Brassica_A2.raw
	High	VTPQPGVPPEEAGAAVAAESSTGTWTTVWTDGLTSLDR	Unambiguous	1	1	Bra028087		HCD	1	0	1	1	437	4.78207	0	0	4.41968	22	4	964.477	3854.88	3.19305	52.2979	29336	29336	MS2	46/222	20130120_Brassica_A3.raw
	High	LEGDRESTLGFVDLLR	Unambiguous	1	1	Bra028087		HCD	1	0	1	1	344	4.77394	0	1	3.06834	43	3	607.326	1819.96	4.5488	91.5089	51250	51250	MS2	25/60	20130120_Brassica_A1.raw
	High	GGLDFTKDDENVNSQPFmR	Unambiguous	2	2	Bra028087 ;Bra041116	M18(Oxidation)	HCD	1	0	1	1	221	4.77299	0	1	0	50	2	1093.5	2185.99	1.78461	33.5274	18649	18649	MS2	26/36	20130120_Brassica_A5.raw
	High	LSGGDHVHAGTVVGKLEGDR	Unambiguous	1	1	Bra028087		HCD	1	0	1	1	373	4.76809	0	1	19.6471	50	3	668.681	2004.03	1.35042	27.1644	15012	15012	MS2	35/76	20130120_Brassica_A1.raw
	High	GGLDFTKDDENVNSQPFmR	Unambiguous	2	2	Bra028087 ;Bra041116	M18(Oxidation)	HCD	1	0	1	1	223	4.74163	0	1	0	50	2	1093.5	2185.99	1.8963	33.1459	18455	18455	MS2	22/36	20130120_Brassica_A1.raw
	High	ELGVPIVmHDYLTGGFTANTSLAHYcR	Unambiguous	1	1	Bra028087	M8(Oxidation); C26(Carbamidomethyl)	HCD	1	0	1	1	418	4.73347	0	0	12.9702	50	4	760.371	3038.46	4.61077	91.5654	51226	51226	MS2	39/156	20130120_Brassica_A2.raw
	High	ELGVPIVmHDYLTGGFTANTSLAHYcR	Unambiguous	1	1	Bra028087	M8(Oxidation); C26(Carbamidomethyl)	HCD	1	0	1	1	402	4.72529	0	0	5.50489	33	3	1013.49	3038.44	-2.19448	41.4709	23177	23177	MS2	33/104	20130120_Brassica_A1.raw
	High	VTPQPGVPPEEAGAAVAAESSTGTWTTVWTDGLTSLDR	Unambiguous	1	1	Bra028087		HCD	1	0	1	1	442	4.70129	0	0	0	50	3	1285.63	3854.87	0.299059	80.3445	45092	45092	MS2	35/148	20130120_Brassica_A3.raw
	High	VTPQPGVPPEEAGAAVAAESSTGTWTTVWTDGLTSLDR	Unambiguous	1	1	Bra028087		HCD	1	0	1	1	422	4.69152	0	0	0	8	3	1285.63	3854.87	-0.650937	52.4958	29325	29325	MS2	35/148	20130120_Brassica_A6.raw
	High	LNYYTPEYETKDTDILAAFR	Unambiguous	1	1	Bra028087		HCD	1	0	1	1	420	4.68882	0	1	7.08785	30	3	808.396	2423.17	-1.38223	43.4679	24395	24395	MS2	25/76	20130120_Brassica_A3.raw
	High	LEGDRESTLGFVDLLR	Unambiguous	1	1	Bra028087		HCD	1	0	1	1	352	4.67237	0	1	3.39419	19	3	607.325	1819.96	2.3354	91.8655	51560	51560	MS2	24/60	20130120_Brassica_A3.raw
	High	GGLDFTKDDENVNSQPFmR	Unambiguous	2	2	Bra028087 ;Bra041116	M18(Oxidation)	HCD	1	0	1	1	214	4.6348	0	1	25.4109	50	2	1093.5	2185.98	1.33788	33.9365	18911	18911	MS2	24/36	20130120_Brassica_A1.raw
	High	LEGDRESTLGFVDLLR	Unambiguous	1	1	Bra028087		HCD	1	0	1	1	324	4.62561	0	1	2.09303	24	2	910.482	1819.96	1.03486	42.7252	23885	23885	MS2	23/30	20130120_Brassica_A1.raw
	High	ESTLGFVDLLRDDYVEKDR	Unambiguous	1	1	Bra028087		HCD	1	0	1	1	425	4.61592	0	2	14.8142	41	3	757.383	2270.14	2.42756	91.6297	51429	51429	MS2	26/72	20130120_Brassica_A3.raw
	High	ELGVPIVmHDYLTGGFTANTSLAHYcR	Unambiguous	1	1	Bra028087	M8(Oxidation); C26(Carbamidomethyl)	HCD	1	0	1	1	407	4.61294	0	0	2.30918	34	4	760.37	3038.46	2.03958	41.2267	23017	23017	MS2	36/156	20130120_Brassica_A5.raw
	High	GGLDFTKDDENVNSQPFMR	Unambiguous	2	2	Bra028087 ;Bra041116		HCD	1	0	1	1	272	4.59826	0	1	18.2699	50	3	724	2169.99	-0.0735978	35.8708	20075	20075	MS2	27/72	20130120_Brassica_A3.raw
	High	GGLDFTKDDENVNSQPFmR	Unambiguous	2	2	Bra028087 ;Bra041116	M18(Oxidation)	HCD	1	0	1	1	210	4.59663	0	1	0	1	2	1093.49	2185.98	-1.0075	33.1927	18547	18547	MS2	24/36	20130120_Brassica_A3.raw
	High	VTPQPGVPPEEAGAAVAAESSTGTWTTVWTDGLTSLDR	Unambiguous	1	1	Bra028087		HCD	1	0	1	1	440	4.5951	0	0	0	50	3	1285.63	3854.87	0.204059	80.0713	44938	44938	MS2	33/148	20130120_Brassica_A3.raw
	High	ESTLGFVDLLRDDYVEKDR	Unambiguous	1	1	Bra028087		HCD	1	0	1	1	426	4.59266	0	2	22.9359	50	4	568.289	2270.14	2.36787	91.8816	51569	51569	MS2	35/108	20130120_Brassica_A3.raw
	High	LEGDRESTLGFVDLLR	Unambiguous	1	1	Bra028087		HCD	1	0	1	1	350	4.57087	0	1	3.17804	50	3	607.323	1819.95	-0.582282	92.6425	51992	51992	MS2	22/60	20130120_Brassica_A3.raw
	High	ESTLGFVDLLRDDYVEK	Unambiguous	1	1	Bra028087		HCD	1	0	1	1	355	4.56232	0	1	3.72537	12	2	1000.01	1999	0.757511	45.3496	25451	25451	MS2	20/32	20130120_Brassica_A3.raw
	High	LEGDRESTLGFVDLLR	Unambiguous	1	1	Bra028087		HCD	1	0	1	1	365	4.55426	0	1	1.83807	32	3	607.323	1819.96	0.423817	92.1236	51704	51704	MS2	22/60	20130120_Brassica_A3.raw
	High	LEGDRESTLGFVDLLR	Unambiguous	1	1	Bra028087		HCD	1	0	1	1	350	4.53387	0	1	2.71599	50	3	607.323	1819.95	-0.783502	92.3824	51848	51848	MS2	22/60	20130120_Brassica_A3.raw
	High	LEGDRESTLGFVDLLR	Unambiguous	1	1	Bra028087		HCD	1	0	1	1	348	4.52848	0	1	2.26801	50	3	607.325	1819.96	2.53662	91.5181	51200	51200	MS2	22/60	20130120_Brassica_A2.raw
	High	VTPQPGVPPEEAGAAVAAESSTGTWTTVWTDGLTSLDR	Unambiguous	1	1	Bra028087		HCD	1	0	1	1	425	4.51497	0	0	0	50	3	1285.63	3854.87	-0.745936	54.077	30245	30245	MS2	32/148	20130120_Brassica_A1.raw
	High	VTPQPGVPPEEAGAAVAAESSTGTWTTVWTDGLTSLDR	Unambiguous	1	1	Bra028087		HCD	1	0	1	1	440	4.50528	0	0	0.32133	16	3	1285.63	3854.87	0.299059	58.8044	32968	32968	MS2	33/148	20130120_Brassica_A3.raw
	High	VTPQPGVPPEEAGAAVAAESSTGTWTTVWTDGLTSLDR	Unambiguous	1	1	Bra028087		HCD	1	0	1	1	327	4.49475	0	0	0	50	2	1927.94	3854.88	1.77504	56.4735	31666	31666	MS2	25/74	20130120_Brassica_A3.raw
	High	LEGDRESTLGFVDLLR	Unambiguous	1	1	Bra028087		HCD	1	0	1	1	327	4.49118	0	1	0	45	2	910.481	1819.96	0.364133	42.8455	23890	23890	MS2	24/30	20130120_Brassica_A2.raw
	High	YGRPLLGcTIKPK	Unambiguous	2	2	Bra028087 ;Bra041116	C8(Carbamidomethyl)	HCD	1	0	1	1	179	4.47119	0	0	27.3534	9	3	501.623	1502.85	1.18819	26.9786	14894	14894	MS2	29/48	20130120_Brassica_A5.raw
	High	EITFNFPTIDKLDGQD	Unambiguous	1	1	Bra028087		HCD	1	0	1	1	308	4.46523	0	1	0	50	2	926.952	1852.9	-0.137912	45.3292	25329	25329	MS2	17/30	20130120_Brassica_A5.raw
	High	EITFNFPTIDKLDGQD	Unambiguous	1	1	Bra028087		HCD	1	0	1	1	295	4.44698	0	1	8.26272	44	1	1852.9	1852.9	1.48342	46.0257	25831	25831	MS2	19/30	20130120_Brassica_A3.raw
	High	GGLDFTKDDENVNSQPFmR	Unambiguous	2	2	Bra028087 ;Bra041116	M18(Oxidation)	HCD	1	0	1	1	259	4.44252	0	1	9.67166	50	3	729.333	2185.98	0.884989	33.5246	18647	18647	MS2	23/72	20130120_Brassica_A5.raw
	High	IPPAYTKTFQGPPHGIQVER	Unambiguous	1	1	Bra028087		HCD	1	0	1	1	279	4.43636	0	1	2.56097	26	3	746.067	2236.19	-0.895891	31.5058	17570	17570	MS2	31/76	20130120_Brassica_A3.raw
	High	GGLDFTKDDENVNSQPFmR	Unambiguous	2	2	Bra028087 ;Bra041116	M18(Oxidation)	HCD	1	0	1	1	261	4.43535	0	1	2.80449	25	3	729.333	2185.99	1.47133	91.9138	51587	51587	MS2	25/72	20130120_Brassica_A3.raw
	High	YGRPLLGcTIKPK	Unambiguous	2	2	Bra028087 ;Bra041116	C8(Carbamidomethyl)	HCD	0.3886	0	1	1	231	4.40289	0	0	17.2707	9	3	501.622	1502.85	-0.517549	26.8728	14813	14813	MS2	28/48	20130120_Brassica_A2.raw
	High	EYKLNYYTPEYETK	Unambiguous	1	1	Bra028087		HCD	1	0	1	1	277	4.40092	0	1	13.203	25	2	920.933	1840.86	-2.54814	32.3338	18046	18046	MS2	18/26	20130120_Brassica_A3.raw
	High	YGRPLLGcTIKPK	Unambiguous	2	2	Bra028087 ;Bra041116	C8(Carbamidomethyl)	HCD	1	0	1	1	194	4.39702	0	0	1.28938	1	3	501.622	1502.85	0.030726	26.8276	14818	14818	MS2	28/48	20130120_Brassica_A1.raw
	High	ESTLGFVDLLRDDYVEKDR	Unambiguous	1	1	Bra028087		HCD	1	0	1	1	437	4.3914	0	2	3.73669	50	4	568.289	2270.13	1.93769	91.6095	51417	51417	MS2	34/108	20130120_Brassica_A3.raw
	High	ELGVPIVmHDYLTGGFTANTSLAHYcR	Unambiguous	1	1	Bra028087	M8(Oxidation); C26(Carbamidomethyl)	HCD	1	0	1	1	405	4.3913	0	0	0	50	3	1013.49	3038.46	3.28943	41.2035	23028	23028	MS2	29/104	20130120_Brassica_A1.raw
	High	ESTLGFVDLLRDDYVEKDR	Unambiguous	1	1	Bra028087		HCD	1	0	1	1	371	4.38996	0	2	0	29	2	1135.57	2270.13	-0.0400368	43.031	24147	24147	MS2	19/36	20130120_Brassica_A3.raw
	High	GHYLNATAGTcEEmmKR	Unambiguous	1	1	Bra028087	C11(Carbamidomethyl); M14(Oxidation); M15(Oxidation)	HCD	1	0	1	1	146	4.37371	0	1	3.27781	6	3	667.625	2000.86	-1.42643	22.8701	12554	12554	MS2	27/64	20130120_Brassica_A3.raw
	High	VTPQPGVPPEEAGAAVAAESSTGTWTTVWTDGLTSLDR	Unambiguous	1	1	Bra028087		HCD	1	0	1	1	423	4.36609	0	0	0	50	3	1285.63	3854.87	-1.12594	54.3472	30396	30396	MS2	29/148	20130120_Brassica_A1.raw
	High	LEGDRESTLGFVDLLR	Unambiguous	1	1	Bra028087		HCD	1	0	1	1	348	4.36383	0	1	15.1486	19	3	607.322	1819.95	-1.38716	43.2608	24185	24185	MS2	24/60	20130120_Brassica_A1.raw
	High	LEGDRESTLGFVDLLR	Unambiguous	1	1	Bra028087		HCD	1	0	1	1	312	4.35013	0	1	23.2295	50	2	910.485	1819.96	4.32144	91.4626	51334	51334	MS2	22/30	20130120_Brassica_A3.raw
	High	GHYLNATAGTcEEmmKR	Unambiguous	1	1	Bra028087	C11(Carbamidomethyl); M14(Oxidation); M15(Oxidation)	HCD	1	0	1	1	146	4.34739	0	1	3.31787	16	3	667.625	2000.86	-1.33491	23.1191	12680	12680	MS2	26/64	20130120_Brassica_A2.raw
	High	GGLDFTKDDENVNSQPFmR	Unambiguous	2	2	Bra028087 ;Bra041116	M18(Oxidation)	HCD	1	0	1	1	261	4.32907	0	1	4.46278	47	3	729.332	2185.98	0.298645	92.1708	51730	51730	MS2	25/72	20130120_Brassica_A3.raw
	High	LEGDRESTLGFVDLLR	Unambiguous	1	1	Bra028087		HCD	1	0	1	1	334	4.3128	0	1	6.66391	16	2	910.482	1819.96	0.498279	41.9618	23540	23540	MS2	23/30	20130120_Brassica_A3.raw
	High	ELGVPIVmHDYLTGGFTANTSLAHYcR	Unambiguous	1	1	Bra028087	M8(Oxidation); C26(Carbamidomethyl)	HCD	1	0	1	1	396	4.30959	0	0	8.14082	16	4	760.368	3038.45	-0.0495294	41.254	23057	23057	MS2	41/156	20130120_Brassica_A1.raw
	High	ELGVPIVmHDYLTGGFTANTSLAHYcR	Unambiguous	1	1	Bra028087	M8(Oxidation); C26(Carbamidomethyl)	HCD	1	0	1	1	396	4.30534	0	0	18.3828	19	4	760.368	3038.45	-0.0495294	41.6118	23227	23227	MS2	37/156	20130120_Brassica_A4.raw
	High	VTPQPGVPPEEAGAAVAAESSTGTWTTVWTDGLTSLDR	Unambiguous	1	1	Bra028087		HCD	1	0	1	1	428	4.30059	0	0	0.979229	50	4	964.471	3854.86	-2.06359	52.4355	29326	29326	MS2	49/222	20130120_Brassica_A1.raw
	High	EITFNFPTIDKLDGQD	Unambiguous	1	1	Bra028087		HCD	1	0	1	1	300	4.2962	0	1	0	50	2	926.952	1852.9	0.455015	94.4136	52972	52972	MS2	15/30	20130120_Brassica_A3.raw
	High	EITFNFPTIDKLDGQD	Unambiguous	1	1	Bra028087		HCD	1	0	1	1	305	4.29264	0	1	0.216742	6	2	926.952	1852.9	0.586776	46.5893	26020	26020	MS2	15/30	20130120_Brassica_A4.raw
	High	ESTLGFVDLLRDDYVEKDR	Unambiguous	1	1	Bra028087		HCD	1	0	1	1	428	4.29121	0	2	1.92063	20	3	757.381	2270.13	-0.960092	43.6629	24350	24350	MS2	24/72	20130120_Brassica_A2.raw
	High	ESTLGFVDLLRDDYVEKDR	Unambiguous	1	1	Bra028087		HCD	1	0	1	1	431	4.28046	0	2	9.93249	50	3	757.381	2270.13	-1.12141	91.8964	51577	51577	MS2	25/72	20130120_Brassica_A3.raw
	High	LEGDRESTLGFVDLLR	Unambiguous	1	1	Bra028087		HCD	1	0	1	1	364	4.27878	0	1	2.55635	15	3	607.324	1819.96	0.625037	42.7183	23880	23880	MS2	25/60	20130120_Brassica_A1.raw
	High	VTPQPGVPPEEAGAAVAAESSTGTWTTVWTDGLTSLDR	Unambiguous	1	1	Bra028087		HCD	1	0	1	1	440	4.25854	0	0	0	50	3	1285.63	3854.88	2.19904	91.4965	51197	51197	MS2	30/148	20130120_Brassica_A4.raw
	High	LEGDRESTLGFVDLLR	Unambiguous	1	1	Bra028087		HCD	1	0	1	1	365	4.24828	0	1	5.04527	19	3	607.323	1819.96	0.323208	42.9543	23967	23967	MS2	21/60	20130120_Brassica_A6.raw
	High	LEGDRESTLGFVDLLR	Unambiguous	1	1	Bra028087		HCD	1	0	1	1	350	4.24771	0	1	1.79339	12	3	607.323	1819.95	-0.0792319	42.8386	23885	23885	MS2	23/60	20130120_Brassica_A2.raw
	High	ESTLGFVDLLRDDYVEKDR	Unambiguous	1	1	Bra028087		HCD	1	0	1	1	434	4.24632	0	2	1.34711	5	3	757.381	2270.13	-0.234163	43.5076	24326	24326	MS2	25/72	20130120_Brassica_A1.raw
	High	ELGVPIVmHDYLTGGFTANTSLAHYcR	Unambiguous	1	1	Bra028087	M8(Oxidation); C26(Carbamidomethyl)	HCD	1	0	1	1	403	4.24114	0	0	12.318	50	4	760.366	3038.44	-2.13864	92.0765	51678	51678	MS2	38/156	20130120_Brassica_A3.raw
	High	EITFNFPTIDKLDGQD	Unambiguous	1	1	Bra028087		HCD	1	0	1	1	302	4.23605	0	1	10.4316	50	2	926.954	1852.9	1.97027	91.5456	51381	51381	MS2	16/30	20130120_Brassica_A3.raw
	High	LSGGDHVHAGTVVGK	Unambiguous	1	1	Bra028087		HCD	1	0	1	1	379	4.23371	0	0	28.0397	50	4	359.192	1433.75	-1.3391	21.3188	11698	11698	MS2	28/84	20130120_Brassica_A1.raw
	High	GGLDFTKDDENVNSQPFMR	Unambiguous	2	2	Bra028087 ;Bra041116		HCD	1	0	1	1	241	4.22591	0	1	0	50	2	1085.5	2169.99	-0.0955282	36.2899	20247	20247	MS2	20/36	20130120_Brassica_A1.raw
	High	LSGGDHVHAGTVVGK	Unambiguous	1	1	Bra028087		HCD	1	0	1	1	379	4.21843	0	0	32.2596	50	4	359.192	1433.75	-1.16882	21.7771	11925	11925	MS2	32/84	20130120_Brassica_A2.raw
	High	VTPQPGVPPEEAGAAVAAESSTGTWTTVWTDGLTSLDR	Unambiguous	1	1	Bra028087		HCD	1	0	1	1	437	4.21522	0	0	0	21	3	1285.62	3854.86	-3.88093	63.3463	35522	35522	MS2	31/148	20130120_Brassica_A3.raw
	High	LEGDRESTLGFVDLLR	Unambiguous	1	1	Bra028087		HCD	1	0	1	1	325	4.20723	0	1	0	25	2	910.482	1819.96	0.632425	43.1074	24037	24037	MS2	24/30	20130120_Brassica_A2.raw
	High	GGLDFTKDDENVNSQPFmR	Unambiguous	2	2	Bra028087 ;Bra041116	M18(Oxidation)	HCD	1	0	1	1	261	4.19386	0	1	21.4038	50	3	729.333	2185.99	1.55509	33.7181	18755	18755	MS2	24/72	20130120_Brassica_A4.raw
	High	VTPQPGVPPEEAGAAVAAESSTGTWTTVWTDGLTSLDR	Unambiguous	1	1	Bra028087		HCD	1	0	1	1	305	4.16982	0	0	5.65065	50	2	1927.93	3854.84	-7.28163	62.3765	34974	34974	MS2	23/74	20130120_Brassica_A3.raw
	High	GGLDFTKDDENVNSQPFMR	Unambiguous	2	2	Bra028087 ;Bra041116		HCD	1	0	1	1	278	4.16109	0	1	7.63206	50	3	724.001	2169.99	0.263926	36.2394	20218	20218	MS2	30/72	20130120_Brassica_A1.raw
	High	GGLDFTKDDENVNSQPFMR	Unambiguous	2	2	Bra028087 ;Bra041116		HCD	1	0	1	1	269	4.15449	0	1	12.1233	50	3	724.002	2169.99	1.61402	36.616	20371	20371	MS2	28/72	20130120_Brassica_A2.raw
	High	ESTLGFVDLLRDDYVEKDR	Unambiguous	1	1	Bra028087		HCD	1	0	1	1	443	4.15365	0	2	0.861437	7	4	568.288	2270.13	0.00188921	43.7242	24447	24447	MS2	31/108	20130120_Brassica_A1.raw
	High	LSGGDHVHAGTVVGK	Unambiguous	1	1	Bra028087		HCD	1	0	1	1	356	4.14608	0	0	0	50	2	717.377	1433.75	-1.49062	21.5386	11791	11791	MS2	22/28	20130120_Brassica_A2.raw
	High	VTPQPGVPPEEAGAAVAAESSTGTWTTVWTDGLTSLDR	Unambiguous	1	1	Bra028087		HCD	1	0	1	1	424	4.1327	0	0	0	50	3	1285.63	3854.87	-0.745936	55.1803	30864	30864	MS2	30/148	20130120_Brassica_A1.raw
	High	GGLDFTKDDENVNSQPFmR	Unambiguous	2	2	Bra028087 ;Bra041116	M18(Oxidation)	HCD	1	0	1	1	251	4.12651	0	1	10.2402	50	2	1093.5	2185.99	5.69355	34.0556	18932	18932	MS2	23/36	20130120_Brassica_A6.raw
	High	ESTLGFVDLLRDDYVEKDR	Unambiguous	1	1	Bra028087		HCD	1	0	1	1	432	4.12527	0	2	2.83283	50	3	757.381	2270.13	-0.234163	43.6834	24378	24378	MS2	27/72	20130120_Brassica_A6.raw
	High	VTPQPGVPPEEAGAAVAAESSTGTWTTVWTDGLTSLDR	Unambiguous	1	1	Bra028087		HCD	1	0	1	1	426	4.11951	0	0	0	50	3	1285.63	3854.86	-2.64593	53.3856	29819	29819	MS2	32/148	20130120_Brassica_A4.raw
	High	GHYLNATAGTcEEmmK	Unambiguous	1	1	Bra028087	C11(Carbamidomethyl); M14(Oxidation); M15(Oxidation)	HCD	1	0	1	1	54	4.11907	0	0	0	9	3	615.592	1844.76	-0.529739	23.5984	12972	12972	MS2	19/60	20130120_Brassica_A3.raw
	High	LEGDRESTLGFVDLLR	Unambiguous	1	1	Bra028087		HCD	1	0	1	1	361	4.0962	0	1	0.951362	10	3	607.324	1819.96	1.93296	91.6005	51413	51413	MS2	24/60	20130120_Brassica_A3.raw
	High	GGLDFTKDDENVNSQPFmR	Unambiguous	2	2	Bra028087 ;Bra041116	M18(Oxidation)	HCD	1	0	1	1	249	4.0738	0	1	8.66515	27	3	729.332	2185.98	-0.706517	33.6671	18698	18698	MS2	25/72	20130120_Brassica_A2.raw
	High	GHYLNATAGTcEEmmK	Unambiguous	1	1	Bra028087	C11(Carbamidomethyl); M14(Oxidation); M15(Oxidation)	HCD	1	0	1	1	54	4.07308	0	0	2.36492	50	3	615.591	1844.76	-0.728253	23.774	13066	13066	MS2	22/60	20130120_Brassica_A4.raw
	High	EITFNFPTIDKLDGQD	Unambiguous	1	1	Bra028087		HCD	1	0	1	1	285	4.05091	0	1	0	2	2	926.951	1852.9	-0.467317	46.58	25981	25981	MS2	15/30	20130120_Brassica_A2.raw
	High	EITFNFPTIDKLDGQD	Unambiguous	1	1	Bra028087		HCD	1	0	1	1	302	4.03505	0	1	1.39651	21	2	926.953	1852.9	1.44323	91.8157	51532	51532	MS2	15/30	20130120_Brassica_A3.raw
	High	YGRPLLGcTIKPK	Unambiguous	2	2	Bra028087 ;Bra041116	C8(Carbamidomethyl)	HCD	1	0	1	1	192	4.03489	0	0	2.24197	1	3	501.622	1502.85	-0.152032	27.1464	14970	14970	MS2	26/48	20130120_Brassica_A2.raw
	High	EITFNFPTIDKLDGQD	Unambiguous	1	1	Bra028087		HCD	1	0	1	1	290	4.02264	0	1	0	38	2	926.951	1852.9	-0.401436	45.4858	25436	25436	MS2	15/30	20130120_Brassica_A1.raw
	High	VTPQPGVPPEEAGAAVAAESSTGTWTTVWTDGLTSLDR	Unambiguous	1	1	Bra028087		HCD	1	0	1	1	420	4.02118	0	0	0	50	3	1285.63	3854.87	-0.270938	52.7877	29490	29490	MS2	27/148	20130120_Brassica_A6.raw
	High	GGLDFTKDDENVNSQPFmR	Unambiguous	2	2	Bra028087 ;Bra041116	M18(Oxidation)	HCD	1	0	1	1	253	4.01451	0	1	0.896657	50	3	729.332	2185.98	-0.120172	92.4298	51874	51874	MS2	25/72	20130120_Brassica_A3.raw
	High	GHYLNATAGTcEEmmK	Unambiguous	1	1	Bra028087	C11(Carbamidomethyl); M14(Oxidation); M15(Oxidation)	HCD	1	0	1	1	64	4.01377	0	0	10.055	50	3	615.591	1844.76	-1.91934	23.7623	13046	13046	MS2	20/60	20130120_Brassica_A2.raw
	High	GGLDFTKDDENVNSQPFmR	Unambiguous	2	2	Bra028087 ;Bra041116	M18(Oxidation)	HCD	1	0	1	1	252	4.01264	0	1	7.38594	19	3	729.332	2185.98	-0.0364088	34.2328	19146	19146	MS2	24/72	20130120_Brassica_A3.raw
	High	GGLDFTKDDENVNSQPFmR	Unambiguous	2	2	Bra028087 ;Bra041116	M18(Oxidation)	HCD	1	0	1	1	295	4.00903	0	1	4.35342	22	3	729.335	2185.99	3.64917	91.6467	51439	51439	MS2	23/72	20130120_Brassica_A3.raw
	High	DKLNKYGRPLLGcTIKPK	Unambiguous	2	2	Bra028087 ;Bra041116	C13(Carbamidomethyl)	HCD	1	0	1	1	103	4.005	0	2	88.6361	14	4	526.054	2101.19	-0.661057	26.8473	14848	14848	MS2	34/102	20130120_Brassica_A3.raw
	High	EYKLNYYTPEYETK	Unambiguous	1	1	Bra028087		HCD	1	0	1	1	285	4.00117	0	1	16.7515	37	2	920.934	1840.86	-2.08396	32.8853	18304	18304	MS2	19/26	20130120_Brassica_A1.raw
	High	EITFNFPTIDKLDGQD	Unambiguous	1	1	Bra028087		HCD	1	0	1	1	340	3.96166	0	1		50	2	926.959	1852.91	7.56007	48.1515	27018	27018	MS2	15/30	20130120_Brassica_A3.raw
	High	GHYLNATAGTCEEMmKR	Unambiguous	1	1	Bra028087	M15(Oxidation)	HCD	0.0808	0	1	1	214	3.96003	0	1	25.3322	50	3	643.293	1927.86	9.13668	22.3997	12286	12286	MS2	26/64	20130120_Brassica_A3.raw
	High	VTPQPGVPPEEAGAAVAAESSTGTWTTVWTDGLTSLDR	Unambiguous	1	1	Bra028087		HCD	1	0	1	1	420	3.95896	0	0	0	50	3	1285.63	3854.87	-0.935936	52.336	29206	29206	MS2	28/148	20130120_Brassica_A2.raw
	High	GHYLNATAGTcEEmmK	Unambiguous	1	1	Bra028087	C11(Carbamidomethyl); M14(Oxidation); M15(Oxidation)	HCD	1	0	1	1	60	3.94083	0	0	17.4936	50	3	615.592	1844.76	0.0658033	24.022	13192	13192	MS2	21/60	20130120_Brassica_A2.raw
	High	LEGDRESTLGFVDLLR	Unambiguous	1	1	Bra028087		HCD	1	0	1	1	350	3.93661	0	1	30.0061	50	3	607.323	1819.95	-0.179842	43.7202	24536	24536	MS2	21/60	20130120_Brassica_A3.raw
	High	GHYLNATAGTcEEmmKR	Unambiguous	1	1	Bra028087	C11(Carbamidomethyl); M14(Oxidation); M15(Oxidation)	HCD	1	0	1	1	140	3.93153	0	1	82.9931	50	3	667.624	2000.86	-2.98216	23.614	12981	12981	MS2	23/64	20130120_Brassica_A3.raw
	High	ELGVPIVmHDYLTGGFTANTSLAHYcR	Unambiguous	1	1	Bra028087	M8(Oxidation); C26(Carbamidomethyl)	HCD	1	0	1	1	386	3.93081	0	0	0	50	3	1013.49	3038.45	0.0352464	41.7332	23410	23410	MS2	25/104	20130120_Brassica_A3.raw
	High	GGLDFTKDDENVNSQPFmR	Unambiguous	2	2	Bra028087 ;Bra041116	M18(Oxidation)	HCD	1	0	1	1	259	3.92758	0	1	20.9345	50	3	729.333	2185.98	1.05252	34.1632	18868	18868	MS2	25/72	20130120_Brassica_A7.raw
	High	GGLDFTKDDENVNSQPFmR	Unambiguous	2	2	Bra028087 ;Bra041116	M18(Oxidation)	HCD	1	0	1	1	247	3.92404	0	1	2.1316	50	3	729.332	2185.98	-0.455226	92.6914	52019	52019	MS2	27/72	20130120_Brassica_A3.raw
	High	EITFNFPTIDKLDGQD	Unambiguous	1	1	Bra028087		HCD	1	0	1	1	294	3.92051	0	1	1.12937	44	2	926.952	1852.9	-0.203793	92.5923	51964	51964	MS2	16/30	20130120_Brassica_A3.raw
	High	VTPQPGVPPEEAGAAVAAESSTGTWTTVWTDGLTSLDR	Unambiguous	1	1	Bra028087		HCD	1	0	1	1	428	3.91369	0	0	0	21	3	1285.63	3854.87	-0.175939	53.1281	29674	29674	MS2	26/148	20130120_Brassica_A4.raw
	High	ELGVPIVmHDYLTGGFTANTSLAHYcR	Unambiguous	1	1	Bra028087	M8(Oxidation); C26(Carbamidomethyl)	HCD	1	0	1	1	427	3.91196	0	0	0	50	3	1013.49	3038.47	6.54358	91.5767	51288	51288	MS2	27/104	20130120_Brassica_A1.raw
	High	LEGDRESTLGFVDLLR	Unambiguous	1	1	Bra028087		HCD	1	0	1	1	293	3.90961	0	1	1.72404	9	2	910.48	1819.95	-1.11148	42.7102	23853	23853	MS2	23/30	20130120_Brassica_A5.raw
	High	VTPQPGVPPEEAGAAVAAESSTGTWTTVWTDGLTSLDR	Unambiguous	1	1	Bra028087		HCD	1	0	1	1	428	3.90935	0	0	0.735034	17	4	964.471	3854.86	-2.06359	52.8602	29651	29651	MS2	46/222	20130120_Brassica_A3.raw
	High	ESTLGFVDLLRDDYVEK	Unambiguous	1	1	Bra028087		HCD	1	0	1	1	381	3.89493	0	1	12.1158	50	3	667.006	1999	0.903448	91.5912	51406	51406	MS2	25/64	20130120_Brassica_A3.raw
	High	LEGDRESTLGFVDLLR	Unambiguous	1	1	Bra028087		HCD	1	0	1	1	347	3.89271	0	1	0	50	3	607.323	1819.95	-1.08533	92.9023	52136	52136	MS2	23/60	20130120_Brassica_A3.raw
	High	LEGDRESTLGFVDLLRDDYVEK	Unambiguous	1	1	Bra028087		HCD	1	0	1	1	475	3.88878	0	2	31.0014	39	4	643.074	2569.27	-1.30789	43.935	24565	24565	MS2	28/126	20130120_Brassica_A1.raw
	High	EITFNFPTIDKLDGQD	Unambiguous	1	1	Bra028087		HCD	1	0	1	1	293	3.88832	0	1	0.928576	22	2	926.952	1852.9	0.323253	92.0738	51676	51676	MS2	14/30	20130120_Brassica_A3.raw
	High	DRFLFcAEAIYK	Unambiguous	1	1	Bra028087	C6(Carbamidomethyl)	HCD	1	0	1	1	334	3.88777	0	1	7.80665	45	2	766.882	1532.76	-0.501271	39.8624	22237	22237	MS2	16/22	20130120_Brassica_A4.raw
	High	LNYYTPEYETKDTDILAAFR	Unambiguous	1	1	Bra028087		HCD	1	0	1	1	406	3.88678	0	1	3.34871	50	3	808.395	2423.17	-2.59126	44.0908	24622	24622	MS2	26/76	20130120_Brassica_A4.raw
	High	GGLDFTKDDENVNSQPFmR	Unambiguous	2	2	Bra028087 ;Bra041116	M18(Oxidation)	HCD	1	0	1	1	252	3.88588	0	1	0.842152	3	3	729.331	2185.98	-1.04157	33.4569	18702	18702	MS2	23/72	20130120_Brassica_A3.raw
	High	YGRPLLGcTIKPK	Unambiguous	2	2	Bra028087 ;Bra041116	C8(Carbamidomethyl)	HCD	1	0	1	1	232	3.87566	0	0	34.8348	14	3	501.622	1502.85	-0.700307	26.7882	14775	14775	MS2	27/48	20130120_Brassica_A4.raw
	High	YGRPLLGcTIKPK	Unambiguous	2	2	Bra028087 ;Bra041116	C8(Carbamidomethyl)	HCD	1	0	1	1	232	3.87402	0	0	2.92217	0	3	501.622	1502.85	-0.700307	26.5999	14704	14704	MS2	25/48	20130120_Brassica_A3.raw
	High	ESTLGFVDLLRDDYVEKDR	Unambiguous	1	1	Bra028087		HCD	1	0	1	1	452	3.87034	0	2	35.8935	50	4	568.288	2270.13	0.324523	92.0336	51655	51655	MS2	32/108	20130120_Brassica_A3.raw
	High	EITFNFPTIDKLDGQD	Unambiguous	1	1	Bra028087		HCD	1	0	1	1	294	3.86849	0	1	0	13	2	926.953	1852.9	1.24558	46.3228	25837	25837	MS2	15/30	20130120_Brassica_A2.raw
	High	ESTLGFVDLLRDDYVEK	Unambiguous	1	1	Bra028087		HCD	1	0	1	1	362	3.86381	0	1	0	50	2	1000.01	1999.01	3.87184	91.5806	51401	51401	MS2	19/32	20130120_Brassica_A3.raw
	High	DNGLLLHIHR	Unambiguous	2	2	Bra028087 ;Bra041116		HCD	1	0	1	1	291	3.85572	0	0	30.2419	38	2	594.335	1187.66	-2.20647	28.7741	15945	15945	MS2	15/18	20130120_Brassica_A1.raw
	High	LEGDRESTLGFVDLLR	Unambiguous	1	1	Bra028087		HCD	1	0	1	1	347	3.85431	0	1	6.71278	50	3	607.328	1819.97	7.26524	91.7679	51393	51393	MS2	21/60	20130120_Brassica_A1.raw
	High	LEGDRESTLGFVDLLR	Unambiguous	1	1	Bra028087		HCD	1	0	1	1	349	3.84785	0	1	1.08262	50	3	607.323	1819.95	-0.481672	93.1639	52280	52280	MS2	21/60	20130120_Brassica_A3.raw
	High	YGRPLLGcTIKPK	Unambiguous	2	2	Bra028087 ;Bra041116	C8(Carbamidomethyl)	HCD	1	0	1	1	232	3.84725	0	0	54.1545	49	3	501.622	1502.85	-0.761226	27.0216	14898	14898	MS2	24/48	20130120_Brassica_A6.raw
	High	GGLDFTKDDENVNSQPFmR	Unambiguous	2	2	Bra028087 ;Bra041116	M18(Oxidation)	HCD	1	0	1	1	263	3.84268	0	1	0	0	3	729.331	2185.98	-1.29286	33.1163	18502	18502	MS2	25/72	20130120_Brassica_A3.raw
	High	VTPQPGVPPEEAGAAVAAESSTGTWTTVWTDGLTSLDR	Unambiguous	1	1	Bra028087		HCD	1	0	1	1	433	3.84138	0	0	0	50	3	1285.63	3854.88	1.81905	54.1734	30259	30259	MS2	31/148	20130120_Brassica_A4.raw
	High	VTPQPGVPPEEAGAAVAAESSTGTWTTVWTDGLTSLDR	Unambiguous	1	1	Bra028087		HCD	1	0	1	1	444	3.83579	0	0	0	50	3	1285.63	3854.87	0.679056	52.4582	29128	29128	MS2	27/148	20130120_Brassica_A7.raw
	High	GGLDFTKDDENVNSQPFmR	Unambiguous	2	2	Bra028087 ;Bra041116	M18(Oxidation)	HCD	1	0	1	1	249	3.83224	0	1	0.605664	2	3	729.331	2185.98	-0.957808	33.6727	18759	18759	MS2	23/72	20130120_Brassica_A1.raw
	High	VTPQPGVPPEEAGAAVAAESSTGTWTTVWTDGLTSLDR	Unambiguous	1	1	Bra028087		HCD	1	0	1	1	438	3.83085	0	0	0	50	4	964.473	3854.87	-0.163594	61.4518	34454	34454	MS2	45/222	20130120_Brassica_A3.raw
	High	VTPQPGVPPEEAGAAVAAESSTGTWTTVWTDGLTSLDR	Unambiguous	1	1	Bra028087		HCD	1	0	1	1	441	3.82454	0	0	0	50	3	1285.63	3854.88	1.15405	55.7327	31176	31176	MS2	28/148	20130120_Brassica_A1.raw
	High	LSGGDHVHAGTVVGK	Unambiguous	1	1	Bra028087		HCD	1	0	1	1	379	3.8217	0	0	10.8419	11	4	359.192	1433.75	-1.08368	21.6641	11871	11871	MS2	29/84	20130120_Brassica_A3.raw
	High	EITFNFPTIDKLDGQD	Unambiguous	1	1	Bra028087		HCD	1	0	1	1	285	3.80724	0	1	0	50	2	926.951	1852.9	-0.533197	95.9802	53836	53836	MS2	15/30	20130120_Brassica_A3.raw
	High	GGLDFTKDDENVNSQPFmR	Unambiguous	2	2	Bra028087 ;Bra041116	M18(Oxidation)	HCD	1	0	1	1	252	3.80694	0	1	1.07042	0	3	729.332	2185.98	-0.0364088	32.8558	18349	18349	MS2	25/72	20130120_Brassica_A3.raw
	High	LEGDRESTLGFVDLLR	Unambiguous	1	1	Bra028087		HCD	1	0	1	1	363	3.80458	0	1	1.39794	14	3	607.324	1819.96	0.725647	42.0179	23571	23571	MS2	21/60	20130120_Brassica_A3.raw
	High	TFQGPPHGIQVER	Unambiguous	2	2	Bra028087 ;Bra041116		HCD	1	0	1	1	354	3.80268	0	0	45.1296	37	2	733.382	1465.76	0.73928	28.2445	15602	15602	MS2	22/24	20130120_Brassica_A2.raw
	High	VTPQPGVPPEEAGAAVAAESSTGTWTTVWTDGLTSLDR	Unambiguous	1	1	Bra028087		HCD	1	0	1	1	318	3.79962	0	0	0	50	2	1927.93	3854.85	-4.81162	63.3211	35509	35509	MS2	23/74	20130120_Brassica_A3.raw
	High	EITFNFPTIDKLDGQD	Unambiguous	1	1	Bra028087		HCD	1	0	1	1	291	3.79181	0	1	4.08947	50	2	926.951	1852.9	-0.599078	92.8524	52108	52108	MS2	14/30	20130120_Brassica_A3.raw
	High	EITFNFPTIDKLDGQD	Unambiguous	1	1	Bra028087		HCD	1	0	1	1	289	3.78602	0	1	1.65865	50	2	926.952	1852.9	0.455015	93.3725	52396	52396	MS2	15/30	20130120_Brassica_A3.raw
	High	GGLDFTKDDENVNSQPFmR	Unambiguous	2	2	Bra028087 ;Bra041116	M18(Oxidation)	HCD	1	0	1	1	206	3.77748	0	1	0	50	2	1093.49	2185.98	-0.337391	34.4148	19127	19127	MS2	18/36	20130120_Brassica_A2.raw
	High	DNGLLLHIHR	Unambiguous	2	2	Bra028087 ;Bra041116		HCD	1	0	1	1	328	3.76428	0	0	10.2089	2	2	594.335	1187.66	-1.07586	28.1839	15637	15637	MS2	15/18	20130120_Brassica_A3.raw
	High	LEGDRESTLGFVDLLR	Unambiguous	1	1	Bra028087		HCD	1	0	1	1	343	3.76218	0	1	17.3957	50	3	607.328	1819.97	8.27132	91.7767	51343	51343	MS2	22/60	20130120_Brassica_A2.raw
	High	LEGDRESTLGFVDLLRDDYVEK	Unambiguous	1	1	Bra028087		HCD	1	0	1	1	471	3.75909	0	2	0.496791	11	3	857.098	2569.28	0.170206	43.2431	24268	24268	MS2	27/84	20130120_Brassica_A3.raw
	High	LEGDRESTLGFVDLLR	Unambiguous	1	1	Bra028087		HCD	1	0	1	1	350	3.7569	0	1	9.89763	50	3	607.323	1819.95	-0.481672	97.1634	54487	54487	MS2	20/60	20130120_Brassica_A3.raw
	High	TFQGPPHGIQVER	Unambiguous	2	2	Bra028087 ;Bra041116		HCD	1	0	1	1	351	3.75444	0	0	0	0	2	733.38	1465.75	-1.09291	27.5833	15281	15281	MS2	21/24	20130120_Brassica_A3.raw
	High	DNGLLLHIHR	Unambiguous	2	2	Bra028087 ;Bra041116		HCD	1	0	1	1	333	3.7518	0	0	0	4	2	594.336	1187.66	0.0547374	28.9967	16036	16036	MS2	14/18	20130120_Brassica_A2.raw
	High	ESTLGFVDLLRDDYVEKDR	Unambiguous	1	1	Bra028087		HCD	1	0	1	1	437	3.75081	0	2	35.4637	50	4	568.29	2270.14	3.55085	91.7419	51492	51492	MS2	29/108	20130120_Brassica_A3.raw
	High	LSGGDHVHAGTVVGK	Unambiguous	1	1	Bra028087		HCD	1	0	1	1	354	3.74995	0	0	0	50	2	717.378	1433.75	-0.724356	21.6774	11878	11878	MS2	21/28	20130120_Brassica_A3.raw
	High	ELGVPIVmHDYLTGGFTANTSLAHYcR	Unambiguous	1	1	Bra028087	M8(Oxidation); C26(Carbamidomethyl)	HCD	1	0	1	1	400	3.74714	0	0	19.1068	50	4	760.37	3038.46	2.68238	91.5469	51272	51272	MS2	37/156	20130120_Brassica_A1.raw
	High	YGRPLLGcTIKPK	Unambiguous	2	2	Bra028087 ;Bra041116	C8(Carbamidomethyl)	HCD	1	0	1	1	232	3.74451	0	0	5.3179	3	3	501.622	1502.85	-0.456629	27.0927	14970	14970	MS2	23/48	20130120_Brassica_A1.raw
	High	ESTLGFVDLLRDDYVEKDR	Unambiguous	1	1	Bra028087		HCD	1	0	1	1	437	3.74138	0	2	35.4637	50	4	568.29	2270.14	3.55085	91.7364	51488	51488	MS2	30/108	20130120_Brassica_A3.raw
	High	ELGVPIVmHDYLTGGFTANTSLAHYcR	Unambiguous	1	1	Bra028087	M8(Oxidation); C26(Carbamidomethyl)	HCD	1	0	1	1	413	3.74125	0	0	5.11647	50	3	1013.49	3038.46	4.91651	91.5859	51238	51238	MS2	25/104	20130120_Brassica_A2.raw
	High	VTPQPGVPPEEAGAAVAAESSTGTWTTVWTDGLTSLDR	Unambiguous	1	1	Bra028087		HCD	1	0	1	1	415	3.73785	0	0	0	50	3	1285.63	3854.87	-1.03094	56.1129	31348	31348	MS2	29/148	20130120_Brassica_A4.raw
	High	EITFNFPTIDKLDGQD	Unambiguous	1	1	Bra028087		HCD	1	0	1	1	286	3.73447	0	1	0.890839	29	2	926.952	1852.9	-0.335555	92.3324	51820	51820	MS2	15/30	20130120_Brassica_A3.raw
	High	ESTLGFVDLLRDDYVEKDR	Unambiguous	1	1	Bra028087		HCD	1	0	1	1	357	3.73397	0	2	5.24508	50	2	1135.57	2270.13	0.067508	42.7656	23995	23995	MS2	18/36	20130120_Brassica_A3.raw
	High	GHYLNATAGTcEEmmKR	Unambiguous	1	1	Bra028087	C11(Carbamidomethyl); M14(Oxidation); M15(Oxidation)	HCD	1	0	1	1	152	3.72787	0	1	71.775	50	3	667.627	2000.87	1.31897	22.6465	12444	12444	MS2	25/64	20130120_Brassica_A1.raw
	High	LNYYTPEYETKDTDILAAFR	Unambiguous	1	1	Bra028087		HCD	1	0	1	1	413	3.7238	0	1	11.5273	50	3	808.394	2423.17	-3.49804	43.6829	24425	24425	MS2	27/76	20130120_Brassica_A1.raw
	High	VTPQPGVPPEEAGAAVAAESSTGTWTTVWTDGLTSLDR	Unambiguous	1	1	Bra028087		HCD	1	0	1	1	434	3.72099	0	0	82.1982	50	3	1285.63	3854.89	3.43403	51.1215	28679	28679	MS2	27/148	20130120_Brassica_A3.raw
	High	TFQGPPHGIQVER	Unambiguous	2	2	Bra028087 ;Bra041116		HCD	1	0	1	1	368	3.719	0	0	39.9418	40	2	733.383	1465.76	2.32162	28.095	15549	15549	MS2	21/24	20130120_Brassica_A1.raw
	High	LEGDRESTLGFVDLLR	Unambiguous	1	1	Bra028087		HCD	1	0	1	1	344	3.71565	0	1	2.34926	50	3	607.325	1819.96	3.34149	92.027	51536	51536	MS2	20/60	20130120_Brassica_A1.raw
	High	EYKLNYYTPEYETK	Unambiguous	1	1	Bra028087		HCD	1	0	1	1	290	3.71466	0	1	0	50	2	920.938	1840.87	2.49153	33.2504	18460	18460	MS2	17/26	20130120_Brassica_A2.raw
	High	ESTLGFVDLLRDDYVEK	Unambiguous	1	1	Bra028087		HCD	1	0	1	1	370	3.71107	0	1	0	50	2	1000.01	1999.01	1.85669	45.7243	25537	25537	MS2	19/32	20130120_Brassica_A4.raw
	High	GGLDFTKDDENVNSQPFmR	Unambiguous	2	2	Bra028087 ;Bra041116	M18(Oxidation)	HCD	1	0	1	1	200	3.7098	0	1	0.390732	1	2	1093.49	2185.98	-1.0075	33.408	18605	18605	MS2	20/36	20130120_Brassica_A1.raw
	High	ELGVPIVmHDYLTGGFTANTSLAHYcR	Unambiguous	1	1	Bra028087	M8(Oxidation); C26(Carbamidomethyl)	HCD	1	0	1	1	409	3.70623	0	0	19.9137	50	4	760.366	3038.44	-2.5404	42.3077	23737	23737	MS2	33/156	20130120_Brassica_A3.raw
	High	TFQGPPHGIQVER	Unambiguous	2	2	Bra028087 ;Bra041116		HCD	1	0	1	1	344	3.70052	0	0	3.24718	0	2	733.38	1465.75	-1.42604	27.8423	15434	15434	MS2	20/24	20130120_Brassica_A3.raw
	High	LNYYTPEYETK	Unambiguous	1	1	Bra028087		HCD	1	0	1	1	185	3.69629	0	0	0	50	1	1420.66	1420.66	-3.44781	31.0158	17231	17231	MS2	14/20	20130120_Brassica_A1.raw
	High	ESTLGFVDLLRDDYVEKDR	Unambiguous	1	1	Bra028087		HCD	1	0	1	1	431	3.69524	0	2	0	28	3	757.381	2270.13	-1.12141	43.3742	24228	24228	MS2	24/72	20130120_Brassica_A5.raw
	High	GHYLNATAGTcEEmmK	Unambiguous	1	1	Bra028087	C11(Carbamidomethyl); M14(Oxidation); M15(Oxidation)	HCD	1	0	1	1	47	3.6922	0	0	0	50	2	922.883	1844.76	-1.18416	23.6663	13019	13019	MS2	18/30	20130120_Brassica_A1.raw
	High	ESTLGFVDLLRDDYVEKDR	Unambiguous	1	1	Bra028087		HCD	1	0	1	1	420	3.6875	0	2	64.6724	33	3	757.384	2270.14	2.7502	43.3161	24308	24308	MS2	21/72	20130120_Brassica_A3.raw
	High	VTPQPGVPPEEAGAAVAAESSTGTWTTVWTDGLTSLDR	Unambiguous	1	1	Bra028087		HCD	1	0	1	1	426	3.68736	0	0	0	50	3	1285.63	3854.86	-2.45593	81.469	45721	45721	MS2	26/148	20130120_Brassica_A3.raw
	High	TFQGPPHGIQVER	Unambiguous	2	2	Bra028087 ;Bra041116		HCD	1	0	1	1	293	3.68321	0	0	0	36	1	1465.76	1465.76	0.956657	27.6011	15292	15292	MS2	18/24	20130120_Brassica_A3.raw
	High	GHYLNATAGTcEEmmK	Unambiguous	1	1	Bra028087	C11(Carbamidomethyl); M14(Oxidation); M15(Oxidation)	HCD	1	0	1	1	48	3.67615	0	0	0	50	2	922.883	1844.76	-1.31651	23.7727	13051	13051	MS2	18/30	20130120_Brassica_A2.raw
	High	VTPQPGVPPEEAGAAVAAESSTGTWTTVWTDGLTSLDR	Unambiguous	1	1	Bra028087		HCD	1	0	1	1	430	3.67377	0	0	0	50	3	1285.63	3854.87	0.204059	54.6264	30553	30553	MS2	26/148	20130120_Brassica_A1.raw
	High	LSGGDHVHAGTVVGK	Unambiguous	1	1	Bra028087		HCD	1	0	1	1	379	3.67025	0	0	0	38	3	478.588	1433.75	-1.11687	21.5675	11837	11837	MS2	23/56	20130120_Brassica_A1.raw
	High	LNYYTPEYETK	Unambiguous	1	1	Bra028087		HCD	1	0	1	1	199	3.66652	0	0	0	36	1	1420.66	1420.66	-0.440431	30.3402	16894	16894	MS2	15/20	20130120_Brassica_A3.raw
	High	GGLDFTKDDENVNSQPFmR	Unambiguous	2	2	Bra028087 ;Bra041116	M18(Oxidation)	HCD	1	0	1	1	257	3.66599	0	1	38.9967	27	3	729.333	2185.98	0.801225	33.8195	18815	18815	MS2	23/72	20130120_Brassica_A5.raw
	High	VTPQPGVPPEEAGAAVAAESSTGTWTTVWTDGLTSLDR	Unambiguous	1	1	Bra028087		HCD	1	0	1	1	430	3.66593	0	0	0	50	4	964.472	3854.87	-1.30359	59.0158	33087	33087	MS2	47/222	20130120_Brassica_A3.raw
	High	VTPQPGVPPEEAGAAVAAESSTGTWTTVWTDGLTSLDR	Unambiguous	1	1	Bra028087		HCD	1	0	1	1	406	3.66356	0	0	0	50	3	1285.63	3854.87	-0.555937	55.0269	30738	30738	MS2	25/148	20130120_Brassica_A4.raw
	High	WSPELAAAcEVWK	Unambiguous	2	2	Bra028087 ;Bra041116	C9(Carbamidomethyl)	HCD	1	0	1	1	233	3.66298	0	0	0	50	1	1546.74	1546.74	0.319967	42.5707	23734	23734	MS2	19/24	20130120_Brassica_A2.raw
	High	VTPQPGVPPEEAGAAVAAESSTGTWTTVWTDGLTSLDR	Unambiguous	1	1	Bra028087		HCD	1	0	1	1	441	3.65618	0	0	3.75986	50	4	964.476	3854.88	2.49639	55.9757	31388	31388	MS2	49/222	20130120_Brassica_A3.raw
	High	ESTLGFVDLLRDDYVEKDR	Unambiguous	1	1	Bra028087		HCD	1	0	1	1	434	3.65207	0	2	9.0154	50	4	568.287	2270.13	-1.39619	94.3184	52919	52919	MS2	28/108	20130120_Brassica_A3.raw
	High	DNGLLLHIHR	Unambiguous	2	2	Bra028087 ;Bra041116		HCD	1	0	1	1	352	3.64972	0	0	23.6159	36	2	594.338	1187.67	3.0354	28.9787	16036	16036	MS2	14/18	20130120_Brassica_A4.raw
	High	YGRPLLGcTIKPK	Unambiguous	2	2	Bra028087 ;Bra041116	C8(Carbamidomethyl)	HCD	1	0	1	1	228	3.64622	0	0	0.34294	0	3	501.621	1502.85	-1.24858	26.3424	14553	14553	MS2	25/48	20130120_Brassica_A3.raw
	High	YGRPLLGcTIKPK	Unambiguous	2	2	Bra028087 ;Bra041116	C8(Carbamidomethyl)	HCD	1	0	1	1	194	3.64441	0	0	51.6402	15	3	501.622	1502.85	0.213484	27.1954	15006	15006	MS2	25/48	20130120_Brassica_A4.raw
	High	GHYLNATAGTCEEmMKR	Unambiguous	1	1	Bra028087	M14(Oxidation)	HCD		0.0808	2	2	214	3.64114	0	1	25.3322	50	3	643.293	1927.86	9.13668	22.3997	12286	12286	MS2	25/64	20130120_Brassica_A3.raw
	High	ESTLGFVDLLRDDYVEKDR	Unambiguous	1	1	Bra028087		HCD	1	0	1	1	433	3.6386	0	2	1.71494	2	3	757.381	2270.13	-0.234163	43.4836	24311	24311	MS2	25/72	20130120_Brassica_A1.raw
	High	ELGVPIVmHDYLTGGFTANTSLAHYcR	Unambiguous	1	1	Bra028087	M8(Oxidation); C26(Carbamidomethyl)	HCD	1	0	1	1	395	3.6194	0	0	0	25	4	760.368	3038.45	0.352222	41.519	23204	23204	MS2	36/156	20130120_Brassica_A1.raw
	High	ESTLGFVDLLRDDYVEKDR	Unambiguous	1	1	Bra028087		HCD	1	0	1	1	435	3.61814	0	2	0.375064	1	4	568.288	2270.13	-0.320745	42.8176	24026	24026	MS2	29/108	20130120_Brassica_A3.raw
	High	LEGDRESTLGFVDLLR	Unambiguous	1	1	Bra028087		HCD	1	0	1	1	349	3.6068	0	1	4.14012	50	3	607.323	1819.96	0.121988	92.2875	51680	51680	MS2	18/60	20130120_Brassica_A1.raw
	High	GGLDFTKDDENVNSQPFmR	Unambiguous	2	2	Bra028087 ;Bra041116	M18(Oxidation)	HCD	1	0	1	1	258	3.60566	0	1	4.44443	50	3	729.333	2185.98	1.30381	91.9726	51452	51452	MS2	26/72	20130120_Brassica_A2.raw
	High	ESTLGFVDLLRDDYVEK	Unambiguous	1	1	Bra028087		HCD	1	0	1	1	396	3.60285	0	1	0.56252	9	3	667.005	1999	-0.562126	45.841	25569	25569	MS2	26/64	20130120_Brassica_A2.raw
	High	LSGGDHVHAGTVVGK	Unambiguous	1	1	Bra028087		HCD	1	0	1	1	371	3.60033	0	0	0.438225	39	3	478.588	1433.75	-0.606024	21.7757	11924	11924	MS2	23/56	20130120_Brassica_A2.raw
	High	VTPQPGVPPEEAGAAVAAESSTGTWTTVWTDGLTSLDR	Unambiguous	1	1	Bra028087		HCD	1	0	1	1	425	3.59942	0	0	0.82268	33	4	964.472	3854.87	-1.11359	52.5068	29367	29367	MS2	42/222	20130120_Brassica_A1.raw
	High	VTPQPGVPPEEAGAAVAAESSTGTWTTVWTDGLTSLDR	Unambiguous	1	1	Bra028087		HCD	1	0	1	1	431	3.59743	0	0	0	50	3	1285.63	3854.87	-0.0809394	53.9157	30116	30116	MS2	27/148	20130120_Brassica_A4.raw
	High	ESTLGFVDLLRDDYVEKDR	Unambiguous	1	1	Bra028087		HCD	1	0	1	1	441	3.5957	0	2	0.540322	2	3	757.382	2270.13	0.088471	42.7787	24002	24002	MS2	23/72	20130120_Brassica_A3.raw
	High	LEGDRESTLGFVDLLR	Unambiguous	1	1	Bra028087		HCD	1	0	1	1	365	3.58781	0	1	2.13837	50	3	607.323	1819.96	0.323208	94.22	52864	52864	MS2	20/60	20130120_Brassica_A3.raw
	High	TFQGPPHGIQVER	Unambiguous	2	2	Bra028087 ;Bra041116		HCD	1	0	1	1	373	3.5801	0	0	1.95714	1	3	489.257	1465.75	0.167956	28.3145	15659	15659	MS2	26/48	20130120_Brassica_A5.raw
	High	LEGDRESTLGFVDLLR	Unambiguous	1	1	Bra028087		HCD	1	0	1	1	348	3.57573	0	1	3.71847	30	3	607.323	1819.95	-0.984722	43.5166	24330	24330	MS2	19/60	20130120_Brassica_A1.raw
	High	VTPQPGVPPEEAGAAVAAESSTGTWTTVWTDGLTSLDR	Unambiguous	1	1	Bra028087		HCD	1	0	1	1	429	3.57485	0	0	0	50	3	1285.63	3854.87	0.584057	53.1372	29656	29656	MS2	25/148	20130120_Brassica_A2.raw
	High	ESTLGFVDLLRDDYVEKDR	Unambiguous	1	1	Bra028087		HCD	1	0	1	1	430	3.56789	0	2	0	12	3	757.381	2270.13	-1.04075	43.3924	24239	24239	MS2	23/72	20130120_Brassica_A5.raw
	High	LEGDRESTLGFVDLLR	Unambiguous	1	1	Bra028087		HCD	1	0	1	1	360	3.56191	0	1	17.4652	49	3	607.321	1819.95	-2.79571	43.6373	24334	24334	MS2	18/60	20130120_Brassica_A2.raw
	High	LEGDRESTLGFVDLLR	Unambiguous	1	1	Bra028087		HCD	1	0	1	1	309	3.56133	0	1	2.19189	12	2	910.483	1819.96	1.57145	42.4913	23839	23839	MS2	21/30	20130120_Brassica_A3.raw
	High	GHYLNATAGTcEEmmK	Unambiguous	1	1	Bra028087	C11(Carbamidomethyl); M14(Oxidation); M15(Oxidation)	HCD	1	0	1	1	54	3.56077	0	0	3.101	28	3	615.591	1844.76	-0.926768	23.861	13121	13121	MS2	19/60	20130120_Brassica_A3.raw
	High	DNGLLLHIHR	Unambiguous	2	2	Bra028087 ;Bra041116		HCD	1	0	1	1	336	3.55691	0	0	11.2274	2	2	594.336	1187.66	-0.0480444	29.0337	16094	16094	MS2	14/18	20130120_Brassica_A1.raw
	High	ELGVPIVMHDYLTGGFTANTSLAHYcR	Unambiguous	1	1	Bra028087	C26(Carbamidomethyl)	HCD	1	0	1	1	462	3.55288	0	0	21.3008	50	4	756.367	3022.45	-2.94384	44.6873	25079	25079	MS2	35/156	20130120_Brassica_A3.raw
	High	DDENVNSQPFMR	Unambiguous	2	2	Bra028087 ;Bra041116		HCD	1	0	1	1	79	3.54585	0	0	29.0058	30	2	726.311	1451.62	-4.74051	29.2755	16276	16276	MS2	14/22	20130120_Brassica_A3.raw
	High	GHYLNATAGTcEEmmKR	Unambiguous	1	1	Bra028087	C11(Carbamidomethyl); M14(Oxidation); M15(Oxidation)	HCD	1	0	1	1	145	3.54186	0	1	0	50	3	667.625	2000.86	-1.60945	22.8328	12541	12541	MS2	24/64	20130120_Brassica_A5.raw
	High	EITFNFPTIDKLDGQD	Unambiguous	1	1	Bra028087		HCD	1	0	1	1	261	3.53789	0	1	49.6083	50	1	1852.9	1852.9	-0.756524	46.2949	25981	25981	MS2	17/30	20130120_Brassica_A3.raw
	High	VTPQPGVPPEEAGAAVAAESSTGTWTTVWTDGLTSLDR	Unambiguous	1	1	Bra028087		HCD	1	0	1	1	429	3.52348	0	0	2.16725	50	3	1285.63	3854.88	0.964054	58.887	32903	32903	MS2	23/148	20130120_Brassica_A4.raw
	High	EITFNFPTIDKLDGQD	Unambiguous	1	1	Bra028087		HCD	1	0	1	1	308	3.52313	0	1	0	50	2	926.952	1852.9	-0.203793	45.7916	25541	25541	MS2	15/30	20130120_Brassica_A2.raw
	High	LSGGDHVHAGTVVGK	Unambiguous	1	1	Bra028087		HCD	1	0	1	1	379	3.52129	0	0	0.19908	8	3	478.588	1433.75	-0.861446	21.6525	11865	11865	MS2	24/56	20130120_Brassica_A3.raw
	High	VTPQPGVPPEEAGAAVAAESSTGTWTTVWTDGLTSLDR	Unambiguous	1	1	Bra028087		HCD	1	0	1	1	444	3.52094	0	0	2.32928	37	4	964.474	3854.87	0.406403	52.4063	29270	29270	MS2	43/222	20130120_Brassica_A4.raw
	High	GGLDFTKDDENVNSQPFmR	Unambiguous	2	2	Bra028087 ;Bra041116	M18(Oxidation)	HCD	1	0	1	1	291	3.51697	0	1	7.3386	50	3	729.335	2185.99	3.73293	91.946	51491	51491	MS2	23/72	20130120_Brassica_A1.raw
	High	EITFNFPTIDKLDGQD	Unambiguous	1	1	Bra028087		HCD	1	0	1	1	280	3.5116	0	1	1.00244	50	2	926.951	1852.9	-0.401436	93.1137	52252	52252	MS2	14/30	20130120_Brassica_A3.raw
	High	TFQGPPHGIQVER	Unambiguous	2	2	Bra028087 ;Bra041116		HCD	1	0	1	1	381	3.50913	0	0	0	6	3	489.256	1465.75	0.105495	28.2534	15606	15606	MS2	24/48	20130120_Brassica_A2.raw
	High	ESTLGFVDLLRDDYVEKDR	Unambiguous	1	1	Bra028087		HCD	1	0	1	1	435	3.50906	0	2	74.9044	50	4	568.288	2270.13	-0.320745	92.1411	51714	51714	MS2	29/108	20130120_Brassica_A3.raw
	High	LSGGDHVHAGTVVGK	Unambiguous	1	1	Bra028087		HCD	1	0	1	1	339	3.50798	0	0	6.7846	50	2	717.378	1433.75	0.0419096	21.4116	11728	11728	MS2	20/28	20130120_Brassica_A3.raw
	High	GGLDFTKDDENVNSQPFmR	Unambiguous	2	2	Bra028087 ;Bra041116	M18(Oxidation)	HCD	1	0	1	1	261	3.50645	0	1	2.30082	50	3	729.333	2185.98	0.549935	92.9499	52162	52162	MS2	24/72	20130120_Brassica_A3.raw
	High	GHYLNATAGTcEEmmKR	Unambiguous	1	1	Bra028087	C11(Carbamidomethyl); M14(Oxidation); M15(Oxidation)	HCD	1	0	1	1	143	3.5061	0	1	0	50	3	667.625	2000.86	-1.06037	23.0545	12659	12659	MS2	25/64	20130120_Brassica_A4.raw
	High	LNYYTPEYETK	Unambiguous	1	1	Bra028087		HCD	1	0	1	1	203	3.50464	0	0	12.5979	2	1	1420.66	1420.66	-1.21376	30.6016	17047	17047	MS2	15/20	20130120_Brassica_A3.raw
	High	EITFNFPTIDKLDGQD	Unambiguous	1	1	Bra028087		HCD	1	0	1	1	285	3.49953	0	1	0	50	2	926.951	1852.9	-0.73084	93.6332	52540	52540	MS2	16/30	20130120_Brassica_A3.raw
	High	GHYLNATAGTcEEmmK	Unambiguous	1	1	Bra028087	C11(Carbamidomethyl); M14(Oxidation); M15(Oxidation)	HCD	1	0	1	1	54	3.49648	0	0	0	50	3	615.591	1844.76	-1.02602	23.623	12996	12996	MS2	24/60	20130120_Brassica_A1.raw
	High	TFQGPPHGIQVER	Unambiguous	2	2	Bra028087 ;Bra041116		HCD	1	0	1	1	354	3.4951	0	0	0.714156	0	2	733.38	1465.75	-1.34276	28.3666	15707	15707	MS2	21/24	20130120_Brassica_A1.raw
	High	TFQGPPHGIQVER	Unambiguous	2	2	Bra028087 ;Bra041116		HCD	1	0	1	1	362	3.4911	0	0	9.10793	3	2	733.381	1465.75	-0.260098	28.36	15739	15739	MS2	18/24	20130120_Brassica_A3.raw
	High	EITFNFPTIDKLDGQD	Unambiguous	1	1	Bra028087		HCD	1	0	1	1	309	3.47737	0	1	1.07148	17	2	926.959	1852.91	7.37245	46.8464	26164	26164	MS2	15/30	20130120_Brassica_A4.raw
	High	DLAVEGNEIIR	Unambiguous	1	1	Bra028087		HCD	1	0	1	1	173	3.47215	0	0	0	50	1	1228.65	1228.65	-0.150668	34.0095	18893	18893	MS2	17/20	20130120_Brassica_A2.raw
	High	EITFNFPTIDKLDGQD	Unambiguous	1	1	Bra028087		HCD	1	0	1	1	289	3.47098	0	1	0	50	2	926.952	1852.9	0.455015	93.8937	52684	52684	MS2	15/30	20130120_Brassica_A3.raw
	High	TFQGPPHGIQVER	Unambiguous	2	2	Bra028087 ;Bra041116		HCD	1	0	1	1	351	3.4693	0	0	1.99935	0	2	733.38	1465.75	-1.42604	28.1001	15586	15586	MS2	19/24	20130120_Brassica_A3.raw
	High	ESTLGFVDLLRDDYVEKDR	Unambiguous	1	1	Bra028087		HCD	1	0	1	1	437	3.46371	0	2	0.907047	8	3	757.381	2270.13	-0.0728462	43.8773	24469	24469	MS2	20/72	20130120_Brassica_A2.raw
	High	GGLDFTKDDENVNSQPFmR	Unambiguous	2	2	Bra028087 ;Bra041116	M18(Oxidation)	HCD	1	0	1	1	256	3.46037	0	1	0.24581	0	3	729.331	2185.98	-1.12534	33.377	18655	18655	MS2	24/72	20130120_Brassica_A3.raw
	High	DLAVEGNEIIR	Unambiguous	1	1	Bra028087		HCD	1	0	1	1	160	3.45901	0	0	17.7007	5	1	1228.65	1228.65	-1.24355	33.6867	18767	18767	MS2	18/20	20130120_Brassica_A1.raw
	High	ESTLGFVDLLRDDYVEKDR	Unambiguous	1	1	Bra028087		HCD	1	0	1	1	417	3.45151	0	2	10.9156	50	3	757.38	2270.12	-2.41195	92.1545	51721	51721	MS2	23/72	20130120_Brassica_A3.raw
	High	LSGGDHVHAGTVVGK	Unambiguous	1	1	Bra028087		HCD	1	0	1	1	368	3.45079	0	0	9.03747	50	3	478.588	1433.75	-0.542168	21.9183	12014	12014	MS2	25/56	20130120_Brassica_A3.raw
	High	LEGDRESTLGFVDLLR	Unambiguous	1	1	Bra028087		HCD	1	0	1	1	343	3.44859	0	1	7.97683	13	3	607.323	1819.95	-1.08533	42.8564	24047	24047	MS2	21/60	20130120_Brassica_A3.raw
	High	LEGDRESTLGFVDLLR	Unambiguous	1	1	Bra028087		HCD	1	0	1	1	347	3.44852	0	1	6.76455	50	3	607.323	1819.95	-0.179842	93.9462	52713	52713	MS2	22/60	20130120_Brassica_A3.raw
	High	VTPQPGVPPEEAGAAVAAESSTGTWTTVWTDGLTSLDR	Unambiguous	1	1	Bra028087		HCD	1	0	1	1	446	3.44705	0	0	0	50	4	964.476	3854.88	2.36972	62.8609	35249	35249	MS2	41/222	20130120_Brassica_A3.raw
	High	TFQGPPHGIQVER	Unambiguous	2	2	Bra028087 ;Bra041116		HCD	1	0	1	1	379	3.44666	0	0	5.81464	8	3	489.256	1465.75	0.0430338	28.3439	15668	15668	MS2	27/48	20130120_Brassica_A4.raw
	High	GHYLNATAGTcEEmmKR	Unambiguous	1	1	Bra028087	C11(Carbamidomethyl); M14(Oxidation); M15(Oxidation)	HCD	1	0	1	1	144	3.44076	0	1	19.4036	50	3	667.625	2000.86	-0.877345	24.4342	13450	13450	MS2	18/64	20130120_Brassica_A3.raw
	High	LEGDRESTLGFVDLLR	Unambiguous	1	1	Bra028087		HCD	1	0	1	1	347	3.4348	0	1	1.2791	50	3	607.323	1819.95	-0.381062	93.6849	52568	52568	MS2	20/60	20130120_Brassica_A3.raw
	High	TFQGPPHGIQVER	Unambiguous	2	2	Bra028087 ;Bra041116		HCD	1	0	1	1	343	3.42984	0	0	13.7632	3	2	733.38	1465.75	-1.09291	28.6476	15843	15843	MS2	19/24	20130120_Brassica_A4.raw
	High	LEGDRESTLGFVDLLR	Unambiguous	1	1	Bra028087		HCD	1	0	1	1	360	3.4262	0	1	15.9275	50	3	607.322	1819.95	-2.59449	43.3027	23987	23987	MS2	17/60	20130120_Brassica_A7.raw
	High	TFQGPPHGIQVER	Unambiguous	2	2	Bra028087 ;Bra041116		HCD	1	0	1	1	355	3.42373	0	0	5.75366	2	2	733.38	1465.75	-0.759788	28.3856	15691	15691	MS2	21/24	20130120_Brassica_A4.raw
	High	WSPELAAAcEVWK	Unambiguous	2	2	Bra028087 ;Bra041116	C9(Carbamidomethyl)	HCD	1	0	1	1	240	3.4182	0	0	0	50	1	1546.73	1546.73	-1.73199	41.908	23509	23509	MS2	17/24	20130120_Brassica_A3.raw
	High	VTPQPGVPPEEAGAAVAAESSTGTWTTVWTDGLTSLDR	Unambiguous	1	1	Bra028087		HCD	1	0	1	1	424	3.4176	0	0	0	50	3	1285.63	3854.86	-2.64593	53.3871	29820	29820	MS2	26/148	20130120_Brassica_A4.raw
	High	VTPQPGVPPEEAGAAVAAESSTGTWTTVWTDGLTSLDR	Unambiguous	1	1	Bra028087		HCD	1	0	1	1	294	3.41144	0	0	100	50	2	1927.93	3854.85	-6.39496	58.6071	32857	32857	MS2	19/74	20130120_Brassica_A3.raw
	High	LEGDRESTLGFVDLLR	Unambiguous	1	1	Bra028087		HCD	1	0	1	1	350	3.41107	0	1	2.93622	50	3	607.323	1819.95	-0.179842	93.424	52424	52424	MS2	19/60	20130120_Brassica_A3.raw
	High	VTPQPGVPPEEAGAAVAAESSTGTWTTVWTDGLTSLDR	Unambiguous	1	1	Bra028087		HCD	1	0	1	1	409	3.40868	0	0	0	50	3	1285.63	3854.87	-1.22093	53.679	29960	29960	MS2	25/148	20130120_Brassica_A2.raw
	High	TFQGPPHGIQVER	Unambiguous	2	2	Bra028087 ;Bra041116		HCD	1	0	1	1	366	3.40716	0	0	11.3134	6	2	733.38	1465.75	-1.09291	28.6229	15892	15892	MS2	18/24	20130120_Brassica_A3.raw
	High	GGLDFTKDDENVNSQPFmR	Unambiguous	2	2	Bra028087 ;Bra041116	M18(Oxidation)	HCD	1	0	1	1	250	3.40714	0	1	10.9642	12	3	729.332	2185.98	-0.790281	34.0281	18917	18917	MS2	25/72	20130120_Brassica_A6.raw
	High	ELGVPIVmHDYLTGGFTANTSLAHYcR	Unambiguous	1	1	Bra028087	M8(Oxidation); C26(Carbamidomethyl)	HCD	1	0	1	1	396	3.40398	0	0	1.17189	4	4	760.367	3038.45	-1.01374	41.0816	23038	23038	MS2	34/156	20130120_Brassica_A3.raw
	High	DNGLLLHIHR	Unambiguous	2	2	Bra028087 ;Bra041116		HCD	1	0	1	1	300	3.40197	0	0	0	50	1	1187.66	1187.66	-1.62984	28.1968	15644	15644	MS2	14/18	20130120_Brassica_A3.raw
	High	GGLDFTKDDENVNSQPFmR	Unambiguous	2	2	Bra028087 ;Bra041116	M18(Oxidation)	HCD	1	0	1	1	206	3.40061	0	1	0	3	2	1093.49	2185.98	-0.78413	34.1435	18970	18970	MS2	20/36	20130120_Brassica_A2.raw
	High	LSGGDHVHAGTVVGK	Unambiguous	1	1	Bra028087		HCD	1	0	1	1	379	3.39013	0	0	1.57157	50	3	478.587	1433.75	-1.37229	21.5213	11781	11781	MS2	26/56	20130120_Brassica_A2.raw
	High	GGLDFTKDDENVNSQPFmR	Unambiguous	2	2	Bra028087 ;Bra041116	M18(Oxidation)	HCD	1	0	1	1	251	3.3876	0	1	3.86095	20	3	729.331	2185.98	-0.957808	34.2464	19056	19056	MS2	22/72	20130120_Brassica_A4.raw
	High	VTPQPGVPPEEAGAAVAAESSTGTWTTVWTDGLTSLDR	Unambiguous	1	1	Bra028087		HCD	1	0	1	1	440	3.38738	0	0	2.21114	50	4	964.475	3854.88	1.86306	52.4058	29275	29275	MS2	41/222	20130120_Brassica_A6.raw
	High	LEDLRIPPAYTK	Unambiguous	1	1	Bra028087		HCD	0.2278	0	1	1	243	3.38086	0	1	23.4122	13	2	708.398	1415.79	0.260738	32.2346	17932	17932	MS2	15/22	20130120_Brassica_A1.raw
	High	VTPQPGVPPEEAGAAVAAESSTGTWTTVWTDGLTSLDR	Unambiguous	1	1	Bra028087		HCD	1	0	1	1	426	3.37464	0	0	1.20866	50	3	1285.63	3854.87	0.394058	77.1878	43321	43321	MS2	23/148	20130120_Brassica_A3.raw
	High	GHYLNATAGTcEEmmKR	Unambiguous	1	1	Bra028087	C11(Carbamidomethyl); M14(Oxidation); M15(Oxidation)	HCD	1	0	1	1	148	3.37083	0	1	2.77855	23	4	500.971	2000.86	-0.395994	22.8965	12553	12553	MS2	25/96	20130120_Brassica_A2.raw
	High	VTPQPGVPPEEAGAAVAAESSTGTWTTVWTDGLTSLDR	Unambiguous	1	1	Bra028087		HCD	1	0	1	1	411	3.36919	0	0	0	50	3	1285.63	3854.87	-0.650937	53.8026	30092	30092	MS2	23/148	20130120_Brassica_A1.raw
	High	VTPQPGVPPEEAGAAVAAESSTGTWTTVWTDGLTSLDR	Unambiguous	1	1	Bra028087		HCD	1	0	1	1	443	3.36709	0	0	0.373933	47	4	964.474	3854.87	0.153071	53.1268	29798	29798	MS2	41/222	20130120_Brassica_A3.raw
	High	LSGGDHVHAGTVVGK	Unambiguous	1	1	Bra028087		HCD	1	0	1	1	344	3.36422	0	0	0	50	2	717.379	1433.75	0.12705	21.3215	11700	11700	MS2	19/28	20130120_Brassica_A1.raw
	High	LEDLRIPPAYTK	Unambiguous	1	1	Bra028087		HCD	1	0	1	1	243	3.36306	0	1	8.1436	7	2	708.398	1415.79	0.260738	31.6501	17653	17653	MS2	19/22	20130120_Brassica_A3.raw
	High	LNYYTPEYETK	Unambiguous	1	1	Bra028087		HCD	1	0	1	1	192	3.36105	0	0	10.5132	3	1	1420.66	1420.66	-0.870056	30.8602	17197	17197	MS2	15/20	20130120_Brassica_A3.raw
	High	GGLDFTKDDENVNSQPFmR	Unambiguous	2	2	Bra028087 ;Bra041116	M18(Oxidation)	HCD	1	0	1	1	253	3.35877	0	1	0.906258	50	3	729.332	2185.98	-0.203936	92.2067	51635	51635	MS2	24/72	20130120_Brassica_A1.raw
	High	WSPELAAAcEVWK	Unambiguous	2	2	Bra028087 ;Bra041116	C9(Carbamidomethyl)	HCD	1	0	1	1	237	3.35826	0	0	0	50	1	1546.74	1546.74	2.21407	42.4327	23720	23720	MS2	18/24	20130120_Brassica_A1.raw
	High	LEGDRESTLGFVDLLR	Unambiguous	1	1	Bra028087		HCD	1	0	1	1	349	3.3531	0	1	1.99555	15	3	607.323	1819.95	-0.582282	42.9479	23979	23979	MS2	19/60	20130120_Brassica_A4.raw
	High	DNGLLLHIHR	Unambiguous	2	2	Bra028087 ;Bra041116		HCD	1	0	1	1	352	3.35129	0	0	11.2988	45	2	594.338	1187.67	3.24096	28.8116	15950	15950	MS2	15/18	20130120_Brassica_A5.raw
	High	TFQGPPHGIQVER	Unambiguous	2	2	Bra028087 ;Bra041116		HCD	1	0	1	1	364	3.34699	0	0	7.64818	2	3	489.256	1465.75	-0.581578	27.5452	15260	15260	MS2	25/48	20130120_Brassica_A3.raw
	High	EITFNFPTIDKLDGQD	Unambiguous	1	1	Bra028087		HCD	1	0	1	1	285	3.33439	0	1	1.13349	25	2	926.952	1852.9	-0.137912	46.0167	25733	25733	MS2	14/30	20130120_Brassica_A1.raw
	High	ESTLGFVDLLRDDYVEKDR	Unambiguous	1	1	Bra028087		HCD	1	0	1	1	431	3.33193	0	2	0	28	3	757.381	2270.13	-1.12141	43.3755	24229	24229	MS2	22/72	20130120_Brassica_A5.raw
	High	VTPQPGVPPEEAGAAVAAESSTGTWTTVWTDGLTSLDR	Unambiguous	1	1	Bra028087		HCD	1	0	1	1	440	3.32918	0	0	11.0388	50	3	1285.63	3854.88	2.19904	58.2855	32564	32564	MS2	25/148	20130120_Brassica_A4.raw
	High	LEGDRESTLGFVDLLR	Unambiguous	1	1	Bra028087		HCD	1	0	1	1	360	3.32871	0	1	5.05301	50	3	607.324	1819.96	1.73174	92.5493	51824	51824	MS2	18/60	20130120_Brassica_A1.raw
	High	LEGDRESTLGFVDLLR	Unambiguous	1	1	Bra028087		HCD	1	0	1	1	349	3.3247	0	1	20.435	8	3	607.322	1819.95	-1.38716	42.6741	23831	23831	MS2	18/60	20130120_Brassica_A5.raw
	High	LEGDRESTLGFVDLLR	Unambiguous	1	1	Bra028087		HCD	1	0	1	1	350	3.31607	0	1	29.3569	29	3	607.323	1819.95	-0.582282	40.3523	22624	22624	MS2	21/60	20130120_Brassica_A3.raw
	High	ESTLGFVDLLRDDYVEKDR	Unambiguous	1	1	Bra028087		HCD	1	0	1	1	421	3.31144	0	2	30.0193	50	4	568.288	2270.13	-0.42829	92.4207	51870	51870	MS2	29/108	20130120_Brassica_A3.raw
	High	LEGDRESTLGFVDLLR	Unambiguous	1	1	Bra028087		HCD	1	0	1	1	350	3.30621	0	1	17.8978	50	3	607.323	1819.95	-0.280452	87.6938	49221	49221	MS2	20/60	20130120_Brassica_A3.raw
	High	DLAVEGNEIIR	Unambiguous	1	1	Bra028087		HCD	1	0	1	1	182	3.3048	0	0	15.2939	3	1	1228.65	1228.65	-1.64096	33.3177	18621	18621	MS2	18/20	20130120_Brassica_A3.raw
	High	GGLDFTKDDENVNSQPFmR	Unambiguous	2	2	Bra028087 ;Bra041116	M18(Oxidation)	HCD	1	0	1	1	262	3.30339	0	1	3.38227	50	3	729.333	2185.98	0.466172	93.221	52313	52313	MS2	21/72	20130120_Brassica_A3.raw
	High	TFQGPPHGIQVER	Unambiguous	2	2	Bra028087 ;Bra041116		HCD	1	0	1	1	336	3.29867	0	0	6.73756	7	2	733.381	1465.75	-0.0935352	28.7787	15911	15911	MS2	19/24	20130120_Brassica_A2.raw
	High	GGLDFTKDDENVNSQPFmR	Unambiguous	2	2	Bra028087 ;Bra041116	M18(Oxidation)	HCD	1	0	1	1	258	3.29758	0	1	9.4659	48	3	729.332	2185.98	0.0473546	34.5415	19199	19199	MS2	24/72	20130120_Brassica_A2.raw
	High	LEGDRESTLGFVDLLR	Unambiguous	1	1	Bra028087		HCD	1	0	1	1	349	3.29736	0	1	19.6462	33	3	607.322	1819.95	-1.38716	40.792	22796	22796	MS2	19/60	20130120_Brassica_A1.raw
	High	DLAVEGNEIIR	Unambiguous	1	1	Bra028087		HCD	1	0	1	1	194	3.28886	0	0	0	17	1	1228.65	1228.65	0.246744	33.0436	18460	18460	MS2	19/20	20130120_Brassica_A3.raw
	High	GHYLNATAGTcEEmmKR	Unambiguous	1	1	Bra028087	C11(Carbamidomethyl); M14(Oxidation); M15(Oxidation)	HCD	1	0	1	1	153	3.28528	0	1	4.23654	50	4	500.971	2000.86	-0.640029	22.6744	12459	12459	MS2	22/96	20130120_Brassica_A1.raw
	High	TFQGPPHGIQVER	Unambiguous	2	2	Bra028087 ;Bra041116		HCD	1	0	1	1	374	3.28372	0	0	68.5159	4	3	489.256	1465.75	-1.8308	28.7217	15914	15914	MS2	25/48	20130120_Brassica_A1.raw
	High	EITFNFPTIDKLDGQD	Unambiguous	1	1	Bra028087		HCD	1	0	1	1	312	3.28301	0	1	0	50	2	926.951	1852.89	-1.19201	45.5341	25396	25396	MS2	15/30	20130120_Brassica_A2.raw
	High	TFQGPPHGIQVER	Unambiguous	2	2	Bra028087 ;Bra041116		HCD	1	0	1	1	366	3.2828	0	0	6.63119	50	3	489.259	1465.76	4.97744	91.5873	51293	51293	MS2	25/48	20130120_Brassica_A1.raw
	High	LEGDRESTLGFVDLLRDDYVEK	Unambiguous	1	1	Bra028087		HCD	1	0	1	1	479	3.27664	0	2	24.7781	50	4	643.074	2569.28	-1.11784	44.0084	24561	24561	MS2	25/126	20130120_Brassica_A6.raw
	High	VTPQPGVPPEEAGAAVAAESSTGTWTTVWTDGLTSLDR	Unambiguous	1	1	Bra028087		HCD	1	0	1	1	447	3.27235	0	0	10.7503	50	4	964.475	3854.88	1.54639	59.2826	33235	33235	MS2	42/222	20130120_Brassica_A3.raw
	High	LEGDRESTLGFVDLLR	Unambiguous	1	1	Bra028087		HCD	1	0	1	1	348	3.27197	0	1	40.9934	50	3	607.328	1819.97	7.66767	91.6574	51325	51325	MS2	18/60	20130120_Brassica_A5.raw
	High	LEGDRESTLGFVDLLR	Unambiguous	1	1	Bra028087		HCD	1	0	1	1	340	3.27181	0	1	0.307889	1	3	607.323	1819.95	-0.0792319	42.9891	24033	24033	MS2	20/60	20130120_Brassica_A1.raw
	High	LEGDRESTLGFVDLLR	Unambiguous	1	1	Bra028087		HCD	1	0	1	1	297	3.26961	0	1		25	2	910.484	1819.96	3.359	43.0127	24136	24136	MS2	18/30	20130120_Brassica_A3.raw
	High	TFQGPPHGIQVER	Unambiguous	2	2	Bra028087 ;Bra041116		HCD	1	0	1	1	370	3.26905	0	0	36.3041	44	2	733.383	1465.76	2.32162	29.1669	16171	16171	MS2	17/24	20130120_Brassica_A1.raw
	High	ESTLGFVDLLRDDYVEK	Unambiguous	1	1	Bra028087		HCD	1	0	1	1	381	3.2668	0	1	3.22305	50	3	667.006	1999	0.903448	46.1291	25730	25730	MS2	24/64	20130120_Brassica_A2.raw
	High	DLAVEGNEIIR	Unambiguous	1	1	Bra028087		HCD	1	0	1	1	201	3.26616	0	0	0.30624	3	2	614.83	1228.65	-0.6087	33.5659	18697	18697	MS2	14/20	20130120_Brassica_A1.raw
	High	ELGVPIVmHDYLTGGFTANTSLAHYcR	Unambiguous	1	1	Bra028087	M8(Oxidation); C26(Carbamidomethyl)	HCD	1	0	1	1	398	3.25859	0	0	2.2612	18	4	760.367	3038.45	-1.25479	41.3482	23191	23191	MS2	34/156	20130120_Brassica_A3.raw
	High	VTPQPGVPPEEAGAAVAAESSTGTWTTVWTDGLTSLDR	Unambiguous	1	1	Bra028087		HCD	1	0	1	1	295	3.25726	0	0	0	50	2	1927.94	3854.87	-0.758282	52.4793	29286	29286	MS2	17/74	20130120_Brassica_A2.raw
	High	ESTLGFVDLLRDDYVEKDR	Unambiguous	1	1	Bra028087		HCD	1	0	1	1	444	3.24319	0	2	2.23326	7	4	568.288	2270.13	0.109434	43.6496	24375	24375	MS2	29/108	20130120_Brassica_A4.raw
	High	IPPAYTKTFQGPPHGIQVER	Unambiguous	1	1	Bra028087		HCD	1	0	1	1	273	3.24287	0	1	55.9112	4	4	559.802	2236.19	0.217163	31.4864	17558	17558	MS2	35/114	20130120_Brassica_A3.raw
	High	LEGDRESTLGFVDLLRDDYVEK	Unambiguous	1	1	Bra028087		HCD	1	0	1	1	467	3.24218	0	2	11.7288	50	3	857.097	2569.28	-0.186131	43.8079	24474	24474	MS2	29/84	20130120_Brassica_A5.raw
	High	ESTLGFVDLLRDDYVEKDR	Unambiguous	1	1	Bra028087		HCD	1	0	1	1	439	3.23865	0	2	23.5066	50	4	568.288	2270.13	-0.105656	92.6927	52020	52020	MS2	31/108	20130120_Brassica_A3.raw
	High	EITFNFPTIDKLDGQD	Unambiguous	1	1	Bra028087		HCD	1	0	1	1	325	3.23629	0	1	13.822	50	2	926.954	1852.9	2.43143	47.0418	26309	26309	MS2	15/30	20130120_Brassica_A1.raw
	High	EITFNFPTIDKLDGQD	Unambiguous	1	1	Bra028087		HCD	1	0	1	1	306	3.23085	0	1	20.1363	50	2	926.951	1852.9	-0.73084	47.7121	26773	26773	MS2	14/30	20130120_Brassica_A3.raw
	High	TFQGPPHGIQVER	Unambiguous	2	2	Bra028087 ;Bra041116		HCD	1	0	1	1	376	3.22891	0	0	13.399	50	3	489.257	1465.76	0.230417	28.8572	15884	15884	MS2	25/48	20130120_Brassica_A7.raw
	High	GGLDFTKDDENVNSQPFmR	Unambiguous	2	2	Bra028087 ;Bra041116	M18(Oxidation)	HCD	1	0	1	1	251	3.21715	0	1	0.128885	0	3	729.332	2185.98	-0.203936	33.4093	18606	18606	MS2	22/72	20130120_Brassica_A1.raw
	High	DDENVNSQPFmR	Unambiguous	2	2	Bra028087 ;Bra041116	M11(Oxidation)	HCD	1	0	1	1	64	3.20886	0	0	16.3906	14	2	734.312	1467.62	-0.724968	25.8277	14251	14251	MS2	12/22	20130120_Brassica_A3.raw
	High	LEGDRESTLGFVDLLR	Unambiguous	1	1	Bra028087		HCD	1	0	1	1	356	3.20764	0	1	60.4009	40	3	607.322	1819.95	-1.68899	43.2153	24138	24138	MS2	18/60	20130120_Brassica_A5.raw
	High	VTPQPGVPPEEAGAAVAAESSTGTWTTVWTDGLTSLDR	Unambiguous	1	1	Bra028087		HCD	1	0	1	1	396	3.20432	0	0	0	50	3	1285.63	3854.88	3.33903	55.843	31197	31197	MS2	25/148	20130120_Brassica_A4.raw
	High	ESTLGFVDLLRDDYVEK	Unambiguous	1	1	Bra028087		HCD	1	0	1	1	373	3.20085	0	1	0.233257	4	3	667.005	1999	-0.195732	45.101	25313	25313	MS2	23/64	20130120_Brassica_A3.raw
	High	EITFNFPTIDKLDGQD	Unambiguous	1	1	Bra028087		HCD	1	0	1	1	291	3.20041	0	1	0.452571	19	2	926.952	1852.9	0.257372	46.7176	26086	26086	MS2	14/30	20130120_Brassica_A6.raw
	High	LSGGDHVHAGTVVGK	Unambiguous	1	1	Bra028087		HCD	1	0	1	1	376	3.20038	0	0	3.01622	50	3	478.588	1433.75	0.0325311	21.4383	11750	11750	MS2	24/56	20130120_Brassica_A4.raw
	High	GGLDFTKDDENVNSQPFmR	Unambiguous	2	2	Bra028087 ;Bra041116	M18(Oxidation)	HCD	1	0	1	1	247	3.19271	0	1	12.3552	50	3	729.332	2185.98	-0.455226	34.8366	19490	19490	MS2	25/72	20130120_Brassica_A3.raw
	High	ESTLGFVDLLRDDYVEKDR	Unambiguous	1	1	Bra028087		HCD	1	0	1	1	421	3.19197	0	2	2.55968	50	3	757.382	2270.13	1.13703	43.5504	24319	24319	MS2	24/72	20130120_Brassica_A4.raw
	High	GHYLNATAGTcEEmmKR	Unambiguous	1	1	Bra028087	C11(Carbamidomethyl); M14(Oxidation); M15(Oxidation)	HCD	1	0	1	1	143	3.18958	0	1	17.6108	28	4	500.97	2000.86	-1.25012	22.9069	12576	12576	MS2	24/96	20130120_Brassica_A3.raw
	High	LEGDRESTLGFVDLLR	Unambiguous	1	1	Bra028087		HCD	1	0	1	1	366	3.18938	0	1	19.5589	29	3	607.323	1819.96	0.423817	42.9422	23984	23984	MS2	18/60	20130120_Brassica_A5.raw
	High	GGLDFTKDDENVNSQPFmR	Unambiguous	2	2	Bra028087 ;Bra041116	M18(Oxidation)	HCD	1	0	1	1	307	3.18927	0	1	16.0655	50	3	729.336	2185.99	5.07314	91.7026	51303	51303	MS2	21/72	20130120_Brassica_A2.raw
	High	LSGGDHVHAGTVVGK	Unambiguous	1	1	Bra028087		HCD	1	0	1	1	379	3.18819	0	0	1.17061	50	3	478.587	1433.75	-1.24458	21.5543	11809	11809	MS2	23/56	20130120_Brassica_A3.raw
	High	LEGDRESTLGFVDLLR	Unambiguous	1	1	Bra028087		HCD	1	0	1	1	349	3.18495	0	1	29.8921	21	3	607.323	1819.95	-0.179842	43.3723	24186	24186	MS2	16/60	20130120_Brassica_A2.raw
	High	VTPQPGVPPEEAGAAVAAESSTGTWTTVWTDGLTSLDR	Unambiguous	1	1	Bra028087		HCD	1	0	1	1	426	3.17724	0	0	20.8483	50	4	964.472	3854.86	-1.87359	92.047	51662	51662	MS2	40/222	20130120_Brassica_A3.raw
	High	VTPQPGVPPEEAGAAVAAESSTGTWTTVWTDGLTSLDR	Unambiguous	1	1	Bra028087		HCD	1	0	1	1	449	3.17095	0	0	1.56189	50	4	964.475	3854.88	1.29306	64.2453	36030	36030	MS2	40/222	20130120_Brassica_A3.raw
	High	VTPQPGVPPEEAGAAVAAESSTGTWTTVWTDGLTSLDR	Unambiguous	1	1	Bra028087		HCD	1	0	1	1	302	3.16582	0	0	0	50	2	1927.94	3854.86	-2.08828	64.5463	36199	36199	MS2	19/74	20130120_Brassica_A3.raw
	High	TFQGPPHGIQVER	Unambiguous	2	2	Bra028087 ;Bra041116		HCD	1	0	1	1	380	3.16498	0	0	0.343439	1	3	489.256	1465.75	-0.519117	28.136	15572	15572	MS2	24/48	20130120_Brassica_A1.raw
	High	GGLDFTKDDENVNSQPFmR	Unambiguous	2	2	Bra028087 ;Bra041116	M18(Oxidation)	HCD	1	0	1	1	252	3.16392	0	1	29.8798	11	3	729.332	2185.98	-0.371463	33.1485	18457	18457	MS2	19/72	20130120_Brassica_A1.raw
	High	GHYLNATAGTcEEmmKR	Unambiguous	1	1	Bra028087	C11(Carbamidomethyl); M14(Oxidation); M15(Oxidation)	HCD	1	0	1	1	145	3.16303	0	1	5.24556	8	4	500.971	2000.86	-0.823056	22.5951	12397	12397	MS2	22/96	20130120_Brassica_A3.raw
	High	LNYYTPEYETK	Unambiguous	1	1	Bra028087		HCD	1	0	1	1	215	3.15827	0	0	0	50	1	1420.66	1420.66	1.27807	31.2101	17299	17299	MS2	14/20	20130120_Brassica_A2.raw
	High	VTPQPGVPPEEAGAAVAAESSTGTWTTVWTDGLTSLDR	Unambiguous	1	1	Bra028087		HCD	1	0	1	1	427	3.154	0	0	13.5654	50	4	964.473	3854.87	-0.796924	92.3218	51815	51815	MS2	41/222	20130120_Brassica_A3.raw
	High	TFQGPPHGIQVER	Unambiguous	2	2	Bra028087 ;Bra041116		HCD	1	0	1	1	365	3.14753	0	0	2.94264	7	2	733.381	1465.76	0.239591	28.6284	15860	15860	MS2	19/24	20130120_Brassica_A1.raw
	High	LEGDRESTLGFVDLLR	Unambiguous	1	1	Bra028087		HCD	1	0	1	1	358	3.14547	0	1	3.81143	50	3	607.324	1819.96	0.625037	94.4804	53008	53008	MS2	17/60	20130120_Brassica_A3.raw
	High	FLFcAEAIYK	Unambiguous	1	1	Bra028087	C4(Carbamidomethyl)	HCD	1	0	1	1	359	3.14446	0	0	0	50	1	1261.63	1261.63	2.65745	41.9421	23380	23380	MS2	16/18	20130120_Brassica_A2.raw
	High	LEGDRESTLGFVDLLR	Unambiguous	1	1	Bra028087		HCD	1	0	1	1	248	3.14394	0	1	1.44689	3	2	910.481	1819.95	-0.239527	42.9879	24032	24032	MS2	17/30	20130120_Brassica_A1.raw
	High	GGLDFTKDDENVNSQPFmR	Unambiguous	2	2	Bra028087 ;Bra041116	M18(Oxidation)	HCD	1	0	1	1	215	3.14129	0	1	0	50	2	1093.5	2185.98	0.779455	33.6155	18668	18668	MS2	18/36	20130120_Brassica_A2.raw
	High	TFQGPPHGIQVER	Unambiguous	2	2	Bra028087 ;Bra041116		HCD	1	0	1	1	365	3.14028	0	0	0	12	3	489.254	1465.75	-3.9545	28.5619	15783	15783	MS2	26/48	20130120_Brassica_A6.raw
	High	ALAALRLEDLRIPPAYTK	Unambiguous	1	1	Bra028087		HCD	1	0	1	1	65	3.13984	0	2	19.5236	50	3	671.061	2011.17	-0.0682901	39.7477	22275	22275	MS2	22/68	20130120_Brassica_A3.raw
	High	ESTLGFVDLLRDDYVEKDR	Unambiguous	1	1	Bra028087		HCD	1	0	1	1	429	3.1389	0	2	35.6244	50	4	568.292	2270.14	6.45453	91.7339	51374	51374	MS2	25/108	20130120_Brassica_A1.raw
	High	VTPQPGVPPEEAGAAVAAESSTGTWTTVWTDGLTSLDR	Unambiguous	1	1	Bra028087		HCD	1	0	1	1	439	3.13734	0	0	0	50	4	964.47	3854.86	-3.90026	60.3617	33841	33841	MS2	36/222	20130120_Brassica_A3.raw
	High	DLAVEGNEIIR	Unambiguous	1	1	Bra028087		HCD	1	0	1	1	177	3.13692	0	0	15.9705	14	2	614.829	1228.65	-1.30417	33.9976	18887	18887	MS2	14/20	20130120_Brassica_A2.raw
	High	EITFNFPTIDKLDGQD	Unambiguous	1	1	Bra028087		HCD	1	0	1	1	311	3.13579	0	1	5.55256	50	2	926.954	1852.9	2.69496	47.3491	26413	26413	MS2	14/30	20130120_Brassica_A2.raw
	High	DDENVNSQPFmR	Unambiguous	2	2	Bra028087 ;Bra041116	M11(Oxidation)	HCD	1	0	1	1	63	3.13252	0	0	0	39	2	734.311	1467.61	-1.80626	26.6525	14717	14717	MS2	13/22	20130120_Brassica_A1.raw
	High	GGLDFTKDDENVNSQPFmR	Unambiguous	2	2	Bra028087 ;Bra041116	M18(Oxidation)	HCD	1	0	1	1	252	3.12549	0	1	0	1	3	729.331	2185.98	-1.04157	34.1894	18997	18997	MS2	21/72	20130120_Brassica_A2.raw
	High	LEGDRESTLGFVDLLR	Unambiguous	1	1	Bra028087		HCD	1	0	1	1	356	3.12039	0	1	7.41673	50	3	607.324	1819.96	1.2287	92.2957	51631	51631	MS2	21/60	20130120_Brassica_A2.raw
	High	TFQGPPHGIQVER	Unambiguous	2	2	Bra028087 ;Bra041116		HCD	1	0	1	1	365	3.11625	0	0	0.297794	0	3	489.256	1465.75	-0.269272	27.8106	15415	15415	MS2	23/48	20130120_Brassica_A3.raw
	High	LNYYTPEYETK	Unambiguous	1	1	Bra028087		HCD	1	0	1	1	229	3.11623	0	0	0	50	1	1420.66	1420.66	0.934366	31.1431	17362	17362	MS2	15/20	20130120_Brassica_A3.raw
	High	LSGGDHVHAGTVVGK	Unambiguous	1	1	Bra028087		HCD	1	0	1	1	380	3.11567	0	0	70.1527	50	3	478.587	1433.75	-1.94699	21.5107	11776	11776	MS2	25/56	20130120_Brassica_A2.raw
	High	WSPELAAAcEVWK	Unambiguous	2	2	Bra028087 ;Bra041116	C9(Carbamidomethyl)	HCD	1	0	1	1	267	3.11413	0	0	16.3709	50	2	773.871	1546.73	-0.833084	42.4795	23683	23683	MS2	14/24	20130120_Brassica_A2.raw
	High	LNYYTPEYETK	Unambiguous	1	1	Bra028087		HCD	1	0	1	1	213	3.11392	0	0	20.538	13	2	710.835	1420.66	-0.235084	31.1071	17265	17265	MS2	13/20	20130120_Brassica_A5.raw
	High	GGLDFTKDDENVNSQPFmR	Unambiguous	2	2	Bra028087 ;Bra041116	M18(Oxidation)	HCD	1	0	1	1	261	3.11219	0	1	0.355522	1	3	729.332	2185.98	0.298645	33.9775	18901	18901	MS2	19/72	20130120_Brassica_A4.raw
	High	ESTLGFVDLLR	Unambiguous	1	1	Bra028087		HCD	1	0	1	1	296	3.11087	0	0	3.91024	5	2	625.343	1249.68	-0.376933	45.7513	25520	25520	MS2	13/20	20130120_Brassica_A2.raw
	High	DRFLFcAEAIYK	Unambiguous	1	1	Bra028087	C6(Carbamidomethyl)	HCD	1	0	1	1	325	3.11074	0	1	2.03619	5	2	766.883	1532.76	1.48975	39.0745	21895	21895	MS2	15/22	20130120_Brassica_A3.raw
	High	EITFNFPTIDKLDGQD	Unambiguous	1	1	Bra028087		HCD	1	0	1	1	270	3.11044	0	1	0.164755	1	2	926.951	1852.9	-0.533197	46.8363	26125	26125	MS2	15/30	20130120_Brassica_A2.raw
	High	VTPQPGVPPEEAGAAVAAESSTGTWTTVWTDGLTSLDR	Unambiguous	1	1	Bra028087		HCD	1	0	1	1	427	3.10324	0	0	1.67562	50	4	964.473	3854.87	-0.923591	71.3435	40028	40028	MS2	42/222	20130120_Brassica_A3.raw
	High	EITFNFPTIDKLDGQD	Unambiguous	1	1	Bra028087		HCD	1	0	1	1	326	3.09871	0	1	53.8096	50	2	926.951	1852.89	-1.19201	46.7754	26140	26140	MS2	15/30	20130120_Brassica_A5.raw
	High	LEGDRESTLGFVDLLRDDYVEK	Unambiguous	1	1	Bra028087		HCD	1	0	1	1	452	3.09819	0	2	20.0365	50	3	857.099	2569.28	1.59555	91.615	51421	51421	MS2	21/84	20130120_Brassica_A3.raw
	High	EITFNFPTIDKLDGQD	Unambiguous	1	1	Bra028087		HCD	1	0	1	1	313	3.09705	0	1	0	50	2	926.951	1852.89	-1.06024	44.8094	25148	25148	MS2	15/30	20130120_Brassica_A3.raw
	High	DNGLLLHIHR	Unambiguous	2	2	Bra028087 ;Bra041116		HCD	1	0	1	1	314	3.09705	0	0	1.08309	1	2	594.336	1187.66	0.0547374	28.4521	15793	15793	MS2	14/18	20130120_Brassica_A3.raw
	High	ESTLGFVDLLRDDYVEKDR	Unambiguous	1	1	Bra028087		HCD	1	0	1	1	444	3.09321	0	2	11.4554	25	3	757.383	2270.13	2.02427	43.6096	24319	24319	MS2	24/72	20130120_Brassica_A2.raw
	High	LNYYTPEYETKDTDILAAFR	Unambiguous	1	1	Bra028087		HCD	1	0	1	1	302	3.09232	0	1	0	50	2	1212.09	2423.18	1.29326	43.0657	24167	24167	MS2	15/38	20130120_Brassica_A3.raw
	High	VTPQPGVPPEEAGAAVAAESSTGTWTTVWTDGLTSLDR	Unambiguous	1	1	Bra028087		HCD	1	0	1	1	448	3.08794	0	0	12.7843	50	4	964.475	3854.88	1.41973	66.3265	37205	37205	MS2	41/222	20130120_Brassica_A3.raw
	High	TFQGPPHGIQVER	Unambiguous	2	2	Bra028087 ;Bra041116		HCD	1	0	1	1	368	3.08757	0	0	2.648	50	3	489.258	1465.76	2.6664	91.6546	51442	51442	MS2	26/48	20130120_Brassica_A3.raw
	High	LNYYTPEYETK	Unambiguous	1	1	Bra028087		HCD	1	0	1	1	209	3.08728	0	0	5.26975	5	1	1420.66	1420.66	-0.955981	31.2739	17381	17381	MS2	14/20	20130120_Brassica_A1.raw
	High	GHYLNATAGTcEEmmKR	Unambiguous	1	1	Bra028087	C11(Carbamidomethyl); M14(Oxidation); M15(Oxidation)	HCD	1	0	1	1	146	3.08701	0	1	0	50	2	1000.93	2000.86	-0.199526	22.8398	12537	12537	MS2	16/32	20130120_Brassica_A3.raw
	High	LNYYTPEYETK	Unambiguous	1	1	Bra028087		HCD	1	0	1	1	212	3.0854	0	0	3.78669	5	1	1420.66	1420.66	-0.612281	31.4727	17449	17449	MS2	15/20	20130120_Brassica_A2.raw
	High	TFQGPPHGIQVER	Unambiguous	2	2	Bra028087 ;Bra041116		HCD	1	0	1	1	352	3.08294	0	0	20.0905	36	2	733.377	1465.75	-5.75671	29.5508	16437	16437	MS2	19/24	20130120_Brassica_A3.raw
	High	VTPQPGVPPEEAGAAVAAESSTGTWTTVWTDGLTSLDR	Unambiguous	1	1	Bra028087		HCD	1	0	1	1	439	3.08282	0	0	2.92099	50	4	964.475	3854.88	1.67306	64.9407	36421	36421	MS2	39/222	20130120_Brassica_A3.raw
	High	DLAVEGNEIIR	Unambiguous	1	1	Bra028087		HCD	1	0	1	1	207	3.07723	0	0	13.3939	50	2	614.832	1228.66	2.66994	91.4692	51173	51173	MS2	14/20	20130120_Brassica_A2.raw
	High	LEDLRIPPAYTK	Unambiguous	1	1	Bra028087		HCD	1	0	1	1	271	3.07705	0	1	45.4837	50	2	708.399	1415.79	0.864282	32.4761	18021	18021	MS2	14/22	20130120_Brassica_A2.raw
	High	VTPQPGVPPEEAGAAVAAESSTGTWTTVWTDGLTSLDR	Unambiguous	1	1	Bra028087		HCD	1	0	1	1	438	3.07612	0	0	0	50	4	964.47	3854.86	-3.71026	58.4653	32778	32778	MS2	44/222	20130120_Brassica_A3.raw
	High	LEGDRESTLGFVDLLR	Unambiguous	1	1	Bra028087		HCD	1	0	1	1	364	3.07442	0	1	11.5341	50	3	607.324	1819.96	0.826256	43.7872	24482	24482	MS2	17/60	20130120_Brassica_A1.raw
	High	GGLDFTKDDENVNSQPFmR	Unambiguous	2	2	Bra028087 ;Bra041116	M18(Oxidation)	HCD	1	0	1	1	214	3.07384	0	1	16.4948	50	2	1093.5	2185.99	1.56125	34.4451	19199	19199	MS2	17/36	20130120_Brassica_A1.raw
	High	GHYLNATAGTcEEmmKR	Unambiguous	1	1	Bra028087	C11(Carbamidomethyl); M14(Oxidation); M15(Oxidation)	HCD	1	0	1	1	143	3.07073	0	1	0	50	2	1000.94	2000.86	0.593588	22.8846	12547	12547	MS2	16/32	20130120_Brassica_A2.raw
	High	DDENVNSQPFmR	Unambiguous	2	2	Bra028087 ;Bra041116	M11(Oxidation)	HCD	1	0	1	1	71	3.07008	0	0	6.67321	26	2	734.313	1467.62	1.60395	26.6372	14727	14727	MS2	13/22	20130120_Brassica_A3.raw
	High	LNYYTPEYETK	Unambiguous	1	1	Bra028087		HCD	1	0	1	1	239	3.06874	0	0	73.9017	43	2	710.836	1420.66	1.31156	91.6964	51467	51467	MS2	11/20	20130120_Brassica_A3.raw
	High	DNGLLLHIHR	Unambiguous	2	2	Bra028087 ;Bra041116		HCD	1	0	1	1	304	3.06642	0	0	25.4856	50	3	396.56	1187.67	1.71362	29.7117	16370	16370	MS2	19/36	20130120_Brassica_A7.raw
	High	TFQGPPHGIQVER	Unambiguous	2	2	Bra028087 ;Bra041116		HCD	1	0	1	1	380	3.06278	0	0	0.549618	0	3	489.256	1465.75	0.0430338	28.0709	15569	15569	MS2	25/48	20130120_Brassica_A3.raw
	High	VTPQPGVPPEEAGAAVAAESSTGTWTTVWTDGLTSLDR	Unambiguous	1	1	Bra028087		HCD	1	0	1	1	428	3.06169	0	0	0	50	4	964.473	3854.87	-0.543592	63.9722	35875	35875	MS2	38/222	20130120_Brassica_A3.raw
	High	LEGDRESTLGFVDLLR	Unambiguous	1	1	Bra028087		HCD	1	0	1	1	356	3.06139	0	1	0.116248	0	3	607.324	1819.96	1.12809	42.0009	23561	23561	MS2	16/60	20130120_Brassica_A3.raw
	High	GGLDFTKDDENVNSQPFmR	Unambiguous	2	2	Bra028087 ;Bra041116	M18(Oxidation)	HCD	1	0	1	1	253	3.05965	0	1	0	50	3	729.332	2185.98	-0.287699	93.4875	52459	52459	MS2	21/72	20130120_Brassica_A3.raw
	High	LGLSAKNYGR	Unambiguous	2	2	Bra028087 ;Bra041116		HCD	1	0	1	1	186	3.05929	0	1	28.9211	50	3	360.205	1078.6	-0.344005	25.0082	13778	13778	MS2	17/36	20130120_Brassica_A3.raw
	High	VTPQPGVPPEEAGAAVAAESSTGTWTTVWTDGLTSLDR	Unambiguous	1	1	Bra028087		HCD	1	0	1	1	438	3.05772	0	0	0	50	3	1285.63	3854.88	1.34405	61.869	34578	34578	MS2	23/148	20130120_Brassica_A4.raw
	High	LEGDRESTLGFVDLLR	Unambiguous	1	1	Bra028087		HCD	1	0	1	1	330	3.05754	0	1	38.2048	50	2	910.487	1819.97	6.80312	91.7203	51479	51479	MS2	18/30	20130120_Brassica_A3.raw
	High	VTPQPGVPPEEAGAAVAAESSTGTWTTVWTDGLTSLDR	Unambiguous	1	1	Bra028087		HCD	1	0	1	1	419	3.04728	0	0	0	50	3	1285.63	3854.88	0.774056	60.4992	33806	33806	MS2	22/148	20130120_Brassica_A4.raw
	High	VTPQPGVPPEEAGAAVAAESSTGTWTTVWTDGLTSLDR	Unambiguous	1	1	Bra028087		HCD	1	0	1	1	427	3.04637	0	0	0	50	4	964.473	3854.87	-0.860258	61.7573	34626	34626	MS2	39/222	20130120_Brassica_A3.raw
	High	DNGLLLHIHR	Unambiguous	2	2	Bra028087 ;Bra041116		HCD	1	0	1	1	295	3.04578	0	0	0	50	1	1187.67	1187.67	1.45361	28.4869	15814	15814	MS2	12/18	20130120_Brassica_A3.raw
	High	LEGDRESTLGFVDLLRDDYVEK	Unambiguous	1	1	Bra028087		HCD	1	0	1	1	447	3.04434	0	2	2.11669	10	4	643.076	2569.28	0.877644	44.152	24623	24623	MS2	22/126	20130120_Brassica_A2.raw
	High	VTPQPGVPPEEAGAAVAAESSTGTWTTVWTDGLTSLDR	Unambiguous	1	1	Bra028087		HCD	1	0	1	1	426	3.04293	0	0	67.3764	50	3	1285.63	3854.88	1.72405	59.8945	33468	33468	MS2	23/148	20130120_Brassica_A4.raw
	High	LEDLRIPPAYTK	Unambiguous	1	1	Bra028087		HCD	1	0	1	1	275	3.04032	0	1	4.97502	13	3	472.602	1415.79	0.682344	32.2973	17940	17940	MS2	20/44	20130120_Brassica_A4.raw
	High	ESTLGFVDLLR	Unambiguous	1	1	Bra028087		HCD	1	0	1	1	299	3.03142	0	0	0.449898	5	2	625.342	1249.68	-0.86534	45.671	25475	25475	MS2	12/20	20130120_Brassica_A2.raw
	High	EITFNFPTIDKLDGQD	Unambiguous	1	1	Bra028087		HCD	1	0	1	1	319	3.03021	0	1	9.98199	50	2	926.952	1852.9	-0.137912	47.301	26454	26454	MS2	13/30	20130120_Brassica_A1.raw
	High	DTDILAAFR	Unambiguous	1	1	Bra028087		HCD	1	0	1	1	274	3.02683	0	0	2.83569	8	1	1021.53	1021.53	0.328875	40.5556	22659	22659	MS2	15/16	20130120_Brassica_A1.raw
	High	VTPQPGVPPEEAGAAVAAESSTGTWTTVWTDGLTSLDR	Unambiguous	1	1	Bra028087		HCD	1	0	1	1	426	3.02269	0	0	67.6185	50	4	964.473	3854.87	-0.676947	61.1582	34288	34288	MS2	42/222	20130120_Brassica_A3.raw
	High	DLAVEGNEIIR	Unambiguous	1	1	Bra028087		HCD	1	0	1	1	208	3.01849	0	0	21.701	50	2	614.832	1228.66	2.76929	91.4441	51214	51214	MS2	13/20	20130120_Brassica_A1.raw
	High	LNYYTPEYETK	Unambiguous	1	1	Bra028087		HCD	1	0	1	1	205	3.01768	0	0	0	50	1	1420.66	1420.66	-0.268581	31.1354	17275	17275	MS2	16/20	20130120_Brassica_A4.raw
	High	VTPQPGVPPEEAGAAVAAESSTGTWTTVWTDGLTSLDR	Unambiguous	1	1	Bra028087		HCD	1	0	1	1	433	3.01407	0	0	0	50	3	1285.63	3854.89	4.28902	91.5103	51251	51251	MS2	24/148	20130120_Brassica_A1.raw
	High	ELGVPIVMHDYLTGGFTANTSLAHYcR	Unambiguous	1	1	Bra028087	C26(Carbamidomethyl)	HCD	1	0	1	1	464	3.0119	0	0	30.7941	22	3	1008.16	3022.46	2.0687	44.6613	25063	25063	MS2	25/104	20130120_Brassica_A3.raw
	High	EITFNFPTIDKLDGQD	Unambiguous	1	1	Bra028087		HCD	1	0	1	1	284	3.01169	0	1	5.31615	29	2	926.952	1852.9	0.586776	46.3173	25868	25868	MS2	14/30	20130120_Brassica_A4.raw
	High	LEGDRESTLGFVDLLR	Unambiguous	1	1	Bra028087		HCD	1	0	1	1	363	3.01154	0	1	8.26657	50	3	607.324	1819.96	1.3293	92.5567	51775	51775	MS2	18/60	20130120_Brassica_A2.raw
	High	TFQGPPHGIQVER	Unambiguous	2	2	Bra028087 ;Bra041116		HCD	1	0	1	1	384	3.01016	0	0	25.4595	7	3	489.256	1465.75	-0.831423	29.0051	16078	16078	MS2	26/48	20130120_Brassica_A1.raw
	High	VTPQPGVPPEEAGAAVAAESSTGTWTTVWTDGLTSLDR	Unambiguous	1	1	Bra028087		HCD	1	0	1	1	428	3.00227	0	0	0	50	4	964.472	3854.87	-1.24026	68.9556	38684	38684	MS2	36/222	20130120_Brassica_A3.raw
	High	LNYYTPEYETK	Unambiguous	1	1	Bra028087		HCD	1	0	1	1	236	3.00055	0	0	14.3062	50	2	710.839	1420.67	5.09223	91.647	51271	51271	MS2	11/20	20130120_Brassica_A2.raw
	High	TFQGPPHGIQVER	Unambiguous	2	2	Bra028087 ;Bra041116		HCD	1	0	1	1	376	2.99943	0	0	34.7542	28	3	489.256	1465.75	-1.39357	29.7172	16533	16533	MS2	24/48	20130120_Brassica_A3.raw
	High	TFQGPPHGIQVER	Unambiguous	2	2	Bra028087 ;Bra041116		HCD	1	0	1	1	379	2.99546	0	0	0.420989	0	3	489.256	1465.75	-0.0194274	28.5291	15766	15766	MS2	26/48	20130120_Brassica_A2.raw
	High	DLAVEGNEIIR	Unambiguous	1	1	Bra028087		HCD	1	0	1	1	175	2.99391	0	0	0	50	1	1228.65	1228.65	0.544803	33.9986	18914	18914	MS2	16/20	20130120_Brassica_A4.raw
	High	LEGDRESTLGFVDLLRDDYVEK	Unambiguous	1	1	Bra028087		HCD	1	0	1	1	469	2.98991	0	2	0	50	3	857.097	2569.28	-0.4712	44.1965	24713	24713	MS2	23/84	20130120_Brassica_A1.raw
	High	ESTLGFVDLLR	Unambiguous	1	1	Bra028087		HCD	1	0	1	1	322	2.98961	0	0	39.6178	50	2	625.342	1249.68	-0.86534	91.9634	51615	51615	MS2	12/20	20130120_Brassica_A3.raw
	High	VTPQPGVPPEEAGAAVAAESSTGTWTTVWTDGLTSLDR	Unambiguous	1	1	Bra028087		HCD	1	0	1	1	442	2.98528	0	0	1.86858	50	4	964.474	3854.87	0.0264052	67.1596	37675	37675	MS2	38/222	20130120_Brassica_A3.raw
	High	GHYLNATAGTcEEmmKR	Unambiguous	1	1	Bra028087	C11(Carbamidomethyl); M14(Oxidation); M15(Oxidation)	HCD	1	0	1	1	149	2.98434	0	1	26.5092	50	3	667.626	2000.86	-0.0537245	22.8567	12532	12532	MS2	22/64	20130120_Brassica_A2.raw
	High	DRFLFcAEAIYK	Unambiguous	1	1	Bra028087	C6(Carbamidomethyl)	HCD	1	0	1	1	319	2.98422	0	1	17.806	26	3	511.59	1532.76	0.146995	38.9971	21852	21852	MS2	20/44	20130120_Brassica_A3.raw
	High	VTPQPGVPPEEAGAAVAAESSTGTWTTVWTDGLTSLDR	Unambiguous	1	1	Bra028087		HCD	1	0	1	1	420	2.98345	0	0	0	50	3	1285.63	3854.88	2.29404	57.1664	31937	31937	MS2	23/148	20130120_Brassica_A4.raw
	High	LEGDRESTLGFVDLLR	Unambiguous	1	1	Bra028087		HCD	1	0	1	1	286	2.97787	0	1	35.4215	50	2	910.485	1819.96	4.12022	42.9389	23975	23975	MS2	20/30	20130120_Brassica_A4.raw
	High	GGLDFTKDDENVNSQPFMR	Unambiguous	2	2	Bra028087 ;Bra041116		HCD	1	0	1	1	268	2.97495	0	1	46.3373	50	3	723.999	2169.98	-2.60503	36.1481	20232	20232	MS2	23/72	20130120_Brassica_A3.raw
	High	DLAVEGNEIIR	Unambiguous	1	1	Bra028087		HCD	1	0	1	1	181	2.97404	0	0	0	50	1	1228.66	1228.66	2.82991	34.1205	18969	18969	MS2	14/20	20130120_Brassica_A6.raw
	High	WSPELAAAcEVWK	Unambiguous	2	2	Bra028087 ;Bra041116	C9(Carbamidomethyl)	HCD	1	0	1	1	258	2.96264	0	0	3.08012	17	2	773.871	1546.73	-0.833084	42.3329	23638	23638	MS2	16/24	20130120_Brassica_A5.raw
	High	EITFNFPTIDK	Unambiguous	1	1	Bra028087		HCD	1	0	1	1	307	2.96081	0	0	15.5205	43	2	662.842	1324.68	-0.928285	42.8705	23903	23903	MS2	13/20	20130120_Brassica_A2.raw
	High	ESTLGFVDLLRDDYVEK	Unambiguous	1	1	Bra028087		HCD	1	0	1	1	379	2.95899	0	1	1.30132	23	3	667.006	1999	0.445457	45.5503	25472	25472	MS2	23/64	20130120_Brassica_A1.raw
	High	EITFNFPTIDKLDGQD	Unambiguous	1	1	Bra028087		HCD	1	0	1	1	287	2.95747	0	1	0.147534	1	2	926.951	1852.89	-1.19201	46.5291	26021	26021	MS2	14/30	20130120_Brassica_A1.raw
	High	DNGLLLHIHR	Unambiguous	2	2	Bra028087 ;Bra041116		HCD	1	0	1	1	287	2.95701	0	0	42.089	14	3	396.559	1187.66	-1.90944	28.8838	16045	16045	MS2	18/36	20130120_Brassica_A3.raw
	High	DLAVEGNEIIR	Unambiguous	1	1	Bra028087		HCD	1	0	1	1	190	2.9569	0	0	0.70416	15	2	614.83	1228.65	-0.211288	92.1223	51703	51703	MS2	13/20	20130120_Brassica_A3.raw
	High	TFQGPPHGIQVER	Unambiguous	2	2	Bra028087 ;Bra041116		HCD	1	0	1	1	344	2.95455	0	0	0.866593	1	2	733.38	1465.75	-1.1762	28.5135	15757	15757	MS2	19/24	20130120_Brassica_A2.raw
	High	ESTLGFVDLLR	Unambiguous	1	1	Bra028087		HCD	1	0	1	1	306	2.94554	0	0	19.3937	50	2	625.343	1249.68	-0.279252	45.4781	25366	25366	MS2	13/20	20130120_Brassica_A2.raw
	High	DRFLFcAEAIYK	Unambiguous	1	1	Bra028087	C6(Carbamidomethyl)	HCD	1	0	1	1	284	2.94367	0	1	8.28159	18	2	766.883	1532.76	0.852626	39.4043	22008	22008	MS2	14/22	20130120_Brassica_A1.raw
	High	TFQGPPHGIQVER	Unambiguous	2	2	Bra028087 ;Bra041116		HCD	1	0	1	1	338	2.94229	0	0	7.39116	2	2	733.38	1465.75	-0.759788	28.299	15650	15650	MS2	20/24	20130120_Brassica_A5.raw
	High	WSPELAAAcEVWK	Unambiguous	2	2	Bra028087 ;Bra041116	C9(Carbamidomethyl)	HCD	1	0	1	1	204	2.94161	0	0	0	50	1	1546.74	1546.74	2.29299	42.3928	23671	23671	MS2	16/24	20130120_Brassica_A5.raw
	High	GGLDFTKDDENVNSQPFmR	Unambiguous	2	2	Bra028087 ;Bra041116	M18(Oxidation)	HCD	1	0	1	1	265	2.94128	0	1	43.673	50	3	729.333	2185.99	1.80638	35.2066	19575	19575	MS2	19/72	20130120_Brassica_A2.raw
	High	DTDILAAFR	Unambiguous	1	1	Bra028087		HCD	1	0	1	1	335	2.9404	0	0	0	34	1	1021.53	1021.53	1.04586	86.8886	48769	48769	MS2	15/16	20130120_Brassica_A3.raw
	High	DRFLFcAEAIYK	Unambiguous	1	1	Bra028087	C6(Carbamidomethyl)	HCD	1	0	1	1	341	2.94005	0	1	3.82176	50	3	511.59	1532.76	-0.0321974	39.4854	22054	22054	MS2	21/44	20130120_Brassica_A1.raw
	High	WSPELAAAcEVWK	Unambiguous	2	2	Bra028087 ;Bra041116	C9(Carbamidomethyl)	HCD	1	0	1	1	254	2.93964	0	0	0	50	2	773.873	1546.74	1.21887	42.5671	23765	23765	MS2	14/24	20130120_Brassica_A4.raw
	High	LEDLRIPPAYTK	Unambiguous	1	1	Bra028087		HCD	1	0	1	1	276	2.93668	0	1	6.40235	6	2	708.399	1415.79	0.5194	31.9106	17801	17801	MS2	17/22	20130120_Brassica_A3.raw
	High	EITFNFPTIDK	Unambiguous	1	1	Bra028087		HCD	1	0	1	1	295	2.93643	0	0	0	50	1	1324.68	1324.68	-0.687757	42.5073	23698	23698	MS2	15/20	20130120_Brassica_A2.raw
	High	LEGDRESTLGFVDLLR	Unambiguous	1	1	Bra028087		HCD	1	0	1	1	298	2.93447	0	1	0	50	2	910.483	1819.96	1.97389	42.9675	23974	23974	MS2	18/30	20130120_Brassica_A6.raw
	High	ESTLGFVDLLR	Unambiguous	1	1	Bra028087		HCD	1	0	1	1	293	2.93387	0	0	2.95804	44	2	625.343	1249.68	-0.572296	85.7341	48121	48121	MS2	12/20	20130120_Brassica_A3.raw
	High	ESTLGFVDLLR	Unambiguous	1	1	Bra028087		HCD	1	0	1	1	301	2.92558	0	0	9.14164	46	2	625.343	1249.68	-0.767659	87.6645	49205	49205	MS2	11/20	20130120_Brassica_A3.raw
	High	EITFNFPTIDKLDGQD	Unambiguous	1	1	Bra028087		HCD	1	0	1	1	288	2.92371	0	1	28.6419	50	2	926.951	1852.89	-0.862602	48.9551	27467	27467	MS2	14/30	20130120_Brassica_A3.raw
	High	ASVGFKAGVK	Unambiguous	2	2	Bra028087 ;Bra041116		HCD	1	0	1	1	138	2.92298	0	1	24.0444	50	3	321.859	963.561	-1.19502	22.9173	12581	12581	MS2	18/36	20130120_Brassica_A3.raw
	High	TFQGPPHGIQVER	Unambiguous	2	2	Bra028087 ;Bra041116		HCD	1	0	1	1	369	2.92263	0	0	0	1	3	489.256	1465.75	-0.394194	28.3381	15728	15728	MS2	25/48	20130120_Brassica_A3.raw
	High	LSGGDHVHAGTVVGK	Unambiguous	1	1	Bra028087		HCD	1	0	1	1	379	2.92116	0	0	31.368	50	3	478.588	1433.75	-1.05301	21.3428	11702	11702	MS2	23/56	20130120_Brassica_A5.raw
	High	LEGDRESTLGFVDLLR	Unambiguous	1	1	Bra028087		HCD	1	0	1	1	326	2.91902	0	1	0.0675837	0	3	607.323	1819.95	-0.984722	42.2694	23714	23714	MS2	15/60	20130120_Brassica_A3.raw
	High	ESTLGFVDLLR	Unambiguous	1	1	Bra028087		HCD	1	0	1	1	295	2.91823	0	0	8.64623	24	2	625.343	1249.68	0.111474	87.1168	48897	48897	MS2	12/20	20130120_Brassica_A3.raw
	High	DLAVEGNEIIR	Unambiguous	1	1	Bra028087		HCD	1	0	1	1	209	2.91412	0	0	5.43689	6	2	614.831	1228.65	0.484182	33.9959	18912	18912	MS2	14/20	20130120_Brassica_A4.raw
	High	TFQGPPHGIQVER	Unambiguous	2	2	Bra028087 ;Bra041116		HCD	1	0	1	1	380	2.91383	0	0	0.266785	0	3	489.256	1465.75	-0.519117	28.3997	15727	15727	MS2	24/48	20130120_Brassica_A1.raw
	High	DDENVNSQPFmR	Unambiguous	2	2	Bra028087 ;Bra041116	M11(Oxidation)	HCD	1	0	1	1	65	2.91336	0	0	31.7564	50	2	734.312	1467.62	-0.724968	26.8468	14799	14799	MS2	12/22	20130120_Brassica_A2.raw
	High	VTPQPGVPPEEAGAAVAAESSTGTWTTVWTDGLTSLDR	Unambiguous	1	1	Bra028087		HCD	1	0	1	1	392	2.91311	0	0	0	50	3	1285.62	3854.86	-3.50093	56.5266	31621	31621	MS2	21/148	20130120_Brassica_A1.raw
	High	DTDILAAFR	Unambiguous	1	1	Bra028087		HCD	1	0	1	1	270	2.91074	0	0	0	45	1	1021.53	1021.53	-0.328361	87.6605	49202	49202	MS2	15/16	20130120_Brassica_A3.raw
	High	LEDLRIPPAYTK	Unambiguous	1	1	Bra028087		HCD	1	0	1	1	276	2.90857	0	1	1.01242	2	3	472.602	1415.79	0.488347	31.8805	17784	17784	MS2	20/44	20130120_Brassica_A3.raw
	High	ESTLGFVDLLR	Unambiguous	1	1	Bra028087		HCD	1	0	1	1	314	2.9085	0	0	63.3072	49	2	625.344	1249.68	1.77205	91.6952	51466	51466	MS2	12/20	20130120_Brassica_A3.raw
	High	ESTLGFVDLLR	Unambiguous	1	1	Bra028087		HCD	1	0	1	1	285	2.90392	0	0	5.74043	42	2	625.343	1249.68	-0.767659	86.2662	48419	48419	MS2	12/20	20130120_Brassica_A3.raw
	High	ESTLGFVDLLRDDYVEKDR	Unambiguous	1	1	Bra028087		HCD	1	0	1	1	347	2.90261	0	2	0	50	2	1135.57	2270.13	-0.792851	43.5201	24311	24311	MS2	13/36	20130120_Brassica_A5.raw
	High	EITFNFPTIDKLDGQD	Unambiguous	1	1	Bra028087		HCD	1	0	1	1	305	2.90203	0	1	29.6072	2	2	926.952	1852.9	-0.203793	46.4967	25981	25981	MS2	14/30	20130120_Brassica_A5.raw
	High	EITFNFPTIDKLDGQD	Unambiguous	1	1	Bra028087		HCD	1	0	1	1	278	2.89961	0	1	0.0588467	0	2	926.951	1852.9	-0.73084	46.101	25873	25873	MS2	13/30	20130120_Brassica_A3.raw
	High	LSGGDHVHAGTVVGK	Unambiguous	1	1	Bra028087		HCD	1	0	1	1	382	2.89828	0	0	26.5748	50	3	478.589	1433.75	1.43735	22.4025	12288	12288	MS2	26/56	20130120_Brassica_A3.raw
	High	TFQGPPHGIQVER	Unambiguous	2	2	Bra028087 ;Bra041116		HCD	1	0	1	1	373	2.89726	0	0	4.2692	1	3	489.256	1465.75	-1.5185	28.6152	15824	15824	MS2	23/48	20130120_Brassica_A4.raw
	High	YGRPLLGcTIKPK	Unambiguous	2	2	Bra028087 ;Bra041116	C8(Carbamidomethyl)	HCD	1	0	1	1	237	2.89593	0	0	51.2895	23	2	751.926	1502.84	-4.38715	26.1798	14458	14458	MS2	15/24	20130120_Brassica_A3.raw
	High	GGLDFTKDDENVNSQPFmR	Unambiguous	2	2	Bra028087 ;Bra041116	M18(Oxidation)	HCD	1	0	1	1	261	2.89514	0	1	1.39778	50	3	729.333	2185.98	0.466172	92.2313	51595	51595	MS2	18/72	20130120_Brassica_A2.raw
	High	ESTLGFVDLLR	Unambiguous	1	1	Bra028087		HCD	1	0	1	1	285	2.89331	0	0	7.68689	18	2	625.342	1249.68	-1.45143	83.6312	46942	46942	MS2	12/20	20130120_Brassica_A3.raw
	High	GGLDFTKDDENVNSQPFmR	Unambiguous	2	2	Bra028087 ;Bra041116	M18(Oxidation)	HCD	1	0	1	1	228	2.88822	0	1	0	50	2	1093.5	2185.99	1.56125	35.2316	19713	19713	MS2	16/36	20130120_Brassica_A3.raw
	High	LEDLRIPPAYTK	Unambiguous	1	1	Bra028087		HCD	1	0	1	1	270	2.88048	0	1	11.9375	14	2	708.398	1415.79	-0.342807	32.503	18084	18084	MS2	15/22	20130120_Brassica_A1.raw
	High	DTDILAAFR	Unambiguous	1	1	Bra028087		HCD	1	0	1	1	362	2.87904	0	0	0	37	1	1021.53	1021.53	1.82259	40.7428	22744	22744	MS2	15/16	20130120_Brassica_A5.raw
	High	DNGLLLHIHR	Unambiguous	2	2	Bra028087 ;Bra041116		HCD	1	0	1	1	338	2.87697	0	0	0.0924237	0	3	396.56	1187.66	-0.213539	28.3676	15745	15745	MS2	19/36	20130120_Brassica_A3.raw
	High	DDENVNSQPFMR	Unambiguous	2	2	Bra028087 ;Bra041116		HCD	1	0	1	1	98	2.87355	0	0	43.1474	25	2	726.313	1451.62	-2.13363	29.8644	16531	16531	MS2	13/22	20130120_Brassica_A2.raw
	High	GGLDFTKDDENVNSQPFmR	Unambiguous	2	2	Bra028087 ;Bra041116	M18(Oxidation)	HCD	1	0	1	1	257	2.87203	0	1	0.614803	0	3	729.333	2185.98	0.968752	33.9259	18844	18844	MS2	21/72	20130120_Brassica_A2.raw
	High	FLFcAEAIYK	Unambiguous	1	1	Bra028087	C4(Carbamidomethyl)	HCD	1	0	1	1	349	2.86707	0	0	0	46	1	1261.63	1261.63	-2.27712	41.4431	23245	23245	MS2	16/18	20130120_Brassica_A3.raw
	High	EITFNFPTIDKLDGQD	Unambiguous	1	1	Bra028087		HCD	1	0	1	1	285	2.86375	0	1	0.2689	2	2	926.952	1852.9	-0.0720315	45.8456	25729	25729	MS2	15/30	20130120_Brassica_A3.raw
	High	ESTLGFVDLLR	Unambiguous	1	1	Bra028087		HCD	1	0	1	1	292	2.86321	0	0	0.0714984	4	2	625.343	1249.68	-0.376933	45.2827	25321	25321	MS2	12/20	20130120_Brassica_A1.raw
	High	ESTLGFVDLLR	Unambiguous	1	1	Bra028087		HCD	1	0	1	1	300	2.86011	0	0	4.64716	32	2	625.343	1249.68	-0.376933	86.5713	48591	48591	MS2	12/20	20130120_Brassica_A3.raw
	High	WSPELAAAcEVWK	Unambiguous	2	2	Bra028087 ;Bra041116	C9(Carbamidomethyl)	HCD	1	0	1	1	280	2.85608	0	0	15.7395	23	2	773.87	1546.73	-2.01691	41.8262	23462	23462	MS2	13/24	20130120_Brassica_A3.raw
	High	LEGDRESTLGFVDLLR	Unambiguous	1	1	Bra028087		HCD	1	0	1	1	363	2.85024	0	1	3.09087	50	3	607.324	1819.96	0.625037	92.0358	51487	51487	MS2	18/60	20130120_Brassica_A2.raw
	High	ESTLGFVDLLR	Unambiguous	1	1	Bra028087		HCD	1	0	1	1	314	2.84991	0	0	17.3939	50	2	625.342	1249.68	-2.23288	87.9466	49364	49364	MS2	12/20	20130120_Brassica_A3.raw
	High	LEGDRESTLGFVDLLR	Unambiguous	1	1	Bra028087		HCD	1	0	1	1	346	2.84852	0	1	2.59045	32	3	607.323	1819.95	-0.381062	43.1492	24215	24215	MS2	15/60	20130120_Brassica_A3.raw
	High	DLAVEGNEIIR	Unambiguous	1	1	Bra028087		HCD	1	0	1	1	164	2.84815	0	0	0	36	1	1228.65	1228.65	0.544803	34.0774	18961	18961	MS2	14/20	20130120_Brassica_A5.raw
	High	DLAVEGNEIIR	Unambiguous	1	1	Bra028087		HCD	1	0	1	1	160	2.84463	0	0	0	21	1	1228.65	1228.65	0.644156	33.8141	18811	18811	MS2	14/20	20130120_Brassica_A5.raw
	High	DLAVEGNEIIR	Unambiguous	1	1	Bra028087		HCD	1	0	1	1	204	2.84197	0	0	11.1542	31	2	614.831	1228.65	1.0803	37.2707	20869	20869	MS2	15/20	20130120_Brassica_A3.raw
	High	DRFLFcAEAIYK	Unambiguous	1	1	Bra028087	C6(Carbamidomethyl)	HCD	1	0	1	1	325	2.83666	0	1	15.2542	32	2	766.883	1532.76	1.25083	39.8045	22174	22174	MS2	15/22	20130120_Brassica_A2.raw
	High	VALEAcVQAR	Unambiguous	2	2	Bra028087 ;Bra041116	C6(Carbamidomethyl)	HCD	1	0	1	1	293	2.83401	0	0	21.5693	17	2	558.795	1116.58	-0.992781	27.3356	15098	15098	MS2	12/18	20130120_Brassica_A5.raw
	High	VALEAcVQAR	Unambiguous	2	2	Bra028087 ;Bra041116	C6(Carbamidomethyl)	HCD	1	0	1	1	259	2.83298	0	0	0	45	1	1116.58	1116.58	-1.58203	26.9906	14932	14932	MS2	17/18	20130120_Brassica_A3.raw
	High	VTPQPGVPPEEAGAAVAAESSTGTWTTVWTDGLTSLDR	Unambiguous	1	1	Bra028087		HCD	1	0	1	1	390	2.83229	0	0	0	50	3	1285.63	3854.86	-1.88593	61.5742	34411	34411	MS2	23/148	20130120_Brassica_A4.raw
	High	TFQGPPHGIQVER	Unambiguous	2	2	Bra028087 ;Bra041116		HCD	1	0	1	1	226	2.83223	0	0		31	1	1465.75	1465.75	-0.325284	28.1305	15604	15604	MS2	13/24	20130120_Brassica_A3.raw
	High	TFQGPPHGIQVER	Unambiguous	2	2	Bra028087 ;Bra041116		HCD	1	0	1	1	244	2.8307	0	0	0	50	1	1465.76	1465.76	3.12197	28.3324	15652	15652	MS2	13/24	20130120_Brassica_A2.raw
	High	LEDLRIPPAYTK	Unambiguous	1	1	Bra028087		HCD	1	0	1	1	270	2.82976	0	1	22.1243	18	3	472.601	1415.79	-0.41697	32.3669	18066	18066	MS2	19/44	20130120_Brassica_A3.raw
	High	WSPELAAAcEVWK	Unambiguous	2	2	Bra028087 ;Bra041116	C9(Carbamidomethyl)	HCD	1	0	1	1	262	2.82846	0	0	4.65577	3	2	773.871	1546.73	-0.675242	42.5406	23780	23780	MS2	14/24	20130120_Brassica_A1.raw
	High	LEGDRESTLGFVDLLR	Unambiguous	1	1	Bra028087		HCD	1	0	1	1	363	2.82839	0	1	12.9844	50	3	607.324	1819.96	0.926866	92.8134	51969	51969	MS2	18/60	20130120_Brassica_A1.raw
	High	LEGDRESTLGFVDLLRDDYVEK	Unambiguous	1	1	Bra028087		HCD	1	0	1	1	472	2.81755	0	2	5.553	16	3	857.098	2569.28	0.241473	43.5074	24416	24416	MS2	20/84	20130120_Brassica_A3.raw
	High	TFQGPPHGIQVER	Unambiguous	2	2	Bra028087 ;Bra041116		HCD	1	0	1	1	374	2.8161	0	0		50	2	733.383	1465.76	3.12569	91.6243	51425	51425	MS2	15/24	20130120_Brassica_A3.raw
	High	DDENVNSQPFmR	Unambiguous	2	2	Bra028087 ;Bra041116	M11(Oxidation)	HCD	1	0	1	1	64	2.81598	0	0	11.7061	12	2	734.312	1467.62	-0.142737	26.1265	14416	14416	MS2	14/22	20130120_Brassica_A1.raw
	High	VTPQPGVPPEEAGAAVAAESSTGTWTTVWTDGLTSLDR	Unambiguous	1	1	Bra028087		HCD	1	0	1	1	396	2.81462	0	0	76.062	50	3	1285.63	3854.86	-2.36093	56.9798	31833	31833	MS2	21/148	20130120_Brassica_A4.raw
	High	WSPELAAAcEVWK	Unambiguous	2	2	Bra028087 ;Bra041116	C9(Carbamidomethyl)	HCD	1	0	1	1	238	2.81128	0	0	15.735	50	2	773.872	1546.74	0.903183	84.5752	47473	47473	MS2	13/24	20130120_Brassica_A3.raw
	High	FLFcAEAIYK	Unambiguous	1	1	Bra028087	C4(Carbamidomethyl)	HCD	1	0	1	1	345	2.80836	0	0	0	3	1	1261.63	1261.63	-0.341988	41.1763	23092	23092	MS2	16/18	20130120_Brassica_A3.raw
	High	GGLDFTKDDENVNSQPFmR	Unambiguous	2	2	Bra028087 ;Bra041116	M18(Oxidation)	HCD	1	0	1	1	271	2.80806	0	1	30.6627	50	3	729.334	2185.99	2.05767	91.9655	51455	51455	MS2	21/72	20130120_Brassica_A4.raw
	High	DTDILAAFR	Unambiguous	1	1	Bra028087		HCD	1	0	1	1	273	2.80618	0	0	0.880685	1	1	1021.53	1021.53	-0.268612	39.9396	22385	22385	MS2	15/16	20130120_Brassica_A3.raw
	High	DLAVEGNEIIR	Unambiguous	1	1	Bra028087		HCD	1	0	1	1	201	2.80597	0	0	0	47	2	614.83	1228.65	-0.906759	92.6411	51991	51991	MS2	14/20	20130120_Brassica_A3.raw
	High	DLAVEGNEIIR	Unambiguous	1	1	Bra028087		HCD	1	0	1	1	152	2.80571	0	0	0	14	1	1228.65	1228.65	1.14092	33.8484	18925	18925	MS2	14/20	20130120_Brassica_A3.raw
	High	DDENVNSQPFmR	Unambiguous	2	2	Bra028087 ;Bra041116	M11(Oxidation)	HCD	1	0	1	1	65	2.80514	0	0	0	1	2	734.312	1467.62	-0.641792	26.3849	14564	14564	MS2	13/22	20130120_Brassica_A1.raw
	High	DLAVEGNEIIR	Unambiguous	1	1	Bra028087		HCD	1	0	1	1	235	2.80015	0	0	11.1246	32	2	614.83	1228.65	-0.211288	32.9864	18427	18427	MS2	14/20	20130120_Brassica_A3.raw
	High	NEGRDLAVEGNEIIR	Unambiguous	1	1	Bra028087		HCD	1	0	1	1	357	2.79658	0	1	32.2308	50	2	842.939	1684.87	5.64786	31.2654	17431	17431	MS2	16/28	20130120_Brassica_A3.raw
	High	LEGDRESTLGFVDLLR	Unambiguous	1	1	Bra028087		HCD	1	0	1	1	344	2.7939	0	1	0	3	3	607.323	1819.95	-0.682892	43.1087	24038	24038	MS2	16/60	20130120_Brassica_A2.raw
	High	FLFcAEAIYK	Unambiguous	1	1	Bra028087	C4(Carbamidomethyl)	HCD	1	0	1	1	363	2.79061	0	0	0	37	1	1261.63	1261.63	1.59313	41.6948	23303	23303	MS2	16/18	20130120_Brassica_A1.raw
	High	EITFNFPTIDKLDGQD	Unambiguous	1	1	Bra028087		HCD	1	0	1	1	283	2.79023	0	1	0	0	2	926.951	1852.9	-0.664959	46.3594	26017	26017	MS2	13/30	20130120_Brassica_A3.raw
	High	DDENVNSQPFmR	Unambiguous	2	2	Bra028087 ;Bra041116	M11(Oxidation)	HCD	1	0	1	1	64	2.78941	0	0	2.90382	4	2	734.312	1467.62	-0.392264	26.586	14650	14650	MS2	14/22	20130120_Brassica_A2.raw
	High	VTPQPGVPPEEAGAAVAAESSTGTWTTVWTDGLTSLDR	Unambiguous	1	1	Bra028087		HCD	1	0	1	1	402	2.78888	0	0	0	50	3	1285.62	3854.86	-3.78593	62.7626	35081	35081	MS2	23/148	20130120_Brassica_A4.raw
	High	ESTLGFVDLLRDDYVEK	Unambiguous	1	1	Bra028087		HCD	1	0	1	1	399	2.78784	0	1	4.19024	50	3	667.004	1999	-2.02771	45.7866	25566	25566	MS2	22/64	20130120_Brassica_A6.raw
	High	FLFcAEAIYK	Unambiguous	1	1	Bra028087	C4(Carbamidomethyl)	HCD	1	0	1	1	357	2.78678	0	0	0	50	1	1261.63	1261.63	2.56069	40.9122	22942	22942	MS2	16/18	20130120_Brassica_A3.raw
	High	TFQGPPHGIQVER	Unambiguous	2	2	Bra028087 ;Bra041116		HCD	1	0	1	1	360	2.78619	0	0	33.7681	13	3	489.254	1465.75	-5.70343	29.4392	16371	16371	MS2	21/48	20130120_Brassica_A3.raw
	High	DTDILAAFR	Unambiguous	1	1	Bra028087		HCD	1	0	1	1	278	2.78429	0	0	1.97197	20	2	511.269	1021.53	-0.341524	41.2846	22857	22857	MS2	10/16	20130120_Brassica_A7.raw
	High	DLAVEGNEIIR	Unambiguous	1	1	Bra028087		HCD	1	0	1	1	171	2.78039	0	0	4.21318	12	2	614.832	1228.66	2.07383	91.8643	51559	51559	MS2	13/20	20130120_Brassica_A3.raw
	High	ESTLGFVDLLR	Unambiguous	1	1	Bra028087		HCD	1	0	1	1	296	2.77878	0	0	14.7657	50	2	625.345	1249.68	3.04191	91.3542	51109	51109	MS2	12/20	20130120_Brassica_A2.raw
	High	LNYYTPEYETK	Unambiguous	1	1	Bra028087		HCD	1	0	1	1	222	2.77799	0	0	25.61	50	2	710.836	1420.66	0.53824	32.9483	18287	18287	MS2	12/20	20130120_Brassica_A2.raw
	High	ESTLGFVDLLR	Unambiguous	1	1	Bra028087		HCD	1	0	1	1	316	2.77546	0	0	0	50	1	1249.68	1249.68	-0.415014	45.1873	25360	25360	MS2	17/20	20130120_Brassica_A3.raw
	High	DLAVEGNEIIR	Unambiguous	1	1	Bra028087		HCD	1	0	1	1	195	2.77526	0	0	1.27723	29	2	614.83	1228.65	-0.708053	92.381	51847	51847	MS2	13/20	20130120_Brassica_A3.raw
	High	DTDILAAFR	Unambiguous	1	1	Bra028087		HCD	1	0	1	1	330	2.77453	0	0	0	50	1	1021.53	1021.53	-1.46359	87.9292	49354	49354	MS2	14/16	20130120_Brassica_A3.raw
	High	DRFLFcAEAIYK	Unambiguous	1	1	Bra028087	C6(Carbamidomethyl)	HCD	1	0	1	1	326	2.77439	0	1	45.9581	50	2	766.883	1532.76	1.33047	39.7787	22292	22292	MS2	13/22	20130120_Brassica_A3.raw
	High	LEDLRIPPAYTK	Unambiguous	1	1	Bra028087		HCD	1	0	1	1	276	2.77237	0	1	0	50	2	708.399	1415.79	0.433179	32.1603	17867	17867	MS2	14/22	20130120_Brassica_A5.raw
	High	DDENVNSQPFmR	Unambiguous	2	2	Bra028087 ;Bra041116	M11(Oxidation)	HCD	1	0	1	1	64	2.77185	0	0	0.184796	1	2	734.312	1467.62	-0.724968	26.3209	14497	14497	MS2	15/22	20130120_Brassica_A2.raw
	High	YGRPLLGcTIKPK	Unambiguous	2	2	Bra028087 ;Bra041116	C8(Carbamidomethyl)	HCD	1	0	1	1	186	2.7706	0	0	49.2775	9	3	501.622	1502.85	0.335323	27.0092	14911	14911	MS2	23/48	20130120_Brassica_A5.raw
	High	DLAVEGNEIIR	Unambiguous	1	1	Bra028087		HCD	1	0	1	1	182	2.76947	0	0	4.1175	46	2	614.833	1228.66	4.75634	91.7281	51316	51316	MS2	13/20	20130120_Brassica_A2.raw
	High	DLAVEGNEIIR	Unambiguous	1	1	Bra028087		HCD	1	0	1	1	192	2.76658	0	0	2.86429	5	2	614.831	1228.66	1.77577	91.5992	51412	51412	MS2	13/20	20130120_Brassica_A3.raw
	High	DRFLFcAEAIYK	Unambiguous	1	1	Bra028087	C6(Carbamidomethyl)	HCD	1	0	1	1	326	2.76521	0	1	45.7302	50	3	511.591	1532.76	1.28188	39.6627	22095	22095	MS2	22/44	20130120_Brassica_A2.raw
	High	DLAVEGNEIIR	Unambiguous	1	1	Bra028087		HCD	1	0	1	1	174	2.76255	0	0	0	50	1	1228.65	1228.65	0.842861	35.9776	20135	20135	MS2	15/20	20130120_Brassica_A3.raw
	High	LNYYTPEYETK	Unambiguous	1	1	Bra028087		HCD	1	0	1	1	211	2.76191	0	0	2.1356	1	2	710.834	1420.66	-1.43803	30.3696	16911	16911	MS2	12/20	20130120_Brassica_A3.raw
	High	GHYLNATAGTcEEmmK	Unambiguous	1	1	Bra028087	C11(Carbamidomethyl); M14(Oxidation); M15(Oxidation)	HCD	1	0	1	1	62	2.76098	0	0	45.0462	50	3	615.591	1844.76	-2.31637	24.3016	13372	13372	MS2	18/60	20130120_Brassica_A3.raw
	High	DTDILAAFR	Unambiguous	1	1	Bra028087		HCD	1	0	1	1	356	2.75794	0	0	14.4627	50	1	1021.53	1021.53	0.98611	40.8487	22763	22763	MS2	15/16	20130120_Brassica_A2.raw
	High	DLAVEGNEIIR	Unambiguous	1	1	Bra028087		HCD	1	0	1	1	245	2.75708	0	0	4.75774	38	2	614.836	1228.66	9.22716	91.7013	51356	51356	MS2	13/20	20130120_Brassica_A1.raw
	High	DTDILAAFR	Unambiguous	1	1	Bra028087		HCD	1	0	1	1	263	2.75085	0	0	0.816022	8	2	511.27	1021.53	0.435209	87.2028	48946	48946	MS2	10/16	20130120_Brassica_A3.raw
	High	DTDILAAFR	Unambiguous	1	1	Bra028087		HCD	1	0	1	1	350	2.75008	0	0	0.148659	9	2	511.27	1021.53	1.68993	87.7256	49239	49239	MS2	11/16	20130120_Brassica_A3.raw
	High	DTDILAAFR	Unambiguous	1	1	Bra028087		HCD	1	0	1	1	349	2.74922	0	0	26.2859	17	1	1021.53	1021.53	1.82259	91.5428	51379	51379	MS2	15/16	20130120_Brassica_A3.raw
	High	VTPQPGVPPEEAGAAVAAESSTGTWTTVWTDGLTSLDR	Unambiguous	1	1	Bra028087		HCD	1	0	1	1	424	2.74888	0	0	0	50	3	1285.63	3854.87	0.0140601	54.7063	30558	30558	MS2	22/148	20130120_Brassica_A4.raw
	High	LNYYTPEYETK	Unambiguous	1	1	Bra028087		HCD	1	0	1	1	210	2.74769	0	0	0.313552	0	2	710.835	1420.66	-0.664709	31.1819	17327	17327	MS2	12/20	20130120_Brassica_A1.raw
	High	LEGDRESTLGFVDLLR	Unambiguous	1	1	Bra028087		HCD	1	0	1	1	336	2.74382	0	1	38.2048	50	2	910.487	1819.97	6.80312	91.7189	51478	51478	MS2	18/30	20130120_Brassica_A3.raw
	High	VTPQPGVPPEEAGAAVAAESSTGTWTTVWTDGLTSLDR	Unambiguous	1	1	Bra028087		HCD	1	0	1	1	399	2.73659	0	0	0	50	3	1285.63	3854.89	3.62403	60.7617	33955	33955	MS2	20/148	20130120_Brassica_A4.raw
	High	TFQGPPHGIQVER	Unambiguous	2	2	Bra028087 ;Bra041116		HCD	1	0	1	1	376	2.73515	0	0	12.7495	22	2	733.383	1465.76	2.23834	28.5631	15784	15784	MS2	18/24	20130120_Brassica_A6.raw
	High	DLAVEGNEIIR	Unambiguous	1	1	Bra028087		HCD	1	0	1	1	213	2.73503	0	0	15.6325	15	2	614.83	1228.65	-0.211288	34.4107	19124	19124	MS2	13/20	20130120_Brassica_A2.raw
	High	DTDILAAFR	Unambiguous	1	1	Bra028087		HCD	1	0	1	1	320	2.73415	0	0	1.07899	7	2	511.271	1021.53	3.36288	91.6416	51435	51435	MS2	10/16	20130120_Brassica_A3.raw
	High	DTDILAAFR	Unambiguous	1	1	Bra028087		HCD	1	0	1	1	314	2.72842	0	0	6.83675	50	2	511.269	1021.53	-0.939011	46.9098	26168	26168	MS2	11/16	20130120_Brassica_A2.raw
	High	EITFNFPTIDKLDGQD	Unambiguous	1	1	Bra028087		HCD	1	0	1	1	315	2.72693	0	1	18.4924	14	2	926.952	1852.9	-0.137912	47.4546	26629	26629	MS2	14/30	20130120_Brassica_A3.raw
	High	WSPELAAAcEVWK	Unambiguous	2	2	Bra028087 ;Bra041116	C9(Carbamidomethyl)	HCD	1	0	1	1	268	2.72691	0	0	0	14	2	773.871	1546.74	-0.201714	42.5805	23757	23757	MS2	13/24	20130120_Brassica_A6.raw
	High	DDENVNSQPFmR	Unambiguous	2	2	Bra028087 ;Bra041116	M11(Oxidation)	HCD	1	0	1	1	68	2.72101	0	0	21.1646	10	2	734.312	1467.62	0.106791	26.3552	14560	14560	MS2	13/22	20130120_Brassica_A3.raw
	High	ESTLGFVDLLRDDYVEK	Unambiguous	1	1	Bra028087		HCD	1	0	1	1	381	2.72054	0	1	3.79783	24	3	667.006	1999	0.81185	45.7606	25558	25558	MS2	20/64	20130120_Brassica_A4.raw
	High	ESTLGFVDLLR	Unambiguous	1	1	Bra028087		HCD	1	0	1	1	288	2.71946	0	0	8.99656	50	2	625.343	1249.68	-0.18157	95.4633	53552	53552	MS2	12/20	20130120_Brassica_A3.raw
	High	LSGGDHVHAGTVVGK	Unambiguous	1	1	Bra028087		HCD	1	0	1	1	378	2.71778	0	0	1.6829	50	3	478.588	1433.75	0.160242	21.6107	11852	11852	MS2	20/56	20130120_Brassica_A5.raw
	High	GGLDFTKDDENVNSQPFmR	Unambiguous	2	2	Bra028087 ;Bra041116	M18(Oxidation)	HCD	1	0	1	1	251	2.71767	0	1	22.5139	50	3	729.332	2185.98	-0.203936	35.638	19818	19818	MS2	17/72	20130120_Brassica_A2.raw
	High	ESTLGFVDLLR	Unambiguous	1	1	Bra028087		HCD	1	0	1	1	295	2.71754	0	0	58.906	37	2	625.342	1249.68	-0.86534	86.7696	48704	48704	MS2	12/20	20130120_Brassica_A3.raw
	High	GGLDFTKDDENVNSQPFmR	Unambiguous	2	2	Bra028087 ;Bra041116	M18(Oxidation)	HCD	1	0	1	1	252	2.71694	0	1	65.3681	50	3	729.332	2185.98	-0.287699	92.4678	51779	51779	MS2	20/72	20130120_Brassica_A1.raw
	High	DTDILAAFR	Unambiguous	1	1	Bra028087		HCD	1	0	1	1	278	2.71632	0	0	0	50	2	511.269	1021.53	-0.341524	93.245	52325	52325	MS2	10/16	20130120_Brassica_A3.raw
	High	DTDILAAFR	Unambiguous	1	1	Bra028087		HCD	1	0	1	1	352	2.71607	0	0	2.45125	26	2	511.272	1021.54	5.69306	91.6496	51273	51273	MS2	10/16	20130120_Brassica_A2.raw
	High	DLAVEGNEIIR	Unambiguous	1	1	Bra028087		HCD	1	0	1	1	225	2.71516	0	0	27.1747	3	2	614.83	1228.65	0.0867708	32.7082	18201	18201	MS2	13/20	20130120_Brassica_A1.raw
	High	GGLDFTKDDENVNSQPFmR	Unambiguous	2	2	Bra028087 ;Bra041116	M18(Oxidation)	HCD	1	0	1	1	262	2.71494	0	1	26.0341	40	3	729.331	2185.98	-2.1305	34.4865	19224	19224	MS2	22/72	20130120_Brassica_A1.raw
	High	DTDILAAFR	Unambiguous	1	1	Bra028087		HCD	1	0	1	1	278	2.71051	0	0	0	50	2	511.269	1021.53	-0.222026	88.5045	49680	49680	MS2	10/16	20130120_Brassica_A3.raw
	High	LEGDRESTLGFVDLLRDDYVEK	Unambiguous	1	1	Bra028087		HCD	1	0	1	1	452	2.70676	0	2	6.36575	50	3	857.1	2569.28	2.30822	44.0084	24577	24577	MS2	23/84	20130120_Brassica_A4.raw
	High	DTDILAAFR	Unambiguous	1	1	Bra028087		HCD	1	0	1	1	261	2.70527	0	0	5.92433	49	2	511.269	1021.53	0.255963	87.5213	49017	49017	MS2	10/16	20130120_Brassica_A1.raw
	High	LEDLRIPPAYTK	Unambiguous	1	1	Bra028087		HCD	1	0	1	1	291	2.70345	0	1	40.3394	50	2	708.397	1415.79	-1.89478	35.2849	19677	19677	MS2	14/22	20130120_Brassica_A1.raw
	High	DLAVEGNEIIR	Unambiguous	1	1	Bra028087		HCD	1	0	1	1	180	2.70332	0	0	5.96004	50	2	614.831	1228.65	0.980946	94.2024	52855	52855	MS2	13/20	20130120_Brassica_A3.raw
	High	DTDILAAFR	Unambiguous	1	1	Bra028087		HCD	1	0	1	1	285	2.70214	0	0	0	26	1	1021.53	1021.53	0.0301315	40.9871	22984	22984	MS2	14/16	20130120_Brassica_A3.raw
	High	LNYYTPEYETK	Unambiguous	1	1	Bra028087		HCD	1	0	1	1	228	2.69958	0	0	12.5431	7	2	710.834	1420.66	-1.43803	30.9232	17177	17177	MS2	12/20	20130120_Brassica_A1.raw
	High	DLAVEGNEIIR	Unambiguous	1	1	Bra028087		HCD	1	0	1	1	196	2.69893	0	0	0.2979	12	2	614.83	1228.65	-0.310641	87.7069	49228	49228	MS2	13/20	20130120_Brassica_A3.raw
	High	DLAVEGNEIIR	Unambiguous	1	1	Bra028087		HCD	1	0	1	1	150	2.69725	0	0	0.956051	50	2	614.83	1228.65	-1.10547	93.1625	52279	52279	MS2	13/20	20130120_Brassica_A3.raw
	High	EITFNFPTIDK	Unambiguous	1	1	Bra028087		HCD	1	0	1	1	331	2.6971	0	0	18.6884	33	2	662.844	1324.68	1.37549	91.4331	51318	51318	MS2	14/20	20130120_Brassica_A3.raw
	High	DTDILAAFR	Unambiguous	1	1	Bra028087		HCD	1	0	1	1	345	2.69502	0	0	1.14714	50	2	511.273	1021.54	8.20247	91.8484	51437	51437	MS2	10/16	20130120_Brassica_A1.raw
	High	DTDILAAFR	Unambiguous	1	1	Bra028087		HCD	1	0	1	1	269	2.6934	0	0	0	49	2	511.269	1021.53	0.315712	87.7924	49169	49169	MS2	10/16	20130120_Brassica_A1.raw
	High	LNYYTPEYETK	Unambiguous	1	1	Bra028087		HCD	1	0	1	1	228	2.693	0	0	40.335	5	2	710.834	1420.66	-1.52396	31.7074	17685	17685	MS2	12/20	20130120_Brassica_A3.raw
	High	DDENVNSQPFmR	Unambiguous	2	2	Bra028087 ;Bra041116	M11(Oxidation)	HCD	1	0	1	1	64	2.69245	0	0	1.47872	1	2	734.311	1467.62	-0.974496	26.0949	14407	14407	MS2	13/22	20130120_Brassica_A3.raw
	High	VTPQPGVPPEEAGAAVAAESSTGTWTTVWTDGLTSLDR	Unambiguous	1	1	Bra028087		HCD	1	0	1	1	383	2.69212	0	0	0	50	3	1285.64	3854.91	9.79891	91.7857	51403	51403	MS2	21/148	20130120_Brassica_A1.raw
	High	LNYYTPEYETK	Unambiguous	1	1	Bra028087		HCD	1	0	1	1	204	2.69063	0	0	8.71675	24	2	710.833	1420.66	-2.55506	32.3491	18055	18055	MS2	12/20	20130120_Brassica_A3.raw
	High	DTDILAAFR	Unambiguous	1	1	Bra028087		HCD	1	0	1	1	274	2.68922	0	0	0	50	2	511.27	1021.53	0.674204	92.7074	52028	52028	MS2	10/16	20130120_Brassica_A3.raw
	High	DLAVEGNEIIR	Unambiguous	1	1	Bra028087		HCD	1	0	1	1	183	2.68832	0	0	4.76881	50	2	614.831	1228.65	0.881594	92.747	51932	51932	MS2	14/20	20130120_Brassica_A1.raw
	High	ESTLGFVDLLRDDYVEKDR	Unambiguous	1	1	Bra028087		HCD	1	0	1	1	431	2.68773	0	2	27.6281	50	3	757.383	2270.13	1.62098	91.7619	51335	51335	MS2	20/72	20130120_Brassica_A2.raw
	High	FLFcAEAIYK	Unambiguous	1	1	Bra028087	C4(Carbamidomethyl)	HCD	1	0	1	1	340	2.68538	0	0	0	43	1	1261.63	1261.63	0.819085	41.7654	23314	23314	MS2	16/18	20130120_Brassica_A4.raw
	High	LEGDRESTLGFVDLLR	Unambiguous	1	1	Bra028087		HCD	1	0	1	1	354	2.68093	0	1	0.865821	4	3	607.323	1819.96	0.323208	42.5712	23884	23884	MS2	13/60	20130120_Brassica_A3.raw
	High	DLAVEGNEIIR	Unambiguous	1	1	Bra028087		HCD	1	0	1	1	132	2.68052	0	0	7.0074	1	1	1228.65	1228.65	-0.846139	33.8101	18839	18839	MS2	13/20	20130120_Brassica_A1.raw
	High	ESTLGFVDLLR	Unambiguous	1	1	Bra028087		HCD	1	0	1	1	309	2.67853	0	0	13.4156	22	2	625.343	1249.68	0.0137925	42.8552	24046	24046	MS2	11/20	20130120_Brassica_A3.raw
	High	ESTLGFVDLLRDDYVEKDR	Unambiguous	1	1	Bra028087		HCD	1	0	1	1	417	2.67733	0	2	21.7601	50	3	757.381	2270.13	-0.395481	92.675	52010	52010	MS2	13/72	20130120_Brassica_A3.raw
	High	DLAVEGNEIIR	Unambiguous	1	1	Bra028087		HCD	1	0	1	1	198	2.67712	0	0	1.9869	50	2	614.832	1228.66	3.06735	91.9636	51501	51501	MS2	13/20	20130120_Brassica_A1.raw
	High	EITFNFPTIDK	Unambiguous	1	1	Bra028087		HCD	1	0	1	1	276	2.67597	0	0	41.4126	17	2	662.842	1324.68	-1.8498	42.5844	23760	23760	MS2	12/20	20130120_Brassica_A6.raw
	High	DTDILAAFR	Unambiguous	1	1	Bra028087		HCD	1	0	1	1	359	2.67559	0	0	8.11906	50	1	1021.53	1021.53	1.94209	91.7995	51523	51523	MS2	15/16	20130120_Brassica_A3.raw
	High	LNYYTPEYETK	Unambiguous	1	1	Bra028087		HCD	1	0	1	1	194	2.67457	0	0	0.831268	0	2	710.835	1420.66	-0.0632339	31.2425	17336	17336	MS2	12/20	20130120_Brassica_A4.raw
	High	DTDILAAFR	Unambiguous	1	1	Bra028087		HCD	1	0	1	1	286	2.67386	0	0	0	50	2	511.269	1021.53	0.0767172	92.9661	52171	52171	MS2	10/16	20130120_Brassica_A3.raw
	High	DDENVNSQPFmR	Unambiguous	2	2	Bra028087 ;Bra041116	M11(Oxidation)	HCD	1	0	1	1	64	2.67334	0	0	19.3285	20	3	489.877	1467.62	-0.131105	26.2626	14493	14493	MS2	16/44	20130120_Brassica_A1.raw
	High	YGRPLLGcTIKPK	Unambiguous	2	2	Bra028087 ;Bra041116	C8(Carbamidomethyl)	HCD	1	0	1	1	221	2.67231	0	0	0	50	2	751.929	1502.85	-0.488295	26.7939	14798	14798	MS2	15/24	20130120_Brassica_A1.raw
	High	DTDILAAFR	Unambiguous	1	1	Bra028087		HCD	1	0	1	1	288	2.67024	0	0	7.67572	46	2	511.269	1021.53	-0.102529	84.1993	47263	47263	MS2	10/16	20130120_Brassica_A3.raw
	High	ESTLGFVDLLRDDYVEKDR	Unambiguous	1	1	Bra028087		HCD	1	0	1	1	441	2.66774	0	2	14.3963	50	3	757.382	2270.13	0.0078124	92.9336	52153	52153	MS2	16/72	20130120_Brassica_A3.raw
	High	DLAVEGNEIIR	Unambiguous	1	1	Bra028087		HCD	1	0	1	1	187	2.66557	0	0	2.22031	50	2	614.83	1228.65	-0.708053	93.6835	52567	52567	MS2	13/20	20130120_Brassica_A3.raw
	High	LNYYTPEYETK	Unambiguous	1	1	Bra028087		HCD	1	0	1	1	196	2.66533	0	0	7.25524	36	2	710.835	1420.66	-0.235084	87.1156	48896	48896	MS2	13/20	20130120_Brassica_A3.raw
	High	EITFNFPTIDKLDGQD	Unambiguous	1	1	Bra028087		HCD	1	0	1	1	307	2.66515	0	1	24.2364	50	2	926.949	1852.89	-3.10256	48.6232	27194	27194	MS2	14/30	20130120_Brassica_A1.raw
	High	LNYYTPEYETK	Unambiguous	1	1	Bra028087		HCD	1	0	1	1	204	2.66487	0	0	79.3397	50	2	710.832	1420.66	-4.01579	91.723	51481	51481	MS2	12/20	20130120_Brassica_A3.raw
	High	LEGDRESTLGFVDLLR	Unambiguous	1	1	Bra028087		HCD	1	0	1	1	362	2.66476	0	1	21.394	50	3	607.321	1819.95	-3.7012	87.9693	49378	49378	MS2	18/60	20130120_Brassica_A3.raw
	High	GGLDFTKDDENVNSQPFmR	Unambiguous	2	2	Bra028087 ;Bra041116	M18(Oxidation)	HCD	1	0	1	1	263	2.66359	0	1	49.8876	29	3	729.331	2185.98	-2.21426	32.5859	18194	18194	MS2	16/72	20130120_Brassica_A3.raw
	High	ESTLGFVDLLR	Unambiguous	1	1	Bra028087		HCD	1	0	1	1	307	2.66249	0	0	14.0974	50	2	625.343	1249.68	-0.279252	88.764	49826	49826	MS2	11/20	20130120_Brassica_A3.raw
	High	GHYLNATAGTcEEmmK	Unambiguous	1	1	Bra028087	C11(Carbamidomethyl); M14(Oxidation); M15(Oxidation)	HCD	1	0	1	1	43	2.6618	0	0	0	50	2	922.884	1844.76	-0.654793	23.8018	13081	13081	MS2	14/30	20130120_Brassica_A4.raw
	High	VALEAcVQAR	Unambiguous	2	2	Bra028087 ;Bra041116	C6(Carbamidomethyl)	HCD	1	0	1	1	271	2.65784	0	0	3.29686	1	2	558.795	1116.58	-0.118181	27.8463	15371	15371	MS2	13/18	20130120_Brassica_A2.raw
	High	LNYYTPEYETK	Unambiguous	1	1	Bra028087		HCD	1	0	1	1	201	2.65664	0	0	0.345345	0	2	710.836	1420.66	0.624165	31.3943	17404	17404	MS2	13/20	20130120_Brassica_A2.raw
	High	DLAVEGNEIIR	Unambiguous	1	1	Bra028087		HCD	1	0	1	1	201	2.65634	0	0	2.352	50	2	614.831	1228.65	0.583535	92.2242	51645	51645	MS2	14/20	20130120_Brassica_A1.raw
	High	DLAVEGNEIIR	Unambiguous	1	1	Bra028087		HCD	1	0	1	1	169	2.65597	0	0	0	50	1	1228.65	1228.65	-0.746786	33.5516	18689	18689	MS2	14/20	20130120_Brassica_A1.raw
	High	DLAVEGNEIIR	Unambiguous	1	1	Bra028087		HCD	1	0	1	1	191	2.65555	0	0	2.71213	50	2	614.83	1228.65	-0.906759	92.901	52135	52135	MS2	13/20	20130120_Brassica_A3.raw
	High	VALEAcVQAR	Unambiguous	2	2	Bra028087 ;Bra041116	C6(Carbamidomethyl)	HCD	1	0	1	1	294	2.65531	0	0	12.502	26	2	558.794	1116.58	-1.53941	28.9267	16032	16032	MS2	14/18	20130120_Brassica_A1.raw
	High	LNYYTPEYETK	Unambiguous	1	1	Bra028087		HCD	1	0	1	1	196	2.65454	0	0	78.4515	50	2	710.831	1420.65	-6.42172	92.6305	51986	51986	MS2	11/20	20130120_Brassica_A3.raw
	High	ESTLGFVDLLR	Unambiguous	1	1	Bra028087		HCD	1	0	1	1	287	2.6532	0	0	0	28	2	625.342	1249.68	-0.86534	45.7817	25693	25693	MS2	12/20	20130120_Brassica_A3.raw
	High	DTDILAAFR	Unambiguous	1	1	Bra028087		HCD	1	0	1	1	280	2.65262	0	0	3.07035	14	2	511.269	1021.53	0.255963	40.8514	22765	22765	MS2	10/16	20130120_Brassica_A2.raw
	High	LNYYTPEYETK	Unambiguous	1	1	Bra028087		HCD	1	0	1	1	188	2.65016	0	0	0.243777	0	2	710.835	1420.66	0.108616	30.6313	17064	17064	MS2	12/20	20130120_Brassica_A3.raw
	High	DDENVNSQPFmR	Unambiguous	2	2	Bra028087 ;Bra041116	M11(Oxidation)	HCD	1	0	1	1	68	2.64989	0	0	31.696	32	2	734.312	1467.62	0.273143	26.2889	14503	14503	MS2	13/22	20130120_Brassica_A5.raw
	High	LNYYTPEYETK	Unambiguous	1	1	Bra028087		HCD	1	0	1	1	223	2.64975	0	0	58.5657	29	2	710.834	1420.66	-2.21136	32.2798	17957	17957	MS2	11/20	20130120_Brassica_A1.raw
	High	ESTLGFVDLLR	Unambiguous	1	1	Bra028087		HCD	1	0	1	1	307	2.64974	0	0	31.3246	50	2	625.342	1249.68	-1.74447	92.235	51766	51766	MS2	12/20	20130120_Brassica_A3.raw
	High	DLAVEGNEIIR	Unambiguous	1	1	Bra028087		HCD	1	0	1	1	188	2.64581	0	0	0	50	2	614.83	1228.65	-0.409994	93.9448	52712	52712	MS2	13/20	20130120_Brassica_A3.raw
	High	LEGDRESTLGFVDLLR	Unambiguous	1	1	Bra028087		HCD	1	0	1	1	362	2.64578	0	1	37.6361	29	3	607.323	1819.96	0.323208	41.2079	22968	22968	MS2	20/60	20130120_Brassica_A2.raw
	High	DNGLLLHIHR	Unambiguous	2	2	Bra028087 ;Bra041116		HCD	1	0	1	1	251	2.64529	0	0	0	50	1	1187.66	1187.66	-0.704805	29.0626	16075	16075	MS2	10/18	20130120_Brassica_A2.raw
	High	DLAVEGNEIIR	Unambiguous	1	1	Bra028087		HCD	1	0	1	1	222	2.64519	0	0	4.4723	36	2	614.83	1228.65	-0.807406	34.6068	19244	19244	MS2	13/20	20130120_Brassica_A6.raw
	High	LNYYTPEYETK	Unambiguous	1	1	Bra028087		HCD	1	0	1	1	245	2.64346	0	0	14.1347	16	2	710.838	1420.67	3.45967	91.5672	51394	51394	MS2	12/20	20130120_Brassica_A3.raw
	High	DLAVEGNEIIR	Unambiguous	1	1	Bra028087		HCD	1	0	1	1	182	2.63978	0	0	2.05587	3	2	614.831	1228.65	1.37836	34.0957	19001	19001	MS2	13/20	20130120_Brassica_A1.raw
	High	DLAVEGNEIIR	Unambiguous	1	1	Bra028087		HCD	1	0	1	1	195	2.63461	0	0	4.63934	50	2	614.831	1228.66	1.47771	91.9874	51460	51460	MS2	13/20	20130120_Brassica_A2.raw
	High	DLAVEGNEIIR	Unambiguous	1	1	Bra028087		HCD	1	0	1	1	220	2.63398	0	0	1.87813	50	2	614.83	1228.65	0.285477	92.2474	51604	51604	MS2	13/20	20130120_Brassica_A2.raw
	High	DLAVEGNEIIR	Unambiguous	1	1	Bra028087		HCD	1	0	1	1	194	2.63365	0	0	3.47499	25	2	614.831	1228.65	1.279	34.322	18956	18956	MS2	13/20	20130120_Brassica_A7.raw
	High	EITFNFPTIDK	Unambiguous	1	1	Bra028087		HCD	1	0	1	1	311	2.63331	0	0	36.2113	38	2	662.841	1324.67	-3.50852	42.4563	23703	23703	MS2	12/20	20130120_Brassica_A4.raw
	High	DDENVNSQPFmR	Unambiguous	2	2	Bra028087 ;Bra041116	M11(Oxidation)	HCD	1	0	1	1	66	2.63312	0	0	29.8784	50	2	734.312	1467.62	-0.641792	26.268	14479	14479	MS2	13/22	20130120_Brassica_A4.raw
	High	ESTLGFVDLLRDDYVEKDR	Unambiguous	1	1	Bra028087		HCD	1	0	1	1	426	2.63253	0	2	27.7135	50	3	757.386	2270.14	6.3798	91.7394	51378	51378	MS2	21/72	20130120_Brassica_A1.raw
	High	LNYYTPEYETK	Unambiguous	1	1	Bra028087		HCD	1	0	1	1	213	2.63213	0	0	20.871	8	2	710.835	1420.66	-0.321009	31.9309	17711	17711	MS2	13/20	20130120_Brassica_A2.raw
	High	LNYYTPEYETK	Unambiguous	1	1	Bra028087		HCD	1	0	1	1	206	2.62998	0	0	0.264579	0	2	710.835	1420.66	-0.836559	30.8927	17216	17216	MS2	12/20	20130120_Brassica_A3.raw
	High	DLAVEGNEIIR	Unambiguous	1	1	Bra028087		HCD	1	0	1	1	175	2.62984	0	0	4.52073	50	2	614.831	1228.65	1.17965	93.295	52180	52180	MS2	13/20	20130120_Brassica_A2.raw
	High	EITFNFPTIDKLDGQD	Unambiguous	1	1	Bra028087		HCD	1	0	1	1	295	2.62971	0	1	1.56453	12	2	926.951	1852.9	-0.599078	46.2405	25837	25837	MS2	13/30	20130120_Brassica_A5.raw
	High	DLAVEGNEIIR	Unambiguous	1	1	Bra028087		HCD	1	0	1	1	219	2.62919	0	0	24.9739	21	2	614.831	1228.65	0.384829	35.6709	19837	19837	MS2	14/20	20130120_Brassica_A2.raw
	High	ESTLGFVDLLRDDYVEK	Unambiguous	1	1	Bra028087		HCD	1	0	1	1	387	2.62847	0	1	25.6327	50	3	667.007	1999.01	1.72783	91.8481	51550	51550	MS2	20/64	20130120_Brassica_A3.raw
	High	GGLDFTKDDENVNSQPFmR	Unambiguous	2	2	Bra028087 ;Bra041116	M18(Oxidation)	HCD	1	0	1	1	260	2.62844	0	1	3.02198	50	3	729.332	2185.98	0.214882	93.7483	52603	52603	MS2	17/72	20130120_Brassica_A3.raw
	High	GGLDFTKDDENVNSQPFmR	Unambiguous	2	2	Bra028087 ;Bra041116	M18(Oxidation)	HCD	1	0	1	1	211	2.62754	0	1	0	50	2	1093.5	2185.99	1.8963	91.9446	51604	51604	MS2	13/36	20130120_Brassica_A3.raw
	High	DLAVEGNEIIR	Unambiguous	1	1	Bra028087		HCD	1	0	1	1	233	2.62717	0	0	65.1411	50	2	614.83	1228.65	-0.509347	36.0161	20091	20091	MS2	16/20	20130120_Brassica_A1.raw
	High	ESTLGFVDLLR	Unambiguous	1	1	Bra028087		HCD	1	0	1	1	290	2.6228	0	0	0	50	2	625.343	1249.68	0.209155	85.2203	47833	47833	MS2	11/20	20130120_Brassica_A3.raw
	High	LNYYTPEYETK	Unambiguous	1	1	Bra028087		HCD	1	0	1	1	210	2.6227	0	0	1.47791	1	2	710.835	1420.66	-0.492859	31.3614	17381	17381	MS2	12/20	20130120_Brassica_A6.raw
	High	DLAVEGNEIIR	Unambiguous	1	1	Bra028087		HCD	1	0	1	1	188	2.62172	0	0	3.16885	50	2	614.831	1228.65	0.682888	92.5079	51748	51748	MS2	13/20	20130120_Brassica_A2.raw
	High	LNYYTPEYETK	Unambiguous	1	1	Bra028087		HCD	1	0	1	1	215	2.61894	0	0	5.49452	46	2	710.834	1420.66	-1.43803	87.6618	49203	49203	MS2	12/20	20130120_Brassica_A3.raw
	High	LEGDRESTLGFVDLLR	Unambiguous	1	1	Bra028087		HCD	1	0	1	1	365	2.61877	0	1	1.26144	50	3	607.323	1819.96	0.222598	94.7414	53152	53152	MS2	17/60	20130120_Brassica_A3.raw
	High	WSPELAAAcEVWK	Unambiguous	2	2	Bra028087 ;Bra041116	C9(Carbamidomethyl)	HCD	1	0	1	1	276	2.61746	0	0	22.7906	34	2	773.871	1546.74	-0.280635	42.8336	23914	23914	MS2	12/24	20130120_Brassica_A4.raw
	High	FLFcAEAIYK	Unambiguous	1	1	Bra028087	C4(Carbamidomethyl)	HCD	1	0	1	1	365	2.61695	0	0	0	50	1	1261.63	1261.63	3.91527	41.9522	23533	23533	MS2	15/18	20130120_Brassica_A3.raw
	High	LNYYTPEYETK	Unambiguous	1	1	Bra028087		HCD	1	0	1	1	207	2.61285	0	0	0	43	1	1420.66	1420.66	-1.72931	31.2132	17326	17326	MS2	13/20	20130120_Brassica_A5.raw
	High	LEDLRIPPAYTK	Unambiguous	1	1	Bra028087		HCD	1	0	1	1	269	2.6114	0	1	9.08054	10	2	708.398	1415.79	0.0882968	34.5966	19354	19354	MS2	13/22	20130120_Brassica_A3.raw
	High	LEDLRIPPAYTK	Unambiguous	1	1	Bra028087		HCD	1	0	1	1	291	2.61044	0	1	59.1019	36	3	472.6	1415.79	-2.03361	33.4244	18683	18683	MS2	17/44	20130120_Brassica_A3.raw
	High	DLAVEGNEIIR	Unambiguous	1	1	Bra028087		HCD	1	0	1	1	226	2.60887	0	0	40.5871	50	2	614.834	1228.66	6.24661	91.6509	51323	51323	MS2	14/20	20130120_Brassica_A5.raw
	High	LNYYTPEYETK	Unambiguous	1	1	Bra028087		HCD	1	0	1	1	229	2.60748	0	0	9.69468	50	2	710.835	1420.66	-0.492859	31.6386	17541	17541	MS2	12/20	20130120_Brassica_A6.raw
	High	DLAVEGNEIIR	Unambiguous	1	1	Bra028087		HCD	1	0	1	1	211	2.60724	0	0	12.0383	12	2	614.831	1228.65	1.279	35.0942	19569	19569	MS2	13/20	20130120_Brassica_A1.raw
	High	DLAVEGNEIIR	Unambiguous	1	1	Bra028087		HCD	1	0	1	1	188	2.60677	0	0	9.16204	0	2	614.83	1228.65	-0.6087	33.8429	18827	18827	MS2	13/20	20130120_Brassica_A5.raw
	High	EITFNFPTIDKLDGQD	Unambiguous	1	1	Bra028087		HCD	1	0	1	1	287	2.60665	0	1	0.519317	4	2	926.951	1852.9	-0.664959	46.2736	25877	25877	MS2	13/30	20130120_Brassica_A1.raw
	High	LNYYTPEYETK	Unambiguous	1	1	Bra028087		HCD	1	0	1	1	227	2.60451	0	0	17.7668	10	2	710.835	1420.66	-0.664709	31.1336	17255	17255	MS2	12/20	20130120_Brassica_A2.raw
	High	LNYYTPEYETK	Unambiguous	1	1	Bra028087		HCD	1	0	1	1	205	2.60387	0	0	77.1345	44	2	710.832	1420.66	-4.18765	91.8332	51542	51542	MS2	10/20	20130120_Brassica_A3.raw
	High	LNYYTPEYETK	Unambiguous	1	1	Bra028087		HCD	1	0	1	1	200	2.59974	0	0	3.98737	29	2	710.836	1420.66	0.452315	87.3881	49049	49049	MS2	12/20	20130120_Brassica_A3.raw
	High	ESTLGFVDLLR	Unambiguous	1	1	Bra028087		HCD	1	0	1	1	290	2.59893	0	0	19.7523	50	2	625.343	1249.68	0.404518	91.108	51137	51137	MS2	11/20	20130120_Brassica_A3.raw
	High	GHYLNATAGTcEEmmKR	Unambiguous	1	1	Bra028087	C11(Carbamidomethyl); M14(Oxidation); M15(Oxidation)	HCD	1	0	1	1	147	2.59719	0	1	0	50	2	1000.93	2000.86	-0.687598	22.5765	12386	12386	MS2	15/32	20130120_Brassica_A3.raw
	High	LNYYTPEYETK	Unambiguous	1	1	Bra028087		HCD	1	0	1	1	219	2.59387	0	0	4.43672	18	2	710.834	1420.66	-1.78173	29.4265	16364	16364	MS2	12/20	20130120_Brassica_A3.raw
	High	LGLSAKNYGR	Unambiguous	2	2	Bra028087 ;Bra041116		HCD	1	0	1	1	186	2.58968	0	1	9.78428	2	2	539.804	1078.6	-0.133483	24.8212	13670	13670	MS2	13/18	20130120_Brassica_A3.raw
	High	LNYYTPEYETK	Unambiguous	1	1	Bra028087		HCD	1	0	1	1	217	2.58923	0	0	0	50	2	710.833	1420.66	-2.38321	87.9306	49355	49355	MS2	12/20	20130120_Brassica_A3.raw
	High	DDENVNSQPFmR	Unambiguous	2	2	Bra028087 ;Bra041116	M11(Oxidation)	HCD	1	0	1	1	68	2.58922	0	0	7.26712	5	2	734.312	1467.62	-0.0595606	26.5301	14627	14627	MS2	12/22	20130120_Brassica_A4.raw
	High	DLAVEGNEIIR	Unambiguous	1	1	Bra028087		HCD	1	0	1	1	182	2.58798	0	0	0.804851	50	2	614.83	1228.65	-0.409994	93.4227	52423	52423	MS2	13/20	20130120_Brassica_A3.raw
	High	DLAVEGNEIIR	Unambiguous	1	1	Bra028087		HCD	1	0	1	1	182	2.58786	0	0	0.16933	0	2	614.83	1228.65	-0.0125821	33.827	18849	18849	MS2	13/20	20130120_Brassica_A1.raw
	High	DLAVEGNEIIR	Unambiguous	1	1	Bra028087		HCD	1	0	1	1	221	2.58644	0	0	60.3869	8	2	614.831	1228.65	0.583535	35.1082	19519	19519	MS2	14/20	20130120_Brassica_A2.raw
	High	VALEAcVQAR	Unambiguous	2	2	Bra028087 ;Bra041116	C6(Carbamidomethyl)	HCD	1	0	1	1	270	2.58509	0	0	19.672	10	2	558.795	1116.58	-0.00885626	29.0148	16047	16047	MS2	14/18	20130120_Brassica_A2.raw
	High	WSPELAAAcEVWK	Unambiguous	2	2	Bra028087 ;Bra041116	C9(Carbamidomethyl)	HCD	1	0	1	1	251	2.57911	0	0	13.1314	50	2	773.872	1546.74	0.350735	91.3494	51271	51271	MS2	12/24	20130120_Brassica_A3.raw
	High	DLAVEGNEIIR	Unambiguous	1	1	Bra028087		HCD	1	0	1	1	190	2.5781	0	0	4.67328	14	2	614.831	1228.65	1.0803	34.6071	19114	19114	MS2	13/20	20130120_Brassica_A7.raw
	High	DTDILAAFR	Unambiguous	1	1	Bra028087		HCD	1	0	1	1	313	2.57593	0	0	6.63621	50	1	1021.54	1021.54	3.67479	41.0166	22874	22874	MS2	14/16	20130120_Brassica_A6.raw
	High	DDENVNSQPFmR	Unambiguous	2	2	Bra028087 ;Bra041116	M11(Oxidation)	HCD	1	0	1	1	64	2.57236	0	0	42.6195	50	2	734.311	1467.62	-0.89132	26.3948	14541	14541	MS2	13/22	20130120_Brassica_A6.raw
	High	DLAVEGNEIIR	Unambiguous	1	1	Bra028087		HCD	1	0	1	1	176	2.57063	0	0	2.9642	4	2	614.831	1228.65	0.881594	35.1484	19665	19665	MS2	12/20	20130120_Brassica_A3.raw
	High	LNYYTPEYETK	Unambiguous	1	1	Bra028087		HCD	1	0	1	1	190	2.57007	0	0	0.414799	1	2	710.835	1420.66	-0.0632339	31.3683	17414	17414	MS2	12/20	20130120_Brassica_A5.raw
	High	DLAVEGNEIIR	Unambiguous	1	1	Bra028087		HCD	1	0	1	1	179	2.56921	0	0	0.170586	0	2	614.83	1228.65	-0.111935	33.2537	18583	18583	MS2	13/20	20130120_Brassica_A3.raw
	High	LNYYTPEYETK	Unambiguous	1	1	Bra028087		HCD	1	0	1	1	204	2.56921	0	0	4.68327	4	2	710.835	1420.66	0.194541	31.5178	17495	17495	MS2	12/20	20130120_Brassica_A4.raw
	High	LNYYTPEYETK	Unambiguous	1	1	Bra028087		HCD	1	0	1	1	193	2.56674	0	0	0.211282	9	2	710.835	1420.66	-0.149159	31.8796	17583	17583	MS2	11/20	20130120_Brassica_A7.raw
	High	DLAVEGNEIIR	Unambiguous	1	1	Bra028087		HCD	1	0	1	1	177	2.56552	0	0	0.256744	0	2	614.83	1228.65	-0.409994	34.2696	19043	19043	MS2	13/20	20130120_Brassica_A2.raw
	High	EITFNFPTIDK	Unambiguous	1	1	Bra028087		HCD	1	0	1	1	265	2.56543	0	0	0	12	1	1324.68	1324.68	-0.227002	41.8721	23488	23488	MS2	15/20	20130120_Brassica_A3.raw
	High	DLAVEGNEIIR	Unambiguous	1	1	Bra028087		HCD	1	0	1	1	174	2.56301	0	0	2.53313	50	2	614.832	1228.66	2.66994	93.0091	52077	52077	MS2	13/20	20130120_Brassica_A1.raw
	High	DLAVEGNEIIR	Unambiguous	1	1	Bra028087		HCD	1	0	1	1	182	2.56068	0	0	0.830095	3	2	614.83	1228.65	0.285477	34.5375	19196	19196	MS2	13/20	20130120_Brassica_A2.raw
	High	WSPELAAAcEVWK	Unambiguous	2	2	Bra028087 ;Bra041116	C9(Carbamidomethyl)	HCD	1	0	1	1	257	2.55798	0	0	12.2407	50	2	773.871	1546.73	-0.754163	84.3051	47321	47321	MS2	12/24	20130120_Brassica_A3.raw
	High	DLAVEGNEIIR	Unambiguous	1	1	Bra028087		HCD	1	0	1	1	201	2.55708	0	0	19.8418	10	2	614.831	1228.65	0.881594	35.7045	19980	19980	MS2	13/20	20130120_Brassica_A3.raw
	High	DLAVEGNEIIR	Unambiguous	1	1	Bra028087		HCD	1	0	1	1	212	2.5557	0	0	21.3258	12	2	614.831	1228.66	1.57706	35.3643	19722	19722	MS2	13/20	20130120_Brassica_A1.raw
	High	VALEAcVQAR	Unambiguous	2	2	Bra028087 ;Bra041116	C6(Carbamidomethyl)	HCD	1	0	1	1	300	2.55565	0	0	26.8436	4	2	558.795	1116.58	-0.555481	27.4328	15141	15141	MS2	14/18	20130120_Brassica_A4.raw
	High	DLAVEGNEIIR	Unambiguous	1	1	Bra028087		HCD	1	0	1	1	174	2.55406	0	0	2.32196	50	2	614.831	1228.65	1.17965	93.0328	52036	52036	MS2	13/20	20130120_Brassica_A2.raw
	High	LNYYTPEYETK	Unambiguous	1	1	Bra028087		HCD	1	0	1	1	224	2.55375	0	0	21.0402	50	2	710.834	1420.66	-1.00841	86.8434	48744	48744	MS2	12/20	20130120_Brassica_A3.raw
	High	LNYYTPEYETK	Unambiguous	1	1	Bra028087		HCD	1	0	1	1	260	2.55298	0	0	11.8358	50	2	710.838	1420.67	3.80337	91.3968	51141	51141	MS2	11/20	20130120_Brassica_A4.raw
	High	LNYYTPEYETK	Unambiguous	1	1	Bra028087		HCD	1	0	1	1	200	2.55006	0	0	63.5406	50	2	710.832	1420.66	-4.18765	92.6086	51973	51973	MS2	11/20	20130120_Brassica_A3.raw
	High	DLAVEGNEIIR	Unambiguous	1	1	Bra028087		HCD	1	0	1	1	190	2.54858	0	0	0	50	2	614.829	1228.65	-1.50288	88.2159	49517	49517	MS2	13/20	20130120_Brassica_A3.raw
	High	DLAVEGNEIIR	Unambiguous	1	1	Bra028087		HCD	1	0	1	1	199	2.54794	0	0	2.80761	16	2	614.831	1228.65	0.384829	87.1653	48924	48924	MS2	13/20	20130120_Brassica_A3.raw
	High	YGRPLLGcTIKPK	Unambiguous	2	2	Bra028087 ;Bra041116	C8(Carbamidomethyl)	HCD	1	0	1	1	222	2.54367	0	0	8.15237	23	2	751.929	1502.85	-0.650747	26.8285	14797	14797	MS2	15/24	20130120_Brassica_A4.raw
	High	DLAVEGNEIIR	Unambiguous	1	1	Bra028087		HCD	1	0	1	1	181	2.54077	0	0	3.54522	50	2	614.831	1228.65	1.17965	92.484	51788	51788	MS2	13/20	20130120_Brassica_A1.raw
	High	EITFNFPTIDKLDGQD	Unambiguous	1	1	Bra028087		HCD	1	0	1	1	292	2.53828	0	1	0.787124	5	2	926.951	1852.89	-0.862602	46.785	26165	26165	MS2	13/30	20130120_Brassica_A1.raw
	High	DLAVEGNEIIR	Unambiguous	1	1	Bra028087		HCD	1	0	1	1	179	2.53635	0	0	0	50	2	614.83	1228.65	0.0867708	94.4626	52999	52999	MS2	13/20	20130120_Brassica_A3.raw
	High	LNYYTPEYETK	Unambiguous	1	1	Bra028087		HCD	1	0	1	1	278	2.53338	0	0	16.8918	50	2	710.84	1420.67	6.89663	91.6538	51330	51330	MS2	12/20	20130120_Brassica_A1.raw
	High	VALEAcVQAR	Unambiguous	2	2	Bra028087 ;Bra041116	C6(Carbamidomethyl)	HCD	1	0	1	1	272	2.53174	0	0	0.478555	1	2	558.795	1116.58	-0.774131	28.7847	15988	15988	MS2	13/18	20130120_Brassica_A3.raw
	High	EITFNFPTIDKLDGQD	Unambiguous	1	1	Bra028087		HCD	1	0	1	1	277	2.53161	0	1	2.27066	27	2	926.952	1852.9	-0.203793	46.4485	25936	25936	MS2	12/30	20130120_Brassica_A6.raw
	High	DLAVEGNEIIR	Unambiguous	1	1	Bra028087		HCD	1	0	1	1	186	2.52992	0	0	2.13252	50	2	614.831	1228.65	0.583535	92.7701	51892	51892	MS2	13/20	20130120_Brassica_A2.raw
	High	VTPQPGVPPEEAGAAVAAESSTGTWTTVWTDGLTSLDR	Unambiguous	1	1	Bra028087		HCD	1	0	1	1	283	2.52987	0	0	0	50	2	1927.95	3854.89	4.75167	63.0371	35348	35348	MS2	16/74	20130120_Brassica_A3.raw
	High	DLAVEGNEIIR	Unambiguous	1	1	Bra028087		HCD	1	0	1	1	183	2.52944	0	0	3.80768	2	2	614.83	1228.65	0.0867708	34.2609	19064	19064	MS2	13/20	20130120_Brassica_A4.raw
	High	YGRPLLGcTIKPK	Unambiguous	2	2	Bra028087 ;Bra041116	C8(Carbamidomethyl)	HCD	1	0	1	1	213	2.52759	0	0	1.10921	1	2	751.928	1502.85	-1.38178	26.4481	14615	14615	MS2	13/24	20130120_Brassica_A3.raw
	High	LNYYTPEYETK	Unambiguous	1	1	Bra028087		HCD	1	0	1	1	197	2.52716	0	0	72.1627	50	2	710.832	1420.66	-4.61727	92.09	51685	51685	MS2	11/20	20130120_Brassica_A3.raw
	High	DTDILAAFR	Unambiguous	1	1	Bra028087		HCD	1	0	1	1	273	2.52681	0	0	0	50	2	511.269	1021.53	0.315712	86.4078	48499	48499	MS2	10/16	20130120_Brassica_A3.raw
	High	LNYYTPEYETK	Unambiguous	1	1	Bra028087		HCD	1	0	1	1	247	2.5236	0	0	71.0692	50	2	710.838	1420.67	3.5456	91.7422	51380	51380	MS2	13/20	20130120_Brassica_A1.raw
	High	VALEAcVQAR	Unambiguous	2	2	Bra028087 ;Bra041116	C6(Carbamidomethyl)	HCD	1	0	1	1	293	2.52354	0	0	39.1194	50	2	558.794	1116.58	-1.53941	28.0502	15423	15423	MS2	13/18	20130120_Brassica_A7.raw
	High	GGLDFTKDDENVNSQPFmR	Unambiguous	2	2	Bra028087 ;Bra041116	M18(Oxidation)	HCD	1	0	1	1	200	2.52335	0	1	0	50	2	1093.49	2185.98	-2.57109	34.8471	19495	19495	MS2	13/36	20130120_Brassica_A3.raw
	High	DLAVEGNEIIR	Unambiguous	1	1	Bra028087		HCD	1	0	1	1	189	2.52138	0	0	19.3063	1	2	614.83	1228.65	-1.00611	32.4065	18088	18088	MS2	13/20	20130120_Brassica_A3.raw
	High	DTDILAAFR	Unambiguous	1	1	Bra028087		HCD	1	0	1	1	341	2.52133	0	0	0.830393	19	2	511.27	1021.53	1.0327	91.9193	51591	51591	MS2	11/16	20130120_Brassica_A3.raw
Bra028181	Ribulose bisphosphate carboxylase (small chain) family protein	1282.37	72.22	2	5	16	342	162	18.4232	8.04541
	Confidence Level	Sequence	PSM Ambiguity	# Proteins	# Protein Groups	Protein Group Accessions	Modifications	Activation Type	ΔScore	ΔCn	Rank	Search Engine Rank	Peptides Matched	XCorr	Probability	# Missed Cleavages	Isolation Interference [%]	Ion Inject Time [ms]	Charge	m/z [Da]	MH+ [Da]	ΔM [ppm]	RT [min]	First Scan	Last Scan	MS Order	Ions Matched	Spectrum File
	High	KFETLSYLPDLTEVELGKEVDYLLR	Unambiguous	2	1	Bra028181		HCD	0.2914	0	1	1	231	8.58125	0	2	0.151135	2	3	990.862	2970.57	-0.0859536	53.2826	29767	29767	MS2	45/96	20130120_Brassica_A6.raw
	High	KFETLSYLPDLTEVELGK	Unambiguous	2	1	Bra028181		HCD	0.2516	0	1	1	271	7.62949	0	1	0	19	2	1041.55	2082.1	-0.336288	45.6787	25478	25478	MS2	30/34	20130120_Brassica_A2.raw
	High	KKFETLSYLPDLTEVELGK	Unambiguous	2	1	Bra028181		HCD	0.2795	0	1	1	170	7.61941	0	2	0	7	2	1105.6	2210.19	-0.758325	42.4804	23699	23699	MS2	31/36	20130120_Brassica_A6.raw
	High	KFETLSYLPDLTEVELGKEVDYLLR	Unambiguous	2	1	Bra028181		HCD	0.1397	0	1	1	206	7.58663	0	2	7.89202	40	2	1485.78	2970.56	-4.70444	53.4275	29849	29849	MS2	31/48	20130120_Brassica_A6.raw
	High	KFETLSYLPDLTEVELGK	Unambiguous	2	1	Bra028181		HCD	0.2735	0	1	1	258	7.12815	0	1	1.1949	50	2	1041.55	2082.1	0.953537	45.4027	25369	25369	MS2	30/34	20130120_Brassica_A5.raw
	High	KFETLSYLPDLTEVELGKEVDYLLR	Unambiguous	2	1	Bra028181		HCD	0.1652	0	1	1	167	6.60095	0	2	6.28791	24	2	1485.79	2970.58	1.78831	53.2981	29776	29776	MS2	31/48	20130120_Brassica_A6.raw
	High	LPLFGcTDSAQVLK	Unambiguous	5	2	Bra028181 ;Bra028406	C6(Carbamidomethyl)	HCD	0.58	0	1	1	383	6.31053	0	0	0	50	1	1548.81	1548.81	-0.0214738	39.7338	22145	22145	MS2	23/26	20130120_Brassica_A6.raw
	High	KFETLSYLPDLTEVELGKEVDYLLR	Unambiguous	2	1	Bra028181		HCD	0.3281	0	1	1	245	5.73264	0	2	1.18678	10	4	743.397	2970.57	-1.05617	53.5351	29909	29909	MS2	35/144	20130120_Brassica_A6.raw
	High	KFETLSYLPDLTEVELGK	Unambiguous	2	1	Bra028181		HCD	0.2182	0	1	1	271	5.72751	0	1	0	1	2	1041.55	2082.1	-1.03983	45.6566	25490	25490	MS2	27/34	20130120_Brassica_A6.raw
	High	FETLSYLPDLTEVELGKEVDYLLR	Unambiguous	2	1	Bra028181		HCD	0.2059	0	1	1	258	5.72698	0	1	0	40	2	1421.74	2842.47	-1.30928	55.8949	31233	31233	MS2	23/46	20130120_Brassica_A6.raw
	High	FETLSYLPDLTEVELGKEVDYLLR	Unambiguous	2	1	Bra028181		HCD	0.1836	0	1	1	314	5.72056	0	1	0	14	3	948.163	2842.47	-0.583943	56.0374	31313	31313	MS2	30/92	20130120_Brassica_A6.raw
	High	KFETLSYLPDLTEVELGKEVDYLLR	Unambiguous	2	1	Bra028181		HCD	0.3233	0	1	1	196	5.66276	0	2	81.0584	2	4	743.401	2970.58	3.21751	53.2801	29765	29765	MS2	33/144	20130120_Brassica_A6.raw
	High	FETLSYLPDLTEVELGKEVDYLLR	Unambiguous	2	1	Bra028181		HCD	0.2057	0	1	1	252	5.64326	0	1	1.17818	21	2	1421.74	2842.47	-0.622158	55.9736	31277	31277	MS2	24/46	20130120_Brassica_A6.raw
	High	KFETLSYLPDLTEVELGK	Unambiguous	2	1	Bra028181		HCD	0.2522	0	1	1	268	5.58669	0	1	0	8	2	1041.55	2082.1	0.132739	45.9098	25634	25634	MS2	27/34	20130120_Brassica_A6.raw
	High	FETLSYLPDLTEVELGKEVDYLLR	Unambiguous	2	1	Bra028181		HCD	0.1775	0	1	1	202	5.51537	0	1	0	50	2	1421.75	2842.49	6.24901	55.7932	31285	31285	MS2	22/46	20130120_Brassica_A3.raw
	High	LPLFGcTDSAQVLK	Unambiguous	5	2	Bra028181 ;Bra028406	C6(Carbamidomethyl)	HCD	1	0	1	1	341	5.50002	0	0	0	50	1	1548.81	1548.81	-1.12489	39.9852	22276	22276	MS2	24/26	20130120_Brassica_A2.raw
	High	KFETLSYLPDLTEVELGKEVDYLLR	Unambiguous	2	1	Bra028181		HCD	0.3621	0	1	1	236	5.33094	0	2	0	21	4	743.398	2970.57	-0.316493	53.2771	29759	29759	MS2	33/144	20130120_Brassica_A4.raw
	High	KFETLSYLPDLTEVELGK	Unambiguous	2	1	Bra028181		HCD	0.219	0	1	1	266	5.24946	0	1	0	23	2	1041.55	2082.1	-0.219031	45.4698	25427	25427	MS2	24/34	20130120_Brassica_A1.raw
	High	LPLFGcTDSAQVLK	Unambiguous	5	2	Bra028181 ;Bra028406	C6(Carbamidomethyl)	HCD	1	0	1	1	369	5.1209	0	0	16.3266	50	1	1548.81	1548.81	-0.573183	40.097	22369	22369	MS2	22/26	20130120_Brassica_A4.raw
	High	LPLFGcTDSAQVLK	Unambiguous	5	2	Bra028181 ;Bra028406	C6(Carbamidomethyl)	HCD	1	0	1	1	389	5.06921	0	0	12.9959	3	1	1548.81	1548.81	-2.1495	39.9975	22297	22297	MS2	22/26	20130120_Brassica_A6.raw
	High	KFETLSYLPDLTEVELGKEVDYLLR	Unambiguous	2	1	Bra028181		HCD	0.3527	0	1	1	223	4.98632	0	2	8.21479	50	4	743.399	2970.57	0.916303	53.3523	29629	29629	MS2	35/144	20130120_Brassica_A7.raw
	High	KKFETLSYLPDLTEVELGK	Selected	2	1	Bra028181		HCD		0.0284	3	3	176	4.7893	0	2	9.36342	50	2	1105.6	2210.19	-0.758325	42.0681	23514	23514	MS2	22/36	20130120_Brassica_A1.raw
	High	FETLSYLPDLTEVELGK	Selected	2	1	Bra028181		HCD		0.0343	3	3	297	4.78838	0	0	12.8416	50	1	1954	1954	-3.69407	48.4507	27059	27059	MS2	19/32	20130120_Brassica_A6.raw
	High	LPLFGcTDSAQVLK	Unambiguous	5	2	Bra028181 ;Bra028406	C6(Carbamidomethyl)	HCD	1	0	1	1	397	4.77499	0	0	26.9255	27	2	774.906	1548.8	-2.67049	39.6737	22111	22111	MS2	22/26	20130120_Brassica_A6.raw
	High	KKFETLSYLPDLTEVELGK	Unambiguous	2	1	Bra028181		HCD	0.1513	0	1	1	198	4.75689	0	2	7.08805	50	3	737.404	2210.2	1.4172	91.8805	51452	51452	MS2	26/72	20130120_Brassica_A6.raw
	High	LPLFGcTDSAQVLK	Unambiguous	5	2	Bra028181 ;Bra028406	C6(Carbamidomethyl)	HCD	1	0	1	1	392	4.74116	0	0	0	20	2	774.908	1548.81	-0.227195	83.8523	46964	46964	MS2	24/26	20130120_Brassica_A6.raw
	High	WIPcVEFELEHGFVYR	Unambiguous	4	3	Bra025431 ;Bra028181 ;Bra028406	C4(Carbamidomethyl)	HCD	1	0	1	1	378	4.7285	0	0	5.90998	50	3	694.336	2080.99	-1.20062	91.3295	51145	51145	MS2	28/60	20130120_Brassica_A6.raw
	High	KFETLSYLPDLTEVELGKEVDYLLR	Unambiguous	2	1	Bra028181		HCD	0.3176	0	1	1	231	4.66095	0	2		6	3	990.862	2970.57	-0.0110931	53.1414	29806	29806	MS2	27/96	20130120_Brassica_A3.raw
	High	KFETLSYLPDLTEVELGK	Selected	2	1	Bra028181		HCD	0.0194	0	1	1	282	4.6475	0	1	0	50	2	1041.55	2082.1	0.48451	43.8754	24485	24485	MS2	21/34	20130120_Brassica_A6.raw
	High	LPLFGcTDSAQVLK	Unambiguous	5	2	Bra028181 ;Bra028406	C6(Carbamidomethyl)	HCD	1	0	1	1	386	4.62784	0	0	2.19032	50	2	774.909	1548.81	0.639777	85.3996	47829	47829	MS2	22/26	20130120_Brassica_A6.raw
	High	KKFETLSYLPDLTEVELGK	Selected	2	1	Bra028181		HCD	0.0756	0	1	1	195	4.62708	0	2	3.21235	50	4	553.306	2210.2	3.48225	91.6696	51335	51335	MS2	35/108	20130120_Brassica_A6.raw
	High	LPLFGcTDSAQVLK	Unambiguous	5	2	Bra028181 ;Bra028406	C6(Carbamidomethyl)	HCD	1	0	1	1	382	4.61433	0	0	4.61902	22	2	774.909	1548.81	1.66438	91.6304	51312	51312	MS2	22/26	20130120_Brassica_A6.raw
	High	LPLFGcTDSAQVLK	Unambiguous	5	2	Bra028181 ;Bra028406	C6(Carbamidomethyl)	HCD	1	0	1	1	392	4.60848	0	0	0.974678	19	2	774.908	1548.81	-0.30601	84.3625	47252	47252	MS2	23/26	20130120_Brassica_A6.raw
	High	KKFETLSYLPDLTEVELGK	Unambiguous	2	1	Bra028181		HCD	0.256	0	1	1	162	4.6065	0	2	0	50	2	1105.6	2210.2	1.00905	42.7356	23843	23843	MS2	23/36	20130120_Brassica_A6.raw
	High	LPLFGcTDSAQVLK	Unambiguous	5	2	Bra028181 ;Bra028406	C6(Carbamidomethyl)	HCD	1	0	1	1	401	4.58772	0	0	2.02902	18	2	774.908	1548.81	0.00925227	87.2655	48872	48872	MS2	22/26	20130120_Brassica_A6.raw
	High	WIPcVEFELEHGFVYR	Unambiguous	4	3	Bra025431 ;Bra028181 ;Bra028406	C4(Carbamidomethyl)	HCD	1	0	1	1	353	4.58544	0	0	16.5555	40	3	694.337	2081	0.823141	47.5175	26536	26536	MS2	27/60	20130120_Brassica_A6.raw
	High	LPLFGcTDSAQVLK	Unambiguous	5	2	Bra028181 ;Bra028406	C6(Carbamidomethyl)	HCD	1	0	1	1	387	4.56186	0	0	9.13901	50	2	774.909	1548.81	1.66438	91.7323	51370	51370	MS2	22/26	20130120_Brassica_A6.raw
	High	LPLFGcTDSAQVLK	Unambiguous	5	2	Bra028181 ;Bra028406	C6(Carbamidomethyl)	HCD	1	0	1	1	377	4.54277	0	0	6.41771	21	2	774.909	1548.81	0.955039	42.008	23430	23430	MS2	22/26	20130120_Brassica_A6.raw
	High	LPLFGcTDSAQVLK	Unambiguous	5	2	Bra028181 ;Bra028406	C6(Carbamidomethyl)	HCD	1	0	1	1	381	4.52204	0	0	1.54498	3	2	774.909	1548.81	0.718592	91.371	51167	51167	MS2	22/26	20130120_Brassica_A6.raw
	High	LPLFGcTDSAQVLK	Unambiguous	5	2	Bra028181 ;Bra028406	C6(Carbamidomethyl)	HCD	1	0	1	1	384	4.51538	0	0	5.292	1	2	774.908	1548.81	0.324515	40.4538	22556	22556	MS2	23/26	20130120_Brassica_A6.raw
	High	QVQcISFIAYKPPSFTGA	Unambiguous	3	2	Bra028181 ;Bra028406	C4(Carbamidomethyl)	HCD	1	0	1	1	332	4.51239	0	0	0.444852	2	2	1007.51	2014.01	-0.622886	44.1278	24629	24629	MS2	16/34	20130120_Brassica_A6.raw
	High	KFETLSYLPDLTEVELGKEVDYLLR	Unambiguous	2	1	Bra028181		HCD	0.3156	0	1	1	199	4.50327	0	2		50	4	743.4	2970.58	2.91588	54.085	30217	30217	MS2	30/144	20130120_Brassica_A6.raw
	High	LPLFGcTDSAQVLK	Unambiguous	5	2	Bra028181 ;Bra028406	C6(Carbamidomethyl)	HCD	1	0	1	1	391	4.47778	0	0	1.7952	13	2	774.908	1548.81	0.0880679	87.0075	48728	48728	MS2	22/26	20130120_Brassica_A6.raw
	High	WIPcVEFELEHGFVYR	Unambiguous	4	3	Bra025431 ;Bra028181 ;Bra028406	C4(Carbamidomethyl)	HCD	1	0	1	1	361	4.4697	0	0	1.2185	1	3	694.336	2080.99	-0.672678	47.2329	26377	26377	MS2	25/60	20130120_Brassica_A6.raw
	High	EVQEcKTEYPNAFIR	Unambiguous	4	3	Bra025431 ;Bra028181 ;Bra028406	C5(Carbamidomethyl)	HCD	1	0	1	1	346	4.4685	0	1	0	50	2	942.45	1883.89	-1.1758	31.3585	17431	17431	MS2	21/28	20130120_Brassica_A1.raw
	High	QVQcISFIAYKPPSFTGA	Unambiguous	3	2	Bra028181 ;Bra028406	C4(Carbamidomethyl)	HCD	1	0	1	1	332	4.46799	0	0	0.37294	2	2	1007.51	2014.01	-0.562275	44.2079	24675	24675	MS2	17/34	20130120_Brassica_A6.raw
	High	KKFETLSYLPDLTEVELGK	Unambiguous	2	1	Bra028181		HCD	0.1143	0	1	1	220	4.46054	0	2	0.0613203	1	4	553.304	2210.2	0.168427	42.3264	23611	23611	MS2	34/108	20130120_Brassica_A6.raw
	High	KKFETLSYLPDLTEVELGK	Unambiguous	2	1	Bra028181		HCD	0.2135	0	1	1	198	4.45136	0	2	7.08805	50	3	737.404	2210.2	1.4172	91.8736	51447	51447	MS2	29/72	20130120_Brassica_A6.raw
	High	WIPcVEFELEHGFVYR	Unambiguous	4	3	Bra025431 ;Bra028181 ;Bra028406	C4(Carbamidomethyl)	HCD	1	0	1	1	382	4.44481	0	0	21.7242	38	3	694.335	2080.99	-2.52046	46.9672	26233	26233	MS2	26/60	20130120_Brassica_A4.raw
	High	LPLFGcTDSAQVLK	Unambiguous	5	2	Bra028181 ;Bra028406	C6(Carbamidomethyl)	HCD	1	0	1	1	368	4.44359	0	0	12.9959	3	1	1548.81	1548.81	-2.1495	39.9962	22296	22296	MS2	21/26	20130120_Brassica_A6.raw
	High	LPLFGcTDSAQVLK	Unambiguous	5	2	Bra028181 ;Bra028406	C6(Carbamidomethyl)	HCD	1	0	1	1	394	4.43814	0	0	10.6421	20	2	774.91	1548.81	2.92542	41.7506	23285	23285	MS2	22/26	20130120_Brassica_A6.raw
	High	LPLFGcTDSAQVLK	Unambiguous	5	2	Bra028181 ;Bra028406	C6(Carbamidomethyl)	HCD	1	0	1	1	360	4.42192	0	0	16.246	50	2	774.908	1548.81	-0.700089	87.1934	48833	48833	MS2	21/26	20130120_Brassica_A6.raw
	High	LPLFGcTDSAQVLK	Unambiguous	5	2	Bra028181 ;Bra028406	C6(Carbamidomethyl)	HCD	1	0	1	1	367	4.41416	0	0	0	25	2	774.907	1548.81	-1.09417	84.108	47108	47108	MS2	22/26	20130120_Brassica_A6.raw
	High	EVQEcKTEYPNAFIR	Unambiguous	4	3	Bra025431 ;Bra028181 ;Bra028406	C5(Carbamidomethyl)	HCD	1	0	1	1	316	4.40647	0	1	9.88074	4	2	942.451	1883.89	-0.398239	31.5203	17472	17472	MS2	20/28	20130120_Brassica_A6.raw
	High	LPLFGcTDSAQVLK	Unambiguous	5	2	Bra028181 ;Bra028406	C6(Carbamidomethyl)	HCD	1	0	1	1	378	4.40395	0	0	54.8385	27	2	774.909	1548.81	0.560961	87.7801	49160	49160	MS2	23/26	20130120_Brassica_A6.raw
	High	LPLFGcTDSAQVLK	Unambiguous	5	2	Bra028181 ;Bra028406	C6(Carbamidomethyl)	HCD	1	0	1	1	381	4.40151	0	0	4.46402	11	2	774.91	1548.81	2.21608	41.4927	23141	23141	MS2	22/26	20130120_Brassica_A6.raw
	High	LPLFGcTDSAQVLK	Unambiguous	5	2	Bra028181 ;Bra028406	C6(Carbamidomethyl)	HCD	1	0	1	1	391	4.39896	0	0	8.42186	50	2	774.909	1548.81	0.482146	92.0249	51533	51533	MS2	21/26	20130120_Brassica_A6.raw
	High	LPLFGcTDSAQVLK	Unambiguous	5	2	Bra028181 ;Bra028406	C6(Carbamidomethyl)	HCD	1	0	1	1	356	4.38186	0	0	0	50	1	1548.81	1548.81	1.16076	39.725	22168	22168	MS2	22/26	20130120_Brassica_A5.raw
	High	LPLFGcTDSAQVLK	Unambiguous	5	2	Bra028181 ;Bra028406	C6(Carbamidomethyl)	HCD	1	0	1	1	397	4.36876	0	0	2.25335	19	2	774.908	1548.81	-0.0695633	86.7498	48584	48584	MS2	23/26	20130120_Brassica_A6.raw
	High	LPLFGcTDSAQVLK	Unambiguous	5	2	Bra028181 ;Bra028406	C6(Carbamidomethyl)	HCD	1	0	1	1	399	4.34583	0	0	9.57675	50	2	774.908	1548.81	-0.227195	91.8884	51455	51455	MS2	21/26	20130120_Brassica_A6.raw
	High	LPLFGcTDSAQVLK	Unambiguous	5	2	Bra028181 ;Bra028406	C6(Carbamidomethyl)	HCD	1	0	1	1	385	4.34531	0	0	0.904242	36	2	774.908	1548.81	-0.463642	85.6731	47982	47982	MS2	22/26	20130120_Brassica_A6.raw
	High	LPLFGcTDSAQVLK	Unambiguous	5	2	Bra028181 ;Bra028406	C6(Carbamidomethyl)	HCD	1	0	1	1	359	4.34137	0	0	0.617725	23	2	774.907	1548.81	-0.936536	84.6206	47396	47396	MS2	21/26	20130120_Brassica_A6.raw
	High	LPLFGcTDSAQVLK	Unambiguous	5	2	Bra028181 ;Bra028406	C6(Carbamidomethyl)	HCD	1	0	1	1	378	4.33884	0	0	0	23	2	774.907	1548.81	-1.56706	83.5957	46820	46820	MS2	21/26	20130120_Brassica_A6.raw
	High	LPLFGcTDSAQVLK	Unambiguous	5	2	Bra028181 ;Bra028406	C6(Carbamidomethyl)	HCD	1	0	1	1	398	4.33305	0	0	4.69177	50	2	774.908	1548.81	-0.227195	85.9454	48134	48134	MS2	21/26	20130120_Brassica_A6.raw
	High	LPLFGcTDSAQVLK	Unambiguous	5	2	Bra028181 ;Bra028406	C6(Carbamidomethyl)	HCD	1	0	1	1	380	4.32107	0	0	6.55301	50	2	774.908	1548.81	0.166883	92.2976	51684	51684	MS2	22/26	20130120_Brassica_A6.raw
	High	LPLFGcTDSAQVLK	Unambiguous	5	2	Bra028181 ;Bra028406	C6(Carbamidomethyl)	HCD	1	0	1	1	396	4.31979	0	0	6.1433	41	2	774.908	1548.81	-0.227195	86.2044	48279	48279	MS2	23/26	20130120_Brassica_A6.raw
	High	KFETLSYLPDLTEVELGK	Unambiguous	2	1	Bra028181		HCD	0.1439	0	1	1	294	4.30946	0	1	0.220683	3	3	694.705	2082.1	0.302167	45.5621	25437	25437	MS2	26/68	20130120_Brassica_A6.raw
	High	KFETLSYLPDLTEVELGKEVDYLLR	Unambiguous	2	1	Bra028181		HCD	0.2947	0	1	1	244	4.30522	0	2	7.94903	50	4	743.398	2970.57	-0.809612	53.1484	29700	29700	MS2	31/144	20130120_Brassica_A5.raw
	High	QVQcISFIAYKPPSFTGA	Unambiguous	3	2	Bra028181 ;Bra028406	C4(Carbamidomethyl)	HCD	1	0	1	1	324	4.2981	0	0	1.05161	6	2	1007.51	2014.01	-0.562275	44.2884	24721	24721	MS2	15/34	20130120_Brassica_A6.raw
	High	QVQcISFIAYKPPSFTGA	Unambiguous	3	2	Bra028181 ;Bra028406	C4(Carbamidomethyl)	HCD	1	0	1	1	355	4.29524	0	0	0	2	2	1007.51	2014.01	-0.98655	43.9828	24545	24545	MS2	18/34	20130120_Brassica_A6.raw
	High	QVQcISFIAYKPPSFTGA	Unambiguous	3	2	Bra028181 ;Bra028406	C4(Carbamidomethyl)	HCD	1	0	1	1	329	4.28984	0	0	0	4	2	1007.51	2014.01	-0.198612	44.0571	24613	24613	MS2	16/34	20130120_Brassica_A5.raw
	High	FETLSYLPDLTEVELGK	Selected	2	1	Bra028181		HCD		0.036	3	3	297	4.27931	0	0	0.787195	2	2	977.506	1954	-0.920941	48.4373	27052	27052	MS2	15/32	20130120_Brassica_A6.raw
	High	KFETLSYLPDLTEVELGKEVDYLLR	Unambiguous	2	1	Bra028181		HCD	0.3021	0	1	1	195	4.26515	0	2	83.4702	50	3	990.865	2970.58	3.4275	53.4032	29829	29829	MS2	27/96	20130120_Brassica_A4.raw
	High	FETLSYLPDLTEVELGKEVDYLLR	Unambiguous	2	1	Bra028181		HCD	0.2136	0	1	1	316	4.25997	0	1	11.1057	50	3	948.164	2842.48	0.189068	55.5198	31023	31023	MS2	24/92	20130120_Brassica_A6.raw
	High	LPLFGcTDSAQVLK	Unambiguous	5	2	Bra028181 ;Bra028406	C6(Carbamidomethyl)	HCD	1	0	1	1	405	4.25676	0	0	8.09217	50	2	774.908	1548.81	0.00925227	92.1486	51600	51600	MS2	21/26	20130120_Brassica_A6.raw
	High	LPLFGcTDSAQVLK	Unambiguous	5	2	Bra028181 ;Bra028406	C6(Carbamidomethyl)	HCD	1	0	1	1	394	4.24291	0	0	3.70813	6	2	774.908	1548.81	-0.30601	40.9808	22853	22853	MS2	19/26	20130120_Brassica_A6.raw
	High	FETLSYLPDLTEVELGK	Selected	2	1	Bra028181		HCD		0.0724	3	3	295	4.23248	0	0	0.787195	2	2	977.506	1954	-0.920941	48.4361	27051	27051	MS2	15/32	20130120_Brassica_A6.raw
	High	FETLSYLPDLTEVELGK	Unambiguous	2	1	Bra028181		HCD	0.1678	0	1	1	310	4.22824	0	0	0	28	2	977.506	1954	-0.546109	48.6055	26961	26961	MS2	18/32	20130120_Brassica_A7.raw
	High	LPLFGcTDSAQVLK	Unambiguous	5	2	Bra028181 ;Bra028406	C6(Carbamidomethyl)	HCD	1	0	1	1	375	4.22228	0	0	4.61159	50	2	774.908	1548.81	0.245699	86.8026	48614	48614	MS2	20/26	20130120_Brassica_A6.raw
	High	LPLFGcTDSAQVLK	Unambiguous	5	2	Bra028181 ;Bra028406	C6(Carbamidomethyl)	HCD	1	0	1	1	359	4.22137	0	0	9.13466	10	2	774.909	1548.81	1.34912	41.2352	22997	22997	MS2	21/26	20130120_Brassica_A6.raw
	High	LPLFGcTDSAQVLK	Unambiguous	5	2	Bra028181 ;Bra028406	C6(Carbamidomethyl)	HCD	1	0	1	1	372	4.21052	0	0	3.74546	22	2	774.909	1548.81	0.40333	86.4778	48432	48432	MS2	23/26	20130120_Brassica_A6.raw
	High	LPLFGcTDSAQVLK	Unambiguous	5	2	Bra028181 ;Bra028406	C6(Carbamidomethyl)	HCD	1	0	1	1	370	4.20851	0	0	2.17168	32	2	774.908	1548.81	-0.621273	84.8785	47540	47540	MS2	20/26	20130120_Brassica_A6.raw
	High	QVQcISFIAYKPPSFTGA	Unambiguous	3	2	Bra028181 ;Bra028406	C4(Carbamidomethyl)	HCD	1	0	1	1	351	4.20654	0	0	2.03149	17	2	1007.51	2014.01	2.10459	43.8426	24604	24604	MS2	16/34	20130120_Brassica_A3.raw
	High	LPLFGcTDSAQVLK	Unambiguous	5	2	Bra028181 ;Bra028406	C6(Carbamidomethyl)	HCD	1	0	1	1	402	4.20254	0	0	0.601021	1	2	774.908	1548.81	-0.148379	40.0069	22289	22289	MS2	22/26	20130120_Brassica_A2.raw
	High	KFETLSYLPDLTEVELGK	Unambiguous	2	1	Bra028181		HCD	0.1381	0	1	1	309	4.19904	0	1	9.35344	50	3	694.706	2082.1	1.18159	91.8574	51438	51438	MS2	28/68	20130120_Brassica_A6.raw
	High	FETLSYLPDLTEVELGK	Unambiguous	2	1	Bra028181		HCD	0.1857	0	1	1	305	4.19534	0	0	0	11	2	977.507	1954.01	0.578384	48.3103	27107	27107	MS2	18/32	20130120_Brassica_A3.raw
	High	LPLFGcTDSAQVLK	Unambiguous	5	2	Bra028181 ;Bra028406	C6(Carbamidomethyl)	HCD	1	0	1	1	380	4.18957	0	0	1.53436	2	2	774.908	1548.81	-0.384826	39.7071	22178	22178	MS2	22/26	20130120_Brassica_A1.raw
	High	QVQcISFIAYKPPSFTGA	Unambiguous	3	2	Bra028181 ;Bra028406	C4(Carbamidomethyl)	HCD	1	0	1	1	351	4.18602	0	0	0	7	2	1007.51	2014.01	0.952988	43.7262	24401	24401	MS2	17/34	20130120_Brassica_A6.raw
	High	KKFETLSYLPDLTEVELGK	Unambiguous	2	1	Bra028181		HCD	0.1914	0	1	1	198	4.18127	0	2	8.53385	50	3	737.405	2210.2	1.58289	92.1717	51614	51614	MS2	26/72	20130120_Brassica_A6.raw
	High	LPLFGcTDSAQVLK	Unambiguous	5	2	Bra028181 ;Bra028406	C6(Carbamidomethyl)	HCD	1	0	1	1	383	4.17477	0	0	0	50	2	774.91	1548.81	2.13727	92.4066	51743	51743	MS2	21/26	20130120_Brassica_A6.raw
	High	LPLFGcTDSAQVLK	Unambiguous	5	2	Bra028181 ;Bra028406	C6(Carbamidomethyl)	HCD	1	0	1	1	398	4.17348	0	0	1.17618	50	2	774.908	1548.81	0.00925227	85.138	47684	47684	MS2	21/26	20130120_Brassica_A6.raw
	High	QVQcISFIAYKPPSFTGA	Unambiguous	3	2	Bra028181 ;Bra028406	C4(Carbamidomethyl)	HCD	1	0	1	1	350	4.14969	0	0	0	13	2	1007.51	2014.01	-0.562275	45.0492	25149	25149	MS2	16/34	20130120_Brassica_A6.raw
	High	KFETLSYLPDLTEVELGK	Unambiguous	2	1	Bra028181		HCD	0.2005	0	1	1	313	4.13535	0	1	11.0541	50	3	694.705	2082.1	0.0383387	92.4757	51782	51782	MS2	26/68	20130120_Brassica_A6.raw
	High	KFETLSYLPDLTEVELGK	Selected	2	1	Bra028181		HCD	0.0944	0	1	1	276	4.13348	0	1	27.4259	40	3	694.708	2082.11	4.08368	91.5175	51249	51249	MS2	22/68	20130120_Brassica_A6.raw
	High	WIPcVEFELEHGFVYR	Unambiguous	4	3	Bra025431 ;Bra028181 ;Bra028406	C4(Carbamidomethyl)	HCD	1	0	1	1	380	4.13342	0	0	29.7236	30	3	694.337	2081	0.207216	46.9608	26223	26223	MS2	25/60	20130120_Brassica_A6.raw
	High	KKFETLSYLPDLTEVELGK	Unambiguous	2	1	Bra028181		HCD	0.138	0	1	1	198	4.13154	0	2	7.08805	50	3	737.404	2210.2	1.4172	91.8819	51453	51453	MS2	25/72	20130120_Brassica_A6.raw
	High	QVQcISFIAYKPPSFTGA	Unambiguous	3	2	Bra028181 ;Bra028406	C4(Carbamidomethyl)	HCD	1	0	1	1	355	4.13058	0	0	0	15	2	1007.51	2014.01	-0.925939	44.4358	24621	24621	MS2	16/34	20130120_Brassica_A7.raw
	High	LPLFGcTDSAQVLK	Unambiguous	5	2	Bra028181 ;Bra028406	C6(Carbamidomethyl)	HCD	1	0	1	1	381	4.08833	0	0	0.195032	41	2	774.908	1548.81	-0.463642	39.8464	22211	22211	MS2	17/26	20130120_Brassica_A6.raw
	High	LPLFGcTDSAQVLK	Unambiguous	5	2	Bra028181 ;Bra028406	C6(Carbamidomethyl)	HCD	1	0	1	1	385	4.07075	0	0	1.81944	0	2	774.908	1548.81	-0.542457	40.199	22412	22412	MS2	20/26	20130120_Brassica_A6.raw
	High	WIPcVEFELEHGFVYR	Unambiguous	4	3	Bra025431 ;Bra028181 ;Bra028406	C4(Carbamidomethyl)	HCD	1	0	1	1	378	4.0627	0	0	7.49462	40	3	694.336	2080.99	-0.144741	47.3477	26442	26442	MS2	26/60	20130120_Brassica_A6.raw
	High	FETLSYLPDLTEVELGK	Unambiguous	2	1	Bra028181		HCD	0.1531	0	1	1	308	4.05215	0	0	3.50996	50	2	977.507	1954.01	0.765799	48.8128	27262	27262	MS2	17/32	20130120_Brassica_A4.raw
	High	QVQcISFIAYKPPSFTGA	Unambiguous	3	2	Bra028181 ;Bra028406	C4(Carbamidomethyl)	HCD	1	0	1	1	321	4.0516	0	0	0	17	2	1007.51	2014.01	1.86214	91.4837	51230	51230	MS2	16/34	20130120_Brassica_A6.raw
	High	KKFETLSYLPDLTEVELGK	Unambiguous	2	1	Bra028181		HCD	0.1037	0	1	1	210	4.05126	0	2	6.55301	30	3	737.403	2210.2	0.0916654	91.8896	51456	51456	MS2	24/72	20130120_Brassica_A6.raw
	High	LPLFGcTDSAQVLK	Unambiguous	5	2	Bra028181 ;Bra028406	C6(Carbamidomethyl)	HCD	1	0	1	1	385	4.04749	0	0	0.502086	0	2	774.909	1548.81	0.718592	39.9326	22259	22259	MS2	21/26	20130120_Brassica_A6.raw
	High	KKFETLSYLPDLTEVELGK	Unambiguous	2	1	Bra028181		HCD	0.158	0	1	1	134	4.04671	0	2	17.7466	50	2	1105.6	2210.2	3.1078	42.3432	23640	23640	MS2	19/36	20130120_Brassica_A4.raw
	High	KKFETLSYLPDLTEVELGK	Unambiguous	2	1	Bra028181		HCD	0.146	0	1	1	221	4.03927	0	2	1.44028	50	4	553.305	2210.2	0.610271	91.9394	51484	51484	MS2	32/108	20130120_Brassica_A6.raw
	High	QVQcISFIAYKPPSFTGA	Unambiguous	3	2	Bra028181 ;Bra028406	C4(Carbamidomethyl)	HCD	1	0	1	1	322	4.03581	0	0	0.92657	32	2	1007.51	2014.01	1.13482	42.9608	23969	23969	MS2	15/34	20130120_Brassica_A6.raw
	High	LPLFGcTDSAQVLK	Unambiguous	5	2	Bra028181 ;Bra028406	C6(Carbamidomethyl)	HCD	1	0	1	1	387	4.02937	0	0	12.9959	3	1	1548.81	1548.81	-2.1495	39.9949	22295	22295	MS2	20/26	20130120_Brassica_A6.raw
	High	KFETLSYLPDLTEVELGK	Unambiguous	2	1	Bra028181		HCD	0.1269	0	1	1	314	4.01825	0	1	15.3429	50	3	694.705	2082.1	-0.225489	92.0487	51545	51545	MS2	25/68	20130120_Brassica_A6.raw
	High	QVQcISFIAYKPPSFTGA	Unambiguous	3	2	Bra028181 ;Bra028406	C4(Carbamidomethyl)	HCD	1	0	1	1	314	3.99882	0	0	0	9	2	1007.51	2014.01	-0.865329	43.4715	24257	24257	MS2	16/34	20130120_Brassica_A6.raw
	High	QVQcISFIAYKPPSFTGA	Unambiguous	3	2	Bra028181 ;Bra028406	C4(Carbamidomethyl)	HCD	1	0	1	1	317	3.99801	0	0	6.1768	50	2	1007.51	2014.01	0.346883	45.3212	25301	25301	MS2	15/34	20130120_Brassica_A6.raw
	High	LPLFGcTDSAQVLK	Unambiguous	5	2	Bra028181 ;Bra028406	C6(Carbamidomethyl)	HCD	1	0	1	1	378	3.9862	0	0	0.502744	1	2	774.908	1548.81	-0.463642	40.3097	22308	22308	MS2	18/26	20130120_Brassica_A7.raw
	High	KKFETLSYLPDLTEVELGK	Selected	2	1	Bra028181		HCD		0.0478	3	3	216	3.98293	0	2	7.93627	40	4	553.304	2210.19	-0.604801	42.0563	23457	23457	MS2	31/108	20130120_Brassica_A6.raw
	High	KFETLSYLPDLTEVELGK	Unambiguous	2	1	Bra028181		HCD	0.201	0	1	1	304	3.98143	0	1	7.03737	28	3	694.704	2082.1	-0.841089	45.8786	25591	25591	MS2	24/68	20130120_Brassica_A2.raw
	High	KKFETLSYLPDLTEVELGK	Unambiguous	2	1	Bra028181		HCD	0.2085	0	1	1	197	3.98105	0	2	6.96992	50	4	553.305	2210.2	1.60442	42.8314	23721	23721	MS2	30/108	20130120_Brassica_A7.raw
	High	LPLFGcTDSAQVLK	Unambiguous	5	2	Bra028181 ;Bra028406	C6(Carbamidomethyl)	HCD	1	0	1	1	395	3.97261	0	0	4.97257	50	2	774.908	1548.81	0.00925227	88.0338	49304	49304	MS2	21/26	20130120_Brassica_A6.raw
	High	FETLSYLPDLTEVELGKEVDYLLR	Unambiguous	2	1	Bra028181		HCD	0.2695	0	1	1	310	3.9677	0	1		50	3	948.164	2842.48	0.797639	56.0162	31294	31294	MS2	26/92	20130120_Brassica_A4.raw
	High	LPLFGcTDSAQVLK	Unambiguous	5	2	Bra028181 ;Bra028406	C6(Carbamidomethyl)	HCD	1	0	1	1	396	3.96249	0	0	12.338	50	2	774.908	1548.81	-0.0695633	87.7352	49135	49135	MS2	21/26	20130120_Brassica_A6.raw
	High	LPLFGcTDSAQVLK	Unambiguous	5	2	Bra028181 ;Bra028406	C6(Carbamidomethyl)	HCD	1	0	1	1	400	3.95726	0	0	35.1883	50	2	774.911	1548.81	3.00424	39.9119	22265	22265	MS2	18/26	20130120_Brassica_A4.raw
	High	KKFETLSYLPDLTEVELGK	Selected	2	1	Bra028181		HCD	0.053	0	1	1	195	3.95535	0	2	30.3451	28	3	737.405	2210.2	1.83142	42.0522	23505	23505	MS2	28/72	20130120_Brassica_A1.raw
	High	QVQcISFIAYKPPSFTGA	Unambiguous	3	2	Bra028181 ;Bra028406	C4(Carbamidomethyl)	HCD	1	0	1	1	331	3.95215	0	0	0.0932679	1	2	1007.51	2014.01	0.649936	44.5203	24851	24851	MS2	15/34	20130120_Brassica_A6.raw
	High	FETLSYLPDLTEVELGK	Unambiguous	2	1	Bra028181		HCD	0.1777	0	1	1	302	3.93926	0	0	0.94843	3	2	977.506	1954.01	-0.0463342	48.7444	27225	27225	MS2	17/32	20130120_Brassica_A6.raw
	High	LPLFGcTDSAQVLK	Unambiguous	5	2	Bra028181 ;Bra028406	C6(Carbamidomethyl)	HCD	1	0	1	1	329	3.92962	0	0	0	50	1	1548.81	1548.81	0.136157	39.3651	22060	22060	MS2	19/26	20130120_Brassica_A3.raw
	High	LPLFGcTDSAQVLK	Unambiguous	5	2	Bra028181 ;Bra028406	C6(Carbamidomethyl)	HCD	1	0	1	1	390	3.92083	0	0	0	28	2	774.907	1548.81	-1.88233	83.3284	46667	46667	MS2	21/26	20130120_Brassica_A6.raw
	High	QVQcISFIAYKPPSFTGA	Unambiguous	3	2	Bra028181 ;Bra028406	C4(Carbamidomethyl)	HCD	1	0	1	1	320	3.91357	0	0	0	14	2	1007.51	2014.01	-0.441054	44.2312	24667	24667	MS2	15/34	20130120_Brassica_A2.raw
	High	LPLFGcTDSAQVLK	Unambiguous	5	2	Bra028181 ;Bra028406	C6(Carbamidomethyl)	HCD	1	0	1	1	404	3.88362	0	0	0	13	3	516.94	1548.81	-1.77278	39.7683	22166	22166	MS2	19/52	20130120_Brassica_A6.raw
	High	LPLFGcTDSAQVLKEVQEcK	Unambiguous	5	2	Bra028181 ;Bra028406	C6(Carbamidomethyl); C19(Carbamidomethyl)	HCD	1	0	1	1	410	3.8802	0	1	86.8881	18	3	774.719	2322.14	-2.57304	42.3019	23598	23598	MS2	24/76	20130120_Brassica_A6.raw
	High	QVQcISFIAYKPPSFTGA	Unambiguous	3	2	Bra028181 ;Bra028406	C4(Carbamidomethyl)	HCD	1	0	1	1	309	3.87336	0	0	0	50	2	1007.51	2014.01	-1.47144	83.3752	46694	46694	MS2	15/34	20130120_Brassica_A6.raw
	High	QVQcISFIAYKPPSFTGA	Unambiguous	3	2	Bra028181 ;Bra028406	C4(Carbamidomethyl)	HCD	1	0	1	1	317	3.85231	0	0	0	0	2	1007.51	2014.01	-0.0773905	44.2513	24699	24699	MS2	16/34	20130120_Brassica_A6.raw
	High	QVQcISFIAYKPPSFTGA	Unambiguous	3	2	Bra028181 ;Bra028406	C4(Carbamidomethyl)	HCD	1	0	1	1	319	3.84618	0	0	0.615219	6	2	1007.51	2014.01	0.952988	44.7773	24995	24995	MS2	16/34	20130120_Brassica_A6.raw
	High	KFETLSYLPDLTEVELGK	Unambiguous	2	1	Bra028181		HCD	0.1354	0	1	1	301	3.83958	0	1	10.6162	44	3	694.706	2082.1	0.917764	91.79	51401	51401	MS2	23/68	20130120_Brassica_A6.raw
	High	KKFETLSYLPDLTEVELGK	Unambiguous	2	1	Bra028181		HCD	1	0	1	1	224	3.82305	0	2	18.136	50	4	553.303	2210.19	-1.81988	42.3168	23654	23654	MS2	30/108	20130120_Brassica_A1.raw
	High	QVQcISFIAYKPPSFTGA	Unambiguous	3	2	Bra028181 ;Bra028406	C4(Carbamidomethyl)	HCD	1	0	1	1	333	3.82304	0	0	0	21	2	1007.51	2014.01	0.589325	87.0396	48746	48746	MS2	15/34	20130120_Brassica_A6.raw
	High	KKFETLSYLPDLTEVELGK	Unambiguous	2	1	Bra028181		HCD	0.1257	0	1	1	215	3.82252	0	2	3.37226	33	3	737.403	2210.2	-0.239718	42.719	23658	23658	MS2	25/72	20130120_Brassica_A7.raw
	High	KFETLSYLPDLTEVELGK	Unambiguous	2	1	Bra028181		HCD	0.2173	0	1	1	308	3.81994	0	1	37.9156	50	3	694.705	2082.1	-0.753146	45.6307	25517	25517	MS2	23/68	20130120_Brassica_A1.raw
	High	QVQcISFIAYKPPSFTGA	Unambiguous	3	2	Bra028181 ;Bra028406	C4(Carbamidomethyl)	HCD	1	0	1	1	305	3.81989	0	0	0	4	2	1007.51	2014.01	-0.0773905	44.2115	24689	24689	MS2	16/34	20130120_Brassica_A4.raw
	High	FETLSYLPDLTEVELGKEVDYLLR	Unambiguous	2	1	Bra028181		HCD	0.231	0	1	1	275	3.80817	0	1		50	3	948.168	2842.49	4.21808	55.7599	31150	31150	MS2	22/92	20130120_Brassica_A4.raw
	High	WIPcVEFELEHGFVYR	Unambiguous	4	3	Bra025431 ;Bra028181 ;Bra028406	C4(Carbamidomethyl)	HCD	1	0	1	1	351	3.80334	0	0	13.6772	50	2	1041	2080.99	-2.514	46.9753	26231	26231	MS2	16/30	20130120_Brassica_A6.raw
	High	QVQcISFIAYKPPSFTGA	Unambiguous	3	2	Bra028181 ;Bra028406	C4(Carbamidomethyl)	HCD	1	0	1	1	344	3.80134	0	0	0	50	2	1007.51	2014.01	2.04398	46.6339	26039	26039	MS2	16/34	20130120_Brassica_A6.raw
	High	LPLFGcTDSAQVLK	Unambiguous	5	2	Bra028181 ;Bra028406	C6(Carbamidomethyl)	HCD	1	0	1	1	355	3.79689	0	0	3.60011	6	2	774.909	1548.81	1.19148	40.7114	22701	22701	MS2	19/26	20130120_Brassica_A6.raw
	High	KKFETLSYLPDLTEVELGK	Unambiguous	2	1	Bra028181		HCD	0.1053	0	1	1	220	3.79525	0	2	20.6469	50	4	553.305	2210.2	0.49981	41.0459	22890	22890	MS2	31/108	20130120_Brassica_A6.raw
	High	IIGFDNNRQVQcISFIAYKPPSFTGA	Unambiguous	3	2	Bra028181 ;Bra028406	C12(Carbamidomethyl)	HCD	1	0	1	1	405	3.79121	0	1	14.482	50	3	981.834	2943.49	2.16964	45.9437	25653	25653	MS2	25/100	20130120_Brassica_A6.raw
	High	KFETLSYLPDLTEVELGK	Unambiguous	2	1	Bra028181		HCD	0.1141	0	1	1	305	3.77328	0	1	9.96914	50	3	694.706	2082.1	1.53336	91.7337	51371	51371	MS2	25/68	20130120_Brassica_A6.raw
	High	KFETLSYLPDLTEVELGK	Unambiguous	2	1	Bra028181		HCD	0.2149	0	1	1	313	3.77293	0	1	4.29205	7	3	694.705	2082.1	-0.57726	45.5124	25418	25418	MS2	23/68	20130120_Brassica_A4.raw
	High	EVQEcKTEYPNAFIR	Unambiguous	4	3	Bra025431 ;Bra028181 ;Bra028406	C5(Carbamidomethyl)	HCD	1	0	1	1	367	3.76915	0	1	35.5882	20	3	628.636	1883.89	-0.53497	31.4398	17456	17456	MS2	20/56	20130120_Brassica_A5.raw
	High	EVQEcKTEYPNAFIR	Unambiguous	4	3	Bra025431 ;Bra028181 ;Bra028406	C5(Carbamidomethyl)	HCD	1	0	1	1	345	3.76646	0	1	0	50	2	942.456	1883.9	4.91507	31.4216	17445	17445	MS2	19/28	20130120_Brassica_A5.raw
	High	KFETLSYLPDLTEVELGK	Unambiguous	2	1	Bra028181		HCD	0.2387	0	1	1	314	3.76628	0	1	13.7582	50	3	694.705	2082.1	-0.313432	45.5696	25464	25464	MS2	20/68	20130120_Brassica_A5.raw
	High	FETLSYLPDLTEVELGK	Unambiguous	2	1	Bra028181		HCD	0.1782	0	1	1	291	3.76432	0	0	1.19833	16	2	977.506	1954.01	-0.296222	48.5549	27118	27118	MS2	17/32	20130120_Brassica_A4.raw
	High	WIPcVEFELEHGFVYR	Unambiguous	4	3	Bra025431 ;Bra028181 ;Bra028406	C4(Carbamidomethyl)	HCD	1	0	1	1	396	3.76302	0	0	83.5434	50	3	694.333	2080.99	-4.72021	46.4982	25964	25964	MS2	24/60	20130120_Brassica_A6.raw
	High	FETLSYLPDLTEVELGKEVDYLLR	Unambiguous	2	1	Bra028181		HCD	0.2686	0	1	1	314	3.75536	0	1	0.125162	3	3	948.164	2842.48	0.446739	55.8936	31232	31232	MS2	22/92	20130120_Brassica_A6.raw
	High	QVQcISFIAYKPPSFTGA	Unambiguous	3	2	Bra028181 ;Bra028406	C4(Carbamidomethyl)	HCD	1	0	1	1	397	3.75336	0	0	9.60656	32	3	672.01	2014.01	2.27974	87.0262	48739	48739	MS2	19/68	20130120_Brassica_A6.raw
	High	KFETLSYLPDLTEVELGK	Unambiguous	2	1	Bra028181		HCD	0.16	0	1	1	308	3.75179	0	1	27.6193	48	3	694.705	2082.1	-0.753146	46.4767	25951	25951	MS2	22/68	20130120_Brassica_A6.raw
	High	LPLFGcTDSAQVLK	Unambiguous	5	2	Bra028181 ;Bra028406	C6(Carbamidomethyl)	HCD	1	0	1	1	380	3.74063	0	0	1.04791	1	2	774.908	1548.81	0.324515	40.1737	22412	22412	MS2	19/26	20130120_Brassica_A4.raw
	High	KFETLSYLPDLTEVELGK	Unambiguous	2	1	Bra028181		HCD	0.1818	0	1	1	235	3.74056	0	1		50	2	1041.55	2082.1	0.799884	92.0328	51536	51536	MS2	17/34	20130120_Brassica_A6.raw
	High	KFETLSYLPDLTEVELGK	Unambiguous	2	1	Bra028181		HCD	0.1471	0	1	1	304	3.73641	0	1	2.36828	9	3	694.704	2082.1	-0.929031	45.2913	25307	25307	MS2	24/68	20130120_Brassica_A5.raw
	High	NKWIPcVEFELEHGFVYR	Unambiguous	4	3	Bra025431 ;Bra028181 ;Bra028406	C6(Carbamidomethyl)	HCD	1	0	1	1	418	3.73621	0	1	43.9262	50	3	775.048	2323.13	-1.84668	45.4808	25391	25391	MS2	25/68	20130120_Brassica_A6.raw
	High	KFETLSYLPDLTEVELGK	Unambiguous	2	1	Bra028181		HCD	0.1984	0	1	1	303	3.72856	0	1	1.49885	18	3	694.704	2082.1	-1.2808	44.9708	25239	25239	MS2	22/68	20130120_Brassica_A3.raw
	High	KKFETLSYLPDLTEVELGK	Unambiguous	2	1	Bra028181		HCD	0.25	0	1	1	201	3.72074	0	2	8.60704	50	3	737.404	2210.2	1.08581	92.4609	51774	51774	MS2	27/72	20130120_Brassica_A6.raw
	High	EVQEcKTEYPNAFIR	Unambiguous	4	3	Bra025431 ;Bra028181 ;Bra028406	C5(Carbamidomethyl)	HCD	1	0	1	1	347	3.71961	0	1	20.5536	50	2	942.45	1883.89	-1.43499	31.5139	17492	17492	MS2	18/28	20130120_Brassica_A4.raw
	High	QVQcISFIAYKPPSFTGA	Unambiguous	3	2	Bra028181 ;Bra028406	C4(Carbamidomethyl)	HCD	1	0	1	1	384	3.71827	0	0	6.38938	50	3	672.009	2014.01	1.4615	91.3645	51165	51165	MS2	17/68	20130120_Brassica_A6.raw
	High	LPLFGcTDSAQVLK	Unambiguous	5	2	Bra028181 ;Bra028406	C6(Carbamidomethyl)	HCD	1	0	1	1	370	3.71814	0	0	2.12125	25	2	774.908	1548.81	-0.621273	87.5246	49016	49016	MS2	18/26	20130120_Brassica_A6.raw
	High	QVQcISFIAYKPPSFTGA	Unambiguous	3	2	Bra028181 ;Bra028406	C4(Carbamidomethyl)	HCD	1	0	1	1	317	3.71325	0	0	0	50	2	1007.51	2014.01	-0.441054	87.5564	49034	49034	MS2	15/34	20130120_Brassica_A6.raw
	High	KKFETLSYLPDLTEVELGK	Unambiguous	2	1	Bra028181		HCD	0.159	0	1	1	214	3.7122	0	2	9.44195	50	3	737.403	2210.2	-0.156872	92.1527	51603	51603	MS2	25/72	20130120_Brassica_A6.raw
	High	FETLSYLPDLTEVELGK	Unambiguous	2	1	Bra028181		HCD	0.2676	0	1	1	344	3.70461	0	0	21.4613	50	3	652.005	1954	-2.08355	48.5923	27138	27138	MS2	21/64	20130120_Brassica_A6.raw
	High	WIPcVEFELEHGFVYR	Unambiguous	4	3	Bra025431 ;Bra028181 ;Bra028406	C4(Carbamidomethyl)	HCD	1	0	1	1	379	3.70412	0	0	14.4609	30	3	694.336	2080.99	-0.144741	46.6097	26159	26159	MS2	23/60	20130120_Brassica_A3.raw
	High	FETLSYLPDLTEVELGK	Unambiguous	2	1	Bra028181		HCD	0.1811	0	1	1	303	3.70165	0	0	0	1	2	977.506	1954.01	-0.171278	48.703	27200	27200	MS2	19/32	20130120_Brassica_A6.raw
	High	KFETLSYLPDLTEVELGK	Unambiguous	2	1	Bra028181		HCD	0.1378	0	1	1	314	3.6953	0	1	10.4561	50	3	694.705	2082.1	-0.225489	92.0235	51532	51532	MS2	25/68	20130120_Brassica_A6.raw
	High	QVQcISFIAYKPPSFTGA	Unambiguous	3	2	Bra028181 ;Bra028406	C4(Carbamidomethyl)	HCD	1	0	1	1	311	3.67836	0	0	0.669207	5	2	1007.51	2014.01	0.892378	44.4888	24811	24811	MS2	15/34	20130120_Brassica_A2.raw
	High	WIPcVEFELEHGFVYR	Unambiguous	4	3	Bra025431 ;Bra028181 ;Bra028406	C4(Carbamidomethyl)	HCD	1	0	1	1	334	3.67777	0	0	2.38014	7	2	1041	2080.99	-0.871526	47.0415	26269	26269	MS2	16/30	20130120_Brassica_A6.raw
	High	KKFETLSYLPDLTEVELGK	Unambiguous	2	1	Bra028181		HCD	0.2507	0	1	1	118	3.67237	0	2		50	2	1105.6	2210.2	1.51674	42.7672	23685	23685	MS2	19/36	20130120_Brassica_A7.raw
	High	LPLFGcTDSAQVLK	Unambiguous	5	2	Bra028181 ;Bra028406	C6(Carbamidomethyl)	HCD	1	0	1	1	379	3.66847	0	0	0	50	2	774.909	1548.81	1.42793	92.6678	51887	51887	MS2	19/26	20130120_Brassica_A6.raw
	High	KKFETLSYLPDLTEVELGK	Unambiguous	2	1	Bra028181		HCD	0.2044	0	1	1	198	3.6655	0	2	8.32518	30	3	737.404	2210.2	1.08581	42.962	23970	23970	MS2	25/72	20130120_Brassica_A6.raw
	High	KFETLSYLPDLTEVELGKEVDYLLR	Unambiguous	2	1	Bra028181		HCD	1	0	1	1	234	3.66322	0	2	0.576492	32	4	743.398	2970.57	-0.234306	53.0149	29618	29618	MS2	27/144	20130120_Brassica_A6.raw
	High	EVQEcKTEYPNAFIR	Unambiguous	4	3	Bra025431 ;Bra028181 ;Bra028406	C5(Carbamidomethyl)	HCD	1	0	1	1	349	3.6608	0	1	0	50	2	942.453	1883.9	1.99924	31.5569	17498	17498	MS2	17/28	20130120_Brassica_A2.raw
	High	KFETLSYLPDLTEVELGK	Unambiguous	2	1	Bra028181		HCD	0.1148	0	1	1	308	3.65873	0	1	2.97194	4	3	694.704	2082.1	-1.19286	45.6138	25441	25441	MS2	25/68	20130120_Brassica_A2.raw
	High	WIPcVEFELEHGFVYR	Unambiguous	4	3	Bra025431 ;Bra028181 ;Bra028406	C4(Carbamidomethyl)	HCD	1	0	1	1	339	3.65652	0	0	1.16223	6	2	1041	2080.99	-1.10616	47.2421	26381	26381	MS2	16/30	20130120_Brassica_A6.raw
	High	FETLSYLPDLTEVELGK	Unambiguous	2	1	Bra028181		HCD	1	0	1	1	344	3.64809	0	0	21.4613	50	3	652.005	1954	-2.08355	48.5964	27141	27141	MS2	19/64	20130120_Brassica_A6.raw
	High	QVQcISFIAYKPPSFTGA	Unambiguous	3	2	Bra028181 ;Bra028406	C4(Carbamidomethyl)	HCD	1	0	1	1	335	3.64064	0	0	0	26	2	1007.51	2014.01	0.589325	87.2979	48890	48890	MS2	16/34	20130120_Brassica_A6.raw
	High	EVQEcKTEYPNAFIR	Unambiguous	4	3	Bra025431 ;Bra028181 ;Bra028406	C5(Carbamidomethyl)	HCD	1	0	1	1	354	3.6383	0	1	21.5891	42	3	628.636	1883.89	-1.02095	32.2163	17772	17772	MS2	18/56	20130120_Brassica_A7.raw
	High	LPLFGcTDSAQVLK	Unambiguous	5	2	Bra028181 ;Bra028406	C6(Carbamidomethyl)	HCD	1	0	1	1	370	3.63716	0	0	3.99396	50	2	774.908	1548.81	-0.621273	83.0611	46515	46515	MS2	19/26	20130120_Brassica_A6.raw
	High	KFETLSYLPDLTEVELGK	Unambiguous	2	1	Bra028181		HCD	0.1983	0	1	1	314	3.63366	0	1	1.14665	11	3	694.705	2082.1	-0.313432	45.7975	25386	25386	MS2	21/68	20130120_Brassica_A7.raw
	High	LPLFGcTDSAQVLK	Unambiguous	5	2	Bra028181 ;Bra028406	C6(Carbamidomethyl)	HCD	1	0	1	1	387	3.62435	0	0	0	50	2	774.91	1548.81	2.84661	92.57	51834	51834	MS2	18/26	20130120_Brassica_A6.raw
	High	LPLFGcTDSAQVLK	Unambiguous	5	2	Bra028181 ;Bra028406	C6(Carbamidomethyl)	HCD	1	0	1	1	377	3.61298	0	0	2.18334	11	2	774.908	1548.81	-0.542457	40.5661	22452	22452	MS2	18/26	20130120_Brassica_A7.raw
	High	LPLFGcTDSAQVLK	Unambiguous	5	2	Bra028181 ;Bra028406	C6(Carbamidomethyl)	HCD	1	0	1	1	372	3.61203	0	0	79.4622	24	2	774.907	1548.81	-1.09417	42.2858	23589	23589	MS2	18/26	20130120_Brassica_A6.raw
	High	FETLSYLPDLTEVELGKEVDYLLR	Unambiguous	2	1	Bra028181		HCD	0.2591	0	1	1	277	3.59072	0	1		50	3	948.168	2842.49	5.09765	55.6506	31206	31206	MS2	20/92	20130120_Brassica_A3.raw
	High	LPLFGcTDSAQVLK	Unambiguous	5	2	Bra028181 ;Bra028406	C6(Carbamidomethyl)	HCD	1	0	1	1	393	3.57328	0	0	21.5935	23	2	774.909	1548.81	0.876223	40.4444	22564	22564	MS2	19/26	20130120_Brassica_A4.raw
	High	LPLFGcTDSAQVLK	Unambiguous	5	2	Bra028181 ;Bra028406	C6(Carbamidomethyl)	HCD	1	0	1	1	381	3.56996	0	0	8.74599	50	2	774.908	1548.81	-0.463642	40.3502	22499	22499	MS2	17/26	20130120_Brassica_A6.raw
	High	FETLSYLPDLTEVELGK	Selected	2	1	Bra028181		HCD		0.0272	3	3	284	3.56713	0	0	0.692714	0	2	977.51	1954.01	3.76443	48.4464	27056	27056	MS2	15/32	20130120_Brassica_A6.raw
	High	QVQcISFIAYKPPSFTGA	Unambiguous	3	2	Bra028181 ;Bra028406	C4(Carbamidomethyl)	HCD	1	0	1	1	328	3.56327	0	0	2.83722	50	2	1007.51	2014.02	4.22594	84.4109	47279	47279	MS2	15/34	20130120_Brassica_A6.raw
	High	LPLFGcTDSAQVLK	Unambiguous	5	2	Bra028181 ;Bra028406	C6(Carbamidomethyl)	HCD	1	0	1	1	380	3.5547	0	0	11.5389	50	2	774.91	1548.81	2.76779	92.0922	51570	51570	MS2	16/26	20130120_Brassica_A6.raw
	High	QVQcISFIAYKPPSFTGA	Unambiguous	3	2	Bra028181 ;Bra028406	C4(Carbamidomethyl)	HCD	1	0	1	1	318	3.54515	0	0	0	50	2	1007.51	2014.01	0.0438306	87.8122	49178	49178	MS2	15/34	20130120_Brassica_A6.raw
	High	QVQcISFIAYKPPSFTGA	Unambiguous	3	2	Bra028181 ;Bra028406	C4(Carbamidomethyl)	HCD	1	0	1	1	324	3.5428	0	0	0	50	2	1007.51	2014.01	-0.683497	83.6433	46847	46847	MS2	14/34	20130120_Brassica_A6.raw
	High	QVQcISFIAYKPPSFTGA	Unambiguous	3	2	Bra028181 ;Bra028406	C4(Carbamidomethyl)	HCD	1	0	1	1	311	3.54192	0	0	3.16142	50	2	1007.51	2014.01	0.407494	44.7451	24955	24955	MS2	16/34	20130120_Brassica_A2.raw
	High	KFETLSYLPDLTEVELGK	Unambiguous	2	1	Bra028181		HCD	0.209	0	1	1	310	3.53676	0	1	47.8773	50	3	694.705	2082.1	-0.225489	46.669	26059	26059	MS2	24/68	20130120_Brassica_A6.raw
	High	QVQcISFIAYKPPSFTGA	Unambiguous	3	2	Bra028181 ;Bra028406	C4(Carbamidomethyl)	HCD	1	0	1	1	324	3.53672	0	0	0	50	2	1007.51	2014.01	-0.744107	83.9003	46991	46991	MS2	15/34	20130120_Brassica_A6.raw
	High	FETLSYLPDLTEVELGK	Unambiguous	2	1	Bra028181		HCD	0.1473	0	1	1	319	3.52556	0	0	0	50	2	977.509	1954.01	2.63995	52.0986	29102	29102	MS2	15/32	20130120_Brassica_A6.raw
	High	WIPcVEFELEHGFVYR	Unambiguous	4	3	Bra025431 ;Bra028181 ;Bra028406	C4(Carbamidomethyl)	HCD	1	0	1	1	350	3.52244	0	0	23.9147	50	2	1041	2080.99	-2.39668	46.8354	26173	26173	MS2	15/30	20130120_Brassica_A5.raw
	High	QVQcISFIAYKPPSFTGA	Unambiguous	3	2	Bra028181 ;Bra028406	C4(Carbamidomethyl)	HCD	1	0	1	1	383	3.51962	0	0	0	50	3	672.008	2014.01	-0.447731	87.5577	49035	49035	MS2	16/68	20130120_Brassica_A6.raw
	High	KKFETLSYLPDLTEVELGK	Unambiguous	2	1	Bra028181		HCD	0.1829	0	1	1	247	3.49943	0	2	22.2031	33	3	737.399	2210.18	-5.54188	42.3181	23655	23655	MS2	22/72	20130120_Brassica_A1.raw
	High	KFETLSYLPDLTEVELGK	Unambiguous	2	1	Bra028181		HCD	0.2029	0	1	1	289	3.49652	0	1	5.51459	50	3	694.707	2082.11	2.2369	92.5686	51833	51833	MS2	25/68	20130120_Brassica_A6.raw
	High	QVQcISFIAYKPPSFTGA	Unambiguous	3	2	Bra028181 ;Bra028406	C4(Carbamidomethyl)	HCD	1	0	1	1	319	3.46803	0	0	0	49	2	1007.51	2014.01	0.649936	44.6921	24765	24765	MS2	15/34	20130120_Brassica_A7.raw
	High	WIPcVEFELEHGFVYR	Unambiguous	4	3	Bra025431 ;Bra028181 ;Bra028406	C4(Carbamidomethyl)	HCD	1	0	1	1	377	3.4674	0	0	32.53	50	3	694.335	2080.99	-1.90453	46.8715	26215	26215	MS2	21/60	20130120_Brassica_A1.raw
	High	QVQcISFIAYKPPSFTGA	Unambiguous	3	2	Bra028181 ;Bra028406	C4(Carbamidomethyl)	HCD	1	0	1	1	386	3.45161	0	0	4.16666	12	3	672.008	2014.01	-0.720478	44.4998	24657	24657	MS2	17/68	20130120_Brassica_A7.raw
	High	KKFETLSYLPDLTEVELGK	Unambiguous	2	1	Bra028181		HCD	0.1246	0	1	1	203	3.44846	0	2	1.26393	50	4	553.305	2210.2	0.941654	92.2131	51636	51636	MS2	34/108	20130120_Brassica_A6.raw
	High	KKFETLSYLPDLTEVELGK	Unambiguous	2	1	Bra028181		HCD	0.1478	0	1	1	98	3.44519	0	2	4.46968	50	2	1105.6	2210.2	2.77642	91.7135	51359	51359	MS2	16/36	20130120_Brassica_A6.raw
	High	LPLFGcTDSAQVLK	Unambiguous	5	2	Bra028181 ;Bra028406	C6(Carbamidomethyl)	HCD	1	0	1	1	375	3.44489	0	0	0	50	2	774.909	1548.81	0.482146	93.195	52179	52179	MS2	18/26	20130120_Brassica_A6.raw
	High	LPLFGcTDSAQVLK	Unambiguous	5	2	Bra028181 ;Bra028406	C6(Carbamidomethyl)	HCD	1	0	1	1	353	3.44484	0	0	3.32764	2	2	774.909	1548.81	1.34912	39.4579	22111	22111	MS2	17/26	20130120_Brassica_A3.raw
	High	KFETLSYLPDLTEVELGK	Unambiguous	2	1	Bra028181		HCD	0.2209	0	1	1	279	3.43778	0	1	32.7896	50	3	694.708	2082.11	3.99574	91.5764	51398	51398	MS2	19/68	20130120_Brassica_A3.raw
	High	KFETLSYLPDLTEVELGK	Unambiguous	2	1	Bra028181		HCD	0.2012	0	1	1	325	3.42964	0	1	60.1191	50	3	694.704	2082.1	-2.16023	92.8301	51977	51977	MS2	22/68	20130120_Brassica_A6.raw
	High	KKFETLSYLPDLTEVELGK	Unambiguous	2	1	Bra028181		HCD	0.1866	0	1	1	222	3.4255	0	2	13.5692	50	3	737.403	2210.19	-0.985331	41.6395	23358	23358	MS2	22/72	20130120_Brassica_A3.raw
	High	QVQcISFIAYKPPSFTGA	Unambiguous	3	2	Bra028181 ;Bra028406	C4(Carbamidomethyl)	HCD	1	0	1	1	378	3.42454	0	0	8.01499	12	3	672.008	2014.01	-0.174983	44.0826	24629	24629	MS2	16/68	20130120_Brassica_A5.raw
	High	LPLFGcTDSAQVLK	Unambiguous	5	2	Bra028181 ;Bra028406	C6(Carbamidomethyl)	HCD	1	0	1	1	396	3.42286	0	0	29.0394	23	3	516.941	1548.81	0.237017	40.0272	22314	22314	MS2	22/52	20130120_Brassica_A6.raw
	High	KKFETLSYLPDLTEVELGK	Unambiguous	2	1	Bra028181		HCD	1	0	1	1	145	3.42138	0	2	23.0901	50	2	1105.61	2210.21	4.65425	42.1377	23529	23529	MS2	20/36	20130120_Brassica_A5.raw
	High	QVQcISFIAYKPPSFTGA	Unambiguous	3	2	Bra028181 ;Bra028406	C4(Carbamidomethyl)	HCD	1	0	1	1	334	3.42124	0	0	0	50	2	1007.51	2014.01	0.649936	91.7416	51374	51374	MS2	14/34	20130120_Brassica_A6.raw
	High	LPLFGcTDSAQVLK	Unambiguous	5	2	Bra028181 ;Bra028406	C6(Carbamidomethyl)	HCD	1	0	1	1	384	3.41928	0	0	2.78432	1	2	774.908	1548.81	-0.148379	39.8856	22259	22259	MS2	18/26	20130120_Brassica_A5.raw
	High	EVQEcKTEYPNAFIR	Unambiguous	4	3	Bra025431 ;Bra028181 ;Bra028406	C5(Carbamidomethyl)	HCD	1	0	1	1	356	3.41847	0	1	78.9625	9	3	628.636	1883.89	-1.02095	31.8151	17642	17642	MS2	20/56	20130120_Brassica_A6.raw
	High	FETLSYLPDLTEVELGK	Unambiguous	2	1	Bra028181		HCD	0.1349	0	1	1	283	3.41361	0	0	2.48406	50	2	977.509	1954.01	2.70242	49.4769	27633	27633	MS2	14/32	20130120_Brassica_A6.raw
	High	KFETLSYLPDLTEVELGK	Unambiguous	2	1	Bra028181		HCD	0.1818	0	1	1	313	3.41226	0	1	11.9281	50	3	694.705	2082.1	0.126281	92.589	51845	51845	MS2	24/68	20130120_Brassica_A6.raw
	High	EVQECKTEYPNAFIR	Unambiguous	4	3	Bra025431 ;Bra028181 ;Bra028406		HCD	1	0	1	1	363	3.39592	0	1	17.0713	13	3	609.636	1826.89	9.79406	31.1427	17257	17257	MS2	22/56	20130120_Brassica_A6.raw
	High	LPLFGcTDSAQVLK	Unambiguous	5	2	Bra028181 ;Bra028406	C6(Carbamidomethyl)	HCD	1	0	1	1	371	3.39401	0	0	3.51931	50	2	774.909	1548.81	0.876223	92.9281	52031	52031	MS2	17/26	20130120_Brassica_A6.raw
	High	FETLSYLPDLTEVELGK	Unambiguous	2	1	Bra028181		HCD	1	0	1	1	353	3.37852	0	0	3.30441	50	3	652.006	1954	-0.771642	48.8161	27264	27264	MS2	20/64	20130120_Brassica_A6.raw
	High	QVQcISFIAYKPPSFTGA	Unambiguous	3	2	Bra028181 ;Bra028406	C4(Carbamidomethyl)	HCD	1	0	1	1	386	3.37435	0	0	18.6849	49	3	672.008	2014.01	-0.538647	84.1931	47157	47157	MS2	21/68	20130120_Brassica_A6.raw
	High	NKWIPcVEFELEHGFVYR	Unambiguous	4	3	Bra025431 ;Bra028181 ;Bra028406	C6(Carbamidomethyl)	HCD	1	0	1	1	418	3.36403	0	1	50.9391	50	3	775.048	2323.13	-0.979675	45.3441	25315	25315	MS2	21/68	20130120_Brassica_A6.raw
	High	KKFETLSYLPDLTEVELGK	Unambiguous	2	1	Bra028181		HCD	1	0	1	1	219	3.35903	0	2	14.472	50	3	737.404	2210.2	0.340203	92.4312	51758	51758	MS2	23/72	20130120_Brassica_A6.raw
	High	LPLFGcTDSAQVLK	Unambiguous	5	2	Bra028181 ;Bra028406	C6(Carbamidomethyl)	HCD	1	0	1	1	405	3.35175	0	0	31.0543	50	2	774.908	1548.81	0.0880679	43.1047	24050	24050	MS2	16/26	20130120_Brassica_A6.raw
	High	EVQECKTEYPNAFIR	Unambiguous	4	3	Bra025431 ;Bra028181 ;Bra028406		HCD	1	0	1	1	370	3.34831	0	1	14.2779	17	3	609.635	1826.89	9.39316	30.8732	17104	17104	MS2	23/56	20130120_Brassica_A6.raw
	High	KFETLSYLPDLTEVELGK	Unambiguous	2	1	Bra028181		HCD	0.1463	0	1	1	302	3.34687	0	1	6.50805	50	3	694.704	2082.1	-0.929031	93.0921	52121	52121	MS2	20/68	20130120_Brassica_A6.raw
	High	QVQcISFIAYKPPSFTGA	Unambiguous	3	2	Bra028181 ;Bra028406	C4(Carbamidomethyl)	HCD	1	0	1	1	361	3.33751	0	0	0	50	2	1007.51	2014.02	5.55936	42.693	23820	23820	MS2	16/34	20130120_Brassica_A6.raw
	High	QVQcISFIAYKPPSFTGA	Unambiguous	3	2	Bra028181 ;Bra028406	C4(Carbamidomethyl)	HCD	1	0	1	1	323	3.33646	0	0	0	39	2	1007.51	2014.01	-0.622886	84.1557	47135	47135	MS2	14/34	20130120_Brassica_A6.raw
	High	QVQcISFIAYKPPSFTGA	Unambiguous	3	2	Bra028181 ;Bra028406	C4(Carbamidomethyl)	HCD	1	0	1	1	327	3.33608	0	0	17.9826	50	2	1007.51	2014.01	0.407494	44.5094	24887	24887	MS2	15/34	20130120_Brassica_A1.raw
	High	FETLSYLPDLTEVELGK	Unambiguous	2	1	Bra028181		HCD	0.2145	0	1	1	305	3.31297	0	0	0.538443	7	2	977.507	1954.01	0.266025	48.6719	27153	27153	MS2	16/32	20130120_Brassica_A2.raw
	High	WIPcVEFELEHGFVYR	Unambiguous	4	3	Bra025431 ;Bra028181 ;Bra028406	C4(Carbamidomethyl)	HCD	1	0	1	1	331	3.3054	0	0	5.18286	50	2	1041	2081	2.64804	47.2274	26346	26346	MS2	16/30	20130120_Brassica_A2.raw
	High	KKFETLSYLPDLTEVELGK	Unambiguous	2	1	Bra028181		HCD	0.203	0	1	1	224	3.30245	0	2	9.93599	7	3	737.402	2210.19	-2.31087	42.1985	23563	23563	MS2	23/72	20130120_Brassica_A5.raw
	High	LPLFGcTDSAQVLK	Unambiguous	5	2	Bra028181 ;Bra028406	C6(Carbamidomethyl)	HCD	1	0	1	1	395	3.30126	0	0	21.1069	50	2	774.91	1548.81	2.53134	91.3393	51101	51101	MS2	18/26	20130120_Brassica_A2.raw
	High	KKFETLSYLPDLTEVELGK	Unambiguous	2	1	Bra028181		HCD	0.1212	0	1	1	214	3.30057	0	2	9.44195	50	3	737.403	2210.2	-0.156872	92.1499	51601	51601	MS2	24/72	20130120_Brassica_A6.raw
	High	KKFETLSYLPDLTEVELGK	Unambiguous	2	1	Bra028181		HCD	0.1915	0	1	1	192	3.29332	0	2	14.3468	50	3	737.406	2210.2	3.15695	92.408	51744	51744	MS2	23/72	20130120_Brassica_A6.raw
	High	KKFETLSYLPDLTEVELGK	Unambiguous	2	1	Bra028181		HCD	1	0	1	1	198	3.28822	0	2	6.63872	17	4	553.305	2210.2	1.49396	42.5361	23714	23714	MS2	27/108	20130120_Brassica_A2.raw
	High	EHGSTPGYYDGR	Unambiguous	3	2	Bra025431 ;Bra028181		HCD	1	0	1	1	56	3.28072	0	0	2.11695	13	2	669.788	1338.57	-2.08317	22.2846	12216	12216	MS2	16/22	20130120_Brassica_A6.raw
	High	QVQcISFIAYKPPSFTGA	Unambiguous	3	2	Bra028181 ;Bra028406	C4(Carbamidomethyl)	HCD	1	0	1	1	366	3.28057	0	0	0	50	2	1007.51	2014.01	-0.380444	46.8914	26183	26183	MS2	13/34	20130120_Brassica_A6.raw
	High	WIPcVEFELEHGFVYR	Unambiguous	4	3	Bra025431 ;Bra028181 ;Bra028406	C4(Carbamidomethyl)	HCD	1	0	1	1	302	3.27898	0	0	25.2294	50	2	1041	2081	2.76536	46.9214	26243	26243	MS2	16/30	20130120_Brassica_A1.raw
	High	QVQcISFIAYKPPSFTGA	Unambiguous	3	2	Bra028181 ;Bra028406	C4(Carbamidomethyl)	HCD	1	0	1	1	381	3.25862	0	0	1.39119	0	3	672.008	2014.01	-1.17506	44.1097	24618	24618	MS2	16/68	20130120_Brassica_A6.raw
	High	LPLFGcTDSAQVLK	Unambiguous	5	2	Bra028181 ;Bra028406	C6(Carbamidomethyl)	HCD	1	0	1	1	378	3.25107	0	0	15.005	50	2	774.907	1548.81	-0.936536	44.9895	25116	25116	MS2	16/26	20130120_Brassica_A6.raw
	High	KKFETLSYLPDLTEVELGK	Selected	2	1	Bra028181		HCD	0	0	1	1	203	3.25091	0	2	9.38976	42	3	737.404	2210.2	0.754431	42.2369	23546	23546	MS2	21/72	20130120_Brassica_A2.raw
	High	LPLFGcTDSAQVLK	Unambiguous	5	2	Bra028181 ;Bra028406	C6(Carbamidomethyl)	HCD	1	0	1	1	368	3.24021	0	0	10.0526	50	2	774.908	1548.81	-0.621273	88.2911	49449	49449	MS2	19/26	20130120_Brassica_A6.raw
	High	FETLSYLPDLTEVELGK	Unambiguous	2	1	Bra028181		HCD	1	0	1	1	332	3.224	0	0	3.894	50	2	977.507	1954.01	0.640856	48.9431	27305	27305	MS2	15/32	20130120_Brassica_A2.raw
	High	KKFETLSYLPDLTEVELGK	Selected	2	1	Bra028181		HCD		0.033	3	3	224	3.22216	0	2	5.61983	26	3	737.402	2210.19	-2.47656	42.0645	23463	23463	MS2	22/72	20130120_Brassica_A6.raw
	High	FETLSYLPDLTEVELGK	Selected	2	1	Bra028181		HCD		0.0213	3	3	294	3.20898	0	0	10.3565	33	2	977.509	1954.01	2.63995	48.1808	26908	26908	MS2	17/32	20130120_Brassica_A6.raw
	High	QVQcISFIAYKPPSFTGA	Unambiguous	3	2	Bra028181 ;Bra028406	C4(Carbamidomethyl)	HCD	1	0	1	1	318	3.20057	0	0	0	9	2	1007.51	2014.01	-0.01678	43.2167	24113	24113	MS2	14/34	20130120_Brassica_A6.raw
	High	YWTmWKLPLFGcTDSAQVLK	Unambiguous	5	2	Bra028181 ;Bra028406	M4(Oxidation); C12(Carbamidomethyl)	HCD	1	0	1	1	385	3.19425	0	1	0	50	3	820.739	2460.2	-3.29948	48.404	27033	27033	MS2	25/76	20130120_Brassica_A6.raw
	High	EHGSTPGYYDGR	Unambiguous	3	2	Bra025431 ;Bra028181		HCD	1	0	1	1	60	3.18598	0	0	0	50	2	669.789	1338.57	-0.168082	22.1641	12149	12149	MS2	16/22	20130120_Brassica_A6.raw
	High	KKFETLSYLPDLTEVELGK	Selected	2	1	Bra028181		HCD		0.0886	3	3	197	3.18505	0	2	27.8497	50	4	553.305	2210.2	1.60442	42.5684	23575	23575	MS2	31/108	20130120_Brassica_A7.raw
	High	LPLFGcTDSAQVLK	Unambiguous	5	2	Bra028181 ;Bra028406	C6(Carbamidomethyl)	HCD	1	0	1	1	369	3.17452	0	0	23.916	9	2	774.909	1548.81	1.03385	40.2703	22436	22436	MS2	15/26	20130120_Brassica_A2.raw
	High	KKFETLSYLPDLTEVELGK	Unambiguous	2	1	Bra028181		HCD	0.164	0	1	1	215	3.17375	0	2	9.98765	12	3	737.403	2210.19	-0.571102	42.5032	23695	23695	MS2	22/72	20130120_Brassica_A2.raw
	High	EVQEcKTEYPNAFIR	Unambiguous	4	3	Bra025431 ;Bra028181 ;Bra028406	C5(Carbamidomethyl)	HCD	1	0	1	1	289	3.16612	0	1	0	50	2	942.446	1883.89	-5.64681	32.1936	17862	17862	MS2	13/28	20130120_Brassica_A6.raw
	High	FETLSYLPDLTEVELGK	Unambiguous	2	1	Bra028181		HCD	0.142	0	1	1	327	3.16523	0	0	11.2334	50	2	977.507	1954.01	0.703327	50.8283	28388	28388	MS2	15/32	20130120_Brassica_A6.raw
	High	QVQcISFIAYKPPSFTGA	Unambiguous	3	2	Bra028181 ;Bra028406	C4(Carbamidomethyl)	HCD	1	0	1	1	372	3.15526	0	0	0	50	2	1007.51	2014.01	-0.683497	47.5674	26564	26564	MS2	15/34	20130120_Brassica_A6.raw
	High	QVQcISFIAYKPPSFTGA	Unambiguous	3	2	Bra028181 ;Bra028406	C4(Carbamidomethyl)	HCD	1	0	1	1	379	3.14546	0	0	5.3334	50	3	672.008	2014.01	0.0977647	84.4595	47306	47306	MS2	17/68	20130120_Brassica_A6.raw
	High	QVQcISFIAYKPPSFTGA	Unambiguous	3	2	Bra028181 ;Bra028406	C4(Carbamidomethyl)	HCD	1	0	1	1	346	3.14001	0	0	3.45531	41	2	1007.51	2014.01	-2.3806	43.5777	24456	24456	MS2	14/34	20130120_Brassica_A3.raw
	High	QVQcISFIAYKPPSFTGA	Unambiguous	3	2	Bra028181 ;Bra028406	C4(Carbamidomethyl)	HCD	1	0	1	1	325	3.13547	0	0	0	50	2	1007.51	2014.01	-2.19877	46.3779	25895	25895	MS2	13/34	20130120_Brassica_A6.raw
	High	WIPcVEFELEHGFVYR	Unambiguous	4	3	Bra025431 ;Bra028181 ;Bra028406	C4(Carbamidomethyl)	HCD	1	0	1	1	372	3.13237	0	0	12.5256	13	3	694.338	2081	1.70303	47.4206	26482	26482	MS2	21/60	20130120_Brassica_A6.raw
	High	QVQcISFIAYKPPSFTGA	Unambiguous	3	2	Bra028181 ;Bra028406	C4(Carbamidomethyl)	HCD	1	0	1	1	358	3.12868	0	0	1.23014	14	2	1007.51	2014.01	-1.47144	49.7839	27803	27803	MS2	13/34	20130120_Brassica_A6.raw
	High	LPLFGcTDSAQVLK	Unambiguous	5	2	Bra028181 ;Bra028406	C6(Carbamidomethyl)	HCD	1	0	1	1	403	3.1266	0	0	48.9233	8	2	774.908	1548.81	-0.30601	39.6201	22109	22109	MS2	16/26	20130120_Brassica_A5.raw
	High	LPLFGcTDSAQVLK	Unambiguous	5	2	Bra028181 ;Bra028406	C6(Carbamidomethyl)	HCD	1	0	1	1	383	3.11733	0	0	21.8811	50	2	774.909	1548.81	1.66438	42.8333	23898	23898	MS2	16/26	20130120_Brassica_A6.raw
	High	KFETLSYLPDLTEVELGK	Unambiguous	2	1	Bra028181		HCD	1	0	1	1	178	3.11275	0	1	3.44672	50	2	1041.56	2082.11	3.88494	91.7738	51392	51392	MS2	14/34	20130120_Brassica_A6.raw
	High	QVQcISFIAYKPPSFTGA	Unambiguous	3	2	Bra028181 ;Bra028406	C4(Carbamidomethyl)	HCD	1	0	1	1	343	3.11183	0	0	0	50	2	1007.51	2014.02	4.34716	91.3345	51107	51107	MS2	14/34	20130120_Brassica_A4.raw
	High	LPLFGcTDSAQVLK	Unambiguous	5	2	Bra028181 ;Bra028406	C6(Carbamidomethyl)	HCD	1	0	1	1	379	3.10519	0	0	0	50	2	774.909	1548.81	1.50675	40.8237	22597	22597	MS2	16/26	20130120_Brassica_A7.raw
	High	LPLFGcTDSAQVLK	Unambiguous	5	2	Bra028181 ;Bra028406	C6(Carbamidomethyl)	HCD	1	0	1	1	355	3.08985	0	0	16.1813	50	2	774.909	1548.81	1.19148	91.2394	51055	51055	MS2	16/26	20130120_Brassica_A4.raw
	High	LPLFGcTDSAQVLK	Unambiguous	5	2	Bra028181 ;Bra028406	C6(Carbamidomethyl)	HCD	1	0	1	1	375	3.06456	0	0	8.09125	50	2	774.909	1548.81	1.58556	44.4731	24824	24824	MS2	14/26	20130120_Brassica_A6.raw
	High	FETLSYLPDLTEVELGK	Unambiguous	2	1	Bra028181		HCD	1	0	1	1	298	3.04951	0	0	0	50	2	977.507	1954.01	0.640856	49.219	27489	27489	MS2	14/32	20130120_Brassica_A6.raw
	High	QVQcISFIAYKPPSFTGA	Unambiguous	3	2	Bra028181 ;Bra028406	C4(Carbamidomethyl)	HCD	1	0	1	1	385	3.04197	0	0	0.956976	44	3	672.008	2014.01	-0.629562	87.2991	48891	48891	MS2	15/68	20130120_Brassica_A6.raw
	High	LPLFGcTDSAQVLK	Unambiguous	5	2	Bra028181 ;Bra028406	C6(Carbamidomethyl)	HCD	1	0	1	1	373	3.03719	0	0	4.42646	50	2	774.909	1548.81	1.50675	91.379	50953	50953	MS2	15/26	20130120_Brassica_A7.raw
	High	FETLSYLPDLTEVELGK	Unambiguous	2	1	Bra028181		HCD	1	0	1	1	352	3.03078	0	0	27.6134	50	3	652.006	1954	-0.677934	48.7993	27224	27224	MS2	17/64	20130120_Brassica_A2.raw
	High	FETLSYLPDLTEVELGK	Unambiguous	2	1	Bra028181		HCD	0.1419	0	1	1	309	3.02998	0	0	0	50	2	977.509	1954.01	2.45253	92.0987	51572	51572	MS2	17/32	20130120_Brassica_A6.raw
	High	EVQEcKTEYPNAFIR	Unambiguous	4	3	Bra025431 ;Bra028181 ;Bra028406	C5(Carbamidomethyl)	HCD	1	0	1	1	367	3.02154	0	1	10.8695	0	3	628.637	1883.9	-0.34058	31.5502	17489	17489	MS2	18/56	20130120_Brassica_A6.raw
	High	NKWIPcVEFELEHGFVYR	Unambiguous	4	3	Bra025431 ;Bra028181 ;Bra028406	C6(Carbamidomethyl)	HCD	1	0	1	1	426	3.02114	0	1	10.7996	50	4	581.538	2323.13	-0.512552	45.3455	25316	25316	MS2	21/102	20130120_Brassica_A6.raw
	High	FETLSYLPDLTEVELGK	Unambiguous	2	1	Bra028181		HCD	1	0	1	1	349	3.01709	0	0	19.735	46	3	652.005	1954	-2.17726	48.6097	27148	27148	MS2	20/64	20130120_Brassica_A6.raw
	High	QVQcISFIAYKPPSFTGA	Unambiguous	3	2	Bra028181 ;Bra028406	C4(Carbamidomethyl)	HCD	1	0	1	1	322	3.0154	0	0	0	50	2	1007.51	2014.01	1.0136	44.3125	24757	24757	MS2	11/34	20130120_Brassica_A5.raw
	High	QVQcISFIAYKPPSFTGA	Unambiguous	3	2	Bra028181 ;Bra028406	C4(Carbamidomethyl)	HCD	0.1325	0	1	1	363	3.01527	0	0	0	50	2	1007.5	2014	-5.22932	43.9963	24599	24599	MS2	14/34	20130120_Brassica_A1.raw
	High	FETLSYLPDLTEVELGK	Unambiguous	2	1	Bra028181		HCD	1	0	1	1	301	3.00784	0	0	5.16501	49	2	977.507	1954.01	0.45344	50.5595	28238	28238	MS2	14/32	20130120_Brassica_A6.raw
	High	EVQEcKTEYPNAFIR	Unambiguous	4	3	Bra025431 ;Bra028181 ;Bra028406	C5(Carbamidomethyl)	HCD	1	0	1	1	265	3.00416	0	1	0	50	2	942.451	1883.89	-0.463036	32.1566	17739	17739	MS2	13/28	20130120_Brassica_A7.raw
	High	QVQcISFIAYKPPSFTGA	Unambiguous	3	2	Bra028181 ;Bra028406	C4(Carbamidomethyl)	HCD	1	0	1	1	380	2.98838	0	0	7.35794	50	3	672.009	2014.01	1.09784	43.5825	24320	24320	MS2	15/68	20130120_Brassica_A6.raw
	High	QVQcISFIAYKPPSFTGA	Unambiguous	3	2	Bra028181 ;Bra028406	C4(Carbamidomethyl)	HCD	1	0	1	1	323	2.96938	0	0	0	50	2	1007.51	2014.01	-0.622886	86.7823	48602	48602	MS2	13/34	20130120_Brassica_A6.raw
	High	KKFETLSYLPDLTEVELGK	Unambiguous	2	1	Bra028181		HCD	1	0	1	1	169	2.96382	0	2	60.739	50	3	737.408	2210.21	5.6423	91.71	51315	51315	MS2	24/72	20130120_Brassica_A4.raw
	High	KKFETLSYLPDLTEVELGK	Selected	2	1	Bra028181		HCD		0.0575	3	3	172	2.95491	0	2	24.4546	50	3	737.407	2210.21	4.97954	41.3732	23207	23207	MS2	21/72	20130120_Brassica_A3.raw
	High	WIPcVEFELEHGFVYR	Unambiguous	4	3	Bra025431 ;Bra028181 ;Bra028406	C4(Carbamidomethyl)	HCD	1	0	1	1	376	2.95369	0	0	10.2018	50	3	694.335	2080.99	-2.1685	87.0774	48767	48767	MS2	17/60	20130120_Brassica_A6.raw
	High	WIPcVEFELEHGFVYR	Unambiguous	4	3	Bra025431 ;Bra028181 ;Bra028406	C4(Carbamidomethyl)	HCD	1	0	1	1	383	2.95043	0	0	4.44348	50	3	694.335	2080.99	-2.78443	84.4369	47295	47295	MS2	17/60	20130120_Brassica_A6.raw
	High	LPLFGcTDSAQVLK	Unambiguous	5	2	Bra028181 ;Bra028406	C6(Carbamidomethyl)	HCD	1	0	1	1	368	2.95018	0	0	17.6016	29	2	774.908	1548.81	-0.700089	40.4404	22549	22549	MS2	16/26	20130120_Brassica_A6.raw
	High	LPLFGcTDSAQVLK	Unambiguous	5	2	Bra028181 ;Bra028406	C6(Carbamidomethyl)	HCD	1	0	1	1	364	2.94824	0	0	0	50	2	774.906	1548.8	-2.82812	41.1722	22794	22794	MS2	14/26	20130120_Brassica_A7.raw
	High	WIPcVEFELEHGFVYR	Unambiguous	4	3	Bra025431 ;Bra028181 ;Bra028406	C4(Carbamidomethyl)	HCD	1	0	1	1	388	2.94507	0	0	7.75444	50	3	694.335	2080.99	-1.64056	84.0961	47102	47102	MS2	18/60	20130120_Brassica_A6.raw
	High	QVQcISFIAYKPPSFTGA	Unambiguous	3	2	Bra028181 ;Bra028406	C4(Carbamidomethyl)	HCD	1	0	1	1	363	2.93429	0	0		50	2	1007.51	2014.01	-1.34085	82.4518	46172	46172	MS2	13/34	20130120_Brassica_A6.raw
	High	KKFETLSYLPDLTEVELGK	Unambiguous	2	1	Bra028181		HCD	1	0	1	1	224	2.93004	0	2	26.0567	8	3	737.402	2210.19	-2.14518	42.4654	23707	23707	MS2	22/72	20130120_Brassica_A4.raw
	High	QVQcISFIAYKPPSFTGA	Unambiguous	3	2	Bra028181 ;Bra028406	C4(Carbamidomethyl)	HCD	1	0	1	1	296	2.92767	0	0	10.6955	36	2	1007.52	2014.02	6.52912	46.1212	25752	25752	MS2	13/34	20130120_Brassica_A6.raw
	High	WIPcVEFELEHGFVYR	Unambiguous	4	3	Bra025431 ;Bra028181 ;Bra028406	C4(Carbamidomethyl)	HCD	1	0	1	1	307	2.92668	0	0	25.8499	50	2	1041	2080.99	-0.988845	47.4986	26525	26525	MS2	13/30	20130120_Brassica_A6.raw
	High	EHGSTPGYYDGR	Unambiguous	3	2	Bra025431 ;Bra028181		HCD	1	0	1	1	58	2.91887	0	0	1.03229	45	2	669.789	1338.57	-0.71525	22.5385	12359	12359	MS2	16/22	20130120_Brassica_A6.raw
	High	LPLFGcTDSAQVLK	Unambiguous	5	2	Bra028181 ;Bra028406	C6(Carbamidomethyl)	HCD	1	0	1	1	384	2.91522	0	0	21.5038	50	2	774.909	1548.81	1.50675	39.7686	22006	22006	MS2	13/26	20130120_Brassica_A7.raw
	High	KFETLSYLPDLTEVELGK	Selected	2	1	Bra028181		HCD	0.0378	0	1	1	313	2.91177	0	1	14.7964	50	3	694.705	2082.1	-0.57726	45.197	25242	25242	MS2	21/68	20130120_Brassica_A4.raw
	High	KFETLSYLPDLTEVELGK	Unambiguous	2	1	Bra028181		HCD	1	0	1	1	310	2.88582	0	1	1.45313	5	3	694.705	2082.1	-0.665203	46.0314	25703	25703	MS2	17/68	20130120_Brassica_A6.raw
	High	QVQcISFIAYKPPSFTGA	Unambiguous	3	2	Bra028181 ;Bra028406	C4(Carbamidomethyl)	HCD	1	0	1	1	355	2.86622	0	0	2.23502	50	2	1007.51	2014	-3.22915	43.9437	24541	24541	MS2	13/34	20130120_Brassica_A4.raw
	High	FETLSYLPDLTEVELGK	Unambiguous	2	1	Bra028181		HCD	1	0	1	1	353	2.86573	0	0	1.01168	6	3	652.006	1954	-1.61501	48.5454	27112	27112	MS2	17/64	20130120_Brassica_A6.raw
	High	KKFETLSYLPDLTEVELGK	Unambiguous	2	1	Bra028181		HCD	1	0	1	1	219	2.83168	0	2	16.0303	50	3	737.404	2210.2	0.174511	41.9039	23506	23506	MS2	22/72	20130120_Brassica_A3.raw
	High	KKFETLSYLPDLTEVELGK	Selected	2	1	Bra028181		HCD		0.0471	3	3	178	2.82867	0	2	32.8555	4	2	1105.6	2210.19	-0.426941	42.2179	23549	23549	MS2	15/36	20130120_Brassica_A6.raw
	High	QVQcISFIAYKPPSFTGA	Unambiguous	3	2	Bra028181 ;Bra028406	C4(Carbamidomethyl)	HCD	1	0	1	1	275	2.82861	0	0	0	50	2	1007.51	2014.01	-0.441054	92.0006	51518	51518	MS2	13/34	20130120_Brassica_A6.raw
	High	LPLFGcTDSAQVLK	Unambiguous	5	2	Bra028181 ;Bra028406	C6(Carbamidomethyl)	HCD	1	0	1	1	321	2.82323	0	0	54.7549	50	2	774.907	1548.81	-0.936536	88.6685	49662	49662	MS2	18/26	20130120_Brassica_A6.raw
	High	KKFETLSYLPDLTEVELGK	Unambiguous	2	1	Bra028181		HCD	1	0	1	1	220	2.80794	0	2	6.13651	50	3	737.404	2210.2	0.340203	40.9979	22863	22863	MS2	24/72	20130120_Brassica_A6.raw
	High	QVQcISFIAYKPPSFTGA	Unambiguous	3	2	Bra028181 ;Bra028406	C4(Carbamidomethyl)	HCD	1	0	1	1	355	2.80679	0	0	0	50	2	1007.51	2014.01	-1.41083	83.1077	46541	46541	MS2	14/34	20130120_Brassica_A6.raw
	High	LPLFGcTDSAQVLK	Unambiguous	5	2	Bra028181 ;Bra028406	C6(Carbamidomethyl)	HCD	1	0	1	1	394	2.80141	0	0	0	50	2	774.908	1548.81	-0.542457	82.5226	46213	46213	MS2	16/26	20130120_Brassica_A6.raw
	High	EHGSTPGYYDGR	Unambiguous	3	2	Bra025431 ;Bra028181		HCD	1	0	1	1	65	2.79806	0	0	3.12001	13	3	446.861	1338.57	-1.13567	22.3874	12275	12275	MS2	22/44	20130120_Brassica_A6.raw
	High	EHGSTPGYYDGR	Unambiguous	3	2	Bra025431 ;Bra028181		HCD	1	0	1	1	65	2.78854	0	0	2.25298	50	2	669.789	1338.57	0.196696	22.1093	12133	12133	MS2	17/22	20130120_Brassica_A5.raw
	High	LPLFGcTDSAQVLK	Unambiguous	5	2	Bra028181 ;Bra028406	C6(Carbamidomethyl)	HCD	1	0	1	1	383	2.78381	0	0	23.4631	50	2	774.91	1548.81	1.97964	91.3359	51155	51155	MS2	15/26	20130120_Brassica_A1.raw
	High	KKFETLSYLPDLTEVELGK	Unambiguous	2	1	Bra028181		HCD	1	0	1	1	204	2.7828	0	2	11.0507	50	3	737.405	2210.2	1.74858	92.756	51937	51937	MS2	21/72	20130120_Brassica_A6.raw
	High	LPLFGCTDSAQVLK	Unambiguous	5	2	Bra028181 ;Bra028406		HCD	1	0	1	1	380	2.78263	0	0	11.2197	12	2	746.396	1491.78	-1.80428	45.7213	25528	25528	MS2	16/26	20130120_Brassica_A6.raw
	High	KFETLSYLPDLTEVELGK	Unambiguous	2	1	Bra028181		HCD	1	0	1	1	302	2.75883	0	1	55.5598	50	3	694.706	2082.1	1.35748	48.1836	26910	26910	MS2	18/68	20130120_Brassica_A6.raw
	High	EHGSTPGYYDGR	Unambiguous	3	2	Bra025431 ;Bra028181		HCD	1	0	1	1	65	2.73888	0	0	7.32304	4	3	446.861	1338.57	-1.40926	22.4286	12297	12297	MS2	19/44	20130120_Brassica_A6.raw
	High	KFETLSYLPDLTEVELGK	Selected	2	1	Bra028181		HCD		0.0552	3	3	304	2.73563	0	1	7.61097	50	3	694.706	2082.1	1.09365	43.846	24469	24469	MS2	22/68	20130120_Brassica_A6.raw
	High	KFETLSYLPDLTEVELGK	Unambiguous	2	1	Bra028181		HCD	1	0	1	1	294	2.73505	0	1	0	50	3	694.704	2082.1	-0.929031	93.358	52269	52269	MS2	20/68	20130120_Brassica_A6.raw
	High	EVQEcKTEYPNAFIR	Unambiguous	4	3	Bra025431 ;Bra028181 ;Bra028406	C5(Carbamidomethyl)	HCD	1	0	1	1	356	2.73086	0	1	38.6963	30	3	628.636	1883.89	-1.11814	31.7472	17607	17607	MS2	18/56	20130120_Brassica_A2.raw
	High	QVQcISFIAYKPPSFTGA	Unambiguous	3	2	Bra028181 ;Bra028406	C4(Carbamidomethyl)	HCD	1	0	1	1	391	2.72809	0	0	21.5176	50	3	672.009	2014.01	0.552344	86.7525	48586	48586	MS2	16/68	20130120_Brassica_A6.raw
	High	LPLFGCTDSAQVLK	Unambiguous	5	2	Bra028181 ;Bra028406		HCD	1	0	1	1	374	2.71893	0	0	39.4576	19	2	746.405	1491.8	9.48793	39.1955	21836	21836	MS2	15/26	20130120_Brassica_A6.raw
	High	FETLSYLPDLTEVELGK	Unambiguous	2	1	Bra028181		HCD	1	0	1	1	299	2.71856	0	0	0	50	2	977.511	1954.01	4.76397	91.8398	51428	51428	MS2	13/32	20130120_Brassica_A6.raw
	High	LPLFGcTDSAQVLK	Unambiguous	5	2	Bra028181 ;Bra028406	C6(Carbamidomethyl)	HCD	1	0	1	1	286	2.71275	0	0	0	50	1	1548.81	1548.81	0.530235	40.2625	22448	22448	MS2	11/26	20130120_Brassica_A6.raw
	High	EHGSTPGYYDGR	Unambiguous	3	2	Bra025431 ;Bra028181		HCD	1	0	1	1	71	2.70417	0	0	10.5953	50	2	669.79	1338.57	1.19983	22.0983	12116	12116	MS2	15/22	20130120_Brassica_A3.raw
	High	LPLFGcTDSAQVLK	Unambiguous	5	2	Bra028181 ;Bra028406	C6(Carbamidomethyl)	HCD	1	0	1	1	378	2.69817	0	0	16.1196	50	2	774.91	1548.81	2.13727	91.2946	51125	51125	MS2	15/26	20130120_Brassica_A5.raw
	High	FETLSYLPDLTEVELGKEVDYLLR	Unambiguous	2	1	Bra028181		HCD	1	0	1	1	176	2.69189	0	1	2.45107	17	2	1421.75	2842.48	2.46988	55.706	31127	31127	MS2	14/46	20130120_Brassica_A6.raw
	High	KKFETLSYLPDLTEVELGK	Unambiguous	2	1	Bra028181		HCD	1	0	1	1	200	2.67883	0	2	10.3496	50	3	737.404	2210.2	0.920123	92.6719	51890	51890	MS2	22/72	20130120_Brassica_A6.raw
	High	KFETLSYLPDLTEVELGK	Unambiguous	2	1	Bra028181		HCD	1	0	1	1	292	2.65916	0	1	2.01244	17	3	694.706	2082.1	0.741879	45.2261	25248	25248	MS2	17/68	20130120_Brassica_A6.raw
	High	QVQcISFIAYKPPSFTGA	Unambiguous	3	2	Bra028181 ;Bra028406	C4(Carbamidomethyl)	HCD	1	0	1	1	386	2.63677	0	0	2.68488	7	3	672.008	2014.01	-0.811394	44.2609	24717	24717	MS2	16/68	20130120_Brassica_A4.raw
	High	WIPcVEFELEHGFVYR	Unambiguous	4	3	Bra025431 ;Bra028181 ;Bra028406	C4(Carbamidomethyl)	HCD	1	0	1	1	377	2.63481	0	0	79.852	50	3	694.337	2081	0.119227	47.0919	26113	26113	MS2	17/60	20130120_Brassica_A7.raw
	High	KFETLSYLPDLTEVELGK	Unambiguous	2	1	Bra028181		HCD	1	0	1	1	277	2.62982	0	1	31.0738	50	3	694.706	2082.1	0.829822	45.8091	25585	25585	MS2	16/68	20130120_Brassica_A4.raw
	High	EVDYLLR	Unambiguous	6	3	Bra025431 ;Bra028181 ;Bra028406		HCD	1	0	1	2	298	2.62467	0	0	0	50	1	907.487	907.487	-1.93721	31.6675	17557	17557	MS2	12/12	20130120_Brassica_A6.raw
	High	KFETLSYLPDLTEVELGK	Unambiguous	2	1	Bra028181		HCD	1	0	1	1	310	2.62009	0	1	0	24	3	694.703	2082.09	-3.03966	46.9394	26210	26210	MS2	19/68	20130120_Brassica_A6.raw
	High	EHGSTPGYYDGR	Unambiguous	3	2	Bra025431 ;Bra028181		HCD	1	0	1	1	65	2.61794	0	0	10.171	33	3	446.861	1338.57	-0.862087	22.3746	12261	12261	MS2	20/44	20130120_Brassica_A2.raw
	High	KKFETLSYLPDLTEVELGK	Unambiguous	2	1	Bra028181		HCD	1	0	1	1	203	2.61469	0	2	0.882636	2	3	737.404	2210.2	1.00297	42.6889	23817	23817	MS2	21/72	20130120_Brassica_A6.raw
	High	FETLSYLPDLTEVELGKEVDYLLR	Unambiguous	2	1	Bra028181		HCD	1	0	1	1	288	2.61283	0	1	0	50	3	948.164	2842.48	0.962079	55.6991	31127	31127	MS2	15/92	20130120_Brassica_A5.raw
	High	TEYPNAFIR	Unambiguous	4	3	Bra025431 ;Bra028181 ;Bra028406		HCD	1	0	1	1	232	2.59219	0	0	0.448445	1	2	555.784	1110.56	2.0124	32.8063	18213	18213	MS2	12/16	20130120_Brassica_A6.raw
	High	FETLSYLPDLTEVELGK	Unambiguous	2	1	Bra028181		HCD	1	0	1	1	225	2.5889	0	0	0	50	2	977.507	1954.01	1.01569	87.4589	48980	48980	MS2	10/32	20130120_Brassica_A6.raw
	High	QVQcISFIAYKPPSFTGA	Unambiguous	3	2	Bra028181 ;Bra028406	C4(Carbamidomethyl)	HCD	1	0	1	1	293	2.57943	0	0	0	50	2	1007.51	2014.01	-1.95632	84.6691	47423	47423	MS2	11/34	20130120_Brassica_A6.raw
	High	FETLSYLPDLTEVELGK	Unambiguous	2	1	Bra028181		HCD	1	0	1	1	283	2.57519	0	0	3.30204	50	2	977.509	1954.01	2.70242	50.2679	28074	28074	MS2	13/32	20130120_Brassica_A6.raw
	High	FETLSYLPDLTEVELGK	Unambiguous	2	1	Bra028181		HCD	1	0	1	1	291	2.57048	0	0	11.2558	50	2	977.513	1954.02	6.32575	91.5806	51284	51284	MS2	12/32	20130120_Brassica_A6.raw
	High	EVDYLLR	Unambiguous	6	3	Bra025431 ;Bra028181 ;Bra028406		HCD	1	0	1	2	238	2.56522	0	0	6.99466	31	1	907.49	907.49	1.29114	32.0998	17827	17827	MS2	11/12	20130120_Brassica_A4.raw
	High	FETLSYLPDLTEVELGK	Unambiguous	2	1	Bra028181		HCD	1	0	1	1	263	2.5446	0	0	3.61126	50	2	977.508	1954.01	1.6404	92.361	51719	51719	MS2	10/32	20130120_Brassica_A6.raw
	High	LPLFGcTDSAQVLK	Unambiguous	5	2	Bra028181 ;Bra028406	C6(Carbamidomethyl)	HCD	1	0	1	1	400	2.5298	0	0	30.6781	35	2	774.91	1548.81	2.68898	39.1936	21964	21964	MS2	14/26	20130120_Brassica_A3.raw
	High	LPLFGcTDSAQVLK	Unambiguous	5	2	Bra028181 ;Bra028406	C6(Carbamidomethyl)	HCD	1	0	1	1	376	2.52882	0	0	20.9221	50	2	774.908	1548.81	-0.30601	88.0076	49290	49290	MS2	18/26	20130120_Brassica_A6.raw
Bra000144	rubisco activase	1192.16	56.21	1	4	21	279	475	51.8869	5.96045
	Confidence Level	Sequence	PSM Ambiguity	# Proteins	# Protein Groups	Protein Group Accessions	Modifications	Activation Type	ΔScore	ΔCn	Rank	Search Engine Rank	Peptides Matched	XCorr	Probability	# Missed Cleavages	Isolation Interference [%]	Ion Inject Time [ms]	Charge	m/z [Da]	MH+ [Da]	ΔM [ppm]	RT [min]	First Scan	Last Scan	MS Order	Ions Matched	Spectrum File
	High	TDNVKDEDIVTLVDQFPGQSIDFFGALR	Unambiguous	1	1	Bra000144		HCD	1	0	1	1	437	8.00306	0	1	0.239381	24	3	1047.19	3139.56	-0.993877	54.0786	30328	30328	MS2	43/108	20130120_Brassica_A3.raw
	High	VQLADQYLNEAALGDANADAIGR	Unambiguous	2	2	Bra000144 ;Bra017055		HCD	1	0	1	1	330	7.19438	0	0	6.94901	50	2	1194.6	2388.19	2.81691	41.8271	23378	23378	MS2	32/44	20130120_Brassica_A1.raw
	High	VQLADQYLNEAALGDANADAIGR	Unambiguous	2	2	Bra000144 ;Bra017055		HCD	1	0	1	1	313	7.06812	0	0	0	50	2	1194.59	2388.18	1.18126	41.461	23149	23149	MS2	31/44	20130120_Brassica_A5.raw
	High	RVQLADQYLNEAALGDANADAIGR	Unambiguous	2	2	Bra000144 ;Bra017055		HCD	1	0	1	1	374	7.03052	0	1	11.208	50	3	848.765	2544.28	-0.185918	39.0758	21821	21821	MS2	35/92	20130120_Brassica_A1.raw
	High	VQLADQYLNEAALGDANADAIGR	Unambiguous	2	2	Bra000144 ;Bra017055		HCD	1	0	1	1	301	6.98468	0	0	0.996529	22	2	1194.59	2388.18	1.28349	41.7078	23248	23248	MS2	31/44	20130120_Brassica_A2.raw
	High	RVQLADQYLNEAALGDANADAIGR	Unambiguous	2	2	Bra000144 ;Bra017055		HCD	1	0	1	1	380	6.98462	0	1	0	50	3	848.764	2544.28	-1.26543	39.121	21827	21827	MS2	35/92	20130120_Brassica_A5.raw
	High	VQLADQYLNEAALGDANADAIGR	Unambiguous	2	2	Bra000144 ;Bra017055		HCD	1	0	1	1	307	6.95573	0	0	0	26	2	1194.6	2388.18	1.99909	41.5567	23226	23226	MS2	32/44	20130120_Brassica_A1.raw
	High	RVQLADQYLNEAALGDANADAIGR	Unambiguous	2	2	Bra000144 ;Bra017055		HCD	1	0	1	1	374	6.95099	0	1	1.59794	6	3	848.765	2544.28	-0.185918	38.7996	21740	21740	MS2	34/92	20130120_Brassica_A3.raw
	High	VQLADQYLNEAALGDANADAIGR	Unambiguous	2	2	Bra000144 ;Bra017055		HCD	1	0	1	1	331	6.89621	0	0	0	50	2	1194.59	2388.18	0.874575	42.0513	23476	23476	MS2	30/44	20130120_Brassica_A4.raw
	High	RVQLADQYLNEAALGDANADAIGR	Unambiguous	2	2	Bra000144 ;Bra017055		HCD	1	0	1	1	377	6.83305	0	1	2.57659	47	3	848.764	2544.28	-0.833626	39.5415	22055	22055	MS2	34/92	20130120_Brassica_A4.raw
	High	VQLADQYLNEAALGDANADAIGR	Unambiguous	2	2	Bra000144 ;Bra017055		HCD	1	0	1	1	319	6.68188	0	0	0	3	2	1194.59	2388.18	-0.658857	41.5058	23281	23281	MS2	30/44	20130120_Brassica_A3.raw
	High	VQLADQYLNEAALGDANADAIGR	Unambiguous	2	2	Bra000144 ;Bra017055		HCD	1	0	1	1	328	6.6372	0	0	0	6	2	1194.59	2388.18	-0.147712	41.2432	23131	23131	MS2	30/44	20130120_Brassica_A3.raw
	High	TDNVKDEDIVTLVDQFPGQSIDFFGALR	Unambiguous	1	1	Bra000144		HCD	1	0	1	1	440	6.63392	0	1	0	50	3	1047.19	3139.55	-1.34381	54.3371	30472	30472	MS2	40/108	20130120_Brassica_A3.raw
	High	GmVDSVFQAPmGTGTHNAVLSSYEYISQGLK	Unambiguous	3	3	Bra000144 ;Bra005019 ;Bra017055	M2(Oxidation); M11(Oxidation)	HCD	1	0	1	1	403	6.52793	0	0	0	43	3	1107.19	3319.56	0.342719	45.6205	25603	25603	MS2	34/120	20130120_Brassica_A3.raw
	High	VQLADQYLNEAALGDANADAIGR	Unambiguous	2	2	Bra000144 ;Bra017055		HCD	1	0	1	1	323	6.51394	0	0	0	50	2	1194.59	2388.18	1.07903	91.5006	51356	51356	MS2	30/44	20130120_Brassica_A3.raw
	High	GmVDSVFQAPmGTGTHNAVLSSYEYISQGLK	Unambiguous	3	3	Bra000144 ;Bra005019 ;Bra017055	M2(Oxidation); M11(Oxidation)	HCD	1	0	1	1	408	6.39358	0	0	2.32085	40	3	1107.19	3319.56	-1.09143	91.5336	51375	51375	MS2	35/120	20130120_Brassica_A3.raw
	High	VQLADQYLNEAALGDANADAIGR	Unambiguous	2	2	Bra000144 ;Bra017055		HCD	1	0	1	1	331	6.31631	0	0	0	50	2	1194.6	2388.18	1.59017	42.0107	23419	23419	MS2	28/44	20130120_Brassica_A2.raw
	High	VQLADQYLNEAALGDANADAIGR	Unambiguous	2	2	Bra000144 ;Bra017055		HCD	1	0	1	1	398	6.23773	0	0	1.11173	36	3	796.731	2388.18	-0.0255569	41.5673	23231	23231	MS2	34/88	20130120_Brassica_A1.raw
	High	VQLADQYLNEAALGDANADAIGR	Unambiguous	2	2	Bra000144 ;Bra017055		HCD	1	0	1	1	377	6.13844	0	0	2.55443	27	3	796.73	2388.18	-1.09896	41.2406	23129	23129	MS2	33/88	20130120_Brassica_A3.raw
	High	TDNVKDEDIVTLVDQFPGQSIDFFGALR	Unambiguous	1	1	Bra000144		HCD	1	0	1	1	440	6.09972	0	1	3.41731	50	3	1047.19	3139.56	-0.877233	54.3024	30331	30331	MS2	38/108	20130120_Brassica_A4.raw
	High	VQLADQYLNEAALGDANADAIGR	Unambiguous	2	2	Bra000144 ;Bra017055		HCD	1	0	1	1	395	5.9188	0	0	5.63412	50	3	796.732	2388.18	0.434472	41.6975	23243	23243	MS2	32/88	20130120_Brassica_A2.raw
	High	VQLADQYLNEAALGDANADAIGR	Unambiguous	2	2	Bra000144 ;Bra017055		HCD	1	0	1	1	319	5.86302	0	0	0	50	2	1194.59	2388.18	-0.965544	41.7829	23324	23324	MS2	29/44	20130120_Brassica_A4.raw
	High	mGINPImmSAGELESGNAGEPAK	Unambiguous	3	3	Bra000144 ;Bra005019 ;Bra017055	M1(Oxidation); M7(Oxidation); M8(Oxidation)	HCD	1	0	1	1	181	5.84896	0	0	0	32	2	1176.53	2352.05	0.431824	34.7768	19388	19388	MS2	24/44	20130120_Brassica_A1.raw
	High	mGINPImmSAGELESGNAGEPAK	Unambiguous	3	3	Bra000144 ;Bra005019 ;Bra017055	M1(Oxidation); M7(Oxidation); M8(Oxidation)	HCD	1	0	1	1	183	5.84045	0	0	0.91798	4	2	1176.53	2352.05	-0.294769	34.3363	19204	19204	MS2	24/44	20130120_Brassica_A3.raw
	High	VQLADQYLNEAALGDANADAIGR	Unambiguous	2	2	Bra000144 ;Bra017055		HCD	1	0	1	1	337	5.82291	0	0	32.564	50	2	1194.6	2388.18	2.10132	41.7294	23299	23299	MS2	28/44	20130120_Brassica_A5.raw
	High	mGINPImmSAGELESGNAGEPAK	Unambiguous	3	3	Bra000144 ;Bra005019 ;Bra017055	M1(Oxidation); M7(Oxidation); M8(Oxidation)	HCD	1	0	1	1	182	5.79084	0	0	0	21	2	1176.53	2352.05	0.224227	34.5847	19250	19250	MS2	26/44	20130120_Brassica_A5.raw
	High	VPIIVTGNDFSTLYAPLIR	Unambiguous	3	3	Bra000144 ;Bra005019 ;Bra017055		HCD	1	0	1	1	94	5.75755	0	0	2.28233	22	2	1045.09	2089.17	-0.493407	49.2477	27631	27631	MS2	21/36	20130120_Brassica_A3.raw
	High	mGINPImmSAGELESGNAGEPAK	Unambiguous	3	3	Bra000144 ;Bra005019 ;Bra017055	M1(Oxidation); M7(Oxidation); M8(Oxidation)	HCD	1	0	1	1	182	5.75728	0	0	0	50	2	1176.53	2352.05	-0.0871704	34.8722	19414	19414	MS2	27/44	20130120_Brassica_A5.raw
	High	mGINPImmSAGELESGNAGEPAK	Unambiguous	3	3	Bra000144 ;Bra005019 ;Bra017055	M1(Oxidation); M7(Oxidation); M8(Oxidation)	HCD	1	0	1	1	191	5.75344	0	0	0	14	2	1176.53	2352.05	1.36601	34.6043	19357	19357	MS2	23/44	20130120_Brassica_A3.raw
	High	mGINPImmSAGELESGNAGEPAK	Unambiguous	3	3	Bra000144 ;Bra005019 ;Bra017055	M1(Oxidation); M7(Oxidation); M8(Oxidation)	HCD	1	0	1	1	159	5.74057	0	0	0	43	2	1176.53	2352.05	-1.43656	34.0512	18947	18947	MS2	23/44	20130120_Brassica_A5.raw
	High	mGINPImmSAGELESGNAGEPAK	Unambiguous	3	3	Bra000144 ;Bra005019 ;Bra017055	M1(Oxidation); M7(Oxidation); M8(Oxidation)	HCD	1	0	1	1	174	5.71007	0	0	0	50	2	1176.53	2352.05	-0.398568	33.8077	18903	18903	MS2	22/44	20130120_Brassica_A3.raw
	High	TDNVKDEDIVTLVDQFPGQSIDFFGALR	Unambiguous	1	1	Bra000144		HCD	1	0	1	1	420	5.7058	0	1	0	50	3	1047.19	3139.55	-2.27697	54.5976	30616	30616	MS2	39/108	20130120_Brassica_A3.raw
	High	VQLADQYLNEAALGDANADAIGR	Unambiguous	2	2	Bra000144 ;Bra017055		HCD	1	0	1	1	312	5.68456	0	0	0	18	2	1194.6	2388.19	5.47484	41.8086	23319	23319	MS2	29/44	20130120_Brassica_A6.raw
	High	TDNVKDEDIVTLVDQFPGQSIDFFGALR	Unambiguous	1	1	Bra000144		HCD	1	0	1	1	310	5.65912	0	1	0	50	2	1570.29	3139.58	6.1451	53.8745	30215	30215	MS2	31/54	20130120_Brassica_A3.raw
	High	mGINPImmSAGELESGNAGEPAK	Unambiguous	3	3	Bra000144 ;Bra005019 ;Bra017055	M1(Oxidation); M7(Oxidation); M8(Oxidation)	HCD	1	0	1	1	189	5.64755	0	0	0	3	2	1176.53	2352.05	0.431824	34.0691	19051	19051	MS2	24/44	20130120_Brassica_A3.raw
	High	mGINPImmSAGELESGNAGEPAK	Unambiguous	3	3	Bra000144 ;Bra005019 ;Bra017055	M1(Oxidation); M7(Oxidation); M8(Oxidation)	HCD	1	0	1	1	192	5.63886	0	0	0	47	2	1176.53	2352.05	1.26221	34.359	19120	19120	MS2	26/44	20130120_Brassica_A4.raw
	High	mGINPImmSAGELESGNAGEPAK	Unambiguous	3	3	Bra000144 ;Bra005019 ;Bra017055	M1(Oxidation); M7(Oxidation); M8(Oxidation)	HCD	1	0	1	1	198	5.58158	0	0	0	17	2	1176.53	2352.06	1.67741	34.7929	19340	19340	MS2	23/44	20130120_Brassica_A2.raw
	High	mGINPImmSAGELESGNAGEPAK	Unambiguous	3	3	Bra000144 ;Bra005019 ;Bra017055	M1(Oxidation); M7(Oxidation); M8(Oxidation)	HCD	1	0	1	1	203	5.57143	0	0	4.05666	22	3	784.688	2352.05	-0.611883	34.72	19324	19324	MS2	33/88	20130120_Brassica_A4.raw
	High	mGINPImmSAGELESGNAGEPAK	Unambiguous	3	3	Bra000144 ;Bra005019 ;Bra017055	M1(Oxidation); M7(Oxidation); M8(Oxidation)	HCD	1	0	1	1	202	5.542	0	0	6.87408	50	2	1176.53	2352.06	2.0926	91.5632	51391	51391	MS2	24/44	20130120_Brassica_A3.raw
	High	VQLADQYLNEAALGDANADAIGR	Unambiguous	2	2	Bra000144 ;Bra017055		HCD	1	0	1	1	398	5.53069	0	0	8.82075	50	3	796.733	2388.19	2.73461	41.977	23400	23400	MS2	33/88	20130120_Brassica_A2.raw
	High	LmEYGNmLVmEQENVKR	Unambiguous	3	3	Bra000144 ;Bra005019 ;Bra017055	M2(Oxidation); M7(Oxidation); M10(Oxidation)	HCD	1	0	1	1	292	5.49936	0	1	2.07275	5	3	711.333	2131.98	0.641825	30.311	16808	16808	MS2	28/64	20130120_Brassica_A5.raw
	High	mGINPImmSAGELESGNAGEPAK	Unambiguous	3	3	Bra000144 ;Bra005019 ;Bra017055	M1(Oxidation); M7(Oxidation); M8(Oxidation)	HCD	1	0	1	1	212	5.49838	0	0	11.399	25	3	784.689	2352.05	0.555856	34.4574	19176	19176	MS2	34/88	20130120_Brassica_A4.raw
	High	mGINPImmSAGELESGNAGEPAK	Unambiguous	3	3	Bra000144 ;Bra005019 ;Bra017055	M1(Oxidation); M7(Oxidation); M8(Oxidation)	HCD	1	0	1	1	188	5.4974	0	0	0	10	2	1176.53	2352.05	1.15842	34.6251	19270	19270	MS2	23/44	20130120_Brassica_A4.raw
	High	mGINPImmSAGELESGNAGEPAK	Unambiguous	3	3	Bra000144 ;Bra005019 ;Bra017055	M1(Oxidation); M7(Oxidation); M8(Oxidation)	HCD	1	0	1	1	201	5.45803	0	0	0	19	2	1176.53	2352.06	1.78121	34.2557	19091	19091	MS2	23/44	20130120_Brassica_A1.raw
	High	mGINPImmSAGELESGNAGEPAK	Unambiguous	3	3	Bra000144 ;Bra005019 ;Bra017055	M1(Oxidation); M7(Oxidation); M8(Oxidation)	HCD	1	0	1	1	209	5.45448	0	0	0	26	2	1176.53	2352.06	2.3002	35.1627	19577	19577	MS2	24/44	20130120_Brassica_A4.raw
	High	VQLADQYLNEAALGDANADAIGR	Unambiguous	2	2	Bra000144 ;Bra017055		HCD	1	0	1	1	328	5.4117	0	0	0	50	2	1194.59	2388.18	1.48795	40.6088	22771	22771	MS2	28/44	20130120_Brassica_A3.raw
	High	LmEYGNmLVmEQENVKR	Unambiguous	3	3	Bra000144 ;Bra005019 ;Bra017055	M2(Oxidation); M7(Oxidation); M10(Oxidation)	HCD	1	0	1	1	295	5.40869	0	1	13.496	12	3	711.332	2131.98	-0.646451	29.9997	16622	16622	MS2	27/64	20130120_Brassica_A4.raw
	High	mGINPImmSAGELESGNAGEPAK	Unambiguous	3	3	Bra000144 ;Bra005019 ;Bra017055	M1(Oxidation); M7(Oxidation); M8(Oxidation)	HCD	1	0	1	1	170	5.40698	0	0	0	50	2	1176.53	2352.05	-0.606166	33.9879	18941	18941	MS2	27/44	20130120_Brassica_A1.raw
	High	mGINPImmSAGELESGNAGEPAK	Unambiguous	3	3	Bra000144 ;Bra005019 ;Bra017055	M1(Oxidation); M7(Oxidation); M8(Oxidation)	HCD	1	0	1	1	182	5.35548	0	0	1.55414	11	2	1176.53	2352.05	0.431824	34.8942	19424	19424	MS2	23/44	20130120_Brassica_A4.raw
	High	VQLADQYLNEAALGDANADAIGR	Unambiguous	2	2	Bra000144 ;Bra017055		HCD	1	0	1	1	379	5.3291	0	0	0	50	3	796.73	2388.17	-2.09569	41.7991	23333	23333	MS2	30/88	20130120_Brassica_A4.raw
	High	VPIIVTGNDFSTLYAPLIR	Unambiguous	3	3	Bra000144 ;Bra005019 ;Bra017055		HCD	1	0	1	1	84	5.3266	0	0	0	18	2	1045.09	2089.17	0.207754	49.6195	27749	27749	MS2	23/36	20130120_Brassica_A1.raw
	High	VPIIVTGNDFSTLYAPLIR	Unambiguous	3	3	Bra000144 ;Bra005019 ;Bra017055		HCD	1	0	1	1	97	5.30116	0	0	0	50	2	1045.09	2089.17	-1.07771	49.5973	27701	27701	MS2	21/36	20130120_Brassica_A4.raw
	High	VQLADQYLNEAALGDANADAIGR	Unambiguous	2	2	Bra000144 ;Bra017055		HCD	1	0	1	1	393	5.29903	0	0	24.1312	11	3	796.732	2388.18	1.35453	41.5112	23178	23178	MS2	33/88	20130120_Brassica_A5.raw
	High	RVQLADQYLNEAALGDANADAIGR	Unambiguous	2	2	Bra000144 ;Bra017055		HCD	1	0	1	1	372	5.27886	0	1	17.1332	50	3	848.767	2544.29	2.40491	39.0653	21891	21891	MS2	32/92	20130120_Brassica_A3.raw
	High	mGINPImmSAGELESGNAGEPAK	Unambiguous	3	3	Bra000144 ;Bra005019 ;Bra017055	M1(Oxidation); M7(Oxidation); M8(Oxidation)	HCD	1	0	1	1	190	5.27663	0	0	18.9273	41	3	784.687	2352.05	-2.86952	35.1975	19571	19571	MS2	29/88	20130120_Brassica_A2.raw
	High	mGINPImmSAGELESGNAGEPAK	Unambiguous	3	3	Bra000144 ;Bra005019 ;Bra017055	M1(Oxidation); M7(Oxidation); M8(Oxidation)	HCD	1	0	1	1	209	5.27591	0	0	3.79747	37	3	784.689	2352.05	0.0887609	34.5559	19262	19262	MS2	30/88	20130120_Brassica_A1.raw
	High	mGINPImmSAGELESGNAGEPAK	Unambiguous	3	3	Bra000144 ;Bra005019 ;Bra017055	M1(Oxidation); M7(Oxidation); M8(Oxidation)	HCD	1	0	1	1	216	5.25822	0	0	8.39722	31	3	784.689	2352.05	0.400158	33.8551	18930	18930	MS2	29/88	20130120_Brassica_A3.raw
	High	mGINPImmSAGELESGNAGEPAK	Unambiguous	3	3	Bra000144 ;Bra005019 ;Bra017055	M1(Oxidation); M7(Oxidation); M8(Oxidation)	HCD	1	0	1	1	189	5.24591	0	0	0	16	2	1176.53	2352.05	0.328025	34.5088	19235	19235	MS2	23/44	20130120_Brassica_A1.raw
	High	GKGmVDSVFQAPmGTGTHNAVLSSYEYISQGLK	Unambiguous	3	3	Bra000144 ;Bra005019 ;Bra017055	M4(Oxidation); M13(Oxidation)	HCD	1	0	1	1	382	5.23133	0	1	0	50	3	1168.9	3504.69	2.80189	91.6271	51427	51427	MS2	38/128	20130120_Brassica_A3.raw
	High	TDNVKDEDIVTLVDQFPGQSIDFFGALR	Unambiguous	1	1	Bra000144		HCD	1	0	1	1	410	5.22318	0	1	3.91315	36	3	1047.19	3139.56	1.339	53.9388	30141	30141	MS2	33/108	20130120_Brassica_A5.raw
	High	VPIIVTGNDFSTLYAPLIR	Unambiguous	3	3	Bra000144 ;Bra005019 ;Bra017055		HCD	1	0	1	1	108	5.21927	0	0	10.854	50	2	1045.08	2089.16	-3.29806	49.4405	27631	27631	MS2	23/36	20130120_Brassica_A5.raw
	High	GKGmVDSVFQAPmGTGTHNAVLSSYEYISQGLK	Unambiguous	3	3	Bra000144 ;Bra005019 ;Bra017055	M4(Oxidation); M13(Oxidation)	HCD	1	0	1	1	378	5.20778	0	1	0	47	3	1168.9	3504.67	-0.750833	43.585	24348	24348	MS2	36/128	20130120_Brassica_A5.raw
	High	VQLADQYLNEAALGDANADAIGR	Unambiguous	2	2	Bra000144 ;Bra017055		HCD	1	0	1	1	395	5.20465	0	0	26.6167	50	3	796.731	2388.18	0.281129	41.835	23333	23333	MS2	34/88	20130120_Brassica_A6.raw
	High	LmEYGNmLVmEQENVKR	Unambiguous	3	3	Bra000144 ;Bra005019 ;Bra017055	M2(Oxidation); M7(Oxidation); M10(Oxidation)	HCD	1	0	1	1	294	5.20393	0	1	5.80187	10	3	711.332	2131.98	-0.217026	30.3289	16797	16797	MS2	28/64	20130120_Brassica_A2.raw
	High	LmEYGNmLVmEQENVKR	Unambiguous	3	3	Bra000144 ;Bra005019 ;Bra017055	M2(Oxidation); M7(Oxidation); M10(Oxidation)	HCD	1	0	1	1	289	5.19573	0	1	11.5128	13	3	711.331	2131.98	-1.67707	29.4889	16401	16401	MS2	28/64	20130120_Brassica_A3.raw
	High	mGINPImmSAGELESGNAGEPAK	Unambiguous	3	3	Bra000144 ;Bra005019 ;Bra017055	M1(Oxidation); M7(Oxidation); M8(Oxidation)	HCD	1	0	1	1	177	5.19057	0	0	0	50	2	1176.53	2352.05	-0.294769	34.8786	19513	19513	MS2	24/44	20130120_Brassica_A3.raw
	High	mGINPImmSAGELESGNAGEPAK	Unambiguous	3	3	Bra000144 ;Bra005019 ;Bra017055	M1(Oxidation); M7(Oxidation); M8(Oxidation)	HCD	1	0	1	1	183	5.16187	0	0	0	15	2	1176.53	2352.05	0.535623	35.0673	19497	19497	MS2	26/44	20130120_Brassica_A2.raw
	High	mGINPImmSAGELESGNAGEPAK	Unambiguous	3	3	Bra000144 ;Bra005019 ;Bra017055	M1(Oxidation); M7(Oxidation); M8(Oxidation)	HCD	1	0	1	1	166	5.16077	0	0	0	13	2	1176.53	2352.05	-1.12516	34.316	19096	19096	MS2	23/44	20130120_Brassica_A5.raw
	High	VPIIVTGNDFSTLYAPLIR	Unambiguous	3	3	Bra000144 ;Bra005019 ;Bra017055		HCD	1	0	1	1	85	5.14785	0	0	0	50	2	1045.09	2089.17	-0.142827	83.2224	46708	46708	MS2	21/36	20130120_Brassica_A3.raw
	High	VQLADQYLNEAALGDANADAIGR	Unambiguous	2	2	Bra000144 ;Bra017055		HCD	1	0	1	1	377	5.14351	0	0	33.5204	50	3	796.73	2388.18	-1.09896	91.5034	51358	51358	MS2	32/88	20130120_Brassica_A3.raw
	High	VPIIVTGNDFSTLYAPLIR	Unambiguous	3	3	Bra000144 ;Bra005019 ;Bra017055		HCD	1	0	1	1	91	5.12571	0	0	0	50	2	1045.09	2089.17	-0.259687	82.9657	46564	46564	MS2	21/36	20130120_Brassica_A3.raw
	High	VPIIVTGNDFSTLYAPLIR	Unambiguous	3	3	Bra000144 ;Bra005019 ;Bra017055		HCD	1	0	1	1	83	5.09116	0	0	0.577892	9	2	1045.09	2089.17	0.558334	49.8429	27808	27808	MS2	21/36	20130120_Brassica_A2.raw
	High	LmEYGNmLVmEQENVKR	Unambiguous	3	3	Bra000144 ;Bra005019 ;Bra017055	M2(Oxidation); M7(Oxidation); M10(Oxidation)	HCD	1	0	1	1	271	5.05863	0	1	0	50	2	1066.49	2131.98	-0.210719	30.0412	16645	16645	MS2	22/32	20130120_Brassica_A4.raw
	High	mGINPImmSAGELESGNAGEPAK	Unambiguous	3	3	Bra000144 ;Bra005019 ;Bra017055	M1(Oxidation); M7(Oxidation); M8(Oxidation)	HCD	1	0	1	1	195	5.02866	0	0	1.30378	27	3	784.688	2352.05	-1.15683	34.3794	19132	19132	MS2	30/88	20130120_Brassica_A5.raw
	High	VPIIVTGNDFSTLYAPLIR	Unambiguous	3	3	Bra000144 ;Bra005019 ;Bra017055		HCD	1	0	1	1	95	5.02672	0	0	0	50	2	1045.09	2089.17	-1.66201	83.4894	46861	46861	MS2	20/36	20130120_Brassica_A3.raw
	High	mGINPImmSAGELESGNAGEPAK	Unambiguous	3	3	Bra000144 ;Bra005019 ;Bra017055	M1(Oxidation); M7(Oxidation); M8(Oxidation)	HCD	1	0	1	1	210	5.00741	0	0	2.39521	5	3	784.689	2352.05	-0.222636	34.1243	19084	19084	MS2	33/88	20130120_Brassica_A3.raw
	High	GKGmVDSVFQAPmGTGTHNAVLSSYEYISQGLK	Unambiguous	3	3	Bra000144 ;Bra005019 ;Bra017055	M4(Oxidation); M13(Oxidation)	HCD	1	0	1	1	388	4.99968	0	1	10.908	33	4	876.928	3504.69	3.37276	91.6442	51437	51437	MS2	43/192	20130120_Brassica_A3.raw
	High	mGINPImmSAGELESGNAGEPAK	Unambiguous	3	3	Bra000144 ;Bra005019 ;Bra017055	M1(Oxidation); M7(Oxidation); M8(Oxidation)	HCD	1	0	1	1	220	4.99966	0	0	1.21942	39	3	784.689	2352.05	0.867253	34.6241	19246	19246	MS2	31/88	20130120_Brassica_A2.raw
	High	mGINPImmSAGELESGNAGEPAK	Unambiguous	3	3	Bra000144 ;Bra005019 ;Bra017055	M1(Oxidation); M7(Oxidation); M8(Oxidation)	HCD	1	0	1	1	194	4.99868	0	0	21.1873	50	3	784.688	2352.05	-1.00113	34.0224	18961	18961	MS2	31/88	20130120_Brassica_A1.raw
	High	GmVDSVFQAPmGTGTHNAVLSSYEYISQGLK	Unambiguous	3	3	Bra000144 ;Bra005019 ;Bra017055	M2(Oxidation); M11(Oxidation)	HCD	1	0	1	1	394	4.99571	0	0	1.84698	50	3	1107.19	3319.55	-2.74622	45.966	25672	25672	MS2	32/120	20130120_Brassica_A4.raw
	High	VPIIVTGNDFSTLYAPLIR	Unambiguous	3	3	Bra000144 ;Bra005019 ;Bra017055		HCD	1	0	1	1	81	4.99487	0	0	0	50	2	1045.09	2089.17	0.792054	83.7428	47005	47005	MS2	20/36	20130120_Brassica_A3.raw
	High	mGINPImmSAGELESGNAGEPAK	Unambiguous	3	3	Bra000144 ;Bra005019 ;Bra017055	M1(Oxidation); M7(Oxidation); M8(Oxidation)	HCD	1	0	1	1	215	4.99142	0	0	0	29	3	784.689	2352.05	0.322309	34.2875	19109	19109	MS2	32/88	20130120_Brassica_A1.raw
	High	mGINPImmSAGELESGNAGEPAK	Unambiguous	3	3	Bra000144 ;Bra005019 ;Bra017055	M1(Oxidation); M7(Oxidation); M8(Oxidation)	HCD	1	0	1	1	211	4.97919	0	0	6.1087	12	3	784.689	2352.05	-0.144787	34.3847	19232	19232	MS2	27/88	20130120_Brassica_A3.raw
	High	LmEYGNmLVmEQENVKR	Unambiguous	3	3	Bra000144 ;Bra005019 ;Bra017055	M2(Oxidation); M7(Oxidation); M10(Oxidation)	HCD	1	0	1	1	249	4.95476	0	1	0	34	2	1066.49	2131.98	-1.12683	29.5017	16408	16408	MS2	21/32	20130120_Brassica_A3.raw
	High	LmEYGNmLVmEQENVKR	Unambiguous	3	3	Bra000144 ;Bra005019 ;Bra017055	M2(Oxidation); M7(Oxidation); M10(Oxidation)	HCD	1	0	1	1	287	4.95098	0	1	11.8776	50	3	711.334	2131.99	1.84421	30.2519	16751	16751	MS2	29/64	20130120_Brassica_A6.raw
	High	VPIIVTGNDFSTLYAPLIR	Unambiguous	3	3	Bra000144 ;Bra005019 ;Bra017055		HCD	1	0	1	1	102	4.94846	0	0	0	50	2	1045.09	2089.17	-0.843988	49.5751	27659	27659	MS2	22/36	20130120_Brassica_A2.raw
	High	VPIIVTGNDFSTLYAPLIR	Unambiguous	3	3	Bra000144 ;Bra005019 ;Bra017055		HCD	1	0	1	1	74	4.8952	0	0	2.93828	50	2	1045.09	2089.17	1.25949	49.348	27598	27598	MS2	21/36	20130120_Brassica_A1.raw
	High	RVQLADQYLNEAALGDANADAIGR	Unambiguous	2	2	Bra000144 ;Bra017055		HCD	1	0	1	1	389	4.88598	0	1	13.7978	50	3	848.762	2544.27	-4.00021	39.5619	22047	22047	MS2	29/92	20130120_Brassica_A6.raw
	High	VPIIVTGNDFSTLYAPLIR	Unambiguous	3	3	Bra000144 ;Bra005019 ;Bra017055		HCD	1	0	1	1	80	4.87487	0	0	22.0445	50	2	1045.09	2089.17	-0.0259664	49.5621	27681	27681	MS2	21/36	20130120_Brassica_A6.raw
	High	AAQQVNLPVPEGcTDPQADNFDPTAR	Unambiguous	1	1	Bra000144	C13(Carbamidomethyl)	HCD	1	0	1	1	333	4.85277	0	0	33.4574	50	3	937.77	2811.3	-1.34505	37.7356	21035	21035	MS2	30/100	20130120_Brassica_A5.raw
	High	VPIIVTGNDFSTLYAPLIR	Unambiguous	3	3	Bra000144 ;Bra005019 ;Bra017055		HCD	1	0	1	1	101	4.844	0	0	0	50	2	1045.09	2089.16	-2.24631	51.1485	28693	28693	MS2	19/36	20130120_Brassica_A3.raw
	High	VPIIVTGNDFSTLYAPLIR	Unambiguous	3	3	Bra000144 ;Bra005019 ;Bra017055		HCD	1	0	1	1	75	4.83781	0	0	0.675388	6	2	1045.09	2089.17	0.792054	49.8631	27847	27847	MS2	20/36	20130120_Brassica_A4.raw
	High	AAQQVNLPVPEGcTDPQADNFDPTAR	Unambiguous	1	1	Bra000144	C13(Carbamidomethyl)	HCD	1	0	1	1	353	4.81536	0	0	1.88903	22	3	937.772	2811.3	-0.107537	37.3688	20926	20926	MS2	31/100	20130120_Brassica_A3.raw
	High	LmEYGNmLVmEQENVKR	Unambiguous	3	3	Bra000144 ;Bra005019 ;Bra017055	M2(Oxidation); M7(Oxidation); M10(Oxidation)	HCD	1	0	1	1	294	4.81489	0	1	0.736484	2	3	711.332	2131.98	-0.302911	30.0968	16704	16704	MS2	27/64	20130120_Brassica_A1.raw
	High	GmVDSVFQAPmGTGTHNAVLSSYEYISQGLK	Unambiguous	3	3	Bra000144 ;Bra005019 ;Bra017055	M2(Oxidation); M11(Oxidation)	HCD	1	0	1	1	404	4.8135	0	0	10.657	22	3	1107.19	3319.56	0.453038	45.9171	25657	25657	MS2	30/120	20130120_Brassica_A5.raw
	High	LmEYGNmLVmEQENVK	Unambiguous	3	3	Bra000144 ;Bra005019 ;Bra017055	M2(Oxidation); M7(Oxidation); M10(Oxidation)	HCD	1	0	1	1	210	4.78926	0	0	0	50	2	988.444	1975.88	0.166485	31.458	17542	17542	MS2	22/30	20130120_Brassica_A3.raw
	High	mGINPImmSAGELESGNAGEPAK	Unambiguous	3	3	Bra000144 ;Bra005019 ;Bra017055	M1(Oxidation); M7(Oxidation); M8(Oxidation)	HCD	1	0	1	1	195	4.77713	0	0	3.542	35	3	784.687	2352.05	-1.85747	34.1013	18976	18976	MS2	31/88	20130120_Brassica_A5.raw
	High	VPIIVTGNDFSTLYAPLIR	Unambiguous	3	3	Bra000144 ;Bra005019 ;Bra017055		HCD	1	0	1	1	86	4.75163	0	0	0	1	2	1045.09	2089.17	-0.610267	49.5177	27782	27782	MS2	19/36	20130120_Brassica_A3.raw
	High	mGINPImmSAGELESGNAGEPAK	Unambiguous	3	3	Bra000144 ;Bra005019 ;Bra017055	M1(Oxidation); M7(Oxidation); M8(Oxidation)	HCD	1	0	1	1	198	4.65269	0	0	0	50	2	1176.53	2352.05	0.950819	35.1499	19666	19666	MS2	23/44	20130120_Brassica_A3.raw
	High	mGINPImmSAGELESGNAGEPAK	Unambiguous	3	3	Bra000144 ;Bra005019 ;Bra017055	M1(Oxidation); M7(Oxidation); M8(Oxidation)	HCD	1	0	1	1	209	4.63235	0	0	31.8384	34	3	784.689	2352.05	0.0109117	34.8963	19400	19400	MS2	32/88	20130120_Brassica_A2.raw
	High	LmEYGNmLVmEQENVK	Unambiguous	3	3	Bra000144 ;Bra005019 ;Bra017055	M2(Oxidation); M7(Oxidation); M10(Oxidation)	HCD	1	0	1	1	210	4.60066	0	0	0	48	2	988.442	1975.88	-2.42829	31.939	17741	17741	MS2	21/30	20130120_Brassica_A5.raw
	High	LmEYGNmLVmEQENVK	Unambiguous	3	3	Bra000144 ;Bra005019 ;Bra017055	M2(Oxidation); M7(Oxidation); M10(Oxidation)	HCD	1	0	1	1	213	4.5953	0	0	0	25	2	988.444	1975.88	-0.636658	31.7206	17692	17692	MS2	21/30	20130120_Brassica_A3.raw
	High	VPIIVTGNDFSTLYAPLIR	Unambiguous	3	3	Bra000144 ;Bra005019 ;Bra017055		HCD	0.4292	0	1	1	126	4.58553	0	0	5.08782	23	3	697.061	2089.17	-0.704349	49.2516	27634	27634	MS2	30/72	20130120_Brassica_A3.raw
	High	AAQQVNLPVPEGcTDPQADNFDPTAR	Unambiguous	1	1	Bra000144	C13(Carbamidomethyl)	HCD	1	0	1	1	425	4.57571	0	0	33.0038	50	3	937.776	2811.31	4.19115	37.9744	21139	21139	MS2	29/100	20130120_Brassica_A2.raw
	High	mGINPImmSAGELESGNAGEPAK	Unambiguous	3	3	Bra000144 ;Bra005019 ;Bra017055	M1(Oxidation); M7(Oxidation); M8(Oxidation)	HCD	1	0	1	1	162	4.55593	0	0		50	2	1176.53	2352.04	-2.99869	35.3326	19645	19645	MS2	23/44	20130120_Brassica_A2.raw
	High	mGINPImmSAGELESGNAGEPAK	Unambiguous	3	3	Bra000144 ;Bra005019 ;Bra017055	M1(Oxidation); M7(Oxidation); M8(Oxidation)	HCD	1	0	1	1	186	4.55486	0	0	12.5308	38	3	784.687	2352.05	-2.40242	34.8082	19377	19377	MS2	29/88	20130120_Brassica_A5.raw
	High	LmEYGNmLVmEQENVKR	Unambiguous	3	3	Bra000144 ;Bra005019 ;Bra017055	M2(Oxidation); M7(Oxidation); M10(Oxidation)	HCD	1	0	1	1	294	4.55351	0	1	0.948267	1	3	711.332	2131.98	-0.217026	29.7461	16549	16549	MS2	27/64	20130120_Brassica_A3.raw
	High	AAQQVNLPVPEGcTDPQADNFDPTAR	Unambiguous	1	1	Bra000144	C13(Carbamidomethyl)	HCD	1	0	1	1	279	4.53663	0	0	0	50	2	1406.16	2811.3	1.19988	37.3064	20890	20890	MS2	22/50	20130120_Brassica_A3.raw
	High	VPIIVTGNDFSTLYAPLIR	Unambiguous	3	3	Bra000144 ;Bra005019 ;Bra017055		HCD	1	0	1	1	81	4.51503	0	0	0	50	2	1045.09	2089.17	1.02577	83.9995	47149	47149	MS2	19/36	20130120_Brassica_A3.raw
	High	TDNVKDEDIVTLVDQFPGQSIDFFGALR	Unambiguous	1	1	Bra000144		HCD	1	0	1	1	440	4.51035	0	1	0	50	4	785.644	3139.56	-0.74543	53.9216	30241	30241	MS2	43/162	20130120_Brassica_A3.raw
	High	VPIIVTGNDFSTLYAPLIR	Unambiguous	3	3	Bra000144 ;Bra005019 ;Bra017055		HCD	1	0	1	1	80	4.50294	0	0	0	8	2	1045.09	2089.17	-0.259687	49.7903	27935	27935	MS2	20/36	20130120_Brassica_A3.raw
	High	LmEYGNmLVmEQENVKR	Unambiguous	3	3	Bra000144 ;Bra005019 ;Bra017055	M2(Oxidation); M7(Oxidation); M10(Oxidation)	HCD	1	0	1	1	262	4.48598	0	1	0	7	2	1066.5	2131.98	0.476362	29.7613	16558	16558	MS2	20/32	20130120_Brassica_A3.raw
	High	RVQLADQYLNEAALGDANADAIGR	Unambiguous	2	2	Bra000144 ;Bra017055		HCD	1	0	1	1	255	4.46784	0	1	0	26	2	1272.64	2544.28	0.227183	38.8098	21745	21745	MS2	37/46	20130120_Brassica_A3.raw
	High	GmVDSVFQAPmGTGTHNAVLSSYEYISQGLK	Unambiguous	3	3	Bra000144 ;Bra005019 ;Bra017055	M2(Oxidation); M11(Oxidation)	HCD	1	0	1	1	403	4.44204	0	0	12.8389	50	3	1107.19	3319.56	-0.760472	45.3538	25454	25454	MS2	30/120	20130120_Brassica_A3.raw
	High	VPIIVTGNDFSTLYAPLIR	Unambiguous	3	3	Bra000144 ;Bra005019 ;Bra017055		HCD	1	0	1	1	71	4.43639	0	0	0	50	2	1045.09	2089.17	0.675194	84.2554	47293	47293	MS2	19/36	20130120_Brassica_A3.raw
	High	VPIIVTGNDFSTLYAPLIR	Unambiguous	3	3	Bra000144 ;Bra005019 ;Bra017055		HCD	1	0	1	1	127	4.42165	0	0	0	50	3	697.061	2089.17	-0.879639	49.4552	27639	27639	MS2	31/72	20130120_Brassica_A5.raw
	High	LmEYGNmLVmEQENVK	Unambiguous	3	3	Bra000144 ;Bra005019 ;Bra017055	M2(Oxidation); M7(Oxidation); M10(Oxidation)	HCD	1	0	1	1	227	4.41876	0	0	7.14033	47	2	988.444	1975.88	0.228265	32.2806	17930	17930	MS2	22/30	20130120_Brassica_A4.raw
	High	VPIIVTGNDFSTLYAPLIR	Unambiguous	3	3	Bra000144 ;Bra005019 ;Bra017055		HCD	1	0	1	1	103	4.37874	0	0	7.76635	29	2	1045.09	2089.17	-0.493407	49.7029	27759	27759	MS2	19/36	20130120_Brassica_A4.raw
	High	LmEYGNmLVMEQENVKR	Unambiguous	3	3	Bra000144 ;Bra005019 ;Bra017055	M2(Oxidation); M7(Oxidation)	HCD	0.3547	0	1	1	291	4.37321	0	1	2.39903	29	3	706.002	2115.99	1.30109	31.2719	17436	17436	MS2	24/64	20130120_Brassica_A3.raw
	High	VPIIVTGNDFSTLYAPLIR	Unambiguous	3	3	Bra000144 ;Bra005019 ;Bra017055		HCD	1	0	1	1	99	4.34608	0	0	33.0343	50	3	697.062	2089.17	1.57442	49.3507	27600	27600	MS2	27/72	20130120_Brassica_A1.raw
	High	GKGmVDSVFQAPmGTGTHNAVLSSYEYISQGLK	Unambiguous	3	3	Bra000144 ;Bra005019 ;Bra017055	M4(Oxidation); M13(Oxidation)	HCD	1	0	1	1	381	4.29157	0	1	5.89757	50	4	876.926	3504.68	1.77055	43.7418	24457	24457	MS2	40/192	20130120_Brassica_A1.raw
	High	mccLFINDLDAGAGR	Unambiguous	2	2	Bra000144 ;Bra017055	M1(Oxidation); C2(Carbamidomethyl); C3(Carbamidomethyl)	HCD	1	0	1	1	104	4.28816	0	0	11.2574	50	2	864.879	1728.75	0.0517771	39.3779	21994	21994	MS2	17/28	20130120_Brassica_A1.raw
	High	GLAYDTSDDQQDITR	Unambiguous	1	1	Bra000144		HCD	1	0	1	1	200	4.26788	0	0	0	21	2	849.384	1697.76	0.0228759	28.3959	15761	15761	MS2	17/28	20130120_Brassica_A3.raw
	High	LmEYGNmLVmEQENVK	Unambiguous	3	3	Bra000144 ;Bra005019 ;Bra017055	M2(Oxidation); M7(Oxidation); M10(Oxidation)	HCD	1	0	1	1	246	4.26422	0	0	3.90509	49	2	988.448	1975.89	4.24396	32.342	17944	17944	MS2	21/30	20130120_Brassica_A2.raw
	High	VPIIVTGNDFSTLYAPLIR	Unambiguous	3	3	Bra000144 ;Bra005019 ;Bra017055		HCD	1	0	1	1	97	4.26422	0	0	0	50	2	1045.09	2089.17	-0.843988	84.5111	47437	47437	MS2	19/36	20130120_Brassica_A3.raw
	High	LmEYGNmLVmEQENVK	Unambiguous	3	3	Bra000144 ;Bra005019 ;Bra017055	M2(Oxidation); M7(Oxidation); M10(Oxidation)	HCD	1	0	1	1	215	4.25751	0	0	0	50	2	988.445	1975.88	0.784287	32.0184	17780	17780	MS2	21/30	20130120_Brassica_A4.raw
	High	GLAYDTSDDQQDITR	Unambiguous	1	1	Bra000144		HCD	1	0	1	1	196	4.25291	0	0	0.357543	0	2	849.385	1697.76	0.526181	28.6535	15910	15910	MS2	18/28	20130120_Brassica_A3.raw
	High	GLAYDTSDDQQDITR	Unambiguous	1	1	Bra000144		HCD	1	0	1	1	202	4.24721	0	0	0	50	2	849.385	1697.76	0.741883	29.0742	16079	16079	MS2	17/28	20130120_Brassica_A6.raw
	High	GLAYDTSDDQQDITR	Unambiguous	1	1	Bra000144		HCD	1	0	1	1	203	4.24319	0	0	0.422579	2	2	849.384	1697.76	-0.624231	29.0486	16075	16075	MS2	18/28	20130120_Brassica_A4.raw
	High	GmVDSVFQAPmGTGTHNAVLSSYEYISQGLK	Unambiguous	3	3	Bra000144 ;Bra005019 ;Bra017055	M2(Oxidation); M11(Oxidation)	HCD	1	0	1	1	408	4.23342	0	0	0	50	3	1107.19	3319.57	1.77686	46.1157	25723	25723	MS2	27/120	20130120_Brassica_A2.raw
	High	VPIIVTGNDFSTLYAPLIR	Unambiguous	3	3	Bra000144 ;Bra005019 ;Bra017055		HCD	1	0	1	1	127	4.23342	0	0	0	50	3	697.061	2089.17	-0.967285	83.4271	46825	46825	MS2	30/72	20130120_Brassica_A3.raw
	High	GKGmVDSVFQAPmGTGTHNAVLSSYEYISQGLK	Unambiguous	3	3	Bra000144 ;Bra005019 ;Bra017055	M4(Oxidation); M13(Oxidation)	HCD	1	0	1	1	380	4.22302	0	1	2.34531	19	3	1168.9	3504.68	0.607564	43.0858	24179	24179	MS2	34/128	20130120_Brassica_A3.raw
	High	VPIIVTGNDFSTLYAPLIR	Unambiguous	3	3	Bra000144 ;Bra005019 ;Bra017055		HCD	1	0	1	1	125	4.21601	0	0	0	9	3	697.06	2089.17	-1.31787	49.5218	27785	27785	MS2	30/72	20130120_Brassica_A3.raw
	High	VPIIVTGNDFSTLYAPLIR	Unambiguous	3	3	Bra000144 ;Bra005019 ;Bra017055		HCD	1	0	1	1	71	4.21179	0	0	0	50	2	1045.09	2089.17	-0.142827	82.4377	46267	46267	MS2	18/36	20130120_Brassica_A3.raw
	High	mccLFINDLDAGAGR	Unambiguous	2	2	Bra000144 ;Bra017055	M1(Oxidation); C2(Carbamidomethyl); C3(Carbamidomethyl)	HCD	1	0	1	1	110	4.20677	0	0	5.19571	50	2	864.877	1728.75	-1.71352	39.5539	22034	22034	MS2	18/28	20130120_Brassica_A2.raw
	High	VQLADQYLNEAALGDANADAIGR	Unambiguous	2	2	Bra000144 ;Bra017055		HCD	1	0	1	1	397	4.19839	0	0	18.2912	50	3	796.732	2388.18	1.27786	41.9258	23434	23434	MS2	28/88	20130120_Brassica_A1.raw
	High	GLAYDTSDDQQDITR	Unambiguous	1	1	Bra000144		HCD	1	0	1	1	193	4.16112	0	0	10.0577	39	2	849.383	1697.76	-1.91845	29.1755	16216	16216	MS2	19/28	20130120_Brassica_A3.raw
	High	VQLADQYLNEAALGDANADAIGR	Unambiguous	2	2	Bra000144 ;Bra017055		HCD	1	0	1	1	378	4.15939	0	0	0	3	3	796.73	2388.18	-1.2523	41.511	23285	23285	MS2	29/88	20130120_Brassica_A3.raw
	High	LmEYGNmLVmEQENVK	Unambiguous	3	3	Bra000144 ;Bra005019 ;Bra017055	M2(Oxidation); M7(Oxidation); M10(Oxidation)	HCD	1	0	1	1	213	4.13092	0	0	0	45	2	988.445	1975.88	0.969627	31.9351	17762	17762	MS2	21/30	20130120_Brassica_A1.raw
	High	VQLADQYLNEAALGDANADAIGR	Unambiguous	2	2	Bra000144 ;Bra017055		HCD	1	0	1	1	377	4.112	0	0	20.0755	39	3	796.729	2388.17	-2.17237	41.8316	23466	23466	MS2	27/88	20130120_Brassica_A3.raw
	High	mccLFINDLDAGAGR	Unambiguous	2	2	Bra000144 ;Bra017055	M1(Oxidation); C2(Carbamidomethyl); C3(Carbamidomethyl)	HCD	1	0	1	1	106	4.10416	0	0	22.6015	18	2	864.878	1728.75	-1.14863	39.7315	22163	22163	MS2	18/28	20130120_Brassica_A4.raw
	High	mccLFINDLDAGAGR	Unambiguous	2	2	Bra000144 ;Bra017055	M1(Oxidation); C2(Carbamidomethyl); C3(Carbamidomethyl)	HCD	1	0	1	1	101	4.1015	0	0	12.8951	50	2	864.876	1728.74	-3.76128	39.6724	22110	22110	MS2	19/28	20130120_Brassica_A6.raw
	High	VQLADQYLNEAALGDANADAIGR	Unambiguous	2	2	Bra000144 ;Bra017055		HCD	1	0	1	1	292	4.07458	0	0	69.0678	50	2	1194.59	2388.17	-3.31682	92.0442	51660	51660	MS2	21/44	20130120_Brassica_A3.raw
	High	GLAYDTSDDQQDITR	Unambiguous	1	1	Bra000144		HCD	1	0	1	1	195	4.07199	0	0	0	46	2	849.385	1697.76	0.598082	29.3581	16243	16243	MS2	16/28	20130120_Brassica_A2.raw
	High	VPIIVTGNDFSTLYAPLIR	Unambiguous	3	3	Bra000144 ;Bra005019 ;Bra017055		HCD	1	0	1	1	62	4.05171	0	0		50	2	1045.09	2089.17	0.680464	50.563	28366	28366	MS2	17/36	20130120_Brassica_A3.raw
	High	GLAYDTSDDQQDITR	Unambiguous	1	1	Bra000144		HCD	1	0	1	1	206	4.04907	0	0	0	2	2	849.384	1697.76	-0.336628	28.9144	16063	16063	MS2	17/28	20130120_Brassica_A3.raw
	High	mGINPImmSAGELESGNAGEPAK	Unambiguous	3	3	Bra000144 ;Bra005019 ;Bra017055	M1(Oxidation); M7(Oxidation); M8(Oxidation)	HCD	1	0	1	1	176	4.04628	0	0	0	50	2	1176.53	2352.05	0.120428	34.8434	19379	19379	MS2	20/44	20130120_Brassica_A6.raw
	High	GLAYDTSDDQQDITR	Unambiguous	1	1	Bra000144		HCD	1	0	1	1	208	4.03762	0	0	0	50	2	849.384	1697.76	-0.696132	28.6789	15890	15890	MS2	17/28	20130120_Brassica_A1.raw
	High	VPIIVTGNDFSTLYAPLIR	Unambiguous	3	3	Bra000144 ;Bra005019 ;Bra017055		HCD	1	0	1	1	72	4.03602	0	0	0	50	2	1045.09	2089.17	2.54495	91.3212	51256	51256	MS2	17/36	20130120_Brassica_A3.raw
	High	GLAYDTSDDQQDITR	Unambiguous	1	1	Bra000144		HCD	1	0	1	1	206	4.03399	0	0	0	1	2	849.384	1697.76	-0.192826	28.941	16040	16040	MS2	17/28	20130120_Brassica_A1.raw
	High	LmEYGNmLVmEQENVKR	Unambiguous	3	3	Bra000144 ;Bra005019 ;Bra017055	M2(Oxidation); M7(Oxidation); M10(Oxidation)	HCD	1	0	1	1	288	4.01992	0	1	37.2006	22	3	711.332	2131.98	0.126515	30.5897	16945	16945	MS2	25/64	20130120_Brassica_A2.raw
	High	mGINPImmSAGELESGNAGEPAK	Unambiguous	3	3	Bra000144 ;Bra005019 ;Bra017055	M1(Oxidation); M7(Oxidation); M8(Oxidation)	HCD	1	0	1	1	172	4.01582	0	0	0	50	2	1176.53	2352.05	-1.22896	91.8347	51543	51543	MS2	19/44	20130120_Brassica_A3.raw
	High	GLAYDTSDDQQDITR	Unambiguous	1	1	Bra000144		HCD	1	0	1	1	202	4.00992	0	0	0	50	2	849.384	1697.76	-0.624231	29.4417	16217	16217	MS2	16/28	20130120_Brassica_A7.raw
	High	VPIIVTGNDFSTLYAPLIRDGR	Unambiguous	3	3	Bra000144 ;Bra005019 ;Bra017055		HCD	1	0	1	1	130	4.00577	0	1	3.73535	50	3	806.447	2417.33	3.70725	46.4494	26069	26069	MS2	27/84	20130120_Brassica_A3.raw
	High	VPIIVTGNDFSTLYAPLIR	Unambiguous	3	3	Bra000144 ;Bra005019 ;Bra017055		HCD	1	0	1	1	109	4.00152	0	0	6.26002	50	3	697.062	2089.17	0.785618	83.9566	47126	47126	MS2	26/72	20130120_Brassica_A3.raw
	High	VPIIVTGNDFSTLYAPLIR	Unambiguous	3	3	Bra000144 ;Bra005019 ;Bra017055		HCD	1	0	1	1	127	3.97596	0	0	0	50	3	697.061	2089.17	-1.05493	83.1643	46676	46676	MS2	28/72	20130120_Brassica_A3.raw
	High	VPIIVTGNDFSTLYAPLIR	Unambiguous	3	3	Bra000144 ;Bra005019 ;Bra017055		HCD	1	0	1	1	91	3.97344	0	0	0	50	2	1045.09	2089.16	-2.12945	82.6963	46414	46414	MS2	18/36	20130120_Brassica_A3.raw
	High	VQLADQYLNEAALGDANADAIGR	Unambiguous	2	2	Bra000144 ;Bra017055		HCD	1	0	1	1	274	3.96824	0	0	0	50	2	1194.59	2388.18	1.07903	92.4998	51914	51914	MS2	17/44	20130120_Brassica_A3.raw
	High	GLAYDTSDDQQDITR	Unambiguous	1	1	Bra000144		HCD	1	0	1	1	204	3.96295	0	0	0	42	2	849.384	1697.76	-0.911835	29.4907	16245	16245	MS2	15/28	20130120_Brassica_A7.raw
	High	GLAYDTSDDQQDITR	Unambiguous	1	1	Bra000144		HCD	1	0	1	1	193	3.95815	0	0	0	1	2	849.384	1697.76	0.0228759	29.091	16091	16091	MS2	16/28	20130120_Brassica_A2.raw
	High	GLAYDTSDDQQDITR	Unambiguous	1	1	Bra000144		HCD	1	0	1	1	210	3.94277	0	0	0	34	2	849.384	1697.76	-0.0490249	29.2077	16193	16193	MS2	17/28	20130120_Brassica_A1.raw
	High	VPIIVTGNDFSTLYAPLIR	Unambiguous	3	3	Bra000144 ;Bra005019 ;Bra017055		HCD	1	0	1	1	126	3.92382	0	0	10.2921	50	3	697.061	2089.17	-0.529059	84.2231	47275	47275	MS2	29/72	20130120_Brassica_A3.raw
	High	VPIIVTGNDFSTLYAPLIR	Unambiguous	3	3	Bra000144 ;Bra005019 ;Bra017055		HCD	1	0	1	1	127	3.91874	0	0	0	36	3	697.061	2089.17	-0.879639	49.6206	27684	27684	MS2	28/72	20130120_Brassica_A2.raw
	High	TDNVKDEDIVTLVDQFPGQSIDFFGALR	Unambiguous	1	1	Bra000144		HCD	1	0	1	1	411	3.90579	0	1	1.24097	50	3	1047.19	3139.56	0.989073	54.0314	30180	30180	MS2	29/108	20130120_Brassica_A4.raw
	High	GLAYDTSDDQQDITR	Unambiguous	1	1	Bra000144		HCD	1	0	1	1	196	3.87954	0	0	0.224009	1	2	849.385	1697.76	1.17329	29.1082	16119	16119	MS2	15/28	20130120_Brassica_A5.raw
	High	VPIIVTGNDFSTLYAPLIR	Unambiguous	3	3	Bra000144 ;Bra005019 ;Bra017055		HCD	1	0	1	1	101	3.86062	0	0	12.2766	50	2	1045.09	2089.17	-0.493407	49.7257	27773	27773	MS2	17/36	20130120_Brassica_A4.raw
	High	GLAYDTSDDQQDITR	Unambiguous	1	1	Bra000144		HCD	1	0	1	1	199	3.85428	0	0	0	50	2	849.383	1697.76	-2.06225	28.8325	15943	15943	MS2	16/28	20130120_Brassica_A2.raw
	High	mccLFINDLDAGAGR	Unambiguous	2	2	Bra000144 ;Bra017055	M1(Oxidation); C2(Carbamidomethyl); C3(Carbamidomethyl)	HCD	1	0	1	1	105	3.84897	0	0	60.433	50	2	864.878	1728.75	-0.795566	38.9359	21817	21817	MS2	16/28	20130120_Brassica_A3.raw
	High	VPIIVTGNDFSTLYAPLIR	Unambiguous	3	3	Bra000144 ;Bra005019 ;Bra017055		HCD	1	0	1	1	56	3.84193	0	0	0	50	2	1045.09	2089.18	3.24611	50.1759	28062	28062	MS2	18/36	20130120_Brassica_A1.raw
	High	VPIIVTGNDFSTLYAPLIR	Unambiguous	3	3	Bra000144 ;Bra005019 ;Bra017055		HCD	1	0	1	1	108	3.80333	0	0	6.46816	50	3	697.062	2089.17	0.435038	82.8946	46526	46526	MS2	28/72	20130120_Brassica_A3.raw
	High	mGINPImmSAGELESGNAGEPAK	Unambiguous	3	3	Bra000144 ;Bra005019 ;Bra017055	M1(Oxidation); M7(Oxidation); M8(Oxidation)	HCD	1	0	1	1	199	3.7969	0	0	0	50	2	1176.53	2352.06	2.7154	35.1026	19526	19526	MS2	18/44	20130120_Brassica_A6.raw
	High	VPIIVTGNDFSTLYAPLIR	Unambiguous	3	3	Bra000144 ;Bra005019 ;Bra017055		HCD	1	0	1	1	67	3.77819	0	0	0	50	2	1045.09	2089.17	1.14263	90.5417	50821	50821	MS2	19/36	20130120_Brassica_A3.raw
	High	mccLFINDLDAGAGR	Unambiguous	2	2	Bra000144 ;Bra017055	M1(Oxidation); C2(Carbamidomethyl); C3(Carbamidomethyl)	HCD	1	0	1	1	115	3.76878	0	0	13.455	29	2	864.879	1728.75	0.616672	39.2014	21967	21967	MS2	19/28	20130120_Brassica_A3.raw
	High	mGINPImmSAGELESGNAGEPAK	Unambiguous	3	3	Bra000144 ;Bra005019 ;Bra017055	M1(Oxidation); M7(Oxidation); M8(Oxidation)	HCD	1	0	1	1	184	3.76224	0	0	42.4792	50	2	1176.53	2352.05	0.0166286	91.855	51555	51555	MS2	19/44	20130120_Brassica_A3.raw
	High	VPIIVTGNDFSTLYAPLIR	Unambiguous	3	3	Bra000144 ;Bra005019 ;Bra017055		HCD	1	0	1	1	128	3.74839	0	0	6.31167	50	3	697.06	2089.17	-1.93138	83.6947	46978	46978	MS2	27/72	20130120_Brassica_A3.raw
	High	GLAYDTSDDQQDITR	Unambiguous	1	1	Bra000144		HCD	1	0	1	1	204	3.74049	0	0	0	50	2	849.386	1697.77	2.4675	29.3741	16270	16270	MS2	15/28	20130120_Brassica_A5.raw
	High	VPIIVTGNDFSTLYAPLIR	Unambiguous	3	3	Bra000144 ;Bra005019 ;Bra017055		HCD	1	0	1	1	110	3.72383	0	0	3.61139	50	3	697.061	2089.17	-0.178478	49.6121	27709	27709	MS2	30/72	20130120_Brassica_A4.raw
	High	TDNVKDEDIVTLVDQFPGQSIDFFGALR	Unambiguous	1	1	Bra000144		HCD	1	0	1	1	392	3.70617	0	1	0	50	3	1047.19	3139.57	2.3888	54.0381	30191	30191	MS2	20/108	20130120_Brassica_A6.raw
	High	LmEYGNmLVmEQENVK	Unambiguous	3	3	Bra000144 ;Bra005019 ;Bra017055	M2(Oxidation); M7(Oxidation); M10(Oxidation)	HCD	1	0	1	1	216	3.68066	0	0	9.43354	50	2	988.444	1975.88	0.228265	32.0786	17795	17795	MS2	19/30	20130120_Brassica_A2.raw
	High	GLAYDTSDDQQDITR	Unambiguous	1	1	Bra000144		HCD	1	0	1	1	223	3.66317	0	0	68.2061	50	2	849.388	1697.77	4.5526	91.7112	51475	51475	MS2	15/28	20130120_Brassica_A3.raw
	High	VPLILGIWGGK	Unambiguous	2	2	Bra000144 ;Bra005019		HCD	1	0	1	1	33	3.63945	0	0	5.23902	11	1	1152.71	1152.71	-0.972198	46.3756	26026	26026	MS2	18/20	20130120_Brassica_A3.raw
	High	LmEYGNmLVmEQENVKR	Unambiguous	3	3	Bra000144 ;Bra005019 ;Bra017055	M2(Oxidation); M7(Oxidation); M10(Oxidation)	HCD	1	0	1	1	283	3.63798	0	1	47.1051	39	3	711.331	2131.98	-1.84885	30.3794	16866	16866	MS2	23/64	20130120_Brassica_A1.raw
	High	GLAYDTSDDQQDITR	Unambiguous	1	1	Bra000144		HCD	1	0	1	1	198	3.62517	0	0	0	50	2	849.383	1697.76	-1.70274	28.8454	15970	15970	MS2	15/28	20130120_Brassica_A5.raw
	High	GLAYDTSDDQQDITR	Unambiguous	1	1	Bra000144		HCD	1	0	1	1	201	3.61644	0	0	0	24	2	849.382	1697.76	-2.99696	29.4367	16369	16369	MS2	18/28	20130120_Brassica_A3.raw
	High	VQLADQYLNEAALGDANADAIGR	Unambiguous	2	2	Bra000144 ;Bra017055		HCD	1	0	1	1	387	3.60515	0	0	63.1338	50	3	796.733	2388.19	2.65794	92.3176	51812	51812	MS2	25/88	20130120_Brassica_A3.raw
	High	mGINPImmSAGELESGNAGEPAK	Unambiguous	3	3	Bra000144 ;Bra005019 ;Bra017055	M1(Oxidation); M7(Oxidation); M8(Oxidation)	HCD	1	0	1	1	177	3.59455	0	0	0	50	2	1176.53	2352.05	0.639422	34.5244	19189	19189	MS2	20/44	20130120_Brassica_A2.raw
	High	VPIIVTGNDFSTLYAPLIR	Unambiguous	3	3	Bra000144 ;Bra005019 ;Bra017055		HCD	1	0	1	1	104	3.53745	0	0	7.69314	23	3	697.061	2089.17	0.259748	49.8804	27857	27857	MS2	26/72	20130120_Brassica_A4.raw
	High	GLAYDTSDDQQDITR	Unambiguous	1	1	Bra000144		HCD	1	0	1	1	207	3.53495	0	0	26.8145	50	2	849.382	1697.76	-2.70936	92.0308	51653	51653	MS2	16/28	20130120_Brassica_A3.raw
	High	VQLADQYLNEAALGDANADAIGR	Unambiguous	2	2	Bra000144 ;Bra017055		HCD	1	0	1	1	387	3.52842	0	0	0	50	3	796.732	2388.18	0.664487	41.9392	23224	23224	MS2	25/88	20130120_Brassica_A7.raw
	High	GKGmVDSVFQAPmGTGTHNAVLSSYEYISQGLK	Unambiguous	3	3	Bra000144 ;Bra005019 ;Bra017055	M4(Oxidation); M13(Oxidation)	HCD	1	0	1	1	372	3.50536	0	1	0	50	3	1168.9	3504.68	1.23452	43.7621	24469	24469	MS2	25/128	20130120_Brassica_A1.raw
	High	KFVEGLGVEK	Unambiguous	3	3	Bra000144 ;Bra005019 ;Bra017055		HCD	1	0	1	1	226	3.49253	0	1	0	27	1	1105.62	1105.62	-1.88341	26.3284	14545	14545	MS2	18/18	20130120_Brassica_A3.raw
	High	mccLFINDLDAGAGR	Unambiguous	2	2	Bra000144 ;Bra017055	M1(Oxidation); C2(Carbamidomethyl); C3(Carbamidomethyl)	HCD	1	0	1	1	107	3.48592	0	0	17.5718	50	2	864.879	1728.75	-0.23067	39.3597	21962	21962	MS2	18/28	20130120_Brassica_A5.raw
	High	VPIIVTGNDFSTLYAPLIR	Unambiguous	3	3	Bra000144 ;Bra005019 ;Bra017055		HCD	1	0	1	1	125	3.47845	0	0	0	32	3	697.061	2089.17	-0.529059	49.909	27845	27845	MS2	26/72	20130120_Brassica_A2.raw
	High	LmEYGNmLVmEQENVK	Unambiguous	3	3	Bra000144 ;Bra005019 ;Bra017055	M2(Oxidation); M7(Oxidation); M10(Oxidation)	HCD	1	0	1	1	214	3.44586	0	0	0	50	2	988.444	1975.88	-0.265976	32.1454	17834	17834	MS2	16/30	20130120_Brassica_A6.raw
	High	LmEYGNmLVmEQENVK	Unambiguous	3	3	Bra000144 ;Bra005019 ;Bra017055	M2(Oxidation); M7(Oxidation); M10(Oxidation)	HCD	1	0	1	1	231	3.43843	0	0	44.2032	28	3	659.299	1975.88	1.17905	31.988	17793	17793	MS2	21/60	20130120_Brassica_A1.raw
	High	VPIIVTGNDFSTLYAPLIR	Unambiguous	3	3	Bra000144 ;Bra005019 ;Bra017055		HCD	1	0	1	1	89	3.43381	0	0		50	3	697.064	2089.18	3.41809	50.8421	28522	28522	MS2	25/72	20130120_Brassica_A3.raw
	High	mGINPImmSAGELESGNAGEPAK	Unambiguous	3	3	Bra000144 ;Bra005019 ;Bra017055	M1(Oxidation); M7(Oxidation); M8(Oxidation)	HCD	1	0	1	1	187	3.43153	0	0	54.6611	50	3	784.687	2352.05	-2.24672	34.8446	19428	19428	MS2	22/88	20130120_Brassica_A1.raw
	High	VPIIVTGNDFSTLYAPLIR	Unambiguous	3	3	Bra000144 ;Bra005019 ;Bra017055		HCD	1	0	1	1	53	3.41892	0	0	0	50	2	1045.09	2089.17	1.61007	84.7681	47581	47581	MS2	16/36	20130120_Brassica_A3.raw
	High	EGPPVFEQPAmTLEK	Unambiguous	1	1	Bra000144	M11(Oxidation)	HCD	1	0	1	1	304	3.41106	0	0	33.124	48	2	844.914	1688.82	0.662172	34.8854	19421	19421	MS2	16/28	20130120_Brassica_A5.raw
	High	AAQQVNLPVPEGcTDPQADNFDPTAR	Unambiguous	1	1	Bra000144	C13(Carbamidomethyl)	HCD	1	0	1	1	210	3.38871	0	0	0	50	2	1406.15	2811.3	0.157773	37.9585	21130	21130	MS2	18/50	20130120_Brassica_A2.raw
	High	VPLILGIWGGK	Unambiguous	2	2	Bra000144 ;Bra005019		HCD	1	0	1	1	37	3.37498	0	0	25.4809	50	1	1152.71	1152.71	0.298581	46.1064	25877	25877	MS2	17/20	20130120_Brassica_A3.raw
	High	EGPPVFEQPAmTLEK	Unambiguous	1	1	Bra000144	M11(Oxidation)	HCD	1	0	1	1	288	3.36277	0	0	2.13022	3	2	844.913	1688.82	-1.07258	34.6303	19276	19276	MS2	21/28	20130120_Brassica_A5.raw
	High	GLAYDTSDDQQDITR	Unambiguous	1	1	Bra000144		HCD	1	0	1	1	167	3.35329	0	0	100	50	1	1697.76	1697.76	-2.80929	28.6575	15913	15913	MS2	19/28	20130120_Brassica_A3.raw
	High	mGINPImmSAGELESGNAGEPAK	Unambiguous	3	3	Bra000144 ;Bra005019 ;Bra017055	M1(Oxidation); M7(Oxidation); M8(Oxidation)	HCD	1	0	1	1	236	3.33755	0	0	29.2005	50	3	784.69	2352.06	2.11284	34.9615	19446	19446	MS2	23/88	20130120_Brassica_A6.raw
	High	EGPPVFEQPAmTLEK	Unambiguous	1	1	Bra000144	M11(Oxidation)	HCD	1	0	1	1	317	3.33344	0	0	10.6399	39	2	844.915	1688.82	1.09586	91.4951	51352	51352	MS2	20/28	20130120_Brassica_A3.raw
	High	VPIIVTGNDFSTLYAPLIR	Unambiguous	3	3	Bra000144 ;Bra005019 ;Bra017055		HCD	1	0	1	1	125	3.31107	0	0	5.79854	50	3	697.061	2089.17	-0.704349	49.6293	27756	27756	MS2	26/72	20130120_Brassica_A1.raw
	High	SFQcELVmAK	Unambiguous	3	3	Bra000144 ;Bra005019 ;Bra017055	C4(Carbamidomethyl); M8(Oxidation)	HCD	1	0	1	1	174	3.28275	0	0	0	50	1	1228.57	1228.57	-1.03587	30.0633	16733	16733	MS2	15/18	20130120_Brassica_A3.raw
	High	VQLADQYLNEAALGDANADAIGR	Unambiguous	2	2	Bra000144 ;Bra017055		HCD	1	0	1	1	384	3.28006	0	0	9.27301	50	3	796.734	2388.19	3.11797	42.0634	23482	23482	MS2	23/88	20130120_Brassica_A4.raw
	High	VPIIVTGNDFSTLYAPLIR	Unambiguous	3	3	Bra000144 ;Bra005019 ;Bra017055		HCD	1	0	1	1	125	3.27491	0	0	0	18	3	697.06	2089.17	-1.31787	49.7915	27936	27936	MS2	28/72	20130120_Brassica_A3.raw
	High	VPIIVTGNDFSTLYAPLIR	Unambiguous	3	3	Bra000144 ;Bra005019 ;Bra017055		HCD	1	0	1	1	45	3.25638	0	0	0	50	2	1045.09	2089.17	0.324614	85.7061	48106	48106	MS2	14/36	20130120_Brassica_A3.raw
	High	VPIIVTGNDFSTLYAPLIR	Unambiguous	3	3	Bra000144 ;Bra005019 ;Bra017055		HCD	1	0	1	1	60	3.25192	0	0	0	50	2	1045.09	2089.17	0.324614	85.0264	47725	47725	MS2	15/36	20130120_Brassica_A3.raw
	High	VPIIVTGNDFSTLYAPLIR	Unambiguous	3	3	Bra000144 ;Bra005019 ;Bra017055		HCD	1	0	1	1	55	3.24342	0	0	0	50	2	1045.09	2089.17	1.84379	90.2849	50678	50678	MS2	15/36	20130120_Brassica_A3.raw
	High	FVEGLGVEK	Unambiguous	3	3	Bra000144 ;Bra005019 ;Bra017055		HCD	1	0	1	1	347	3.24212	0	0	0	33	1	977.532	977.532	1.86511	29.3087	16224	16224	MS2	16/16	20130120_Brassica_A4.raw
	High	EGPPVFEQPAmTLEK	Unambiguous	1	1	Bra000144	M11(Oxidation)	HCD	1	0	1	1	288	3.20957	0	0	0	4	2	844.914	1688.82	0.156203	34.0547	19043	19043	MS2	20/28	20130120_Brassica_A3.raw
	High	VQLADQYLNEAALGDANADAIGR	Unambiguous	2	2	Bra000144 ;Bra017055		HCD	1	0	1	1	372	3.20277	0	0	6.9167	50	3	796.732	2388.18	0.741158	92.5774	51956	51956	MS2	21/88	20130120_Brassica_A3.raw
	High	EGPPVFEQPAMTLEK	Unambiguous	1	1	Bra000144		HCD	1	0	1	1	322	3.20246	0	0	23.7343	46	2	836.917	1672.83	0.766556	37.6246	21072	21072	MS2	18/28	20130120_Brassica_A3.raw
	High	LmEYGNmLVmEQENVKR	Unambiguous	3	3	Bra000144 ;Bra005019 ;Bra017055	M2(Oxidation); M7(Oxidation); M10(Oxidation)	HCD	1	0	1	1	288	3.20003	0	1	73.8977	30	3	711.331	2131.98	-1.59119	30.161	16790	16790	MS2	21/64	20130120_Brassica_A3.raw
	High	LmEYGNmLVmEQENVK	Unambiguous	3	3	Bra000144 ;Bra005019 ;Bra017055	M2(Oxidation); M7(Oxidation); M10(Oxidation)	HCD	1	0	1	1	227	3.19618	0	0	70.0275	12	3	659.299	1975.88	0.0670097	31.5083	17572	17572	MS2	23/60	20130120_Brassica_A3.raw
	High	GLAYDTSDDQQDITR	Unambiguous	1	1	Bra000144		HCD	1	0	1	1	182	3.19569	0	0	0	50	2	849.379	1697.75	-5.80112	28.7911	15927	15927	MS2	15/28	20130120_Brassica_A4.raw
	High	EGPPVFEQPAmTLEK	Unambiguous	1	1	Bra000144	M11(Oxidation)	HCD	1	0	1	1	297	3.19418	0	0	1.24118	2	2	844.913	1688.82	-0.349767	35.0925	19510	19510	MS2	20/28	20130120_Brassica_A2.raw
	High	FVEGLGVEK	Unambiguous	3	3	Bra000144 ;Bra005019 ;Bra017055		HCD	1	0	1	1	269	3.18749	0	0	27.3473	29	1	977.531	977.531	0.429034	28.7345	15958	15958	MS2	16/16	20130120_Brassica_A3.raw
	High	KFVEGLGVEK	Unambiguous	3	3	Bra000144 ;Bra005019 ;Bra017055		HCD	0.1478	0	1	1	219	3.17648	0	1	5.73068	2	2	553.316	1105.62	-1.28833	26.3144	14537	14537	MS2	18/18	20130120_Brassica_A3.raw
	High	GLAYDTSDDQQDITR	Unambiguous	1	1	Bra000144		HCD	1	0	1	1	217	3.15177	0	0	0	50	2	849.385	1697.76	1.02949	29.4966	16359	16359	MS2	14/28	20130120_Brassica_A1.raw
	High	NFLTLPNIKVPLILGIWGGK	Unambiguous	2	2	Bra000144 ;Bra005019		HCD	1	0	1	1	8	3.14234	0	1	18.2402	50	2	1097.16	2193.32	0.799361	54.5885	30612	30612	MS2	15/38	20130120_Brassica_A3.raw
	High	GmVDSVFQAPmGTGTHNAVLSSYEYISQGLK	Unambiguous	3	3	Bra000144 ;Bra005019 ;Bra017055	M2(Oxidation); M11(Oxidation)	HCD	1	0	1	1	427	3.13984	0	0	2.18637	17	3	1107.2	3319.58	5.41737	45.7972	25611	25611	MS2	21/120	20130120_Brassica_A1.raw
	High	AAQQVNLPVPEGcTDPQADNFDPTAR	Unambiguous	1	1	Bra000144	C13(Carbamidomethyl)	HCD	1	0	1	1	348	3.11941	0	0	18.5691	50	3	937.771	2811.3	-0.433197	37.7215	21056	21056	MS2	24/100	20130120_Brassica_A1.raw
	High	mGINPImmSAGELESGNAGEPAK	Unambiguous	3	3	Bra000144 ;Bra005019 ;Bra017055	M1(Oxidation); M7(Oxidation); M8(Oxidation)	HCD	1	0	1	1	194	3.11504	0	0	0	50	2	1176.53	2352.06	3.54578	34.5789	19229	19229	MS2	15/44	20130120_Brassica_A6.raw
	High	EGPPVFEQPAmTLEK	Unambiguous	1	1	Bra000144	M11(Oxidation)	HCD	1	0	1	1	282	3.10599	0	0	1.54828	4	2	844.914	1688.82	0.300766	34.7476	19372	19372	MS2	19/28	20130120_Brassica_A1.raw
	High	AAQQVNLPVPEGcTDPQADNFDPTAR	Unambiguous	1	1	Bra000144	C13(Carbamidomethyl)	HCD	1	0	1	1	218	3.09853	0	0	0	50	2	1406.15	2811.3	-1.31855	37.5912	21053	21053	MS2	15/50	20130120_Brassica_A3.raw
	High	LmEYGNmLVmEQENVKR	Unambiguous	3	3	Bra000144 ;Bra005019 ;Bra017055	M2(Oxidation); M7(Oxidation); M10(Oxidation)	HCD	1	0	1	1	245	3.0962	0	1	0	50	2	1066.49	2131.98	-2.38648	30.2896	16795	16795	MS2	15/32	20130120_Brassica_A5.raw
	High	VPIIVTGNDFSTLYAPLIR	Unambiguous	3	3	Bra000144 ;Bra005019 ;Bra017055		HCD	1	0	1	1	102	3.09533	0	0	20.8438	50	3	697.062	2089.17	1.66207	84.7427	47568	47568	MS2	23/72	20130120_Brassica_A3.raw
	High	SFQcELVmAK	Unambiguous	3	3	Bra000144 ;Bra005019 ;Bra017055	C4(Carbamidomethyl); M8(Oxidation)	HCD	1	0	1	1	190	3.07207	0	0	0	39	1	1228.57	1228.57	-2.02947	30.574	16951	16951	MS2	13/18	20130120_Brassica_A4.raw
	High	VPIIVTGNDFSTLYAPLIR	Unambiguous	3	3	Bra000144 ;Bra005019 ;Bra017055		HCD	1	0	1	1	105	3.0621	0	0	4.66931	50	3	697.061	2089.17	0.172103	49.5767	27689	27689	MS2	23/72	20130120_Brassica_A6.raw
	High	EGPPVFEQPAmTLEK	Unambiguous	1	1	Bra000144	M11(Oxidation)	HCD	1	0	1	1	295	3.05014	0	0	43.4051	44	2	844.913	1688.82	-0.422049	34.3239	19102	19102	MS2	18/28	20130120_Brassica_A5.raw
	High	VPIIVTGNDFSTLYAPLIR	Unambiguous	3	3	Bra000144 ;Bra005019 ;Bra017055		HCD	1	0	1	1	108	3.00303	0	0	28.0088	50	3	697.062	2089.17	1.31149	69.0583	38633	38633	MS2	23/72	20130120_Brassica_A5.raw
	High	VQLADQYLNEAALGDANADAIGR	Unambiguous	2	2	Bra000144 ;Bra017055		HCD	1	0	1	1	221	3.00111	0	0	0	50	2	1194.59	2388.18	0.46566	92.7719	52064	52064	MS2	13/44	20130120_Brassica_A3.raw
	High	FVEGLGVEK	Unambiguous	3	3	Bra000144 ;Bra005019 ;Bra017055		HCD	1	0	1	1	266	3.00023	0	0	0	50	1	977.531	977.531	1.17829	29.1985	16189	16189	MS2	14/16	20130120_Brassica_A1.raw
	High	KFVEGLGVEK	Unambiguous	3	3	Bra000144 ;Bra005019 ;Bra017055		HCD	1	0	1	1	227	2.94899	0	1	9.24465	8	2	553.316	1105.63	0.036576	26.8655	14841	14841	MS2	17/18	20130120_Brassica_A1.raw
	High	EGPPVFEQPAmTLEK	Unambiguous	1	1	Bra000144	M11(Oxidation)	HCD	1	0	1	1	306	2.94412	0	0	27.3987	50	2	844.913	1688.82	-0.422049	34.8296	19362	19362	MS2	19/28	20130120_Brassica_A2.raw
	High	EGPPVFEQPAmTLEK	Unambiguous	1	1	Bra000144	M11(Oxidation)	HCD	1	0	1	1	292	2.93272	0	0	1.63506	5	2	844.913	1688.82	-1.07258	34.477	19217	19217	MS2	20/28	20130120_Brassica_A1.raw
	High	AAQQVNLPVPEGcTDPQADNFDPTAR	Unambiguous	1	1	Bra000144	C13(Carbamidomethyl)	HCD	1	0	1	1	387	2.9222	0	0	10.8043	50	3	937.774	2811.31	2.17208	38.1594	21274	21274	MS2	28/100	20130120_Brassica_A4.raw
	High	SFQcELVmAK	Unambiguous	3	3	Bra000144 ;Bra005019 ;Bra017055	C4(Carbamidomethyl); M8(Oxidation)	HCD	1	0	1	1	192	2.91101	0	0	0	50	1	1228.57	1228.57	0.553889	30.879	17110	17110	MS2	13/18	20130120_Brassica_A2.raw
	High	EGPPVFEQPAmTLEK	Unambiguous	1	1	Bra000144	M11(Oxidation)	HCD	1	0	1	1	277	2.90451	0	0	0.30658	1	2	844.914	1688.82	0.228484	34.3216	19196	19196	MS2	19/28	20130120_Brassica_A3.raw
	High	EGPPVFEQPAmTLEK	Unambiguous	1	1	Bra000144	M11(Oxidation)	HCD	1	0	1	1	309	2.89613	0	0	34.477	50	2	844.913	1688.82	-0.783456	34.5867	19250	19250	MS2	17/28	20130120_Brassica_A4.raw
	High	MGINPIMMSAGELESGNAGEPAK	Unambiguous	3	3	Bra000144 ;Bra005019 ;Bra017055		HCD	1	0	1	1	235	2.89236	0	0	0	50	2	1152.53	2304.05	-9.25303	32.521	18156	18156	MS2	14/44	20130120_Brassica_A3.raw
	High	EGPPVFEQPAmTLEK	Unambiguous	1	1	Bra000144	M11(Oxidation)	HCD	1	0	1	1	286	2.89163	0	0	0.861319	5	2	844.913	1688.82	-0.277486	34.8457	19396	19396	MS2	19/28	20130120_Brassica_A4.raw
	High	mccLFINDLDAGAGR	Unambiguous	2	2	Bra000144 ;Bra017055	M1(Oxidation); C2(Carbamidomethyl); C3(Carbamidomethyl)	HCD	1	0	1	1	109	2.88753	0	0	47.1252	50	2	864.877	1728.75	-2.41964	39.8408	22195	22195	MS2	16/28	20130120_Brassica_A2.raw
	High	VPIIVTGNDFSTLYAPLIR	Unambiguous	3	3	Bra000144 ;Bra005019 ;Bra017055		HCD	1	0	1	1	119	2.88618	0	0	13.2929	50	3	697.06	2089.17	-1.14258	50.4058	28279	28279	MS2	21/72	20130120_Brassica_A3.raw
	High	KFVEGLGVEK	Unambiguous	3	3	Bra000144 ;Bra005019 ;Bra017055		HCD	1	0	1	1	285	2.8804	0	1	5.26103	5	2	553.316	1105.63	0.257393	26.9005	14850	14850	MS2	17/18	20130120_Brassica_A5.raw
	High	VPIIVTGNDFSTLYAPLIR	Unambiguous	3	3	Bra000144 ;Bra005019 ;Bra017055		HCD	1	0	1	1	55	2.85454	0	0	0	50	2	1045.09	2089.17	0.207754	91.0583	51109	51109	MS2	14/36	20130120_Brassica_A3.raw
	High	GLAYDTSDDQQDITR	Unambiguous	1	1	Bra000144		HCD	1	0	1	1	210	2.84987	0	0	24.5287	50	2	849.384	1697.76	-0.48043	92.3014	51803	51803	MS2	13/28	20130120_Brassica_A3.raw
	High	EGPPVFEQPAmTLEK	Unambiguous	1	1	Bra000144	M11(Oxidation)	HCD	1	0	1	1	308	2.84138	0	0	10.0565	50	2	844.914	1688.82	0.0116402	92.0092	51640	51640	MS2	17/28	20130120_Brassica_A3.raw
	High	FYWAPTREDR	Unambiguous	3	3	Bra000144 ;Bra005019 ;Bra017055		HCD	1	0	1	1	244	2.83766	0	1	24.9232	14	2	670.823	1340.64	-0.386673	30.0182	16707	16707	MS2	12/18	20130120_Brassica_A3.raw
	High	mGINPImmSAGELESGNAGEPAK	Unambiguous	3	3	Bra000144 ;Bra005019 ;Bra017055	M1(Oxidation); M7(Oxidation); M8(Oxidation)	HCD	1	0	1	1	236	2.83395	0	0	89.7474	41	3	784.69	2352.06	2.11284	34.6543	19386	19386	MS2	21/88	20130120_Brassica_A3.raw
	High	MGINPIMMSAGELESGNAGEPAK	Unambiguous	3	3	Bra000144 ;Bra005019 ;Bra017055		HCD	1	0	1	1	251	2.83386	0	0	11.0783	50	2	1152.53	2304.06	-4.48473	33.92	18967	18967	MS2	13/44	20130120_Brassica_A3.raw
	High	VPIIVTGNDFSTLYAPLIR	Unambiguous	3	3	Bra000144 ;Bra005019 ;Bra017055		HCD	1	0	1	1	34	2.8319	0	0	0	50	2	1045.09	2089.17	0.792054	50.395	28118	28118	MS2	13/36	20130120_Brassica_A2.raw
	High	VPLILGIWGGK	Unambiguous	2	2	Bra000144 ;Bra005019		HCD	1	0	1	1	25	2.82037	0	0	50.1461	50	1	1152.72	1152.72	6.54653	46.8534	26169	26169	MS2	16/20	20130120_Brassica_A4.raw
	High	VPIIVTGNDFSTLYAPLIR	Unambiguous	3	3	Bra000144 ;Bra005019 ;Bra017055		HCD	1	0	1	1	108	2.81651	0	0	18.4811	50	3	697.061	2089.17	-0.00318757	84.4791	47419	47419	MS2	29/72	20130120_Brassica_A3.raw
	High	KFVEGLGVEK	Unambiguous	3	3	Bra000144 ;Bra005019 ;Bra017055		HCD	1	0	1	1	215	2.81558	0	1	6.21954	2	2	553.316	1105.63	0.036576	27.0199	14906	14906	MS2	16/18	20130120_Brassica_A4.raw
	High	mGINPImmSAGELESGNAGEPAK	Unambiguous	3	3	Bra000144 ;Bra005019 ;Bra017055	M1(Oxidation); M7(Oxidation); M8(Oxidation)	HCD	1	0	1	1	127	2.80847	0	0		50	2	1176.53	2352.05	1.08912	35.0454	19541	19541	MS2	16/44	20130120_Brassica_A1.raw
	High	FVEGLGVEK	Unambiguous	3	3	Bra000144 ;Bra005019 ;Bra017055		HCD	1	0	1	1	265	2.80586	0	0	0	4	1	977.53	977.53	0.0544051	28.9911	16108	16108	MS2	16/16	20130120_Brassica_A3.raw
	High	EGPPVFEQPAmTLEK	Unambiguous	1	1	Bra000144	M11(Oxidation)	HCD	1	0	1	1	300	2.80225	0	0	15.9567	50	2	844.915	1688.82	1.96323	91.7511	51496	51496	MS2	14/28	20130120_Brassica_A3.raw
	High	KFVEGLGVEK	Unambiguous	3	3	Bra000144 ;Bra005019 ;Bra017055		HCD	1	0	1	1	231	2.79548	0	1	21.8236	36	2	553.316	1105.62	-1.17792	26.9693	14868	14868	MS2	17/18	20130120_Brassica_A2.raw
	High	GLAYDTSDDQQDITR	Unambiguous	1	1	Bra000144		HCD	1	0	1	1	191	2.79176	0	0	31.2764	50	2	849.384	1697.76	-0.336628	92.5937	51965	51965	MS2	13/28	20130120_Brassica_A3.raw
	High	EGPPVFEQPAmTLEK	Unambiguous	1	1	Bra000144	M11(Oxidation)	HCD	1	0	1	1	283	2.7689	0	0	0	5	2	844.914	1688.82	0.662172	35.1141	19549	19549	MS2	17/28	20130120_Brassica_A4.raw
	High	SFQcELVmAK	Unambiguous	3	3	Bra000144 ;Bra005019 ;Bra017055	C4(Carbamidomethyl); M8(Oxidation)	HCD	1	0	1	1	191	2.74939	0	0	0	32	1	1228.57	1228.57	0.25581	30.7289	17047	17047	MS2	13/18	20130120_Brassica_A5.raw
	High	NFLTLPNIK	Unambiguous	3	3	Bra000144 ;Bra005019 ;Bra017055		HCD	1	0	1	1	204	2.72807	0	0	0	14	1	1059.62	1059.62	0.114906	41.237	23014	23014	MS2	14/16	20130120_Brassica_A4.raw
	High	MGINPIMMSAGELESGNAGEPAK	Unambiguous	3	3	Bra000144 ;Bra005019 ;Bra017055		HCD	1	0	1	1	242	2.72213	0	0	0	50	2	1152.53	2304.05	-7.45167	34.3085	19189	19189	MS2	13/44	20130120_Brassica_A3.raw
	High	VPIIVTGNDFSTLYAPLIR	Unambiguous	3	3	Bra000144 ;Bra005019 ;Bra017055		HCD	1	0	1	1	117	2.72001	0	0	30.6412	50	3	697.06	2089.17	-1.84374	50.2062	28013	28013	MS2	19/72	20130120_Brassica_A2.raw
	High	VPIIVTGNDFSTLYAPLIR	Unambiguous	3	3	Bra000144 ;Bra005019 ;Bra017055		HCD	1	0	1	1	51	2.71981	0	0	3.22842	50	2	1045.09	2089.17	-0.259687	90.8003	50965	50965	MS2	13/36	20130120_Brassica_A3.raw
	High	VPIIVTGNDFSTLYAPLIR	Unambiguous	3	3	Bra000144 ;Bra005019 ;Bra017055		HCD	1	0	1	1	141	2.67391	0	0	0	50	3	697.06	2089.16	-2.45726	50.1345	28128	28128	MS2	21/72	20130120_Brassica_A3.raw
	High	VQLADQYLNEAALGDANADAIGR	Unambiguous	2	2	Bra000144 ;Bra017055		HCD	1	0	1	1	315	2.6629	0	0	12.3144	50	3	796.728	2388.17	-3.93582	93.122	52258	52258	MS2	16/88	20130120_Brassica_A3.raw
	High	VPIIVTGNDFSTLYAPLIR	Unambiguous	3	3	Bra000144 ;Bra005019 ;Bra017055		HCD	1	0	1	1	51	2.66153	0	0	0	50	2	1045.09	2089.17	1.37635	52.002	29170	29170	MS2	11/36	20130120_Brassica_A3.raw
	High	mGINPImmSAGELESGNAGEPAK	Unambiguous	3	3	Bra000144 ;Bra005019 ;Bra017055	M1(Oxidation); M7(Oxidation); M8(Oxidation)	HCD	1	0	1	1	130	2.65268	0	0	0	50	2	1176.53	2352.05	-1.95556	92.1292	51708	51708	MS2	12/44	20130120_Brassica_A3.raw
	High	VQLADQYLNEAALGDANADAIGR	Unambiguous	2	2	Bra000144 ;Bra017055		HCD	1	0	1	1	226	2.65075	0	0	2.781	50	2	1194.6	2388.19	3.63474	41.9498	23229	23229	MS2	12/44	20130120_Brassica_A7.raw
	High	VPIIVTGNDFSTLYAPLIR	Unambiguous	3	3	Bra000144 ;Bra005019 ;Bra017055		HCD	1	0	1	1	127	2.61786	0	0	46.146	50	3	697.061	2089.17	-0.616704	82.605	46363	46363	MS2	24/72	20130120_Brassica_A3.raw
	High	FVEGLGVEK	Unambiguous	3	3	Bra000144 ;Bra005019 ;Bra017055		HCD	1	0	1	1	265	2.6121	0	0	0	50	1	977.531	977.531	1.05341	29.333	16248	16248	MS2	14/16	20130120_Brassica_A5.raw
	High	VPIIVTGNDFSTLYAPLIR	Unambiguous	3	3	Bra000144 ;Bra005019 ;Bra017055		HCD	1	0	1	1	60	2.57651	0	0	0	50	2	1045.09	2089.17	2.07751	85.9806	48260	48260	MS2	12/36	20130120_Brassica_A3.raw
	High	EGPPVFEQPAmTLEK	Unambiguous	1	1	Bra000144	M11(Oxidation)	HCD	1	0	1	1	332	2.56039	0	0	18.1131	50	2	844.915	1688.82	1.38499	35.4045	19687	19687	MS2	18/28	20130120_Brassica_A2.raw
Bra017055	rubisco activase	1046.92	53.27	1	6	21	241	443	48.5115	7.72314
	Confidence Level	Sequence	PSM Ambiguity	# Proteins	# Protein Groups	Protein Group Accessions	Modifications	Activation Type	ΔScore	ΔCn	Rank	Search Engine Rank	Peptides Matched	XCorr	Probability	# Missed Cleavages	Isolation Interference [%]	Ion Inject Time [ms]	Charge	m/z [Da]	MH+ [Da]	ΔM [ppm]	RT [min]	First Scan	Last Scan	MS Order	Ions Matched	Spectrum File
	High	VQLADQYLNEAALGDANADAIGR	Unambiguous	2	2	Bra000144 ;Bra017055		HCD	1	0	1	1	330	7.19438	0	0	6.94901	50	2	1194.6	2388.19	2.81691	41.8271	23378	23378	MS2	32/44	20130120_Brassica_A1.raw
	High	VQLADQYLNEAALGDANADAIGR	Unambiguous	2	2	Bra000144 ;Bra017055		HCD	1	0	1	1	313	7.06812	0	0	0	50	2	1194.59	2388.18	1.18126	41.461	23149	23149	MS2	31/44	20130120_Brassica_A5.raw
	High	RVQLADQYLNEAALGDANADAIGR	Unambiguous	2	2	Bra000144 ;Bra017055		HCD	1	0	1	1	374	7.03052	0	1	11.208	50	3	848.765	2544.28	-0.185918	39.0758	21821	21821	MS2	35/92	20130120_Brassica_A1.raw
	High	VQLADQYLNEAALGDANADAIGR	Unambiguous	2	2	Bra000144 ;Bra017055		HCD	1	0	1	1	301	6.98468	0	0	0.996529	22	2	1194.59	2388.18	1.28349	41.7078	23248	23248	MS2	31/44	20130120_Brassica_A2.raw
	High	RVQLADQYLNEAALGDANADAIGR	Unambiguous	2	2	Bra000144 ;Bra017055		HCD	1	0	1	1	380	6.98462	0	1	0	50	3	848.764	2544.28	-1.26543	39.121	21827	21827	MS2	35/92	20130120_Brassica_A5.raw
	High	VQLADQYLNEAALGDANADAIGR	Unambiguous	2	2	Bra000144 ;Bra017055		HCD	1	0	1	1	307	6.95573	0	0	0	26	2	1194.6	2388.18	1.99909	41.5567	23226	23226	MS2	32/44	20130120_Brassica_A1.raw
	High	RVQLADQYLNEAALGDANADAIGR	Unambiguous	2	2	Bra000144 ;Bra017055		HCD	1	0	1	1	374	6.95099	0	1	1.59794	6	3	848.765	2544.28	-0.185918	38.7996	21740	21740	MS2	34/92	20130120_Brassica_A3.raw
	High	VQLADQYLNEAALGDANADAIGR	Unambiguous	2	2	Bra000144 ;Bra017055		HCD	1	0	1	1	331	6.89621	0	0	0	50	2	1194.59	2388.18	0.874575	42.0513	23476	23476	MS2	30/44	20130120_Brassica_A4.raw
	High	RVQLADQYLNEAALGDANADAIGR	Unambiguous	2	2	Bra000144 ;Bra017055		HCD	1	0	1	1	377	6.83305	0	1	2.57659	47	3	848.764	2544.28	-0.833626	39.5415	22055	22055	MS2	34/92	20130120_Brassica_A4.raw
	High	VQLADQYLNEAALGDANADAIGR	Unambiguous	2	2	Bra000144 ;Bra017055		HCD	1	0	1	1	319	6.68188	0	0	0	3	2	1194.59	2388.18	-0.658857	41.5058	23281	23281	MS2	30/44	20130120_Brassica_A3.raw
	High	VQLADQYLNEAALGDANADAIGR	Unambiguous	2	2	Bra000144 ;Bra017055		HCD	1	0	1	1	328	6.6372	0	0	0	6	2	1194.59	2388.18	-0.147712	41.2432	23131	23131	MS2	30/44	20130120_Brassica_A3.raw
	High	GmVDSVFQAPmGTGTHNAVLSSYEYISQGLK	Unambiguous	3	3	Bra000144 ;Bra005019 ;Bra017055	M2(Oxidation); M11(Oxidation)	HCD	1	0	1	1	403	6.52793	0	0	0	43	3	1107.19	3319.56	0.342719	45.6205	25603	25603	MS2	34/120	20130120_Brassica_A3.raw
	High	VQLADQYLNEAALGDANADAIGR	Unambiguous	2	2	Bra000144 ;Bra017055		HCD	1	0	1	1	323	6.51394	0	0	0	50	2	1194.59	2388.18	1.07903	91.5006	51356	51356	MS2	30/44	20130120_Brassica_A3.raw
	High	GmVDSVFQAPmGTGTHNAVLSSYEYISQGLK	Unambiguous	3	3	Bra000144 ;Bra005019 ;Bra017055	M2(Oxidation); M11(Oxidation)	HCD	1	0	1	1	408	6.39358	0	0	2.32085	40	3	1107.19	3319.56	-1.09143	91.5336	51375	51375	MS2	35/120	20130120_Brassica_A3.raw
	High	VQLADQYLNEAALGDANADAIGR	Unambiguous	2	2	Bra000144 ;Bra017055		HCD	1	0	1	1	331	6.31631	0	0	0	50	2	1194.6	2388.18	1.59017	42.0107	23419	23419	MS2	28/44	20130120_Brassica_A2.raw
	High	VQLADQYLNEAALGDANADAIGR	Unambiguous	2	2	Bra000144 ;Bra017055		HCD	1	0	1	1	398	6.23773	0	0	1.11173	36	3	796.731	2388.18	-0.0255569	41.5673	23231	23231	MS2	34/88	20130120_Brassica_A1.raw
	High	VQLADQYLNEAALGDANADAIGR	Unambiguous	2	2	Bra000144 ;Bra017055		HCD	1	0	1	1	377	6.13844	0	0	2.55443	27	3	796.73	2388.18	-1.09896	41.2406	23129	23129	MS2	33/88	20130120_Brassica_A3.raw
	High	VQLADQYLNEAALGDANADAIGR	Unambiguous	2	2	Bra000144 ;Bra017055		HCD	1	0	1	1	395	5.9188	0	0	5.63412	50	3	796.732	2388.18	0.434472	41.6975	23243	23243	MS2	32/88	20130120_Brassica_A2.raw
	High	IKDEDIVTLVDQFPGQSIDFFGALR	Unambiguous	1	1	Bra017055		HCD	1	0	1	1	303	5.90005	0	1	1.08972	50	3	941.823	2823.45	-1.24148	54.0882	30335	30335	MS2	31/96	20130120_Brassica_A3.raw
	High	VQLADQYLNEAALGDANADAIGR	Unambiguous	2	2	Bra000144 ;Bra017055		HCD	1	0	1	1	319	5.86302	0	0	0	50	2	1194.59	2388.18	-0.965544	41.7829	23324	23324	MS2	29/44	20130120_Brassica_A4.raw
	High	mGINPImmSAGELESGNAGEPAK	Unambiguous	3	3	Bra000144 ;Bra005019 ;Bra017055	M1(Oxidation); M7(Oxidation); M8(Oxidation)	HCD	1	0	1	1	181	5.84896	0	0	0	32	2	1176.53	2352.05	0.431824	34.7768	19388	19388	MS2	24/44	20130120_Brassica_A1.raw
	High	mGINPImmSAGELESGNAGEPAK	Unambiguous	3	3	Bra000144 ;Bra005019 ;Bra017055	M1(Oxidation); M7(Oxidation); M8(Oxidation)	HCD	1	0	1	1	183	5.84045	0	0	0.91798	4	2	1176.53	2352.05	-0.294769	34.3363	19204	19204	MS2	24/44	20130120_Brassica_A3.raw
	High	VQLADQYLNEAALGDANADAIGR	Unambiguous	2	2	Bra000144 ;Bra017055		HCD	1	0	1	1	337	5.82291	0	0	32.564	50	2	1194.6	2388.18	2.10132	41.7294	23299	23299	MS2	28/44	20130120_Brassica_A5.raw
	High	mGINPImmSAGELESGNAGEPAK	Unambiguous	3	3	Bra000144 ;Bra005019 ;Bra017055	M1(Oxidation); M7(Oxidation); M8(Oxidation)	HCD	1	0	1	1	182	5.79084	0	0	0	21	2	1176.53	2352.05	0.224227	34.5847	19250	19250	MS2	26/44	20130120_Brassica_A5.raw
	High	VPIIVTGNDFSTLYAPLIR	Unambiguous	3	3	Bra000144 ;Bra005019 ;Bra017055		HCD	1	0	1	1	94	5.75755	0	0	2.28233	22	2	1045.09	2089.17	-0.493407	49.2477	27631	27631	MS2	21/36	20130120_Brassica_A3.raw
	High	mGINPImmSAGELESGNAGEPAK	Unambiguous	3	3	Bra000144 ;Bra005019 ;Bra017055	M1(Oxidation); M7(Oxidation); M8(Oxidation)	HCD	1	0	1	1	182	5.75728	0	0	0	50	2	1176.53	2352.05	-0.0871704	34.8722	19414	19414	MS2	27/44	20130120_Brassica_A5.raw
	High	mGINPImmSAGELESGNAGEPAK	Unambiguous	3	3	Bra000144 ;Bra005019 ;Bra017055	M1(Oxidation); M7(Oxidation); M8(Oxidation)	HCD	1	0	1	1	191	5.75344	0	0	0	14	2	1176.53	2352.05	1.36601	34.6043	19357	19357	MS2	23/44	20130120_Brassica_A3.raw
	High	mGINPImmSAGELESGNAGEPAK	Unambiguous	3	3	Bra000144 ;Bra005019 ;Bra017055	M1(Oxidation); M7(Oxidation); M8(Oxidation)	HCD	1	0	1	1	159	5.74057	0	0	0	43	2	1176.53	2352.05	-1.43656	34.0512	18947	18947	MS2	23/44	20130120_Brassica_A5.raw
	High	mGINPImmSAGELESGNAGEPAK	Unambiguous	3	3	Bra000144 ;Bra005019 ;Bra017055	M1(Oxidation); M7(Oxidation); M8(Oxidation)	HCD	1	0	1	1	174	5.71007	0	0	0	50	2	1176.53	2352.05	-0.398568	33.8077	18903	18903	MS2	22/44	20130120_Brassica_A3.raw
	High	VQLADQYLNEAALGDANADAIGR	Unambiguous	2	2	Bra000144 ;Bra017055		HCD	1	0	1	1	312	5.68456	0	0	0	18	2	1194.6	2388.19	5.47484	41.8086	23319	23319	MS2	29/44	20130120_Brassica_A6.raw
	High	mGINPImmSAGELESGNAGEPAK	Unambiguous	3	3	Bra000144 ;Bra005019 ;Bra017055	M1(Oxidation); M7(Oxidation); M8(Oxidation)	HCD	1	0	1	1	189	5.64755	0	0	0	3	2	1176.53	2352.05	0.431824	34.0691	19051	19051	MS2	24/44	20130120_Brassica_A3.raw
	High	mGINPImmSAGELESGNAGEPAK	Unambiguous	3	3	Bra000144 ;Bra005019 ;Bra017055	M1(Oxidation); M7(Oxidation); M8(Oxidation)	HCD	1	0	1	1	192	5.63886	0	0	0	47	2	1176.53	2352.05	1.26221	34.359	19120	19120	MS2	26/44	20130120_Brassica_A4.raw
	High	mGINPImmSAGELESGNAGEPAK	Unambiguous	3	3	Bra000144 ;Bra005019 ;Bra017055	M1(Oxidation); M7(Oxidation); M8(Oxidation)	HCD	1	0	1	1	198	5.58158	0	0	0	17	2	1176.53	2352.06	1.67741	34.7929	19340	19340	MS2	23/44	20130120_Brassica_A2.raw
	High	mGINPImmSAGELESGNAGEPAK	Unambiguous	3	3	Bra000144 ;Bra005019 ;Bra017055	M1(Oxidation); M7(Oxidation); M8(Oxidation)	HCD	1	0	1	1	203	5.57143	0	0	4.05666	22	3	784.688	2352.05	-0.611883	34.72	19324	19324	MS2	33/88	20130120_Brassica_A4.raw
	High	IKDEDIVTLVDQFPGQSIDFFGALR	Unambiguous	1	1	Bra017055		HCD	1	0	1	1	313	5.54959	0	1	1.75672	50	3	941.823	2823.45	-0.657813	54.0539	30206	30206	MS2	32/96	20130120_Brassica_A5.raw
	High	mGINPImmSAGELESGNAGEPAK	Unambiguous	3	3	Bra000144 ;Bra005019 ;Bra017055	M1(Oxidation); M7(Oxidation); M8(Oxidation)	HCD	1	0	1	1	202	5.542	0	0	6.87408	50	2	1176.53	2352.06	2.0926	91.5632	51391	51391	MS2	24/44	20130120_Brassica_A3.raw
	High	VQLADQYLNEAALGDANADAIGR	Unambiguous	2	2	Bra000144 ;Bra017055		HCD	1	0	1	1	398	5.53069	0	0	8.82075	50	3	796.733	2388.19	2.73461	41.977	23400	23400	MS2	33/88	20130120_Brassica_A2.raw
	High	LmEYGNmLVmEQENVKR	Unambiguous	3	3	Bra000144 ;Bra005019 ;Bra017055	M2(Oxidation); M7(Oxidation); M10(Oxidation)	HCD	1	0	1	1	292	5.49936	0	1	2.07275	5	3	711.333	2131.98	0.641825	30.311	16808	16808	MS2	28/64	20130120_Brassica_A5.raw
	High	mGINPImmSAGELESGNAGEPAK	Unambiguous	3	3	Bra000144 ;Bra005019 ;Bra017055	M1(Oxidation); M7(Oxidation); M8(Oxidation)	HCD	1	0	1	1	212	5.49838	0	0	11.399	25	3	784.689	2352.05	0.555856	34.4574	19176	19176	MS2	34/88	20130120_Brassica_A4.raw
	High	mGINPImmSAGELESGNAGEPAK	Unambiguous	3	3	Bra000144 ;Bra005019 ;Bra017055	M1(Oxidation); M7(Oxidation); M8(Oxidation)	HCD	1	0	1	1	188	5.4974	0	0	0	10	2	1176.53	2352.05	1.15842	34.6251	19270	19270	MS2	23/44	20130120_Brassica_A4.raw
	High	mGINPImmSAGELESGNAGEPAK	Unambiguous	3	3	Bra000144 ;Bra005019 ;Bra017055	M1(Oxidation); M7(Oxidation); M8(Oxidation)	HCD	1	0	1	1	201	5.45803	0	0	0	19	2	1176.53	2352.06	1.78121	34.2557	19091	19091	MS2	23/44	20130120_Brassica_A1.raw
	High	mGINPImmSAGELESGNAGEPAK	Unambiguous	3	3	Bra000144 ;Bra005019 ;Bra017055	M1(Oxidation); M7(Oxidation); M8(Oxidation)	HCD	1	0	1	1	209	5.45448	0	0	0	26	2	1176.53	2352.06	2.3002	35.1627	19577	19577	MS2	24/44	20130120_Brassica_A4.raw
	High	VQLADQYLNEAALGDANADAIGR	Unambiguous	2	2	Bra000144 ;Bra017055		HCD	1	0	1	1	328	5.4117	0	0	0	50	2	1194.59	2388.18	1.48795	40.6088	22771	22771	MS2	28/44	20130120_Brassica_A3.raw
	High	LmEYGNmLVmEQENVKR	Unambiguous	3	3	Bra000144 ;Bra005019 ;Bra017055	M2(Oxidation); M7(Oxidation); M10(Oxidation)	HCD	1	0	1	1	295	5.40869	0	1	13.496	12	3	711.332	2131.98	-0.646451	29.9997	16622	16622	MS2	27/64	20130120_Brassica_A4.raw
	High	mGINPImmSAGELESGNAGEPAK	Unambiguous	3	3	Bra000144 ;Bra005019 ;Bra017055	M1(Oxidation); M7(Oxidation); M8(Oxidation)	HCD	1	0	1	1	170	5.40698	0	0	0	50	2	1176.53	2352.05	-0.606166	33.9879	18941	18941	MS2	27/44	20130120_Brassica_A1.raw
	High	mGINPImmSAGELESGNAGEPAK	Unambiguous	3	3	Bra000144 ;Bra005019 ;Bra017055	M1(Oxidation); M7(Oxidation); M8(Oxidation)	HCD	1	0	1	1	182	5.35548	0	0	1.55414	11	2	1176.53	2352.05	0.431824	34.8942	19424	19424	MS2	23/44	20130120_Brassica_A4.raw
	High	VQLADQYLNEAALGDANADAIGR	Unambiguous	2	2	Bra000144 ;Bra017055		HCD	1	0	1	1	379	5.3291	0	0	0	50	3	796.73	2388.17	-2.09569	41.7991	23333	23333	MS2	30/88	20130120_Brassica_A4.raw
	High	VPIIVTGNDFSTLYAPLIR	Unambiguous	3	3	Bra000144 ;Bra005019 ;Bra017055		HCD	1	0	1	1	84	5.3266	0	0	0	18	2	1045.09	2089.17	0.207754	49.6195	27749	27749	MS2	23/36	20130120_Brassica_A1.raw
	High	TDKIKDEDIVTLVDQFPGQSIDFFGALR	Unambiguous	1	1	Bra017055		HCD	1	0	1	1	334	5.30694	0	2	6.34554	23	4	792.662	3167.63	-0.0650651	52.1596	29257	29257	MS2	46/162	20130120_Brassica_A3.raw
	High	VPIIVTGNDFSTLYAPLIR	Unambiguous	3	3	Bra000144 ;Bra005019 ;Bra017055		HCD	1	0	1	1	97	5.30116	0	0	0	50	2	1045.09	2089.17	-1.07771	49.5973	27701	27701	MS2	21/36	20130120_Brassica_A4.raw
	High	VQLADQYLNEAALGDANADAIGR	Unambiguous	2	2	Bra000144 ;Bra017055		HCD	1	0	1	1	393	5.29903	0	0	24.1312	11	3	796.732	2388.18	1.35453	41.5112	23178	23178	MS2	33/88	20130120_Brassica_A5.raw
	High	RVQLADQYLNEAALGDANADAIGR	Unambiguous	2	2	Bra000144 ;Bra017055		HCD	1	0	1	1	372	5.27886	0	1	17.1332	50	3	848.767	2544.29	2.40491	39.0653	21891	21891	MS2	32/92	20130120_Brassica_A3.raw
	High	mGINPImmSAGELESGNAGEPAK	Unambiguous	3	3	Bra000144 ;Bra005019 ;Bra017055	M1(Oxidation); M7(Oxidation); M8(Oxidation)	HCD	1	0	1	1	190	5.27663	0	0	18.9273	41	3	784.687	2352.05	-2.86952	35.1975	19571	19571	MS2	29/88	20130120_Brassica_A2.raw
	High	mGINPImmSAGELESGNAGEPAK	Unambiguous	3	3	Bra000144 ;Bra005019 ;Bra017055	M1(Oxidation); M7(Oxidation); M8(Oxidation)	HCD	1	0	1	1	209	5.27591	0	0	3.79747	37	3	784.689	2352.05	0.0887609	34.5559	19262	19262	MS2	30/88	20130120_Brassica_A1.raw
	High	mGINPImmSAGELESGNAGEPAK	Unambiguous	3	3	Bra000144 ;Bra005019 ;Bra017055	M1(Oxidation); M7(Oxidation); M8(Oxidation)	HCD	1	0	1	1	216	5.25822	0	0	8.39722	31	3	784.689	2352.05	0.400158	33.8551	18930	18930	MS2	29/88	20130120_Brassica_A3.raw
	High	mGINPImmSAGELESGNAGEPAK	Unambiguous	3	3	Bra000144 ;Bra005019 ;Bra017055	M1(Oxidation); M7(Oxidation); M8(Oxidation)	HCD	1	0	1	1	189	5.24591	0	0	0	16	2	1176.53	2352.05	0.328025	34.5088	19235	19235	MS2	23/44	20130120_Brassica_A1.raw
	High	GKGmVDSVFQAPmGTGTHNAVLSSYEYISQGLK	Unambiguous	3	3	Bra000144 ;Bra005019 ;Bra017055	M4(Oxidation); M13(Oxidation)	HCD	1	0	1	1	382	5.23133	0	1	0	50	3	1168.9	3504.69	2.80189	91.6271	51427	51427	MS2	38/128	20130120_Brassica_A3.raw
	High	VPIIVTGNDFSTLYAPLIR	Unambiguous	3	3	Bra000144 ;Bra005019 ;Bra017055		HCD	1	0	1	1	108	5.21927	0	0	10.854	50	2	1045.08	2089.16	-3.29806	49.4405	27631	27631	MS2	23/36	20130120_Brassica_A5.raw
	High	GKGmVDSVFQAPmGTGTHNAVLSSYEYISQGLK	Unambiguous	3	3	Bra000144 ;Bra005019 ;Bra017055	M4(Oxidation); M13(Oxidation)	HCD	1	0	1	1	378	5.20778	0	1	0	47	3	1168.9	3504.67	-0.750833	43.585	24348	24348	MS2	36/128	20130120_Brassica_A5.raw
	High	VQLADQYLNEAALGDANADAIGR	Unambiguous	2	2	Bra000144 ;Bra017055		HCD	1	0	1	1	395	5.20465	0	0	26.6167	50	3	796.731	2388.18	0.281129	41.835	23333	23333	MS2	34/88	20130120_Brassica_A6.raw
	High	LmEYGNmLVmEQENVKR	Unambiguous	3	3	Bra000144 ;Bra005019 ;Bra017055	M2(Oxidation); M7(Oxidation); M10(Oxidation)	HCD	1	0	1	1	294	5.20393	0	1	5.80187	10	3	711.332	2131.98	-0.217026	30.3289	16797	16797	MS2	28/64	20130120_Brassica_A2.raw
	High	LmEYGNmLVmEQENVKR	Unambiguous	3	3	Bra000144 ;Bra005019 ;Bra017055	M2(Oxidation); M7(Oxidation); M10(Oxidation)	HCD	1	0	1	1	289	5.19573	0	1	11.5128	13	3	711.331	2131.98	-1.67707	29.4889	16401	16401	MS2	28/64	20130120_Brassica_A3.raw
	High	mGINPImmSAGELESGNAGEPAK	Unambiguous	3	3	Bra000144 ;Bra005019 ;Bra017055	M1(Oxidation); M7(Oxidation); M8(Oxidation)	HCD	1	0	1	1	177	5.19057	0	0	0	50	2	1176.53	2352.05	-0.294769	34.8786	19513	19513	MS2	24/44	20130120_Brassica_A3.raw
	High	mGINPImmSAGELESGNAGEPAK	Unambiguous	3	3	Bra000144 ;Bra005019 ;Bra017055	M1(Oxidation); M7(Oxidation); M8(Oxidation)	HCD	1	0	1	1	183	5.16187	0	0	0	15	2	1176.53	2352.05	0.535623	35.0673	19497	19497	MS2	26/44	20130120_Brassica_A2.raw
	High	mGINPImmSAGELESGNAGEPAK	Unambiguous	3	3	Bra000144 ;Bra005019 ;Bra017055	M1(Oxidation); M7(Oxidation); M8(Oxidation)	HCD	1	0	1	1	166	5.16077	0	0	0	13	2	1176.53	2352.05	-1.12516	34.316	19096	19096	MS2	23/44	20130120_Brassica_A5.raw
	High	VPIIVTGNDFSTLYAPLIR	Unambiguous	3	3	Bra000144 ;Bra005019 ;Bra017055		HCD	1	0	1	1	85	5.14785	0	0	0	50	2	1045.09	2089.17	-0.142827	83.2224	46708	46708	MS2	21/36	20130120_Brassica_A3.raw
	High	VQLADQYLNEAALGDANADAIGR	Unambiguous	2	2	Bra000144 ;Bra017055		HCD	1	0	1	1	377	5.14351	0	0	33.5204	50	3	796.73	2388.18	-1.09896	91.5034	51358	51358	MS2	32/88	20130120_Brassica_A3.raw
	High	VPIIVTGNDFSTLYAPLIR	Unambiguous	3	3	Bra000144 ;Bra005019 ;Bra017055		HCD	1	0	1	1	91	5.12571	0	0	0	50	2	1045.09	2089.17	-0.259687	82.9657	46564	46564	MS2	21/36	20130120_Brassica_A3.raw
	High	VPIIVTGNDFSTLYAPLIR	Unambiguous	3	3	Bra000144 ;Bra005019 ;Bra017055		HCD	1	0	1	1	83	5.09116	0	0	0.577892	9	2	1045.09	2089.17	0.558334	49.8429	27808	27808	MS2	21/36	20130120_Brassica_A2.raw
	High	LmEYGNmLVmEQENVKR	Unambiguous	3	3	Bra000144 ;Bra005019 ;Bra017055	M2(Oxidation); M7(Oxidation); M10(Oxidation)	HCD	1	0	1	1	271	5.05863	0	1	0	50	2	1066.49	2131.98	-0.210719	30.0412	16645	16645	MS2	22/32	20130120_Brassica_A4.raw
	High	mGINPImmSAGELESGNAGEPAK	Unambiguous	3	3	Bra000144 ;Bra005019 ;Bra017055	M1(Oxidation); M7(Oxidation); M8(Oxidation)	HCD	1	0	1	1	195	5.02866	0	0	1.30378	27	3	784.688	2352.05	-1.15683	34.3794	19132	19132	MS2	30/88	20130120_Brassica_A5.raw
	High	VPIIVTGNDFSTLYAPLIR	Unambiguous	3	3	Bra000144 ;Bra005019 ;Bra017055		HCD	1	0	1	1	95	5.02672	0	0	0	50	2	1045.09	2089.17	-1.66201	83.4894	46861	46861	MS2	20/36	20130120_Brassica_A3.raw
	High	mGINPImmSAGELESGNAGEPAK	Unambiguous	3	3	Bra000144 ;Bra005019 ;Bra017055	M1(Oxidation); M7(Oxidation); M8(Oxidation)	HCD	1	0	1	1	210	5.00741	0	0	2.39521	5	3	784.689	2352.05	-0.222636	34.1243	19084	19084	MS2	33/88	20130120_Brassica_A3.raw
	High	GKGmVDSVFQAPmGTGTHNAVLSSYEYISQGLK	Unambiguous	3	3	Bra000144 ;Bra005019 ;Bra017055	M4(Oxidation); M13(Oxidation)	HCD	1	0	1	1	388	4.99968	0	1	10.908	33	4	876.928	3504.69	3.37276	91.6442	51437	51437	MS2	43/192	20130120_Brassica_A3.raw
	High	mGINPImmSAGELESGNAGEPAK	Unambiguous	3	3	Bra000144 ;Bra005019 ;Bra017055	M1(Oxidation); M7(Oxidation); M8(Oxidation)	HCD	1	0	1	1	220	4.99966	0	0	1.21942	39	3	784.689	2352.05	0.867253	34.6241	19246	19246	MS2	31/88	20130120_Brassica_A2.raw
	High	mGINPImmSAGELESGNAGEPAK	Unambiguous	3	3	Bra000144 ;Bra005019 ;Bra017055	M1(Oxidation); M7(Oxidation); M8(Oxidation)	HCD	1	0	1	1	194	4.99868	0	0	21.1873	50	3	784.688	2352.05	-1.00113	34.0224	18961	18961	MS2	31/88	20130120_Brassica_A1.raw
	High	GmVDSVFQAPmGTGTHNAVLSSYEYISQGLK	Unambiguous	3	3	Bra000144 ;Bra005019 ;Bra017055	M2(Oxidation); M11(Oxidation)	HCD	1	0	1	1	394	4.99571	0	0	1.84698	50	3	1107.19	3319.55	-2.74622	45.966	25672	25672	MS2	32/120	20130120_Brassica_A4.raw
	High	VPIIVTGNDFSTLYAPLIR	Unambiguous	3	3	Bra000144 ;Bra005019 ;Bra017055		HCD	1	0	1	1	81	4.99487	0	0	0	50	2	1045.09	2089.17	0.792054	83.7428	47005	47005	MS2	20/36	20130120_Brassica_A3.raw
	High	mGINPImmSAGELESGNAGEPAK	Unambiguous	3	3	Bra000144 ;Bra005019 ;Bra017055	M1(Oxidation); M7(Oxidation); M8(Oxidation)	HCD	1	0	1	1	215	4.99142	0	0	0	29	3	784.689	2352.05	0.322309	34.2875	19109	19109	MS2	32/88	20130120_Brassica_A1.raw
	High	mGINPImmSAGELESGNAGEPAK	Unambiguous	3	3	Bra000144 ;Bra005019 ;Bra017055	M1(Oxidation); M7(Oxidation); M8(Oxidation)	HCD	1	0	1	1	211	4.97919	0	0	6.1087	12	3	784.689	2352.05	-0.144787	34.3847	19232	19232	MS2	27/88	20130120_Brassica_A3.raw
	High	LmEYGNmLVmEQENVKR	Unambiguous	3	3	Bra000144 ;Bra005019 ;Bra017055	M2(Oxidation); M7(Oxidation); M10(Oxidation)	HCD	1	0	1	1	249	4.95476	0	1	0	34	2	1066.49	2131.98	-1.12683	29.5017	16408	16408	MS2	21/32	20130120_Brassica_A3.raw
	High	LmEYGNmLVmEQENVKR	Unambiguous	3	3	Bra000144 ;Bra005019 ;Bra017055	M2(Oxidation); M7(Oxidation); M10(Oxidation)	HCD	1	0	1	1	287	4.95098	0	1	11.8776	50	3	711.334	2131.99	1.84421	30.2519	16751	16751	MS2	29/64	20130120_Brassica_A6.raw
	High	VPIIVTGNDFSTLYAPLIR	Unambiguous	3	3	Bra000144 ;Bra005019 ;Bra017055		HCD	1	0	1	1	102	4.94846	0	0	0	50	2	1045.09	2089.17	-0.843988	49.5751	27659	27659	MS2	22/36	20130120_Brassica_A2.raw
	High	VPIIVTGNDFSTLYAPLIR	Unambiguous	3	3	Bra000144 ;Bra005019 ;Bra017055		HCD	1	0	1	1	74	4.8952	0	0	2.93828	50	2	1045.09	2089.17	1.25949	49.348	27598	27598	MS2	21/36	20130120_Brassica_A1.raw
	High	RVQLADQYLNEAALGDANADAIGR	Unambiguous	2	2	Bra000144 ;Bra017055		HCD	1	0	1	1	389	4.88598	0	1	13.7978	50	3	848.762	2544.27	-4.00021	39.5619	22047	22047	MS2	29/92	20130120_Brassica_A6.raw
	High	IKDEDIVTLVDQFPGQSIDFFGALR	Unambiguous	1	1	Bra017055		HCD	1	0	1	1	288	4.88015	0	1	0	31	3	941.824	2823.46	0.314961	54.2404	30418	30418	MS2	31/96	20130120_Brassica_A3.raw
	High	VPIIVTGNDFSTLYAPLIR	Unambiguous	3	3	Bra000144 ;Bra005019 ;Bra017055		HCD	1	0	1	1	80	4.87487	0	0	22.0445	50	2	1045.09	2089.17	-0.0259664	49.5621	27681	27681	MS2	21/36	20130120_Brassica_A6.raw
	High	VPIIVTGNDFSTLYAPLIR	Unambiguous	3	3	Bra000144 ;Bra005019 ;Bra017055		HCD	1	0	1	1	101	4.844	0	0	0	50	2	1045.09	2089.16	-2.24631	51.1485	28693	28693	MS2	19/36	20130120_Brassica_A3.raw
	High	VPIIVTGNDFSTLYAPLIR	Unambiguous	3	3	Bra000144 ;Bra005019 ;Bra017055		HCD	1	0	1	1	75	4.83781	0	0	0.675388	6	2	1045.09	2089.17	0.792054	49.8631	27847	27847	MS2	20/36	20130120_Brassica_A4.raw
	High	LmEYGNmLVmEQENVKR	Unambiguous	3	3	Bra000144 ;Bra005019 ;Bra017055	M2(Oxidation); M7(Oxidation); M10(Oxidation)	HCD	1	0	1	1	294	4.81489	0	1	0.736484	2	3	711.332	2131.98	-0.302911	30.0968	16704	16704	MS2	27/64	20130120_Brassica_A1.raw
	High	GmVDSVFQAPmGTGTHNAVLSSYEYISQGLK	Unambiguous	3	3	Bra000144 ;Bra005019 ;Bra017055	M2(Oxidation); M11(Oxidation)	HCD	1	0	1	1	404	4.8135	0	0	10.657	22	3	1107.19	3319.56	0.453038	45.9171	25657	25657	MS2	30/120	20130120_Brassica_A5.raw
	High	LmEYGNmLVmEQENVK	Unambiguous	3	3	Bra000144 ;Bra005019 ;Bra017055	M2(Oxidation); M7(Oxidation); M10(Oxidation)	HCD	1	0	1	1	210	4.78926	0	0	0	50	2	988.444	1975.88	0.166485	31.458	17542	17542	MS2	22/30	20130120_Brassica_A3.raw
	High	mGINPImmSAGELESGNAGEPAK	Unambiguous	3	3	Bra000144 ;Bra005019 ;Bra017055	M1(Oxidation); M7(Oxidation); M8(Oxidation)	HCD	1	0	1	1	195	4.77713	0	0	3.542	35	3	784.687	2352.05	-1.85747	34.1013	18976	18976	MS2	31/88	20130120_Brassica_A5.raw
	High	VPIIVTGNDFSTLYAPLIR	Unambiguous	3	3	Bra000144 ;Bra005019 ;Bra017055		HCD	1	0	1	1	86	4.75163	0	0	0	1	2	1045.09	2089.17	-0.610267	49.5177	27782	27782	MS2	19/36	20130120_Brassica_A3.raw
	High	mGINPImmSAGELESGNAGEPAK	Unambiguous	3	3	Bra000144 ;Bra005019 ;Bra017055	M1(Oxidation); M7(Oxidation); M8(Oxidation)	HCD	1	0	1	1	198	4.65269	0	0	0	50	2	1176.53	2352.05	0.950819	35.1499	19666	19666	MS2	23/44	20130120_Brassica_A3.raw
	High	mGINPImmSAGELESGNAGEPAK	Unambiguous	3	3	Bra000144 ;Bra005019 ;Bra017055	M1(Oxidation); M7(Oxidation); M8(Oxidation)	HCD	1	0	1	1	209	4.63235	0	0	31.8384	34	3	784.689	2352.05	0.0109117	34.8963	19400	19400	MS2	32/88	20130120_Brassica_A2.raw
	High	LmEYGNmLVmEQENVK	Unambiguous	3	3	Bra000144 ;Bra005019 ;Bra017055	M2(Oxidation); M7(Oxidation); M10(Oxidation)	HCD	1	0	1	1	210	4.60066	0	0	0	48	2	988.442	1975.88	-2.42829	31.939	17741	17741	MS2	21/30	20130120_Brassica_A5.raw
	High	LmEYGNmLVmEQENVK	Unambiguous	3	3	Bra000144 ;Bra005019 ;Bra017055	M2(Oxidation); M7(Oxidation); M10(Oxidation)	HCD	1	0	1	1	213	4.5953	0	0	0	25	2	988.444	1975.88	-0.636658	31.7206	17692	17692	MS2	21/30	20130120_Brassica_A3.raw
	High	VPIIVTGNDFSTLYAPLIR	Unambiguous	3	3	Bra000144 ;Bra005019 ;Bra017055		HCD	0.4292	0	1	1	126	4.58553	0	0	5.08782	23	3	697.061	2089.17	-0.704349	49.2516	27634	27634	MS2	30/72	20130120_Brassica_A3.raw
	High	mGINPImmSAGELESGNAGEPAK	Unambiguous	3	3	Bra000144 ;Bra005019 ;Bra017055	M1(Oxidation); M7(Oxidation); M8(Oxidation)	HCD	1	0	1	1	162	4.55593	0	0		50	2	1176.53	2352.04	-2.99869	35.3326	19645	19645	MS2	23/44	20130120_Brassica_A2.raw
	High	NFLTLPNIKVPLILGVWGGK	Unambiguous	1	1	Bra017055		HCD	1	0	1	1	22	4.55591	0	1	52.1758	50	3	727.104	2179.3	-0.702562	53.5648	30042	30042	MS2	29/76	20130120_Brassica_A3.raw
	High	mGINPImmSAGELESGNAGEPAK	Unambiguous	3	3	Bra000144 ;Bra005019 ;Bra017055	M1(Oxidation); M7(Oxidation); M8(Oxidation)	HCD	1	0	1	1	186	4.55486	0	0	12.5308	38	3	784.687	2352.05	-2.40242	34.8082	19377	19377	MS2	29/88	20130120_Brassica_A5.raw
	High	LmEYGNmLVmEQENVKR	Unambiguous	3	3	Bra000144 ;Bra005019 ;Bra017055	M2(Oxidation); M7(Oxidation); M10(Oxidation)	HCD	1	0	1	1	294	4.55351	0	1	0.948267	1	3	711.332	2131.98	-0.217026	29.7461	16549	16549	MS2	27/64	20130120_Brassica_A3.raw
	High	IKDEDIVTLVDQFPGQSIDFFGALR	Unambiguous	1	1	Bra017055		HCD	1	0	1	1	306	4.52143	0	1	3.07418	50	3	941.823	2823.46	-0.333555	53.9696	30268	30268	MS2	28/96	20130120_Brassica_A3.raw
	High	VPIIVTGNDFSTLYAPLIR	Unambiguous	3	3	Bra000144 ;Bra005019 ;Bra017055		HCD	1	0	1	1	81	4.51503	0	0	0	50	2	1045.09	2089.17	1.02577	83.9995	47149	47149	MS2	19/36	20130120_Brassica_A3.raw
	High	VPIIVTGNDFSTLYAPLIR	Unambiguous	3	3	Bra000144 ;Bra005019 ;Bra017055		HCD	1	0	1	1	80	4.50294	0	0	0	8	2	1045.09	2089.17	-0.259687	49.7903	27935	27935	MS2	20/36	20130120_Brassica_A3.raw
	High	LmEYGNmLVmEQENVKR	Unambiguous	3	3	Bra000144 ;Bra005019 ;Bra017055	M2(Oxidation); M7(Oxidation); M10(Oxidation)	HCD	1	0	1	1	262	4.48598	0	1	0	7	2	1066.5	2131.98	0.476362	29.7613	16558	16558	MS2	20/32	20130120_Brassica_A3.raw
	High	RVQLADQYLNEAALGDANADAIGR	Unambiguous	2	2	Bra000144 ;Bra017055		HCD	1	0	1	1	255	4.46784	0	1	0	26	2	1272.64	2544.28	0.227183	38.8098	21745	21745	MS2	37/46	20130120_Brassica_A3.raw
	High	GmVDSVFQAPmGTGTHNAVLSSYEYISQGLK	Unambiguous	3	3	Bra000144 ;Bra005019 ;Bra017055	M2(Oxidation); M11(Oxidation)	HCD	1	0	1	1	403	4.44204	0	0	12.8389	50	3	1107.19	3319.56	-0.760472	45.3538	25454	25454	MS2	30/120	20130120_Brassica_A3.raw
	High	VPIIVTGNDFSTLYAPLIR	Unambiguous	3	3	Bra000144 ;Bra005019 ;Bra017055		HCD	1	0	1	1	71	4.43639	0	0	0	50	2	1045.09	2089.17	0.675194	84.2554	47293	47293	MS2	19/36	20130120_Brassica_A3.raw
	High	VPIIVTGNDFSTLYAPLIR	Unambiguous	3	3	Bra000144 ;Bra005019 ;Bra017055		HCD	1	0	1	1	127	4.42165	0	0	0	50	3	697.061	2089.17	-0.879639	49.4552	27639	27639	MS2	31/72	20130120_Brassica_A5.raw
	High	LmEYGNmLVmEQENVK	Unambiguous	3	3	Bra000144 ;Bra005019 ;Bra017055	M2(Oxidation); M7(Oxidation); M10(Oxidation)	HCD	1	0	1	1	227	4.41876	0	0	7.14033	47	2	988.444	1975.88	0.228265	32.2806	17930	17930	MS2	22/30	20130120_Brassica_A4.raw
	High	VPIIVTGNDFSTLYAPLIR	Unambiguous	3	3	Bra000144 ;Bra005019 ;Bra017055		HCD	1	0	1	1	103	4.37874	0	0	7.76635	29	2	1045.09	2089.17	-0.493407	49.7029	27759	27759	MS2	19/36	20130120_Brassica_A4.raw
	High	LmEYGNmLVMEQENVKR	Unambiguous	3	3	Bra000144 ;Bra005019 ;Bra017055	M2(Oxidation); M7(Oxidation)	HCD	0.3547	0	1	1	291	4.37321	0	1	2.39903	29	3	706.002	2115.99	1.30109	31.2719	17436	17436	MS2	24/64	20130120_Brassica_A3.raw
	High	VPIIVTGNDFSTLYAPLIR	Unambiguous	3	3	Bra000144 ;Bra005019 ;Bra017055		HCD	1	0	1	1	99	4.34608	0	0	33.0343	50	3	697.062	2089.17	1.57442	49.3507	27600	27600	MS2	27/72	20130120_Brassica_A1.raw
	High	GKGmVDSVFQAPmGTGTHNAVLSSYEYISQGLK	Unambiguous	3	3	Bra000144 ;Bra005019 ;Bra017055	M4(Oxidation); M13(Oxidation)	HCD	1	0	1	1	381	4.29157	0	1	5.89757	50	4	876.926	3504.68	1.77055	43.7418	24457	24457	MS2	40/192	20130120_Brassica_A1.raw
	High	mccLFINDLDAGAGR	Unambiguous	2	2	Bra000144 ;Bra017055	M1(Oxidation); C2(Carbamidomethyl); C3(Carbamidomethyl)	HCD	1	0	1	1	104	4.28816	0	0	11.2574	50	2	864.879	1728.75	0.0517771	39.3779	21994	21994	MS2	17/28	20130120_Brassica_A1.raw
	High	LmEYGNmLVmEQENVK	Unambiguous	3	3	Bra000144 ;Bra005019 ;Bra017055	M2(Oxidation); M7(Oxidation); M10(Oxidation)	HCD	1	0	1	1	246	4.26422	0	0	3.90509	49	2	988.448	1975.89	4.24396	32.342	17944	17944	MS2	21/30	20130120_Brassica_A2.raw
	High	VPIIVTGNDFSTLYAPLIR	Unambiguous	3	3	Bra000144 ;Bra005019 ;Bra017055		HCD	1	0	1	1	97	4.26422	0	0	0	50	2	1045.09	2089.17	-0.843988	84.5111	47437	47437	MS2	19/36	20130120_Brassica_A3.raw
	High	LmEYGNmLVmEQENVK	Unambiguous	3	3	Bra000144 ;Bra005019 ;Bra017055	M2(Oxidation); M7(Oxidation); M10(Oxidation)	HCD	1	0	1	1	215	4.25751	0	0	0	50	2	988.445	1975.88	0.784287	32.0184	17780	17780	MS2	21/30	20130120_Brassica_A4.raw
	High	GmVDSVFQAPmGTGTHNAVLSSYEYISQGLK	Unambiguous	3	3	Bra000144 ;Bra005019 ;Bra017055	M2(Oxidation); M11(Oxidation)	HCD	1	0	1	1	408	4.23342	0	0	0	50	3	1107.19	3319.57	1.77686	46.1157	25723	25723	MS2	27/120	20130120_Brassica_A2.raw
	High	VPIIVTGNDFSTLYAPLIR	Unambiguous	3	3	Bra000144 ;Bra005019 ;Bra017055		HCD	1	0	1	1	127	4.23342	0	0	0	50	3	697.061	2089.17	-0.967285	83.4271	46825	46825	MS2	30/72	20130120_Brassica_A3.raw
	High	GKGmVDSVFQAPmGTGTHNAVLSSYEYISQGLK	Unambiguous	3	3	Bra000144 ;Bra005019 ;Bra017055	M4(Oxidation); M13(Oxidation)	HCD	1	0	1	1	380	4.22302	0	1	2.34531	19	3	1168.9	3504.68	0.607564	43.0858	24179	24179	MS2	34/128	20130120_Brassica_A3.raw
	High	VPIIVTGNDFSTLYAPLIR	Unambiguous	3	3	Bra000144 ;Bra005019 ;Bra017055		HCD	1	0	1	1	125	4.21601	0	0	0	9	3	697.06	2089.17	-1.31787	49.5218	27785	27785	MS2	30/72	20130120_Brassica_A3.raw
	High	VPIIVTGNDFSTLYAPLIR	Unambiguous	3	3	Bra000144 ;Bra005019 ;Bra017055		HCD	1	0	1	1	71	4.21179	0	0	0	50	2	1045.09	2089.17	-0.142827	82.4377	46267	46267	MS2	18/36	20130120_Brassica_A3.raw
	High	mccLFINDLDAGAGR	Unambiguous	2	2	Bra000144 ;Bra017055	M1(Oxidation); C2(Carbamidomethyl); C3(Carbamidomethyl)	HCD	1	0	1	1	110	4.20677	0	0	5.19571	50	2	864.877	1728.75	-1.71352	39.5539	22034	22034	MS2	18/28	20130120_Brassica_A2.raw
	High	VQLADQYLNEAALGDANADAIGR	Unambiguous	2	2	Bra000144 ;Bra017055		HCD	1	0	1	1	397	4.19839	0	0	18.2912	50	3	796.732	2388.18	1.27786	41.9258	23434	23434	MS2	28/88	20130120_Brassica_A1.raw
	High	VQLADQYLNEAALGDANADAIGR	Unambiguous	2	2	Bra000144 ;Bra017055		HCD	1	0	1	1	378	4.15939	0	0	0	3	3	796.73	2388.18	-1.2523	41.511	23285	23285	MS2	29/88	20130120_Brassica_A3.raw
	High	LmEYGNmLVmEQENVK	Unambiguous	3	3	Bra000144 ;Bra005019 ;Bra017055	M2(Oxidation); M7(Oxidation); M10(Oxidation)	HCD	1	0	1	1	213	4.13092	0	0	0	45	2	988.445	1975.88	0.969627	31.9351	17762	17762	MS2	21/30	20130120_Brassica_A1.raw
	High	VQLADQYLNEAALGDANADAIGR	Unambiguous	2	2	Bra000144 ;Bra017055		HCD	1	0	1	1	377	4.112	0	0	20.0755	39	3	796.729	2388.17	-2.17237	41.8316	23466	23466	MS2	27/88	20130120_Brassica_A3.raw
	High	mccLFINDLDAGAGR	Unambiguous	2	2	Bra000144 ;Bra017055	M1(Oxidation); C2(Carbamidomethyl); C3(Carbamidomethyl)	HCD	1	0	1	1	106	4.10416	0	0	22.6015	18	2	864.878	1728.75	-1.14863	39.7315	22163	22163	MS2	18/28	20130120_Brassica_A4.raw
	High	mccLFINDLDAGAGR	Unambiguous	2	2	Bra000144 ;Bra017055	M1(Oxidation); C2(Carbamidomethyl); C3(Carbamidomethyl)	HCD	1	0	1	1	101	4.1015	0	0	12.8951	50	2	864.876	1728.74	-3.76128	39.6724	22110	22110	MS2	19/28	20130120_Brassica_A6.raw
	High	VQLADQYLNEAALGDANADAIGR	Unambiguous	2	2	Bra000144 ;Bra017055		HCD	1	0	1	1	292	4.07458	0	0	69.0678	50	2	1194.59	2388.17	-3.31682	92.0442	51660	51660	MS2	21/44	20130120_Brassica_A3.raw
	High	VPIIVTGNDFSTLYAPLIR	Unambiguous	3	3	Bra000144 ;Bra005019 ;Bra017055		HCD	1	0	1	1	62	4.05171	0	0		50	2	1045.09	2089.17	0.680464	50.563	28366	28366	MS2	17/36	20130120_Brassica_A3.raw
	High	mGINPImmSAGELESGNAGEPAK	Unambiguous	3	3	Bra000144 ;Bra005019 ;Bra017055	M1(Oxidation); M7(Oxidation); M8(Oxidation)	HCD	1	0	1	1	176	4.04628	0	0	0	50	2	1176.53	2352.05	0.120428	34.8434	19379	19379	MS2	20/44	20130120_Brassica_A6.raw
	High	VPIIVTGNDFSTLYAPLIR	Unambiguous	3	3	Bra000144 ;Bra005019 ;Bra017055		HCD	1	0	1	1	72	4.03602	0	0	0	50	2	1045.09	2089.17	2.54495	91.3212	51256	51256	MS2	17/36	20130120_Brassica_A3.raw
	High	LmEYGNmLVmEQENVKR	Unambiguous	3	3	Bra000144 ;Bra005019 ;Bra017055	M2(Oxidation); M7(Oxidation); M10(Oxidation)	HCD	1	0	1	1	288	4.01992	0	1	37.2006	22	3	711.332	2131.98	0.126515	30.5897	16945	16945	MS2	25/64	20130120_Brassica_A2.raw
	High	mGINPImmSAGELESGNAGEPAK	Unambiguous	3	3	Bra000144 ;Bra005019 ;Bra017055	M1(Oxidation); M7(Oxidation); M8(Oxidation)	HCD	1	0	1	1	172	4.01582	0	0	0	50	2	1176.53	2352.05	-1.22896	91.8347	51543	51543	MS2	19/44	20130120_Brassica_A3.raw
	High	VPIIVTGNDFSTLYAPLIRDGR	Unambiguous	3	3	Bra000144 ;Bra005019 ;Bra017055		HCD	1	0	1	1	130	4.00577	0	1	3.73535	50	3	806.447	2417.33	3.70725	46.4494	26069	26069	MS2	27/84	20130120_Brassica_A3.raw
	High	VPIIVTGNDFSTLYAPLIR	Unambiguous	3	3	Bra000144 ;Bra005019 ;Bra017055		HCD	1	0	1	1	109	4.00152	0	0	6.26002	50	3	697.062	2089.17	0.785618	83.9566	47126	47126	MS2	26/72	20130120_Brassica_A3.raw
	High	VPIIVTGNDFSTLYAPLIR	Unambiguous	3	3	Bra000144 ;Bra005019 ;Bra017055		HCD	1	0	1	1	127	3.97596	0	0	0	50	3	697.061	2089.17	-1.05493	83.1643	46676	46676	MS2	28/72	20130120_Brassica_A3.raw
	High	VPIIVTGNDFSTLYAPLIR	Unambiguous	3	3	Bra000144 ;Bra005019 ;Bra017055		HCD	1	0	1	1	91	3.97344	0	0	0	50	2	1045.09	2089.16	-2.12945	82.6963	46414	46414	MS2	18/36	20130120_Brassica_A3.raw
	High	GLAYDmSDDQQDITR	Unambiguous	1	1	Bra017055	M6(Oxidation)	HCD	1	0	1	1	109	3.97244	0	0	1.27241	7	2	872.379	1743.75	0.545548	28.5916	15874	15874	MS2	16/28	20130120_Brassica_A3.raw
	High	VQLADQYLNEAALGDANADAIGR	Unambiguous	2	2	Bra000144 ;Bra017055		HCD	1	0	1	1	274	3.96824	0	0	0	50	2	1194.59	2388.18	1.07903	92.4998	51914	51914	MS2	17/44	20130120_Brassica_A3.raw
	High	VPIIVTGNDFSTLYAPLIR	Unambiguous	3	3	Bra000144 ;Bra005019 ;Bra017055		HCD	1	0	1	1	126	3.92382	0	0	10.2921	50	3	697.061	2089.17	-0.529059	84.2231	47275	47275	MS2	29/72	20130120_Brassica_A3.raw
	High	VPIIVTGNDFSTLYAPLIR	Unambiguous	3	3	Bra000144 ;Bra005019 ;Bra017055		HCD	1	0	1	1	127	3.91874	0	0	0	36	3	697.061	2089.17	-0.879639	49.6206	27684	27684	MS2	28/72	20130120_Brassica_A2.raw
	High	VPIIVTGNDFSTLYAPLIR	Unambiguous	3	3	Bra000144 ;Bra005019 ;Bra017055		HCD	1	0	1	1	101	3.86062	0	0	12.2766	50	2	1045.09	2089.17	-0.493407	49.7257	27773	27773	MS2	17/36	20130120_Brassica_A4.raw
	High	mccLFINDLDAGAGR	Unambiguous	2	2	Bra000144 ;Bra017055	M1(Oxidation); C2(Carbamidomethyl); C3(Carbamidomethyl)	HCD	1	0	1	1	105	3.84897	0	0	60.433	50	2	864.878	1728.75	-0.795566	38.9359	21817	21817	MS2	16/28	20130120_Brassica_A3.raw
	High	GLAYDmSDDQQDITR	Unambiguous	1	1	Bra017055	M6(Oxidation)	HCD	1	0	1	1	107	3.84888	0	0	23.4302	6	2	872.378	1743.75	-0.294506	28.3343	15725	15725	MS2	16/28	20130120_Brassica_A3.raw
	High	VPIIVTGNDFSTLYAPLIR	Unambiguous	3	3	Bra000144 ;Bra005019 ;Bra017055		HCD	1	0	1	1	56	3.84193	0	0	0	50	2	1045.09	2089.18	3.24611	50.1759	28062	28062	MS2	18/36	20130120_Brassica_A1.raw
	High	GLAYDmSDDQQDITR	Unambiguous	1	1	Bra017055	M6(Oxidation)	HCD	1	0	1	1	100	3.8165	0	0	19.9868	19	2	872.378	1743.75	-0.154497	28.6965	15872	15872	MS2	16/28	20130120_Brassica_A4.raw
	High	VPIIVTGNDFSTLYAPLIR	Unambiguous	3	3	Bra000144 ;Bra005019 ;Bra017055		HCD	1	0	1	1	108	3.80333	0	0	6.46816	50	3	697.062	2089.17	0.435038	82.8946	46526	46526	MS2	28/72	20130120_Brassica_A3.raw
	High	mGINPImmSAGELESGNAGEPAK	Unambiguous	3	3	Bra000144 ;Bra005019 ;Bra017055	M1(Oxidation); M7(Oxidation); M8(Oxidation)	HCD	1	0	1	1	199	3.7969	0	0	0	50	2	1176.53	2352.06	2.7154	35.1026	19526	19526	MS2	18/44	20130120_Brassica_A6.raw
	High	VPIIVTGNDFSTLYAPLIR	Unambiguous	3	3	Bra000144 ;Bra005019 ;Bra017055		HCD	1	0	1	1	67	3.77819	0	0	0	50	2	1045.09	2089.17	1.14263	90.5417	50821	50821	MS2	19/36	20130120_Brassica_A3.raw
	High	mccLFINDLDAGAGR	Unambiguous	2	2	Bra000144 ;Bra017055	M1(Oxidation); C2(Carbamidomethyl); C3(Carbamidomethyl)	HCD	1	0	1	1	115	3.76878	0	0	13.455	29	2	864.879	1728.75	0.616672	39.2014	21967	21967	MS2	19/28	20130120_Brassica_A3.raw
	High	mGINPImmSAGELESGNAGEPAK	Unambiguous	3	3	Bra000144 ;Bra005019 ;Bra017055	M1(Oxidation); M7(Oxidation); M8(Oxidation)	HCD	1	0	1	1	184	3.76224	0	0	42.4792	50	2	1176.53	2352.05	0.0166286	91.855	51555	51555	MS2	19/44	20130120_Brassica_A3.raw
	High	VPIIVTGNDFSTLYAPLIR	Unambiguous	3	3	Bra000144 ;Bra005019 ;Bra017055		HCD	1	0	1	1	128	3.74839	0	0	6.31167	50	3	697.06	2089.17	-1.93138	83.6947	46978	46978	MS2	27/72	20130120_Brassica_A3.raw
	High	VPIIVTGNDFSTLYAPLIR	Unambiguous	3	3	Bra000144 ;Bra005019 ;Bra017055		HCD	1	0	1	1	110	3.72383	0	0	3.61139	50	3	697.061	2089.17	-0.178478	49.6121	27709	27709	MS2	30/72	20130120_Brassica_A4.raw
	High	GLAYDmSDDQQDITR	Unambiguous	1	1	Bra017055	M6(Oxidation)	HCD	1	0	1	1	91	3.70894	0	0	11.9014	35	2	872.375	1743.74	-3.0947	28.7689	15941	15941	MS2	16/28	20130120_Brassica_A1.raw
	High	VPLILGVWGGK	Unambiguous	1	1	Bra017055		HCD	1	0	1	1	56	3.70469	0	0	36.7662	50	1	1138.7	1138.7	0.00260632	44.4016	24827	24827	MS2	19/20	20130120_Brassica_A1.raw
	High	GLAYDmSDDQQDITR	Unambiguous	1	1	Bra017055	M6(Oxidation)	HCD	1	0	1	1	93	3.69186	0	0	25.5571	33	2	872.376	1743.75	-2.11463	28.5123	15794	15794	MS2	15/28	20130120_Brassica_A1.raw
	High	LmEYGNmLVmEQENVK	Unambiguous	3	3	Bra000144 ;Bra005019 ;Bra017055	M2(Oxidation); M7(Oxidation); M10(Oxidation)	HCD	1	0	1	1	216	3.68066	0	0	9.43354	50	2	988.444	1975.88	0.228265	32.0786	17795	17795	MS2	19/30	20130120_Brassica_A2.raw
	High	GLAYDmSDDQQDITR	Unambiguous	1	1	Bra017055	M6(Oxidation)	HCD	1	0	1	1	131	3.65904	0	0	26.9662	28	2	872.38	1743.75	1.66562	28.6246	15841	15841	MS2	15/28	20130120_Brassica_A5.raw
	High	GLAYDmSDDQQDITR	Unambiguous	1	1	Bra017055	M6(Oxidation)	HCD	1	0	1	1	100	3.63924	0	0	36.5717	50	2	872.378	1743.75	0.26553	28.7973	15921	15921	MS2	15/28	20130120_Brassica_A6.raw
	High	LmEYGNmLVmEQENVKR	Unambiguous	3	3	Bra000144 ;Bra005019 ;Bra017055	M2(Oxidation); M7(Oxidation); M10(Oxidation)	HCD	1	0	1	1	283	3.63798	0	1	47.1051	39	3	711.331	2131.98	-1.84885	30.3794	16866	16866	MS2	23/64	20130120_Brassica_A1.raw
	High	GLAYDmSDDQQDITR	Unambiguous	1	1	Bra017055	M6(Oxidation)	HCD	1	0	1	1	102	3.60739	0	0	24.2038	36	2	872.378	1743.75	0.26553	28.6741	15851	15851	MS2	15/28	20130120_Brassica_A2.raw
	High	VQLADQYLNEAALGDANADAIGR	Unambiguous	2	2	Bra000144 ;Bra017055		HCD	1	0	1	1	387	3.60515	0	0	63.1338	50	3	796.733	2388.19	2.65794	92.3176	51812	51812	MS2	25/88	20130120_Brassica_A3.raw
	High	mGINPImmSAGELESGNAGEPAK	Unambiguous	3	3	Bra000144 ;Bra005019 ;Bra017055	M1(Oxidation); M7(Oxidation); M8(Oxidation)	HCD	1	0	1	1	177	3.59455	0	0	0	50	2	1176.53	2352.05	0.639422	34.5244	19189	19189	MS2	20/44	20130120_Brassica_A2.raw
	High	VPIIVTGNDFSTLYAPLIR	Unambiguous	3	3	Bra000144 ;Bra005019 ;Bra017055		HCD	1	0	1	1	104	3.53745	0	0	7.69314	23	3	697.061	2089.17	0.259748	49.8804	27857	27857	MS2	26/72	20130120_Brassica_A4.raw
	High	VQLADQYLNEAALGDANADAIGR	Unambiguous	2	2	Bra000144 ;Bra017055		HCD	1	0	1	1	387	3.52842	0	0	0	50	3	796.732	2388.18	0.664487	41.9392	23224	23224	MS2	25/88	20130120_Brassica_A7.raw
	High	GKGmVDSVFQAPmGTGTHNAVLSSYEYISQGLK	Unambiguous	3	3	Bra000144 ;Bra005019 ;Bra017055	M4(Oxidation); M13(Oxidation)	HCD	1	0	1	1	372	3.50536	0	1	0	50	3	1168.9	3504.68	1.23452	43.7621	24469	24469	MS2	25/128	20130120_Brassica_A1.raw
	High	KFVEGLGVEK	Unambiguous	3	3	Bra000144 ;Bra005019 ;Bra017055		HCD	1	0	1	1	226	3.49253	0	1	0	27	1	1105.62	1105.62	-1.88341	26.3284	14545	14545	MS2	18/18	20130120_Brassica_A3.raw
	High	mccLFINDLDAGAGR	Unambiguous	2	2	Bra000144 ;Bra017055	M1(Oxidation); C2(Carbamidomethyl); C3(Carbamidomethyl)	HCD	1	0	1	1	107	3.48592	0	0	17.5718	50	2	864.879	1728.75	-0.23067	39.3597	21962	21962	MS2	18/28	20130120_Brassica_A5.raw
	High	VPIIVTGNDFSTLYAPLIR	Unambiguous	3	3	Bra000144 ;Bra005019 ;Bra017055		HCD	1	0	1	1	125	3.47845	0	0	0	32	3	697.061	2089.17	-0.529059	49.909	27845	27845	MS2	26/72	20130120_Brassica_A2.raw
	High	LmEYGNmLVmEQENVK	Unambiguous	3	3	Bra000144 ;Bra005019 ;Bra017055	M2(Oxidation); M7(Oxidation); M10(Oxidation)	HCD	1	0	1	1	214	3.44586	0	0	0	50	2	988.444	1975.88	-0.265976	32.1454	17834	17834	MS2	16/30	20130120_Brassica_A6.raw
	High	LmEYGNmLVmEQENVK	Unambiguous	3	3	Bra000144 ;Bra005019 ;Bra017055	M2(Oxidation); M7(Oxidation); M10(Oxidation)	HCD	1	0	1	1	231	3.43843	0	0	44.2032	28	3	659.299	1975.88	1.17905	31.988	17793	17793	MS2	21/60	20130120_Brassica_A1.raw
	High	VPIIVTGNDFSTLYAPLIR	Unambiguous	3	3	Bra000144 ;Bra005019 ;Bra017055		HCD	1	0	1	1	89	3.43381	0	0		50	3	697.064	2089.18	3.41809	50.8421	28522	28522	MS2	25/72	20130120_Brassica_A3.raw
	High	mGINPImmSAGELESGNAGEPAK	Unambiguous	3	3	Bra000144 ;Bra005019 ;Bra017055	M1(Oxidation); M7(Oxidation); M8(Oxidation)	HCD	1	0	1	1	187	3.43153	0	0	54.6611	50	3	784.687	2352.05	-2.24672	34.8446	19428	19428	MS2	22/88	20130120_Brassica_A1.raw
	High	VPIIVTGNDFSTLYAPLIR	Unambiguous	3	3	Bra000144 ;Bra005019 ;Bra017055		HCD	1	0	1	1	53	3.41892	0	0	0	50	2	1045.09	2089.17	1.61007	84.7681	47581	47581	MS2	16/36	20130120_Brassica_A3.raw
	High	IKDEDIVTLVDQFPGQSIDFFGALR	Unambiguous	1	1	Bra017055		HCD	1	0	1	1	278	3.35622	0	1	0.849083	50	3	941.824	2823.46	0.768921	54.399	30385	30385	MS2	22/96	20130120_Brassica_A4.raw
	High	IKDEDIVTLVDQFPGQSIDFFGALR	Unambiguous	1	1	Bra017055		HCD	1	0	1	1	268	3.34282	0	1	2.33049	50	3	941.826	2823.46	2.2605	54.2388	30336	30336	MS2	19/96	20130120_Brassica_A1.raw
	High	mGINPImmSAGELESGNAGEPAK	Unambiguous	3	3	Bra000144 ;Bra005019 ;Bra017055	M1(Oxidation); M7(Oxidation); M8(Oxidation)	HCD	1	0	1	1	236	3.33755	0	0	29.2005	50	3	784.69	2352.06	2.11284	34.9615	19446	19446	MS2	23/88	20130120_Brassica_A6.raw
	High	VPIIVTGNDFSTLYAPLIR	Unambiguous	3	3	Bra000144 ;Bra005019 ;Bra017055		HCD	1	0	1	1	125	3.31107	0	0	5.79854	50	3	697.061	2089.17	-0.704349	49.6293	27756	27756	MS2	26/72	20130120_Brassica_A1.raw
	High	IKDEDIVTLVDQFPGQSIDFFGALR	Unambiguous	1	1	Bra017055		HCD	1	0	1	1	280	3.29884	0	1	0	50	3	941.826	2823.46	2.90901	54.132	30237	30237	MS2	22/96	20130120_Brassica_A4.raw
	High	SFQcELVmAK	Unambiguous	3	3	Bra000144 ;Bra005019 ;Bra017055	C4(Carbamidomethyl); M8(Oxidation)	HCD	1	0	1	1	174	3.28275	0	0	0	50	1	1228.57	1228.57	-1.03587	30.0633	16733	16733	MS2	15/18	20130120_Brassica_A3.raw
	High	VQLADQYLNEAALGDANADAIGR	Unambiguous	2	2	Bra000144 ;Bra017055		HCD	1	0	1	1	384	3.28006	0	0	9.27301	50	3	796.734	2388.19	3.11797	42.0634	23482	23482	MS2	23/88	20130120_Brassica_A4.raw
	High	VPIIVTGNDFSTLYAPLIR	Unambiguous	3	3	Bra000144 ;Bra005019 ;Bra017055		HCD	1	0	1	1	125	3.27491	0	0	0	18	3	697.06	2089.17	-1.31787	49.7915	27936	27936	MS2	28/72	20130120_Brassica_A3.raw
	High	VPIIVTGNDFSTLYAPLIR	Unambiguous	3	3	Bra000144 ;Bra005019 ;Bra017055		HCD	1	0	1	1	45	3.25638	0	0	0	50	2	1045.09	2089.17	0.324614	85.7061	48106	48106	MS2	14/36	20130120_Brassica_A3.raw
	High	VPIIVTGNDFSTLYAPLIR	Unambiguous	3	3	Bra000144 ;Bra005019 ;Bra017055		HCD	1	0	1	1	60	3.25192	0	0	0	50	2	1045.09	2089.17	0.324614	85.0264	47725	47725	MS2	15/36	20130120_Brassica_A3.raw
	High	VPIIVTGNDFSTLYAPLIR	Unambiguous	3	3	Bra000144 ;Bra005019 ;Bra017055		HCD	1	0	1	1	55	3.24342	0	0	0	50	2	1045.09	2089.17	1.84379	90.2849	50678	50678	MS2	15/36	20130120_Brassica_A3.raw
	High	FVEGLGVEK	Unambiguous	3	3	Bra000144 ;Bra005019 ;Bra017055		HCD	1	0	1	1	347	3.24212	0	0	0	33	1	977.532	977.532	1.86511	29.3087	16224	16224	MS2	16/16	20130120_Brassica_A4.raw
	High	IKDEDIVTLVDQFPGQSIDFFGALR	Unambiguous	1	1	Bra017055		HCD	1	0	1	1	280	3.22186	0	1	0	50	3	941.825	2823.46	0.963475	54.1358	30246	30246	MS2	20/96	20130120_Brassica_A6.raw
	High	VQLADQYLNEAALGDANADAIGR	Unambiguous	2	2	Bra000144 ;Bra017055		HCD	1	0	1	1	372	3.20277	0	0	6.9167	50	3	796.732	2388.18	0.741158	92.5774	51956	51956	MS2	21/88	20130120_Brassica_A3.raw
	High	LmEYGNmLVmEQENVKR	Unambiguous	3	3	Bra000144 ;Bra005019 ;Bra017055	M2(Oxidation); M7(Oxidation); M10(Oxidation)	HCD	1	0	1	1	288	3.20003	0	1	73.8977	30	3	711.331	2131.98	-1.59119	30.161	16790	16790	MS2	21/64	20130120_Brassica_A3.raw
	High	LmEYGNmLVmEQENVK	Unambiguous	3	3	Bra000144 ;Bra005019 ;Bra017055	M2(Oxidation); M7(Oxidation); M10(Oxidation)	HCD	1	0	1	1	227	3.19618	0	0	70.0275	12	3	659.299	1975.88	0.0670097	31.5083	17572	17572	MS2	23/60	20130120_Brassica_A3.raw
	High	FVEGLGVEK	Unambiguous	3	3	Bra000144 ;Bra005019 ;Bra017055		HCD	1	0	1	1	269	3.18749	0	0	27.3473	29	1	977.531	977.531	0.429034	28.7345	15958	15958	MS2	16/16	20130120_Brassica_A3.raw
	High	VPLILGVWGGK	Unambiguous	1	1	Bra017055		HCD	1	0	1	1	43	3.18595	0	0	7.158	50	1	1138.7	1138.7	0.109808	44.3195	24762	24762	MS2	15/20	20130120_Brassica_A5.raw
	High	KFVEGLGVEK	Unambiguous	3	3	Bra000144 ;Bra005019 ;Bra017055		HCD	0.1478	0	1	1	219	3.17648	0	1	5.73068	2	2	553.316	1105.62	-1.28833	26.3144	14537	14537	MS2	18/18	20130120_Brassica_A3.raw
	High	GmVDSVFQAPmGTGTHNAVLSSYEYISQGLK	Unambiguous	3	3	Bra000144 ;Bra005019 ;Bra017055	M2(Oxidation); M11(Oxidation)	HCD	1	0	1	1	427	3.13984	0	0	2.18637	17	3	1107.2	3319.58	5.41737	45.7972	25611	25611	MS2	21/120	20130120_Brassica_A1.raw
	High	mGINPImmSAGELESGNAGEPAK	Unambiguous	3	3	Bra000144 ;Bra005019 ;Bra017055	M1(Oxidation); M7(Oxidation); M8(Oxidation)	HCD	1	0	1	1	194	3.11504	0	0	0	50	2	1176.53	2352.06	3.54578	34.5789	19229	19229	MS2	15/44	20130120_Brassica_A6.raw
	High	LmEYGNmLVmEQENVKR	Unambiguous	3	3	Bra000144 ;Bra005019 ;Bra017055	M2(Oxidation); M7(Oxidation); M10(Oxidation)	HCD	1	0	1	1	245	3.0962	0	1	0	50	2	1066.49	2131.98	-2.38648	30.2896	16795	16795	MS2	15/32	20130120_Brassica_A5.raw
	High	VPIIVTGNDFSTLYAPLIR	Unambiguous	3	3	Bra000144 ;Bra005019 ;Bra017055		HCD	1	0	1	1	102	3.09533	0	0	20.8438	50	3	697.062	2089.17	1.66207	84.7427	47568	47568	MS2	23/72	20130120_Brassica_A3.raw
	High	SFQcELVmAK	Unambiguous	3	3	Bra000144 ;Bra005019 ;Bra017055	C4(Carbamidomethyl); M8(Oxidation)	HCD	1	0	1	1	190	3.07207	0	0	0	39	1	1228.57	1228.57	-2.02947	30.574	16951	16951	MS2	13/18	20130120_Brassica_A4.raw
	High	VPIIVTGNDFSTLYAPLIR	Unambiguous	3	3	Bra000144 ;Bra005019 ;Bra017055		HCD	1	0	1	1	105	3.0621	0	0	4.66931	50	3	697.061	2089.17	0.172103	49.5767	27689	27689	MS2	23/72	20130120_Brassica_A6.raw
	High	VPIIVTGNDFSTLYAPLIR	Unambiguous	3	3	Bra000144 ;Bra005019 ;Bra017055		HCD	1	0	1	1	108	3.00303	0	0	28.0088	50	3	697.062	2089.17	1.31149	69.0583	38633	38633	MS2	23/72	20130120_Brassica_A5.raw
	High	VQLADQYLNEAALGDANADAIGR	Unambiguous	2	2	Bra000144 ;Bra017055		HCD	1	0	1	1	221	3.00111	0	0	0	50	2	1194.59	2388.18	0.46566	92.7719	52064	52064	MS2	13/44	20130120_Brassica_A3.raw
	High	FVEGLGVEK	Unambiguous	3	3	Bra000144 ;Bra005019 ;Bra017055		HCD	1	0	1	1	266	3.00023	0	0	0	50	1	977.531	977.531	1.17829	29.1985	16189	16189	MS2	14/16	20130120_Brassica_A1.raw
	High	GLAYDmSDDQQDITR	Unambiguous	1	1	Bra017055	M6(Oxidation)	HCD	1	0	1	1	98	2.96551	0	0	58.0629	50	2	872.378	1743.75	0.125521	28.9864	16050	16050	MS2	15/28	20130120_Brassica_A5.raw
	High	KFVEGLGVEK	Unambiguous	3	3	Bra000144 ;Bra005019 ;Bra017055		HCD	1	0	1	1	227	2.94899	0	1	9.24465	8	2	553.316	1105.63	0.036576	26.8655	14841	14841	MS2	17/18	20130120_Brassica_A1.raw
	High	SFQcELVmAK	Unambiguous	3	3	Bra000144 ;Bra005019 ;Bra017055	C4(Carbamidomethyl); M8(Oxidation)	HCD	1	0	1	1	192	2.91101	0	0	0	50	1	1228.57	1228.57	0.553889	30.879	17110	17110	MS2	13/18	20130120_Brassica_A2.raw
	High	MGINPIMMSAGELESGNAGEPAK	Unambiguous	3	3	Bra000144 ;Bra005019 ;Bra017055		HCD	1	0	1	1	235	2.89236	0	0	0	50	2	1152.53	2304.05	-9.25303	32.521	18156	18156	MS2	14/44	20130120_Brassica_A3.raw
	High	mccLFINDLDAGAGR	Unambiguous	2	2	Bra000144 ;Bra017055	M1(Oxidation); C2(Carbamidomethyl); C3(Carbamidomethyl)	HCD	1	0	1	1	109	2.88753	0	0	47.1252	50	2	864.877	1728.75	-2.41964	39.8408	22195	22195	MS2	16/28	20130120_Brassica_A2.raw
	High	VPIIVTGNDFSTLYAPLIR	Unambiguous	3	3	Bra000144 ;Bra005019 ;Bra017055		HCD	1	0	1	1	119	2.88618	0	0	13.2929	50	3	697.06	2089.17	-1.14258	50.4058	28279	28279	MS2	21/72	20130120_Brassica_A3.raw
	High	KFVEGLGVEK	Unambiguous	3	3	Bra000144 ;Bra005019 ;Bra017055		HCD	1	0	1	1	285	2.8804	0	1	5.26103	5	2	553.316	1105.63	0.257393	26.9005	14850	14850	MS2	17/18	20130120_Brassica_A5.raw
	High	VPIIVTGNDFSTLYAPLIR	Unambiguous	3	3	Bra000144 ;Bra005019 ;Bra017055		HCD	1	0	1	1	55	2.85454	0	0	0	50	2	1045.09	2089.17	0.207754	91.0583	51109	51109	MS2	14/36	20130120_Brassica_A3.raw
	High	FYWAPTREDR	Unambiguous	3	3	Bra000144 ;Bra005019 ;Bra017055		HCD	1	0	1	1	244	2.83766	0	1	24.9232	14	2	670.823	1340.64	-0.386673	30.0182	16707	16707	MS2	12/18	20130120_Brassica_A3.raw
	High	mGINPImmSAGELESGNAGEPAK	Unambiguous	3	3	Bra000144 ;Bra005019 ;Bra017055	M1(Oxidation); M7(Oxidation); M8(Oxidation)	HCD	1	0	1	1	236	2.83395	0	0	89.7474	41	3	784.69	2352.06	2.11284	34.6543	19386	19386	MS2	21/88	20130120_Brassica_A3.raw
	High	MGINPIMMSAGELESGNAGEPAK	Unambiguous	3	3	Bra000144 ;Bra005019 ;Bra017055		HCD	1	0	1	1	251	2.83386	0	0	11.0783	50	2	1152.53	2304.06	-4.48473	33.92	18967	18967	MS2	13/44	20130120_Brassica_A3.raw
	High	VPIIVTGNDFSTLYAPLIR	Unambiguous	3	3	Bra000144 ;Bra005019 ;Bra017055		HCD	1	0	1	1	34	2.8319	0	0	0	50	2	1045.09	2089.17	0.792054	50.395	28118	28118	MS2	13/36	20130120_Brassica_A2.raw
	High	VPIIVTGNDFSTLYAPLIR	Unambiguous	3	3	Bra000144 ;Bra005019 ;Bra017055		HCD	1	0	1	1	108	2.81651	0	0	18.4811	50	3	697.061	2089.17	-0.00318757	84.4791	47419	47419	MS2	29/72	20130120_Brassica_A3.raw
	High	KFVEGLGVEK	Unambiguous	3	3	Bra000144 ;Bra005019 ;Bra017055		HCD	1	0	1	1	215	2.81558	0	1	6.21954	2	2	553.316	1105.63	0.036576	27.0199	14906	14906	MS2	16/18	20130120_Brassica_A4.raw
	High	VPLILGVWGGK	Unambiguous	1	1	Bra017055		HCD	1	0	1	1	37	2.80882	0	0	0	50	1	1138.7	1138.7	-1.71262	43.7028	24526	24526	MS2	13/20	20130120_Brassica_A3.raw
	High	mGINPImmSAGELESGNAGEPAK	Unambiguous	3	3	Bra000144 ;Bra005019 ;Bra017055	M1(Oxidation); M7(Oxidation); M8(Oxidation)	HCD	1	0	1	1	127	2.80847	0	0		50	2	1176.53	2352.05	1.08912	35.0454	19541	19541	MS2	16/44	20130120_Brassica_A1.raw
	High	FVEGLGVEK	Unambiguous	3	3	Bra000144 ;Bra005019 ;Bra017055		HCD	1	0	1	1	265	2.80586	0	0	0	4	1	977.53	977.53	0.0544051	28.9911	16108	16108	MS2	16/16	20130120_Brassica_A3.raw
	High	KFVEGLGVEK	Unambiguous	3	3	Bra000144 ;Bra005019 ;Bra017055		HCD	1	0	1	1	231	2.79548	0	1	21.8236	36	2	553.316	1105.62	-1.17792	26.9693	14868	14868	MS2	17/18	20130120_Brassica_A2.raw
	High	SFQcELVmAK	Unambiguous	3	3	Bra000144 ;Bra005019 ;Bra017055	C4(Carbamidomethyl); M8(Oxidation)	HCD	1	0	1	1	191	2.74939	0	0	0	32	1	1228.57	1228.57	0.25581	30.7289	17047	17047	MS2	13/18	20130120_Brassica_A5.raw
	High	YREAADLIKK	Unambiguous	1	1	Bra017055		HCD	1	0	1	1	228	2.72902	0	2	29.2416	50	3	402.899	1206.68	-0.610782	23.1853	12733	12733	MS2	20/36	20130120_Brassica_A3.raw
	High	NFLTLPNIK	Unambiguous	3	3	Bra000144 ;Bra005019 ;Bra017055		HCD	1	0	1	1	204	2.72807	0	0	0	14	1	1059.62	1059.62	0.114906	41.237	23014	23014	MS2	14/16	20130120_Brassica_A4.raw
	High	MGINPIMMSAGELESGNAGEPAK	Unambiguous	3	3	Bra000144 ;Bra005019 ;Bra017055		HCD	1	0	1	1	242	2.72213	0	0	0	50	2	1152.53	2304.05	-7.45167	34.3085	19189	19189	MS2	13/44	20130120_Brassica_A3.raw
	High	VPIIVTGNDFSTLYAPLIR	Unambiguous	3	3	Bra000144 ;Bra005019 ;Bra017055		HCD	1	0	1	1	117	2.72001	0	0	30.6412	50	3	697.06	2089.17	-1.84374	50.2062	28013	28013	MS2	19/72	20130120_Brassica_A2.raw
	High	VPIIVTGNDFSTLYAPLIR	Unambiguous	3	3	Bra000144 ;Bra005019 ;Bra017055		HCD	1	0	1	1	51	2.71981	0	0	3.22842	50	2	1045.09	2089.17	-0.259687	90.8003	50965	50965	MS2	13/36	20130120_Brassica_A3.raw
	High	VPIIVTGNDFSTLYAPLIR	Unambiguous	3	3	Bra000144 ;Bra005019 ;Bra017055		HCD	1	0	1	1	141	2.67391	0	0	0	50	3	697.06	2089.16	-2.45726	50.1345	28128	28128	MS2	21/72	20130120_Brassica_A3.raw
	High	VQLADQYLNEAALGDANADAIGR	Unambiguous	2	2	Bra000144 ;Bra017055		HCD	1	0	1	1	315	2.6629	0	0	12.3144	50	3	796.728	2388.17	-3.93582	93.122	52258	52258	MS2	16/88	20130120_Brassica_A3.raw
	High	VPIIVTGNDFSTLYAPLIR	Unambiguous	3	3	Bra000144 ;Bra005019 ;Bra017055		HCD	1	0	1	1	51	2.66153	0	0	0	50	2	1045.09	2089.17	1.37635	52.002	29170	29170	MS2	11/36	20130120_Brassica_A3.raw
	High	mGINPImmSAGELESGNAGEPAK	Unambiguous	3	3	Bra000144 ;Bra005019 ;Bra017055	M1(Oxidation); M7(Oxidation); M8(Oxidation)	HCD	1	0	1	1	130	2.65268	0	0	0	50	2	1176.53	2352.05	-1.95556	92.1292	51708	51708	MS2	12/44	20130120_Brassica_A3.raw
	High	VQLADQYLNEAALGDANADAIGR	Unambiguous	2	2	Bra000144 ;Bra017055		HCD	1	0	1	1	226	2.65075	0	0	2.781	50	2	1194.6	2388.19	3.63474	41.9498	23229	23229	MS2	12/44	20130120_Brassica_A7.raw
	High	VPIIVTGNDFSTLYAPLIR	Unambiguous	3	3	Bra000144 ;Bra005019 ;Bra017055		HCD	1	0	1	1	127	2.61786	0	0	46.146	50	3	697.061	2089.17	-0.616704	82.605	46363	46363	MS2	24/72	20130120_Brassica_A3.raw
	High	FVEGLGVEK	Unambiguous	3	3	Bra000144 ;Bra005019 ;Bra017055		HCD	1	0	1	1	265	2.6121	0	0	0	50	1	977.531	977.531	1.05341	29.333	16248	16248	MS2	14/16	20130120_Brassica_A5.raw
	High	VPIIVTGNDFSTLYAPLIR	Unambiguous	3	3	Bra000144 ;Bra005019 ;Bra017055		HCD	1	0	1	1	60	2.57651	0	0	0	50	2	1045.09	2089.17	2.07751	85.9806	48260	48260	MS2	12/36	20130120_Brassica_A3.raw
	High	VPLILGVWGGK	Unambiguous	1	1	Bra017055		HCD	1	0	1	1	53	2.56582	0	0	2.12129	21	2	569.852	1138.7	-0.813215	44.3592	24804	24804	MS2	14/20	20130120_Brassica_A1.raw
	High	VPLILGVWGGK	Unambiguous	1	1	Bra017055		HCD	1	0	1	1	53	2.56277	0	0	31.55	31	2	569.852	1138.7	-0.813215	44.3559	24770	24770	MS2	12/20	20130120_Brassica_A4.raw
Bra028406	Ribulose bisphosphate carboxylase (small chain) family protein	890.23	64.64	1	5	15	242	181	20.2131	8.04541
	Confidence Level	Sequence	PSM Ambiguity	# Proteins	# Protein Groups	Protein Group Accessions	Modifications	Activation Type	ΔScore	ΔCn	Rank	Search Engine Rank	Peptides Matched	XCorr	Probability	# Missed Cleavages	Isolation Interference [%]	Ion Inject Time [ms]	Charge	m/z [Da]	MH+ [Da]	ΔM [ppm]	RT [min]	First Scan	Last Scan	MS Order	Ions Matched	Spectrum File
	High	KKFETLSYLPDVTDVELAK	Unambiguous	1	1	Bra028406		HCD	0.5963	0	1	1	199	6.95791	0	2	0	50	2	1098.59	2196.18	0.471046	40.5336	22601	22601	MS2	30/36	20130120_Brassica_A6.raw
	High	LPLFGcTDSAQVLK	Unambiguous	5	2	Bra028181 ;Bra028406	C6(Carbamidomethyl)	HCD	0.58	0	1	1	383	6.31053	0	0	0	50	1	1548.81	1548.81	-0.0214738	39.7338	22145	22145	MS2	23/26	20130120_Brassica_A6.raw
	High	KKFETLSYLPDVTDVELAK	Unambiguous	1	1	Bra028406		HCD	1	0	1	1	196	6.21802	0	2	33.1346	50	2	1098.59	2196.18	-0.423291	40.2681	22452	22452	MS2	29/36	20130120_Brassica_A6.raw
	High	KFETLSYLPDVTDVELAK	Unambiguous	1	1	Bra028406		HCD	1	0	1	1	278	5.89027	0	1	0	6	2	1034.55	2068.09	0.617933	43.3756	24203	24203	MS2	27/34	20130120_Brassica_A6.raw
	High	KFETLSYLPDVTDVELAK	Unambiguous	1	1	Bra028406		HCD	1	0	1	1	257	5.73562	0	1	11.4565	50	2	1034.55	2068.09	3.80531	43.1544	24126	24126	MS2	24/34	20130120_Brassica_A1.raw
	High	LPLFGcTDSAQVLK	Unambiguous	5	2	Bra028181 ;Bra028406	C6(Carbamidomethyl)	HCD	1	0	1	1	341	5.50002	0	0	0	50	1	1548.81	1548.81	-1.12489	39.9852	22276	22276	MS2	24/26	20130120_Brassica_A2.raw
	High	LPLFGcTDSAQVLK	Unambiguous	5	2	Bra028181 ;Bra028406	C6(Carbamidomethyl)	HCD	1	0	1	1	369	5.1209	0	0	16.3266	50	1	1548.81	1548.81	-0.573183	40.097	22369	22369	MS2	22/26	20130120_Brassica_A4.raw
	High	LPLFGcTDSAQVLK	Unambiguous	5	2	Bra028181 ;Bra028406	C6(Carbamidomethyl)	HCD	1	0	1	1	389	5.06921	0	0	12.9959	3	1	1548.81	1548.81	-2.1495	39.9975	22297	22297	MS2	22/26	20130120_Brassica_A6.raw
	High	KFETLSYLPDVTDVELAK	Unambiguous	1	1	Bra028406		HCD	1	0	1	1	294	4.82659	0	1	9.79955	50	2	1034.55	2068.09	0.972087	43.028	24033	24033	MS2	21/34	20130120_Brassica_A5.raw
	High	LPLFGcTDSAQVLK	Unambiguous	5	2	Bra028181 ;Bra028406	C6(Carbamidomethyl)	HCD	1	0	1	1	397	4.77499	0	0	26.9255	27	2	774.906	1548.8	-2.67049	39.6737	22111	22111	MS2	22/26	20130120_Brassica_A6.raw
	High	LPLFGcTDSAQVLK	Unambiguous	5	2	Bra028181 ;Bra028406	C6(Carbamidomethyl)	HCD	1	0	1	1	392	4.74116	0	0	0	20	2	774.908	1548.81	-0.227195	83.8523	46964	46964	MS2	24/26	20130120_Brassica_A6.raw
	High	WIPcVEFELEHGFVYR	Unambiguous	4	3	Bra025431 ;Bra028181 ;Bra028406	C4(Carbamidomethyl)	HCD	1	0	1	1	378	4.7285	0	0	5.90998	50	3	694.336	2080.99	-1.20062	91.3295	51145	51145	MS2	28/60	20130120_Brassica_A6.raw
	High	LPLFGcTDSAQVLK	Unambiguous	5	2	Bra028181 ;Bra028406	C6(Carbamidomethyl)	HCD	1	0	1	1	386	4.62784	0	0	2.19032	50	2	774.909	1548.81	0.639777	85.3996	47829	47829	MS2	22/26	20130120_Brassica_A6.raw
	High	LPLFGcTDSAQVLK	Unambiguous	5	2	Bra028181 ;Bra028406	C6(Carbamidomethyl)	HCD	1	0	1	1	382	4.61433	0	0	4.61902	22	2	774.909	1548.81	1.66438	91.6304	51312	51312	MS2	22/26	20130120_Brassica_A6.raw
	High	LPLFGcTDSAQVLK	Unambiguous	5	2	Bra028181 ;Bra028406	C6(Carbamidomethyl)	HCD	1	0	1	1	392	4.60848	0	0	0.974678	19	2	774.908	1548.81	-0.30601	84.3625	47252	47252	MS2	23/26	20130120_Brassica_A6.raw
	High	LPLFGcTDSAQVLK	Unambiguous	5	2	Bra028181 ;Bra028406	C6(Carbamidomethyl)	HCD	1	0	1	1	401	4.58772	0	0	2.02902	18	2	774.908	1548.81	0.00925227	87.2655	48872	48872	MS2	22/26	20130120_Brassica_A6.raw
	High	WIPcVEFELEHGFVYR	Unambiguous	4	3	Bra025431 ;Bra028181 ;Bra028406	C4(Carbamidomethyl)	HCD	1	0	1	1	353	4.58544	0	0	16.5555	40	3	694.337	2081	0.823141	47.5175	26536	26536	MS2	27/60	20130120_Brassica_A6.raw
	High	KFETLSYLPDVTDVELAK	Unambiguous	1	1	Bra028406		HCD	1	0	1	1	258	4.56557	0	1	0	12	2	1034.55	2068.09	1.09014	43.1087	24053	24053	MS2	21/34	20130120_Brassica_A6.raw
	High	LPLFGcTDSAQVLK	Unambiguous	5	2	Bra028181 ;Bra028406	C6(Carbamidomethyl)	HCD	1	0	1	1	387	4.56186	0	0	9.13901	50	2	774.909	1548.81	1.66438	91.7323	51370	51370	MS2	22/26	20130120_Brassica_A6.raw
	High	LPLFGcTDSAQVLK	Unambiguous	5	2	Bra028181 ;Bra028406	C6(Carbamidomethyl)	HCD	1	0	1	1	377	4.54277	0	0	6.41771	21	2	774.909	1548.81	0.955039	42.008	23430	23430	MS2	22/26	20130120_Brassica_A6.raw
	High	LPLFGcTDSAQVLK	Unambiguous	5	2	Bra028181 ;Bra028406	C6(Carbamidomethyl)	HCD	1	0	1	1	381	4.52204	0	0	1.54498	3	2	774.909	1548.81	0.718592	91.371	51167	51167	MS2	22/26	20130120_Brassica_A6.raw
	High	LPLFGcTDSAQVLK	Unambiguous	5	2	Bra028181 ;Bra028406	C6(Carbamidomethyl)	HCD	1	0	1	1	384	4.51538	0	0	5.292	1	2	774.908	1548.81	0.324515	40.4538	22556	22556	MS2	23/26	20130120_Brassica_A6.raw
	High	QVQcISFIAYKPPSFTGA	Unambiguous	3	2	Bra028181 ;Bra028406	C4(Carbamidomethyl)	HCD	1	0	1	1	332	4.51239	0	0	0.444852	2	2	1007.51	2014.01	-0.622886	44.1278	24629	24629	MS2	16/34	20130120_Brassica_A6.raw
	High	LPLFGcTDSAQVLK	Unambiguous	5	2	Bra028181 ;Bra028406	C6(Carbamidomethyl)	HCD	1	0	1	1	391	4.47778	0	0	1.7952	13	2	774.908	1548.81	0.0880679	87.0075	48728	48728	MS2	22/26	20130120_Brassica_A6.raw
	High	KFETLSYLPDVTDVELAK	Unambiguous	1	1	Bra028406		HCD	1	0	1	1	295	4.47694	0	1	12.3622	50	2	1034.55	2068.09	3.21506	43.1578	24098	24098	MS2	20/34	20130120_Brassica_A4.raw
	High	WIPcVEFELEHGFVYR	Unambiguous	4	3	Bra025431 ;Bra028181 ;Bra028406	C4(Carbamidomethyl)	HCD	1	0	1	1	361	4.4697	0	0	1.2185	1	3	694.336	2080.99	-0.672678	47.2329	26377	26377	MS2	25/60	20130120_Brassica_A6.raw
	High	EVQEcKTEYPNAFIR	Unambiguous	4	3	Bra025431 ;Bra028181 ;Bra028406	C5(Carbamidomethyl)	HCD	1	0	1	1	346	4.4685	0	1	0	50	2	942.45	1883.89	-1.1758	31.3585	17431	17431	MS2	21/28	20130120_Brassica_A1.raw
	High	QVQcISFIAYKPPSFTGA	Unambiguous	3	2	Bra028181 ;Bra028406	C4(Carbamidomethyl)	HCD	1	0	1	1	332	4.46799	0	0	0.37294	2	2	1007.51	2014.01	-0.562275	44.2079	24675	24675	MS2	17/34	20130120_Brassica_A6.raw
	High	WIPcVEFELEHGFVYR	Unambiguous	4	3	Bra025431 ;Bra028181 ;Bra028406	C4(Carbamidomethyl)	HCD	1	0	1	1	382	4.44481	0	0	21.7242	38	3	694.335	2080.99	-2.52046	46.9672	26233	26233	MS2	26/60	20130120_Brassica_A4.raw
	High	LPLFGcTDSAQVLK	Unambiguous	5	2	Bra028181 ;Bra028406	C6(Carbamidomethyl)	HCD	1	0	1	1	368	4.44359	0	0	12.9959	3	1	1548.81	1548.81	-2.1495	39.9962	22296	22296	MS2	21/26	20130120_Brassica_A6.raw
	High	LPLFGcTDSAQVLK	Unambiguous	5	2	Bra028181 ;Bra028406	C6(Carbamidomethyl)	HCD	1	0	1	1	394	4.43814	0	0	10.6421	20	2	774.91	1548.81	2.92542	41.7506	23285	23285	MS2	22/26	20130120_Brassica_A6.raw
	High	LPLFGcTDSAQVLK	Unambiguous	5	2	Bra028181 ;Bra028406	C6(Carbamidomethyl)	HCD	1	0	1	1	360	4.42192	0	0	16.246	50	2	774.908	1548.81	-0.700089	87.1934	48833	48833	MS2	21/26	20130120_Brassica_A6.raw
	High	LPLFGcTDSAQVLK	Unambiguous	5	2	Bra028181 ;Bra028406	C6(Carbamidomethyl)	HCD	1	0	1	1	367	4.41416	0	0	0	25	2	774.907	1548.81	-1.09417	84.108	47108	47108	MS2	22/26	20130120_Brassica_A6.raw
	High	EVQEcKTEYPNAFIR	Unambiguous	4	3	Bra025431 ;Bra028181 ;Bra028406	C5(Carbamidomethyl)	HCD	1	0	1	1	316	4.40647	0	1	9.88074	4	2	942.451	1883.89	-0.398239	31.5203	17472	17472	MS2	20/28	20130120_Brassica_A6.raw
	High	LPLFGcTDSAQVLK	Unambiguous	5	2	Bra028181 ;Bra028406	C6(Carbamidomethyl)	HCD	1	0	1	1	378	4.40395	0	0	54.8385	27	2	774.909	1548.81	0.560961	87.7801	49160	49160	MS2	23/26	20130120_Brassica_A6.raw
	High	LPLFGcTDSAQVLK	Unambiguous	5	2	Bra028181 ;Bra028406	C6(Carbamidomethyl)	HCD	1	0	1	1	381	4.40151	0	0	4.46402	11	2	774.91	1548.81	2.21608	41.4927	23141	23141	MS2	22/26	20130120_Brassica_A6.raw
	High	LPLFGcTDSAQVLK	Unambiguous	5	2	Bra028181 ;Bra028406	C6(Carbamidomethyl)	HCD	1	0	1	1	391	4.39896	0	0	8.42186	50	2	774.909	1548.81	0.482146	92.0249	51533	51533	MS2	21/26	20130120_Brassica_A6.raw
	High	LPLFGcTDSAQVLK	Unambiguous	5	2	Bra028181 ;Bra028406	C6(Carbamidomethyl)	HCD	1	0	1	1	356	4.38186	0	0	0	50	1	1548.81	1548.81	1.16076	39.725	22168	22168	MS2	22/26	20130120_Brassica_A5.raw
	High	LPLFGcTDSAQVLK	Unambiguous	5	2	Bra028181 ;Bra028406	C6(Carbamidomethyl)	HCD	1	0	1	1	397	4.36876	0	0	2.25335	19	2	774.908	1548.81	-0.0695633	86.7498	48584	48584	MS2	23/26	20130120_Brassica_A6.raw
	High	FETLSYLPDVTDVELAK	Unambiguous	1	1	Bra028406		HCD	1	0	1	1	296	4.35972	0	0	0.959752	38	2	970.499	1939.99	0.532526	46.3387	25846	25846	MS2	18/32	20130120_Brassica_A2.raw
	High	LPLFGcTDSAQVLK	Unambiguous	5	2	Bra028181 ;Bra028406	C6(Carbamidomethyl)	HCD	1	0	1	1	399	4.34583	0	0	9.57675	50	2	774.908	1548.81	-0.227195	91.8884	51455	51455	MS2	21/26	20130120_Brassica_A6.raw
	High	LPLFGcTDSAQVLK	Unambiguous	5	2	Bra028181 ;Bra028406	C6(Carbamidomethyl)	HCD	1	0	1	1	385	4.34531	0	0	0.904242	36	2	774.908	1548.81	-0.463642	85.6731	47982	47982	MS2	22/26	20130120_Brassica_A6.raw
	High	LPLFGcTDSAQVLK	Unambiguous	5	2	Bra028181 ;Bra028406	C6(Carbamidomethyl)	HCD	1	0	1	1	359	4.34137	0	0	0.617725	23	2	774.907	1548.81	-0.936536	84.6206	47396	47396	MS2	21/26	20130120_Brassica_A6.raw
	High	LPLFGcTDSAQVLK	Unambiguous	5	2	Bra028181 ;Bra028406	C6(Carbamidomethyl)	HCD	1	0	1	1	378	4.33884	0	0	0	23	2	774.907	1548.81	-1.56706	83.5957	46820	46820	MS2	21/26	20130120_Brassica_A6.raw
	High	LPLFGcTDSAQVLK	Unambiguous	5	2	Bra028181 ;Bra028406	C6(Carbamidomethyl)	HCD	1	0	1	1	398	4.33305	0	0	4.69177	50	2	774.908	1548.81	-0.227195	85.9454	48134	48134	MS2	21/26	20130120_Brassica_A6.raw
	High	LPLFGcTDSAQVLK	Unambiguous	5	2	Bra028181 ;Bra028406	C6(Carbamidomethyl)	HCD	1	0	1	1	380	4.32107	0	0	6.55301	50	2	774.908	1548.81	0.166883	92.2976	51684	51684	MS2	22/26	20130120_Brassica_A6.raw
	High	LPLFGcTDSAQVLK	Unambiguous	5	2	Bra028181 ;Bra028406	C6(Carbamidomethyl)	HCD	1	0	1	1	396	4.31979	0	0	6.1433	41	2	774.908	1548.81	-0.227195	86.2044	48279	48279	MS2	23/26	20130120_Brassica_A6.raw
	High	QVQcISFIAYKPPSFTGA	Unambiguous	3	2	Bra028181 ;Bra028406	C4(Carbamidomethyl)	HCD	1	0	1	1	324	4.2981	0	0	1.05161	6	2	1007.51	2014.01	-0.562275	44.2884	24721	24721	MS2	15/34	20130120_Brassica_A6.raw
	High	QVQcISFIAYKPPSFTGA	Unambiguous	3	2	Bra028181 ;Bra028406	C4(Carbamidomethyl)	HCD	1	0	1	1	355	4.29524	0	0	0	2	2	1007.51	2014.01	-0.98655	43.9828	24545	24545	MS2	18/34	20130120_Brassica_A6.raw
	High	QVQcISFIAYKPPSFTGA	Unambiguous	3	2	Bra028181 ;Bra028406	C4(Carbamidomethyl)	HCD	1	0	1	1	329	4.28984	0	0	0	4	2	1007.51	2014.01	-0.198612	44.0571	24613	24613	MS2	16/34	20130120_Brassica_A5.raw
	High	LPLFGcTDSAQVLK	Unambiguous	5	2	Bra028181 ;Bra028406	C6(Carbamidomethyl)	HCD	1	0	1	1	405	4.25676	0	0	8.09217	50	2	774.908	1548.81	0.00925227	92.1486	51600	51600	MS2	21/26	20130120_Brassica_A6.raw
	High	LPLFGcTDSAQVLK	Unambiguous	5	2	Bra028181 ;Bra028406	C6(Carbamidomethyl)	HCD	1	0	1	1	394	4.24291	0	0	3.70813	6	2	774.908	1548.81	-0.30601	40.9808	22853	22853	MS2	19/26	20130120_Brassica_A6.raw
	High	LPLFGcTDSAQVLK	Unambiguous	5	2	Bra028181 ;Bra028406	C6(Carbamidomethyl)	HCD	1	0	1	1	375	4.22228	0	0	4.61159	50	2	774.908	1548.81	0.245699	86.8026	48614	48614	MS2	20/26	20130120_Brassica_A6.raw
	High	LPLFGcTDSAQVLK	Unambiguous	5	2	Bra028181 ;Bra028406	C6(Carbamidomethyl)	HCD	1	0	1	1	359	4.22137	0	0	9.13466	10	2	774.909	1548.81	1.34912	41.2352	22997	22997	MS2	21/26	20130120_Brassica_A6.raw
	High	LPLFGcTDSAQVLK	Unambiguous	5	2	Bra028181 ;Bra028406	C6(Carbamidomethyl)	HCD	1	0	1	1	372	4.21052	0	0	3.74546	22	2	774.909	1548.81	0.40333	86.4778	48432	48432	MS2	23/26	20130120_Brassica_A6.raw
	High	LPLFGcTDSAQVLK	Unambiguous	5	2	Bra028181 ;Bra028406	C6(Carbamidomethyl)	HCD	1	0	1	1	370	4.20851	0	0	2.17168	32	2	774.908	1548.81	-0.621273	84.8785	47540	47540	MS2	20/26	20130120_Brassica_A6.raw
	High	QVQcISFIAYKPPSFTGA	Unambiguous	3	2	Bra028181 ;Bra028406	C4(Carbamidomethyl)	HCD	1	0	1	1	351	4.20654	0	0	2.03149	17	2	1007.51	2014.01	2.10459	43.8426	24604	24604	MS2	16/34	20130120_Brassica_A3.raw
	High	LPLFGcTDSAQVLK	Unambiguous	5	2	Bra028181 ;Bra028406	C6(Carbamidomethyl)	HCD	1	0	1	1	402	4.20254	0	0	0.601021	1	2	774.908	1548.81	-0.148379	40.0069	22289	22289	MS2	22/26	20130120_Brassica_A2.raw
	High	LPLFGcTDSAQVLK	Unambiguous	5	2	Bra028181 ;Bra028406	C6(Carbamidomethyl)	HCD	1	0	1	1	380	4.18957	0	0	1.53436	2	2	774.908	1548.81	-0.384826	39.7071	22178	22178	MS2	22/26	20130120_Brassica_A1.raw
	High	QVQcISFIAYKPPSFTGA	Unambiguous	3	2	Bra028181 ;Bra028406	C4(Carbamidomethyl)	HCD	1	0	1	1	351	4.18602	0	0	0	7	2	1007.51	2014.01	0.952988	43.7262	24401	24401	MS2	17/34	20130120_Brassica_A6.raw
	High	LPLFGcTDSAQVLK	Unambiguous	5	2	Bra028181 ;Bra028406	C6(Carbamidomethyl)	HCD	1	0	1	1	383	4.17477	0	0	0	50	2	774.91	1548.81	2.13727	92.4066	51743	51743	MS2	21/26	20130120_Brassica_A6.raw
	High	LPLFGcTDSAQVLK	Unambiguous	5	2	Bra028181 ;Bra028406	C6(Carbamidomethyl)	HCD	1	0	1	1	398	4.17348	0	0	1.17618	50	2	774.908	1548.81	0.00925227	85.138	47684	47684	MS2	21/26	20130120_Brassica_A6.raw
	High	QVQcISFIAYKPPSFTGA	Unambiguous	3	2	Bra028181 ;Bra028406	C4(Carbamidomethyl)	HCD	1	0	1	1	350	4.14969	0	0	0	13	2	1007.51	2014.01	-0.562275	45.0492	25149	25149	MS2	16/34	20130120_Brassica_A6.raw
	High	WIPcVEFELEHGFVYR	Unambiguous	4	3	Bra025431 ;Bra028181 ;Bra028406	C4(Carbamidomethyl)	HCD	1	0	1	1	380	4.13342	0	0	29.7236	30	3	694.337	2081	0.207216	46.9608	26223	26223	MS2	25/60	20130120_Brassica_A6.raw
	High	QVQcISFIAYKPPSFTGA	Unambiguous	3	2	Bra028181 ;Bra028406	C4(Carbamidomethyl)	HCD	1	0	1	1	355	4.13058	0	0	0	15	2	1007.51	2014.01	-0.925939	44.4358	24621	24621	MS2	16/34	20130120_Brassica_A7.raw
	High	LPLFGcTDSAQVLK	Unambiguous	5	2	Bra028181 ;Bra028406	C6(Carbamidomethyl)	HCD	1	0	1	1	381	4.08833	0	0	0.195032	41	2	774.908	1548.81	-0.463642	39.8464	22211	22211	MS2	17/26	20130120_Brassica_A6.raw
	High	LPLFGcTDSAQVLK	Unambiguous	5	2	Bra028181 ;Bra028406	C6(Carbamidomethyl)	HCD	1	0	1	1	385	4.07075	0	0	1.81944	0	2	774.908	1548.81	-0.542457	40.199	22412	22412	MS2	20/26	20130120_Brassica_A6.raw
	High	WIPcVEFELEHGFVYR	Unambiguous	4	3	Bra025431 ;Bra028181 ;Bra028406	C4(Carbamidomethyl)	HCD	1	0	1	1	378	4.0627	0	0	7.49462	40	3	694.336	2080.99	-0.144741	47.3477	26442	26442	MS2	26/60	20130120_Brassica_A6.raw
	High	QVQcISFIAYKPPSFTGA	Unambiguous	3	2	Bra028181 ;Bra028406	C4(Carbamidomethyl)	HCD	1	0	1	1	321	4.0516	0	0	0	17	2	1007.51	2014.01	1.86214	91.4837	51230	51230	MS2	16/34	20130120_Brassica_A6.raw
	High	LPLFGcTDSAQVLK	Unambiguous	5	2	Bra028181 ;Bra028406	C6(Carbamidomethyl)	HCD	1	0	1	1	385	4.04749	0	0	0.502086	0	2	774.909	1548.81	0.718592	39.9326	22259	22259	MS2	21/26	20130120_Brassica_A6.raw
	High	QVQcISFIAYKPPSFTGA	Unambiguous	3	2	Bra028181 ;Bra028406	C4(Carbamidomethyl)	HCD	1	0	1	1	322	4.03581	0	0	0.92657	32	2	1007.51	2014.01	1.13482	42.9608	23969	23969	MS2	15/34	20130120_Brassica_A6.raw
	High	LPLFGcTDSAQVLK	Unambiguous	5	2	Bra028181 ;Bra028406	C6(Carbamidomethyl)	HCD	1	0	1	1	387	4.02937	0	0	12.9959	3	1	1548.81	1548.81	-2.1495	39.9949	22295	22295	MS2	20/26	20130120_Brassica_A6.raw
	High	KKFETLSYLPDVTDVELAK	Unambiguous	1	1	Bra028406		HCD	1	0	1	1	239	4.02422	0	2	73.0043	50	4	549.801	2196.18	0.292052	40.6625	22506	22506	MS2	34/108	20130120_Brassica_A7.raw
	High	QVQcISFIAYKPPSFTGA	Unambiguous	3	2	Bra028181 ;Bra028406	C4(Carbamidomethyl)	HCD	1	0	1	1	314	3.99882	0	0	0	9	2	1007.51	2014.01	-0.865329	43.4715	24257	24257	MS2	16/34	20130120_Brassica_A6.raw
	High	QVQcISFIAYKPPSFTGA	Unambiguous	3	2	Bra028181 ;Bra028406	C4(Carbamidomethyl)	HCD	1	0	1	1	317	3.99801	0	0	6.1768	50	2	1007.51	2014.01	0.346883	45.3212	25301	25301	MS2	15/34	20130120_Brassica_A6.raw
	High	LPLFGcTDSAQVLK	Unambiguous	5	2	Bra028181 ;Bra028406	C6(Carbamidomethyl)	HCD	1	0	1	1	378	3.9862	0	0	0.502744	1	2	774.908	1548.81	-0.463642	40.3097	22308	22308	MS2	18/26	20130120_Brassica_A7.raw
	High	LPLFGcTDSAQVLK	Unambiguous	5	2	Bra028181 ;Bra028406	C6(Carbamidomethyl)	HCD	1	0	1	1	395	3.97261	0	0	4.97257	50	2	774.908	1548.81	0.00925227	88.0338	49304	49304	MS2	21/26	20130120_Brassica_A6.raw
	High	LPLFGcTDSAQVLK	Unambiguous	5	2	Bra028181 ;Bra028406	C6(Carbamidomethyl)	HCD	1	0	1	1	396	3.96249	0	0	12.338	50	2	774.908	1548.81	-0.0695633	87.7352	49135	49135	MS2	21/26	20130120_Brassica_A6.raw
	High	LPLFGcTDSAQVLK	Unambiguous	5	2	Bra028181 ;Bra028406	C6(Carbamidomethyl)	HCD	1	0	1	1	400	3.95726	0	0	35.1883	50	2	774.911	1548.81	3.00424	39.9119	22265	22265	MS2	18/26	20130120_Brassica_A4.raw
	High	QVQcISFIAYKPPSFTGA	Unambiguous	3	2	Bra028181 ;Bra028406	C4(Carbamidomethyl)	HCD	1	0	1	1	331	3.95215	0	0	0.0932679	1	2	1007.51	2014.01	0.649936	44.5203	24851	24851	MS2	15/34	20130120_Brassica_A6.raw
	High	LPLFGcTDSAQVLK	Unambiguous	5	2	Bra028181 ;Bra028406	C6(Carbamidomethyl)	HCD	1	0	1	1	329	3.92962	0	0	0	50	1	1548.81	1548.81	0.136157	39.3651	22060	22060	MS2	19/26	20130120_Brassica_A3.raw
	High	LPLFGcTDSAQVLK	Unambiguous	5	2	Bra028181 ;Bra028406	C6(Carbamidomethyl)	HCD	1	0	1	1	390	3.92083	0	0	0	28	2	774.907	1548.81	-1.88233	83.3284	46667	46667	MS2	21/26	20130120_Brassica_A6.raw
	High	QVQcISFIAYKPPSFTGA	Unambiguous	3	2	Bra028181 ;Bra028406	C4(Carbamidomethyl)	HCD	1	0	1	1	320	3.91357	0	0	0	14	2	1007.51	2014.01	-0.441054	44.2312	24667	24667	MS2	15/34	20130120_Brassica_A2.raw
	High	FETLSYLPDVTDVELAK	Unambiguous	1	1	Bra028406		HCD	1	0	1	1	284	3.90067	0	0	11.5985	50	2	970.501	1939.99	1.97976	46.7163	26085	26085	MS2	19/32	20130120_Brassica_A6.raw
	High	LPLFGcTDSAQVLK	Unambiguous	5	2	Bra028181 ;Bra028406	C6(Carbamidomethyl)	HCD	1	0	1	1	404	3.88362	0	0	0	13	3	516.94	1548.81	-1.77278	39.7683	22166	22166	MS2	19/52	20130120_Brassica_A6.raw
	High	LPLFGcTDSAQVLKEVQEcK	Unambiguous	5	2	Bra028181 ;Bra028406	C6(Carbamidomethyl); C19(Carbamidomethyl)	HCD	1	0	1	1	410	3.8802	0	1	86.8881	18	3	774.719	2322.14	-2.57304	42.3019	23598	23598	MS2	24/76	20130120_Brassica_A6.raw
	High	QVQcISFIAYKPPSFTGA	Unambiguous	3	2	Bra028181 ;Bra028406	C4(Carbamidomethyl)	HCD	1	0	1	1	309	3.87336	0	0	0	50	2	1007.51	2014.01	-1.47144	83.3752	46694	46694	MS2	15/34	20130120_Brassica_A6.raw
	High	QVQcISFIAYKPPSFTGA	Unambiguous	3	2	Bra028181 ;Bra028406	C4(Carbamidomethyl)	HCD	1	0	1	1	317	3.85231	0	0	0	0	2	1007.51	2014.01	-0.0773905	44.2513	24699	24699	MS2	16/34	20130120_Brassica_A6.raw
	High	QVQcISFIAYKPPSFTGA	Unambiguous	3	2	Bra028181 ;Bra028406	C4(Carbamidomethyl)	HCD	1	0	1	1	319	3.84618	0	0	0.615219	6	2	1007.51	2014.01	0.952988	44.7773	24995	24995	MS2	16/34	20130120_Brassica_A6.raw
	High	FETLSYLPDVTDVELAK	Unambiguous	1	1	Bra028406		HCD	1	0	1	1	323	3.84358	0	0	6.57264	50	2	970.501	1940	2.9236	46.1125	25754	25754	MS2	19/32	20130120_Brassica_A4.raw
	High	QVQcISFIAYKPPSFTGA	Unambiguous	3	2	Bra028181 ;Bra028406	C4(Carbamidomethyl)	HCD	1	0	1	1	333	3.82304	0	0	0	21	2	1007.51	2014.01	0.589325	87.0396	48746	48746	MS2	15/34	20130120_Brassica_A6.raw
	High	QVQcISFIAYKPPSFTGA	Unambiguous	3	2	Bra028181 ;Bra028406	C4(Carbamidomethyl)	HCD	1	0	1	1	305	3.81989	0	0	0	4	2	1007.51	2014.01	-0.0773905	44.2115	24689	24689	MS2	16/34	20130120_Brassica_A4.raw
	High	WIPcVEFELEHGFVYR	Unambiguous	4	3	Bra025431 ;Bra028181 ;Bra028406	C4(Carbamidomethyl)	HCD	1	0	1	1	351	3.80334	0	0	13.6772	50	2	1041	2080.99	-2.514	46.9753	26231	26231	MS2	16/30	20130120_Brassica_A6.raw
	High	QVQcISFIAYKPPSFTGA	Unambiguous	3	2	Bra028181 ;Bra028406	C4(Carbamidomethyl)	HCD	1	0	1	1	344	3.80134	0	0	0	50	2	1007.51	2014.01	2.04398	46.6339	26039	26039	MS2	16/34	20130120_Brassica_A6.raw
	High	LPLFGcTDSAQVLK	Unambiguous	5	2	Bra028181 ;Bra028406	C6(Carbamidomethyl)	HCD	1	0	1	1	355	3.79689	0	0	3.60011	6	2	774.909	1548.81	1.19148	40.7114	22701	22701	MS2	19/26	20130120_Brassica_A6.raw
	High	IIGFDNNRQVQcISFIAYKPPSFTGA	Unambiguous	3	2	Bra028181 ;Bra028406	C12(Carbamidomethyl)	HCD	1	0	1	1	405	3.79121	0	1	14.482	50	3	981.834	2943.49	2.16964	45.9437	25653	25653	MS2	25/100	20130120_Brassica_A6.raw
	High	EVQEcKTEYPNAFIR	Unambiguous	4	3	Bra025431 ;Bra028181 ;Bra028406	C5(Carbamidomethyl)	HCD	1	0	1	1	367	3.76915	0	1	35.5882	20	3	628.636	1883.89	-0.53497	31.4398	17456	17456	MS2	20/56	20130120_Brassica_A5.raw
	High	EVQEcKTEYPNAFIR	Unambiguous	4	3	Bra025431 ;Bra028181 ;Bra028406	C5(Carbamidomethyl)	HCD	1	0	1	1	345	3.76646	0	1	0	50	2	942.456	1883.9	4.91507	31.4216	17445	17445	MS2	19/28	20130120_Brassica_A5.raw
	High	WIPcVEFELEHGFVYR	Unambiguous	4	3	Bra025431 ;Bra028181 ;Bra028406	C4(Carbamidomethyl)	HCD	1	0	1	1	396	3.76302	0	0	83.5434	50	3	694.333	2080.99	-4.72021	46.4982	25964	25964	MS2	24/60	20130120_Brassica_A6.raw
	High	FETLSYLPDVTDVELAKEVDYLLR	Unambiguous	1	1	Bra028406		HCD	1	0	1	1	326	3.75722	0	1		50	3	943.493	2828.46	1.25228	55.5277	31026	31026	MS2	25/92	20130120_Brassica_A6.raw
	High	QVQcISFIAYKPPSFTGA	Unambiguous	3	2	Bra028181 ;Bra028406	C4(Carbamidomethyl)	HCD	1	0	1	1	397	3.75336	0	0	9.60656	32	3	672.01	2014.01	2.27974	87.0262	48739	48739	MS2	19/68	20130120_Brassica_A6.raw
	High	LPLFGcTDSAQVLK	Unambiguous	5	2	Bra028181 ;Bra028406	C6(Carbamidomethyl)	HCD	1	0	1	1	380	3.74063	0	0	1.04791	1	2	774.908	1548.81	0.324515	40.1737	22412	22412	MS2	19/26	20130120_Brassica_A4.raw
	High	NKWIPcVEFELEHGFVYR	Unambiguous	4	3	Bra025431 ;Bra028181 ;Bra028406	C6(Carbamidomethyl)	HCD	1	0	1	1	418	3.73621	0	1	43.9262	50	3	775.048	2323.13	-1.84668	45.4808	25391	25391	MS2	25/68	20130120_Brassica_A6.raw
	High	EVQEcKTEYPNAFIR	Unambiguous	4	3	Bra025431 ;Bra028181 ;Bra028406	C5(Carbamidomethyl)	HCD	1	0	1	1	347	3.71961	0	1	20.5536	50	2	942.45	1883.89	-1.43499	31.5139	17492	17492	MS2	18/28	20130120_Brassica_A4.raw
	High	QVQcISFIAYKPPSFTGA	Unambiguous	3	2	Bra028181 ;Bra028406	C4(Carbamidomethyl)	HCD	1	0	1	1	384	3.71827	0	0	6.38938	50	3	672.009	2014.01	1.4615	91.3645	51165	51165	MS2	17/68	20130120_Brassica_A6.raw
	High	LPLFGcTDSAQVLK	Unambiguous	5	2	Bra028181 ;Bra028406	C6(Carbamidomethyl)	HCD	1	0	1	1	370	3.71814	0	0	2.12125	25	2	774.908	1548.81	-0.621273	87.5246	49016	49016	MS2	18/26	20130120_Brassica_A6.raw
	High	QVQcISFIAYKPPSFTGA	Unambiguous	3	2	Bra028181 ;Bra028406	C4(Carbamidomethyl)	HCD	1	0	1	1	317	3.71325	0	0	0	50	2	1007.51	2014.01	-0.441054	87.5564	49034	49034	MS2	15/34	20130120_Brassica_A6.raw
	High	WIPcVEFELEHGFVYR	Unambiguous	4	3	Bra025431 ;Bra028181 ;Bra028406	C4(Carbamidomethyl)	HCD	1	0	1	1	379	3.70412	0	0	14.4609	30	3	694.336	2080.99	-0.144741	46.6097	26159	26159	MS2	23/60	20130120_Brassica_A3.raw
	High	QVQcISFIAYKPPSFTGA	Unambiguous	3	2	Bra028181 ;Bra028406	C4(Carbamidomethyl)	HCD	1	0	1	1	311	3.67836	0	0	0.669207	5	2	1007.51	2014.01	0.892378	44.4888	24811	24811	MS2	15/34	20130120_Brassica_A2.raw
	High	WIPcVEFELEHGFVYR	Unambiguous	4	3	Bra025431 ;Bra028181 ;Bra028406	C4(Carbamidomethyl)	HCD	1	0	1	1	334	3.67777	0	0	2.38014	7	2	1041	2080.99	-0.871526	47.0415	26269	26269	MS2	16/30	20130120_Brassica_A6.raw
	High	LPLFGcTDSAQVLK	Unambiguous	5	2	Bra028181 ;Bra028406	C6(Carbamidomethyl)	HCD	1	0	1	1	379	3.66847	0	0	0	50	2	774.909	1548.81	1.42793	92.6678	51887	51887	MS2	19/26	20130120_Brassica_A6.raw
	High	FETLSYLPDVTDVELAK	Unambiguous	1	1	Bra028406		HCD	1	0	1	1	299	3.66504	0	0	0.0501098	4	2	970.499	1939.99	0.0920641	46.4288	25924	25924	MS2	17/32	20130120_Brassica_A6.raw
	High	EVQEcKTEYPNAFIR	Unambiguous	4	3	Bra025431 ;Bra028181 ;Bra028406	C5(Carbamidomethyl)	HCD	1	0	1	1	349	3.6608	0	1	0	50	2	942.453	1883.9	1.99924	31.5569	17498	17498	MS2	17/28	20130120_Brassica_A2.raw
	High	WIPcVEFELEHGFVYR	Unambiguous	4	3	Bra025431 ;Bra028181 ;Bra028406	C4(Carbamidomethyl)	HCD	1	0	1	1	339	3.65652	0	0	1.16223	6	2	1041	2080.99	-1.10616	47.2421	26381	26381	MS2	16/30	20130120_Brassica_A6.raw
	High	QVQcISFIAYKPPSFTGA	Unambiguous	3	2	Bra028181 ;Bra028406	C4(Carbamidomethyl)	HCD	1	0	1	1	335	3.64064	0	0	0	26	2	1007.51	2014.01	0.589325	87.2979	48890	48890	MS2	16/34	20130120_Brassica_A6.raw
	High	EVQEcKTEYPNAFIR	Unambiguous	4	3	Bra025431 ;Bra028181 ;Bra028406	C5(Carbamidomethyl)	HCD	1	0	1	1	354	3.6383	0	1	21.5891	42	3	628.636	1883.89	-1.02095	32.2163	17772	17772	MS2	18/56	20130120_Brassica_A7.raw
	High	LPLFGcTDSAQVLK	Unambiguous	5	2	Bra028181 ;Bra028406	C6(Carbamidomethyl)	HCD	1	0	1	1	370	3.63716	0	0	3.99396	50	2	774.908	1548.81	-0.621273	83.0611	46515	46515	MS2	19/26	20130120_Brassica_A6.raw
	High	KKFETLSYLPDVTDVELAK	Unambiguous	1	1	Bra028406		HCD	1	0	1	1	248	3.63474	0	2	5.1424	50	3	732.73	2196.17	-2.39761	40.1575	22389	22389	MS2	21/72	20130120_Brassica_A6.raw
	High	KFETLSYLPDVTDVELAK	Unambiguous	1	1	Bra028406		HCD	1	0	1	1	310	3.62461	0	1	1.54829	11	3	690.033	2068.09	0.139226	43.0648	24029	24029	MS2	21/68	20130120_Brassica_A6.raw
	High	LPLFGcTDSAQVLK	Unambiguous	5	2	Bra028181 ;Bra028406	C6(Carbamidomethyl)	HCD	1	0	1	1	387	3.62435	0	0	0	50	2	774.91	1548.81	2.84661	92.57	51834	51834	MS2	18/26	20130120_Brassica_A6.raw
	High	LPLFGcTDSAQVLK	Unambiguous	5	2	Bra028181 ;Bra028406	C6(Carbamidomethyl)	HCD	1	0	1	1	377	3.61298	0	0	2.18334	11	2	774.908	1548.81	-0.542457	40.5661	22452	22452	MS2	18/26	20130120_Brassica_A7.raw
	High	LPLFGcTDSAQVLK	Unambiguous	5	2	Bra028181 ;Bra028406	C6(Carbamidomethyl)	HCD	1	0	1	1	372	3.61203	0	0	79.4622	24	2	774.907	1548.81	-1.09417	42.2858	23589	23589	MS2	18/26	20130120_Brassica_A6.raw
	High	LPLFGcTDSAQVLK	Unambiguous	5	2	Bra028181 ;Bra028406	C6(Carbamidomethyl)	HCD	1	0	1	1	393	3.57328	0	0	21.5935	23	2	774.909	1548.81	0.876223	40.4444	22564	22564	MS2	19/26	20130120_Brassica_A4.raw
	High	KFETLSYLPDVTDVELAK	Unambiguous	1	1	Bra028406		HCD	1	0	1	1	313	3.57142	0	1	17.6856	50	3	690.034	2068.09	1.55584	91.5364	51260	51260	MS2	21/68	20130120_Brassica_A6.raw
	High	LPLFGcTDSAQVLK	Unambiguous	5	2	Bra028181 ;Bra028406	C6(Carbamidomethyl)	HCD	1	0	1	1	381	3.56996	0	0	8.74599	50	2	774.908	1548.81	-0.463642	40.3502	22499	22499	MS2	17/26	20130120_Brassica_A6.raw
	High	KFETLSYLPDVTDVELAK	Unambiguous	1	1	Bra028406		HCD	1	0	1	1	317	3.56431	0	1	7.0843	50	3	690.034	2068.09	1.02461	43.6908	24205	24205	MS2	21/68	20130120_Brassica_A7.raw
	High	KFETLSYLPDVTDVELAK	Unambiguous	1	1	Bra028406		HCD	1	0	1	1	304	3.56368	0	1	3.76523	30	3	690.034	2068.09	0.847534	43.1871	24114	24114	MS2	24/68	20130120_Brassica_A4.raw
	High	QVQcISFIAYKPPSFTGA	Unambiguous	3	2	Bra028181 ;Bra028406	C4(Carbamidomethyl)	HCD	1	0	1	1	328	3.56327	0	0	2.83722	50	2	1007.51	2014.02	4.22594	84.4109	47279	47279	MS2	15/34	20130120_Brassica_A6.raw
	High	LPLFGcTDSAQVLK	Unambiguous	5	2	Bra028181 ;Bra028406	C6(Carbamidomethyl)	HCD	1	0	1	1	380	3.5547	0	0	11.5389	50	2	774.91	1548.81	2.76779	92.0922	51570	51570	MS2	16/26	20130120_Brassica_A6.raw
	High	KFETLSYLPDVTDVELAK	Unambiguous	1	1	Bra028406		HCD	1	0	1	1	251	3.54687	0	1	4.38091	29	2	1034.55	2068.09	2.3887	42.6886	23952	23952	MS2	15/34	20130120_Brassica_A3.raw
	High	QVQcISFIAYKPPSFTGA	Unambiguous	3	2	Bra028181 ;Bra028406	C4(Carbamidomethyl)	HCD	1	0	1	1	318	3.54515	0	0	0	50	2	1007.51	2014.01	0.0438306	87.8122	49178	49178	MS2	15/34	20130120_Brassica_A6.raw
	High	QVQcISFIAYKPPSFTGA	Unambiguous	3	2	Bra028181 ;Bra028406	C4(Carbamidomethyl)	HCD	1	0	1	1	324	3.5428	0	0	0	50	2	1007.51	2014.01	-0.683497	83.6433	46847	46847	MS2	14/34	20130120_Brassica_A6.raw
	High	QVQcISFIAYKPPSFTGA	Unambiguous	3	2	Bra028181 ;Bra028406	C4(Carbamidomethyl)	HCD	1	0	1	1	311	3.54192	0	0	3.16142	50	2	1007.51	2014.01	0.407494	44.7451	24955	24955	MS2	16/34	20130120_Brassica_A2.raw
	High	KKFETLSYLPDVTDVELAK	Unambiguous	1	1	Bra028406		HCD	1	0	1	1	230	3.54164	0	2	0	48	4	549.801	2196.18	0.180886	40.1861	22405	22405	MS2	30/108	20130120_Brassica_A6.raw
	High	QVQcISFIAYKPPSFTGA	Unambiguous	3	2	Bra028181 ;Bra028406	C4(Carbamidomethyl)	HCD	1	0	1	1	324	3.53672	0	0	0	50	2	1007.51	2014.01	-0.744107	83.9003	46991	46991	MS2	15/34	20130120_Brassica_A6.raw
	High	WIPcVEFELEHGFVYR	Unambiguous	4	3	Bra025431 ;Bra028181 ;Bra028406	C4(Carbamidomethyl)	HCD	1	0	1	1	350	3.52244	0	0	23.9147	50	2	1041	2080.99	-2.39668	46.8354	26173	26173	MS2	15/30	20130120_Brassica_A5.raw
	High	QVQcISFIAYKPPSFTGA	Unambiguous	3	2	Bra028181 ;Bra028406	C4(Carbamidomethyl)	HCD	1	0	1	1	383	3.51962	0	0	0	50	3	672.008	2014.01	-0.447731	87.5577	49035	49035	MS2	16/68	20130120_Brassica_A6.raw
	High	KKFETLSYLPDVTDVELAK	Unambiguous	1	1	Bra028406		HCD	1	0	1	1	222	3.51067	0	2	0.28551	1	4	549.802	2196.18	2.29304	40.4551	22557	22557	MS2	33/108	20130120_Brassica_A6.raw
	High	QVQcISFIAYKPPSFTGA	Unambiguous	3	2	Bra028181 ;Bra028406	C4(Carbamidomethyl)	HCD	1	0	1	1	319	3.46803	0	0	0	49	2	1007.51	2014.01	0.649936	44.6921	24765	24765	MS2	15/34	20130120_Brassica_A7.raw
	High	WIPcVEFELEHGFVYR	Unambiguous	4	3	Bra025431 ;Bra028181 ;Bra028406	C4(Carbamidomethyl)	HCD	1	0	1	1	377	3.4674	0	0	32.53	50	3	694.335	2080.99	-1.90453	46.8715	26215	26215	MS2	21/60	20130120_Brassica_A1.raw
	High	QVQcISFIAYKPPSFTGA	Unambiguous	3	2	Bra028181 ;Bra028406	C4(Carbamidomethyl)	HCD	1	0	1	1	386	3.45161	0	0	4.16666	12	3	672.008	2014.01	-0.720478	44.4998	24657	24657	MS2	17/68	20130120_Brassica_A7.raw
	High	LPLFGcTDSAQVLK	Unambiguous	5	2	Bra028181 ;Bra028406	C6(Carbamidomethyl)	HCD	1	0	1	1	375	3.44489	0	0	0	50	2	774.909	1548.81	0.482146	93.195	52179	52179	MS2	18/26	20130120_Brassica_A6.raw
	High	LPLFGcTDSAQVLK	Unambiguous	5	2	Bra028181 ;Bra028406	C6(Carbamidomethyl)	HCD	1	0	1	1	353	3.44484	0	0	3.32764	2	2	774.909	1548.81	1.34912	39.4579	22111	22111	MS2	17/26	20130120_Brassica_A3.raw
	High	QVQcISFIAYKPPSFTGA	Unambiguous	3	2	Bra028181 ;Bra028406	C4(Carbamidomethyl)	HCD	1	0	1	1	378	3.42454	0	0	8.01499	12	3	672.008	2014.01	-0.174983	44.0826	24629	24629	MS2	16/68	20130120_Brassica_A5.raw
	High	LPLFGcTDSAQVLK	Unambiguous	5	2	Bra028181 ;Bra028406	C6(Carbamidomethyl)	HCD	1	0	1	1	396	3.42286	0	0	29.0394	23	3	516.941	1548.81	0.237017	40.0272	22314	22314	MS2	22/52	20130120_Brassica_A6.raw
	High	QVQcISFIAYKPPSFTGA	Unambiguous	3	2	Bra028181 ;Bra028406	C4(Carbamidomethyl)	HCD	1	0	1	1	334	3.42124	0	0	0	50	2	1007.51	2014.01	0.649936	91.7416	51374	51374	MS2	14/34	20130120_Brassica_A6.raw
	High	LPLFGcTDSAQVLK	Unambiguous	5	2	Bra028181 ;Bra028406	C6(Carbamidomethyl)	HCD	1	0	1	1	384	3.41928	0	0	2.78432	1	2	774.908	1548.81	-0.148379	39.8856	22259	22259	MS2	18/26	20130120_Brassica_A5.raw
	High	EVQEcKTEYPNAFIR	Unambiguous	4	3	Bra025431 ;Bra028181 ;Bra028406	C5(Carbamidomethyl)	HCD	1	0	1	1	356	3.41847	0	1	78.9625	9	3	628.636	1883.89	-1.02095	31.8151	17642	17642	MS2	20/56	20130120_Brassica_A6.raw
	High	KFETLSYLPDVTDVELAK	Unambiguous	1	1	Bra028406		HCD	1	0	1	1	169	3.41097	0	1	9.32296	50	2	1034.55	2068.1	4.86777	91.5686	51278	51278	MS2	16/34	20130120_Brassica_A6.raw
	High	EHGNTPGYYDGR	Unambiguous	1	1	Bra028406		HCD	1	0	1	1	65	3.40291	0	0	4.52198	50	3	455.865	1365.58	-0.580689	22.1786	12157	12157	MS2	22/44	20130120_Brassica_A6.raw
	High	EVQECKTEYPNAFIR	Unambiguous	4	3	Bra025431 ;Bra028181 ;Bra028406		HCD	1	0	1	1	363	3.39592	0	1	17.0713	13	3	609.636	1826.89	9.79406	31.1427	17257	17257	MS2	22/56	20130120_Brassica_A6.raw
	High	LPLFGcTDSAQVLK	Unambiguous	5	2	Bra028181 ;Bra028406	C6(Carbamidomethyl)	HCD	1	0	1	1	371	3.39401	0	0	3.51931	50	2	774.909	1548.81	0.876223	92.9281	52031	52031	MS2	17/26	20130120_Brassica_A6.raw
	High	QVQcISFIAYKPPSFTGA	Unambiguous	3	2	Bra028181 ;Bra028406	C4(Carbamidomethyl)	HCD	1	0	1	1	386	3.37435	0	0	18.6849	49	3	672.008	2014.01	-0.538647	84.1931	47157	47157	MS2	21/68	20130120_Brassica_A6.raw
	High	NKWIPcVEFELEHGFVYR	Unambiguous	4	3	Bra025431 ;Bra028181 ;Bra028406	C6(Carbamidomethyl)	HCD	1	0	1	1	418	3.36403	0	1	50.9391	50	3	775.048	2323.13	-0.979675	45.3441	25315	25315	MS2	21/68	20130120_Brassica_A6.raw
	High	LPLFGcTDSAQVLK	Unambiguous	5	2	Bra028181 ;Bra028406	C6(Carbamidomethyl)	HCD	1	0	1	1	405	3.35175	0	0	31.0543	50	2	774.908	1548.81	0.0880679	43.1047	24050	24050	MS2	16/26	20130120_Brassica_A6.raw
	High	EVQECKTEYPNAFIR	Unambiguous	4	3	Bra025431 ;Bra028181 ;Bra028406		HCD	1	0	1	1	370	3.34831	0	1	14.2779	17	3	609.635	1826.89	9.39316	30.8732	17104	17104	MS2	23/56	20130120_Brassica_A6.raw
	High	QVQcISFIAYKPPSFTGA	Unambiguous	3	2	Bra028181 ;Bra028406	C4(Carbamidomethyl)	HCD	1	0	1	1	361	3.33751	0	0	0	50	2	1007.51	2014.02	5.55936	42.693	23820	23820	MS2	16/34	20130120_Brassica_A6.raw
	High	QVQcISFIAYKPPSFTGA	Unambiguous	3	2	Bra028181 ;Bra028406	C4(Carbamidomethyl)	HCD	1	0	1	1	323	3.33646	0	0	0	39	2	1007.51	2014.01	-0.622886	84.1557	47135	47135	MS2	14/34	20130120_Brassica_A6.raw
	High	QVQcISFIAYKPPSFTGA	Unambiguous	3	2	Bra028181 ;Bra028406	C4(Carbamidomethyl)	HCD	1	0	1	1	327	3.33608	0	0	17.9826	50	2	1007.51	2014.01	0.407494	44.5094	24887	24887	MS2	15/34	20130120_Brassica_A1.raw
	High	KKFETLSYLPDVTDVELAK	Unambiguous	1	1	Bra028406		HCD	1	0	1	1	229	3.31776	0	2	17.208	50	3	732.732	2196.18	0.770629	40.2599	22431	22431	MS2	20/72	20130120_Brassica_A2.raw
	High	WIPcVEFELEHGFVYR	Unambiguous	4	3	Bra025431 ;Bra028181 ;Bra028406	C4(Carbamidomethyl)	HCD	1	0	1	1	331	3.3054	0	0	5.18286	50	2	1041	2081	2.64804	47.2274	26346	26346	MS2	16/30	20130120_Brassica_A2.raw
	High	LPLFGcTDSAQVLK	Unambiguous	5	2	Bra028181 ;Bra028406	C6(Carbamidomethyl)	HCD	1	0	1	1	395	3.30126	0	0	21.1069	50	2	774.91	1548.81	2.53134	91.3393	51101	51101	MS2	18/26	20130120_Brassica_A2.raw
	High	QVQcISFIAYKPPSFTGA	Unambiguous	3	2	Bra028181 ;Bra028406	C4(Carbamidomethyl)	HCD	1	0	1	1	366	3.28057	0	0	0	50	2	1007.51	2014.01	-0.380444	46.8914	26183	26183	MS2	13/34	20130120_Brassica_A6.raw
	High	WIPcVEFELEHGFVYR	Unambiguous	4	3	Bra025431 ;Bra028181 ;Bra028406	C4(Carbamidomethyl)	HCD	1	0	1	1	302	3.27898	0	0	25.2294	50	2	1041	2081	2.76536	46.9214	26243	26243	MS2	16/30	20130120_Brassica_A1.raw
	High	QVQcISFIAYKPPSFTGA	Unambiguous	3	2	Bra028181 ;Bra028406	C4(Carbamidomethyl)	HCD	1	0	1	1	381	3.25862	0	0	1.39119	0	3	672.008	2014.01	-1.17506	44.1097	24618	24618	MS2	16/68	20130120_Brassica_A6.raw
	High	KKFETLSYLPDVTDVELAK	Unambiguous	1	1	Bra028406		HCD	1	0	1	1	217	3.25376	0	2	29.5081	50	3	732.734	2196.19	3.02173	91.7162	51361	51361	MS2	23/72	20130120_Brassica_A6.raw
	High	LPLFGcTDSAQVLK	Unambiguous	5	2	Bra028181 ;Bra028406	C6(Carbamidomethyl)	HCD	1	0	1	1	378	3.25107	0	0	15.005	50	2	774.907	1548.81	-0.936536	44.9895	25116	25116	MS2	16/26	20130120_Brassica_A6.raw
	High	KFETLSYLPDVTDVELAK	Unambiguous	1	1	Bra028406		HCD	1	0	1	1	336	3.24594	0	1	19.0732	22	3	690.033	2068.08	-0.214929	42.7229	23972	23972	MS2	20/68	20130120_Brassica_A3.raw
	High	LPLFGcTDSAQVLK	Unambiguous	5	2	Bra028181 ;Bra028406	C6(Carbamidomethyl)	HCD	1	0	1	1	368	3.24021	0	0	10.0526	50	2	774.908	1548.81	-0.621273	88.2911	49449	49449	MS2	19/26	20130120_Brassica_A6.raw
	High	KKFETLSYLPDVTDVELAK	Unambiguous	1	1	Bra028406		HCD	1	0	1	1	238	3.22607	0	2	0.249169	1	3	732.732	2196.18	0.270383	40.4218	22538	22538	MS2	19/72	20130120_Brassica_A6.raw
	High	QVQcISFIAYKPPSFTGA	Unambiguous	3	2	Bra028181 ;Bra028406	C4(Carbamidomethyl)	HCD	1	0	1	1	318	3.20057	0	0	0	9	2	1007.51	2014.01	-0.01678	43.2167	24113	24113	MS2	14/34	20130120_Brassica_A6.raw
	High	YWTmWKLPLFGcTDSAQVLK	Unambiguous	5	2	Bra028181 ;Bra028406	M4(Oxidation); C12(Carbamidomethyl)	HCD	1	0	1	1	385	3.19425	0	1	0	50	3	820.739	2460.2	-3.29948	48.404	27033	27033	MS2	25/76	20130120_Brassica_A6.raw
	High	LPLFGcTDSAQVLK	Unambiguous	5	2	Bra028181 ;Bra028406	C6(Carbamidomethyl)	HCD	1	0	1	1	369	3.17452	0	0	23.916	9	2	774.909	1548.81	1.03385	40.2703	22436	22436	MS2	15/26	20130120_Brassica_A2.raw
	High	EVQEcKTEYPNAFIR	Unambiguous	4	3	Bra025431 ;Bra028181 ;Bra028406	C5(Carbamidomethyl)	HCD	1	0	1	1	289	3.16612	0	1	0	50	2	942.446	1883.89	-5.64681	32.1936	17862	17862	MS2	13/28	20130120_Brassica_A6.raw
	High	KFETLSYLPDVTDVELAK	Unambiguous	1	1	Bra028406		HCD	1	0	1	1	194	3.16173	0	1	12.241	50	2	1034.55	2068.09	1.9165	43.1788	24078	24078	MS2	15/34	20130120_Brassica_A2.raw
	High	QVQcISFIAYKPPSFTGA	Unambiguous	3	2	Bra028181 ;Bra028406	C4(Carbamidomethyl)	HCD	1	0	1	1	372	3.15526	0	0	0	50	2	1007.51	2014.01	-0.683497	47.5674	26564	26564	MS2	15/34	20130120_Brassica_A6.raw
	High	FETLSYLPDVTDVELAK	Unambiguous	1	1	Bra028406		HCD	1	0	1	1	320	3.15502	0	0	5.80334	50	2	970.5	1939.99	0.910064	46.1295	25796	25796	MS2	17/32	20130120_Brassica_A1.raw
	High	KFETLSYLPDVTDVELAK	Unambiguous	1	1	Bra028406		HCD	1	0	1	1	306	3.14696	0	1	0.189818	1	3	690.034	2068.09	0.581919	43.3284	24177	24177	MS2	22/68	20130120_Brassica_A6.raw
	High	QVQcISFIAYKPPSFTGA	Unambiguous	3	2	Bra028181 ;Bra028406	C4(Carbamidomethyl)	HCD	1	0	1	1	379	3.14546	0	0	5.3334	50	3	672.008	2014.01	0.0977647	84.4595	47306	47306	MS2	17/68	20130120_Brassica_A6.raw
	High	QVQcISFIAYKPPSFTGA	Unambiguous	3	2	Bra028181 ;Bra028406	C4(Carbamidomethyl)	HCD	1	0	1	1	346	3.14001	0	0	3.45531	41	2	1007.51	2014.01	-2.3806	43.5777	24456	24456	MS2	14/34	20130120_Brassica_A3.raw
	High	KFETLSYLPDVTDVELAK	Unambiguous	1	1	Bra028406		HCD	1	0	1	1	305	3.13629	0	1	32.6654	50	3	690.034	2068.09	0.847534	43.1251	24110	24110	MS2	21/68	20130120_Brassica_A1.raw
	High	QVQcISFIAYKPPSFTGA	Unambiguous	3	2	Bra028181 ;Bra028406	C4(Carbamidomethyl)	HCD	1	0	1	1	325	3.13547	0	0	0	50	2	1007.51	2014.01	-2.19877	46.3779	25895	25895	MS2	13/34	20130120_Brassica_A6.raw
	High	WIPcVEFELEHGFVYR	Unambiguous	4	3	Bra025431 ;Bra028181 ;Bra028406	C4(Carbamidomethyl)	HCD	1	0	1	1	372	3.13237	0	0	12.5256	13	3	694.338	2081	1.70303	47.4206	26482	26482	MS2	21/60	20130120_Brassica_A6.raw
	High	QVQcISFIAYKPPSFTGA	Unambiguous	3	2	Bra028181 ;Bra028406	C4(Carbamidomethyl)	HCD	1	0	1	1	358	3.12868	0	0	1.23014	14	2	1007.51	2014.01	-1.47144	49.7839	27803	27803	MS2	13/34	20130120_Brassica_A6.raw
	High	LPLFGcTDSAQVLK	Unambiguous	5	2	Bra028181 ;Bra028406	C6(Carbamidomethyl)	HCD	1	0	1	1	403	3.1266	0	0	48.9233	8	2	774.908	1548.81	-0.30601	39.6201	22109	22109	MS2	16/26	20130120_Brassica_A5.raw
	High	LPLFGcTDSAQVLK	Unambiguous	5	2	Bra028181 ;Bra028406	C6(Carbamidomethyl)	HCD	1	0	1	1	383	3.11733	0	0	21.8811	50	2	774.909	1548.81	1.66438	42.8333	23898	23898	MS2	16/26	20130120_Brassica_A6.raw
	High	QVQcISFIAYKPPSFTGA	Unambiguous	3	2	Bra028181 ;Bra028406	C4(Carbamidomethyl)	HCD	1	0	1	1	343	3.11183	0	0	0	50	2	1007.51	2014.02	4.34716	91.3345	51107	51107	MS2	14/34	20130120_Brassica_A4.raw
	High	LPLFGcTDSAQVLK	Unambiguous	5	2	Bra028181 ;Bra028406	C6(Carbamidomethyl)	HCD	1	0	1	1	379	3.10519	0	0	0	50	2	774.909	1548.81	1.50675	40.8237	22597	22597	MS2	16/26	20130120_Brassica_A7.raw
	High	KFETLSYLPDVTDVELAK	Unambiguous	1	1	Bra028406		HCD	1	0	1	1	345	3.10046	0	1	12.3189	50	3	690.031	2068.08	-2.4284	43.1114	24040	24040	MS2	19/68	20130120_Brassica_A2.raw
	High	LPLFGcTDSAQVLK	Unambiguous	5	2	Bra028181 ;Bra028406	C6(Carbamidomethyl)	HCD	1	0	1	1	355	3.08985	0	0	16.1813	50	2	774.909	1548.81	1.19148	91.2394	51055	51055	MS2	16/26	20130120_Brassica_A4.raw
	High	EHGNTPGYYDGR	Unambiguous	1	1	Bra028406		HCD	1	0	1	1	61	3.06566	0	0	8.55835	50	2	683.294	1365.58	-1.08484	22.1814	12159	12159	MS2	15/22	20130120_Brassica_A6.raw
	High	LPLFGcTDSAQVLK	Unambiguous	5	2	Bra028181 ;Bra028406	C6(Carbamidomethyl)	HCD	1	0	1	1	375	3.06456	0	0	8.09125	50	2	774.909	1548.81	1.58556	44.4731	24824	24824	MS2	14/26	20130120_Brassica_A6.raw
	High	QVQcISFIAYKPPSFTGA	Unambiguous	3	2	Bra028181 ;Bra028406	C4(Carbamidomethyl)	HCD	1	0	1	1	385	3.04197	0	0	0.956976	44	3	672.008	2014.01	-0.629562	87.2991	48891	48891	MS2	15/68	20130120_Brassica_A6.raw
	High	LPLFGcTDSAQVLK	Unambiguous	5	2	Bra028181 ;Bra028406	C6(Carbamidomethyl)	HCD	1	0	1	1	373	3.03719	0	0	4.42646	50	2	774.909	1548.81	1.50675	91.379	50953	50953	MS2	15/26	20130120_Brassica_A7.raw
	High	EVQEcKTEYPNAFIR	Unambiguous	4	3	Bra025431 ;Bra028181 ;Bra028406	C5(Carbamidomethyl)	HCD	1	0	1	1	367	3.02154	0	1	10.8695	0	3	628.637	1883.9	-0.34058	31.5502	17489	17489	MS2	18/56	20130120_Brassica_A6.raw
	High	NKWIPcVEFELEHGFVYR	Unambiguous	4	3	Bra025431 ;Bra028181 ;Bra028406	C6(Carbamidomethyl)	HCD	1	0	1	1	426	3.02114	0	1	10.7996	50	4	581.538	2323.13	-0.512552	45.3455	25316	25316	MS2	21/102	20130120_Brassica_A6.raw
	High	QVQcISFIAYKPPSFTGA	Unambiguous	3	2	Bra028181 ;Bra028406	C4(Carbamidomethyl)	HCD	1	0	1	1	322	3.0154	0	0	0	50	2	1007.51	2014.01	1.0136	44.3125	24757	24757	MS2	11/34	20130120_Brassica_A5.raw
	High	QVQcISFIAYKPPSFTGA	Unambiguous	3	2	Bra028181 ;Bra028406	C4(Carbamidomethyl)	HCD	0.1325	0	1	1	363	3.01527	0	0	0	50	2	1007.5	2014	-5.22932	43.9963	24599	24599	MS2	14/34	20130120_Brassica_A1.raw
	High	EVQEcKTEYPNAFIR	Unambiguous	4	3	Bra025431 ;Bra028181 ;Bra028406	C5(Carbamidomethyl)	HCD	1	0	1	1	265	3.00416	0	1	0	50	2	942.451	1883.89	-0.463036	32.1566	17739	17739	MS2	13/28	20130120_Brassica_A7.raw
	High	QVQcISFIAYKPPSFTGA	Unambiguous	3	2	Bra028181 ;Bra028406	C4(Carbamidomethyl)	HCD	1	0	1	1	380	2.98838	0	0	7.35794	50	3	672.009	2014.01	1.09784	43.5825	24320	24320	MS2	15/68	20130120_Brassica_A6.raw
	High	QVQcISFIAYKPPSFTGA	Unambiguous	3	2	Bra028181 ;Bra028406	C4(Carbamidomethyl)	HCD	1	0	1	1	323	2.96938	0	0	0	50	2	1007.51	2014.01	-0.622886	86.7823	48602	48602	MS2	13/34	20130120_Brassica_A6.raw
	High	KFETLSYLPDVTDVELAK	Unambiguous	1	1	Bra028406		HCD	1	0	1	1	311	2.96421	0	1	17.268	50	3	690.034	2068.09	1.29023	91.8076	51410	51410	MS2	21/68	20130120_Brassica_A6.raw
	High	WIPcVEFELEHGFVYR	Unambiguous	4	3	Bra025431 ;Bra028181 ;Bra028406	C4(Carbamidomethyl)	HCD	1	0	1	1	376	2.95369	0	0	10.2018	50	3	694.335	2080.99	-2.1685	87.0774	48767	48767	MS2	17/60	20130120_Brassica_A6.raw
	High	WIPcVEFELEHGFVYR	Unambiguous	4	3	Bra025431 ;Bra028181 ;Bra028406	C4(Carbamidomethyl)	HCD	1	0	1	1	383	2.95043	0	0	4.44348	50	3	694.335	2080.99	-2.78443	84.4369	47295	47295	MS2	17/60	20130120_Brassica_A6.raw
	High	LPLFGcTDSAQVLK	Unambiguous	5	2	Bra028181 ;Bra028406	C6(Carbamidomethyl)	HCD	1	0	1	1	368	2.95018	0	0	17.6016	29	2	774.908	1548.81	-0.700089	40.4404	22549	22549	MS2	16/26	20130120_Brassica_A6.raw
	High	LPLFGcTDSAQVLK	Unambiguous	5	2	Bra028181 ;Bra028406	C6(Carbamidomethyl)	HCD	1	0	1	1	364	2.94824	0	0	0	50	2	774.906	1548.8	-2.82812	41.1722	22794	22794	MS2	14/26	20130120_Brassica_A7.raw
	High	WIPcVEFELEHGFVYR	Unambiguous	4	3	Bra025431 ;Bra028181 ;Bra028406	C4(Carbamidomethyl)	HCD	1	0	1	1	388	2.94507	0	0	7.75444	50	3	694.335	2080.99	-1.64056	84.0961	47102	47102	MS2	18/60	20130120_Brassica_A6.raw
	High	KFETLSYLPDVTDVELAK	Unambiguous	1	1	Bra028406		HCD	1	0	1	1	316	2.94467	0	1	6.39283	42	3	690.034	2068.09	1.02461	43.0063	24020	24020	MS2	20/68	20130120_Brassica_A5.raw
	High	FETLSYLPDVTDVELAK	Unambiguous	1	1	Bra028406		HCD	1	0	1	1	294	2.94461	0	0	12.8897	50	2	970.502	1940	3.74159	46.0043	25707	25707	MS2	16/32	20130120_Brassica_A5.raw
	High	QVQcISFIAYKPPSFTGA	Unambiguous	3	2	Bra028181 ;Bra028406	C4(Carbamidomethyl)	HCD	1	0	1	1	363	2.93429	0	0		50	2	1007.51	2014.01	-1.34085	82.4518	46172	46172	MS2	13/34	20130120_Brassica_A6.raw
	High	EHGNTPGYYDGR	Unambiguous	1	1	Bra028406		HCD	1	0	1	1	69	2.92794	0	0	52.7994	50	3	455.865	1365.58	-1.31816	22.4747	12323	12323	MS2	20/44	20130120_Brassica_A6.raw
	High	QVQcISFIAYKPPSFTGA	Unambiguous	3	2	Bra028181 ;Bra028406	C4(Carbamidomethyl)	HCD	1	0	1	1	296	2.92767	0	0	10.6955	36	2	1007.52	2014.02	6.52912	46.1212	25752	25752	MS2	13/34	20130120_Brassica_A6.raw
	High	WIPcVEFELEHGFVYR	Unambiguous	4	3	Bra025431 ;Bra028181 ;Bra028406	C4(Carbamidomethyl)	HCD	1	0	1	1	307	2.92668	0	0	25.8499	50	2	1041	2080.99	-0.988845	47.4986	26525	26525	MS2	13/30	20130120_Brassica_A6.raw
	High	LPLFGcTDSAQVLK	Unambiguous	5	2	Bra028181 ;Bra028406	C6(Carbamidomethyl)	HCD	1	0	1	1	384	2.91522	0	0	21.5038	50	2	774.909	1548.81	1.50675	39.7686	22006	22006	MS2	13/26	20130120_Brassica_A7.raw
	High	FETLSYLPDVTDVELAK	Unambiguous	1	1	Bra028406		HCD	1	0	1	1	358	2.89416	0	0	1.70661	50	3	647.335	1939.99	0.651441	46.2728	25838	25838	MS2	18/64	20130120_Brassica_A6.raw
	High	KKFETLSYLPDVTDVELAK	Unambiguous	1	1	Bra028406		HCD	1	0	1	1	247	2.88611	0	2	34.7589	50	3	732.73	2196.18	-1.81398	39.9162	22296	22296	MS2	21/72	20130120_Brassica_A1.raw
	High	FETLSYLPDVTDVELAK	Unambiguous	1	1	Bra028406		HCD	1	0	1	1	334	2.88359	0	0	0	50	2	970.5	1939.99	1.85391	45.6907	25643	25643	MS2	16/32	20130120_Brassica_A3.raw
	High	QVQcISFIAYKPPSFTGA	Unambiguous	3	2	Bra028181 ;Bra028406	C4(Carbamidomethyl)	HCD	1	0	1	1	355	2.86622	0	0	2.23502	50	2	1007.51	2014	-3.22915	43.9437	24541	24541	MS2	13/34	20130120_Brassica_A4.raw
	High	KKFETLSYLPDVTDVELAK	Unambiguous	1	1	Bra028406		HCD	1	0	1	1	239	2.85541	0	2	44.3192	50	3	732.732	2196.18	0.270383	40.6793	22683	22683	MS2	23/72	20130120_Brassica_A6.raw
	High	EHGNTPGYYDGR	Unambiguous	1	1	Bra028406		HCD	1	0	1	1	79	2.83825	0	0	45.9543	50	3	455.865	1365.58	-0.0443444	22.205	12179	12179	MS2	20/44	20130120_Brassica_A4.raw
	High	QVQcISFIAYKPPSFTGA	Unambiguous	3	2	Bra028181 ;Bra028406	C4(Carbamidomethyl)	HCD	1	0	1	1	275	2.82861	0	0	0	50	2	1007.51	2014.01	-0.441054	92.0006	51518	51518	MS2	13/34	20130120_Brassica_A6.raw
	High	LPLFGcTDSAQVLK	Unambiguous	5	2	Bra028181 ;Bra028406	C6(Carbamidomethyl)	HCD	1	0	1	1	321	2.82323	0	0	54.7549	50	2	774.907	1548.81	-0.936536	88.6685	49662	49662	MS2	18/26	20130120_Brassica_A6.raw
	High	QVQcISFIAYKPPSFTGA	Unambiguous	3	2	Bra028181 ;Bra028406	C4(Carbamidomethyl)	HCD	1	0	1	1	355	2.80679	0	0	0	50	2	1007.51	2014.01	-1.41083	83.1077	46541	46541	MS2	14/34	20130120_Brassica_A6.raw
	High	LPLFGcTDSAQVLK	Unambiguous	5	2	Bra028181 ;Bra028406	C6(Carbamidomethyl)	HCD	1	0	1	1	394	2.80141	0	0	0	50	2	774.908	1548.81	-0.542457	82.5226	46213	46213	MS2	16/26	20130120_Brassica_A6.raw
	High	LPLFGcTDSAQVLK	Unambiguous	5	2	Bra028181 ;Bra028406	C6(Carbamidomethyl)	HCD	1	0	1	1	383	2.78381	0	0	23.4631	50	2	774.91	1548.81	1.97964	91.3359	51155	51155	MS2	15/26	20130120_Brassica_A1.raw
	High	LPLFGCTDSAQVLK	Unambiguous	5	2	Bra028181 ;Bra028406		HCD	1	0	1	1	380	2.78263	0	0	11.2197	12	2	746.396	1491.78	-1.80428	45.7213	25528	25528	MS2	16/26	20130120_Brassica_A6.raw
	High	EHGNTPGYYDGR	Unambiguous	1	1	Bra028406		HCD	1	0	1	1	69	2.75316	0	0	50.2033	50	3	455.865	1365.58	-1.45225	22.1904	12171	12171	MS2	20/44	20130120_Brassica_A4.raw
	High	EVQEcKTEYPNAFIR	Unambiguous	4	3	Bra025431 ;Bra028181 ;Bra028406	C5(Carbamidomethyl)	HCD	1	0	1	1	356	2.73086	0	1	38.6963	30	3	628.636	1883.89	-1.11814	31.7472	17607	17607	MS2	18/56	20130120_Brassica_A2.raw
	High	KFETLSYLPDVTDVELAK	Unambiguous	1	1	Bra028406		HCD	1	0	1	1	301	2.73052	0	1	12.9445	50	3	690.034	2068.09	1.29023	92.0664	51555	51555	MS2	16/68	20130120_Brassica_A6.raw
	High	QVQcISFIAYKPPSFTGA	Unambiguous	3	2	Bra028181 ;Bra028406	C4(Carbamidomethyl)	HCD	1	0	1	1	391	2.72809	0	0	21.5176	50	3	672.009	2014.01	0.552344	86.7525	48586	48586	MS2	16/68	20130120_Brassica_A6.raw
	High	LPLFGCTDSAQVLK	Unambiguous	5	2	Bra028181 ;Bra028406		HCD	1	0	1	1	374	2.71893	0	0	39.4576	19	2	746.405	1491.8	9.48793	39.1955	21836	21836	MS2	15/26	20130120_Brassica_A6.raw
	High	LPLFGcTDSAQVLK	Unambiguous	5	2	Bra028181 ;Bra028406	C6(Carbamidomethyl)	HCD	1	0	1	1	286	2.71275	0	0	0	50	1	1548.81	1548.81	0.530235	40.2625	22448	22448	MS2	11/26	20130120_Brassica_A6.raw
	High	LPLFGcTDSAQVLK	Unambiguous	5	2	Bra028181 ;Bra028406	C6(Carbamidomethyl)	HCD	1	0	1	1	378	2.69817	0	0	16.1196	50	2	774.91	1548.81	2.13727	91.2946	51125	51125	MS2	15/26	20130120_Brassica_A5.raw
	High	EHGNTPGYYDGR	Unambiguous	1	1	Bra028406		HCD	1	0	1	1	87	2.64222	0	0	58.1324	50	3	455.866	1365.58	0.424957	22.128	12144	12144	MS2	20/44	20130120_Brassica_A5.raw
	High	QVQcISFIAYKPPSFTGA	Unambiguous	3	2	Bra028181 ;Bra028406	C4(Carbamidomethyl)	HCD	1	0	1	1	386	2.63677	0	0	2.68488	7	3	672.008	2014.01	-0.811394	44.2609	24717	24717	MS2	16/68	20130120_Brassica_A4.raw
	High	WIPcVEFELEHGFVYR	Unambiguous	4	3	Bra025431 ;Bra028181 ;Bra028406	C4(Carbamidomethyl)	HCD	1	0	1	1	377	2.63481	0	0	79.852	50	3	694.337	2081	0.119227	47.0919	26113	26113	MS2	17/60	20130120_Brassica_A7.raw
	High	EVDYLLR	Unambiguous	6	3	Bra025431 ;Bra028181 ;Bra028406		HCD	1	0	1	2	298	2.62467	0	0	0	50	1	907.487	907.487	-1.93721	31.6675	17557	17557	MS2	12/12	20130120_Brassica_A6.raw
	High	TEYPNAFIR	Unambiguous	4	3	Bra025431 ;Bra028181 ;Bra028406		HCD	1	0	1	1	232	2.59219	0	0	0.448445	1	2	555.784	1110.56	2.0124	32.8063	18213	18213	MS2	12/16	20130120_Brassica_A6.raw
	High	QVQcISFIAYKPPSFTGA	Unambiguous	3	2	Bra028181 ;Bra028406	C4(Carbamidomethyl)	HCD	1	0	1	1	293	2.57943	0	0	0	50	2	1007.51	2014.01	-1.95632	84.6691	47423	47423	MS2	11/34	20130120_Brassica_A6.raw
	High	EVDYLLR	Unambiguous	6	3	Bra025431 ;Bra028181 ;Bra028406		HCD	1	0	1	2	238	2.56522	0	0	6.99466	31	1	907.49	907.49	1.29114	32.0998	17827	17827	MS2	11/12	20130120_Brassica_A4.raw
	High	LPLFGcTDSAQVLK	Unambiguous	5	2	Bra028181 ;Bra028406	C6(Carbamidomethyl)	HCD	1	0	1	1	400	2.5298	0	0	30.6781	35	2	774.91	1548.81	2.68898	39.1936	21964	21964	MS2	14/26	20130120_Brassica_A3.raw
	High	LPLFGcTDSAQVLK	Unambiguous	5	2	Bra028181 ;Bra028406	C6(Carbamidomethyl)	HCD	1	0	1	1	376	2.52882	0	0	20.9221	50	2	774.908	1548.81	-0.30601	88.0076	49290	49290	MS2	18/26	20130120_Brassica_A6.raw
Bra005019	rubisco activase	823.329	47.79	1	6	20	203	475	51.797	7.18115
	Confidence Level	Sequence	PSM Ambiguity	# Proteins	# Protein Groups	Protein Group Accessions	Modifications	Activation Type	ΔScore	ΔCn	Rank	Search Engine Rank	Peptides Matched	XCorr	Probability	# Missed Cleavages	Isolation Interference [%]	Ion Inject Time [ms]	Charge	m/z [Da]	MH+ [Da]	ΔM [ppm]	RT [min]	First Scan	Last Scan	MS Order	Ions Matched	Spectrum File
	High	GmVDSVFQAPmGTGTHNAVLSSYEYISQGLK	Unambiguous	3	3	Bra000144 ;Bra005019 ;Bra017055	M2(Oxidation); M11(Oxidation)	HCD	1	0	1	1	403	6.52793	0	0	0	43	3	1107.19	3319.56	0.342719	45.6205	25603	25603	MS2	34/120	20130120_Brassica_A3.raw
	High	GmVDSVFQAPmGTGTHNAVLSSYEYISQGLK	Unambiguous	3	3	Bra000144 ;Bra005019 ;Bra017055	M2(Oxidation); M11(Oxidation)	HCD	1	0	1	1	408	6.39358	0	0	2.32085	40	3	1107.19	3319.56	-1.09143	91.5336	51375	51375	MS2	35/120	20130120_Brassica_A3.raw
	High	mGINPImmSAGELESGNAGEPAK	Unambiguous	3	3	Bra000144 ;Bra005019 ;Bra017055	M1(Oxidation); M7(Oxidation); M8(Oxidation)	HCD	1	0	1	1	181	5.84896	0	0	0	32	2	1176.53	2352.05	0.431824	34.7768	19388	19388	MS2	24/44	20130120_Brassica_A1.raw
	High	mGINPImmSAGELESGNAGEPAK	Unambiguous	3	3	Bra000144 ;Bra005019 ;Bra017055	M1(Oxidation); M7(Oxidation); M8(Oxidation)	HCD	1	0	1	1	183	5.84045	0	0	0.91798	4	2	1176.53	2352.05	-0.294769	34.3363	19204	19204	MS2	24/44	20130120_Brassica_A3.raw
	High	mGINPImmSAGELESGNAGEPAK	Unambiguous	3	3	Bra000144 ;Bra005019 ;Bra017055	M1(Oxidation); M7(Oxidation); M8(Oxidation)	HCD	1	0	1	1	182	5.79084	0	0	0	21	2	1176.53	2352.05	0.224227	34.5847	19250	19250	MS2	26/44	20130120_Brassica_A5.raw
	High	VPIIVTGNDFSTLYAPLIR	Unambiguous	3	3	Bra000144 ;Bra005019 ;Bra017055		HCD	1	0	1	1	94	5.75755	0	0	2.28233	22	2	1045.09	2089.17	-0.493407	49.2477	27631	27631	MS2	21/36	20130120_Brassica_A3.raw
	High	mGINPImmSAGELESGNAGEPAK	Unambiguous	3	3	Bra000144 ;Bra005019 ;Bra017055	M1(Oxidation); M7(Oxidation); M8(Oxidation)	HCD	1	0	1	1	182	5.75728	0	0	0	50	2	1176.53	2352.05	-0.0871704	34.8722	19414	19414	MS2	27/44	20130120_Brassica_A5.raw
	High	mGINPImmSAGELESGNAGEPAK	Unambiguous	3	3	Bra000144 ;Bra005019 ;Bra017055	M1(Oxidation); M7(Oxidation); M8(Oxidation)	HCD	1	0	1	1	191	5.75344	0	0	0	14	2	1176.53	2352.05	1.36601	34.6043	19357	19357	MS2	23/44	20130120_Brassica_A3.raw
	High	mGINPImmSAGELESGNAGEPAK	Unambiguous	3	3	Bra000144 ;Bra005019 ;Bra017055	M1(Oxidation); M7(Oxidation); M8(Oxidation)	HCD	1	0	1	1	159	5.74057	0	0	0	43	2	1176.53	2352.05	-1.43656	34.0512	18947	18947	MS2	23/44	20130120_Brassica_A5.raw
	High	mGINPImmSAGELESGNAGEPAK	Unambiguous	3	3	Bra000144 ;Bra005019 ;Bra017055	M1(Oxidation); M7(Oxidation); M8(Oxidation)	HCD	1	0	1	1	174	5.71007	0	0	0	50	2	1176.53	2352.05	-0.398568	33.8077	18903	18903	MS2	22/44	20130120_Brassica_A3.raw
	High	mGINPImmSAGELESGNAGEPAK	Unambiguous	3	3	Bra000144 ;Bra005019 ;Bra017055	M1(Oxidation); M7(Oxidation); M8(Oxidation)	HCD	1	0	1	1	189	5.64755	0	0	0	3	2	1176.53	2352.05	0.431824	34.0691	19051	19051	MS2	24/44	20130120_Brassica_A3.raw
	High	mGINPImmSAGELESGNAGEPAK	Unambiguous	3	3	Bra000144 ;Bra005019 ;Bra017055	M1(Oxidation); M7(Oxidation); M8(Oxidation)	HCD	1	0	1	1	192	5.63886	0	0	0	47	2	1176.53	2352.05	1.26221	34.359	19120	19120	MS2	26/44	20130120_Brassica_A4.raw
	High	mGINPImmSAGELESGNAGEPAK	Unambiguous	3	3	Bra000144 ;Bra005019 ;Bra017055	M1(Oxidation); M7(Oxidation); M8(Oxidation)	HCD	1	0	1	1	198	5.58158	0	0	0	17	2	1176.53	2352.06	1.67741	34.7929	19340	19340	MS2	23/44	20130120_Brassica_A2.raw
	High	mGINPImmSAGELESGNAGEPAK	Unambiguous	3	3	Bra000144 ;Bra005019 ;Bra017055	M1(Oxidation); M7(Oxidation); M8(Oxidation)	HCD	1	0	1	1	203	5.57143	0	0	4.05666	22	3	784.688	2352.05	-0.611883	34.72	19324	19324	MS2	33/88	20130120_Brassica_A4.raw
	High	mGINPImmSAGELESGNAGEPAK	Unambiguous	3	3	Bra000144 ;Bra005019 ;Bra017055	M1(Oxidation); M7(Oxidation); M8(Oxidation)	HCD	1	0	1	1	202	5.542	0	0	6.87408	50	2	1176.53	2352.06	2.0926	91.5632	51391	51391	MS2	24/44	20130120_Brassica_A3.raw
	High	LmEYGNmLVmEQENVKR	Unambiguous	3	3	Bra000144 ;Bra005019 ;Bra017055	M2(Oxidation); M7(Oxidation); M10(Oxidation)	HCD	1	0	1	1	292	5.49936	0	1	2.07275	5	3	711.333	2131.98	0.641825	30.311	16808	16808	MS2	28/64	20130120_Brassica_A5.raw
	High	mGINPImmSAGELESGNAGEPAK	Unambiguous	3	3	Bra000144 ;Bra005019 ;Bra017055	M1(Oxidation); M7(Oxidation); M8(Oxidation)	HCD	1	0	1	1	212	5.49838	0	0	11.399	25	3	784.689	2352.05	0.555856	34.4574	19176	19176	MS2	34/88	20130120_Brassica_A4.raw
	High	mGINPImmSAGELESGNAGEPAK	Unambiguous	3	3	Bra000144 ;Bra005019 ;Bra017055	M1(Oxidation); M7(Oxidation); M8(Oxidation)	HCD	1	0	1	1	188	5.4974	0	0	0	10	2	1176.53	2352.05	1.15842	34.6251	19270	19270	MS2	23/44	20130120_Brassica_A4.raw
	High	mGINPImmSAGELESGNAGEPAK	Unambiguous	3	3	Bra000144 ;Bra005019 ;Bra017055	M1(Oxidation); M7(Oxidation); M8(Oxidation)	HCD	1	0	1	1	201	5.45803	0	0	0	19	2	1176.53	2352.06	1.78121	34.2557	19091	19091	MS2	23/44	20130120_Brassica_A1.raw
	High	mGINPImmSAGELESGNAGEPAK	Unambiguous	3	3	Bra000144 ;Bra005019 ;Bra017055	M1(Oxidation); M7(Oxidation); M8(Oxidation)	HCD	1	0	1	1	209	5.45448	0	0	0	26	2	1176.53	2352.06	2.3002	35.1627	19577	19577	MS2	24/44	20130120_Brassica_A4.raw
	High	LmEYGNmLVmEQENVKR	Unambiguous	3	3	Bra000144 ;Bra005019 ;Bra017055	M2(Oxidation); M7(Oxidation); M10(Oxidation)	HCD	1	0	1	1	295	5.40869	0	1	13.496	12	3	711.332	2131.98	-0.646451	29.9997	16622	16622	MS2	27/64	20130120_Brassica_A4.raw
	High	mGINPImmSAGELESGNAGEPAK	Unambiguous	3	3	Bra000144 ;Bra005019 ;Bra017055	M1(Oxidation); M7(Oxidation); M8(Oxidation)	HCD	1	0	1	1	170	5.40698	0	0	0	50	2	1176.53	2352.05	-0.606166	33.9879	18941	18941	MS2	27/44	20130120_Brassica_A1.raw
	High	mGINPImmSAGELESGNAGEPAK	Unambiguous	3	3	Bra000144 ;Bra005019 ;Bra017055	M1(Oxidation); M7(Oxidation); M8(Oxidation)	HCD	1	0	1	1	182	5.35548	0	0	1.55414	11	2	1176.53	2352.05	0.431824	34.8942	19424	19424	MS2	23/44	20130120_Brassica_A4.raw
	High	VPIIVTGNDFSTLYAPLIR	Unambiguous	3	3	Bra000144 ;Bra005019 ;Bra017055		HCD	1	0	1	1	84	5.3266	0	0	0	18	2	1045.09	2089.17	0.207754	49.6195	27749	27749	MS2	23/36	20130120_Brassica_A1.raw
[truncated: 26,362 more rows]

## Sheet: B.rapa_0hr drought treatment 2
Accession	Description	Score	Coverage	# Proteins	# Unique Peptides	# Peptides	# PSMs	# AAs	MW [kDa]	calc. pI
Bra028087	ribulose-bisphosphate carboxylases	3867.68	61.8	1	34	34	1032	479	52.9225	6.29053
	Confidence Level	Sequence	PSM Ambiguity	# Proteins	# Protein Groups	Protein Group Accessions	Modifications	Activation Type	ΔScore	ΔCn	Rank	Search Engine Rank	Peptides Matched	XCorr	Probability	# Missed Cleavages	Isolation Interference [%]	Ion Inject Time [ms]	Charge	m/z [Da]	MH+ [Da]	ΔM [ppm]	RT [min]	First Scan	Last Scan	MS Order	Ions Matched	Spectrum File
	High	VTPQPGVPPEEAGAAVAAESSTGTWTTVWTDGLTSLDR	Unambiguous	1	1	Bra028087		HCD	1	0	1	1	430	8.06031	0	0	41.458	50	3	1285.63	3854.87	-0.306521	53.4211	29936	29936	MS2	34/148	20130120_Brassica_B3.raw
	High	VTPQPGVPPEEAGAAVAAESSTGTWTTVWTDGLTSLDR	Unambiguous	1	1	Bra028087		HCD	1	0	1	1	420	7.98686	0	0	0	31	3	1285.63	3854.87	-0.555937	57.8978	32425	32425	MS2	35/148	20130120_Brassica_B3.raw
	High	VTPQPGVPPEEAGAAVAAESSTGTWTTVWTDGLTSLDR	Unambiguous	1	1	Bra028087		HCD	1	0	1	1	431	7.82501	0	0	0	12	3	1285.63	3854.87	-0.460938	52.2927	29311	29311	MS2	34/148	20130120_Brassica_B3.raw
	High	VTPQPGVPPEEAGAAVAAESSTGTWTTVWTDGLTSLDR	Unambiguous	1	1	Bra028087		HCD	1	0	1	1	433	7.66453	0	0	0.51996	46	3	1285.63	3854.87	-0.0809394	62.1954	34828	34828	MS2	36/148	20130120_Brassica_B3.raw
	High	VTPQPGVPPEEAGAAVAAESSTGTWTTVWTDGLTSLDR	Unambiguous	1	1	Bra028087		HCD	1	0	1	1	425	7.66431	0	0	0	50	3	1285.63	3854.87	-0.555937	54.4937	30531	30531	MS2	34/148	20130120_Brassica_B3.raw
	High	VTPQPGVPPEEAGAAVAAESSTGTWTTVWTDGLTSLDR	Unambiguous	1	1	Bra028087		HCD	1	0	1	1	451	7.47428	0	0	1.19021	50	3	1285.63	3854.88	0.964054	57.3817	32137	32137	MS2	36/148	20130120_Brassica_B3.raw
	High	VTPQPGVPPEEAGAAVAAESSTGTWTTVWTDGLTSLDR	Unambiguous	1	1	Bra028087		HCD	1	0	1	1	437	7.46381	0	0	0	50	3	1285.63	3854.87	0.0140601	57.6409	32282	32282	MS2	36/148	20130120_Brassica_B3.raw
	High	VTPQPGVPPEEAGAAVAAESSTGTWTTVWTDGLTSLDR	Unambiguous	1	1	Bra028087		HCD	1	0	1	1	424	7.3141	0	0	0.355641	36	3	1285.63	3854.87	-1.22093	56.3456	31561	31561	MS2	38/148	20130120_Brassica_B3.raw
	High	VTPQPGVPPEEAGAAVAAESSTGTWTTVWTDGLTSLDR	Unambiguous	1	1	Bra028087		HCD	1	0	1	1	358	7.298	0	0	10.0753	50	2	1927.95	3854.88	3.23169	52.599	29482	29482	MS2	31/74	20130120_Brassica_B3.raw
	High	ELGVPIVmHDYLTGGFTANTSLAHYcR	Unambiguous	1	1	Bra028087	M8(Oxidation); C26(Carbamidomethyl)	HCD	1	0	1	1	388	7.22892	0	0	0	50	3	1013.49	3038.45	0.517348	41.3086	23051	23051	MS2	40/104	20130120_Brassica_B2.raw
	High	ELGVPIVmHDYLTGGFTANTSLAHYcR	Unambiguous	1	1	Bra028087	M8(Oxidation); C26(Carbamidomethyl)	HCD	1	0	1	1	419	7.22226	0	0	0	50	3	1013.49	3038.47	5.27808	91.4759	51290	51290	MS2	35/104	20130120_Brassica_B3.raw
	High	VTPQPGVPPEEAGAAVAAESSTGTWTTVWTDGLTSLDR	Unambiguous	1	1	Bra028087		HCD	1	0	1	1	424	7.20046	0	0	1.02675	16	3	1285.63	3854.87	-1.22093	52.6155	29407	29407	MS2	35/148	20130120_Brassica_B4.raw
	High	VTPQPGVPPEEAGAAVAAESSTGTWTTVWTDGLTSLDR	Unambiguous	1	1	Bra028087		HCD	1	0	1	1	425	7.18835	0	0	0	21	3	1285.63	3854.87	-0.555937	62.7756	35155	35155	MS2	34/148	20130120_Brassica_B3.raw
	High	VTPQPGVPPEEAGAAVAAESSTGTWTTVWTDGLTSLDR	Unambiguous	1	1	Bra028087		HCD	1	0	1	1	420	7.18469	0	0	1.30045	50	3	1285.63	3854.87	-0.650937	67.2481	37672	37672	MS2	37/148	20130120_Brassica_B3.raw
	High	VTPQPGVPPEEAGAAVAAESSTGTWTTVWTDGLTSLDR	Unambiguous	1	1	Bra028087		HCD	1	0	1	1	443	7.18336	0	0	0	36	3	1285.63	3854.88	1.34405	91.9882	51577	51577	MS2	38/148	20130120_Brassica_B3.raw
	High	VTPQPGVPPEEAGAAVAAESSTGTWTTVWTDGLTSLDR	Unambiguous	1	1	Bra028087		HCD	1	0	1	1	429	7.15878	0	0	0	23	3	1285.63	3854.87	-0.460938	55.035	30832	30832	MS2	37/148	20130120_Brassica_B3.raw
	High	VTPQPGVPPEEAGAAVAAESSTGTWTTVWTDGLTSLDR	Unambiguous	1	1	Bra028087		HCD	1	0	1	1	443	7.15033	0	0	2.95489	32	3	1285.63	3854.88	1.15405	56.0705	31408	31408	MS2	34/148	20130120_Brassica_B3.raw
	High	VTPQPGVPPEEAGAAVAAESSTGTWTTVWTDGLTSLDR	Unambiguous	1	1	Bra028087		HCD	1	0	1	1	444	7.1287	0	0	0.789641	37	3	1285.63	3854.88	0.964054	68.5662	38412	38412	MS2	35/148	20130120_Brassica_B3.raw
	High	SQAETGEIKGHYLNATAGTcEEmmKR	Unambiguous	1	1	Bra028087	C20(Carbamidomethyl); M23(Oxidation); M24(Oxidation)	HCD	1	0	1	1	249	7.11353	0	2	0	21	3	982.11	2944.32	-2.50315	25.6437	14172	14172	MS2	37/100	20130120_Brassica_B3.raw
	High	VTPQPGVPPEEAGAAVAAESSTGTWTTVWTDGLTSLDR	Unambiguous	1	1	Bra028087		HCD	1	0	1	1	428	7.09539	0	0	0.337842	50	3	1285.63	3854.88	1.72405	71.0066	39787	39787	MS2	37/148	20130120_Brassica_B3.raw
	High	VTPQPGVPPEEAGAAVAAESSTGTWTTVWTDGLTSLDR	Unambiguous	1	1	Bra028087		HCD	1	0	1	1	439	6.99563	0	0	0	28	3	1285.63	3854.87	0.489057	52.8741	29551	29551	MS2	39/148	20130120_Brassica_B4.raw
	High	VTPQPGVPPEEAGAAVAAESSTGTWTTVWTDGLTSLDR	Unambiguous	1	1	Bra028087		HCD	1	0	1	1	420	6.94226	0	0	2.05635	11	3	1285.63	3854.87	-0.555937	60.0142	33604	33604	MS2	38/148	20130120_Brassica_B3.raw
	High	VTPQPGVPPEEAGAAVAAESSTGTWTTVWTDGLTSLDR	Unambiguous	1	1	Bra028087		HCD	1	0	1	1	434	6.93774	0	0	0	29	3	1285.63	3854.87	0.0140601	53.6771	30077	30077	MS2	34/148	20130120_Brassica_B3.raw
	High	ELGVPIVmHDYLTGGFTANTSLAHYcR	Unambiguous	1	1	Bra028087	M8(Oxidation); C26(Carbamidomethyl)	HCD	1	0	1	1	394	6.91776	0	0	17.5643	49	3	1013.49	3038.44	-2.01369	40.9488	22967	22967	MS2	35/104	20130120_Brassica_B3.raw
	High	VTPQPGVPPEEAGAAVAAESSTGTWTTVWTDGLTSLDR	Unambiguous	1	1	Bra028087		HCD	1	0	1	1	449	6.91503	0	0	0	50	3	1285.63	3854.88	0.964054	78.0614	43756	43756	MS2	35/148	20130120_Brassica_B3.raw
	High	VTPQPGVPPEEAGAAVAAESSTGTWTTVWTDGLTSLDR	Unambiguous	1	1	Bra028087		HCD	1	0	1	1	431	6.91382	0	0	2.95623	29	3	1285.63	3854.89	4.19402	56.8634	31849	31849	MS2	36/148	20130120_Brassica_B3.raw
	High	VTPQPGVPPEEAGAAVAAESSTGTWTTVWTDGLTSLDR	Unambiguous	1	1	Bra028087		HCD	1	0	1	1	355	6.91262	0	0	84.2838	12	2	1927.94	3854.87	0.00171504	52.431	29305	29305	MS2	32/74	20130120_Brassica_B4.raw
	High	LSGGDHVHAGTVVGKLEGDR	Unambiguous	1	1	Bra028087		HCD	1	0	1	1	394	6.90356	0	1	6.32433	16	3	668.68	2004.03	-0.202853	26.5209	14686	14686	MS2	39/76	20130120_Brassica_B3.raw
	High	ELGVPIVmHDYLTGGFTANTSLAHYcR	Unambiguous	1	1	Bra028087	M8(Oxidation); C26(Carbamidomethyl)	HCD	1	0	1	1	391	6.89785	0	0	15.2798	32	3	1013.49	3038.45	0.577611	40.4085	22662	22662	MS2	37/104	20130120_Brassica_B3.raw
	High	VTPQPGVPPEEAGAAVAAESSTGTWTTVWTDGLTSLDR	Unambiguous	1	1	Bra028087		HCD	1	0	1	1	419	6.86528	0	0	0.428937	10	3	1285.63	3854.87	-1.60093	52.5694	29466	29466	MS2	38/148	20130120_Brassica_B3.raw
	High	SQAETGEIKGHYLNATAGTcEEmmKR	Unambiguous	1	1	Bra028087	C20(Carbamidomethyl); M23(Oxidation); M24(Oxidation)	HCD	1	0	1	1	220	6.83826	0	2	7.72377	9	4	736.831	2944.3	-6.84028	25.6005	14147	14147	MS2	42/150	20130120_Brassica_B3.raw
	High	VTPQPGVPPEEAGAAVAAESSTGTWTTVWTDGLTSLDR	Unambiguous	1	1	Bra028087		HCD	1	0	1	1	344	6.83594	0	0	82.1566	50	2	1927.94	3854.87	-0.31495	52.3855	29362	29362	MS2	32/74	20130120_Brassica_B3.raw
	High	VTPQPGVPPEEAGAAVAAESSTGTWTTVWTDGLTSLDR	Unambiguous	1	1	Bra028087		HCD	1	0	1	1	363	6.77488	0	0	10.2824	40	2	1927.94	3854.87	-0.568282	52.8751	29635	29635	MS2	29/74	20130120_Brassica_B3.raw
	High	VTPQPGVPPEEAGAAVAAESSTGTWTTVWTDGLTSLDR	Unambiguous	1	1	Bra028087		HCD	1	0	1	1	429	6.77233	0	0	0	50	3	1285.63	3854.87	-0.270938	74.0946	41525	41525	MS2	36/148	20130120_Brassica_B3.raw
	High	VTPQPGVPPEEAGAAVAAESSTGTWTTVWTDGLTSLDR	Unambiguous	1	1	Bra028087		HCD	1	0	1	1	422	6.76858	0	0	3.18597	50	3	1285.63	3854.87	-1.50593	61.6529	34523	34523	MS2	35/148	20130120_Brassica_B3.raw
	High	VTPQPGVPPEEAGAAVAAESSTGTWTTVWTDGLTSLDR	Unambiguous	1	1	Bra028087		HCD	1	0	1	1	338	6.76656	0	0	11.6415	50	2	1927.94	3854.87	-1.64495	52.5351	29362	29362	MS2	30/74	20130120_Brassica_B4.raw
	High	VTPQPGVPPEEAGAAVAAESSTGTWTTVWTDGLTSLDR	Unambiguous	1	1	Bra028087		HCD	1	0	1	1	425	6.64314	0	0	1.03927	50	3	1285.63	3854.87	-0.270938	70.1769	39321	39321	MS2	36/148	20130120_Brassica_B3.raw
	High	VTPQPGVPPEEAGAAVAAESSTGTWTTVWTDGLTSLDR	Unambiguous	1	1	Bra028087		HCD	1	0	1	1	443	6.6372	0	0	0	50	3	1285.63	3854.88	1.53405	73.4839	41182	41182	MS2	33/148	20130120_Brassica_B3.raw
	High	GHYLNATAGTcEEmMKR	Unambiguous	1	1	Bra028087	C11(Carbamidomethyl); M14(Oxidation)	HCD	0.0408	0	1	1	168	6.61482	0	1	17.4665	21	3	662.295	1984.87	1.75049	25.0759	13839	13839	MS2	30/64	20130120_Brassica_B3.raw
	High	VTPQPGVPPEEAGAAVAAESSTGTWTTVWTDGLTSLDR	Unambiguous	1	1	Bra028087		HCD	1	0	1	1	451	6.60547	0	0	0	50	3	1285.63	3854.88	0.964054	75.4187	42271	42271	MS2	34/148	20130120_Brassica_B3.raw
	High	VTPQPGVPPEEAGAAVAAESSTGTWTTVWTDGLTSLDR	Unambiguous	1	1	Bra028087		HCD	1	0	1	1	448	6.59562	0	0	0	35	3	1285.63	3854.88	0.774056	70.4454	39472	39472	MS2	35/148	20130120_Brassica_B3.raw
	High	VTPQPGVPPEEAGAAVAAESSTGTWTTVWTDGLTSLDR	Unambiguous	1	1	Bra028087		HCD	1	0	1	1	444	6.58026	0	0	0.221155	40	3	1285.63	3854.88	1.15405	71.3316	39970	39970	MS2	38/148	20130120_Brassica_B3.raw
	High	VTPQPGVPPEEAGAAVAAESSTGTWTTVWTDGLTSLDR	Unambiguous	1	1	Bra028087		HCD	1	0	1	1	438	6.56812	0	0	1.07116	10	3	1285.63	3854.87	0.299059	54.7662	30683	30683	MS2	40/148	20130120_Brassica_B3.raw
	High	VTPQPGVPPEEAGAAVAAESSTGTWTTVWTDGLTSLDR	Unambiguous	1	1	Bra028087		HCD	1	0	1	1	420	6.518	0	0	0	29	3	1285.63	3854.87	-0.745936	52.8399	29615	29615	MS2	36/148	20130120_Brassica_B3.raw
	High	VTPQPGVPPEEAGAAVAAESSTGTWTTVWTDGLTSLDR	Unambiguous	1	1	Bra028087		HCD	1	0	1	1	437	6.48384	0	0	1.06873	13	3	1285.63	3854.87	0.394058	53.936	30221	30221	MS2	36/148	20130120_Brassica_B3.raw
	High	VTPQPGVPPEEAGAAVAAESSTGTWTTVWTDGLTSLDR	Unambiguous	1	1	Bra028087		HCD	1	0	1	1	421	6.45609	0	0	0	50	3	1285.63	3854.86	-2.36093	57.5058	32134	32134	MS2	37/148	20130120_Brassica_B4.raw
	High	VTPQPGVPPEEAGAAVAAESSTGTWTTVWTDGLTSLDR	Unambiguous	1	1	Bra028087		HCD	1	0	1	1	442	6.45384	0	0	0.156052	29	3	1285.63	3854.87	0.489057	66.993	37528	37528	MS2	34/148	20130120_Brassica_B3.raw
	High	VTPQPGVPPEEAGAAVAAESSTGTWTTVWTDGLTSLDR	Unambiguous	1	1	Bra028087		HCD	1	0	1	1	434	6.44178	0	0	0.360658	36	3	1285.63	3854.87	0.10906	59.743	33454	33454	MS2	37/148	20130120_Brassica_B3.raw
	High	VTPQPGVPPEEAGAAVAAESSTGTWTTVWTDGLTSLDR	Unambiguous	1	1	Bra028087		HCD	1	0	1	1	422	6.43796	0	0	0	7	3	1285.63	3854.87	-0.650937	52.5753	29362	29362	MS2	35/148	20130120_Brassica_B1.raw
	High	VTPQPGVPPEEAGAAVAAESSTGTWTTVWTDGLTSLDR	Unambiguous	1	1	Bra028087		HCD	1	0	1	1	439	6.41582	0	0	0.218299	23	3	1285.63	3854.87	0.584057	62.4541	34974	34974	MS2	36/148	20130120_Brassica_B3.raw
	High	VTPQPGVPPEEAGAAVAAESSTGTWTTVWTDGLTSLDR	Unambiguous	1	1	Bra028087		HCD	1	0	1	1	437	6.40539	0	0	0.216662	10	3	1285.63	3854.87	0.204059	64.6098	36187	36187	MS2	35/148	20130120_Brassica_B3.raw
	High	VTPQPGVPPEEAGAAVAAESSTGTWTTVWTDGLTSLDR	Unambiguous	1	1	Bra028087		HCD	1	0	1	1	448	6.38666	0	0	0	28	3	1285.63	3854.88	0.869055	71.8909	40285	40285	MS2	39/148	20130120_Brassica_B3.raw
	High	VTPQPGVPPEEAGAAVAAESSTGTWTTVWTDGLTSLDR	Unambiguous	1	1	Bra028087		HCD	1	0	1	1	446	6.36762	0	0	0	42	3	1285.63	3854.88	1.05905	92.2484	51722	51722	MS2	37/148	20130120_Brassica_B3.raw
	High	GHYLNATAGTcEEMmKR	Unambiguous	1	1	Bra028087	C11(Carbamidomethyl); M15(Oxidation)	HCD		0.0408	2	2	168	6.33557	0	1	17.4665	21	3	662.295	1984.87	1.75049	25.0759	13839	13839	MS2	29/64	20130120_Brassica_B3.raw
	High	ELGVPIVmHDYLTGGFTANTSLAHYcR	Unambiguous	1	1	Bra028087	M8(Oxidation); C26(Carbamidomethyl)	HCD	1	0	1	1	403	6.26514	0	0	0	50	3	1013.49	3038.46	3.1689	91.5171	51220	51220	MS2	36/104	20130120_Brassica_B2.raw
	High	VTPQPGVPPEEAGAAVAAESSTGTWTTVWTDGLTSLDR	Unambiguous	1	1	Bra028087		HCD	1	0	1	1	434	6.25754	0	0	0.61657	16	3	1285.63	3854.87	0.0140601	61.3815	34371	34371	MS2	38/148	20130120_Brassica_B3.raw
	High	VTPQPGVPPEEAGAAVAAESSTGTWTTVWTDGLTSLDR	Unambiguous	1	1	Bra028087		HCD	1	0	1	1	432	6.25614	0	0	0	38	3	1285.64	3854.9	6.47398	91.7189	51427	51427	MS2	35/148	20130120_Brassica_B3.raw
	High	VTPQPGVPPEEAGAAVAAESSTGTWTTVWTDGLTSLDR	Unambiguous	1	1	Bra028087		HCD	1	0	1	1	428	6.25357	0	0	1.00004	43	3	1285.63	3854.87	-0.270938	59.2093	33155	33155	MS2	37/148	20130120_Brassica_B3.raw
	High	VTPQPGVPPEEAGAAVAAESSTGTWTTVWTDGLTSLDR	Unambiguous	1	1	Bra028087		HCD	1	0	1	1	425	6.25147	0	0	0	39	3	1285.63	3854.86	-1.98093	64.3539	36043	36043	MS2	36/148	20130120_Brassica_B3.raw
	High	VTPQPGVPPEEAGAAVAAESSTGTWTTVWTDGLTSLDR	Unambiguous	1	1	Bra028087		HCD	1	0	1	1	425	6.23117	0	0	0	37	3	1285.63	3854.87	-1.31593	75.6744	42415	42415	MS2	36/148	20130120_Brassica_B3.raw
	High	ELGVPIVmHDYLTGGFTANTSLAHYcR	Unambiguous	1	1	Bra028087	M8(Oxidation); C26(Carbamidomethyl)	HCD	1	0	1	1	323	6.21271	0	0	0	50	2	1519.73	3038.45	0.72265	40.5177	22723	22723	MS2	27/52	20130120_Brassica_B3.raw
	High	VTPQPGVPPEEAGAAVAAESSTGTWTTVWTDGLTSLDR	Unambiguous	1	1	Bra028087		HCD	1	0	1	1	418	6.18904	0	0	0	27	3	1285.63	3854.87	-1.12594	65.4181	36643	36643	MS2	37/148	20130120_Brassica_B3.raw
	High	VTPQPGVPPEEAGAAVAAESSTGTWTTVWTDGLTSLDR	Unambiguous	1	1	Bra028087		HCD	1	0	1	1	422	6.1503	0	0	0	50	3	1285.63	3854.87	-1.12594	76.7331	43009	43009	MS2	33/148	20130120_Brassica_B3.raw
	High	VTPQPGVPPEEAGAAVAAESSTGTWTTVWTDGLTSLDR	Unambiguous	1	1	Bra028087		HCD	1	0	1	1	437	6.13959	0	0	0.591178	26	3	1285.63	3854.88	2.10404	65.9366	36934	36934	MS2	34/148	20130120_Brassica_B3.raw
	High	VTPQPGVPPEEAGAAVAAESSTGTWTTVWTDGLTSLDR	Unambiguous	1	1	Bra028087		HCD	1	0	1	1	435	6.13413	0	0	0	50	3	1285.63	3854.87	0.10906	69.1235	38725	38725	MS2	39/148	20130120_Brassica_B3.raw
[truncated: 30,426 more rows]

## Sheet: B.rapa_0hr drought treatment 3
Accession	Description	Score	Coverage	# Proteins	# Unique Peptides	# Peptides	# PSMs	# AAs	MW [kDa]	calc. pI
[truncated: 28,962 more rows]

[truncated: 6 more sheets: B.rapa_24hr drought treatment 1, B.rapa_24hr drought treatment 2, B.rapa_24hr drought treatment 3, B.rapa_48hr drought treatment 1, B.rapa_48hr drought treatment 2, B.rapa_48hr drought treatment 3]
