# Supplementary material for: Shotgun Quantitative Proteomic Analysis of Proteins Responding to Drought Stress in Brassica rapa L. (Inbred Line “Chiifu”)
Source: Int J Genomics. 2016 Jun 21;2016:4235808. doi: 10.1155/2016/4235808 (PMC4932182; doi:10.1155/2016/4235808)
Supplement: Supplementary file 1 — Supplementary table 1. List of total 3,009 identified non-redundant proteins. Supplementary table 2. List of identified non-redundant proteins from each sample. Supplementary table 3. Relative expression amount of the 1,567 proteins among the treatments and replications. Supplementary table 4. Relative amount of 440 differentially expressed proteins. Supplementary table 5. Average of relative amount of proteins in each groups. Supplementary table 6. Enriched GO terms of proteins in each groups. [file 4235808.f1.zip › sup.table S3.xlsx]

## Sheet: Sheet1
	Supplementary table 3. relative expression amount of the 1,567 proteins among the treatments and repliactions
Accession	Description	0hr 1	0hr 2	0hr 3	24hr 1	24hr 2	24hr 3	48hr 1	48hr 2	48hr 3
Bra016644	heat shock protein 70B	2.38951e-06	2.20662e-06	2.22843e-06	1.73327e-06	1.66015e-06	1.8615e-06	0.000992392	0.00109458	0.00117305
Bra012203	ferredoxin-NADP(+)-oxidoreductase 2	4.23209e-06	3.90818e-06	3.94681e-06	0.00199539	0.00211703	0.00217598	2.9294e-06	3.46185e-06	3.52138e-06
Bra024101	H(+)-ATPase 2	0.000686488	0.000744886	0.000688227	1.24489e-06	1.19237e-06	1.33699e-06	1.18795e-06	1.40387e-06	1.42801e-06
Bra027756	P-loop containing nucleoside triphosphate hydrolases superfamily protein	1.86905e-06	1.72599e-06	1.74305e-06	1.35575e-06	1.29855e-06	1.45605e-06	0.000181122	0.000152888	0.000171069
Bra016481	ferredoxin-NADP(+)-oxidoreductase 2	0.00209082	0.00224602	0.00171111	3.09513e-06	2.96455e-06	3.32411e-06	0.00197888	0.00209423	0.00213024
Bra017233	ENTH/VHS family protein	1.17398e-06	1.08413e-06	1.09484e-06	8.5157e-07	8.15642e-07	9.14569e-07	0.000195028	0.00021127	0.000244208
Bra019953	acetyl Co-enzyme a carboxylase biotin carboxylase subunit	3.10016e-06	2.86288e-06	2.89117e-06	0.000787065	0.000818475	0.000941896	2.14589e-06	2.53593e-06	2.57954e-06
Bra003256	dicarboxylate diiron protein, putative (Crd1)	3.7975e-06	3.50685e-06	3.54151e-06	2.75459e-06	2.63837e-06	2.95837e-06	0.000262858	0.000279572	0.000315977
Bra017018	Eukaryotic translation initiation factor 2 subunit 1	7.24093e-05	6.68672e-05	6.75281e-05	2.62617e-06	2.51537e-06	2.82045e-06	2.50604e-06	2.96154e-06	3.01246e-06
Bra006391	PHYTOENE SYNTHASE	7.50328e-05	6.92899e-05	6.99748e-05	2.72132e-06	2.60651e-06	2.92264e-06	2.59684e-06	3.06884e-06	3.12161e-06
Bra004054	UDP-Glycosyltransferase / trehalose-phosphatase family protein	1.79974e-06	1.66199e-06	1.67842e-06	1.30548e-06	1.2504e-06	1.40206e-06	2.49152e-05	2.94438e-05	2.99501e-05
Bra000115	hydroxyproline-rich glycoprotein family protein	4.76435e-06	4.3997e-06	4.44319e-06	3.45591e-06	3.31011e-06	3.71158e-06	6.59565e-05	7.79448e-05	7.92851e-05
Bra002840	LORELEI-LIKE-GPI-ANCHORED PROTEIN 1	2.01712e-05	1.86273e-05	1.88114e-05	1.46315e-05	1.40142e-05	1.5714e-05	0.000279244	0.00033	0.000335675
Bra014904	HISTIDINE TRIAD NUCLEOTIDE-BINDING 2	8.48732e-06	7.83771e-06	7.91518e-06	6.15644e-06	5.89669e-06	6.61188e-06	0.000117496	0.000138852	0.00014124
Bra000035	vacuoleless1 (VCL1)	1.89412e-06	1.74915e-06	1.76644e-06	1.37394e-06	1.31597e-06	1.47558e-06	2.62217e-05	3.09878e-05	3.15207e-05
Bra011869	cold, circadian rhythm, and RNA binding 1	0.000671127	0.000885371	0.000625886	6.95449e-06	6.66108e-06	7.46898e-06	6.63636e-06	7.84259e-06	7.97745e-06
Bra028547	P-loop containing nucleoside triphosphate hydrolases superfamily protein	3.1633e-06	2.92118e-06	2.95006e-06	2.29456e-06	2.19775e-06	2.46431e-06	6.56878e-05	5.17515e-05	5.26414e-05
Bra019384	Uncharacterised protein family (UPF0041)	1.43813e-05	1.32806e-05	1.34118e-05	1.04317e-05	9.99162e-06	1.12035e-05	0.000497727	0.000470555	0.000358985
Bra022867	ACT domain-containing small subunit of acetolactate synthase protein	3.32586e-06	3.07131e-06	3.10167e-06	9.64992e-05	6.93209e-05	7.77285e-05	2.30212e-06	2.72056e-06	2.76734e-06
Bra033604	Glucose-1-phosphate adenylyltransferase family protein	2.96975e-06	2.74245e-06	2.76956e-06	2.15416e-06	2.06328e-06	2.31353e-06	0.000143894	0.000145755	0.000222392
Bra005640	ACT domain-containing small subunit of acetolactate synthase protein	0.000139926	9.69123e-05	9.78702e-05	2.53745e-06	2.43039e-06	2.72517e-06	2.42138e-06	2.86149e-06	2.91069e-06
Bra006067	Zincin-like metalloproteases family protein	2.23479e-06	2.06374e-06	2.08414e-06	1.62105e-06	1.55265e-06	1.74097e-06	0.000154689	0.000274209	0.000185949
Bra004323	Ribosomal protein PSRP-3/Ycf65	9.24511e-06	8.53751e-06	8.6219e-06	0.000268245	0.000321159	0.000216067	6.39935e-06	7.5625e-06	7.69254e-06
Bra015607	Serine protease inhibitor (SERPIN) family protein	3.96219e-06	3.65893e-06	3.6951e-06	2.87405e-06	2.75279e-06	3.08667e-06	8.22774e-05	9.72321e-05	6.59361e-05
Bra013385	RNAse l inhibitor protein 2	0.000213863	0.000172807	0.000124654	1.93912e-06	1.85731e-06	2.08257e-06	1.85042e-06	2.18675e-06	2.22435e-06
Bra000998	glucuronokinase G	8.62877e-05	7.96834e-05	8.0471e-05	3.12952e-06	2.99749e-06	3.36104e-06	8.95909e-05	7.05833e-05	0.000107696
Bra003601	Protein kinase superfamily protein	1.34591e-06	1.2429e-06	1.25518e-06	9.7628e-07	9.35091e-07	1.0485e-06	2.79486e-05	4.40381e-05	3.35965e-05
Bra022325	Eukaryotic aspartyl protease family protein	3.1633e-06	2.92118e-06	2.95006e-06	0.000229456	0.00026373	0.000197144	0.000306543	0.00018113	0.000263207
Bra039315	signal recognition particle receptor protein, chloroplast (FTSY)	9.86145e-05	0.0001366	9.19669e-05	3.5766e-06	3.4257e-06	3.84119e-06	3.41299e-06	4.03333e-06	4.10269e-06
Bra017684	subtilisin-like serine protease 2	2.025e-06	1.87002e-06	1.8885e-06	1.46888e-06	1.4069e-06	1.57754e-06	5.60673e-05	8.28227e-05	5.05481e-05
Bra009706	ribosomal protein S11-beta	9.76842e-06	9.02077e-06	9.10993e-06	0.000354285	0.00027147	0.000456594	6.76158e-06	7.99056e-06	8.12797e-06
Bra033545	Papain family cysteine protease	4.22059e-06	3.89756e-06	3.93608e-06	3.06149e-06	2.93232e-06	3.28797e-06	0.000204501	0.000138098	0.000245827
Bra024444	voltage dependent anion channel 2	5.62746e-06	5.19675e-06	5.24811e-06	4.08198e-06	3.90976e-06	4.38396e-06	0.000272668	0.000506359	0.000468242
Bra024809	ssDNA-binding transcriptional regulator	5.95088e-06	5.49541e-06	5.54973e-06	0.000215829	0.000165379	0.000139078	0.000164765	0.000194713	0.000148546
Bra007284	dicarboxylate diiron protein, putative (Crd1)	0.000389686	0.000479814	0.000294195	0.000215365	0.000219171	0.000390314	1.28446e-06	1.51792e-06	1.54402e-06
Bra024300	Phosphoglycerate mutase family protein	0.000159029	0.000146857	9.88723e-05	3.84515e-06	3.68292e-06	4.12961e-06	3.66925e-06	4.33618e-06	4.41074e-06
Bra022262	unknown protein;	0.000247848	0.000228878	0.000154093	5.9927e-06	5.73987e-06	6.43603e-06	5.71857e-06	6.75798e-06	6.87419e-06
Bra012095	Protein phosphatase 2C family protein	0.000113925	0.000105205	7.08302e-05	2.75459e-06	2.63837e-06	2.95837e-06	2.62858e-06	3.10636e-06	3.15977e-06
Bra039029	NADP-malic enzyme 1	2.66869e-06	2.46444e-06	2.48879e-06	1.93579e-06	1.85411e-06	2.07899e-06	0.000258613	0.000130979	0.000155437
Bra028015	unknown protein;	0.000225098	0.000311805	0.000314887	0.000326559	0.000234586	0.000350717	7.79052e-06	9.20652e-06	9.36483e-06
Bra009660	lysm domain GPI-anchored protein 2 precursor	4.29055e-06	3.96216e-06	4.00132e-06	6.22446e-05	8.94278e-05	0.000100274	2.96986e-06	3.50967e-06	3.57002e-06
Bra012557	|	2.58432e-06	2.38653e-06	2.41011e-06	3.74918e-05	5.3865e-05	6.03981e-05	1.78884e-06	2.11398e-06	2.15033e-06
Bra017819	cytochrome P450, family 81, subfamily D, polypeptide 8	3.11883e-06	2.88012e-06	2.90859e-06	2.2623e-06	2.16686e-06	2.42967e-06	0.000345411	0.000204096	0.000155704
Bra006196	Auxin-responsive GH3 family protein	5.11756e-05	7.08881e-05	9.54516e-05	1.85606e-06	1.77775e-06	1.99337e-06	1.77116e-06	2.09308e-06	2.12907e-06
Bra004940	Remorin family protein	0.000404474	0.000373516	0.00045265	0.000528107	0.000281014	0.000567175	5.59943e-06	6.61719e-06	6.73097e-06
Bra021273	B-cell receptor-associated 31-like	1.20401e-05	1.11186e-05	1.12285e-05	8.73355e-06	8.36508e-06	9.37965e-06	0.000166681	0.000295465	0.000200364
Bra021322	lipoxygenase 1	1.81234e-06	1.67363e-06	1.69017e-06	3.94385e-05	6.29577e-05	5.64749e-05	0.000100359	8.89498e-05	6.03196e-05
Bra031031	methylthioalkylmalate synthase-like 4	0.000322031	0.000343134	0.00013861	1.79685e-06	1.72104e-06	1.92978e-06	1.71466e-06	2.02632e-06	2.06116e-06
Bra000913	tolB protein-related	2.38951e-06	2.20662e-06	2.22843e-06	1.73327e-06	1.66015e-06	1.8615e-06	4.96196e-05	3.90923e-05	7.95291e-05
Bra009023	Glycosyl hydrolase family protein	1.96108e-06	1.81099e-06	1.82889e-06	7.11255e-05	5.44997e-05	6.11098e-05	5.42975e-05	3.20833e-05	6.52701e-05
Bra026341	early nodulin-like protein 2	4.7353e-06	4.37287e-06	4.41609e-06	0.000240439	0.000230295	0.000110668	0.000294995	0.000271143	0.000394008
Bra019494	LOCATED IN: thylakoid, chloroplast thylakoid membrane, chloroplast, chloroplast envelope; EXPRESSED IN: 22 plant structures; EXPRESSED DURING: 13 growth stages; CONTAINS InterPro DOMAIN/s: Thylakoid soluble phosphoprotein TSP9 (InterPro:IPR021584); Has 37 Blast hits to 37 proteins in 10 species: Archae - 0; Bacteria - 0; Metazoa - 0; Fungi - 0; Plants - 37; Viruses - 0; Other Eukaryotes - 0 (sour…	0.000301588	0.000696263	0.000562516	0.00120319	0.0015715	0.000939786	1.04378e-05	1.23349e-05	1.25471e-05
Bra029121	CAP160 protein	2.35687e-06	2.17648e-06	2.19799e-06	1.7096e-06	1.63747e-06	1.83608e-06	4.89419e-05	7.71168e-05	0.000117664
Bra019044	early nodulin-like protein 2	2.17837e-06	2.01164e-06	2.03153e-06	4.74037e-05	4.54037e-05	6.78807e-05	6.03137e-05	0.000124733	9.06274e-05
Bra034219	two-pore channel 1	2.1542e-06	1.98932e-06	2.00899e-06	7.81295e-05	4.48999e-05	8.39095e-05	0.000149111	8.81068e-05	8.96218e-05
Bra007758	unknown protein;	6.75295e-06	6.23609e-06	6.29773e-06	0.000195935	9.38343e-05	0.000157823	4.67431e-06	5.52391e-06	5.6189e-06
Bra007994	HISTIDINE BIOSYNTHESIS 6B	2.86037e-06	2.64144e-06	2.66755e-06	0.000103741	0.000178856	8.91325e-05	5.93973e-05	7.01934e-05	9.52005e-05
Bra028459	unknown protein;	7.52846e-05	6.41746e-05	3.78052e-05	8.4014e-06	1.20704e-05	1.80459e-05	4.00854e-07	4.73714e-07	4.81859e-07
Bra034344	Calcium-dependent phosphotriesterase superfamily protein	4.19778e-06	3.87649e-06	3.91481e-06	3.04494e-06	2.91647e-06	3.2702e-06	0.000348678	0.000137351	0.000349283
Bra025920	ketose-bisphosphate aldolase class-II family protein	1.15909e-06	1.07037e-06	1.08095e-06	2.5223e-05	1.61059e-05	1.80593e-05	4.81384e-05	5.6888e-05	2.89331e-05
Bra016524	CONTAINS InterPro DOMAIN/s: Protein of unknown function DUF985 (InterPro:IPR009327), RmlC-like jelly roll fold (InterPro:IPR014710); Has 1465 Blast hits to 1465 proteins in 584 species: Archae - 10; Bacteria - 1038; Metazoa - 19; Fungi - 43; Plants - 51; Viruses - 0; Other Eukaryotes - 304 (source: NCBI BLink).	8.26159e-06	7.62926e-06	7.70467e-06	0.000179781	0.000286993	0.000128721	5.71857e-06	6.75798e-06	6.87419e-06
Bra031219	copper ion binding;cobalt ion binding;zinc ion binding	0.000256724	0.000177806	0.000359127	0.000139665	0.000267544	0.000249995	4.44253e-06	5.25e-06	5.34028e-06
Bra037580	Eukaryotic aspartyl protease family protein	0.000155629	5.7487e-05	8.70829e-05	2.25777e-06	2.16251e-06	2.4248e-06	2.15449e-06	2.54609e-06	2.58987e-06
Bra027049	ACC oxidase 2	4.85368e-06	4.48219e-06	4.5265e-06	0.000140828	0.000134887	7.56234e-05	0.000335966	0.000158812	0.000201929
Bra011830	myo-inositol-1-phosphate synthase 1	3.04545e-06	2.81236e-06	2.84015e-06	0.000198817	0.000380857	0.000877825	2.10802e-06	2.49118e-06	2.53401e-06
Bra031205	Adenine nucleotide alpha hydrolases-like superfamily protein	8.26159e-06	7.62926e-06	7.70467e-06	0.000239708	0.000286993	0.000128721	0.000171557	0.000270319	0.000274967
Bra013576	Peroxidase superfamily protein	4.69238e-06	4.33324e-06	4.37607e-06	0.000102111	0.000260808	0.000292441	3.24801e-06	3.83837e-06	3.90437e-06
Bra030768	Protein of unknown function, DUF538	9.19041e-06	8.48699e-06	8.57088e-06	0.000333322	0.000446962	0.000143192	0.000572534	0.000676598	0.000611762
Bra022440	Glycosyl hydrolase family protein	2.0145e-06	1.86031e-06	1.8787e-06	4.38377e-05	8.39763e-05	3.13871e-05	9.76088e-05	6.59144e-05	6.70478e-05
Bra023707	Aluminium induced protein with YGL and LRDR motifs	9.24511e-06	8.53751e-06	8.6219e-06	0.000335306	0.000385391	0.000504156	0.000447955	0.0003025	0.000153851
Bra003428	N-terminal nucleophile aminohydrolases (Ntn hydrolases) superfamily protein	0.000417896	0.000192955	0.000129908	5.05214e-06	4.83899e-06	5.42589e-06	4.82104e-06	5.69731e-06	5.79528e-06
Bra005153	Bifunctional inhibitor/lipid-transfer protein/seed storage 2S albumin superfamily protein	1.35059e-05	1.24722e-05	1.25955e-05	0.000783741	0.000750675	0.00021043	0.00130881	0.00110478	0.00134854
Bra017469	Thiolase family protein	3.59532e-06	3.32014e-06	3.35296e-06	2.60793e-06	2.4979e-06	2.80087e-06	0.000398182	8.82292e-05	0.000209408
Bra005012	delta1-pyrroline-5-carboxylate synthase 1	2.16622e-06	2.00042e-06	2.02019e-06	0.000848506	0.000647156	0.000118129	0.00110958	0.00122266	0.00122566
Bra023545	NAD(P)-binding Rossmann-fold superfamily protein	5.73129e-06	5.29263e-06	5.34494e-06	0.000124719	0.000199095	8.9297e-05	0.000158685	0.00023441	9.53762e-05
Bra025649	avirulence induced gene 2 like protein	1.10155e-05	1.01724e-05	1.02729e-05	0.000559319	0.000153063	0.000257441	0.000457486	0.000450532	0.000366623
Bra019170	Double Clp-N motif protein	0.000198278	0.000366205	0.000184912	0.000143825	0.000596946	0.000257441	4.57486e-06	5.40638e-06	5.49935e-06
Bra016002	kunitz trypsin inhibitor 1	7.25784e-06	6.70234e-06	6.76859e-06	0.000631754	0.000252125	0.000169623	0.00095452	0.000356215	0.00042273
Bra016748	eukaryotic release factor 1-2	7.14105e-05	6.59449e-05	9.98951e-05	2.58995e-06	2.48068e-06	2.78155e-06	4.94295e-05	0.000116828	0.000207964
Bra002289	sucrose phosphate synthase 1F	1.49057e-06	1.37649e-06	1.39009e-06	3.24365e-05	3.1068e-05	5.80602e-05	2.06351e-05	7.31574e-05	4.96103e-05
Bra001931	glutathione-disulfide reductase	0.000320905	0.000296343	0.000299272	0.000395716	0.000379021	0.00044999	0.000533103	0.000525	0.000507326
Bra008811	elongation factor family protein	0.000184354	0.000148963	0.000107454	3.34311e-05	6.40412e-05	0.000197474	1.59509e-06	1.88501e-06	1.91743e-06
Bra040854	PATELLIN 2	0.000505993	0.000528213	0.000512917	0.000207453	0.000229269	0.000274215	0.000319786	0.000377911	0.000329494
Bra035074	vacuolar ATP synthase subunit A	0.00164542	0.00168064	0.0016275	0.00198923	0.0018187	0.00180622	0.00232965	0.00222286	0.00213663
Bra014308	myrosinase-binding protein 2	0.000169515	0.000136973	0.000138327	0.000245921	0.000191381	0.000264114	0.000484011	0.00036399	0.000423142
Bra026349	protochlorophyllide oxidoreductase B	0.00124094	0.00158956	0.000821302	0.000406515	0.000556234	0.000654883	8.31256e-05	0.000196469	0.000133232
Bra011839	FK506-binding protein 16-2	0.000543613	0.000502006	0.000434544	0.000225326	0.000215819	0.000181496	0.000268773	0.00038115	0.000323087
Bra036764	annexin 1	0.00102892	0.000950168	0.000639707	0.00213242	0.00180416	0.00129776	0.00383234	0.00296584	0.00399527
Bra034402	annexin 1	0.00129033	0.00123571	0.00093594	0.00228792	0.00215819	0.00156366	0.00387033	0.00293192	0.00405598
Bra011412	aminopeptidase M1	0.000231287	0.000295732	0.000248879	0.000412968	0.000432627	0.000374219	0.000443337	0.00058213	0.000488516
Bra033657	Granulin repeat cysteine protease family protein	0.000506471	0.000498888	0.000503819	0.000416362	0.000351879	0.000394557	0.000490802	0.000524772	0.000533796
Bra011449	3-deoxy-d-arabino-heptulosonate 7-phosphate synthase	0.000277353	0.000288141	0.000258657	0.000276627	0.00031313	0.000459142	0.000143985	0.000113437	0.000144235
Bra009483	glutamate synthase 1	0.00110257	0.00102703	0.0011713	0.00104317	0.00113238	0.00123238	0.000703455	0.000839157	0.000725948
Bra016270	Aldolase superfamily protein	0.000510434	0.000404029	0.000340018	0.00031736	0.000354632	0.000426047	0.000201895	0.000178944	0.000151684
Bra024580	glutamate:glyoxylate aminotransferase	0.00211206	0.00201042	0.00239393	0.00188557	0.00185117	0.00215163	0.00137198	0.00154161	0.0014059
Bra016357	Phosphoglucomutase/phosphomannomutase family protein	0.000586105	0.000565848	0.00052175	0.000560415	0.000610808	0.000518857	0.00082983	0.000740943	0.000908855
Bra016330	aldehyde dehydrogenase 2B7	0.000260309	0.000240386	0.000323682	0.000398621	0.000341613	0.000405578	0.000500508	0.000449525	0.000505387
Bra040093	acyl-CoA oxidase 1	7.01737e-05	4.32019e-05	6.54433e-05	0.000169673	0.000162514	9.11125e-05	0.000242867	0.000210474	0.000194631
Bra027209	phospholipase D alpha 1	0.000230101	0.000194782	0.000178825	0.000292089	0.000279765	0.000313697	0.000318546	0.000282333	0.000287188
Bra024417	2-oxoglutarate dehydrogenase, E1 component	0.000122539	9.90149e-05	8.57088e-05	0.000122218	0.000117062	0.000143192	0.000180242	0.000225533	0.000191176
Bra007041	high cyclic electron flow 1	0.00165072	0.00166296	0.00209924	0.00182329	0.00177243	0.00192894	0.00122051	0.00125822	0.00131108
Bra028288	GroES-like zinc-binding alcohol dehydrogenase family protein	0.000269337	0.000248723	0.000376772	0.000130246	0.000155939	0.000104911	0.000217504	0.000220318	0.000224106
Bra030858	chaperonin 60 beta	0.00266002	0.00262296	0.00241763	0.00220747	0.00261551	0.00266932	0.00179442	0.00197305	0.00183817
Bra016353	glutamate:glyoxylate aminotransferase	0.00230702	0.00222047	0.00254544	0.00193271	0.00182859	0.00227819	0.00141696	0.00167451	0.00151405
Bra032750	S-adenosyl-L-homocysteine hydrolase	0.001313	0.0012125	0.000985563	0.00174221	0.00198019	0.00169646	0.00183985	0.00165034	0.00173201
Bra033287	RNA-binding (RRM/RBD/RNP motifs) family protein	0.000485368	0.000522922	0.000377208	0.000234714	0.00039342	0.000315097	0.000167983	0.000132344	0.000201929
Bra024568	Phosphoglucomutase/phosphomannomutase family protein	0.000612746	0.000565848	0.000546596	0.000599064	0.000647827	0.000664137	0.000774508	0.000849906	0.00101969
Bra006138	Nitrilase/cyanide hydratase and apolipoprotein N-acyltransferase family protein	0.000213349	0.000197019	0.00023876	0.000154757	0.000207518	0.000166205	0.000295355	0.000279231	0.000284032
Bra011919	chaperonin 60 beta	0.00293776	0.00278368	0.00257296	0.00231626	0.00271549	0.00276622	0.00196275	0.00211053	0.00193427
Bra005141	acetyl Co-enzyme a carboxylase carboxyltransferase alpha subunit	0.000303751	0.000317903	0.000321045	0.000176265	0.000196966	0.000236631	0.000112135	0.00018221	0.000151644
Bra011664	Ribosomal protein L2 family	0.00102341	0.00116745	0.000785996	0.000611348	0.00054373	0.000656575	0.00104175	0.00103413	0.00120218
Bra032118	Cytosol aminopeptidase family protein	0.00125208	0.00104613	0.00119548	0.00181644	0.00161554	0.00164891	0.00156827	0.00131683	0.0014635
Bra001470	phosphoglycerate kinase 1	0.00449267	0.00444515	0.00520734	0.00500465	0.00470432	0.00527489	0.00373172	0.0039375	0.00365809
Bra017436	ARM repeat superfamily protein	4.23209e-05	5.86227e-05	3.94681e-05	6.13966e-05	5.88063e-05	6.59387e-05	2.9294e-05	3.46185e-05	3.52138e-05
Bra003345	ketol-acid reductoisomerase	0.000975681	0.00109582	0.000737765	0.000535579	0.000677869	0.000760086	0.000438068	0.000409839	0.00048271
Bra026004	SOUL heme-binding family protein	0.000201712	0.000248364	0.000188114	0.000341402	0.000373713	0.000419039	0.000372326	0.000495	0.000335675
Bra007002	chloroplast RNA-binding protein 29	0.00024043	0.000444056	0.000224223	6.97602e-05	3.34085e-06	3.74605e-06	3.32846e-06	3.93344e-06	4.00107e-06
Bra038734	heat shock protein 70	0.00176823	0.00172116	0.00151533	0.00178527	0.00207518	0.00188011	0.00216672	0.00236508	0.00248528
Bra038863	photosystem II subunit O-2	0.00648324	0.0060301	0.00713365	0.00436441	0.00463395	0.00454195	0.0045199	0.00564667	0.00535567
Bra033478	Rubredoxin-like superfamily protein	0.000501025	0.000616904	0.000545126	0.000363428	0.000406111	0.000390314	0.000346804	0.000273226	0.000208443
Bra027196	MAR binding filament-like protein 1	0.000151003	9.96043e-05	0.000120707	1.56476e-06	1.49874e-06	1.68052e-06	1.49318e-06	3.52917e-05	1.79493e-06
Bra004244	Zincin-like metalloproteases family protein	8.12332e-05	0.000105022	9.09087e-05	0.000129633	0.000158026	0.000126566	8.99658e-05	7.97385e-05	6.75914e-05
Bra028922	TCP-1/cpn60 chaperonin family protein	0.00183964	0.00157749	0.00161759	0.0012391	0.00140593	0.0015355	0.00107327	0.00122536	0.00100589
Bra039342	phosphoglycerate kinase 1	0.00504783	0.00493041	0.00564303	0.0052576	0.00492337	0.00552051	0.00409878	0.00439381	0.00409243
Bra037182	ferredoxin-NADP(+)-oxidoreductase 1	0.00248166	0.0022127	0.00219466	0.00183116	0.0020809	0.00223329	0.00165854	0.00161	0.00174449
Bra037682	O-acetylserine (thiol) lyase B	0.00215608	0.00176983	0.00212245	0.00223009	0.00235792	0.00217733	0.00154769	0.00143707	0.00172756
Bra028624	peroxisomal NAD-malate dehydrogenase 2	0.0019957	0.00184296	0.00210394	0.00229731	0.00298409	0.00229828	0.00165168	0.00163249	0.00169666
Bra038797	tripeptidyl peptidase ii	1.18112e-06	1.09072e-06	3.30451e-05	8.56751e-07	8.20604e-07	9.20133e-07	8.99316e-05	0.000115939	8.84496e-05
Bra028181	Ribulose bisphosphate carboxylase (small chain) family protein	0.0327893	0.0325817	0.0328143	0.0292784	0.0273104	0.0261414	0.0214355	0.0265864	0.0207414
Bra039301	plasma membrane intrinsic protein 1B	0.000998472	0.0010245	0.00103463	0.000603551	0.000501008	0.000734627	0.000806318	0.000680625	0.000784639
Bra002116	Cobalamin-independent synthase family protein	0.00241606	0.00279361	0.00217745	0.00343143	0.00407658	0.00343221	0.00299339	0.0029562	0.00287188
Bra022964	Apoptosis inhibitory protein 5 (API5)	2.81884e-06	5.20618e-05	2.62882e-06	0.000122682	0.000176259	0.000109798	1.95116e-06	2.30581e-06	2.34546e-06
Bra002468	4-hydroxy-3-methylbut-2-enyl diphosphate synthase	0.000604263	0.000620015	0.000480043	0.000389612	0.000342076	0.000557913	0.000170403	0.000292911	0.000167595
Bra010189	UDP-Glycosyltransferase superfamily protein	0.000254619	0.000313509	0.000237455	0.000107738	0.000191643	0.000297535	1.4687e-06	3.47131e-05	1.7655e-06
Bra031790	aspartic proteinase A1	2.52549e-06	4.6644e-05	7.06575e-05	1.83191e-06	1.75463e-06	1.96744e-06	0.00029718	0.000103293	0.000189124
Bra037389	thylakoid rhodanese-like	0.00061042	0.000501066	0.00066415	0.000418181	0.000400537	0.000501954	0.000352104	0.000277402	0.000366823
Bra032110	aldehyde dehydrogenase 11A3	0.000313141	0.000520513	0.000321235	0.000885856	0.000979018	0.000707445	0.000520205	0.000537913	0.000442942
Bra034107	P-loop containing nucleoside triphosphate hydrolases superfamily protein	9.38477e-05	8.66648e-05	0.000175043	0.000306334	0.000293409	0.000292441	0.0001624	0.000153535	0.000117131
Bra021863	NAD(P)-binding Rossmann-fold superfamily protein	4.83856e-06	4.46823e-06	9.02479e-05	3.50974e-06	3.36167e-06	3.76939e-06	0.000234444	0.000158318	0.0002013
Bra006965	Pyruvate kinase family protein	0.000294721	0.00029938	0.000302339	0.000470319	0.000470952	0.000551032	0.000673207	0.000409839	0.000588545
Bra007085	tryptophan synthase alpha chain	0.000499414	0.00046119	0.000186299	0.000579616	0.000451069	0.000544683	0.000172844	8.17042e-05	8.31091e-05
Bra034800	Adenine nucleotide alpha hydrolases-like superfamily protein	0.000155318	0.00014343	7.24239e-06	5.63314e-06	5.39547e-06	6.04987e-06	0.000322527	0.00038115	0.000323087
Bra029563	photosystem II subunit Q-2	0.00384858	0.0041252	0.00429416	0.00468597	0.004918	0.00348001	0.00223581	0.00236111	0.00303073
Bra000460	glutathione S-transferase phi 8	0.00166154	0.00186793	0.00181902	0.00225326	0.00235895	0.00191345	0.00270023	0.00230463	0.00276502
Bra028406	Ribulose bisphosphate carboxylase (small chain) family protein	0.0207663	0.020841	0.0193664	0.0169305	0.0162759	0.0156428	0.0117013	0.0159339	0.0142801
Bra035836	glutamate-1-semialdehyde-2,1-aminomutase	0.00118212	0.00133423	0.00110244	0.00135767	0.00143727	0.00150927	0.00100008	0.00104756	0.00114754
Bra010728	rotamase CYP 1	0.000722409	0.000750507	0.000757925	0.00209605	0.00138024	0.000984863	0.00187516	0.00162506	0.00240437
Bra011329	ATPase, F0 complex, subunit B/B', bacterial/chloroplast	0.00203811	0.00194702	0.00242505	0.002396	0.00161132	0.00202575	0.00136211	0.00109228	0.0012865
Bra030945	phosphoenolpyruvate carboxylase 1	0.000370572	0.00032733	0.000330566	0.000444106	0.000514921	0.000527167	0.000390334	0.00048764	0.000415589
Bra040136	unknown protein;	0.000245423	0.000129508	9.80911e-05	2.54318e-06	2.43588e-06	5.46264e-05	2.42684e-06	2.86795e-06	2.91726e-06
Bra015314	Lactate/malate dehydrogenase family protein	0.00149704	0.00177128	0.00148338	0.00207001	0.00204768	0.0018587	0.00197532	0.00195167	0.00206308
Bra010280	Uncharacterised BCR, YbaB family COG0718	0.000678985	0.000705394	0.000712366	0.00043095	0.000530702	0.000528951	0.000528733	0.00055541	0.000635581
Bra037714	Ribosomal L38e protein family	0.00202589	0.00145509	0.00146947	0.000979676	0.000625562	0.000701434	0.000934862	0.00110478	0.000749187
Bra018700	mitochondrial lipoamide dehydrogenase 1	0.000612694	0.000678959	0.000571392	0.000666644	0.000532098	0.00066823	0.000911813	0.000801893	0.000866663
Bra010696	Ribosomal protein S25 family protein	0.0011505	0.00132806	0.00120707	0.00104317	0.000699413	0.00123238	0.000497727	0.000705833	0.000478647
Bra024346	annexin 2	4.91512e-06	4.53893e-06	4.58379e-06	0.000106958	6.82971e-05	3.82903e-06	0.000306197	0.00028144	0.000204485
Bra027521	HAD superfamily, subfamily IIIB acid phosphatase	0.000285511	0.000158195	0.000266264	8.28403e-05	3.96726e-06	4.44843e-06	0.000553356	0.000373676	0.000380102
Bra006954	monodehydroascorbate reductase 1	0.000536813	0.00062792	0.000634127	0.00101241	0.0012432	0.000864267	0.000941324	0.000731855	0.000952883
Bra005677	ferretin 1	5.62746e-06	5.19675e-06	5.24811e-06	0.00012246	0.000117293	4.38396e-06	0.000428478	0.000322228	0.000327769
Bra001972	cold, circadian rhythm, and RNA binding 1	9.4706e-06	8.74574e-06	8.83219e-06	0.000137394	6.57985e-06	7.37789e-06	0.000327772	0.000309878	0.000315207
Bra009790	Transducin/WD40 repeat-like superfamily protein	1.18112e-06	1.09072e-06	1.1015e-06	8.56751e-07	1.64121e-05	9.20133e-07	3.27024e-05	3.86464e-05	3.93109e-05
Bra011568	rotamase cyclophilin 5	0.00136244	0.00117428	0.00118589	0.00151535	0.00145141	0.00162745	0.00163464	0.00208035	0.00166267
Bra011422	lysine-ketoglutarate reductase/saccharopine dehydrogenase bifunctional enzyme	1.48487e-06	1.37123e-06	1.38478e-06	5.38541e-05	1.03164e-06	1.15676e-06	0.000226119	0.000170048	9.88411e-05
Bra002904	SHV3-like 1	0.000143433	0.000151377	0.000152874	0.000252674	0.000185069	0.000191553	9.92828e-05	0.00013409	0.000136395
Bra025749	dehydroascorbate reductase	0.000583354	0.000336691	0.000476026	0.00111076	0.00126654	0.000738482	0.00166563	0.000954366	0.00109212
Bra028411	alpha/beta-Hydrolases superfamily protein	4.22059e-06	7.79512e-05	3.93608e-06	3.06149e-06	2.93232e-06	3.28797e-06	0.000146072	0.000207147	7.02363e-05
Bra007034	uracil phosphoribosyltransferase	5.33738e-06	4.92887e-06	4.97759e-06	0.000116147	0.000222494	0.00012474	7.38894e-05	4.36598e-06	4.44106e-06
Bra003155	Ribosomal protein L36e family protein	1.38677e-05	0.000256125	0.000258657	1.00592e-05	9.63478e-06	1.08033e-05	0.000287971	0.000340312	0.000461553
Bra030906	aldehyde dehydrogenase 7B4	3.0817e-06	2.84584e-06	2.87397e-06	0.000223537	8.56425e-05	2.40074e-06	0.000575942	0.000378125	0.000435911
Bra016810	Glycine cleavage T-protein family	0.00148103	0.00161315	0.00155827	0.00201085	0.00184686	0.00183419	0.00218173	0.00177062	0.00202225
Bra037640	chloroplast chaperonin 10	0.00145261	0.00123825	0.00135469	0.00105368	0.00100923	0.00104458	0.000696102	0.00100543	0.000929746
Bra004475	ADP-ribosylation factor A1E	0.00197365	0.00190184	0.00184061	0.0029255	0.00339825	0.00260713	0.00320745	0.00308851	0.00228481
Bra009397	peroxisomal NAD-malate dehydrogenase 2	0.00138832	0.00152244	0.00186117	0.00191967	0.00220039	0.00196029	0.00141143	0.00149053	0.00137177
Bra033349	Protein of unknown function, DUF538	9.3565e-06	0.000172807	8.72577e-06	6.78691e-06	6.50057e-06	7.289e-06	0.000194294	0.000306145	0.000233557
Bra040977	photosystem II reaction center protein B	0.00210926	0.00224294	0.00226511	0.00180817	0.0018207	0.00169297	0.00196879	0.00240506	0.00236664
Bra006429	Cobalamin-independent synthase family protein	0.00231454	0.00269986	0.00206385	0.00322525	0.00400605	0.00319496	0.00292312	0.00292298	0.00295635
Bra007885	SPFH/Band 7/PHB domain-containing membrane-associated protein family	5.44975e-06	0.000201305	0.000101648	0.000197654	0.000302904	0.000212276	3.77225e-06	4.45789e-06	4.53455e-06
Bra016382	UDP-glucosyl transferase 85A2	3.23579e-06	2.98813e-06	3.01766e-06	0.000117357	0.000112406	2.52078e-06	0.000291171	0.000291156	0.000350011
Bra037536	presequence protease 1	0.000397548	0.00037978	0.000383534	0.000328144	0.000361921	0.00035242	0.000237222	0.000325194	0.000239535
Bra004031	alpha-xylosidase 1	5.04279e-05	7.76137e-05	4.70285e-05	9.75435e-05	5.83926e-05	5.23798e-05	0.000116352	0.00015125	0.00019581
Bra027376	Subtilase family protein	6.00456e-05	7.39331e-05	9.33298e-05	0.000159702	0.000139059	0.000171517	0.000110834	0.000114607	0.000183194
Bra001085	polyribonucleotide nucleotidyltransferase, putative	0.000185505	0.000218026	0.000188727	1.22327e-06	9.37325e-05	1.31376e-06	1.16731e-06	1.37948e-06	1.4032e-06
Bra026426	Aldolase superfamily protein	0.00216924	0.00188302	0.00218486	0.00176232	0.00168797	0.00145332	0.00147149	0.001597	0.00166056
Bra039844	nitrite reductase 1	0.000827137	0.000622379	0.00068567	0.000511093	0.000638518	0.000548904	0.000508919	0.000451065	0.000458821
Bra002485	aleurain-like protease	4.3264e-06	7.99054e-05	4.03476e-06	0.000219677	0.000270525	0.000235928	0.000329415	0.00017695	0.000323987
Bra039747	thioredoxin-dependent peroxidase 1	0.000575251	0.000442686	0.000447061	0.00104317	0.00119899	0.000672208	0.000995455	0.000862685	0.000797745
Bra006164	Protein of unknown function (DUF3411)	0.000328715	0.000265611	0.000344876	2.9805e-06	2.85475e-06	3.20099e-06	2.84416e-06	0.000168056	3.41891e-06
Bra014973	Nucleic acid-binding proteins superfamily	0.000121977	7.50943e-05	0.000151673	2.94929e-06	2.82486e-06	3.16747e-06	2.81437e-06	6.65183e-05	3.38311e-06
Bra040651	Cystatin/monellin superfamily protein	0.00069963	0.000646082	0.000652468	0.000405992	0.000194432	0.00032702	0.000484275	0.000572297	0.000698566
Bra000737	vacuolar ATP synthase subunit E1	0.000720733	0.000665569	0.000705755	0.000653496	0.000575851	0.000645694	0.000723379	0.000825383	0.000869561
Bra020587	seryl-tRNA synthetase / serine--tRNA ligase	0.000137754	0.000190816	0.000224819	0.000299768	0.000478534	0.000348773	0.000262217	0.000253537	0.000229241
Bra024089	xyloglucan endotransglucosylase/hydrolase 24	0.000723703	0.000514087	0.000882585	0.000403809	0.000386772	0.000390314	0.000539472	0.000500914	0.000509528
Bra002710	xylose isomerase family protein	3.25614e-06	3.00692e-06	3.03664e-06	4.72381e-05	6.78676e-05	2.53663e-06	0.000112693	0.000133176	0.000108373
Bra014002	S-adenosyl-L-homocysteine hydrolase	0.00133222	0.00129027	0.00093939	0.00164987	0.00187374	0.00164536	0.00179932	0.00162135	0.00164923
Bra029879	manganese superoxide dismutase 1	0.000605135	0.00062091	0.000564342	0.000780348	0.000980995	0.000785698	0.00065157	0.00066	0.000783241
Bra008402	proteasome subunit PAB1	0.000198278	0.000183102	0.000308187	0.000479416	0.000459189	0.000360418	0.00032024	0.000378447	0.000384954
Bra040870	Senescence/dehydration-associated protein-related	3.4211e-06	3.15925e-06	3.19048e-06	0.000248156	7.13058e-05	2.66514e-06	0.000355206	0.000335815	0.000398521
Bra040427	ribosome recycling factor, chloroplast precursor	0.000407391	0.000517289	0.000759858	0.000480202	0.000495322	0.000515727	0.000211493	0.000249934	0.000338976
Bra000097	histone H2A 11	0.000347727	0.00042815	0.000324286	0.000336307	0.000241588	0.000361186	0.000240692	0.000189627	0.000192888
Bra004055	hydroxypyruvate reductase	0.00177046	0.00219233	0.00232657	0.00207229	0.00206873	0.00238233	0.00169898	0.00144824	0.00130574
Bra016184	phosphoglucomutase, putative / glucose phosphomutase, putative	2.53373e-06	7.01942e-05	2.36293e-06	7.35157e-05	0.000105621	9.86928e-05	1.75382e-06	2.07259e-06	2.10823e-06
Bra019845	aconitase 3	0.000266438	0.000260519	0.000248478	0.000329689	0.000272224	0.000305241	0.000412245	0.000410252	0.00031298
Bra025219	glyceraldehyde 3-phosphate dehydrogenase A subunit	0.00482303	0.00468035	0.00499344	0.00397284	0.0041176	0.00433043	0.00415891	0.00464735	0.0044552
Bra030537	photosystem II family protein	0.000270903	0.000333559	0.000336855	0.000196505	6.27381e-06	7.03473e-06	6.25053e-06	7.38663e-06	7.51365e-06
Bra013997	glycine-rich RNA-binding protein 2	0.000214232	0.000296752	0.00019979	0.000233095	0.000297681	0.00025034	0.000370721	0.000438103	0.00035651
Bra039757	O-Glycosyl hydrolases family 17 protein	9.2268e-05	8.5206e-05	2.86827e-06	0.000133857	0.000128209	9.58396e-05	2.12889e-06	2.51584e-06	2.5591e-06
Bra000311	Chitinase family protein	5.79544e-06	5.35187e-06	5.40477e-06	0.000126115	0.000241588	9.02966e-05	8.02307e-05	4.74067e-06	4.82219e-06
Bra023165	myo-inositol monophosphatase like 1	0.000125933	0.000193825	0.00019574	0.000243595	0.000291647	0.000359722	8.71696e-05	0.000171689	0.000104785
Bra014179	RAB GTPase homolog G3E	0.000517726	0.000478101	0.000413851	0.000375543	0.000411084	0.000403325	0.000665533	0.0006655	0.000492323
Bra013210	AMP-dependent synthetase and ligase family protein	2.1542e-06	1.98932e-06	2.00899e-06	7.81295e-05	1.49666e-06	6.71276e-05	0.000149111	0.000158592	0.000215092
Bra013859	acyl carrier protein 4	0.000366893	0.000564686	1.14053e-05	0.000620976	0.000509809	0.000762189	8.46528e-06	1.00039e-05	1.0176e-05
Bra016010	basic transcription factor 3	9.3565e-06	0.000172807	8.72577e-06	0.000135738	0.000260023	0.00029156	6.47645e-06	7.65361e-06	7.78522e-06
Bra037484	Lactoylglutathione lyase / glyoxalase I family protein	0.000282396	8.69274e-06	8.77866e-06	6.82805e-06	6.53997e-06	7.33318e-06	0.000390942	0.000308	0.000313296
Bra034394	copper/zinc superoxide dismutase 2	0.000150066	0.00013858	6.99748e-06	0.000326559	0.000208521	0.000116906	5.19368e-06	6.13768e-06	6.24322e-06
Bra017940	DPP6 N-terminal domain-like protein	0.000110155	6.10341e-05	0.000102729	0.000159805	0.000244901	0.000205953	0.000137246	0.000108128	0.000146649
Bra004639	NADPH-dependent thioredoxin reductase C	0.000238492	0.000275298	0.000305821	0.000129746	0.000186408	0.000185793	0.000144446	0.000146315	0.000198441
Bra037380	unknown protein;	0.00230101	0.00256758	0.00178825	0.00132135	0.00106577	0.0014938	0.00152636	0.00149009	0.00183481
Bra036321	Cysteine proteinases superfamily protein	4.33849e-06	4.00643e-06	4.04603e-06	3.147e-06	0.000120569	3.37982e-06	0.000150152	0.000212933	0.000324892
Bra004627	S-formylglutathione hydrolase	5.48826e-06	5.0682e-06	5.1183e-06	3.98102e-06	3.81306e-06	0.000171021	0.000341902	0.000269364	0.000319662
Bra006963	Thioredoxin superfamily protein	0.00205305	0.00247293	0.0019979	0.00129497	0.00142639	0.0012517	0.0014211	0.00197147	0.00215391
Bra033708	translocase of outer membrane 22-V	1.60122e-05	1.47866e-05	1.49328e-05	0.000232294	1.11247e-05	1.2474e-05	0.000332502	0.000392938	0.000399695
Bra027469	thioredoxin 3	0.00252549	0.00256542	0.00141315	0.00375543	0.00386018	0.00226255	0.00515694	0.00464817	0.00577879
Bra012899	methyl esterase 10	0.000118563	5.47443e-06	5.52854e-06	4.30011e-06	4.11868e-06	4.61822e-06	0.000164136	0.000145477	9.86524e-05
Bra014955	uricase / urate oxidase / nodulin 35, putative	5.10914e-06	4.7181e-06	4.76473e-06	3.70601e-06	0.00010649	3.98018e-06	0.000176824	0.000250757	0.000127534
Bra006975	glutamate-ammonia ligases;catalytics;glutamate-ammonia ligases	1.83374e-06	1.69339e-06	1.71013e-06	3.99042e-05	2.54804e-05	1.42854e-06	5.07717e-05	6e-05	6.10317e-05
Bra039540	pyruvate orthophosphate dikinase	1.77506e-06	1.6392e-06	1.6554e-06	2.57515e-05	1.23325e-06	5.53131e-05	8.60073e-05	8.712e-05	7.38484e-05
Bra015047	Heat shock protein 70 (Hsp 70) family protein	2.3321e-06	0.00135677	0.000978702	1.69163e-06	1.62026e-06	1.81678e-06	0.00138826	0.00167874	0.00149416
Bra010167	Single hybrid motif superfamily protein	0.000467825	0.000432019	0.000261773	0.000271477	0.000195017	0.00021867	0.000582881	0.000612289	0.000389261
Bra008737	formate dehydrogenase	4.04474e-06	7.47032e-05	3.77208e-06	0.000146696	0.000168609	6.30195e-05	0.000279972	0.000231602	0.000471168
Bra032344	carbamoyl phosphate synthetase B	0.000211317	0.000256125	0.000184755	0.000201184	0.000192696	0.000288089	7.31355e-05	0.00015125	9.89041e-05
Bra025431	Ribulose bisphosphate carboxylase (small chain) family protein	0.0104689	0.00982615	0.00960317	0.00896323	0.00858506	0.00795508	0.00754346	0.00877417	0.00714004
Bra007417	citrate synthase 2	3.06347e-06	2.829e-06	2.85696e-06	8.88858e-05	2.12839e-06	4.77307e-05	0.000148435	0.000100237	0.000178431
Bra004531	cellular apoptosis susceptibility protein, putative / importin-alpha re-exporter, putative	4.7987e-05	2.95428e-05	2.98348e-05	3.48083e-05	3.33397e-05	3.73833e-05	5.536e-05	6.54222e-05	5.32378e-05
Bra004214	Glyoxalase/Bleomycin resistance protein/Dioxygenase superfamily protein	0.000501025	0.000546801	0.000637161	0.000528623	0.000474675	0.00056773	0.00066208	0.000707903	0.000720076
Bra016261	SPFH/Band 7/PHB domain-containing membrane-associated protein family	0.000217228	5.01504e-06	5.06461e-06	3.93926e-06	3.77306e-06	4.23068e-06	0.000225544	0.000222115	0.000271122
Bra000592	Leucine-rich repeat protein kinase family protein	1.88036e-06	1.73644e-06	1.75361e-06	4.09187e-05	3.91923e-05	5.85944e-05	2.60313e-05	1.53814e-06	3.12917e-05
Bra004781	O-acetylserine (thiol) lyase B	0.00172575	0.00137635	0.00168258	0.00167856	0.00196199	0.00177218	0.00119455	0.000994583	0.00140331
Bra027017	unknown protein;	0.000329063	0.000303877	0.000245505	0.000190954	0.000228622	0.000307621	4.55547e-06	0.000107669	5.47605e-06
Bra011722	methyl esterase 9	6.0435e-06	5.58094e-06	5.6361e-06	0.000263026	0.000251929	4.70807e-06	0.000627485	0.000346051	0.000452573
Bra003537	D-isomer specific 2-hydroxyacid dehydrogenase family protein	4.96223e-06	4.58243e-06	4.62773e-06	3.59945e-06	6.89518e-05	3.86573e-06	0.000103044	0.000121773	8.25781e-05
Bra031652	amidase 1	3.68926e-06	3.40689e-06	3.44057e-06	8.02823e-05	5.12634e-05	8.62214e-05	5.10732e-05	3.01781e-06	3.06971e-06
Bra006794	Ubiquitin-like superfamily protein	0.000334017	1.54226e-05	1.5575e-05	1.21143e-05	1.16032e-05	1.30105e-05	0.000346804	0.000409839	0.000277924
Bra041132	Kunitz family trypsin and protease inhibitor protein	0.000139926	6.46082e-06	6.52468e-06	5.0749e-06	4.86079e-06	5.45033e-06	0.000145283	0.000114459	0.000174641
Bra021327	thylakoid lumen 18.3 kDa protein	0.00202351	0.00151511	0.00229512	0.0015868	0.00159584	0.00140596	0.00234703	0.0022368	0.00250278
Bra025066	Proteasome component (PCI) domain protein	4.02378e-06	3.71581e-06	3.75254e-06	5.83745e-05	2.79558e-06	3.13465e-06	8.35563e-05	6.5829e-05	0.000133922
Bra009040	RAB GTPase homolog A4A	0.000487545	0.000192955	6.49542e-06	5.05214e-06	4.83899e-06	5.42589e-06	0.000337473	0.000398812	0.000289764
Bra028628	mitochondrial HSO70 2	2.28409e-06	2.10927e-06	2.13012e-06	0.000215385	1.5869e-06	1.77937e-06	0.000268773	0.000485779	0.000342092
Bra016163	Cupredoxin superfamily protein	2.88159e-06	2.66104e-06	2.68734e-06	2.09022e-06	4.00406e-05	2.24485e-06	0.000119676	4.71428e-05	4.79535e-05
Bra036452	CLIP-associated protein	1.0801e-06	9.97428e-07	1.00729e-06	3.13387e-05	4.50248e-05	4.20714e-05	7.47629e-07	2.65056e-05	8.98711e-07
Bra021477	Insulinase (Peptidase family M16) protein	0.000176832	0.00029938	0.000219883	0.000384806	0.000470952	0.000505113	0.000673207	0.00038573	0.000392363
Bra016269	senescence associated gene 24	0.000783115	0.000723177	1.21721e-05	9.46746e-06	9.06802e-06	1.01679e-05	0.000813094	0.000640588	0.000760204
Bra009998	unknown protein;	0.0001769	0.000196032	0.000164975	0.000179644	0.000294969	0.000303183	0.000146937	5.78815e-05	8.83153e-05
Bra013145	ARM repeat superfamily protein	1.83808e-06	6.78959e-05	3.42835e-05	1.33329e-06	1.27704e-06	1.43192e-06	5.08919e-05	6.0142e-05	3.05881e-05
Bra040749	Granulin repeat cysteine protease family protein	0.000509796	0.000596318	0.000697298	0.000517706	0.000495864	0.0004501	0.000752799	0.00063942	0.000876647
Bra020134	TCP-1/cpn60 chaperonin family protein	0.000398251	2.829e-06	2.85696e-06	0.000444429	0.000383111	0.000477307	2.1205e-06	2.50592e-06	2.54901e-06
Bra023645	Cobalamin-independent synthase family protein	0.00247696	0.00271861	0.00208278	0.00323997	0.00414711	0.00316333	0.00299339	0.00305584	0.00305771
Bra022449	eukaryotic initiation factor 4A-III	3.80681e-06	3.51545e-06	3.55019e-06	2.76134e-06	0.000185139	2.96562e-06	0.000289853	0.000217978	0.000285077
Bra007856	DNA repair ATPase-related	3.39864e-06	3.13852e-06	3.16954e-06	4.93054e-05	4.72252e-05	2.64765e-06	4.70499e-05	8.34026e-05	0.000141395
Bra024440	ADP-ribosylation factor-like A1D	8.44119e-06	7.79512e-06	7.87217e-06	0.000244919	0.000234586	0.000526076	5.84289e-06	6.90489e-06	0.000210709
Bra021847	Caleosin-related family protein	6.49866e-06	6.00126e-06	0.000121212	0.000188557	0.000180602	0.00015188	0.00031488	0.000372113	0.000324439
Bra011172	H(+)-ATPase 2	0.000851955	0.00101369	0.0008862	0.000522907	0.00055776	0.000765807	0.0007258	0.000750506	0.000736147
Bra006103	aspartate aminotransferase 3	3.43624e-06	3.17323e-06	3.2046e-06	0.000174478	2.38738e-06	2.67693e-06	0.000428134	0.000252976	0.00017155
Bra016405	PDI-like 1-1	0.000279014	0.000257659	0.00017347	0.000247363	0.000301543	0.000338117	0.000557932	0.000405748	0.00038693
Bra020813	Tyrosine transaminase family protein	0.000892631	0.000692421	0.00059937	0.00124318	0.00148841	0.00100136	0.00126045	0.00102224	0.00151517
Bra034363	60S acidic ribosomal protein family	0.00178684	0.00228473	0.00115366	0.00179463	0.00181441	0.00149908	0.000951408	0.0010119	0.000686202
Bra020793	long-chain acyl-CoA synthetase 6	2.46928e-06	2.28029e-06	2.30283e-06	7.16456e-05	1.71557e-06	3.8473e-05	0.000119644	0.000121192	6.16382e-05
Bra028271	2 iron, 2 sulfur cluster binding	1.43813e-05	1.32806e-05	1.34118e-05	0.000208635	9.99162e-06	1.12035e-05	0.000199091	0.000352917	0.000358985
Bra004970	Eukaryotic translation initiation factor 2 subunit 1	4.54146e-06	4.19386e-06	4.23532e-06	6.58847e-05	3.15525e-06	3.53794e-06	6.28708e-05	0.000111447	0.000113364
Bra028615	actin 7	0.00193632	0.00209248	0.00161369	0.00227119	0.00243297	0.00240711	0.00222433	0.00232532	0.0023653
Bra008533	unknown protein;	0.00192999	0.00220662	0.00162847	0.00113329	0.00114933	0.00136033	0.00133591	0.00127802	0.00175882
Bra040547	CONTAINS InterPro DOMAIN/s: Mediator complex subunit Med28 (InterPro:IPR021640); BEST Arabidopsis thaliana protein match is: unknown protein (TAIR:AT3G01670.1); Has 122 Blast hits to 112 proteins in 13 species: Archae - 0; Bacteria - 0; Metazoa - 0; Fungi - 0; Plants - 122; Viruses - 0; Other Eukaryotes - 0 (source: NCBI BLink).	0.000147121	7.76347e-05	0.000117603	0.000167698	0.000175225	0.000163731	0.000232767	0.000189114	0.000192366
Bra015995	sucrose synthase 6	4.94118e-05	3.042e-05	1.53603e-06	1.19473e-06	1.14432e-06	1.28311e-06	2.28015e-05	4.04189e-05	5.48185e-05
Bra030494	Late embryogenesis abundant protein	1.0286e-05	9.49869e-06	9.59257e-06	0.000820722	7.14632e-06	8.01307e-06	0.00121037	0.00134622	0.000941445
Bra020470	vegetative storage protein 2	0.000231818	0.000160556	0.000108095	0.000630575	0.000805295	0.000316038	0.000842422	0.000331847	0.000530441
Bra011079	regulatory particle AAA-ATPase 2A	0.000140242	0.000259016	0.000130788	0.000406908	0.000292306	0.000409698	0.000364026	0.000372833	0.000262554
Bra022356	actin 2	0.00144258	0.00150979	0.00134534	0.00160449	0.00170383	0.00172318	0.00156437	0.00173071	0.00184049
Bra019788	Nucleic acid-binding, OB-fold-like protein	8.51057e-05	5.89439e-05	3.96843e-05	1.54333e-06	1.47821e-06	1.6575e-06	1.47273e-06	5.22123e-05	1.77034e-06
Bra021555	Aldolase-type TIM barrel family protein	0.00344654	0.00334808	0.0035064	3.24677e-06	3.10978e-06	3.48696e-06	3.09825e-06	3.66138e-06	0.00301672
Bra038946	purple acid phosphatase 26	3.23579e-06	2.98813e-06	3.01766e-06	2.34714e-06	4.49623e-05	2.52078e-06	6.71932e-05	5.29375e-05	5.38478e-05
Bra016041	cinnamyl-alcohol dehydrogenase	4.38751e-06	4.0517e-06	4.09175e-06	3.18256e-06	6.09658e-05	3.41801e-06	9.11094e-05	7.17796e-05	7.3014e-05
Bra015025	beta-amylase 1	2.72488e-06	2.51632e-06	2.54119e-06	7.90616e-05	3.7863e-05	8.49105e-05	1.88612e-06	2.22895e-06	4.53455e-05
Bra029730	Rhodanese/Cell cycle control phosphatase superfamily protein	0.000320243	0.000443598	1.49328e-05	1.16147e-05	1.11247e-05	1.2474e-05	0.000554171	0.000261959	0.000266463
Bra020105	Myosin family protein with Dil domain	3.05143e-05	3.75718e-05	1.89716e-05	7.37805e-07	1.41335e-05	7.92387e-07	2.81622e-05	3.32809e-05	3.38532e-05
Bra014466	SEC7-like guanine nucleotide exchange family protein	8.77998e-07	1.6216e-05	8.18812e-07	6.36873e-07	6.10003e-07	6.83988e-07	1.21548e-05	1.4364e-05	1.4611e-05
Bra030569	Lactate/malate dehydrogenase family protein	0.0015906	0.00172807	0.00148338	0.00210394	0.00195017	0.00182225	0.00184579	0.00198994	0.00221879
Bra007179	delta 1-pyrroline-5-carboxylate synthase 2	2.13642e-06	1.9729e-06	1.99241e-06	0.000340933	0.000296862	1.66434e-06	0.000428853	0.000436898	0.00049774
Bra035087	photosystem II subunit R	0.00199694	0.00194655	0.00186233	0.0012071	0.00154156	0.00138283	0.00161264	0.00154275	0.00203083
Bra002922	microtubule-associated proteins 65-1	7.96502e-05	9.80719e-05	4.95206e-05	1.92586e-06	5.53382e-05	6.205e-05	1.83776e-06	2.17179e-06	2.20914e-06
Bra025480	6-phosphogluconate dehydrogenase family protein	0.000255142	2.94518e-06	2.97429e-06	0.000277608	0.000155106	0.000372682	2.20758e-06	2.60883e-06	2.65369e-06
Bra029574	root FNR 1	4.10894e-06	3.79445e-06	7.66391e-05	2.9805e-06	2.85475e-06	3.20099e-06	5.68831e-05	6.72222e-05	6.83782e-05
Bra006584	TCP-1/cpn60 chaperonin family protein	2.07644e-06	0.000441029	0.00029047	1.50619e-06	1.44264e-06	1.61761e-06	0.000244339	0.000356691	0.000224606
Bra014005	Inositol monophosphatase family protein	0.000829591	0.000808657	0.000730686	0.000735484	0.000672433	0.000610373	0.000574233	0.000490104	0.000651926
Bra011081	Class II aminoacyl-tRNA and biotin synthetases superfamily protein	0.000596701	0.000567238	0.000343707	0.00024824	0.000304829	0.000362309	0.000109331	0.000258407	0.000197138
Bra037761	photosystem I reaction center subunit PSI-N, chloroplast, putative / PSI-N, putative (PSAN)	0.00425275	0.0037565	0.00327632	0.00254832	0.00269774	0.00201662	0.00262373	0.00325187	0.00346164
Bra017143	Neutral/alkaline non-lysosomal ceramidase	2.07091e-06	1.9124e-06	1.9313e-06	3.00434e-05	2.87759e-05	1.6133e-06	5.73382e-05	3.388e-05	3.44626e-05
Bra036365	Thioredoxin superfamily protein	0.00230101	0.00192568	0.00241413	0.00250362	0.00319732	0.00263281	0.00199091	0.00158812	0.00203425
Bra016931	Embryo-specific protein 3, (ATS3)	8.48732e-06	7.83771e-06	7.91518e-06	0.000123129	0.000176901	6.61188e-06	0.000176244	0.000208279	0.00021186
Bra028568	Eukaryotic aspartyl protease family protein	3.25614e-06	3.00692e-06	3.03664e-06	7.08571e-05	2.26225e-06	2.53663e-06	0.000112693	7.99056e-05	8.12797e-05
Bra006248	Ribosomal protein S13/S18 family	0.00101094	0.00110331	0.000857088	0.000599979	0.000702369	0.000787557	0.000508919	0.000751775	0.000458821
Bra001123	pathogenesis-related 4	7.25784e-06	6.70234e-06	6.76859e-06	5.26462e-06	0.000151275	5.65409e-06	0.000200952	0.000178107	0.00018117
Bra002617	LOCATED IN: thylakoid, chloroplast thylakoid membrane, chloroplast, chloroplast envelope; EXPRESSED IN: 22 plant structures; EXPRESSED DURING: 13 growth stages; CONTAINS InterPro DOMAIN/s: Thylakoid soluble phosphoprotein TSP9 (InterPro:IPR021584); Has 37 Blast hits to 37 proteins in 10 species: Archae - 0; Bacteria - 0; Metazoa - 0; Fungi - 0; Plants - 37; Viruses - 0; Other Eukaryotes - 0 (sour…	1.5378e-05	0.00085206	1.43414e-05	0.000892378	0.000641046	0.000718797	1.06445e-05	1.25792e-05	1.27955e-05
Bra029928	ribosomal protein S11-beta	0.000683789	0.000631454	0.000637695	7.08571e-06	6.78676e-06	7.6099e-06	6.76158e-06	0.000878962	0.000325119
Bra015274	FASCICLIN-like arabinoogalactan 9	6.21272e-06	5.73721e-06	5.79391e-06	0.00018026	0.000215819	0.000193596	0.000172015	5.082e-06	5.16939e-06
Bra040448	Ribosomal protein L1p/L10e family	0.000962146	0.00105774	0.000598192	0.000830846	0.000795793	0.000928004	0.00044399	0.000599646	0.000419346
Bra000667	isoamylase 3	8.62877e-05	5.97626e-05	4.02355e-05	0.000109533	0.000119899	0.000151247	8.95909e-05	0.000123521	0.000107696
Bra013632	HSP70-interacting protein 1	0.000114204	3.51545e-06	3.55019e-06	8.28403e-05	0.00015869	8.89687e-05	2.63503e-06	3.11397e-06	3.16752e-06
Bra013517	photosystem II subunit QA	0.00177897	0.00227466	0.00312667	0.0038216	0.00351775	0.00287835	0.00156291	0.00184698	0.00210647
Bra006775	regulatory particle triple-A ATPase 3	0.00011917	3.66829e-06	3.70455e-06	0.00028814	0.000220787	0.000247565	0.000302455	0.000259949	0.000231366
Bra011099	profilin 1	0.00106707	0.000875909	0.00110571	0.000774019	0.000494242	0.000738916	0.000984816	0.00116382	0.000986524
Bra030114	unknown protein;	8.30577e-06	7.67006e-06	7.74587e-06	0.000120495	5.77056e-06	6.47045e-06	0.000172475	0.000135882	0.000138219
Bra008463	isopropylmalate dehydrogenase 2	0.000573835	0.000565242	0.000535152	0.000776985	0.00116946	0.000864267	0.000662002	0.00040681	0.000604793
Bra010320	Alkaline-phosphatase-like family protein	3.4592e-06	3.19444e-06	3.22601e-06	0.000100368	9.61332e-05	8.08446e-05	9.57765e-05	2.82962e-06	5.75656e-05
Bra021277	receptor-like kinase 902	7.37268e-05	9.07786e-05	4.58379e-05	3.56528e-05	1.70743e-06	7.65807e-05	1.70109e-06	2.01028e-06	2.04485e-06
Bra000853	GTP binding Elongation factor Tu family protein	0.000445725	0.000348285	0.000319752	0.000447667	0.000500243	0.000454074	0.000545852	0.000476788	0.00062763
Bra007317	eukaryotic translation initiation factor 3E	0.000140878	0.000162619	0.000131381	0.000229924	0.000293631	0.000192059	0.000243785	0.000230476	0.00017583
Bra000144	rubisco activase	0.00912288	0.0086662	0.0108865	0.00761363	0.00717882	0.00960338	0.00554521	0.0071148	0.00650255
Bra021175	nitrile specifier protein 1	5.99683e-06	5.53784e-06	5.59258e-06	8.69983e-05	4.16639e-06	4.67172e-06	8.30186e-05	0.000147162	9.97951e-05
Bra033851	Protein of unknown function (DUF760)	0.000116198	0.000107304	0.000144487	2.80955e-06	2.69101e-06	6.03478e-05	0.000107241	0.000126733	9.66843e-05
Bra002483	GTP binding Elongation factor Tu family protein	0.00359756	0.00389721	0.00306471	0.00353796	0.00365306	0.00334158	0.00399867	0.00483865	0.00474916
Bra040080	serine hydroxymethyltransferase 3	8.8082e-05	2.71135e-06	8.21443e-05	4.25946e-05	8.15951e-05	0.000114364	2.03231e-06	2.4017e-06	2.443e-06
Bra002878	FASCICLIN-like arabinogalactan 1	0.000145838	0.000303021	0.000136007	0.00031736	0.00027864	0.00045445	0.000100948	0.00014912	0.000151684
Bra034975	aldehyde oxidase 2	1.24854e-06	1.15298e-06	1.16437e-06	9.05649e-07	3.46976e-05	9.72648e-07	5.18533e-05	4.08521e-05	3.11659e-05
Bra018565	chloroplast RNA binding	0.00332824	0.00337706	0.00272069	0.00306991	0.00294039	0.00332903	0.00224688	0.00245361	0.00266675
Bra000895	secretion-associated RAS super family 2	8.04756e-06	0.000594529	7.50507e-06	0.00145936	0.0014537	0.00106578	0.00139261	0.0015799	0.00160706
Bra018338	ubiquitin-activating enzyme 1	0.000183224	0.000169201	0.000144585	0.000214693	0.000225219	0.000164697	0.000224384	0.00024211	0.000281455
Bra011843	alanine:glyoxylate aminotransferase 2	3.26298e-06	3.01324e-06	3.04302e-06	2.36686e-06	2.26701e-06	0.000101679	0.000180688	8.00735e-05	0.000135751
Bra017730	phospholipase D delta	5.55368e-05	6.83815e-05	6.90574e-05	6.71411e-05	2.57234e-05	0.000129795	0.000230651	0.000212002	0.000200244
Bra000687	ATP synthase delta-subunit gene	0.00252226	0.00275827	0.00278554	0.00361099	0.00373533	0.00279225	0.00238909	0.0021175	0.00265097
Bra037976	Dihydrolipoamide acetyltransferase, long form protein	2.87094e-06	2.6512e-06	2.67741e-06	2.08249e-06	7.97852e-05	2.23655e-06	5.96169e-05	9.39371e-05	0.000167217
Bra027184	Isochorismatase family protein	7.92438e-06	7.31787e-06	0.000221706	5.7481e-06	5.50559e-06	6.17334e-06	0.000109703	0.000194464	0.000263744
Bra023623	phosphoglucosamine mutase family protein	5.49798e-05	5.07717e-05	5.12736e-05	9.97016e-05	0.000171891	0.000128493	0.000171253	6.74602e-05	9.14936e-05
Bra040903	TRAF-like family protein	0.000325273	0.000225283	0.000151673	0.000589857	0.000338983	0.000411771	0.000478444	0.000432369	0.000575128
Bra013983	Thiamine pyrophosphate dependent pyruvate decarboxylase family protein	0.000162353	7.49635e-05	0.000100939	0.000235532	0.000225595	0.000189717	0.000187298	0.000154939	0.000180118
Bra038377	ATP synthase delta-subunit gene	0.00245588	0.00220662	0.00229033	0.00250362	0.00281303	0.00232687	0.00174587	0.00184603	0.00220914
Bra015656	nitrate reductase 1	3.49029e-05	6.4463e-05	8.13752e-05	1.26587e-06	1.21247e-06	5.43809e-05	1.20797e-06	1.42753e-06	1.45208e-06
Bra009349	unknown protein;	0.00013275	0.000204316	8.25344e-05	9.6293e-05	3.07434e-06	0.000137889	3.06294e-06	3.61966e-06	3.6819e-06
Bra004771	chitinase, putative	5.50773e-06	5.08618e-06	5.13645e-06	0.000279659	0.000918379	4.29069e-06	0.0008006	0.000405479	0.00087073
Bra023485	carbonic anhydrase 2	0.00533718	0.00520557	0.00581628	0.0050024	0.00604126	0.00513889	0.00427546	0.00441486	0.00474027
Bra022221	Late embryogenesis abundant protein (LEA) family protein	5.21201e-06	4.81309e-06	4.86067e-06	0.000226838	3.62112e-06	4.06032e-06	0.000396846	0.000255805	0.000173469
Bra008643	Ribosomal protein S7e family protein	0.000980955	0.000528427	7.62357e-06	0.00047437	0.000454356	0.000573146	5.65837e-06	6.68684e-06	6.80183e-06
Bra013540	oxidoreductase, zinc-binding dehydrogenase family protein	4.77901e-06	4.41324e-06	4.45686e-06	3.46655e-06	0.000132812	3.723e-06	0.000132319	0.000117277	0.000198823
Bra020043	Translation elongation factor EF1B/ribosomal protein S6 family protein	0.000483211	0.000446227	0.000257507	0.000250362	0.000287759	0.000376436	4.77818e-06	0.0001694	5.74376e-06
Bra018329	catalytics;transferases;[acyl-carrier-protein] S-malonyltransferases;binding	0.000566263	0.000634977	0.000414929	0.000352071	0.000337217	0.000409627	0.000279972	0.000397031	0.000302894
Bra031804	unknown protein;	7.61362e-06	7.03089e-06	7.10038e-06	0.000220907	0.000105794	5.93125e-06	0.000421604	0.000186838	0.000126701
Bra039681	glyoxalase II 3	6.36549e-06	5.87829e-06	5.93639e-06	0.000323213	4.42252e-06	4.95891e-06	0.00039655	0.000312418	0.00031779
Bra007610	Tyrosine transaminase family protein	0.000541475	0.000500032	0.000425241	0.000806211	0.000970195	0.000666041	0.00088769	0.000629422	0.0011145
Bra033856	pinoresinol reductase 1	4.89962e-06	4.52461e-06	4.56933e-06	0.000106621	3.40408e-06	3.81695e-06	0.000135658	8.01577e-05	0.000163072
Bra037892	Molybdenum cofactor sulfurase family protein	9.92446e-05	9.16487e-05	0.000138832	3.59945e-06	3.44759e-06	3.86573e-06	3.4348e-06	4.0591e-06	0.000123867
Bra011689	alpha/beta-Hydrolases superfamily protein	4.16402e-06	0.000153813	0.000155333	9.06135e-05	8.67905e-05	9.7317e-05	2.88228e-06	3.40617e-06	3.46474e-06
Bra014468	N-terminal nucleophile aminohydrolases (Ntn hydrolases) superfamily protein	6.96493e-06	6.43185e-06	6.49542e-06	0.000505214	0.000435509	0.000325554	0.000433893	5.69731e-06	0.000405669
Bra010574	aminopeptidase P1	2.42684e-06	2.2411e-06	2.26325e-06	1.76036e-06	0.000118026	1.89058e-06	0.00010079	0.000138961	0.000121158
Bra019940	Glutathione S-transferase family protein	6.8422e-06	6.31851e-06	6.38096e-06	9.92623e-05	9.50744e-05	5.33028e-06	9.47217e-05	0.000111938	0.000113863
Bra039059	Peroxidase superfamily protein	4.76435e-06	4.3997e-06	4.44319e-06	6.91183e-05	3.31011e-06	3.71158e-06	6.59565e-05	7.79448e-05	7.92851e-05
Bra015164	unknown protein;	1.25256e-05	1.15669e-05	1.16813e-05	0.000181714	8.70238e-06	9.75786e-06	0.000173402	0.000204919	0.000208443
Bra015779	Dehydrin family protein	7.96502e-06	7.35539e-06	7.42809e-06	0.00040443	0.000332029	0.00043435	5.51329e-06	0.000390923	6.62742e-06
Bra016372	RAB GTPase homolog G3B	4.45037e-06	4.10975e-06	4.15037e-06	0.000161408	3.09196e-06	0.000104009	0.000215634	0.00018202	0.00011109
Bra005347	Single hybrid motif superfamily protein	0.000280695	0.000172807	0.000174515	6.78691e-06	6.50057e-06	7.289e-06	0.000259058	7.65361e-06	7.78522e-06
Bra029906	chlorsulfuron/imidazolinone resistant 1	0.000119109	0.000131991	4.44319e-05	1.72796e-06	4.96516e-05	0.000129905	1.64891e-06	1.94862e-06	1.98213e-06
Bra028243	HIS HF	2.65501e-06	2.4518e-06	2.47603e-06	5.77758e-05	5.53382e-05	6.205e-05	5.51329e-05	2.17179e-06	6.62742e-05
Bra011366	Sec23/Sec24 protein transport family protein	1.42363e-06	1.31467e-06	1.32766e-06	2.06531e-05	2.96726e-05	2.2181e-05	9.85418e-07	2.32906e-05	1.18455e-06
Bra028345	S-adenosyl-l-homocysteine (SAH) hydrolase 2	3.20243e-06	2.95732e-06	2.98655e-06	0.00150991	0.00153521	0.00127234	2.21668e-06	0.00136219	0.00170537
Bra035791	trigalactosyldiacylglycerol2	7.99577e-05	5.53784e-05	9.32097e-05	1.44997e-06	1.3888e-06	3.11448e-05	2.76729e-05	3.27027e-05	6.65301e-05
Bra021810	26S proteasome regulatory complex, non-ATPase subcomplex, Rpn2/Psmd1 subunit	1.54699e-06	1.42859e-06	7.21354e-05	0.000112214	0.000128975	9.64123e-05	0.000149913	0.00020247	0.000141592
Bra018420	translation initiation factor 3 subunit H1	0.000230442	8.51218e-05	0.000128945	6.68622e-05	3.20206e-06	3.59043e-06	0.000127607	0.000188501	7.66972e-05
Bra003918	Peroxidase superfamily protein	4.29055e-06	3.96216e-06	0.000160053	0.000342345	0.000238474	0.000233973	0.000326685	0.000245677	0.000464103
Bra027544	tubulin beta chain 4	3.49029e-06	3.22315e-06	3.25501e-06	2.53175e-06	2.42493e-06	0.00261028	0.00190859	0.00199854	0.00261374
Bra002259	Mitochondrial substrate carrier family protein	0.0011394	0.00143984	0.00111852	0.000739485	0.0010416	0.000700757	0.00112075	0.00107919	0.00109775
Bra002092	VPS35 homolog A	1.97104e-06	1.82018e-06	1.83817e-06	2.85946e-05	1.36941e-06	7.6775e-05	9.5503e-05	4.83693e-05	4.9201e-05
Bra010332	HAD superfamily, subfamily IIIB acid phosphatase	5.90562e-06	5.45362e-06	5.50752e-06	8.56751e-05	0.000205151	4.60066e-06	0.000327024	9.6616e-05	0.000147416
Bra002245	aspartate aminotransferase 2	0.000345151	0.000177074	0.00014306	0.000305998	0.000426309	0.000358511	0.000557455	0.000376444	0.000606286
Bra009101	Chalcone-flavanone isomerase family protein	7.57648e-06	6.99659e-06	7.06575e-06	0.000109915	5.26388e-06	0.000118046	0.000104887	0.000185927	0.000126083
Bra028586	G-box regulating factor 6	0.0032758	0.00281645	0.00289696	0.00237616	0.00286451	0.00255195	0.00242384	0.0019404	0.00239672
Bra024759	glutamine-tRNA ligase, putative / glutaminyl-tRNA synthetase, putative / GlnRS, putative	4.27284e-05	5.91871e-05	5.97722e-05	1.54969e-06	1.48431e-06	3.32868e-05	4.43641e-05	8.73796e-05	5.33293e-05
Bra006208	magnesium-chelatase subunit chlH, chloroplast, putative / Mg-protoporphyrin IX chelatase, putative (CHLH)	8.9909e-05	0.000124541	3.14431e-05	8.15215e-07	7.80821e-07	7.87972e-05	7.77924e-07	9.1932e-07	9.35128e-07
Bra008723	voltage dependent anion channel 3	0.00073157	0.000831479	0.000682254	0.000775577	0.000625562	0.000789114	0.000895909	0.000920652	0.00103013
Bra018019	AMP-dependent synthetase and ligase family protein	3.02175e-06	2.79047e-06	2.81805e-06	0.000219188	0.000146958	2.35404e-06	0.000230078	9.88716e-05	0.000226286
Bra010169	non-intrinsic ABC protein 6	3.25614e-06	3.00692e-06	9.10993e-05	2.3619e-06	2.26225e-06	2.53663e-06	4.50772e-05	5.32704e-05	8.12797e-05
Bra023072	Enolase	0.00206391	0.00171212	0.00169642	0.0023852	0.00213875	0.00234364	0.00227609	0.0021175	0.00267784
Bra007025	actin 3	4.11984e-06	3.80451e-06	3.84212e-06	2.9884e-06	0.00080145	0.000577707	0.000655891	0.000404403	0.000822714
Bra035349	2-phosphoglycolate phosphatase 1	0.000995073	0.000998817	0.00141217	0.00122391	0.00102198	0.00111223	0.000748671	0.000813969	0.000863965
Bra034763	Amino acid dehydrogenase family protein	0.0002606	0.000144393	0.000243033	0.00030245	0.000470746	0.000487238	0.000360769	0.000341074	0.000303571
Bra032004	UDP-GLUCOSE PYROPHOSPHORYLASE 1	0.000715751	0.000793162	0.000667502	0.000856652	0.00101942	0.000920027	0.00118904	0.000848951	0.00131021
Bra027485	Lactate/malate dehydrogenase family protein	0.00149704	0.00172807	0.00139612	0.00210394	0.00211269	0.00174936	0.0020077	0.00176033	0.00206308
Bra027582	2-oxoglutarate dehydrogenase, E1 component	1.52422e-06	1.40756e-06	1.42147e-06	0.000110562	7.41282e-05	8.31189e-05	1.05505e-06	1.24681e-06	0.00010146
Bra020541	TRAF-like family protein	4.42501e-06	4.08633e-06	4.12672e-06	0.000353074	0.000368921	0.00031025	0.000459441	3.61966e-06	0.000441828
Bra041120	ATP synthase subunit alpha	0.00147922	0.00176442	0.00175312	0.00214596	0.00244081	0.0019446	0.00166383	0.00194104	0.00176928
Bra005019	rubisco activase	0.0066378	0.00670347	0.00841642	0.00609565	0.00604293	0.00782026	0.0044588	0.00569719	0.00497894
Bra023417	unknown protein;	0.000934243	0.000733327	0.000718794	0.000830147	0.000892485	0.00109171	0.00134184	0.00106989	0.00108829
Bra014562	ketol-acid reductoisomerase	2.63698e-06	0.000852301	2.45922e-06	0.000401684	0.00045802	0.000472486	1.82528e-06	2.15705e-06	2.19414e-06
Bra002918	homolog of bacterial cytokinesis Z-ring protein FTSZ 1-1	0.000151161	0.000209387	0.000176214	2.74119e-06	2.62554e-06	0.000235518	2.61579e-06	3.09124e-06	3.1444e-06
Bra027030	Glycosyl hydrolases family 32 protein	2.37489e-06	2.19312e-06	2.2148e-06	5.16802e-05	1.64999e-06	1.85011e-06	4.93161e-05	3.88532e-05	5.9282e-05
Bra007655	rotamase CYP 4	0.00265914	0.00251142	0.00264897	0.0030248	0.00344303	0.00306025	0.00351392	0.00286728	0.00296687
Bra000875	glutathione S-transferase F3	7.29192e-06	6.73381e-06	6.80037e-06	0.000105787	0.000354632	0.000170419	5.04738e-06	5.96479e-06	0.000182021
Bra012747	alpha/beta-Hydrolases superfamily protein	9.4132e-05	4.34637e-06	4.38933e-06	0.000136561	0.000130799	7.33318e-05	0.00022805	0.000154	0.00019581
Bra010347	Enoyl-CoA hydratase/isomerase family	2.11605e-06	1.95409e-06	1.9734e-06	0.000107444	8.82094e-05	9.8908e-05	0.000161117	0.000103856	1.76069e-06
Bra008831	Aldolase-type TIM barrel family protein	0.0001769	0.000228704	6.59899e-05	0.000384952	0.00034413	0.000551241	0.000269385	0.000463052	0.000500453
Bra010350	Photosystem I reaction centre subunit IV / PsaE protein	0.00434456	0.00361083	0.00425427	0.00338776	0.00249022	0.00245379	0.00323279	0.00382038	0.00442832
Bra038162	20S proteasome beta subunit G1	0.000316975	0.0004098	0.000413851	0.000413863	0.000704715	0.000493867	0.000614338	0.000726	0.000580237
Bra031675	ATP binding;leucine-tRNA ligases;aminoacyl-tRNA ligases;nucleotide binding;ATP binding;aminoacyl-tRNA ligases	0.000241844	0.000285371	0.000238072	0.000224156	0.000233368	0.00027214	0.000186002	0.00021981	0.000178872
Bra028278	phosphoglucomutase	0.000296786	0.000433945	0.000461299	0.000574078	0.000498308	0.000539479	0.000393744	0.000343925	0.000288103
Bra010751	phytoene desaturase 3	0.000167308	0.000180253	0.00015603	0.000101134	0.000135613	0.000130338	0.000173713	0.000136858	0.000162413
Bra000947	unknown protein;	0.00189412	0.00218644	0.00141315	0.00109915	0.000986977	0.00125424	0.00137664	0.00123951	0.00173364
Bra010528	phosphoserine aminotransferase	0.000286961	0.000298123	0.000267617	0.000130096	0.000199371	0.000223552	0.000248289	0.000264076	0.00032831
Bra003597	nudix hydrolase homolog 3	0.000102452	7.56887e-05	5.73276e-05	0.000104042	0.000227777	9.57763e-05	0.000226932	0.000150851	0.000238692
Bra010097	aldehyde dehydrogenase 12A1	2.83945e-06	5.24425e-05	2.64804e-06	6.17895e-05	5.91825e-05	6.63606e-05	9.82716e-05	6.96801e-05	0.00011813
Bra001444	LYR family of Fe/S cluster biogenesis protein	0.000467121	0.000647053	0.000326724	0.000847088	0.00048681	0.000363902	8.08339e-06	9.55263e-06	0.000291507
Bra017633	Cyclase family protein	5.99683e-06	5.53784e-06	0.000111852	0.000130497	0.000166656	0.000140151	0.000166037	0.000147162	0.000349283
Bra001747	D-3-phosphoglycerate dehydrogenase	0.000211677	0.000244344	0.000172732	0.000153544	0.000183832	0.000123677	0.00010989	2.16439e-06	2.20161e-06
Bra021412	Ribonuclease E inhibitor RraA/Dimethylmenaquinone methyltransferase	9.3565e-06	8.64037e-06	8.72577e-06	0.000203607	0.000130011	7.289e-06	0.000129529	0.000153072	0.000155704
Bra003231	alpha-soluble NSF attachment protein 2	0.000322459	0.000347409	0.000150361	0.000116951	0.000149356	0.000125603	0.000260403	0.000263772	0.000491897
Bra016989	Uroporphyrinogen decarboxylase	0.000477901	0.000698762	0.000519967	0.000288879	0.000221353	0.000465375	0.000248098	0.000162885	0.000331371
Bra018372	thiaminC	0.00024043	0.000222028	6.72668e-05	1.74401e-06	0.000133634	0.000318414	1.66423e-06	1.96672e-06	2.00054e-06
Bra039513	NAD(P)-binding Rossmann-fold superfamily protein	5.92816e-06	5.47443e-06	0.000165856	0.000129003	8.23737e-05	9.23645e-05	4.1034e-06	4.84924e-06	4.93262e-06
Bra015665	PDI-like 1-2	0.000335657	0.000225431	0.000256116	0.000332012	0.000657209	0.000380346	0.000675892	0.000424332	0.000660138
Bra035416	pyruvate dehydrogenase complex E1 alpha subunit	0.00015971	0.000221229	0.000223416	0.000231697	0.000332883	0.000311047	0.000276373	0.000293946	0.000299001
Bra003176	Ribosomal protein L17 family protein	0.00037336	0.000275827	0.000208915	0.000162494	0.000103759	0.000174516	0.000206748	0.00036649	0.00031066
Bra016084	PATELLIN 1	0.000779373	0.00077113	0.000882585	0.000545142	0.000580159	0.00062884	0.000597273	0.000546452	0.000787452
Bra000808	AAA-type ATPase family protein	2.17532e-06	2.00883e-06	4.05736e-05	4.73373e-05	6.04535e-05	5.08393e-05	4.51719e-05	7.11765e-05	0.000108601
Bra022161	Mannose-binding lectin superfamily protein	0.00013806	0.000478101	0.000128754	0.000901302	0.000647457	0.000779761	0.00155291	0.0004235	0.000775408
Bra016238	Thiamin diphosphate-binding fold (THDP-binding) superfamily protein	3.88295e-06	3.58575e-06	3.6212e-06	8.44971e-05	5.39547e-05	0.000120997	8.06318e-05	0.00012705	3.23087e-06
Bra027928	Protein of unknown function, DUF538	1.00205e-05	9.25356e-06	9.34502e-06	0.000218057	0.000278476	0.000234189	0.000416164	8.19677e-06	0.000250132
Bra005775	Pyridine nucleotide-disulphide oxidoreductase family protein	0.000107116	6.59449e-05	0.00019979	0.000258995	0.000297681	0.000166893	0.000346006	0.000233655	0.000415928
Bra008152	Pyridine nucleotide-disulphide oxidoreductase family protein	0.00106656	0.00123116	0.000714914	0.000894533	0.000764166	0.00116843	0.00036913	0.000545279	0.000665586
Bra017693	catalase 2	0.000896681	0.00106464	0.000985563	0.0011847	0.00113472	0.0011476	0.00104184	0.000995443	0.00111915
Bra035565	homolog of bacterial cytokinesis Z-ring protein FTSZ 1-1	4.27873e-06	3.95124e-06	3.9903e-06	9.31097e-05	8.91814e-05	3.33326e-06	5.92337e-05	7e-05	0.000106806
Bra039666	Class I glutamine amidotransferase-like superfamily protein	7.90422e-05	3.64962e-06	3.6857e-06	0.000143337	0.000192205	9.23645e-05	0.000300916	6.46565e-05	0.000164421
Bra017231	Enolase	0.0018599	0.00165728	0.00155194	0.00213018	0.00194963	0.00213525	0.00214567	0.00184169	0.00233491
Bra009713	LOCATED IN: mitochondrion, chloroplast thylakoid membrane, chloroplast, plastid, chloroplast envelope; EXPRESSED IN: 24 plant structures; EXPRESSED DURING: 14 growth stages; CONTAINS InterPro DOMAIN/s: S-layer homology domain (InterPro:IPR001119); BEST Arabidopsis thaliana protein match is: unknown protein (TAIR:AT5G52410.2); Has 1807 Blast hits to 1807 proteins in 277 species: Archae - 0; Bacter…	3.333e-05	7.69475e-05	3.10832e-05	1.20883e-06	1.15783e-06	2.59651e-05	2.30706e-05	6.81599e-05	5.54655e-05
Bra000974	plasma membrane intrinsic protein 1;4	0.00113253	0.00124505	0.00150883	0.00078238	0.000412154	0.000882273	0.00134386	0.00101464	0.00103208
Bra037675	HARMLESS TO OZONE LAYER 1	0.000274899	0.000190394	0.000192276	0.000249254	0.000429728	0.000267693	0.000428134	0.000337301	0.000400284
Bra017055	rubisco activase	0.00844957	0.00812663	0.0109862	0.00691744	0.00682046	0.0093138	0.0054604	0.00676835	0.00609708
Bra000294	Phosphoenolpyruvate carboxylase family protein	6.49866e-05	3.00063e-06	3.03029e-06	7.07088e-05	4.51504e-05	7.59398e-05	0.000134949	7.97385e-05	0.000216292
Bra022920	2-oxoglutarate (2OG) and Fe(II)-dependent oxygenase superfamily protein	8.19619e-05	0.000113533	0.000267529	0.00032699	0.000142361	0.000191553	2.83665e-06	3.35224e-06	0.000102297
Bra018695	cell wall / vacuolar inhibitor of fructosidase 1	9.70737e-06	8.96439e-06	9.05299e-06	0.000422485	0.000472104	7.56234e-06	0.000268773	0.000317625	0.000323087
Bra012077	gamma carbonic anhydrase 3	0.000122781	0.000113384	0.000114504	8.90615e-05	4.2652e-06	4.78251e-06	0.000127481	0.000100435	0.000153243
Bra010243	N-terminal nucleophile aminohydrolases (Ntn hydrolases) superfamily protein	0.00046662	0.000492464	0.000372999	0.000241766	0.000370505	0.000311581	0.000461413	0.000872446	0.00049919
Bra037859	stromal ascorbate peroxidase	0.000350012	0.000323223	0.000326418	0.000349096	0.000455956	0.000340838	0.000302843	0.000214732	0.000145617
Bra001661	S-adenosylmethionine synthetase family protein	0.000790422	0.000693428	0.000552854	0.000458678	0.000933568	0.00083128	2.7356e-06	0.000420267	3.28841e-06
Bra023598	nitrilase 2	0.00081271	0.00100068	0.00105267	0.00121178	0.00210173	0.00147729	0.00218769	0.00125573	0.00191598
Bra012157	Subtilase family protein	6.13097e-05	9.4362e-05	3.81179e-05	7.41202e-05	8.51917e-05	9.55243e-05	0.000155605	0.000150454	0.000102027
Bra030588	vesicle-associated membrane protein 721	7.09214e-06	6.54932e-06	6.61406e-06	0.000154333	0.000147821	0.000221	4.90909e-06	0.000232055	5.90113e-06
Bra006519	ARM repeat superfamily protein	1.39299e-06	1.28637e-06	5.19634e-05	9.09386e-05	6.77459e-05	7.59625e-05	5.78524e-05	7.97623e-05	6.95433e-05
Bra008130	Cyclophilin-like peptidyl-prolyl cis-trans isomerase family protein	4.85368e-06	8.96439e-05	4.5265e-06	0.000105621	0.000168609	0.000113435	0.00010079	0.000119109	0.000121158
Bra033901	ATP sulfurylase 1	0.000135353	0.000156242	0.000126229	0.000196362	0.000141058	0.000289972	0.000117112	2.76797e-06	2.81557e-06
Bra035119	aldehyde dehydrogenase 5F1	8.79158e-05	0.000135311	0.000218638	0.000212571	0.000183243	0.000114149	0.000324556	0.000359575	0.000268223
Bra011232	Cytosol aminopeptidase family protein	0.000879158	0.000738063	0.000695667	0.00104353	0.000869939	0.00101696	0.000903593	0.000871698	0.000953189
Bra016816	CLP protease proteolytic subunit 6	0.000287626	0.000265611	0.000321884	0.000417269	0.000559531	0.000448139	0.000318546	0.000517611	0.000335053
Bra031978	polyribonucleotide nucleotidyltransferase, putative	1.79351e-06	1.65624e-06	1.67261e-06	7.80573e-05	1.24607e-06	0.000125748	4.96578e-05	0.000190722	5.96927e-05
Bra033054	ATPase, V0/A0 complex, subunit C/D	4.42501e-06	4.08633e-06	4.12672e-06	0.000128391	0.000184461	6.89444e-05	0.000214406	3.61966e-06	0.000147276
Bra000355	Ras-related small GTP-binding family protein	7.46721e-06	6.89568e-06	6.96384e-06	0.000649977	0.000363157	0.000407203	5.16871e-06	6.10817e-06	0.000745585
Bra003564	P-loop containing nucleoside triphosphate hydrolases superfamily protein	0.00081212	0.000656216	0.000662703	0.00046636	0.000423174	0.000738111	0.000491872	0.000387516	0.00039418
Bra016017	P-loop containing nucleoside triphosphate hydrolases superfamily protein	7.37852e-05	0.000102207	0.000172028	8.02823e-05	0.000102527	0.000172443	7.66098e-05	3.01781e-06	3.06971e-06
Bra018090	aldehyde dehydrogenase 2B4	0.000259343	0.000266104	0.000456849	0.000313533	0.000380386	0.000426522	0.000578435	0.000565714	0.000479535
Bra024068	Class I glutamine amidotransferase-like superfamily protein	6.21272e-06	5.73721e-06	5.79391e-06	4.50651e-06	4.31638e-06	0.000290394	0.000258022	0.00020328	0.000155082
Bra012230	Dehydrin family protein	7.0599e-06	0.000130391	6.58399e-06	0.000460893	0.000147149	0.000164996	9.77356e-05	0.0003465	0.000352458
Bra017182	arginine biosynthesis protein ArgJ family	3.31168e-06	6.11642e-05	3.08844e-06	7.20657e-05	4.60168e-05	7.73971e-05	9.16922e-05	0.000108358	8.26661e-05
Bra021942	thioredoxin O1	8.00608e-06	7.39331e-06	0.000149328	0.000232294	0.00016687	0.00012474	0.000277085	0.000196469	0.000199847
Bra028268	SH3 domain-containing protein	1.30629e-06	1.20631e-06	1.21823e-06	1.89508e-05	1.81513e-05	4.07056e-05	1.8084e-05	5.34272e-05	1.08692e-06
Bra021132	phospholipase D alpha 1	0.000497323	0.000388604	0.000267576	0.00052724	0.000598021	0.000610948	0.000635522	0.000547629	0.000525215
Bra040027	HEAT SHOCK PROTEIN 89.1	0.000270454	0.000178396	0.000162143	0.000140128	1.34216e-06	1.50494e-06	0.000160461	0.000221231	0.000192888
Bra031870	Ribosomal L29 family protein	0.0018713	0.00190088	0.00139612	0.00149312	0.00091008	0.00087468	0.000906703	0.000765361	0.00124564
Bra000955	MAP kinase 4	4.16402e-06	3.84531e-06	3.88332e-06	0.000120818	0.000202511	6.4878e-05	2.88228e-06	0.000170308	0.000138589
Bra019807	N-terminal nucleophile aminohydrolases (Ntn hydrolases) superfamily protein	5.66854e-06	5.23468e-06	5.28642e-06	4.11178e-06	3.9383e-06	0.000264958	0.000156948	0.000231843	0.000141498
Bra029278	carboxyesterase 20	4.82354e-06	4.45435e-06	0.000179935	0.000174942	0.000402147	0.000112731	0.000267103	0.000276196	0.000441485
Bra004875	Tetratricopeptide repeat (TPR)-like superfamily protein	0.000776589	0.000782346	0.000592559	0.000512103	0.000441448	0.000549988	0.000586413	0.00063525	0.000822403
Bra020562	lon protease 1	1.41584e-06	1.30748e-06	1.3204e-06	1.02701e-06	3.93471e-05	3.30895e-05	1.96006e-05	2.31632e-05	3.53422e-05
Bra019738	fumarylacetoacetase, putative	3.67182e-06	3.39078e-06	3.4243e-06	0.000133171	0.000153063	2.86046e-06	0.000101663	6.00709e-05	9.16558e-05
Bra022369	NAD(P)-binding Rossmann-fold superfamily protein	0.000531414	0.000379209	0.000473065	0.0002453	0.000285297	0.000301082	0.000200639	0.00037542	0.000321579
Bra017165	NAD(P)-binding Rossmann-fold superfamily protein	0.00104177	0.000962032	0.00114818	0.00123654	0.00121727	0.00118046	0.00117998	0.00112331	0.00126083
Bra002524	Ribosomal protein S8 family protein	0.00131423	0.000882647	0.000668529	0.000519982	0.000747066	0.000651525	0.000992392	0.00117277	0.00119294
Bra015491	acyl-CoA oxidase 3	2.30101e-06	2.12489e-06	4.29179e-05	3.33816e-05	3.19732e-05	5.37766e-05	6.37091e-05	7.52889e-05	5.74376e-05
Bra025162	protein phosphatase 2A subunit A2	2.01712e-06	1.86273e-06	1.88114e-06	1.46315e-06	7.00711e-05	1.5714e-06	5.58489e-05	3.3e-05	5.03512e-05
Bra030822	alpha/beta-Hydrolases superfamily protein	0.000296495	0.000210617	0.000361588	0.000198525	0.000126766	0.000213211	0.000252591	0.00041044	0.000360567
Bra011076	Enoyl-CoA hydratase/isomerase family	0.000150585	9.93284e-05	4.01241e-05	0.000140438	0.000179351	0.000167586	0.000253138	0.000211163	0.000214795
Bra020538	catalytics;carbohydrate kinases;phosphoglucan, water dikinases	1.34942e-06	1.24614e-06	1.25845e-06	9.78825e-07	7.50023e-05	6.30742e-05	3.7362e-05	4.41529e-05	3.36841e-05
Bra027021	Translation elongation factor EFG/EF2 protein	0.000901846	0.000888342	0.000691532	0.000610559	0.000918971	0.00113972	0.000499397	0.000573774	0.00055029
Bra008025	Kunitz family trypsin and protease inhibitor protein	0.000295844	0.0002732	6.89752e-06	0.00193136	0.00118187	0.000576178	0.00266213	0.001089	0.00166159
Bra031147	photosystem II reaction center PSB29 protein	0.000524723	0.000581474	0.000587221	0.000723173	0.000911398	0.00065404	0.000435848	0.000472145	0.000654906
Bra004915	FASCICLIN-like arabinogalactan protein 8	0.000672049	0.000758525	0.000522288	0.00102913	0.000985712	0.000901664	0.000671932	0.00036649	0.000683453
Bra003767	glycine-tRNA ligases	0.00010414	9.61697e-05	5.54973e-05	0.000129497	0.000144706	0.000197026	0.000113276	0.000158204	0.000111409
Bra014305	Insulinase (Peptidase family M16) protein	0.000123759	0.000257146	0.000201979	0.000336642	0.000429918	0.000289237	0.000406907	0.000278396	0.000283184
Bra022742	thiazole biosynthetic enzyme, chloroplast (ARA6) (THI1) (THI4)	0.00142412	4.10975e-06	0.000747066	9.68448e-05	0.000309196	0.000901414	3.08049e-06	3.6404e-06	3.703e-06
Bra028006	Leucine-rich repeat (LRR) family protein	0.000226978	8.9831e-05	0.000393115	0.000611531	0.00058573	0.000555729	0.000561112	0.000344812	0.000512622
Bra004275	hydroxypyruvate reductase	0.00185094	0.00237812	0.00270183	0.00236417	0.00229238	0.00275849	0.00206106	0.0015799	0.0015401
Bra008880	Protein of unknown function (DUF3411)	5.52733e-06	5.10428e-06	5.15473e-06	0.000160374	0.000115206	0.000215298	0.000306076	4.52135e-06	0.000413919
Bra011035	prohibitin 1	0.000321347	4.94587e-06	4.99475e-06	0.000388492	0.000334892	0.000417233	0.000296577	0.000481914	0.000490201
Bra004134	cytosolic NADP+-dependent isocitrate dehydrogenase	0.00109326	0.00111402	0.00126566	0.00142196	0.00185961	0.00138031	0.00146129	0.00123349	0.00128607
Bra026984	Glycosyl hydrolases family 32 protein	0.000270118	0.000270231	0.000230917	0.000702101	0.000516089	0.000315645	0.000576498	0.000405087	0.000355864
Bra019950	dynamin-like protein 6	0.000115785	0.000137473	9.25545e-05	1.19982e-06	0.000103428	1.28858e-06	9.15946e-05	0.000189425	0.000165156
Bra010775	Early-responsive to dehydration stress protein (ERD4)	0.000257789	0.00021822	0.000320548	0.000280488	0.000119402	0.000217561	0.000312267	0.000439315	0.000607743
Bra025079	CLP protease P4	0.000755017	0.00069723	0.000502944	0.000821499	0.00127393	0.00105032	0.00082125	0.000749948	0.000583351
Bra037560	actin 2	0.00153998	0.00138148	0.0016003	0.00169154	0.00186472	0.00181668	0.00173598	0.00172759	0.00219662
Bra034214	Thioredoxin superfamily protein	0.00135059	0.00132517	0.00094466	0.00116337	0.00105564	0.00111791	0.000642718	0.00103573	0.000702363
Bra014433	photosystem I light harvesting complex gene 2	0.00200214	0.00207301	0.00288564	0.00365274	0.00337217	0.00297767	0.0029397	0.00208441	0.00222122
Bra040607	Inositol monophosphatase family protein	2.62361e-06	2.42281e-06	4.89351e-05	7.61235e-05	7.29118e-05	4.08775e-05	5.4481e-05	4.29223e-05	6.54906e-05
Bra007832	translation initiation factor 3B1	6.52596e-05	0.000100441	6.08604e-05	0.000157791	9.06802e-05	0.000118625	0.000105401	0.000195735	0.000144801
Bra013314	P-loop containing nucleoside triphosphate hydrolases superfamily protein	0.000844518	0.000847696	0.000376673	0.000239708	0.000357147	0.000543487	0.000127079	0.000390461	9.16558e-05
Bra033534	importin alpha isoform 2	0.000117221	2.70623e-06	2.73298e-06	0.000106286	0.000183243	0.000182638	0.000101424	9.58868e-05	0.000243839
Bra006933	ubiquitin E2 variant 1D-4	1.06382e-05	9.82398e-06	9.92109e-06	0.000154333	0.000147821	0.00016575	7.36364e-06	0.000261062	8.85169e-06
Bra002306	Glutaredoxin family protein	1.17665e-05	1.08659e-05	0.000219466	0.000256052	0.000245249	0.000183329	0.000162893	0.000385	0.00039162
Bra006013	ATP synthase alpha/beta family protein	2.80357e-06	0.00251132	2.61458e-06	0.00286741	0.00315548	0.0030577	0.00285268	0.00293545	0.002706
Bra031555	Pleckstrin homology (PH) domain superfamily protein	0.000476853	0.00062908	0.000444708	4.94135e-06	4.73287e-06	0.000318414	0.000188612	0.000167171	0.000453455
Bra014816	glycoside hydrolase family 2 protein	4.22059e-05	3.89756e-05	3.93608e-05	4.08198e-05	3.90976e-05	2.19198e-05	5.84289e-05	4.60326e-05	8.19423e-05
Bra028124	NADH-ubiquinone dehydrogenase, mitochondrial, putative	0.000333121	0.000307625	0.000194166	0.000347352	0.000376092	0.000373048	0.000360285	0.000510925	0.000433092
Bra001525	Root hair defective 3 GTP-binding protein (RHD3)	9.64707e-05	0.000178174	8.99676e-05	0.000125958	6.70245e-05	0.000150307	1.33552e-06	1.57826e-06	9.6324e-05
Bra027670	monodehydroascorbate reductase 6	0.000610981	0.000623609	0.000809708	0.000886374	0.000804294	0.000926895	0.000779052	0.00078913	0.000695673
Bra016805	aspartic proteinase A1	0.000183808	2.829e-06	2.85696e-06	0.000177772	0.000212839	0.000167058	0.000339279	0.000150355	0.000229411
Bra024095	P450 reductase 2	2.32512e-06	2.14716e-06	2.16838e-06	1.68657e-06	4.84623e-05	0.000144907	3.21884e-05	5.70584e-05	5.80395e-05
Bra039708	O-acetylserine (thiol) lyase (OAS-TL) isoform A1	4.82354e-06	0.000846327	4.49838e-06	0.000944688	0.000904831	0.000789114	0.00100164	0.000868043	0.00104351
Bra014765	beta-hexosaminidase 1	2.82396e-06	2.60782e-06	2.6336e-06	4.09683e-05	7.84796e-05	4.39991e-05	0.000117283	2.31e-06	0.000140983
Bra034128	sulfite reductase	0.000365167	0.000359699	0.000431365	0.000476786	0.000304447	0.000455163	0.000269615	0.000238965	0.0003241
Bra036058	2-oxoglutarate (2OG) and Fe(II)-dependent oxygenase superfamily protein	4.67825e-06	8.64037e-05	4.36289e-06	6.78691e-05	9.75086e-05	0.000109335	6.47645e-05	0.000114804	0.000155704
Bra009005	Endomembrane protein 70 protein family	0.000131849	0.000133933	0.000110665	0.000124331	0.000128246	0.000123257	0.000164275	0.000183349	0.000131648
Bra017252	Tubulin/FtsZ family protein	0.000293053	0.000330761	0.000303664	0.000283428	0.000429828	0.000532693	0.000293002	0.000213082	0.000135466
Bra021879	Ribosomal protein S5 family protein	0.000977165	0.000902375	0.000623517	0.000596889	0.000643169	0.00052085	0.000605184	0.000631043	0.000641894
Bra018726	D-cysteine desulfhydrase	0.000292134	0.000359699	0.000454069	0.00056508	0.000541239	0.000531023	0.000640336	0.000398276	0.000526662
Bra026229	Sec14p-like phosphatidylinositol transfer family protein	0.000642292	0.000431369	0.000381179	0.000275304	0.00016227	0.000318414	0.000202085	0.000334342	0.000315799
Bra035786	endoribonuclease L-PSP family protein	8.26159e-06	0.000686634	7.70467e-06	0.000838978	0.000746183	0.000643603	0.000514671	0.0010137	0.000687419
Bra015520	photosystem II subunit P-1	0.00389771	0.0031631	0.00446109	0.00295579	0.00270799	0.00262238	0.00208478	0.00338156	0.00245693
Bra037669	Late embryogenesis abundant protein, group 2	0.000429733	0.000255113	0.000400765	0.000512103	0.000703758	0.000693464	0.000637406	0.00037663	0.000434188
Bra025984	alanine aminotransferas	0.000115693	0.000133548	0.000215788	0.00027274	0.000301423	0.000225321	0.000420427	0.000189274	0.000312859
Bra016282	Eukaryotic translation initiation factor 5A-1 (eIF-5A 1) protein	0.000683789	0.000541246	0.000637695	0.000708571	0.000678676	0.000228297	6.76158e-06	7.99056e-06	0.000487678
Bra018802	ARP protein (REF)	2.46928e-06	9.12116e-05	2.30283e-06	0.00012538	8.57786e-05	7.69459e-05	0.000102552	8.07949e-05	0.00010273
Bra029570	ubiquitin 11	0.00385757	0.00337483	0.00265081	0.00338725	0.00275063	0.00268883	0.00386471	0.00456716	0.00380102
Bra018226	Ribosomal protein S3 family protein	0.00168417	0.00161287	0.000988921	0.000904922	0.000953417	0.00111765	0.00151117	0.00137765	0.00150514
Bra025142	Chaperone protein htpG family protein	0.000828888	0.000947696	0.000515342	0.000529672	0.000562171	0.000891722	0.000273212	0.000516595	0.000377687
Bra026019	uridylyltransferase-related	5.48826e-06	0.000354774	5.1183e-06	0.000477722	0.000724481	0.000427553	0.000265924	0.000134682	0.000273996
Bra012716	unknown protein;	0.000435471	1.34047e-05	1.35372e-05	0.000421169	0.0004034	0.000339245	0.000602855	0.000593691	0.00036234
Bra015799	PAM domain (PCI/PINT associated module) protein	0.000290013	0.00032733	0.000240411	0.000280488	0.000425369	0.000401651	0.000490705	0.000369025	0.000428995
Bra002332	sucrose synthase 1	9.88027e-05	3.64962e-05	0.000128999	0.000157671	6.86447e-05	0.000123153	0.000287238	0.000177805	0.000230189
Bra035027	general regulatory factor 2	0.00280767	0.00275827	0.0026184	0.00199326	0.00273924	0.00251302	4.13497e-06	4.88654e-06	0.0026344
Bra003569	TOPLESS-related 1	4.27873e-05	1.31708e-06	1.3301e-06	5.17276e-05	3.96362e-05	2.22218e-05	6.91059e-05	4.66667e-05	4.74691e-05
Bra008695	UDP-glucose 6-dehydrogenase family protein	3.23579e-06	0.000537863	3.01766e-06	0.000469428	0.000382179	0.000403325	0.000559943	0.00063525	0.000700021
Bra036577	catalytics;carbohydrate kinases;phosphoglucan, water dikinases	6.55903e-05	6.05702e-05	4.89351e-05	3.80617e-05	4.55699e-05	7.15356e-05	9.08016e-07	5.36529e-05	1.09151e-06
Bra006107	NADP-malic enzyme 2	0.000475463	0.0003415	0.00061585	0.000843055	0.000991006	0.000699645	0.000786206	0.000583393	0.000439574
Bra013675	glutamate-cysteine ligase	0.000182369	0.00019648	0.000198422	0.00026457	0.000253408	0.000236786	0.000168312	0.000124315	0.000227615
Bra003991	ribosomal protein L34	0.000776589	0.000836676	0.000724239	0.000751085	8.99246e-06	1.00831e-05	0.000716727	0.00063525	0.000646174
Bra016811	glyoxalase I homolog	0.000219531	0.00025341	5.1183e-06	0.000716583	0.000571958	0.000598574	0.00110168	0.000852986	0.00109598
Bra013477	tripeptidyl peptidase ii	1.17844e-06	2.17648e-05	1.099e-06	8.54801e-07	5.73116e-05	9.18038e-07	8.15699e-05	0.000115675	8.82483e-05
Bra006879	acyl-CoA oxidase 4	3.53799e-06	3.2672e-06	9.89849e-05	0.000153981	2.45807e-06	2.75621e-06	0.000391833	0.000289408	0.000323823
Bra020124	chaperonin 20	0.00135059	0.00130391	0.00108779	0.00106874	0.000810387	0.000956501	0.000807381	0.00110478	0.000970537
Bra033232	K+ efflux antiporter 1	0.000152817	0.000179608	0.000103648	0.000131003	8.68681e-05	0.00016234	9.6162e-05	7.95483e-05	5.77973e-05
Bra020215	Alanyl-tRNA synthetase, class IIc	0.000256459	0.000355245	0.000254119	0.000127894	0.000311813	0.000224763	7.7664e-05	0.000209783	8.00215e-05
Bra024287	FK506-binding protein 12	0.000554707	0.000512251	0.000646642	0.000502959	0.000289043	0.000216067	0.000479951	0.000680625	0.000461553
Bra033140	glutathione peroxidase 6	6.78244e-06	6.26333e-06	0.000379514	0.000344384	0.00047122	0.000317024	0.000234736	0.000443843	0.000507909
Bra037506	nitrile specifier protein 5	4.82354e-06	4.45435e-06	0.000134951	0.000209931	0.000100537	3.75768e-06	0.000868086	0.000315652	0.000762565
Bra034927	glyceraldehyde-3-phosphate dehydrogenase B subunit	0.00578975	0.00550669	0.0053348	0.00432545	0.00469695	0.00507757	0.00458354	0.00518976	0.00548094
Bra025167	2-oxoacid dehydrogenases acyltransferase family protein	0.000358175	0.000360831	0.000273298	0.000448762	0.000384583	0.00048196	0.00031554	0.000399528	0.000352212
Bra001789	calmodulin-domain protein kinase 9	5.73129e-05	2.64631e-06	2.67247e-06	6.23595e-05	3.9819e-05	4.46485e-05	5.95069e-05	4.68819e-05	9.53762e-05
Bra024200	26S proteasome regulatory subunit S2 1B	0.000366069	0.000386344	0.000260108	0.000303469	0.000302776	0.000325919	0.00037405	0.000527592	0.000420629
Bra004101	PLC-like phosphodiesterase family protein	8.36166e-05	0.000173738	0.00011697	0.000212285	0.000261423	0.00016285	0.000144696	0.000102598	0.000139149
Bra037844	voltage dependent anion channel 2	0.000393922	0.00041574	0.000524811	0.000449018	0.000234586	0.000350717	0.000506384	0.000506359	0.000608714
Bra002733	H(+)-ATPase 3	1.63149e-06	1.50662e-06	0.000273872	0.000142012	0.00018136	0.000203357	0.000316203	0.000306948	0.000298652
Bra003054	ARM repeat superfamily protein	8.94688e-05	8.26211e-05	6.67502e-05	7.78775e-05	0.00012432	0.000111518	0.000136244	0.00010246	0.00011911
Bra037296	rotamase CYP 3	0.00299736	0.00310346	0.0026259	0.003426	0.0037863	0.00346718	0.00289206	0.00364061	0.00355207
Bra006553	Ribosomal protein S8e family protein	0.00171978	0.00193556	0.00125301	0.00140341	0.00141888	0.00138163	0.00178562	0.00189036	0.00196759
Bra018842	thioredoxin X	0.000597376	0.000551654	0.00047752	0.000371416	0.000415037	0.000465375	0.000236284	0.000488654	0.000284032
Bra003524	S-adenosyl-L-methionine-dependent methyltransferases superfamily protein	0.000599149	0.0009789	0.000687705	0.00060176	0.000480309	0.000610373	0.000414724	0.000490104	0.000575229
Bra019639	Aldolase superfamily protein	0.00212586	4.00643e-06	4.04603e-06	0.00163644	0.0017784	0.00148712	0.00174177	0.00184542	0.00216594
Bra032361	Transketolase family protein	0.000101184	0.00018688	0.000141545	0.00018349	0.000210898	0.000157651	0.000175096	4.13844e-06	4.2096e-06
Bra025088	Haloacid dehalogenase-like hydrolase (HAD) superfamily protein	0.000456817	0.000345153	0.000387294	0.000361485	0.000317381	0.00029117	0.00020122	0.000305735	0.000310993
Bra005345	Chitinase family protein	0.000249707	0.000230595	0.000558898	0.000434712	0.000798044	0.000389059	0.000207413	0.000163408	0.000290882
Bra034757	Nascent polypeptide-associated complex (NAC), alpha subunit family protein	7.61362e-06	0.000773398	7.10038e-06	0.000607495	0.000634762	0.000533812	0.000737808	0.000871912	0.000633503
Bra000929	60S acidic ribosomal protein family	0.000274899	0.000380788	0.000384552	0.000797612	0.000477476	0.000749542	9.51408e-06	0.000562168	1.14367e-05
Bra000567	Mog1/PsbP/DUF1795-like photosystem II reaction center PsbP family protein	0.00078642	0.000484152	0.000611172	0.00047537	0.000546377	0.00040843	0.000498987	0.000375253	0.000327176
Bra033446	Dihydrolipoamide acetyltransferase, long form protein	2.42306e-06	2.2376e-06	9.03887e-05	5.27283e-05	6.73382e-05	5.66291e-05	0.000100633	0.000118924	8.06457e-05
Bra041122	Photosystem I, PsaA/PsaB protein	0.000199125	0.000288962	0.000450991	0.000185708	0.000177873	0.000398893	0.000728542	0.000535192	0.000402379
Bra027431	TCP-1/cpn60 chaperonin family protein	2.99264e-06	0.000221087	2.7909e-06	0.000217077	0.00022871	0.000209822	0.000186432	0.000171358	0.000124504
Bra003029	haloacid dehalogenase-like hydrolase family protein	0.000119705	8.29076e-05	5.58181e-05	0.000173661	0.00022871	0.000139881	0.000165717	7.34393e-05	0.000124504
Bra033706	GroES-like zinc-binding dehydrogenase family protein	0.00040981	0.000454132	0.000267529	0.000683705	0.000683332	0.000446956	0.000510597	0.000435791	0.000443285
Bra016706	Ribosomal protein L16p/L10e family protein	0.000763858	0.000705394	0.000395759	0.000738772	0.000589669	0.000793426	5.87481e-06	6.94262e-06	0.000776821
Bra012238	catalase 3	0.00173628	0.00157423	0.001737	0.0021754	0.00247841	0.0017461	0.00192293	0.00198838	0.00194377
Bra003053	Tetratricopeptide repeat (TPR)-like superfamily protein	0.00070892	0.000535631	0.000781337	0.000373984	0.000447757	0.000251032	0.000356877	0.000790767	0.000536244
Bra029700	Phosphoglycerate mutase, 2,3-bisphosphoglycerate-independent	0.000554707	0.000486638	0.000206926	0.000583432	0.000712973	0.000561774	0.000921507	0.000703312	0.000692329
Bra003352	vacuolar ATP synthase subunit D (VATD) / V-ATPase D subunit / vacuolar proton pump D subunit (VATPD)	0.000357053	0.00027477	0.000499475	0.000388492	0.000413446	0.000509951	0.000453104	0.000681494	0.000742728
Bra022266	S-adenosyl-L-methionine-dependent methyltransferases superfamily protein	6.13905e-05	5.66918e-05	2.86261e-06	0.000155858	0.00010663	0.000239125	0.000148728	0.000100435	0.000204324
Bra010306	GDSL-like Lipase/Acylhydrolase superfamily protein	0.000221883	0.00024588	0.000124155	0.000354083	0.000277482	0.000207424	0.00049147	0.0002541	0.000480015
Bra008826	ADP/ATP carrier 2	0.000916084	0.000999781	0.000776664	0.00105716	0.00107042	0.00107049	2.88228e-06	0.0013284	3.46474e-06
Bra020801	neurofilament protein-related	0.000421405	0.000416948	0.000392998	0.000196505	0.000104563	0.000187593	2.08351e-06	7.38663e-05	0.000125227
Bra018893	Plastid-lipid associated protein PAP / fibrillin family protein	0.000190808	0.000140963	0.000249124	8.30438e-05	7.95402e-05	0.000148645	0.000237735	0.000124865	0.000158765
Bra002973	Translation protein SH3-like family protein	0.000546344	0.00079283	0.000582303	0.000396301	0.000379581	0.000486422	0.000270123	0.000510754	0.000454594
Bra024633	Putative thiol-disulphide oxidoreductase DCC	2.60164e-06	4.80503e-05	2.42626e-06	3.7743e-05	3.61506e-05	6.08027e-05	3.60165e-05	4.25628e-05	4.32947e-05
Bra011819	3-deoxy-D-arabino-heptulosonate 7-phosphate synthase 1	0.000209889	0.000276892	8.38887e-05	0.000217496	0.000208319	0.000373737	0.000124528	9.81081e-05	9.97951e-05
Bra027168	GDSL-like Lipase/Acylhydrolase superfamily protein	0.000131625	0.000121551	0.000122752	9.54769e-05	0.000121932	0.0001709	0.000151849	0.000179449	0.000219042
Bra027257	Legume lectin family protein	5.62746e-06	5.19675e-06	0.000104962	0.000489838	0.000234586	4.38396e-06	0.000779052	0.000414293	0.000749187
Bra031181	fructose-bisphosphate aldolase 1	0.0017085	0.0014343	0.00162954	0.00121112	0.00156469	0.00136122	0.00107509	0.00139755	0.00126004
Bra019143	RNA binding Plectin/S10 domain-containing protein	0.00085811	0.000475459	0.000400132	0.00105816	0.00119237	0.000802193	0.000950357	0.00063174	0.000999605
Bra012100	succinate dehydrogenase 1-1	0.000174235	0.000275827	0.000232128	0.000306934	0.000311277	0.000252078	0.000292893	0.000325769	0.00028995
Bra022486	plastid transcriptionally active 4	0.000764642	0.000529588	0.000579391	0.00038132	0.000597653	0.00055845	9.92392e-05	3.90923e-06	0.000318116
Bra011405	glycine decarboxylase P-protein 1	0.00107013	0.00124901	0.00103958	0.00142311	0.00119785	0.00172523	0.00120369	0.00125226	0.00121196
Bra031117	NAD(P)-binding Rossmann-fold superfamily protein	0.000346864	3.55906e-06	3.59424e-06	0.000251604	0.000160659	0.000240193	0.000426835	0.000252208	0.000320682
Bra011223	serine carboxypeptidase-like 29	3.22906e-06	2.98192e-06	9.03417e-05	4.68452e-05	0.000112172	0.000100622	0.000178809	5.28274e-05	8.06038e-05
Bra031705	acetyl Co-enzyme a carboxylase biotin carboxylase subunit	0.000493413	0.000416027	0.000380126	1.55612e-06	1.49046e-06	0.000601645	0.000386082	0.000456257	0.000374852
Bra014635	beta-1,3-glucanase 2	4.48896e-06	4.14538e-06	8.37271e-05	9.76845e-05	0.000842068	6.99407e-05	6.2144e-05	3.67196e-06	3.73511e-06
Bra012005	NAD(P)-linked oxidoreductase superfamily protein	0.000284614	0.000337924	0.000341265	0.000265436	0.000254237	0.000221723	0.00022515	0.000299332	0.00030448
Bra023426	phospholipid:diacylglycerol acyltransferase	0.000104066	2.40252e-06	2.42626e-06	5.66145e-05	0.000108452	0.000101338	5.40247e-05	0.000127688	0.000108237
Bra002326	chaperonin 20	0.00161531	5.73721e-06	5.79391e-06	0.00121676	0.000733785	0.00116158	0.00107509	0.00147378	0.00124065
Bra016926	autoinhibited Ca(2+)-ATPase, isoform 4	0.000165552	0.000180678	0.000210535	0.000163754	0.000125476	0.000140695	0.000145846	0.000184666	0.000175318
Bra034675	plasma membrane intrinsic protein 3	0.0014371	0.00183754	0.00206189	0.00140327	0.000921647	0.00172238	0.00118604	0.00108512	0.00114977
Bra034580	Pyridoxal phosphate (PLP)-dependent transferases superfamily protein	0.000225992	0.0003415	0.000249077	0.000387465	0.00034257	0.000320099	0.000312857	0.000184861	0.00018804
Bra010731	PLC-like phosphodiesterases superfamily protein	4.88421e-06	9.02077e-05	9.10993e-05	0.000106286	3.39338e-06	3.80495e-06	0.000270463	0.000159811	0.000325119
Bra011057	Photosystem I reaction centre subunit IV / PsaE protein	0.00195505	0.00200602	0.00232972	0.00165449	0.00143376	0.00135382	0.00135326	0.00177692	0.00225935
Bra029168	low psii accumulation2	0.000351001	0.00040517	0.00049101	0.000254605	0.000304829	0.00020508	6.07396e-06	0.000143559	0.000146028
Bra025895	Ribosomal protein L6 family protein	0.000796502	0.0011646	0.000680909	0.000770344	0.000645612	0.000775625	0.0011486	0.0010859	0.000938885
Bra002385	DNAJ homologue 3	0.000147221	0.000135953	0.000171621	0.000160184	0.00025571	0.000286724	0.000178333	0.000210746	0.000244995
Bra020549	glucoside glucohydrolase 2	0.00118563	0.00114963	0.000773996	0.00129003	0.000658989	0.000692733	0.00143619	0.00121231	0.00202238
Bra029193	Clp ATPase	1.64706e-06	1.521e-06	7.68016e-05	8.36309e-05	8.01025e-05	1.28311e-06	0.00030782	0.000309878	0.000191865
Bra002522	actin depolymerizing factor 3	0.00100566	0.000515936	0.000625243	0.000972628	7.76327e-06	8.70485e-06	0.000618757	0.000731223	0.000743797
Bra039113	carbonic anhydrase 1	0.00748688	0.00687091	0.00719902	0.0068812	0.00765705	0.00659327	0.00650205	0.00669485	0.00584265
Bra027372	Tetratricopeptide repeat (TPR)-like superfamily protein	0.000151284	0.000186273	9.4057e-05	3.65788e-06	3.50355e-06	0.00015714	6.98111e-05	0.00012375	0.000167837
Bra015023	dehydratase family	0.000406724	0.000328645	0.000260774	0.000368782	0.000335561	0.000356457	0.000316721	0.000207938	0.000232665
Bra011168	villin 4	3.21569e-05	1.48478e-06	2.99892e-05	1.16628e-06	3.35123e-05	1.25256e-06	6.67758e-05	7.8913e-05	8.027e-05
Bra022459	cell elongation protein / DWARF1 / DIMINUTO (DIM)	0.000415288	0.000485771	0.000361474	0.000180742	0.000153882	0.000323523	0.000153311	0.000317059	0.000345547
Bra015790	chloroplastic drought-induced stress protein of 32 kD	0.000253787	0.000328108	0.000331351	0.000294543	0.000282116	0.000276792	0.000175668	8.30392e-05	4.22336e-06
Bra023518	casein lytic proteinase B3	0.0002258	0.000178729	0.000105289	0.00014039	0.000179289	0.000175905	0.000189788	0.000369408	0.00032208
Bra001738	presequence protease 1	0.00044831	0.000427352	0.000404603	0.000377641	0.000462182	0.000383046	0.000270274	0.000414036	0.000300826
Bra037278	homoserine kinase	0.000125933	0.00015506	0.000156592	3.04494e-06	2.91647e-06	0.00016351	8.71696e-05	0.000137351	6.98566e-05
Bra023084	methionine adenosyltransferase 3	0.000716852	0.000698762	0.000482826	2.88879e-06	2.76691e-06	0.000930749	0.000551329	0.0004235	0.000662742
Bra012667	Ribosomal protein L23/L15e family protein	0.000532953	0.000773398	0.000639035	0.000441815	0.000370278	0.000830375	0.000895909	0.000934191	0.000823555
Bra023446	phosphate transporter 3;1	0.000208761	0.000578347	0.000467251	0.000635999	0.000783214	0.000813155	0.00092481	0.000512298	0.000729551
Bra002101	Co-chaperone GrpE family protein	0.000243445	0.000314737	0.000181627	0.000247222	0.000338274	0.000379302	0.000202211	0.000238965	0.00016205
Bra001154	Ribosomal L22e protein family	0.00212936	0.00173504	0.00105132	0.000999428	0.00121833	0.000878207	0.00130051	0.00174181	0.00187599
Bra022597	Class II aaRS and biotin synthetases superfamily protein	5.73129e-05	7.93894e-05	5.34494e-05	6.23595e-05	0.000219005	0.000111621	3.96713e-05	4.68819e-05	7.15321e-05
Bra013224	rotamase FKBP 1	0.000438287	0.00027826	0.000178825	0.0001987	0.000209348	0.000170719	0.000303377	0.000358518	0.000319098
Bra004675	Mitochondrial import inner membrane translocase subunit Tim17/Tim22/Tim23 family protein	0.000291221	8.96439e-06	9.05299e-06	0.000422485	0.000472104	0.00045374	6.71932e-06	7.94062e-06	0.000242315
Bra010315	Pyridoxal-5'-phosphate-dependent enzyme family protein	2.95844e-06	2.732e-06	2.75901e-06	0.000214596	2.05542e-06	2.30471e-06	4.09559e-05	7.26e-05	7.38484e-05
Bra035909	heat shock cognate protein 70-1	0.00287827	0.00270812	0.00207649	0.00277718	0.00292412	0.00302494	0.00298845	0.0032651	0.00309531
Bra034813	Dihydroneopterin aldolase	0.000207091	0.00019124	0.00019313	0.000375543	0.000215819	0.00016133	0.000286691	8.47e-06	8.61565e-06
Bra039731	acylaminoacyl-peptidase-related	0.000141935	9.36228e-05	9.45482e-05	0.000132371	0.000169049	0.000110572	0.000168422	0.000149275	0.000151842
Bra010384	Tetratricopeptide repeat (TPR)-like superfamily protein	0.000141198	0.000203736	5.76099e-05	3.84078e-05	4.29185e-05	8.93731e-05	1.83254e-05	7.21875e-05	3.67144e-05
Bra035365	P-loop containing nucleoside triphosphate hydrolases superfamily protein	9.34524e-05	5.17798e-05	8.71527e-05	1.35575e-06	2.5971e-05	4.36814e-05	1.29373e-06	3.05776e-05	1.55517e-06
Bra038265	RAB GTPase homolog 8A	0.000660927	0.000343317	0.000500804	0.000299635	0.000344392	0.000386162	0.000514671	0.000439269	0.000618677
Bra034674	catalase 2	0.00095287	0.00111459	0.00109599	0.00133629	0.00121371	0.00111347	0.00112126	0.00116917	0.00110999
Bra010774	photosystem I subunit K	1.19475e-05	0.000441324	1.11421e-05	0.000173327	8.30073e-06	9.30749e-06	0.000413497	0.000390923	0.000497057
Bra010123	1-deoxy-D-xylulose 5-phosphate reductoisomerase	0.000258325	0.000208734	0.000120456	0.000163958	0.000134606	0.000150932	6.70535e-05	2.64137e-06	8.06038e-05
Bra026314	Rhodanese/Cell cycle control phosphatase superfamily protein	0.000343624	0.000317323	0.000256368	0.000348955	0.000525223	0.000267693	0.000570845	0.000393518	0.000514651
Bra003644	glutathione S-transferase TAU 19	0.000283686	0.00019648	0.000198422	0.000154333	0.000344916	0.00016575	0.000294546	0.00046411	0.000354068
Bra023851	20S proteasome alpha subunit C1	0.000497017	0.00028686	0.000405574	0.000450651	0.000604293	0.000435591	0.000559047	0.00066066	0.000516939
Bra039557	UDP-glucosyl transferase 71B5	9.68719e-05	5.96383e-05	0.000120456	0.000140536	0.000157041	0.000100622	8.94047e-05	7.92412e-05	8.06038e-05
Bra002368	calmodulin 5	0.000625441	0.000673833	0.00058328	7.56126e-06	0.000796647	8.12063e-06	0.000432923	0.000255805	0.000520408
Bra011709	geranylgeranyl pyrophosphate synthase 1	0.000213936	0.00015805	0.000239418	0.000124146	2.97271e-06	9.99979e-05	2.96168e-06	3.5e-06	7.12037e-05
Bra003147	diaminopimelate epimerase family protein	0.000339493	0.00027432	0.000118728	0.000184693	0.000235868	0.000264475	8.81222e-05	0.000138852	0.00014124
Bra040490	ATP synthase subunit 1	0.00141198	0.00173855	0.0013168	0.000569004	0.00130799	0.00134442	0.00152033	0.001925	0.0019581
Bra016262	alpha-amylase-like 3	0.000173346	0.00014407	0.000129328	6.28698e-05	8.43043e-05	0.000175554	1.19988e-06	5.67187e-05	4.32705e-05
Bra035525	glucose-6-phosphate dehydrogenase 1	2.72488e-06	2.51632e-06	0.000101648	5.92962e-05	7.5726e-05	0.000127366	7.5445e-05	4.45789e-05	6.80183e-05
Bra005236	methionine adenosyltransferase 3	0.000832804	0.000653703	0.000543665	0.00060409	0.00101256	0.00103805	0.000461165	0.000442802	0.000692947
Bra000692	S18 ribosomal protein	0.00163493	0.00113234	0.00142942	0.00118592	0.00134887	0.00111445	0.00106095	0.000919441	0.00119032
Bra037502	Aldolase-type TIM barrel family protein	0.000162637	0.000187736	0.000189591	2.94929e-06	2.82486e-06	9.50242e-05	8.44312e-05	6.65183e-05	3.38311e-06
Bra020809	NAD(P)-binding Rossmann-fold superfamily protein	0.000511173	0.000363114	0.000403374	0.000285222	0.000382464	0.000306323	0.000353827	0.000482468	0.0005562
Bra040987	Vesicle transport v-SNARE family protein	7.02796e-06	0.000129801	0.000131084	0.000305872	0.000292967	0.00027375	0.000194587	0.000172466	0.000350863
Bra009841	Protein of unknown function, DUF642	0.000719456	0.000898881	0.000868298	0.000706061	0.000617466	0.00049454	0.00105459	0.000623133	0.000985987
Bra004455	thioredoxin family protein	8.60487e-05	0.000158925	4.01241e-06	0.000156043	0.000298918	0.000234621	0.000387152	0.000246357	0.000286393
Bra007220	eukaryotic translation initiation factor 3C	1.7354e-06	0.00011218	1.61841e-06	3.77641e-05	6.02846e-05	0.000148712	9.60975e-05	8.51732e-05	7.21982e-05
Bra028025	one-helix protein 2	0.000451505	0.000416948	0.000252642	0.000327508	0.000376428	0.000281389	0.000187516	7.38663e-06	0.000150273
Bra012292	proteasome beta subunit C1	0.000152272	0.000210927	7.10038e-06	0.000441815	0.000581865	0.000415187	0.000368904	0.000186838	0.000253401
Bra018677	ascorbate peroxidase 1	0.00101848	0.000611342	0.000712366	0.0011451	0.00113217	0.00103145	0.00105747	0.000791459	0.00122879
Bra037609	ribosomal protein L9	0.00103017	0.000804965	0.00073902	0.000804734	0.000991006	0.000802534	0.000603367	0.000777857	0.000659361
Bra022204	lipoamide dehydrogenase 2	0.000154085	2.84584e-06	2.87397e-06	2.23537e-06	2.14106e-06	0.000168052	0.000298636	0.000201667	0.00028206
Bra036580	P-loop containing nucleoside triphosphate hydrolases superfamily protein	0.000222944	6.86269e-06	0.000277221	0.000269528	0.000413051	0.000289468	5.14398e-06	0.000121579	6.18348e-06
Bra038389	RNA-binding (RRM/RBD/RNP motifs) family protein	0.000272488	0.000352285	0.000203295	0.000237185	0.000151452	0.000339642	0.00015089	8.91579e-05	4.53455e-06
Bra009263	glutamate dehydrogenase 2	0.000113371	3.48979e-06	3.52428e-06	2.74119e-06	0.000131277	2.94398e-06	0.000261579	0.000185474	0.000125776
Bra011645	GTP-binding 2	7.36104e-06	0.000203929	6.86483e-06	0.000587341	5.11419e-06	5.73448e-06	0.000509522	0.000662346	0.000489989
Bra037156	dolichyl-diphosphooligosaccharide-protein glycosyltransferase 48kDa subunit family protein	0.000107116	3.29725e-06	9.98951e-05	0.000155397	0.000223261	0.000194709	0.000222433	0.000262862	0.000237673
Bra040120	Ribose 5-phosphate isomerase, type A protein	0.00158142	0.0011996	0.00121145	0.00122905	0.00133415	0.00131997	0.0013292	0.0008316	0.000610928
Bra035067	Curculin-like (mannose-binding) lectin family protein	0.000102633	0.00012637	9.57144e-05	0.000248156	0.000142612	0.000159909	0.000189443	0.000111938	0.000256192
Bra018543	glutathione S-transferase F3	0.000145838	0.000134676	0.000612033	0.00031736	0.00182382	0.000511257	0.000908528	0.000775422	0.000728083
Bra028445	thioredoxin 2	0.000350341	0.000323527	0.000326724	0.000169418	0.000243405	9.09755e-06	0.00040417	0.000382105	0.000583014
Bra039444	Metallopeptidase M24 family protein	4.46316e-05	2.06078e-06	6.24344e-05	0.00011331	0.000170547	8.69234e-05	7.72336e-05	0.00012778	9.2841e-05
Bra032659	SEC7-like guanine nucleotide exchange family protein	3.54607e-05	3.27466e-05	2.48027e-05	6.43052e-07	1.23184e-05	1.38125e-05	1.22727e-05	2.90068e-05	2.21292e-05
Bra015315	NAD(P)-linked oxidoreductase superfamily protein	7.39609e-05	0.0001366	0.000103463	0.00024142	0.000231235	0.000144045	0.000230377	9.075e-05	0.000123081
Bra033713	HAD superfamily, subfamily IIIB acid phosphatase	0.000460201	0.000212489	0.000429179	8.34539e-05	3.99665e-06	4.48139e-06	0.000557455	0.000470555	4.78647e-06
Bra026087	NDH-dependent cyclic electron flow 1	0.000101515	6.24968e-05	6.31145e-05	2.45453e-06	2.35097e-06	5.27222e-05	2.34225e-06	2.76797e-06	5.63114e-05
Bra001249	auxin-responsive family protein	6.0909e-06	0.000168741	5.68031e-06	0.000132544	0.000211587	0.0001898	4.21604e-06	4.98235e-06	0.000101361
Bra038615	MA3 domain-containing protein	0.000125933	0.000116295	0.000156592	0.000152247	8.74942e-05	9.8106e-05	0.000101698	8.58446e-05	8.73207e-05
Bra026399	small ubiquitin-like modifier 1	0.000465954	0.00028686	0.000434544	1.12663e-05	0.000323728	1.20997e-05	1.07509e-05	0.0002541	1.29235e-05
Bra005099	lipid transfer protein 2	0.00144788	0.00230947	0.000982019	0.00114572	0.000274346	0.00112794	0.00127553	0.00226106	0.00295707
Bra018941	myrosinase-binding protein 2	0.000322832	0.000331247	0.000267617	0.00104076	0.000573191	0.000586824	0.000620722	0.000234734	0.000925237
Bra020098	Ribosomal protein S8e family protein	0.00233664	0.00234819	0.0016023	0.00179463	0.0020054	0.00176678	0.00233095	0.00224867	0.00263044
Bra035529	glutamine synthetase 2	0.00250396	0.00261391	0.00260591	0.00265863	0.00292465	0.00310975	0.00223559	0.00282003	0.00250619
Bra006182	cyclophilin 20-2	0.00024174	0.000390666	0.000394527	0.000657565	0.000755786	0.000470807	0.000627485	0.000247179	0.000402287
Bra038418	photosystem I subunit F	0.00415639	0.00404029	0.00530429	0.00391411	0.00390095	0.0035788	0.00373506	0.0041157	0.00382243
Bra021826	gamma subunit of Mt ATP synthase	0.000387085	0.00058087	0.000315868	0.000807241	0.000672333	0.000527715	0.000937774	0.000474953	0.000644161
Bra037112	Subtilase family protein	8.19619e-05	3.78444e-05	5.73276e-05	0.000118905	0.000498263	9.57763e-05	5.6733e-05	0.000150851	0.000102297
Bra014755	PsbP-like protein 1	0.000881717	0.000814232	0.00101204	0.000934757	0.000753953	0.000845397	0.00103284	0.000943166	0.00101582
Bra018619	ALBINA 1	0.000102723	0.000113833	9.57988e-05	1.49025e-06	2.85475e-05	4.80149e-05	1.42208e-06	6.72222e-05	1.70945e-06
Bra029025	flavodoxin-like quinone reductase 1	0.000227294	0.000139932	7.06575e-06	0.000274787	0.00042111	0.000354139	0.000262217	0.000371854	0.000441289
Bra008747	peptide deformylase 1B	0.000112143	0.00010356	0.000104583	4.06725e-06	7.7913e-05	4.36814e-06	3.8812e-06	9.17328e-05	4.66551e-06
Bra000996	unknown protein;	0.00018668	5.17176e-05	0.000139277	8.12472e-05	2.59398e-05	0.000159973	0.000245514	0.000198516	0.000248528
Bra001122	pathogenesis-related 4	1.10941e-05	1.0245e-05	0.000206926	0.000321894	0.000385391	8.64267e-06	0.00069113	0.000363	0.000553863
Bra024616	Oxidoreductase, zinc-binding dehydrogenase family protein	0.00193643	0.00167646	0.00146729	0.00187284	0.00184988	0.0019171	0.00117283	0.001551	0.00171194
Bra010011	GDP-D-mannose 3',5'-epimerase	0.000655696	0.0010218	0.0010319	0.000624253	0.000797221	0.000766211	0.000595697	0.000536359	0.000750175
Bra018654	lactoylglutathione lyase family protein / glyoxalase I family protein	0.000196605	0.000121038	0.000183352	0.000285222	0.000227657	0.000204215	0.00018145	0.00021443	0.000272647
Bra031210	cold, circadian rhythm, and rna binding 2	0.00110941	0.0010245	0.000517314	0.000871795	0.000770782	0.000864267	0.000447955	0.000605	0.000615403
Bra028992	Dihydrolipoamide succinyltransferase	9.43226e-05	8.71033e-05	2.93214e-06	2.28062e-06	2.1844e-06	9.79736e-05	0.000174104	0.00018003	0.000156965
Bra029436	Double Clp-N motif protein	6.36549e-06	0.000176349	0.000237455	0.000184693	0.000309576	0.000198356	4.40611e-06	5.20697e-06	0.00010593
Bra014309	myrosinase-binding protein 2	9.09355e-05	5.03853e-05	3.39222e-05	6.59618e-05	6.31789e-05	1.41683e-06	0.000188833	0.000223156	0.000166462
Bra033655	regulatory particle triple-A ATPase 4A	0.000155707	0.000107842	3.63027e-06	0.000254127	0.000243405	0.000303252	0.000458059	0.000222895	0.000194338
Bra002139	glutamate dehydrogenase 1	3.77902e-06	0.000104694	0.000140971	0.000219295	0.000157532	0.000294398	0.000313895	0.000185474	0.000345884
Bra000724	Tetratricopeptide repeat (TPR)-like superfamily protein	0.00017882	0.000141543	7.1471e-05	1.85301e-06	0.000124238	9.95045e-05	1.76824e-06	4.17928e-05	2.12557e-06
Bra017624	S-adenosyl-L-methionine-dependent methyltransferases superfamily protein	0.000301004	5.55931e-06	0.000168428	0.000436677	0.000501905	0.000515881	0.000458372	0.000344709	0.000551001
Bra005522	peroxisomal 3-ketoacyl-CoA thiolase 3	0.000134474	6.2091e-05	0.000438933	0.000438946	0.000210213	0.00015714	0.000861004	0.0003025	0.000643376
Bra021815	beta glucosidase 33	5.19458e-05	2.3985e-06	2.4222e-06	1.88399e-06	5.41352e-05	4.04674e-05	0.000107869	8.49833e-05	8.64446e-05
Bra016503	dehydroascorbate reductase	7.39609e-06	0.0002049	6.89752e-06	5.36489e-06	0.000513855	5.76178e-06	0.000665533	0.0004235	0.000307702
Bra007142	Chalcone-flavanone isomerase family protein	0.000123759	5.71435e-06	5.77083e-06	0.000134657	4.29918e-06	0.000144618	0.000299826	0.000253088	0.000205952
Bra015299	cytosolic ribosomal protein S15	0.000306548	0.000566172	9.52946e-06	0.000963563	0.000780924	0.000955243	0.000495108	8.35855e-06	8.50228e-06
Bra027728	general control non-repressible 3	4.07658e-05	1.88229e-06	1.90089e-06	1.47851e-06	2.83227e-05	1.58789e-06	2.82176e-05	5.00197e-05	5.08798e-05
Bra010665	Lipase/lipooxygenase, PLAT/LH2 family protein	0.000610801	0.000161157	0.00016275	0.000316468	0.000242493	0.000271904	0.000422789	0.000642388	0.00058083
Bra002177	NAD(P)-binding Rossmann-fold superfamily protein	0.00015153	0.000244881	0.000353287	8.24362e-05	0.000184236	0.000206581	5.24435e-05	0.000154939	3.15207e-06
Bra038678	Dihydroneopterin aldolase	1.01515e-05	0.00018749	9.46718e-06	0.000147272	0.000211587	0.00023725	0.000140535	8.30392e-06	8.44671e-06
Bra007315	beta-1,3-glucanase 2	4.72091e-06	4.35958e-06	4.40267e-06	3.4244e-06	0.000491989	3.67773e-06	9.80326e-05	7.7234e-05	7.85621e-05
Bra035124	phosphoglycerate kinase	0.00240142	0.00211032	0.002673	0.00264097	0.00282556	0.00286652	0.00268103	0.0028515	0.00241711
Bra022819	Heat shock protein 70 (Hsp 70) family protein	0.0014162	0.00141501	0.000974313	0.00146512	0.00169365	0.00146499	0.00151059	0.0016902	0.00148745
Bra038815	SECY homolog 1	5.63767e-05	2.60309e-06	5.25764e-05	8.17879e-05	3.91686e-05	0.000131758	3.90233e-05	2.30581e-06	2.34546e-06
Bra013352	NAD(P)-binding Rossmann-fold superfamily protein	0.000103545	2.3905e-06	2.41413e-06	5.63314e-05	8.99246e-05	8.0665e-05	3.58364e-05	2.1175e-06	2.15391e-06
Bra013013	calcium sensing receptor	0.00228763	0.00233491	0.0025077	0.00200872	0.00184032	0.00234491	0.00191683	0.00206826	0.00227079
Bra032268	chorismate synthase, putative / 5-enolpyruvylshikimate-3-phosphate phospholyase, putative	0.000141843	3.27466e-06	3.30703e-06	0.000102888	0.000197095	0.000248625	4.90909e-05	5.80137e-05	2.95056e-06
Bra014229	CLP protease proteolytic subunit 1	0.000360273	0.000147866	0.00018666	8.71104e-05	0.000111247	0.000187109	0.000138543	0.000130979	6.66158e-05
Bra015380	ethylene-forming enzyme	9.67713e-05	0.000134047	0.000135372	3.50974e-06	3.36167e-06	7.53878e-05	0.000133968	3.95794e-06	4.026e-06
Bra018845	Prolyl oligopeptidase family protein	2.18758e-06	2.02014e-06	4.08022e-05	1.5868e-06	0.000136787	1.70419e-06	7.57106e-05	0.000178944	7.28083e-05
Bra021465	6-phosphogluconate dehydrogenase family protein	0.00019175	2.95124e-06	0.000178825	0.000347725	0.00031085	0.000323656	0.000420303	0.00039213	0.00053183
Bra000454	thioredoxin family protein	0.000128716	3.96216e-06	0.000160053	0.000217856	0.000327902	0.000300822	0.000267288	0.000280773	0.000249901
Bra000953	Ribosomal L5P family protein	0.000647158	0.000760615	0.000603533	0.000426753	0.000613122	0.000504156	0.000610847	0.000336875	0.000489525
Bra002290	Ribosomal protein S8e family protein	0.00212108	0.00284333	0.00172286	0.00178672	0.00185395	0.00170569	0.00208388	0.0023507	0.00256192
Bra026409	PLC-like phosphodiesterase family protein	8.20702e-05	0.000151577	0.000114807	0.000193476	0.000128294	0.000159838	0.000113616	0.000117483	0.000119504
Bra016127	Peroxidase superfamily protein	0.000171622	0.00023773	4.00132e-06	0.000529079	0.000268283	0.000334247	0.000475178	0.000386063	0.000499803
Bra000483	Histone superfamily protein	0.00120246	0.00212832	0.00102795	0.00174446	0.00194933	0.00202963	0.00145658	0.000983613	0.00133404
Bra030303	fructose-bisphosphate aldolase 1	0.00274793	0.00213306	0.00263697	0.0019066	0.00249022	0.00232687	0.00168155	0.00218265	0.0020545
Bra001415	Thioredoxin superfamily protein	0.00187191	0.00196224	0.00268936	0.00289914	0.00281197	0.00240418	0.00269648	0.00273137	0.00231528
Bra013582	SKU5 similar 4	0.000229675	0.00026512	0.000214193	0.000291549	0.000259302	0.000290752	0.000298084	0.000234843	0.000310546
Bra018876	Ankyrin repeat family protein	0.000352995	0.000244483	0.0002469	0.000192039	6.13122e-06	0.000206246	6.10847e-06	0.000144375	7.34288e-06
Bra028774	clathrin adaptor complexes medium subunit family protein	0.000148204	2.73722e-06	2.76427e-06	0.000150504	0.000144154	0.000184729	2.0517e-06	0.000121231	2.46631e-06
Bra028863	Glutathione S-transferase family protein	3.36915e-06	6.22257e-05	9.42611e-05	0.000122194	0.000234077	0.000104987	0.000209888	0.000165358	8.41007e-05
Bra039925	Protein of unknown function (DUF1012)	3.83975e-05	1.77293e-06	1.79046e-06	5.57047e-05	2.66773e-05	4.48693e-05	1.32891e-06	1.57046e-06	3.19492e-05
Bra034523	Copper amine oxidase family protein	2.18143e-06	6.04341e-05	2.03438e-06	3.16468e-05	7.57791e-05	6.79761e-05	1.50996e-06	1.78441e-06	3.63019e-05
Bra028781	ACT domain-containing protein	4.42501e-06	0.00012259	0.000123802	3.20977e-06	3.07434e-06	6.89444e-05	9.18881e-05	0.000180983	0.000110457
Bra021214	Adenine nucleotide alpha hydrolases-like superfamily protein	0.000667009	0.00043997	0.000622046	0.000760301	0.000860628	0.000371158	0.000791478	0.000935337	0.00110999
Bra033753	RAB GTPase homolog E1B	0.00304738	0.00344959	0.00284195	0.00268584	0.00261806	0.00301217	0.00324342	0.00321646	0.00291732
Bra035244	PLC-like phosphodiesterase family protein	0.000143433	0.000227066	0.000229311	0.00032699	0.00032743	0.000239441	0.000212749	0.000184373	0.00030689
Bra011796	serine transhydroxymethyltransferase 1	0.0013519	0.00147037	0.00176507	0.00167796	0.00175327	0.00236378	0.00174676	0.00186766	0.0017248
Bra035392	glutamine synthetase 2	0.00290314	0.00288201	0.00301202	0.00286922	0.00320199	0.00327937	0.00241142	0.00296846	0.00283833
Bra010712	vacuolar proton ATPase A3	0.000208608	0.000140103	0.000106116	0.000220098	0.000131758	0.000192059	0.000183776	0.000279231	0.000252473
Bra025534	ribosomal protein large subunit 27	0.00047066	0.000434637	0.000438933	0.000227602	0.000217999	0.000305549	0.00021719	0.0001925	6.52701e-06
Bra004460	Prolyl oligopeptidase family protein	0.000131347	4.54853e-05	0.000137805	4.76375e-05	3.42208e-05	5.11617e-05	5.6823e-05	0.000188023	8.1967e-05
Bra005371	AICARFT/IMPCHase bienzyme family protein	6.16341e-05	3.79445e-05	5.74793e-05	2.9805e-05	7.13687e-05	0.000112035	2.84416e-05	1.68056e-06	3.41891e-05
Bra021912	NAD(P)-binding Rossmann-fold superfamily protein	0.000214973	0.000248149	0.000300722	7.79673e-05	3.73389e-06	0.000209338	0.000148802	0.000307734	0.000313025
Bra024339	ABC2 homolog 13	0.000123924	0.000114439	0.00011557	1.49818e-06	1.43497e-06	8.04504e-05	4.28893e-05	8.44747e-05	1.71855e-06
Bra012530	Glutathione S-transferase family protein	8.72572e-05	4.02894e-06	0.00016275	3.16468e-06	3.03117e-06	6.79761e-05	0.000150996	0.000107065	0.000108906
Bra026092	Ribosomal protein L7Ae/L30e/S12e/Gadd45 family protein	0.000906021	0.00119525	0.000603533	0.00103274	0.00161864	0.00131081	0.0009855	0.00105875	0.00096926
Bra028809	chloroplast signal recognition particle 54 kDa subunit	0.000137693	7.62926e-05	0.000128411	5.9927e-05	9.56644e-05	0.000150174	1.90619e-06	6.75798e-05	4.58279e-05
Bra000914	S-adenosylmethionine synthetase 2	0.00071138	0.000948902	0.000515997	2.86674e-06	0.00090611	3.07882e-06	2.7356e-06	0.000387939	3.28841e-06
Bra017210	PHE ammonia lyase 1	8.60487e-05	0.00013906	2.0062e-06	7.80213e-05	0.000134513	0.000117311	1.48905e-06	5.27908e-05	1.78995e-06
Bra020388	phototropin 2	0.000123408	6.51215e-05	4.93239e-05	1.27881e-06	1.22485e-06	8.24046e-05	4.88123e-05	1.44211e-06	1.46691e-06
Bra011902	Peptidase M20/M25/M40 family protein	7.19064e-05	3.32014e-06	6.70592e-05	0.000104317	7.49371e-05	0.000140043	0.000174205	8.82292e-05	0.000149577
Bra018715	Peptidase M1 family protein	0.000146526	0.000255588	9.10993e-05	0.000165333	0.000169669	0.000215614	0.000270463	0.000266352	0.000230292
Bra034728	short-chain dehydrogenase-reductase B	5.28292e-06	4.87858e-06	9.8536e-05	7.66413e-05	3.67039e-06	8.23112e-05	0.000182839	0.000129643	0.000131872
Bra017503	Chlorophyll A-B binding family protein	0.000178526	0.000329725	0.000166492	0.000129497	0.000165379	0.000185437	0.000123574	4.86782e-06	9.90304e-05
Bra007087	glutathione reductase	8.27626e-05	0.000101904	0.000180095	0.000140078	0.000153335	0.000171932	0.000229149	0.000157966	0.000160683
Bra004177	CLP protease proteolytic subunit 3	0.000248112	0.000229122	0.000138832	0.000179972	0.000206855	0.000231944	0.000103044	0.000162364	0.000165156
Bra002954	tryptophan synthase beta-subunit 1	3.34017e-06	0.000123381	3.11501e-06	0.000145371	0.000139238	0.000104084	2.31202e-06	2.73226e-06	0.00011117
Bra020806	BR-signaling kinase 1	3.06347e-06	2.829e-06	0.000142848	2.22215e-06	2.12839e-06	7.15961e-05	8.48198e-05	0.000150355	0.00010196
Bra001028	Ribosomal protein S19e family protein	0.000868911	1.00301e-05	1.01292e-05	0.000866637	0.000980995	0.000930749	7.51812e-06	0.000799615	9.03739e-06
Bra011946	beta-galactosidase 8	3.67616e-05	1.6974e-06	5.14253e-05	9.33301e-05	8.93925e-05	5.72769e-05	0.000101784	4.51065e-05	9.17643e-05
Bra027005	nucleotide-rhamnose synthase/epimerase-reductase	0.000366069	0.000338051	0.000292622	0.000379336	0.000254332	0.000285179	0.000289587	0.000171111	0.00026108
Bra020139	Glycosyl hydrolase family protein	0.000584268	0.000764361	0.000590289	0.000882937	0.000997909	0.000644814	0.000690889	0.000696983	0.000668455
Bra000112	Acyl-CoA N-acyltransferases (NAT) superfamily protein	6.63752e-06	0.00012259	0.000123802	9.6293e-05	0.000184461	0.000155125	9.18881e-05	5.42949e-06	5.52285e-06
Bra013839	arginosuccinate synthase family	0.000155629	2.87435e-06	2.90276e-06	0.000361243	0.000302752	0.000266728	0.000280084	2.54609e-06	0.000155392
Bra038368	NAD(P)-binding Rossmann-fold superfamily protein	9.64707e-05	8.90871e-05	8.99676e-05	3.49884e-06	3.35123e-06	7.51537e-05	0.000100164	3.94565e-06	4.0135e-06
Bra003758	ornithine carbamoyltransferase	0.000164794	0.000114135	0.000153685	5.9768e-05	5.72464e-05	9.62844e-05	2.8517e-06	6.74005e-05	6.85595e-05
Bra039224	Uncharacterised BCR, YbaB family COG0718	0.000678985	0.000862149	0.000712366	0.000554079	0.000589669	0.000462832	0.000469985	0.000833115	0.00049434
Bra035826	translocase of the outer mitochondrial membrane 40	0.000100529	4.64175e-06	4.68763e-06	0.000109381	3.49222e-06	3.91577e-06	0.00013917	8.2233e-05	0.000125471
Bra019572	FASCICLIN-like arabinogalactan 2	3.89268e-06	0.000215684	0.000145211	0.000310599	0.000243405	0.000303252	2.69446e-06	3.18421e-06	0.000194338
Bra015574	ribosomal protein L4	0.000933005	0.00050682	0.000818928	0.000636963	0.00068635	0.00081235	0.000569836	0.000538728	0.000502326
Bra015397	Ribosomal protein L6 family	0.00111439	0.000707503	0.00077945	0.000555736	0.000629069	0.000759625	0.000723155	0.000797623	0.000753386
Bra025940	basic transcription factor 3	9.3565e-06	0.000345615	0.000174515	0.000407215	0.00045504	0.00021867	6.47645e-06	7.65361e-06	0.000233557
Bra020115	germin 3	0.000146526	0.000135311	0.000136649	0.000212571	0.000203603	0.000228297	0.000101424	0.000179788	0.000243839
Bra027022	stress-inducible protein, putative	0.000273929	0.000227667	0.000153278	0.00013909	5.7095e-05	0.000192059	5.68831e-05	0.000179259	6.83782e-05
Bra033317	Flavin containing amine oxidoreductase family	0.000115909	0.000187316	0.000297262	0.00025223	0.000261721	0.000293464	0.000200577	0.00014222	0.000168777
Bra032829	adenine phosphoribosyl transferase 1	0.000335822	7.75298e-06	0.000313185	0.000608988	0.000874942	0.000457828	0.000871696	0.000412054	0.000488996
Bra034141	alpha-L-arabinofuranosidase 1	2.30442e-06	2.12804e-06	6.44723e-05	0.000100293	0.000112072	1.79521e-06	9.57054e-05	0.000150801	0.000153394
Bra021450	DEGP protease 2	0.000205379	0.000237075	0.000167593	0.000242085	0.000214035	0.000199996	0.000124391	2.1e-06	0.000106806
Bra020079	regulatory particle triple-A ATPase 6A	0.00043084	0.000417758	0.000341528	0.00060941	0.000463966	0.000436329	0.000477156	0.000370048	0.000412261
Bra011514	1,2-alpha-L-fucosidases	1.95123e-06	3.60377e-05	1.8197e-06	2.83072e-05	4.06694e-05	1.52007e-06	8.1037e-05	3.19221e-05	6.49421e-05
Bra007337	N-acetyl-l-glutamate kinase	9.05644e-05	0.000292715	0.000168919	0.00026277	0.000346065	0.000211657	0.000188063	7.40816e-05	3.76778e-06
Bra019192	magnesium-protoporphyrin IX methyltransferase	0.000805352	0.000637467	0.000643768	0.000417269	0.000159866	0.000627394	0.000557455	0.000470555	0.000478647
Bra034864	Clathrin, heavy chain	0.000344455	0.000433761	0.00024336	0.000355857	0.000442371	0.00042284	0.000404604	0.000495222	0.000460312
Bra009317	unknown protein;	0.000238951	0.000330993	0.000334264	8.66637e-06	8.30073e-06	0.000279225	8.26993e-06	0.000293192	9.94113e-06
Bra017686	ascorbate peroxidase 3	0.000162353	0.000149927	0.000151409	0.000117766	3.75991e-06	4.21594e-06	3.74596e-06	8.85366e-05	9.0059e-05
Bra024367	Ribosomal L29 family protein	0.000643328	0.00110331	0.000771379	0.000599979	0.000383111	7.15961e-06	0.000508919	7.51775e-06	7.64702e-06
Bra036910	O-acetylserine (thiol) lyase (OAS-TL) isoform A1	0.000730335	0.000899249	0.000817323	0.00084762	0.000879513	0.000758605	0.00111216	0.000796552	0.00109384
Bra010622	serine transhydroxymethyltransferase 1	0.000901264	0.00127617	0.00137283	0.00132929	0.00146106	0.00182549	0.00145564	0.00142532	0.00127485
Bra006200	delta subunit of Mt ATP synthase	0.000445584	0.000293914	0.000415547	0.000507906	0.000398027	0.00054548	0.000440611	0.000312418	0.00031779
Bra006903	RNA-binding (RRM/RBD/RNP motifs) family protein	0.000495037	0.000457148	0.00034625	0.000224428	0.000386926	0.000289237	0.000214162	0.000354323	0.000360416
Bra040069	pantothenate kinase 2	5.18302e-05	4.78632e-05	4.83363e-05	2.5064e-05	3.60098e-05	5.38365e-05	7.17525e-05	5.65295e-05	4.31262e-05
Bra006590	molybdopterin biosynthesis CNX1 protein / molybdenum cofactor biosynthesis enzyme CNX1 (CNX1)	6.93383e-05	2.13438e-06	4.31095e-05	1.67653e-06	1.6058e-06	3.60111e-05	4.79951e-05	5.67187e-05	5.76941e-05
Bra019558	alpha/beta-Hydrolases superfamily protein	0.000192344	0.000266434	0.000224223	0.000174401	0.00023386	0.000299684	0.000299561	0.000275341	0.000320086
Bra004319	alpha-xylosidase 1	1.6773e-06	9.29353e-05	1.56423e-06	0.000133833	8.1573e-05	1.30667e-06	0.000174151	0.000150923	0.000167475
Bra002665	unknown protein;	0.000366316	0.000608902	0.000478271	0.000212571	0.000254504	0.000228297	0.000202847	0.000239717	6.09598e-06
Bra013209	Aldolase-type TIM barrel family protein	3.86363e-06	7.13583e-05	3.60318e-06	0.000168153	0.000107373	0.000120395	0.000106974	3.16045e-06	0.000128592
Bra008616	Alpha-1,4-glucan-protein synthase family protein	0.000178526	4.12156e-06	4.16229e-06	3.23744e-06	6.20169e-05	3.47694e-06	9.26803e-05	0.000109526	0.000111409
Bra000351	Citrate synthase family protein	0.000174908	3.23041e-06	3.26234e-06	0.000380617	0.000510383	0.00049053	2.42138e-06	0.000457838	0.000494818
Bra012616	Ribosomal protein L32e	0.00186849	0.00226469	0.0013069	0.00118592	0.00081135	0.00154658	0.00121251	0.00171947	0.00165187
Bra000791	tRNA synthetase class I (I, L, M and V) family protein	8.12332e-05	9.00189e-05	4.54543e-05	2.35696e-05	1.12876e-06	5.06265e-05	1.12457e-06	5.3159e-05	1.35183e-06
Bra003526	lipoxygenase 2	0.00171812	0.00231646	0.00203492	0.00229314	0.00243513	0.00231555	0.00218824	0.00193948	0.00220156
Bra029067	NADH-dependent glutamate synthase 1	7.76943e-05	7.17477e-05	3.95219e-05	2.04935e-05	3.43505e-05	4.95215e-05	3.4223e-05	6.35539e-05	5.87698e-05
Bra037091	GTP-binding protein-related	3.98251e-06	0.000110331	0.000111421	0.000173327	0.000221353	0.000217175	0.000192965	0.000228038	9.94113e-05
Bra014529	O-acetylserine (thiol) lyase isoform C	0.000184026	0.000271906	3.43241e-06	0.000560644	0.000460277	0.000401413	0.000356665	0.00027096	0.000398116
Bra025899	methylthioalkylmalate synthase-like 4	3.7426e-06	3.45615e-06	0.000209419	8.1443e-05	0.000182016	0.00014578	7.77174e-05	3.06145e-06	3.11409e-06
Bra008470	plastid transcriptionally active 17	0.000136543	0.000315231	0.000222843	0.000123805	0.000308313	0.000212743	0.000118142	0.000111692	0.000142016
Bra006572	chaperonin 20	0.00165754	0.00175744	0.0014313	0.00142498	0.000853039	0.0013391	0.00114733	0.00155674	0.00127702
Bra010843	Alba DNA/RNA-binding protein	0.000358426	0.000661985	1.11421e-05	0.000346655	0.000332029	0.000279225	0.000165399	9.77308e-06	9.94113e-06
Bra031534	photosystem II subunit P-1	0.00466544	0.00321763	0.005122	0.00381254	0.00332345	0.0034965	0.0027797	0.00396125	0.0028009
Bra032019	Zinc-binding dehydrogenase family protein	0.000231128	0.000298813	0.000431095	0.000368836	0.000417507	0.000216067	0.000383961	0.000567187	0.000500015
Bra000871	vacuolar ATPase subunit F family protein	0.00060671	0.000448219	0.000565812	0.00079216	0.00109596	0.000567175	0.00058794	0.00119109	0.000807717
Bra020605	cysteine synthase D2	0.000536813	0.000396581	0.000433876	0.000467265	0.000323231	0.000446073	0.000520205	0.000468387	0.000625329
Bra018062	Haloacid dehalogenase-like hydrolase (HAD) superfamily protein	0.000338699	4.46823e-06	0.000315868	0.000245682	0.000369783	0.000452327	0.000200952	3.95794e-06	4.026e-06
Bra010412	Ribosomal protein L14	0.00208636	0.00149852	0.00129714	0.000672614	0.00144953	0.000722373	0.00120346	0.00189627	0.000867994
Bra020586	MIRO-related GTP-ase 1	2.40803e-06	2.22372e-06	4.49141e-05	5.24013e-05	1.67302e-06	3.75186e-05	8.33404e-05	5.9093e-05	6.01092e-05
Bra029589	Mevalonate/galactokinase family protein	9.39423e-05	8.67521e-05	0.000146016	0.000136286	0.000174048	0.000146368	0.000216752	0.000204919	0.000104222
Bra035168	HOPW1-1-interacting 1	0.000172193	0.000222619	3.2117e-06	0.000224826	0.00021534	0.000160972	0.00011919	2.81707e-06	2.86551e-06
Bra030763	calreticulin 1b	0.000282396	0.000217318	2.19466e-06	0.000512103	0.000523198	0.000329993	0.000504967	0.00051975	0.000469944
Bra039115	cyclophilin 38	0.000399181	0.000469164	0.000507644	0.000447492	0.000252125	0.000339245	0.000427022	0.000356215	0.000392535
Bra018180	alpha-glucan phosphorylase 2	0.000295492	0.000306985	0.000241126	0.000281322	0.000410595	0.000633042	0.000319587	0.000362568	0.000353436
Bra029986	casein kinase II, alpha chain 2	9.44182e-05	0.000174383	8.80534e-05	3.4244e-06	3.27992e-06	7.35547e-05	3.26775e-06	0.000115851	7.85621e-05
Bra000339	Late embryogenesis abundant protein, group 2	0.000199894	1.84595e-06	1.86419e-06	1.44997e-06	0.000305535	1.55724e-06	0.000276729	0.000196216	0.000249488
Bra001453	basic chitinase	6.41809e-06	0.000237075	5.98545e-06	0.000651768	0.000713451	0.000149997	0.000399827	5.25e-06	0.000160208
Bra001036	Proteasome component (PCI) domain protein	7.4852e-05	0.000103684	3.49031e-06	0.000162886	0.000104009	0.000204092	0.000155435	9.18434e-05	0.000155704
Bra033452	tetratricopeptide repeat (TPR)-containing protein	1.12468e-06	4.15439e-05	1.04886e-06	1.63161e-05	7.81387e-07	8.76158e-07	1.55697e-05	6.4399e-05	1.87161e-05
Bra002370	Chaperone DnaJ-domain superfamily protein	0.0002863	0.000264387	0.000267001	0.000103837	4.97279e-06	0.000111518	4.95434e-06	0.000292742	5.95552e-06
Bra029481	fibrillin	0.000341895	4.51038e-06	0.000592145	0.000885714	0.000848345	0.000532693	0.000912813	0.000799056	0.00113792
Bra029267	Plant invertase/pectin methylesterase inhibitor superfamily protein	0.000463635	0.000285433	0.000360318	0.000392358	0.000214745	0.000300989	0.000213948	0.000316045	0.000192888
Bra009334	hydroxymethylbilane synthase	0.000609887	0.00078849	0.000568774	2.94929e-06	0.000423728	0.000348422	0.000422156	3.32592e-06	3.38311e-06
Bra005575	FUNCTIONS IN: molecular_function unknown; INVOLVED IN: response to cadmium ion; LOCATED IN: plasma membrane; EXPRESSED IN: 25 plant structures; EXPRESSED DURING: 13 growth stages; CONTAINS InterPro DOMAIN/s: Prefoldin (InterPro:IPR009053); BEST Arabidopsis thaliana protein match is: unknown protein (TAIR:AT1G05320.3); Has 470429 Blast hits to 168274 proteins in 4282 species: Archae - 6896; Bacter…	0.000163607	5.03617e-05	9.15471e-05	3.95586e-05	7.57791e-07	3.3988e-05	7.5498e-07	8.02984e-05	9.07547e-07
Bra028744	NAD(P)-binding Rossmann-fold superfamily protein	0.000236225	0.000163609	0.000220301	0.000214188	0.000369272	0.000184027	0.000327024	0.00024154	0.000442248
Bra019748	Aldolase superfamily protein	0.000189875	0.000245479	0.000495812	0.000165275	0.000237454	0.000266254	0.000184001	0.000124254	0.000189586
Bra032612	translocon at the outer envelope membrane of chloroplasts 33	5.22956e-06	9.6586e-05	4.87703e-06	0.000113801	7.26663e-05	8.14798e-05	3.61984e-06	8.55555e-05	4.35134e-06
Bra007120	PDI-like 1-3	2.68252e-06	4.95441e-05	0.000100068	7.78327e-05	0.000130461	0.000167181	0.000111408	0.000131658	8.92813e-05
Bra006395	UDP-glucose pyrophosphorylase 2	0.00036351	3.05171e-06	0.000339006	0.000527358	0.000642865	0.000592115	0.000731977	0.000594702	0.000824902
Bra008769	Rubisco methyltransferase family protein	0.000120401	8.33896e-05	0.000168428	0.000131003	0.000104563	0.000234491	0.000125011	7.38663e-05	5.0091e-05
Bra026733	unknown protein;	0.000806846	0.00079166	0.000799485	0.000548682	0.000735747	0.000785698	0.0006283	0.0005775	0.000755268
Bra039070	photosystem II light harvesting complex gene 2.3	0.00767798	0.00730682	0.0137196	0.00573942	0.00333909	0.00785342	0.00734308	0.0079586	0.00541323
Bra000238	villin 2	0.000164358	1.51778e-06	1.53278e-06	0.000131142	1.1419e-06	0.000179255	0.000204779	0.000349555	0.000246161
Bra034087	adenosine kinase 1	0.000993312	0.00129254	0.00101057	0.00117903	0.00109792	0.000914515	0.0011251	0.00129266	0.00157787
Bra029372	ferredoxin/thioredoxin reductase subunit A (variable subunit) 1	0.00020041	0.000185071	0.000280351	0.000145371	0.000208857	7.80629e-06	6.93607e-06	8.19677e-06	0.000166754
Bra011599	isocitrate dehydrogenase 1	4.23209e-06	3.90818e-06	0.000434149	0.000429776	0.000382241	0.000461571	0.000497999	3.46185e-06	3.52138e-06
Bra027454	INVOLVED IN: biological_process unknown; LOCATED IN: thylakoid, chloroplast thylakoid membrane, chloroplast; EXPRESSED IN: 22 plant structures; EXPRESSED DURING: 13 growth stages; CONTAINS InterPro DOMAIN/s: Twin-arginine translocation pathway, signal sequence (InterPro:IPR006311); Has 30201 Blast hits to 17322 proteins in 780 species: Archae - 12; Bacteria - 1396; Metazoa - 17338; Fungi - 3422; …	0.000208015	0.000320157	0.000258657	0.000251479	0.000240869	0.00016205	9.59903e-05	5.67187e-06	0.000230776
Bra012127	zeaxanthin epoxidase (ZEP) (ABA1)	0.000186009	0.000236187	0.000216838	0.000168657	0.000193849	0.000144907	0.000160942	0.000133136	0.000212812
Bra011878	vacuolar proton ATPase A3	0.000166115	1.91752e-06	1.93647e-06	1.50619e-06	1.44264e-06	0.000226466	0.000143729	0.000186838	0.000207328
Bra016736	S-adenosyl-L-methionine-dependent methyltransferases superfamily protein	0.000183808	0.00016974	0.000128563	9.99965e-05	6.38518e-05	0.00017899	6.36149e-05	0.000112766	3.82351e-06
Bra038088	beta-amylase 5	0.000155942	0.000201609	2.90859e-06	0.000497707	0.000346697	0.00021867	0.000453352	0.000153072	0.000415212
Bra002799	Class II aminoacyl-tRNA and biotin synthetases superfamily protein	0.000162071	0.000149666	0.000100764	0.000137155	1.87669e-06	6.31291e-05	0.000149578	0.000243052	0.000157329
Bra012223	ATPase, V1 complex, subunit B protein	3.29762e-06	0.000791759	3.07533e-06	0.00102856	0.00116845	2.56895e-06	0.00152932	0.0013757	0.00150911
Bra016020	Low PSII Accumulation 3	0.000261772	0.000201447	0.000406876	0.000348115	0.000272805	0.000407857	0.000301992	0.000178441	0.000181509
Bra007404	ketol-acid reductoisomerase	0.000821647	0.00107695	0.00064267	0.000557546	0.000718169	0.000763977	0.000403618	0.000390256	2.20537e-06
Bra027506	Aluminium induced protein with YGL and LRDR motifs	0.000371278	0.000571435	0.000634791	0.000314199	0.00047291	0.000241031	0.000471155	0.00040494	0.000308928
Bra014946	Plastid-lipid associated protein PAP / fibrillin family protein	0.000504643	0.000258899	0.000679791	0.000528742	0.00066226	0.000480495	0.000659803	0.000687996	0.000839792
Bra000481	Histone superfamily protein	0.00437303	0.00612711	0.00450013	0.00328144	0.00303823	0.00446398	0.00344447	0.00481063	0.00589712
Bra005514	heat shock protein 60-2	0.000611269	0.000513167	0.000492327	0.00046355	0.000617729	0.000627715	0.000769296	0.000545474	0.000762924
Bra035235	Peroxidase superfamily protein	4.76435e-06	4.3997e-06	8.88637e-05	0.000172796	6.62021e-05	0.000111347	6.59565e-05	7.79448e-05	3.96425e-06
Bra036092	Transducin/WD40 repeat-like superfamily protein	1.99637e-05	9.21788e-07	1.8618e-05	2.17216e-05	2.77402e-05	3.11047e-05	1.38187e-05	6.53213e-05	5.8139e-05
Bra032668	mago nashi family protein	0.000233561	0.000161763	0.000163362	0.000254127	4.05675e-06	4.54878e-06	0.000161668	4.77631e-06	4.85845e-06
Bra007695	multidrug resistance-associated protein 10	2.02105e-05	9.33183e-07	9.42406e-07	1.46601e-05	7.02079e-07	1.57446e-05	1.39895e-05	3.30644e-05	3.3633e-05
Bra040594	Class I glutamine amidotransferase-like superfamily protein	4.00304e-06	3.69665e-06	0.000149328	0.000174221	0.000111247	3.11849e-06	0.000249377	0.000163724	0.000199847
Bra009404	clathrin adaptor complexes medium subunit family protein	0.000255038	0.000211966	0.000118923	0.000240495	0.000265787	0.000317891	0.000229494	0.000208621	0.000233429
Bra022751	CLPC homologue 1	0.00183907	0.00203797	0.00162155	0.00175846	0.00205597	0.00201879	0.00192105	0.00232492	0.00215623
Bra000403	phosphomannomutase	0.000189412	0.00034983	5.88812e-06	0.000228989	0.000219328	0.000295116	0.000174812	5.16463e-06	5.25344e-06
Bra028155	pfkB-like carbohydrate kinase family protein	0.000201059	0.00018567	9.37527e-05	0.000109381	0.000104766	0.000117473	0.000104378	0.000123349	8.36471e-05
Bra000773	Cupredoxin superfamily protein	0.000451351	0.000514878	0.000470446	0.000385172	0.000571828	0.000413666	0.000367553	0.000347487	0.000441828
Bra027800	Protein kinase protein with tetratricopeptide repeat domain	3.20243e-06	2.95732e-06	5.97311e-05	2.32294e-06	2.22494e-06	9.97917e-05	4.43337e-05	7.85876e-05	0.000106585
Bra033574	rotamase CYP 1	0.000632108	8.33896e-06	8.42139e-06	0.00117903	0.000690119	0.000492431	0.0011251	7.38663e-06	7.51365e-06
Bra023597	rubredoxin family protein	0.00103163	0.000635115	0.00122934	0.000706741	0.000557466	0.000535782	0.000476055	0.000796992	0.000906074
Bra030284	cold, circadian rhythm, and rna binding 2	9.24511e-06	0.000597626	0.000258657	0.000603551	0.000449623	0.000360111	6.39935e-06	0.000378125	7.69254e-06
Bra036818	VPS35 homolog C	1.95861e-06	3.61741e-05	1.82658e-06	2.84143e-05	5.4431e-05	9.15491e-05	4.06718e-05	4.80643e-05	1.62969e-06
Bra020782	peroxiredoxin IIF	0.000154545	0.000285433	0.000360318	0.000448409	0.000375804	0.000361186	0.000534871	0.000252836	0.000578663
Bra030286	acetyl-CoA synthetase	4.16402e-05	1.92266e-06	0.0001165	6.0409e-05	0.000101256	8.10975e-05	0.000115291	0.000102185	0.000242532
Bra009004	L-Aspartase-like family protein	4.95695e-05	3.05171e-05	3.08187e-05	7.19124e-05	5.73987e-05	6.43603e-05	4.57486e-05	1.3516e-06	2.74967e-05
Bra039865	GTP binding	0.000197104	0.000218422	3.67634e-06	0.000343135	0.000328658	0.00033781	0.000463872	0.000322462	0.000229605
Bra035563	trigger factor type chaperone family protein	0.000598473	0.000447397	0.000239198	0.000392769	0.000554397	0.000577235	0.00033535	0.000279743	0.000331979
Bra023418	Ribosomal protein L10 family protein	0.00145157	0.000536188	0.000541487	0.00200055	1.0085e-05	1.13082e-05	1.00476e-05	1.18738e-05	0.00036234
Bra013674	osmotin 34	0.00047066	0.000372546	0.000815161	0.000877892	0.00163499	0.000576178	0.000698111	0.00077	0.000727295
Bra012004	60S acidic ribosomal protein family	1.37449e-05	0.000507717	0.000256368	0.000598209	0.000763961	0.000535387	0.000475704	0.000449734	0.000343101
Bra016672	FAD/NAD(P)-binding oxidoreductase	0.00103545	0.00043029	0.000675957	0.000413097	0.000503578	0.000524322	0.0003942	0.0005082	0.000473861
Bra007589	Remorin family protein	0.000160122	0.000221799	0.000447983	0.000464589	5.56234e-06	0.000374219	5.54171e-06	0.000130979	6.66158e-06
Bra024049	Translation initiation factor 3 protein	0.000276366	0.000102086	0.000257736	8.0187e-05	0.000115206	0.000129179	7.65189e-05	4.52135e-06	0.000137973
Bra031018	FKBP-like peptidyl-prolyl cis-trans isomerase family protein	0.000369804	0.000284584	0.000287397	8.94149e-05	8.56425e-05	0.000336104	8.53247e-05	0.000201667	0.000256418
Bra038942	Cyclophilin-like peptidyl-prolyl cis-trans isomerase family protein	0.000276366	5.10428e-06	5.15473e-06	0.000160374	0.000115206	8.61192e-05	0.000114778	9.0427e-05	0.000137973
Bra013678	cysteine-rich RLK (RECEPTOR-like protein kinase) 10	6.97535e-05	2.14716e-06	2.16838e-06	3.37314e-05	4.84623e-05	5.43402e-05	1.60942e-06	1.90195e-06	3.8693e-05
Bra003126	phenylalanine ammonia-lyase 2	8.78743e-05	2.02872e-06	2.04877e-06	9.5612e-05	0.000106841	8.5571e-05	1.52064e-06	1.79703e-06	0.000146234
Bra040018	Small nuclear ribonucleoprotein family protein	1.38677e-05	0.000384188	1.29328e-05	0.000502959	0.000192696	1.08033e-05	0.000383961	0.000567187	0.000461553
Bra013425	aspartate kinase-homoserine dehydrogenase ii	0.000252413	0.000264173	0.000235397	0.000170886	0.00019875	0.000275292	0.000163069	0.000247768	9.80112e-05
Bra027386	Dihydrolipoamide acetyltransferase, long form protein	3.10636e-06	2.8686e-06	0.000115878	2.25326e-06	0.000129491	0.000169396	0.000129011	0.00015246	0.000258469
Bra015073	glyoxylate reductase 1	0.000268716	0.000347409	0.000300722	0.000350853	0.00033605	0.000544279	0.000334803	0.000439619	0.000357743
Bra035247	Nucleic acid-binding, OB-fold-like protein	1.10155e-05	0.000305171	1.02729e-05	0.000239708	0.000153063	0.000171628	0.000152495	9.01064e-06	9.16558e-06
Bra007675	Carbohydrate-binding-like fold	6.4878e-05	2.39649e-05	1.21009e-06	6.58847e-05	8.1135e-05	5.0542e-05	4.49077e-05	5.30702e-05	7.55759e-05
Bra014436	cysteine synthase C1	0.000717501	3.89756e-06	0.000669134	0.000673527	0.000674434	0.000591835	0.000467431	3.45245e-06	3.51181e-06
Bra034616	D-3-phosphoglycerate dehydrogenase	0.000568551	0.000477305	0.000289214	0.000618614	0.000556605	0.000463052	1.78884e-06	0.000190258	0.000408562
Bra001788	endoribonuclease L-PSP family protein	0.000867698	8.01286e-06	0.000809206	0.000818221	0.000723416	0.000675963	0.000540549	7.09776e-06	7.21982e-06
Bra005998	51 kDa subunit of complex I	3.81616e-06	3.52408e-06	7.11783e-05	0.000110725	0.000132567	2.97291e-06	0.00010566	0.000124865	9.5259e-05
Bra038621	nucleoside diphosphate kinase 2	0.000468632	0.000432763	0.000686779	4.85615e-06	0.000372102	0.00026077	4.63401e-06	0.000492866	5.57046e-06
Bra002804	profilin 3	0.000474253	0.000437955	0.000331713	0.000430011	0.000411868	0.000277093	0.00041034	0.000484924	0.00078922
Bra010820	GDSL-like Lipase/Acylhydrolase superfamily protein	0.00172097	0.00170845	0.00140434	0.00152922	0.000956538	0.00120662	0.00157839	0.0011262	0.00157516
Bra010746	Patched family protein	1.2249e-06	1.13115e-06	3.427e-05	2.66552e-05	1.70204e-05	9.54238e-07	2.54359e-05	6.01183e-05	3.0576e-05
Bra031187	vacuolar proton ATPase A2	0.000151345	0.000104821	1.76429e-06	0.000192117	0.000105149	0.000176854	0.000130949	1.5475e-06	1.57411e-06
Bra014636	beta-1,3-glucanase 2	0.000201059	0.00018567	0.000375011	0.000255223	0.00129212	0.000195789	0.000173963	0.000123349	0.000167294
Bra038784	ribophorin II (RPN2) family protein	0.000143056	0.000113234	5.71768e-05	5.92962e-05	1.41986e-06	6.36829e-05	8.48756e-05	0.000100303	8.50228e-05
Bra011773	Acetamidase/Formamidase family protein	3.43624e-06	0.000126929	0.00016023	0.000199403	0.000262612	0.000160616	0.000190282	0.000281084	0.000200142
Bra013899	Cleavage/polyadenylation specificity factor, 25kDa subunit	7.76589e-06	0.00014343	7.24239e-06	5.63314e-06	5.39547e-06	0.000181496	0.000107509	0.000190575	0.000129235
Bra010818	Metallo-hydrolase/oxidoreductase superfamily protein	0.000221251	0.000163453	0.000123802	6.41953e-05	0.000215204	0.000103417	9.18881e-05	0.00010859	7.3638e-05
Bra018479	Cupredoxin superfamily protein	0.000530095	0.00063638	0.00064267	0.00053832	0.000736584	0.000516201	0.000532042	0.000411937	0.000529289
Bra009583	heat shock cognate protein 70-1	0.00301864	0.00276377	0.00214144	0.00288207	0.0029218	0.00307518	0.00291096	0.00327122	0.00300546
Bra014841	high cyclic electron flow 1	0.00154564	0.00149697	0.00186333	0.00150399	0.00162388	2.93683e-06	0.00112206	3.08374e-06	3.13676e-06
Bra015981	TRAF-like family protein	0.000121977	3.75472e-06	0.000151673	0.000117971	0.000141243	0.000126699	0.000309581	0.000199555	0.000236818
Bra039025	hexokinase 1	0.000124254	2.8686e-06	2.89696e-06	0.000247858	0.000194237	2.41995e-06	0.000193516	0.00022869	0.000155082
Bra018954	FUNCTIONS IN: molecular_function unknown; INVOLVED IN: biological_process unknown; LOCATED IN: chloroplast thylakoid membrane, chloroplast; EXPRESSED IN: 23 plant structures; EXPRESSED DURING: 13 growth stages; BEST Arabidopsis thaliana protein match is: photosystem I P subunit (TAIR:AT2G46820.2); Has 291 Blast hits to 291 proteins in 50 species: Archae - 0; Bacteria - 90; Metazoa - 0; Fungi - 0;…	1.07116e-05	0.000395669	9.98951e-06	0.000388492	0.000595363	0.000333786	0.000222433	8.76207e-06	0.00035651
Bra012596	L-Aspartase-like family protein	0.000117	0.000108045	8.18349e-05	0.00014852	0.000142254	0.00013672	0.000101233	2.39265e-06	7.3014e-05
Bra029577	damaged DNA binding protein 1A	1.43018e-06	2.64144e-05	1.33377e-06	1.03741e-06	4.96821e-05	3.34247e-05	2.96986e-05	3.50967e-05	5.95003e-05
Bra020681	Ribosomal protein L13 family protein	0.000829367	0.000696263	0.000421887	0.000492216	0.000314299	0.000704839	0.000887211	0.000678422	0.000752824
Bra015924	purine biosynthesis 4	0.000122943	0.000132455	9.55461e-05	0.000118905	0.000106771	0.000151646	8.50996e-05	0.000125709	6.81977e-05
Bra030504	nuclear encoded CLP protease 5	0.000155837	4.797e-06	0.000193776	0.000226079	0.000216541	0.000283272	3.59562e-06	0.00025495	4.32223e-06
Bra013714	Tyrosine transaminase family protein	0.000109636	0.000236238	0.000136327	0.000371124	0.000177733	0.00022776	0.000455333	0.000179365	0.000243265
Bra023585	binding partner of acd11 1	6.13905e-06	0.000170075	0.000171756	4.45307e-06	0.000170608	4.78251e-06	0.000169975	0.000150652	0.000204324
Bra009965	Mog1/PsbP/DUF1795-like photosystem II reaction center PsbP family protein	0.000119937	5.53784e-06	0.000111852	0.000130497	8.33278e-05	0.000140151	0.000166037	0.000196216	0.00019959
Bra019430	cyclophilin71	4.99414e-05	4.6119e-05	4.65749e-05	1.8113e-06	1.73488e-06	3.89059e-05	1.72844e-06	4.08521e-05	6.23319e-05
Bra038700	Leucine-rich repeat (LRR) family protein	0.00019116	0.000220662	8.91371e-05	0.000311989	0.000332029	0.00018615	0.000430036	0.000156369	0.000357881
Bra023172	Argonaute family protein	1.49776e-06	2.76625e-05	1.3968e-06	1.08643e-06	2.08119e-05	2.33361e-05	2.07346e-05	6.12584e-05	2.49247e-05
Bra011792	phosphoenolpyruvate carboxykinase 1	2.32164e-06	0.000107197	2.16514e-06	0.000168405	0.00011291	0.000217036	0.000144631	0.000265874	1.93176e-06
Bra028057	2-oxoacid dehydrogenases acyltransferase family protein	0.000273086	0.0004098	0.000254678	0.000222849	0.000237164	0.000292521	0.000165399	0.000279231	0.000227226
Bra030660	photosystem II subunit P-1	0.00511775	0.00357202	0.00593821	0.00427342	0.00367967	0.00412597	0.00346006	0.00442971	0.00306994
Bra000663	ascorbate peroxidase 4	0.000981895	0.000618233	0.000915705	0.00100361	0.00102328	0.000904004	0.000957696	0.000620646	0.000631319
Bra005867	RP non-ATPase subunit 8A	5.04279e-06	0.000186273	9.4057e-05	0.000182894	0.000140142	0.00015714	3.49056e-06	4.125e-06	0.000167837
Bra004743	Aconitase/3-isopropylmalate dehydratase protein	0.000246536	0.000113833	0.000114959	8.94149e-05	8.56425e-05	0.000144045	8.53247e-05	0.000100833	5.12836e-06
Bra033286	pyruvate dehydrogenase E1 alpha	0.000145838	0.000404029	0.000102006	0.000264467	2.53309e-06	0.000198822	2.52369e-06	0.000119296	3.03368e-06
Bra037196	Bifunctional inhibitor/lipid-transfer protein/seed storage 2S albumin superfamily protein	0.00097838	0.000734091	0.000912427	0.00137502	0.00110459	0.000905099	0.00114281	0.00105041	0.000864957
Bra028339	Stress responsive alpha-beta barrel domain protein	0.000286564	0.000158779	0.000267247	0.00041573	0.000318552	0.000267891	0.000476055	0.00023441	0.000381505
Bra037913	light harvesting complex of photosystem II 5	0.00624588	0.005972	0.00819602	0.00633477	0.00407061	0.00538245	0.00638933	0.00755066	0.00538095
Bra013167	cycloartenol synthase 1	4.05001e-05	1.87002e-06	1.8885e-06	2.93775e-05	2.81381e-05	3.15508e-05	1.40168e-06	1.65645e-06	3.36988e-05
Bra018622	unknown protein;	1.12549e-05	1.03935e-05	0.000314887	0.000163279	0.000234586	0.000263038	0.000233715	9.20652e-06	9.36483e-06
Bra022504	methionine S-methyltransferase	5.84451e-05	8.09578e-05	5.45053e-05	5.29928e-05	0.000101514	9.10611e-05	8.091e-05	0.00011952	8.51028e-05
Bra014208	Leucine-rich repeat (LRR) family protein	9.80955e-05	9.05875e-05	3.04943e-06	0.000166029	0.000159025	0.000101893	0.000158434	2.67474e-06	2.72073e-06
Bra023503	voltage dependent anion channel 3	0.00028618	0.000336352	0.000145576	0.000301944	0.000234979	0.000243211	0.000324148	0.000383065	0.000346358
Bra031598	ascorbate peroxidase 1	0.000613905	5.66918e-06	5.72521e-06	0.000712492	0.000767736	0.000717376	0.0006799	0.000703043	5.10809e-06
Bra006315	reversibly glycosylated polypeptide 2	0.000427873	0.000355612	3.9903e-06	0.000527622	0.000683724	0.000399992	0.00065157	0.000595	0.000712037
Bra015668	thylakoidal ascorbate peroxidase	0.000388295	0.000488966	0.000625479	0.000409683	0.000490498	0.000412491	0.000390942	0.000317625	0.000440573
Bra027661	ATP citrate lyase (ACL) family protein	3.68926e-06	3.40689e-06	0.000516085	0.000561976	0.000717688	0.000775993	0.000740562	3.01781e-06	0.000706033
Bra033269	Tetratricopeptide repeat (TPR)-like superfamily protein	5.2561e-05	9.70763e-05	4.08482e-05	3.17718e-05	6.08627e-07	8.18934e-05	6.06368e-07	5.01607e-05	7.28904e-07
Bra005086	P-loop containing nucleoside triphosphate hydrolases superfamily protein	5.17381e-05	3.82226e-05	2.89503e-05	3.00234e-05	7.18917e-07	2.41834e-05	2.14875e-05	5.92505e-05	5.16594e-05
Bra015719	O-methyltransferase family protein	0.000125933	0.000116295	7.82961e-05	9.13482e-05	5.83295e-05	9.8106e-05	2.90565e-06	6.86757e-05	6.98566e-05
Bra011985	chaperonin-60alpha	0.00233641	0.00281957	0.00232747	0.00265769	0.00273002	0.00333001	0.00240747	0.00280161	0.0018115
Bra024238	beta-galactosidase 10	6.28817e-05	5.80689e-05	1.95476e-06	1.52042e-06	1.45627e-06	3.26579e-05	2.90173e-05	3.42915e-05	5.23217e-05
Bra003198	photosystem I light harvesting complex gene 1	0.00199786	0.00172592	0.0021036	0.00261789	0.0016567	0.00230949	0.00258736	0.00226687	0.0024131
Bra011538	cyclase associated protein 1	0.00022793	0.000180415	0.000151832	0.000118095	6.78676e-05	0.000177564	2.25386e-06	0.000133176	8.12797e-05
Bra003389	Rhodanese/Cell cycle control phosphatase superfamily protein	0.000248328	0.000250169	0.000400016	0.000196505	0.000141161	0.000298976	0.000250021	0.000184666	0.000187841
Bra001857	Ribosomal L27e protein family	0.0013806	0.000743712	0.000536474	0.000584177	0.00079933	8.96277e-06	0.00135382	0.00159989	0.000861565
Bra029693	Protein of unknown function, DUF642	0.000382976	0.000353663	0.000238106	0.000462998	0.000532156	0.0003315	0.000412364	0.000313274	0.000318661
Bra006777	oxidoreductases, acting on NADH or NADPH, quinone or similar compound as acceptor	7.46721e-06	6.89568e-06	0.000139277	0.000162494	0.000207518	0.000116344	0.000103374	6.10817e-06	0.000186396
Bra010643	Haloacid dehalogenase-like hydrolase (HAD) superfamily protein	0.000151776	0.00014016	0.000235909	0.000110094	7.02993e-05	0.000157651	0.000175096	8.27687e-05	8.4192e-05
Bra010807	chlorophyll A/B-binding protein 2	0.00971464	0.0089711	0.0183908	0.00776403	0.00436488	0.0103324	0.0103483	0.0101354	0.0077444
Bra011251	Class II aminoacyl-tRNA and biotin synthetases superfamily protein	0.000311202	0.000287383	0.00013192	0.000123129	0.000157245	0.000242436	0.000254575	0.000277705	0.00028248
Bra021914	urease accessory protein G	0.000132185	0.000427239	0.000184912	9.58832e-05	0.000183676	0.000102977	0.000137246	0.000270319	0.000274967
Bra039237	Cytosol aminopeptidase family protein	3.04545e-06	0.000646842	2.84015e-06	2.20907e-06	0.000952143	0.00102017	0.000864289	0.000822088	0.000962925
Bra012422	glutathione S-transferase tau 13	0.00023533	0.000144879	7.31555e-06	0.000284502	0.000326998	0.000244439	0.000325785	0.000256667	0.00013054
Bra017960	unknown protein;	0.000106748	0.000197155	9.95518e-05	7.74315e-05	3.70823e-06	0.000166319	0.000110834	4.36598e-06	4.44106e-06
Bra030069	nuclear transport factor 2B	0.000252549	0.00046644	0.000353287	0.000457979	8.77313e-06	0.000196744	0.000524435	0.000413171	0.000525344
Bra009454	binding to TOMV RNA 1L (long form)	4.65024e-06	0.000429432	0.000346941	0.000337314	0.000387699	0.000289814	0.000321884	3.80389e-06	3.8693e-06
Bra013774	Chaperone protein htpG family protein	0.0007747	0.00108183	0.000669613	0.000890886	0.0013259	0.000971512	0.000994002	0.00108193	0.00103765
Bra011930	Histone superfamily protein	0.00020848	0.000673833	0.000388853	0.000680513	0.00057938	0.000324825	0.000360769	8.52684e-06	0.000260204
Bra032216	gamma carbonic anhydrase 2	0.000225098	0.00020787	0.000209924	0.000204099	0.000117293	4.38396e-06	0.000194763	0.000230163	0.000187297
Bra039756	glutamine synthase clone F11	0.000349029	0.000241736	0.000406876	0.000221528	0.000333428	0.000271904	0.000241594	0.000142753	0.000290415
Bra039151	Insulinase (Peptidase family M16) protein	0.000176164	2.71135e-06	0.000273814	0.000276865	0.000244785	0.000251601	0.000569046	0.000288204	0.00031759
Bra032991	Cytochrome C1 family	0.000505921	0.000373759	0.000471817	0.000330282	0.000281197	0.000472954	0.000385212	0.000579381	0.000463056
Bra004450	fumarase 1	0.000165938	9.19424e-05	0.000154752	9.6293e-05	0.000115288	0.000155125	0.000137832	0.000162885	0.000276143
Bra006038	26S proteasome regulatory subunit, putative (RPN5)	0.000110416	3.39882e-06	0.000137297	0.000160184	0.000127855	0.000200707	0.000178333	0.000120427	0.000244995
Bra000821	Thioredoxin superfamily protein	0.000431439	0.000398417	0.000724239	0.000312952	0.000419648	0.000403325	0.000477818	0.000564667	0.000430782
Bra026591	Nucleotide-diphospho-sugar transferases superfamily protein	0.000225917	5.21564e-06	5.26719e-06	4.09683e-06	0.000196199	8.79981e-05	0.000156377	0.000231	0.000234972
Bra024986	ribosomal protein 1	0.000436956	0.000696975	3.70455e-06	2.8814e-06	2.75983e-06	0.000433239	0.000439935	0.000552391	0.000330524
Bra013215	ribosomal protein L5	0.00102921	0.00108005	0.000698062	0.000780495	0.000585051	0.000911125	0.00071241	0.000688825	0.000739596
Bra000837	photosynthetic electron transfer C	0.00161369	0.00180064	0.00206926	0.00136561	0.00172842	0.00167615	0.0014893	0.00154	0.00173432
Bra033642	NDH-dependent cyclic electron flow 1	0.000132373	0.000122242	0.0001646	6.40129e-05	3.06561e-06	6.87485e-05	6.10847e-05	3.60937e-06	7.34288e-05
Bra007663	Class II aaRS and biotin synthetases superfamily protein	3.02764e-06	2.79591e-06	0.000197648	0.000241577	0.00021035	0.00018869	0.000209569	0.000222895	2.5192e-06
Bra038835	H(+)-ATPase 1	0.000687392	0.000740577	0.000580002	0.000284922	1.13709e-06	0.00054825	0.000532448	0.000575674	0.000558338
Bra005933	TUDOR-SN protein 1	0.000172401	0.000202626	7.30817e-05	0.00015916	0.000130667	0.000170935	0.000206122	0.000243587	0.000195613
Bra035787	TRAF-like family protein	0.00023067	0.000177513	0.000322681	0.000250981	0.000160262	0.000239599	0.000319334	0.000251584	0.000319888
Bra040546	unknown protein;	9.49376e-05	1.75342e-06	7.08302e-05	4.13189e-05	1.31919e-06	2.95837e-05	0.000105143	0.000108722	0.00014219
Bra015501	alpha-crystallin domain 32.1	0.000238951	5.51654e-06	0.000167132	4.33318e-06	4.15037e-06	0.00018615	0.000124049	0.000146596	0.000298234
Bra025037	Glucose-6-phosphate/phosphate translocator-related	0.000305293	0.000246686	0.000320302	0.000138406	2.65134e-06	0.000237833	0.000237735	0.000218513	0.000158765
Bra036422	TCP-1/cpn60 chaperonin family protein	2.85511e-06	0.00031639	2.66264e-06	0.000310651	0.000317381	0.00031139	0.000296441	0.000303612	2.37564e-06
Bra021701	Pre-mRNA-processing-splicing factor	1.32864e-05	5.52126e-05	6.19537e-07	1.92751e-05	9.23092e-06	2.0701e-05	3.67867e-05	9.78144e-05	3.8693e-05
Bra021556	Aldolase-type TIM barrel family protein	0.00393585	0.00425991	0.00426255	0.00448195	0.00367539	0.00448383	0.00366175	0.00398113	0.00380309
Bra035847	adenylate kinase 1	0.000841305	0.000717151	0.000724239	0.000704142	0.000719397	0.000705818	0.000671932	0.0004235	5.38478e-06
Bra001418	Ras-related small GTP-binding family protein	7.5397e-06	0.000348131	7.03145e-06	0.000437525	0.000419066	0.00035242	0.0004697	6.16747e-06	0.000564618
Bra040341	isopropyl malate isomerase large subunit 1	0.000400622	0.000426875	0.000143698	0.000290598	0.000256927	0.000360111	0.000213312	0.000176458	0.000179493
Bra041106	photosynthetic electron transfer A	4.85368e-06	0.000134466	4.5265e-06	3.52071e-06	0.000134887	0.000189058	0.000134386	0.000158812	0.000161543
Bra014317	photosystem I subunit H2	0.000535579	9.89174e-06	9.98951e-06	0.000388492	0.000520942	0.000333786	7.41442e-06	8.76207e-06	0.000713019
Bra035332	proteasome alpha subunit F1	0.000286564	0.000370484	0.000267247	4.1573e-06	0.000358371	0.000223242	3.96713e-06	4.68819e-06	0.000333817
Bra027840	glutathione S-transferase TAU 16	0.00013275	6.12949e-06	0.000123802	0.000144439	0.000276691	0.000155125	0.000137832	0.00010859	0.000165686
Bra031034	Ribosomal protein L6 family protein	0.000663752	0.000796834	0.000557107	0.000577758	4.61152e-06	0.000568791	0.000918881	0.000868718	0.000938885
Bra000547	translocon at the inner envelope membrane of chloroplasts 55-II	0.000143547	0.000185584	0.000267741	0.000104125	9.97315e-05	0.000178924	9.93615e-05	0.00016439	0.000191105
Bra019214	phosphoglucose isomerase 1	0.000329385	0.00011699	0.000283552	0.000275684	0.000369674	0.000493464	0.000438455	0.000269437	0.000316235
Bra008658	tRNA synthetase beta subunit family protein	0.000157417	4.84561e-05	4.89351e-05	5.70926e-05	1.8228e-06	4.08775e-05	7.26413e-05	6.43834e-05	4.36604e-05
Bra006878	metallopeptidase M24 family protein	0.000175611	0.000144151	0.000127379	9.90753e-05	0.000122008	0.000152007	0.000108049	1.59611e-06	9.74131e-05
Bra021678	unknown protein;	0.000359116	0.00033163	0.000251181	0.000195369	0.000187126	0.000279763	0.000186432	0.000293757	0.000373511
Bra015337	lipoyltransferase 2	8.21788e-05	7.5889e-05	3.83195e-06	5.96099e-05	5.7095e-05	9.60297e-05	0.000113766	0.000134444	0.000102567
Bra017201	RNA-binding (RRM/RBD/RNP motifs) family protein	0.000377509	0.000199209	0.00045265	0.000312952	3.74686e-06	0.000294091	3.73296e-06	0.000352917	4.48732e-06
Bra001174	TCP-1/cpn60 chaperonin family protein	0.000139926	5.16865e-05	7.82961e-05	4.05992e-05	5.83295e-05	4.36027e-05	3.8742e-05	0.000137351	0.000279426
Bra021421	Tyrosyl-tRNA synthetase, class Ib, bacterial/mitochondrial	3.12511e-06	8.65776e-05	2.91444e-06	0.000113343	4.34243e-05	0.000146073	6.48948e-05	2.55634e-06	0.000104012
Bra028708	Ribosomal protein S4 (RPS4A) family protein	0.00118563	5.47443e-06	5.52854e-06	4.30011e-06	0.000658989	0.000738916	0.00106688	0.000872862	0.000937198
Bra037782	beta-D-xylosidase 4	2.00152e-06	5.54498e-05	1.8666e-06	5.80736e-05	2.78117e-05	4.67774e-05	1.38543e-06	1.63724e-06	6.66158e-05
Bra031749	Pyruvate phosphate dikinase, PEP/pyruvate binding domain	9.12293e-05	0.000136901	9.57144e-05	8.27186e-07	8.71516e-05	0.000159909	7.89347e-07	0.000111938	9.4886e-07
Bra003781	aldehyde dehydrogenase 10A8	9.30047e-05	8.58863e-05	2.89117e-06	0.000112438	0.000150772	0.000144907	0.000128753	5.07186e-05	0.000128977
Bra013204	Nucleic acid-binding, OB-fold-like protein	0.000428463	0.000296752	0.00039958	0.000310794	0.000223261	0.00025034	7.41442e-06	0.000175241	0.00035651
Bra012788	hydroperoxide lyase 1	0.000571722	0.000586626	0.000622046	0.000691183	0.000573752	0.000544365	0.000857435	0.000597577	0.000660709
Bra020966	RNAse l inhibitor protein 2	0.000205379	0.000165952	0.000119709	0.000167598	1.78363e-06	1.99996e-06	1.77701e-06	0.000168	0.000213611
Bra015499	FTSH protease 8	0.000718233	0.000746168	0.000837271	0.000732634	0.000842068	0.00097917	0.000963232	0.000826192	0.000859075
Bra000757	PGR5-like B	0.000291221	0.000313753	0.000226325	3.52071e-06	0.000134887	0.000113435	0.000134386	3.97031e-06	0.000121158
Bra020000	Translation protein SH3-like family protein	0.000284118	0.000174915	0.000176644	6.86968e-06	6.57985e-06	0.000368895	0.000262217	7.74695e-06	7.88017e-06
Bra003874	germin-like protein 1	0.000600262	0.000623609	0.000419849	0.000489838	0.000834083	5.84529e-06	0.000571304	6.13768e-06	6.24322e-06
Bra004806	Ribosomal protein L30/L7 family protein	6.41809e-06	0.000770493	5.98545e-06	0.000558658	0.000579679	4.99989e-06	0.000666379	0.0005775	0.000694236
Bra014956	cyanase	0.000369804	0.000256125	0.000603533	0.000469428	0.000642318	0.000216067	0.000383961	0.000226875	7.69254e-06
Bra003007	O-methyltransferase 1	0.000170679	0.000197019	0.00011938	0.000216659	0.000177873	0.000299169	0.000147677	0.000174519	0.000248528
Bra033355	HSP20-like chaperones superfamily protein	0.000270118	0.000311805	0.000251909	0.000195935	0.000234586	0.000157823	4.67431e-06	0.000165717	0.000224756
Bra018137	malate dehydrogenase	0.000463635	0.000463829	0.000360318	0.000448409	0.000563706	0.000511681	0.000427897	0.000537276	0.000450071
Bra005337	Plastid-lipid associated protein PAP / fibrillin family protein	0.000258863	0.000358575	0.000321884	0.000219066	0.000209824	0.000302494	0.0003285	0.000247042	0.000215391
Bra037461	cytochrome B5 isoform D	0.000337648	0.000311805	0.000314887	0.000163279	0.000234586	0.000438396	0.000389526	0.000368261	0.000374593
Bra017161	phosphoribosylaminoimidazole carboxylase, putative / AIR carboxylase, putative	4.49545e-05	0.000103784	2.09621e-06	3.26086e-05	3.12328e-05	3.5021e-05	3.1117e-05	1.83864e-06	1.87026e-06
Bra037214	aldehyde dehydrogenase 6B2	5.89442e-05	2.72163e-06	5.49707e-05	4.27563e-05	8.19047e-05	4.59193e-05	0.000102001	4.82163e-05	0.000122614
Bra001090	methionine synthase 2	0.00153546	1.81787e-06	0.00126673	0.00192769	0.00240711	0.00202429	0.00177138	0.00190011	0.00199831
Bra039086	prohibitin 4	0.000223479	0.000361155	5.21035e-06	0.000283683	0.000271715	0.000261146	0.000348051	4.57014e-06	4.64873e-06
Bra030182	chlorophyll A/B binding protein 1	0.00860938	0.00805787	0.017143	0.00717328	0.00396072	0.00951665	0.00958321	0.00942168	0.00687316
Bra013838	26S proteasome, regulatory subunit Rpn7;Proteasome component (PCI) domain	0.000240803	0.00018531	0.00022457	0.000174671	0.000223069	3.12655e-06	0.000305581	0.000229806	0.000300546
Bra032150	TRAF-like family protein	0.000522077	0.000522295	0.000486884	0.000568048	0.000574308	0.00071175	0.00072275	0.000462647	0.000760204
Bra032749	serine hydroxymethyltransferase 4	0.000560595	0.000548141	3.07533e-06	0.000861117	0.0006415	0.000796374	0.000730423	0.000593439	0.000768274
Bra005601	alpha/beta-Hydrolases superfamily protein	0.000167008	0.000154226	0.000311501	0.000201905	0.000270741	0.000216841	0.000385337	0.000273226	0.000231603
Bra028579	Zincin-like metalloproteases family protein	0.00013294	0.000163686	2.0663e-06	0.000176789	0.000184724	0.000207128	1.53365e-06	0.00030811	1.84358e-06
Bra025492	RNA binding Plectin/S10 domain-containing protein	0.00017354	8.01286e-06	8.09206e-06	0.00018882	6.02846e-06	0.000202789	0.000180183	0.000141955	0.000216594
Bra006157	exocyst complex component sec10	1.88036e-06	3.47289e-05	1.75361e-06	4.09187e-05	2.61282e-05	4.39458e-05	1.30156e-06	3.07627e-05	4.69375e-05
Bra018836	Alanyl-tRNA synthetase	0.000113726	0.00024005	0.000136363	0.000106063	0.000135451	0.000139223	0.000168686	0.000252505	0.000148701
Bra031097	profilin 1	1.18563e-05	1.09489e-05	0.00154799	0.00103203	0.00107086	9.23645e-06	0.00106688	0.00135779	0.00118383
Bra024245	histidinol dehydrogenase	0.000165584	0.000152911	0.000185306	0.000192175	0.000161059	0.000283789	0.000160461	0.000108358	0.000192888
Bra020639	ATP citrate lyase subunit B 2	0.000664188	0.000589762	0.000524121	0.000833853	1.77483e-06	1.99009e-06	1.76824e-06	0.000522409	0.000616416
Bra013847	thylakoid lumenal 17.9 kDa protein, chloroplast	0.000127834	0.000177074	0.000119216	9.27266e-05	0.000133222	9.95864e-05	0.000132727	0.000104568	0.000159549
Bra000472	pleckstrin homologue 1	0.000321347	0.000197835	0.000299685	7.76985e-06	0.000223261	0.000166893	0.000148288	0.000175241	0.000267382
Bra010849	non-ATPase subunit 9	0.000111206	3.42315e-06	3.45699e-06	0.000161331	7.72622e-05	0.000115511	0.000205268	0.000121289	3.08436e-06
Bra016866	phosphoenolpyruvate carboxylase 2	1.61118e-06	0.000743932	0.000856466	0.00102846	0.00118656	0.00120495	0.000992563	0.00105436	0.00101886
Bra007192	sedoheptulose-bisphosphatase	0.00181797	0.00156934	0.00195342	0.0014047	0.00162002	0.00178571	0.00120366	0.00132546	3.28841e-06
Bra030666	translocon at the inner envelope membrane of chloroplasts 110	0.000413977	0.000396451	0.000328875	0.000311407	0.000319574	0.000525556	0.000275937	0.000376259	0.000229637
Bra000915	Albino or Glassy Yellow 1	0.000237247	0.000175271	0.000147503	9.17823e-05	0.000120876	0.000172501	0.00010948	0.000207006	0.000131604
Bra000157	eukaryotic translation initiation factor 2	0.000159029	0.000146857	9.88723e-05	3.84515e-06	0.000184146	4.12961e-06	0.00014677	4.33618e-06	8.82148e-05
Bra028187	general regulatory factor 3	0.00235696	0.00251142	0.00247989	0.00179734	0.00256128	0.00240112	0.00234261	0.00266953	0.00291658
Bra026009	rhamnose biosynthesis 1	0.000277353	0.000362844	0.000237102	0.000251479	0.000176638	0.000234072	0.000207979	0.000434844	0.000307702
Bra000377	Bifunctional inhibitor/lipid-transfer protein/seed storage 2S albumin superfamily protein	0.0013042	0.00153284	0.00165856	0.00172004	0.000823737	0.000646551	0.000984816	0.00155176	0.00138113
Bra024659	glutathione S-transferase tau 13	0.000136844	6.31851e-06	0.000127619	0.000248156	0.000332761	5.33028e-06	0.000378887	0.000447753	0.00034159
Bra016702	ssDNA-binding transcriptional regulator	0.000230956	0.000213279	0.000107694	0.000251292	0.00024069	0.000224902	0.000279763	0.000236152	0.000192171
Bra030799	Phosphoglycerate mutase, 2,3-bisphosphoglycerate-independent	0.000250962	2.57505e-06	0.000130025	0.000202267	0.0002906	0.000304123	0.000308823	0.000205287	0.00011601
Bra030546	prohibitin 2	0.000323579	0.000348615	0.000251472	0.00039119	0.000374686	0.000462143	0.000261307	0.00048526	0.000583351
Bra013148	alanine:glyoxylate aminotransferase	3.87326e-06	0.00171687	0.00198669	0.00280955	0.00285247	0.002776	0.00243973	0.00183763	0.00186923
Bra007604	cysteine synthase C1	0.00122397	0.00113029	0.000905299	0.00107152	0.00120225	0.00111791	0.000847219	0.00093216	0.00112378
Bra029854	homolog of anti-oxidant 1	0.00122619	0.00113234	0.000571768	0.000592962	0.000425959	0.000636829	0.000424378	0.000501513	0.00119032
Bra017321	RNA-binding (RRM/RBD/RNP motifs) family protein	0.000204366	9.4362e-05	4.76473e-06	7.41202e-05	7.09931e-05	7.96036e-05	3.53648e-06	8.35855e-05	4.25114e-06
Bra040927	outer plastid envelope protein 16-1	0.00146922	0.00106604	0.00117444	0.000989605	0.00080203	0.00130808	0.000871696	0.00094429	8.73207e-06
Bra034356	alpha/beta-Hydrolases superfamily protein	2.42306e-06	0.00022376	2.25972e-06	0.000175761	0.000134676	0.000169887	0.000184493	9.91029e-05	2.01614e-06
Bra006227	Glycosyl hydrolase family 38 protein	4.56817e-05	4.21853e-05	7.10038e-05	5.52268e-05	0.000105794	7.1175e-05	9.4861e-05	7.47353e-05	5.06803e-05
Bra009536	adenosine kinase 2	0.00135452	0.00133423	0.00109478	0.00134278	0.00100381	0.00116073	0.00115635	0.00144039	0.00176571
Bra040119	Ribosomal protein S3Ae	0.00142821	0.00148376	0.000721464	0.000863316	0.000826893	0.000880824	0.00098859	0.00107092	0.0012874
Bra028727	ubiquitin-specific protease 12	1.36483e-06	7.56222e-05	1.27283e-06	5.94004e-05	7.5859e-05	6.37948e-05	6.61304e-05	1.11643e-06	0.000102207
Bra000474	glutathione S-transferase tau 5	0.00083206	0.000512251	0.000581978	0.000905326	0.00125252	0.000648201	0.0010079	0.000680625	0.000634635
Bra030522	FZO-like	3.41734e-05	6.31156e-05	3.18697e-05	1.23941e-06	1.18712e-06	5.32442e-05	5.91359e-05	4.19307e-05	1.42172e-06
Bra015883	ADP-glucose pyrophosphorylase family protein	0.000300858	6.94577e-05	0.000175361	2.72791e-06	0.000130641	8.78916e-05	0.000130156	9.22881e-05	0.000125167
Bra017452	ribosomal protein S17	0.00113253	0.00134466	0.000905299	0.000586785	0.000449623	0.000378117	1.11989e-05	0.000794062	0.000673097
Bra005425	light-harvesting chlorophyll-protein complex II subunit B1	0.0095176	0.00878914	0.0181877	0.00821676	0.00450299	0.0105986	0.010468	0.01089	0.00816219
Bra021275	pyrimidine 1	7.32631e-05	3.38279e-06	6.83245e-05	7.97142e-05	7.63511e-05	2.85371e-06	0.000202847	8.98939e-05	0.000152399
Bra005736	isocitrate dehydrogenase V	0.000167911	0.000116295	0.000234888	3.04494e-06	2.91647e-06	0.000261616	2.90565e-06	0.000377716	3.49283e-06
Bra010717	fructose-bisphosphate aldolase 2	0.0052563	0.00551093	0.00519683	0.0042141	0.00475021	0.0052032	0.00344686	3.23282e-06	0.00417629
Bra024922	binding	1.9116e-05	1.76529e-05	8.91371e-07	1.38662e-05	1.32812e-05	1.4892e-05	3.30797e-05	3.12738e-05	1.59058e-05
Bra007180	Translation initiation factor IF6	0.00012679	5.85429e-06	5.91216e-06	0.000183939	0.000176179	4.93867e-06	0.000175525	0.000103714	0.000105498
Bra040435	Chalcone-flavanone isomerase family protein	0.000162353	9.99513e-05	0.000100939	0.000157021	0.000150397	0.000168638	0.000112379	0.000132805	4.50295e-06
Bra039823	thioglucoside glucohydrolase 1	2.81373e-06	0.000233854	2.62406e-06	0.000265329	0.000254135	0.000131519	0.000331097	2.30163e-06	0.000304357
Bra011314	aspartate aminotransferase 5	0.000343033	1.75988e-06	0.000302137	0.000373239	0.000503136	0.000445389	0.000290209	0.000374135	0.000380568
Bra022360	RAB GTPase homolog G3F	0.000452382	0.000348131	0.000492201	0.000492216	0.000471449	5.87366e-06	0.000782833	0.000740097	0.000564618
Bra024005	Coatomer, beta subunit	0.000180221	0.000211817	9.16759e-05	9.50741e-05	0.000193509	0.000178688	0.000192791	0.000335047	0.000190853
Bra028321	alpha/beta-Hydrolases superfamily protein	6.49866e-06	0.000180038	0.000242423	0.000235696	0.000316053	0.000202506	0.000269897	0.000159477	0.000324439
Bra001547	pectin methylesterase 3	0.000262805	0.000218422	0.000196072	0.000190631	0.000255623	0.000163787	0.000236484	0.000236472	0.000262405
Bra026055	mercaptopyruvate sulfurtransferase 1	0.000122619	7.54896e-05	7.62357e-05	8.89443e-05	2.83972e-06	9.55243e-05	0.000113167	3.34342e-06	3.40091e-06
Bra004293	Thioesterase superfamily protein	0.000232977	0.00014343	0.000217272	0.000168994	0.000161864	0.000120997	0.000161264	0.000190575	0.000129235
Bra007130	glutathione transferase lambda 2	0.000157417	0.000193825	0.000146805	0.000152247	0.000218735	0.00016351	0.000145283	8.58446e-05	0.000174641
Bra017751	Serine carboxypeptidase S28 family protein	0.000123024	2.8402e-06	8.60482e-05	0.000111547	0.000106841	9.58396e-05	0.000106445	0.00015095	0.000127955
Bra034814	Dihydroneopterin aldolase	1.0424e-05	9.62619e-06	0.000194427	0.00030245	0.000144845	0.000162413	0.000288615	8.52684e-06	0.000346939
Bra012916	Translation protein SH3-like family protein	0.000957439	0.000785919	0.000297633	0.000694496	0.000960838	0.000745875	0.000736364	0.00139233	0.0010622
Bra000785	fibrillin	0.000569974	0.000219312	0.000841624	0.000930243	0.000824996	0.000592036	0.000821935	0.000582798	0.000948512
Bra032172	poly(A) binding protein 4	7.2353e-05	8.90871e-05	4.49838e-05	3.49884e-05	1.67561e-06	7.51537e-05	5.00819e-05	3.94565e-05	8.027e-05
Bra030380	alpha/beta-Hydrolases superfamily protein	0.000247848	0.000305171	0.00023114	0.000269672	0.000200895	0.000257441	0.000114371	0.000236529	0.000240597
Bra006272	Heavy metal transport/detoxification superfamily protein	0.000512037	0.000551654	0.000397934	0.000309513	0.000296455	0.000531857	0.000354426	0.000628269	0.000568065
Bra002728	Haloacid dehalogenase-like hydrolase (HAD) superfamily protein	0.000130519	0.000180794	0.000121721	9.46746e-05	0.00013602	0.000152518	0.000135516	0.000106765	5.43003e-06
Bra008476	P-loop containing nucleoside triphosphate hydrolases superfamily protein	0.000543782	0.000470777	0.000443735	0.000443748	0.000448639	0.000556006	0.000517549	0.00030581	0.000395905
Bra011609	Uncharacterised conserved protein (UCP030210)	4.23209e-06	0.000117245	3.94681e-06	0.000122793	5.88063e-05	9.8908e-05	0.000117176	6.9237e-05	3.52138e-06
Bra003047	YELLOW STRIPE like 3	9.64707e-05	0.000124722	5.39806e-05	0.000111963	0.000174264	7.51537e-05	0.000120197	0.000157826	0.000128432
Bra003645	glutathione S-transferase TAU 20	0.000456817	0.000421853	0.000213012	0.000441815	0.000317381	0.000533812	0.000527005	0.000747353	0.000380102
Bra029106	NADH-ubiquinone oxidoreductase-related	0.000456817	0.000337483	0.000255614	0.000198817	6.34762e-06	0.0002847	6.32407e-06	0.000149471	0.000152041
Bra012397	MLP-like protein 423	0.00163493	0.00100653	0.000635298	0.000691789	0.000946574	0.000955243	0.00113167	0.00133737	0.001247
Bra037480	receptor-like protein kinase-related family protein	0.000119018	0.000164862	0.000388481	0.000302161	0.00053748	0.000278155	0.000370721	9.73563e-05	0.000198061
Bra013507	ribophorin II (RPN2) family protein	0.000111579	0.000123647	2.08115e-06	9.71231e-05	0.000124034	8.69234e-05	0.000169914	0.000164289	0.000129977
Bra004504	photosystem I P subunit	0.000424366	0.000235131	7.91518e-06	0.000492515	0.000353802	0.000264475	0.000234993	0.000485984	0.00042372
Bra008953	catalytics	5.02322e-05	4.63875e-05	9.3692e-07	5.10116e-05	4.88594e-05	4.69589e-05	5.56321e-05	6.57438e-05	5.01558e-05
Bra016548	3-phosphoserine phosphatase	8.39556e-05	7.75298e-05	0.000117444	9.13482e-05	8.74942e-05	6.5404e-05	5.8113e-05	3.43378e-06	0.000104785
Bra031785	Glycine cleavage T-protein family	3.80681e-06	0.0015468	0.00159759	0.00190533	0.0016927	0.00183869	0.00197627	0.00161926	0.00183716
Bra024139	atypical CYS HIS rich thioredoxin 2	0.000258863	0.000179288	0.000241413	0.000140828	8.99246e-05	0.000151247	0.000179182	0.000158812	5.38478e-06
Bra012474	ARM repeat superfamily protein	0.000132524	0.000122381	7.41542e-05	0.00013458	0.000147317	0.000144536	0.000110078	0.000173447	0.000110269
Bra018425	ATP-citrate lyase A-1	0.000183591	0.000135631	3.4243e-06	0.000213074	0.000127553	0.000143023	0.000177911	0.000180213	0.000213864
Bra025305	ribosomal protein L12-A	0.000575251	0.000910668	0.000766391	0.000596099	0.000628045	0.000640198	0.000682598	6.72222e-06	0.000547025
Bra031383	general regulatory factor 10	0.00141198	0.00181414	0.00114504	0.00160311	0.00191934	0.00167388	0.00157227	0.00140609	0.00168567
Bra008581	Zinc-binding dehydrogenase family protein	0.000180602	4.16948e-06	8.42139e-05	0.000163754	6.27381e-05	0.000175868	0.000187516	0.000147733	0.000150273
Bra014024	Chlorophyll A-B binding family protein	0.00246164	0.00162374	0.00355287	0.0032736	0.00366485	0.00333314	0.00357011	0.0028766	0.00199948
Bra003565	tetratricopeptide repeat (TPR)-containing protein	4.79969e-05	7.09173e-05	2.68568e-05	2.78524e-05	3.33466e-05	5.23475e-05	3.32228e-05	9.42274e-05	8.78604e-05
Bra015636	Glycosyl hydrolase family protein	0.000100987	1.86515e-06	1.88359e-06	1.46506e-06	7.01622e-05	9.44063e-05	5.59215e-05	9.91287e-05	6.72222e-05
Bra007342	adenylosuccinate synthase	0.000221883	0.000263443	8.86824e-05	0.000206932	0.000352358	0.000271627	0.000175525	0.000207429	0.000210995
Bra020005	Translation elongation factor EF1B, gamma chain	0.00116582	0.00111132	0.000841731	0.00106389	0.00138479	0.00123048	0.00111934	0.00107669	0.00137683
Bra032124	Translation initiation factor 3 protein	0.000263251	0.000194482	9.82019e-05	7.63815e-05	0.000109738	0.000164064	0.000109331	0.000129203	0.000131425
Bra030155	GDSL-like Lipase/Acylhydrolase superfamily protein	0.000341358	0.000315231	0.000159173	0.000154757	0.000177873	0.000232687	0.000236284	0.000209423	0.000284032
Bra018940	myrosinase-binding protein 2	0.00201558	0.00212895	0.00180599	0.00193983	0.00157425	0.0022578	0.00227967	0.00203668	0.00227997
Bra027936	calreticulin 1a	0.000220309	0.000237355	3.4243e-06	0.000292976	0.000331637	0.000314651	0.000127079	3.00355e-06	0.000122208
Bra039167	auxin transport protein (BIG)	6.45812e-06	2.98192e-07	6.02278e-06	4.68452e-06	4.48688e-06	1.00622e-05	6.70535e-06	7.92412e-06	8.06038e-06
Bra034824	Thioredoxin superfamily protein	0.00243986	5.49541e-06	0.00266387	0.00276261	0.00339026	0.0025034	0.002801	0.00316408	0.00257479
Bra014340	Aldolase superfamily protein	0.000439202	0.000331844	3.7236e-06	0.000260659	0.000499324	0.000497676	0.000276373	0.000653213	0.000531557
Bra019518	chloroplastic lipocalin	0.000269337	0.000207269	0.000334908	0.000195369	0.000218314	0.000244792	0.000279648	0.000257038	0.000224106
Bra005673	Tautomerase/MIF superfamily protein	0.000953706	0.00125816	0.00114354	0.000790616	0.000473287	0.000636829	9.43062e-06	0.00100303	0.000680183
Bra010419	aconitase 2	3.12197e-05	1.44151e-06	4.36727e-05	1.13229e-06	4.33807e-05	1.21605e-06	2.16099e-05	2.55377e-05	3.89652e-05
Bra005687	Aldolase-type TIM barrel family protein	0.000804235	4.64175e-06	4.68763e-06	3.64604e-06	0.000628599	3.91577e-06	0.000208756	0.000411165	0.000292765
Bra004950	plasma membrane intrinsic protein 1B	5.43069e-06	5.01504e-06	0.00167132	0.0010636	0.000679151	0.00101536	0.00127808	0.00111058	4.5187e-06
Bra031197	SMAD/FHA domain-containing protein	0.000291677	0.000269352	6.80037e-06	0.00031736	0.000151985	0.000284032	0.00040379	0.000357887	0.000303368
Bra012809	ATP synthase D chain, mitochondrial	0.000277353	0.0003415	0.000344876	6.70612e-06	0.000385391	0.000216067	0.000319968	0.000378125	0.000230776
Bra022029	3-ketoacyl-acyl carrier protein synthase I	3.29063e-06	0.000455816	0.000306881	0.000334169	0.000457244	0.000410161	0.000478324	0.000403761	0.000355943
Bra038675	lysyl-tRNA synthetase 1	0.000201059	0.00018567	0.000117191	3.64604e-05	5.23832e-05	9.78944e-05	1.73963e-06	0.000164466	8.36471e-05
Bra018017	breast basic conserved 1	0.000980161	0.000905142	0.000703145	0.000765669	0.000680982	0.00105726	5.21889e-06	0.000801772	0.000752824
Bra030661	NAD(P)-linked oxidoreductase superfamily protein	0.000164794	0.000114135	0.000230527	0.000119536	5.72464e-05	0.000128379	0.000114068	0.000134801	3.42798e-06
Bra004901	ribosomal protein S13A	0.00144003	0.00161478	0.000767406	0.000820722	0.000357316	0.00112183	0.000996773	0.000420695	0.00102703
Bra006960	Aldolase superfamily protein	0.00238318	0.002049	0.00168606	0.00193732	2.85475e-06	0.00182456	0.00196247	0.00191583	0.00235905
Bra000743	eukaryotic translation initiation factor 3A	0.000126532	0.000175271	2.95006e-05	8.03095e-05	1.09887e-06	9.85722e-05	9.85318e-05	0.000168192	0.000105283
Bra034172	Cleavage and polyadenylation specificity factor (CPSF) A subunit protein	2.55878e-05	7.08881e-05	3.57944e-05	1.85606e-05	4.44438e-05	2.99005e-05	1.77116e-05	5.2327e-05	1.06454e-06
Bra024620	spermidine synthase 1	0.000496656	0.000291864	0.000294749	0.000458511	0.000407797	0.000457258	0.00046879	0.000369331	0.000375682
Bra021431	Ribosomal protein S7e family protein	0.000575251	0.00036777	0.000330138	0.000449367	0.000368921	0.000413666	0.000428811	0.000579145	0.000515466
Bra017855	xyloglucan endotransglucosylase/hydrolase 7	0.000425528	0.000638559	0.00054566	0.000385831	0.00062824	0.00049725	0.000957273	0.000435103	0.000796652
Bra024798	Ribosomal protein S5/Elongation factor G/III/V family protein	7.89217e-05	0.000102034	2.94406e-05	8.01463e-05	9.86977e-05	9.83719e-05	7.64801e-05	0.000129116	9.19353e-05
Bra010668	SAP domain-containing protein	0.000156098	0.000120126	9.70505e-05	7.54859e-05	3.61506e-05	0.000141873	1.80082e-06	6.38442e-05	0.000129884
Bra032410	Coatomer epsilon subunit	5.30095e-06	0.000195809	0.000148308	0.000192257	0.000220975	0.000123888	0.000220155	0.000130085	0.000220537
Bra020523	thioglucoside glucohydrolase 1	0.000964392	0.000937452	4.73359e-06	0.00136226	0.000705291	0.000593125	0.00126481	0.000788872	0.00164711
Bra036710	Ribosomal L28e protein family	0.00119475	0.00180541	0.00091163	0.00102421	0.00113192	8.46136e-06	0.000977356	0.000799615	0.00126523
Bra020019	NAD(P)-binding Rossmann-fold superfamily protein	0.000238218	0.000131991	4.44319e-06	0.000207355	0.000132404	0.00025981	0.000164891	0.00015589	0.000237855
Bra025858	Phosphofructokinase family protein	2.50917e-06	9.26851e-05	2.34003e-06	5.46023e-05	8.71644e-05	3.90945e-05	5.21046e-05	2.0525e-06	6.26339e-05
Bra027685	6-phosphogluconate dehydrogenase family protein	0.000382713	0.000382873	0.000327172	0.000254474	2.2158e-06	0.000422373	0.000286985	0.000286971	0.000371517
Bra008241	SKU5 similar 5	0.000311769	0.00023556	0.000185025	0.000267266	0.000452905	0.000242878	0.000274658	0.000255027	2.3583e-06
Bra003397	methylenetetrahydrofolate reductase 1	0.000708375	0.00062993	0.000464883	0.00087542	0.00061975	0.000735795	0.000726413	0.000686757	0.000523924
Bra005211	Thioredoxin superfamily protein	0.000128895	5.95146e-06	6.01028e-06	0.000186992	4.47757e-06	0.000100413	8.92192e-05	0.000105436	0.000107249
Bra034166	Clathrin, heavy chain	0.000396876	0.000475459	0.000260086	0.000381248	0.000432234	0.000434521	0.000408356	0.00052645	0.000455177
Bra036771	acetyl-CoA carboxylase 1	4.17334e-05	4.49624e-05	1.29734e-05	2.01814e-05	3.86599e-05	4.87674e-05	4.81456e-05	6.82758e-05	4.05124e-05
Bra019797	glyceraldehyde 3-phosphate dehydrogenase A subunit 2	0.00689004	0.00611106	0.00631667	0.00553431	0.00570649	0.00588308	0.0055506	0.00646395	3.23897e-06
Bra023169	aspartate kinase-homoserine dehydrogenase i	0.000136693	0.000189347	7.96743e-05	7.43649e-05	8.30986e-05	0.00013311	0.000106445	8.38614e-05	8.53034e-05
Bra004730	Phosphoribosyltransferase family protein	0.000181129	4.18164e-06	4.22297e-06	0.000164231	6.2921e-05	7.05524e-05	0.000188063	3.70408e-06	3.76778e-06
Bra038716	Nascent polypeptide-associated complex (NAC), alpha subunit family protein	0.000817463	0.00097058	0.000544541	8.47088e-06	0.000730215	0.000727804	0.000646671	0.000859737	0.000680183
Bra035228	Adaptin family protein	8.63837e-05	0.00014359	6.44484e-05	0.00012532	0.000120033	0.000134591	0.000107629	0.000197853	0.000100628
Bra007214	rotamase cyclophilin 2	0.000256018	0.000236423	0.00023876	0.000185708	0.000237164	0.000199446	0.000177213	0.000279231	0.000142016
Bra001550	Aldolase-type TIM barrel family protein	4.23209e-06	0.00332195	0.00315745	0.0035303	0.00294031	0.00359366	0.00310517	0.00321952	0.00295796
Bra036257	cullin 1	4.7257e-05	5.81867e-05	2.93809e-05	1.14262e-06	4.37767e-05	4.90862e-05	6.54214e-05	3.86562e-05	5.24279e-05
Bra001637	translationally controlled tumor protein	0.000739609	8.53751e-06	0.000689752	0.000737673	0.000899246	0.000864267	0.000447955	0.000605	0.000692329
Bra028393	oxoprolinase 1	0.000122781	0.000102045	0.000125955	5.34369e-05	9.38343e-05	0.000124345	9.34862e-05	0.000160696	0.000102162
Bra021549	pectin methylesterase 3	0.000393542	0.000484561	0.000513818	1.90309e-06	0.000528611	0.000367898	0.000381367	0.000321917	0.000611245
Bra006567	germin 3	0.0021347	0.00169941	0.0018535	0.00186881	0.00178997	5.73448e-06	0.00193618	0.0018064	0.00146997
Bra012346	CYTOCHROME C-1	0.00041603	0.000256125	0.000258657	0.000201184	0.000192696	1.08033e-05	0.000191981	0.000226875	1.15388e-05
Bra012807	chloroplast RNA-binding protein 33	0.000248112	0.000229122	0.000185109	0.000143978	0.000206855	0.000115972	6.86959e-05	0.000202955	0.000206445
Bra027866	Disease resistance protein (CC-NBS-LRR class) family	5.01565e-05	4.63176e-05	1.55918e-06	4.85093e-05	5.80783e-05	5.20979e-05	4.62903e-05	6.838e-05	2.78223e-05
Bra018006	peroxidase CB	4.38751e-06	8.1034e-05	8.18349e-05	6.36513e-05	9.14487e-05	6.83601e-05	6.07396e-05	0.000107669	0.000109521
Bra040433	chloroplast stem-loop binding protein of 41 kDa	0.00109493	0.00101113	0.000983301	0.000882476	0.000986118	0.000821392	0.000617546	0.00112786	0.000843569
Bra039746	cytosolic NADP+-dependent isocitrate dehydrogenase	0.000904764	0.000939955	0.00112503	0.00123054	0.00170246	0.0012041	0.00130472	3.08374e-06	0.00112924
Bra009895	TRAF-like family protein	0.000399389	0.000532741	4.13851e-06	0.000450651	0.000369975	0.000311136	0.000552904	0.0004356	0.000590787
Bra003649	general regulatory factor 2	0.00250898	0.00226178	5.57107e-06	0.00194993	0.00253172	0.00237341	0.00227423	0.00215008	0.0026344
Bra000476	NAD-dependent epimerase/dehydratase family protein	0.000118563	0.000109489	5.52854e-06	0.000258006	0.000288308	0.000138547	0.00020517	4.84924e-06	0.000147979
Bra004778	Plant stearoyl-acyl-carrier-protein desaturase family protein	3.87326e-06	0.000500754	3.61217e-06	0.000280955	2.69101e-06	0.000362087	0.000294913	0.0001901	0.000290053
Bra023845	Pyridoxal phosphate (PLP)-dependent transferases superfamily protein	9.30047e-05	0.000143144	8.67352e-05	0.000224876	0.000129233	2.41512e-06	0.000214589	0.000202874	0.000206363
Bra010787	Glutathione S-transferase, C-terminal-like;Translation elongation factor EF1B/ribosomal protein S6	0.000796502	0.000429065	6.19008e-06	0.000577758	0.000553382	0.000568791	0.000643217	0.000542949	0.000552285
Bra025392	Glycosyl transferase, family 35	0.000275042	0.000358575	0.000347031	0.000387278	0.000224811	0.000365513	0.000212778	0.000304391	0.000269239
Bra009922	Threonyl-tRNA synthetase	2.1632e-06	3.99527e-05	6.05214e-05	1.56912e-06	7.51459e-05	6.7408e-05	5.98937e-05	0.000159255	8.99963e-05
Bra008961	Mog1/PsbP/DUF1795-like photosystem II reaction center PsbP family protein	0.000261478	0.000193172	9.75406e-05	7.58672e-05	7.26663e-05	0.00016296	0.000108595	0.000171111	4.35134e-06
Bra013602	Plastid-lipid associated protein PAP / fibrillin family protein	0.000243445	4.49624e-06	0.000227034	0.000247222	0.000236792	0.000265512	0.000202211	0.00015931	0.000283587
Bra018112	Galactose mutarotase-like superfamily protein	8.70128e-05	4.01765e-06	8.11473e-05	0.000157791	0.000211587	0.000169464	0.000240917	3.55882e-06	0.000108601
Bra015850	Ribosomal protein L31	0.000528292	0.00107329	0.00049268	0.000766413	0.00066067	0.000576178	0.000365677	0.000691428	0.000439574
Bra032951	NAD(P)-binding Rossmann-fold superfamily protein	0.000106748	0.000197155	9.95518e-05	3.87157e-06	0.000370823	8.31597e-05	0.000295558	0.000218299	0.000177642
Bra004989	light harvesting complex photosystem II	0.00219471	0.00187083	0.0030439	0.00326559	0.00230676	0.00315645	0.0030383	0.00262386	0.00238803
Bra029752	Ribosomal protein L10 family protein	4.8086e-06	0.00204266	0.0012108	0.00163937	0.00146997	0.00164826	0.00123153	0.00153404	0.0014804
Bra023564	thioredoxin F2	0.000166115	0.000230102	0.000232376	0.00024099	5.77056e-06	0.000194114	0.000229966	0.000203823	0.000207328
Bra035054	Ribosomal protein L13 family protein	0.000388295	0.000597626	0.00036212	0.0003286	0.000449623	0.000252078	0.000313568	0.0004235	0.000376935
Bra029780	Ribosomal protein L4/L1 family	0.00087988	0.0010245	0.000499475	0.000749235	2.65787e-06	0.00077486	0.000767922	0.000563276	0.000763949
Bra013863	Fe superoxide dismutase 1	0.000952421	6.76557e-06	0.00102487	0.000637714	0.000967113	0.000913188	0.00101424	0.00107873	0.00103632
Bra025459	tRNA synthetase class I (I, L, M and V) family protein	7.93113e-05	0.000122068	8.62923e-05	5.75299e-05	0.000101022	8.23812e-05	0.000100647	0.000108128	8.79896e-05
Bra036168	Lactoylglutathione lyase / glyoxalase I family protein	0.000300615	9.25356e-06	9.34502e-06	0.000218057	0.000208857	0.000156126	0.000416164	8.19677e-06	0.000250132
Bra008159	alpha/beta-Hydrolases superfamily protein	4.16402e-06	7.69063e-05	7.76664e-05	0.000120818	0.000289302	6.4878e-05	5.76456e-05	3.40617e-06	0.000138589
Bra040520	carbonic anhydrase 1	0.0061101	0.00551323	0.00587221	0.00548089	0.00661067	0.00505064	0.00568216	0.00526513	0.00485115
Bra034943	SKU5-similar 6	0.000257908	0.000344021	0.000240522	0.000270224	0.000338462	0.000200918	0.000337206	2.3441e-06	0.00023844
Bra030300	vacuolar proton ATPase A2	0.0001519	0.000140274	0.000106245	0.000179048	1.31919e-06	0.000133127	0.000118286	0.000186381	0.000189586
Bra016487	Pseudouridine synthase/archaeosine transglycosylase-like family protein	0.000144147	0.000133114	0.000201644	0.000130699	2.5037e-06	0.000168442	2.49441e-06	5.89559e-05	8.99546e-05
Bra033975	alpha-fucosidase 1	3.52995e-06	6.51955e-05	0.00019752	0.000204841	0.000269774	0.000137497	0.000146603	2.8875e-06	0.000117486
Bra001152	regulatory particle triple-A ATPase 5A	0.000293053	0.000169139	0.000239136	0.000239143	0.000254504	0.000256834	0.000228203	0.000209752	0.000182879
Bra038640	gamma carbonic anhydrase like 1	0.00030817	0.000284584	5.74793e-06	0.000134122	0.000128464	0.000144045	0.000255974	0.000504167	0.000307702
Bra027338	Aldolase-type TIM barrel family protein	4.19778e-06	0.00333378	0.00344503	0.00334943	0.00288731	0.00349911	0.00281848	0.00302173	0.00300383
Bra009181	2-cysteine peroxiredoxin B	0.00265599	0.00266599	0.00301542	0.00284798	0.00357024	0.00283377	0.00311736	0.00363675	0.00273843
Bra000334	unknown protein;	0.000276366	5.10428e-06	0.000206189	0.000200468	0.000230412	0.000172238	0.000306076	0.000226068	0.000229955
Bra039648	tubulin alpha-2 chain	0.00289927	0.00309172	0.00196349	0.00272894	0.00299749	0.00314593	0.00241298	0.0022022	0.00284316
Bra014131	Ribosomal L18p/L5e family protein	0.000454146	0.000419386	0.000169413	0.000329423	0.00012621	0.000212276	0.000188612	0.000371491	7.55759e-06
Bra021720	ARM repeat superfamily protein	3.02175e-05	5.58094e-05	2.81805e-05	2.19188e-05	1.0497e-06	5.88509e-05	3.13743e-05	3.70768e-05	3.77144e-05
Bra036763	Ribosomal protein L21	0.000306045	0.000423932	0.000356768	0.000277494	0.000265787	0.000357628	0.000211841	0.000438103	0.000190987
Bra007912	beta carbonic anhydrase 4	0.000541807	5.55931e-06	0.000449141	0.000873355	0.00112929	0.000703473	0.000541713	4.92442e-06	0.000551001
Bra009710	tubulin beta 8	0.0025944	0.00265138	0.00187109	0.00230846	0.00269173	2.69482e-06	0.0018437	0.00200903	0.00253289
Bra011292	O-methyltransferase family protein	0.000249841	0.000230719	0.000194166	0.00027184	0.000289302	0.000194634	0.000403519	0.000238432	0.000242532
Bra030922	regulatory particle triple-A 1A	0.000255217	0.000235683	0.000238013	0.00015868	0.000126654	0.000198822	0.000201895	2.98239e-06	0.000242694
Bra008474	tetratricopeptide repeat (TPR)-containing protein	1.21914e-06	6.75495e-05	3.41086e-05	8.84323e-07	3.38805e-05	3.79898e-05	3.37548e-05	0.000109698	7.10081e-05
Bra015815	tubulin beta-1 chain	0.00225854	0.00221402	0.00168503	0.00194072	0.0022451	0.00238205	0.00185195	0.00164852	0.00216837
Bra014713	Heat shock protein 70 (Hsp 70) family protein	0.000515182	0.000634335	0.000373686	0.000512103	0.000490498	0.000624311	0.000501885	0.00065554	1.58765e-06
Bra028543	Aldolase superfamily protein	0.00277663	0.0022436	4.04603e-06	0.00210849	0.0023511	0.00202789	0.00213216	0.00202286	0.00270743
Bra007513	DYNAMIN-like 1E	2.48509e-06	6.88465e-05	2.31757e-06	7.21042e-05	1.72655e-06	5.80788e-05	3.44029e-05	6.0984e-05	4.13551e-05
Bra039679	Heat shock protein 70 (Hsp 70) family protein	0.000588613	0.000666301	0.000460397	0.000537145	0.000606826	0.000665634	0.000591432	0.000667867	0.000710949
Bra029249	H(+)-ATPase 11	0.000211857	0.000220097	0.000172879	0.000115256	0.000101194	0.000185674	9.16531e-07	0.000194962	0.000176279
Bra009298	Eukaryotic aspartyl protease family protein	0.000283039	0.000294048	3.2995e-06	0.000230971	0.000270388	0.000303183	0.000244895	0.000202585	0.0003827
Bra010681	S-adenosylmethionine carrier 1	0.000121659	0.000224695	3.78193e-06	0.000147079	0.000197224	0.000189552	0.000168422	0.000132689	0.000101228
Bra012861	20S proteasome alpha subunit PAD1	0.000559144	0.000631093	0.000521452	0.000585846	0.000561129	0.000532389	0.000602051	0.0005082	0.000413551
Bra029733	ARM repeat superfamily protein	0.000178117	0.000115139	6.6444e-05	7.75203e-05	7.42496e-05	8.32551e-05	7.39742e-05	0.00013113	0.000103743
Bra027235	Cyclophilin-like peptidyl-prolyl cis-trans isomerase family protein	9.95627e-05	0.000153237	0.000185702	9.6293e-05	0.000115288	0.000129271	0.00011486	0.000135737	0.000138071
Bra032808	NAD(P)-binding Rossmann-fold superfamily protein	0.000776589	0.000806795	0.00045265	0.000704142	0.000674434	0.000794046	0.000537546	0.000516141	0.000686559
Bra025225	Glycosyl hydrolase family 38 protein	9.1274e-05	8.4288e-05	2.83737e-05	7.72419e-05	0.000116259	9.4807e-05	6.31787e-05	0.000111993	7.5946e-05
Bra009441	sulfite reductase	0.000336082	0.000376864	0.000380589	0.000417914	0.00031689	1.87013e-06	0.000282481	0.000235641	0.000319591
Bra001207	Oxidoreductase, zinc-binding dehydrogenase family protein	9.44182e-05	4.35958e-06	8.80534e-05	6.8488e-05	9.83977e-05	7.35547e-05	0.00013071	7.7234e-05	7.85621e-05
Bra027452	Sugar isomerase (SIS) family protein	0.000200595	0.000132316	0.000213798	0.000207865	0.000278733	0.000200918	0.000257863	0.000187528	0.000166908
Bra014593	plastoglobulin 34kD	0.0002606	0.000144393	0.000340247	0.000264644	0.000108634	0.000121809	0.000252538	0.000127903	0.000130102
Bra031624	photosystem I subunit O	1.07116e-05	9.89174e-06	0.000699265	0.000932382	0.00104188	8.34465e-06	0.000889731	0.000262862	0.000267382
Bra021961	Pectinacetylesterase family protein	0.000516402	0.000403512	0.000666819	0.000461024	0.000579565	0.00049513	0.00074239	0.00045491	0.000760204
Bra035320	allene oxide synthase	2.93607e-06	5.42269e-05	0.000109526	0.000170378	0.000142791	0.00016011	0.000121939	2.4017e-06	0.00019544
Bra032101	40s ribosomal protein SA	0.00111701	0.00142448	4.96054e-06	0.00123466	0.00129344	0.00120169	0.000883637	0.000739675	0.00123924
Bra040449	carotenoid cleavage dioxygenase 1	0.000113578	5.24425e-05	0.000105922	0.000102982	0.000138093	0.000110601	0.000196543	6.96801e-05	0.000165383
Bra003340	protein phosphatase 2A-4	0.00034959	0.000368952	9.31497e-05	0.000108678	0.00013879	0.000155624	0.000138275	8.17042e-05	0.000249327
Bra022151	binding	8.73063e-07	2.41872e-05	8.14209e-07	1.26659e-05	1.21315e-05	2.72057e-05	6.04323e-07	4.28499e-05	2.17934e-05
Bra031157	synaptotagmin A	0.000114838	0.000106048	0.000107096	0.000166599	1.99463e-06	0.000156559	0.00025834	0.000117421	0.000167217
Bra030951	Lactate/malate dehydrogenase family protein	0.00127534	0.00130391	0.000892025	0.00148675	0.00120251	0.00124191	0.00138721	0.00130403	0.00121276
Bra005341	catalytics;hydrolases	0.000135059	8.31479e-05	0.000209924	3.26559e-06	6.25562e-05	0.000140287	3.11621e-06	7.36522e-05	0.000112378
Bra003204	phosphoribosylformylglycinamidine cyclo-ligase, chloroplast / phosphoribosyl-aminoimidazole synthetase / AIR synthase (PUR5)	0.000121027	0.000111764	3.76228e-06	0.000117052	2.80284e-06	9.42837e-05	0.000167547	0.000165	0.00013427
Bra025180	Plastid-lipid associated protein PAP / fibrillin family protein	0.000511335	0.000590248	0.000596082	0.000509996	0.000754922	0.000597518	0.000663636	0.000575123	0.000744562
Bra022425	GroES-like zinc-binding alcohol dehydrogenase family protein	0.000170211	0.00019648	0.000158737	0.000185199	0.000147821	0.00016575	0.000206182	3.48082e-06	0.000177034
Bra017293	serine carboxypeptidase-like 26	3.47467e-06	9.62619e-05	6.48089e-05	7.56126e-05	9.65633e-05	8.12063e-05	4.81025e-05	2.84228e-06	5.78231e-05
Bra025748	NmrA-like negative transcriptional regulator family protein	0.000201712	9.31365e-05	4.70285e-06	3.65788e-06	0.000175178	7.85698e-05	0.000209433	0.000165	0.000167837
Bra021673	glutathione S-transferase PHI 9	7.22409e-06	0.000466982	0.00060634	0.00120523	5.01905e-06	0.000619057	0.00130011	0.000886395	0.00108196
Bra032550	Coproporphyrinogen III oxidase	0.000442616	0.000483055	3.75254e-06	0.000437809	0.000447293	0.000470197	0.000473486	0.000263316	0.000334805
Bra006052	Thioesterase superfamily protein	0.000346692	6.40313e-06	0.000581978	0.000201184	0.000192696	0.00016205	0.000383961	0.000623906	0.000461553
Bra028091	plant natriuretic peptide A	0.000246536	1.13833e-05	0.000229917	0.000268245	0.000256927	9.60297e-06	0.000255974	0.000504167	0.000307702
Bra008355	general regulatory factor 2	0.00260934	0.00218014	0.0023755	0.00175754	0.00241717	0.00222635	0.00215018	0.00198198	0.00237792
Bra012260	U5 small nuclear ribonucleoprotein helicase, putative	5.68409e-05	7.87357e-05	6.62616e-07	4.63845e-05	3.94911e-05	6.64213e-05	4.91807e-05	9.29917e-05	6.50312e-05
Bra018288	FtsH extracellular protease family	0.000852902	0.000974164	0.00106752	0.000911722	0.0010136	0.0010666	0.00113413	0.00115667	0.000933777
Bra023324	Protein of unknown function, DUF642	4.56817e-06	0.000717151	0.000852046	0.000629586	0.0006665	0.000462637	0.000822129	0.000560515	0.000912245
Bra011554	arginine decarboxylase 2	9.58752e-05	2.21343e-06	2.23531e-06	6.95449e-05	8.32635e-05	1.86724e-06	4.97727e-05	3.9213e-05	5.98309e-05
Bra016134	Rieske (2Fe-2S) domain-containing protein	0.000553718	0.000536904	0.00061967	0.000461897	0.000557821	0.000539204	0.000517424	0.000588823	0.000414657
Bra002011	transportin 1	7.05189e-05	6.51215e-05	1.64413e-06	5.11522e-05	6.12426e-05	9.61387e-05	6.10154e-05	5.76844e-05	4.40073e-05
Bra029308	calnexin 1	0.000194811	0.00021261	0.000115614	0.000154157	0.000221479	1.37967e-06	0.000171622	0.000101408	0.000206304
Bra034833	Ribosomal protein S11 family protein	0.00258863	0.00181678	0.00173817	0.00112663	0.00107909	0.00112931	0.0015768	0.0023716	8.61565e-06
Bra033637	Chaperone DnaJ-domain superfamily protein	7.9345e-05	0.000109908	5.54973e-05	5.75544e-05	1.37815e-06	0.000108171	4.11912e-05	9.73563e-05	6.60203e-05
Bra036573	TRAF-like family protein	0.000710025	0.000983521	0.000372466	0.00099787	0.000894107	0.000587702	0.00125939	0.0006171	0.00114465
Bra040411	zeta-carotene desaturase	0.000138429	0.000102267	0.000129098	2.00825e-06	0.000134646	8.62727e-05	7.66553e-05	6.79412e-05	2.30365e-06
Bra031177	NAD(P)-linked oxidoreductase superfamily protein	0.000351853	0.000417758	0.000187505	0.000401065	0.000453988	0.000234946	0.000487096	0.000370048	0.000418235
Bra018423	Pyruvate phosphate dikinase, PEP/pyruvate binding domain	0.000111339	0.000113099	9.34502e-05	0.00010499	7.73545e-07	0.000156126	6.93607e-05	0.000154828	0.000129698
Bra002427	Adaptor protein complex AP-2, alpha subunit	6.16953e-05	7.12166e-05	1.43841e-06	4.47518e-05	6.42956e-05	4.80625e-05	5.33809e-05	6.30834e-05	7.70018e-05
Bra016889	Rhodanese/Cell cycle control phosphatase superfamily protein	0.00039996	0.000430906	0.000248666	0.000386825	0.000509444	0.000363512	0.00036913	0.000490751	0.000443724
Bra034692	Transducin/WD40 repeat-like superfamily protein	3.50341e-05	4.31369e-05	3.26724e-05	2.54127e-05	1.6227e-05	9.09755e-07	8.08339e-07	3.82105e-05	3.88676e-05
Bra001524	heat shock protein 60-3A	5.43069e-05	0.000100301	2.53231e-06	0.000118178	9.43265e-05	0.000169227	0.000112772	0.000111058	2.25935e-06
Bra033412	photosystem II family protein	0.000355012	0.000573721	0.000579391	0.000772545	0.000739951	0.000345707	0.000307169	0.0004356	0.000516939
Bra018851	10-formyltetrahydrofolate synthetase	0.000637957	0.000634446	0.000274593	0.000444956	0.000596656	0.000630792	0.000645394	0.000782772	0.000571654
Bra000445	RNA helicase family protein	6.44473e-05	9.9191e-05	6.01028e-05	1.55827e-06	5.9701e-05	5.02064e-05	1.48699e-06	5.27178e-05	5.36244e-05
Bra027031	3-ketoacyl-acyl carrier protein synthase III	0.00015378	0.000177513	0.00010756	0.000139434	0.000133551	0.000209649	0.000186278	0.000188688	0.000159944
Bra014258	electron transfer flavoprotein alpha	8.77502e-05	8.1034e-05	8.18349e-05	3.18256e-06	6.09658e-05	6.83601e-05	6.07396e-05	3.58898e-06	7.3014e-05
Bra005745	Ribosomal protein S12/S23 family protein	0.00102784	0.000843707	0.000532529	0.000828403	0.000476071	0.000889687	0.000869559	0.000373676	0.000475128
Bra010626	elicitor-activated gene 3-1	0.000134669	4.14538e-06	0.000125591	0.000260492	0.000187126	3.49704e-06	0.000279648	0.000146879	0.000298809
Bra020980	Proteasome component (PCI) domain protein	4.02378e-06	0.000148632	7.50507e-05	0.000116749	8.38675e-05	9.40395e-05	8.35563e-05	6.5829e-05	0.000167402
Bra010483	31-kDa RNA binding protein	0.000842402	0.000875167	0.000540111	0.000916578	0.000877908	0.000820322	0.00087465	0.000732152	0.000788551
Bra020572	Tubulin/FtsZ family protein	0.00172575	0.00183885	0.00120707	0.0017092	0.00172932	0.00175808	0.00160804	0.00122163	0.00162924
Bra017632	vacuolar ATP synthase subunit H family protein	0.000164532	0.000151939	0.000122752	0.000190954	0.000182897	2.5635e-06	0.000136664	0.000161504	0.000219042
Bra036276	alpha/beta-Hydrolases superfamily protein	9.83025e-05	4.53893e-06	9.16759e-05	7.13055e-05	0.000102446	3.82903e-06	0.000102066	0.000120617	0.000122691
Bra006664	voltage dependent anion channel 1	0.000337648	0.00020787	0.000157443	0.000244919	0.000273683	0.000350717	0.000194763	0.000276196	0.000234121
Bra015135	ADP glucose pyrophosphorylase 1	0.000627245	0.000744734	0.000947082	0.000844971	0.000830073	0.000907481	0.000764969	0.000708548	0.000844996
Bra009196	ubiquitin activating enzyme 2	4.70185e-05	8.68397e-05	1.46163e-06	1.13686e-06	7.62226e-05	6.10481e-05	7.59398e-05	7.69223e-05	0.000130408
Bra041107	photosystem II reaction center protein E	0.00392973	0.00552984	0.00506095	0.00271477	0.00481042	0.00335294	0.00284964	0.00397988	0.00638388
Bra015170	20S proteasome subunit PAA2	0.000694511	0.000524745	0.00047105	0.000503777	0.000526388	0.000491859	0.000568138	0.000516463	0.000262672
Bra016679	DYNAMIN-like 1C	7.58882e-05	7.00799e-05	2.35909e-06	0.000110094	3.51497e-05	0.000137945	3.50193e-05	4.13844e-05	0.00010524
Bra030844	Nucleoside diphosphate kinase family protein	0.00230878	0.00222898	0.00117444	0.00159859	0.00131241	0.00138984	0.00152547	0.0015452	0.0020957
Bra000230	S-formylglutathione hydrolase	0.000164068	0.000252518	0.000357019	0.00027769	0.000379963	4.26047e-06	0.000264987	0.000313151	0.000318536
Bra038526	Peroxidase superfamily protein	0.000148393	9.13568e-05	4.61299e-06	0.000143519	0.000137464	7.70684e-05	0.000102716	8.09236e-05	8.23151e-05
Bra010674	Coatomer, alpha subunit	0.000203362	0.000211272	0.000118533	0.000175171	0.000185442	0.00024754	0.000193552	0.000239128	0.000211513
Bra028526	beta-1,3-glucanase_putative	7.22409e-05	6.67117e-05	6.73711e-05	0.000104803	2.50952e-06	5.62779e-05	7.50064e-05	5.9093e-05	6.01092e-05
Bra038817	signal recognition particle binding	4.8086e-06	0.000266434	4.48445e-06	0.00013952	0.000133634	7.4921e-05	3.32846e-06	0.000157337	0.000120032
Bra011407	sulfoquinovosyldiacylglycerol 1	0.000162807	0.000150346	0.000242931	0.000165333	0.00018098	0.000228297	0.000180309	0.000159811	0.000135466
Bra022815	glutathione S-transferase PHI 9	0.000650168	0.00040027	6.73711e-06	0.000995624	0.00175667	0.000619057	0.00110009	5.9093e-06	0.00102186
Bra011056	Glutaredoxin family protein	8.97791e-06	0.000248723	0.000251181	0.000325615	0.000311877	0.000139881	0.000186432	0.000146879	0.000298809
Bra021292	B-S glucosidase 44	9.06525e-05	0.000111619	2.81805e-06	0.000175351	0.000146958	0.000141242	0.000188246	2.47179e-06	0.000100572
Bra012963	D-ribulose-5-phosphate-3-epimerase	0.00137693	0.00132241	0.00205458	0.0014782	0.00168369	0.00137302	0.00125809	0.00139665	0.00137484
Bra028701	TUDOR-SN protein 1	0.000188645	0.000174207	7.33036e-05	0.00018245	0.000207518	0.000159207	0.000184985	0.000270045	0.000130804
Bra013164	xyloglucan endotransglucosylase/hydrolase 4	0.000947702	0.000826547	0.000834716	0.000916578	0.00069501	0.000615241	0.000801763	0.000689085	0.00113902
Bra011918	protein containing PDZ domain, a K-box domain, and a TPR region	0.000524079	0.000483967	0.000622046	0.000622064	0.000761325	0.000556737	0.00056063	0.000428696	0.000713566
Bra021101	Legume lectin family protein	0.000281373	0.000311805	0.000314887	0.000244919	0.000234586	0.000306878	0.000272668	0.00018413	0.000327769
Bra014334	Ribosomal protein L30/L7 family protein	0.00121944	0.0011261	0.000837963	0.00116387	0.00124854	0.000849982	0.00151046	5.25e-06	0.00133507
Bra015734	Phosphofructokinase family protein	0.000201385	2.32464e-06	2.34762e-06	7.30391e-05	1.74894e-06	5.88318e-05	5.22735e-05	8.23663e-05	6.2837e-05
Bra033757	Encodes a chloroplast protein that induces tolerance to multiple environmental stresses and reduces photooxidative damage.	0.000116343	0.000107438	0.00016275	8.43916e-05	8.08311e-05	9.06348e-05	0.000120797	0.000142753	4.84025e-06
Bra025548	prohibitin 3	0.000280357	0.000362459	0.000366042	0.00032538	0.000350608	0.00030577	0.000426931	0.000412798	4.66551e-06
Bra001306	Ribosomal L29 family protein	0.00138902	0.00186576	0.00117762	0.00146553	0.00070185	0.00127883	0.000874058	0.00123951	0.00147096
Bra017669	Ribosomal protein S3Ae	0.000654596	0.000879265	0.000388481	0.000647487	0.00053748	0.000741747	0.000782633	0.000730172	0.000792243
Bra040108	CLP protease R subunit 4	5.09239e-06	0.000188105	0.000237455	0.000184693	0.000176901	0.000158685	0.000176244	0.000166623	0.000169488
Bra010410	Translation initiation factor SUI1 family protein	0.000274899	0.000507717	1.28184e-05	0.000199403	0.000286485	1.07077e-05	0.000285422	0.000449734	0.000343101
Bra001896	Pyruvate kinase family protein	2.74899e-06	0.000253859	0.000128184	9.97016e-05	9.54951e-05	0.000192739	0.000114169	0.000224867	0.000182987
Bra016329	spermidine synthase 1	0.000513062	0.000258433	0.000217489	0.000473657	0.000291647	0.000436027	0.000419705	0.000381531	0.000388092
Bra004590	disproportionating enzyme 2	0.000165056	0.000167665	1.5393e-06	0.000143672	0.000103208	0.000180017	9.13999e-05	0.000162019	0.00010987
Bra000537	regulatory particle non-ATPase 13	0.000153274	9.4362e-05	9.52946e-05	7.41202e-05	0.00010649	3.98018e-06	7.07297e-05	4.17928e-06	0.000127534
Bra029847	haemoglobin 2	0.000675295	8.90871e-06	0.000449838	0.000629792	0.000536196	0.000300615	0.000600983	0.000394565	0.00032108
Bra004954	unknown protein;	0.000115478	5.33198e-06	0.00016154	0.000125646	0.000120345	8.99609e-05	0.000119899	9.44609e-05	0.000144128
Bra025448	dynamin-like protein	2.66411e-06	0.000246021	0.000149072	0.000154597	0.000203603	2.07543e-06	0.000221288	0.000261509	0.000221672
Bra013836	MA3 domain-containing protein	0.000109379	0.00014141	2.04011e-06	9.5208e-05	7.59926e-05	5.11257e-05	0.000121137	0.000143155	9.10104e-05
Bra008506	ILITYHIA	2.37762e-05	3.84237e-05	1.10867e-05	1.72465e-05	8.25943e-06	2.77836e-05	2.0572e-05	3.40356e-05	2.47292e-05
Bra033613	cinnamyl alcohol dehydrogenase 9	0.000388295	0.000637467	0.000482826	0.00071979	0.000719397	0.000436935	0.000597273	0.000529375	0.000502579
Bra033802	plastid transcriptionally active 16	0.00133738	0.00120695	0.00195587	0.00125671	0.00116145	0.00137336	0.00130442	0.00111884	0.00146685
Bra018190	RAB GTPase homolog A2C	0.000357875	6.60968e-06	0.000333751	0.000155755	0.000298367	5.57592e-06	0.000346804	0.000409839	0.000238221
Bra009604	NAD(P)-binding Rossmann-fold superfamily protein	0.000982247	0.0013606	0.000687025	0.000979676	0.00140752	0.00124345	0.00118982	0.00105457	0.00112378
Bra037476	FK506- and rapamycin-binding protein 15 kD-2	0.000476435	0.000527964	0.000177727	0.00041471	0.000463415	0.000445389	0.000461696	0.000545613	7.92851e-06
Bra035593	HEAT SHOCK PROTEIN 81.4	0.00131743	0.00149406	0.00086219	0.00145858	0.00147733	0.0012964	0.00121588	0.00143687	0.00130773
Bra030083	arabinogalactan protein 31	0.00048689	0.000494587	9.08137e-05	0.000494445	0.000541239	0.000417233	0.000370721	0.000318621	0.000567174
Bra016045	NAD(P)-binding Rossmann-fold superfamily protein	0.000169438	0.000156469	5.26719e-06	0.000122905	0.000117719	0.000219995	0.000117283	0.0001386	9.39889e-05
Bra026451	Transketolase family protein	0.000720315	0.000457314	0.000797713	0.000489838	0.000563006	0.000736506	0.000685565	0.000662869	0.000824105
Bra033859	membrane protein, putative	0.000211935	0.000279591	0.000254119	0.000263539	0.000105175	0.000306621	0.000188612	0.000173363	0.000176344
Bra008903	beta-6 tubulin	0.00208015	0.00195296	0.00139028	0.00171006	0.00216782	0.00205264	0.00155984	0.00150305	0.00201929
Bra016555	Ribosomal protein L6 family protein	0.000796502	0.00128719	0.00080471	0.000722197	0.000968419	0.00103417	0.00147021	0.00114019	5.52285e-06
Bra025584	Glutaredoxin family protein	0.000839556	0.000775298	0.000521974	0.000913482	0.000583295	0.00032702	0.000484275	0.000343378	0.000698566
Bra018359	20S proteasome beta subunit D1	0.000380681	0.000210927	0.000142008	0.000276134	0.000317381	5.93125e-06	0.000316203	0.000249118	0.000190051
Bra023411	Ubiquinol-cytochrome C reductase iron-sulfur subunit	0.000226741	5.23468e-06	0.000264321	0.000123353	0.000315064	4.41596e-06	0.000274658	0.000278212	0.00023583
Bra001457	heat shock protein 70	0.00110941	0.00126843	2.4634e-06	0.00128374	0.00146816	2.05778e-06	0.0017004	0.00166375	0.00171434
Bra040162	RAB GTPase homolog 1C	5.66854e-06	0.000418774	0.000528642	0.000657885	0.000669511	4.41596e-06	0.000667027	0.00064916	0.000754655
Bra027140	NAD(P)-linked oxidoreductase superfamily protein	0.000232512	0.000171773	4.33676e-06	0.000134925	0.000226158	0.000144907	0.00019313	0.000114117	0.000154772
Bra021232	heat stable protein 1	0.000290314	0.000402141	1.35372e-05	0.000421169	0.00030255	0.000226163	0.000200952	1.18738e-05	0.00024156
Bra040482	photosystem I P subunit	9.30047e-06	0.000772977	0.00104082	0.000607165	0.000646165	0.000724536	0.000515014	0.000760778	0.000773861
Bra010748	Sec23/Sec24 protein transport family protein	0.000168366	7.77399e-05	0.000117762	9.15957e-05	5.84875e-05	1.63953e-06	1.45676e-06	0.000120508	0.000140092
Bra003273	beta-1,3-glucanase 3	0.000229082	0.000169239	0.000170912	0.000232637	0.000700298	0.000107077	0.00034885	0.000224867	0.000419346
Bra022554	Ribosomal protein S10p/S20e family protein	0.000751538	1.15669e-05	0.000467251	0.000817714	0.000870238	0.000780629	0.000780308	1.0246e-05	0.000833772
Bra028234	UDP-glucose 6-dehydrogenase family protein	0.0006148	0.000627507	3.01766e-06	0.000539842	0.000472104	2.52078e-06	0.000716727	0.000608781	0.000753869
Bra021171	delta tonoplast integral protein	0.00118337	0.000478101	0.000965652	0.00177041	5.13855e-06	0.00080665	0.00184301	0.000847	0.000492323
Bra033230	NAD(P)-binding Rossmann-fold superfamily protein	0.0001053	0.000145861	0.000147303	0.000114572	0.000182897	0.000123048	0.000109331	0.000258407	4.38084e-06
Bra000135	ribosomal protein L23AA	0.000931907	0.000764961	0.000675957	0.000675977	0.00115103	0.00080665	0.0007884	0.0007623	0.000603095
Bra024205	Protein phosphatase 2C family protein	0.000216471	4.99757e-06	0.000201879	0.000117766	3.75991e-06	0.000126478	0.000112379	0.000177073	0.000270177
Bra010667	FUNCTIONS IN: molecular_function unknown; INVOLVED IN: biological_process unknown; LOCATED IN: mitochondrion; EXPRESSED IN: 26 plant structures; EXPRESSED DURING: 14 growth stages; CONTAINS InterPro DOMAIN/s: Mitochondrial inner membrane protein Mitofilin (InterPro:IPR019133); Has 30201 Blast hits to 17322 proteins in 780 species: Archae - 12; Bacteria - 1396; Metazoa - 17338; Fungi - 3422; Plant…	9.45619e-05	6.54932e-05	2.20469e-06	5.14442e-05	1.64246e-06	5.525e-05	4.90909e-05	9.66895e-05	7.86817e-05
Bra006997	plasma membrane intrinsic protein 2A	0.000432942	0.000399805	0.000403757	0.000785106	3.75991e-06	0.000590231	0.000524435	0.000486951	0.000540354
Bra004649	Insulinase (Peptidase family M16) family protein	6.40486e-05	4.43598e-05	1.49328e-06	2.32294e-05	3.33741e-05	2.49479e-05	3.32502e-05	9.16856e-05	3.99695e-05
Bra029732	light harvesting complex photosystem II	0.00447617	0.00453199	0.00643768	0.00512459	0.00303495	0.00504156	0.00645801	0.0045438	0.00480143
Bra025958	glyoxylate reductase 2	0.00108677	0.000794511	0.000760135	0.000821157	0.000817973	0.000881905	0.000971657	0.000518571	0.000753555
Bra013183	photosystem II light harvesting complex gene 2.1	5.86105e-06	0.00687382	0.0132823	0.00527177	0.00289116	0.00725985	0.00685624	0.00771889	0.00502308
Bra003675	Pyridoxal phosphate (PLP)-dependent transferases superfamily protein	0.000154162	3.55906e-06	0.00014377	0.00013978	0.000187436	0.000210169	0.000133386	3.1526e-06	0.000192409
Bra007555	Transketolase	0.00357778	0.00378982	0.00345437	0.00337378	0.0035385	0.00409883	0.00326315	0.00385626	0.00306451
Bra027850	ubiquitin-protein ligase 1	1.64184e-05	4.54853e-05	3.8279e-07	1.48867e-05	5.70346e-06	1.27904e-05	1.70469e-05	3.69331e-05	2.39071e-05
Bra033163	nucleoside diphosphate kinase 3	0.000528742	0.000305171	0.000184912	0.000335591	0.000551027	0.000257441	0.000411737	0.000378447	0.000549935
Bra006538	FAD/NAD(P)-binding oxidoreductase	0.000142059	0.000218644	4.41609e-06	0.000103045	0.000197395	0.000110668	9.83315e-05	0.000154939	0.000197004
Bra018196	translocon at the outer envelope membrane of chloroplasts 75-III	0.00021985	0.000179138	0.000156788	0.000178234	0.00010782	0.000181345	0.000143226	0.000222152	0.00018293
Bra000384	RNA 3'-terminal phosphate cyclase/enolpyruvate transferase, alpha/beta	0.000181305	0.000195333	2.81805e-06	0.000131513	0.00010497	0.000164782	2.09162e-06	9.88716e-05	7.54288e-05
Bra003633	vacuolar ATP synthase subunit A	2.49306e-06	0.00181878	0.00174375	1.80839e-06	0.00197459	0.00186449	0.00239868	0.00232483	0.00215737
Bra036518	30S ribosomal protein, putative	0.00046134	0.000189347	0.000239023	0.00014873	0.000213682	0.000279532	0.000212889	0.000251584	0.000213259
Bra027810	oxidoreductases, acting on the aldehyde or oxo group of donors, NAD or NADP as acceptor;copper ion binding	0.000513774	0.000802917	0.000589711	0.000630682	0.000604073	0.00049261	0.000656544	0.000452595	0.000493262
Bra038805	RAB GTPase homolog E1B	0.00398922	0.00455957	0.00387277	0.0037238	0.00381659	0.00443233	0.00461723	0.00427958	0.00399947
Bra001406	Ribosomal protein S11 family protein	0.00258863	0.0019124	0.00154504	0.00150217	0.00129491	8.0665e-06	0.00172015	0.0024563	8.61565e-06
Bra040213	glyceraldehyde-3-phosphate dehydrogenase C2	0.00468711	0.00504976	0.0048854	0.00496649	0.00504429	0.00504753	0.00518461	0.00466101	0.00477939
Bra035741	Leucine-rich repeat (LRR) family protein	0.00136169	0.00106099	0.00111116	0.00108033	0.00100518	0.000994499	0.00114873	0.000765781	0.00123924
Bra032672	photosystem I subunit l	0.0029787	0.00314367	0.00350545	0.0031381	0.00339989	0.0025415	0.00333818	0.0038289	0.00295056
Bra001235	Sec23/Sec24 protein transport family protein	3.30815e-05	4.58243e-05	4.62773e-05	3.59945e-05	4.59678e-05	3.86573e-05	1.14493e-06	5.41214e-05	5.50521e-05
Bra018643	UDP-D-apiose/UDP-D-xylose synthase 2	0.000239565	0.000258101	0.000335124	0.000318584	0.000332883	3.11047e-06	2.76373e-06	0.000195964	0.000199334
Bra000708	light harvesting complex of photosystem II 5	0.00465954	0.00491761	0.00569045	0.00535148	0.00385391	0.00414848	0.00464593	0.00576262	0.0039232
Bra030797	U2 small nuclear ribonucleoprotein A	0.000242684	0.000168082	0.000169744	0.000132027	0.000210761	0.000236323	0.000125987	0.000148887	0.000201929
Bra019231	chloroplast heat shock protein 70-1	0.00146568	0.0014141	0.00142808	0.00131704	0.00121588	0.00149969	0.00105995	0.00139576	0.00147437
Bra015696	Mog1/PsbP/DUF1795-like photosystem II reaction center PsbP family protein	0.000236225	5.45362e-06	0.000385527	0.000257025	0.000123091	0.00013802	0.000286146	0.00024154	0.000245693
Bra027462	sterol carrier protein 2	0.000505099	0.00023322	1.17762e-05	0.000366383	0.000175463	0.000196744	0.000262217	0.000516463	0.000210138
Bra007382	phenylalanyl-tRNA synthetase class IIc family protein	3.61204e-06	0.000133423	0.000269484	0.000157204	0.000225857	0.00025325	0.000200017	0.000177279	3.00546e-06
Bra006124	Pyridoxal-dependent decarboxylase family protein	0.000189028	0.00017456	2.93809e-06	0.000114262	0.000175107	0.000171802	6.54214e-05	7.73124e-05	7.86418e-05
Bra004810	methylenetetrahydrofolate reductase 2	0.000195544	0.000128984	2.60518e-06	0.000182368	1.94082e-06	0.000130573	0.000135353	0.000228507	0.000162706
Bra024291	Inositol monophosphatase family protein	3.82556e-06	0.000105983	0.000142707	0.000138747	5.31574e-05	0.000119209	7.94402e-05	3.12931e-06	6.36624e-05
Bra015319	Ribosomal protein L14p/L23e family protein	0.00155318	0.00174165	0.000724239	0.00136805	0.00107909	0.0012964	0.000998299	0.0012705	0.000738484
Bra007070	Eukaryotic aspartyl protease family protein	0.000397325	0.000433626	0.000235799	0.00039301	0.000401524	0.000393945	0.000375032	0.000206826	0.00039071
Bra019659	NAD(P)-linked oxidoreductase superfamily protein	0.000237731	0.000219536	0.000295608	0.000229924	0.000220223	0.0001852	5.48516e-06	0.000324107	0.00032968
Bra034316	20S proteasome alpha subunit G1	0.000499013	0.000288012	0.000174515	0.000180984	0.000216686	0.000242967	0.000215882	0.000408193	0.000207606
Bra008271	12-oxophytodienoate reductase 1	0.000124587	0.000191752	0.000232376	3.01237e-06	0.000173117	0.000258818	0.000172475	6.79412e-05	0.000103664
Bra023250	NAD(P)-binding Rossmann-fold superfamily protein	0.000320243	4.92887e-06	0.000248879	0.000116147	0.000259576	0.00012474	0.000258613	0.000218299	0.000222053
Bra002999	light-harvesting chlorophyll B-binding protein 3	0.00310636	0.0028686	0.00923747	0.00284845	0.00171026	0.00474858	0.00454378	0.00306838	0.00214578
Bra009521	starch branching enzyme 2.2	0.000109507	1.68543e-06	6.80836e-05	5.29555e-05	8.87622e-05	0.000113746	5.05331e-05	8.9577e-05	1.51862e-06
Bra035486	Single hybrid motif superfamily protein	0.00093565	0.000777633	0.00139612	0.00081443	6.50057e-06	0.00065601	0.001101	0.00153072	7.78522e-06
Bra038964	selenium-binding protein 1	9.78894e-05	3.01324e-06	0.000213012	0.000118343	9.06802e-05	0.000152518	6.77578e-05	8.00735e-05	0.000135751
Bra016752	vacuolar ATP synthase subunit C (VATC) / V-ATPase C subunit / vacuolar proton pump C subunit (DET3)	4.13079e-06	0.00041961	0.00046228	0.000629234	0.000516588	0.000547063	0.000629043	0.000642008	3.43709e-06
Bra033573	regulatory particle non-ATPase 10	0.000122298	0.000112937	3.80178e-06	0.000118281	8.49681e-05	6.35157e-05	8.46528e-05	6.66929e-05	0.000135679
Bra021241	S-adenosylmethionine synthetase family protein	0.000750901	0.000693428	3.6857e-06	0.000458678	0.00090611	0.00083128	0.000574476	3.23282e-06	0.000624799
Bra030756	ATP-dependent caseinolytic (Clp) protease/crotonase family protein	0.000432774	0.000266434	0.000269067	0.000279041	0.000334085	0.000262224	0.000299561	0.000432678	0.000320086
Bra015538	translocon at the inner envelope membrane of chloroplasts 110	0.000418104	0.000529104	0.000346595	0.00034821	0.000376554	0.000615241	0.000343	0.000405344	0.00034789
Bra016293	S-adenosyl-L-methionine-dependent methyltransferases superfamily protein	0.000127101	2.34747e-06	2.37067e-06	5.53172e-05	3.53223e-05	3.96064e-05	1.75956e-06	0.000124763	8.46054e-05
Bra001535	Tetratricopeptide repeat (TPR)-like superfamily protein	0.000698662	0.000347409	0.000651565	0.000350853	0.000410728	0.000502411	0.000409204	0.000351695	0.000670768
Bra011551	Ribosomal protein S3Ae	0.000414971	0.000602188	0.000331713	0.000387009	0.000329495	4.61822e-06	0.00041034	4.84924e-06	0.000591915
Bra010782	Ribosomal protein S5/Elongation factor G/III/V family protein	0.00175032	0.00185455	1.71824e-06	0.00175075	0.00224011	1.43532e-06	0.00193848	0.00214011	0.00199294
Bra022002	GDSL-like Lipase/Acylhydrolase superfamily protein	0.000135059	0.000291018	0.000125955	9.79676e-05	0.000250225	0.000175359	0.000311621	0.000147304	0.000262215
Bra001052	Ribosomal protein S7e family protein	0.000813183	0.000750943	0.000606693	0.000766815	0.000621468	0.000823543	0.000731737	0.000731701	0.000473635
Bra031233	binding	4.33647e-05	5.33942e-05	6.74024e-07	1.57277e-05	2.00855e-05	2.8152e-05	1.00055e-05	5.91205e-07	1.80411e-05
Bra040592	general regulatory factor 7	0.00243986	0.00258284	0.00221989	0.00194246	0.00248068	0.00241068	0.00230671	0.00238523	0.00267382
Bra011794	mitochondrial heat shock protein 70-1	0.000387156	0.000336493	0.000148671	0.000231273	0.000174048	0.000266123	0.000236457	0.000502984	0.000246342
Bra020193	Ribosomal protein L1p/L10e family	0.000473049	0.00050965	7.35268e-06	0.000457514	0.000273882	0.00042994	0.000272866	0.000322462	6.56014e-06
Bra016680	semialdehyde dehydrogenase family protein	0.000180602	0.000250169	0.000168428	0.000163754	3.1369e-06	0.000140695	0.000250021	3.69331e-06	0.000300546
Bra014689	HIS triad family protein 3	1.20401e-05	0.000333559	0.00022457	0.000349342	0.000334603	0.000187593	0.000250021	9.84884e-06	0.000300546
Bra003049	vacuolar protein sorting 26A	0.00010286	9.49869e-05	9.59257e-05	7.46111e-05	0.000107195	8.01307e-05	7.11981e-05	4.20695e-06	0.000213965
Bra000802	ATPase, F1 complex, gamma subunit protein	0.00191033	0.00207092	0.00216884	0.00174718	0.00184658	0.0021029	0.00192597	0.00180044	0.00228061
Bra026938	N-terminal nucleophile aminohydrolases (Ntn hydrolases) superfamily protein	0.000203473	0.0001879	0.000189757	0.000147593	0.00023561	0.000264187	0.000281683	0.000277402	0.000169303
Bra036261	translocon at the outer envelope membrane of chloroplasts 159	0.000199894	0.000286122	6.52468e-05	0.000152247	7.63838e-05	0.000186869	4.15093e-05	0.000138986	0.00013306
Bra029815	FKBP-like peptidyl-prolyl cis-trans isomerase family protein	0.000201712	6.2091e-06	0.000188114	0.000146315	9.34281e-05	0.00010476	0.000139622	0.000165	0.000167837
Bra024531	Tetratricopeptide repeat (TPR)-like superfamily protein	0.000160122	9.85774e-05	9.95518e-05	3.87157e-06	0.000148329	0.00012474	7.38894e-05	0.000130979	4.44106e-06
Bra027286	Class I glutamine amidotransferase-like superfamily protein	0.000237731	0.000146357	0.00036951	0.000201184	0.000247751	0.000339534	0.000356535	0.000226875	0.000362648
Bra014744	triosephosphate isomerase	0.00299629	5.64686e-06	0.00279431	0.00323795	0.0031863	0.00338221	0.00380938	5.00197e-06	0.00371423
Bra018184	tubulin beta chain 3	0.00325164	0.00316249	0.00232273	0.00250919	0.0030282	0.00309904	0.00215497	0.00246177	0.00313732
Bra003525	transducin family protein / WD-40 repeat family protein	0.000126389	9.07786e-05	6.54828e-05	0.000101865	6.82971e-05	0.000142221	9.72053e-07	0.000137848	0.000175273
Bra021473	reversibly glycosylated polypeptide 1	0.000435064	0.000482118	4.05736e-06	0.000473373	0.000634762	0.000372821	0.000542063	3.55882e-06	0.000506803
Bra006027	mitochondrial HSO70 2	0.000205266	0.000231679	0.000212699	1.65437e-06	0.000205995	0.000142141	0.000299952	1.86564e-06	0.000322612
Bra004654	Ribosomal protein S5 family protein	0.00103545	0.00181175	0.000965652	0.00138358	0.00162811	0.00135857	0.00165979	0.00115905	0.00145106
Bra003170	plant uncoupling mitochondrial protein 1	0.000153274	4.7181e-06	0.000190589	3.70601e-06	0.00010649	7.96036e-05	0.000106095	8.35855e-05	0.000170046
Bra024879	MLP-like protein 328	0.00123431	0.000474934	0.000575554	0.000969944	0.00114341	0.000560915	0.00128157	0.00100967	0.000684687
Bra023235	phosphoribulokinase	0.00242562	0.00310705	0.0032837	0.00306488	0.00296275	0.00323066	0.00268096	0.00313625	0.00270188
Bra015781	SKU5 similar 5	0.000344513	0.000397681	0.000240967	0.000270724	0.000339087	0.000223655	0.000357701	0.000234843	0.000238881
Bra001952	aldehyde dehydrogenase 2C4	6.20031e-05	5.72576e-05	8.67352e-05	8.99503e-05	8.61553e-05	2.41512e-06	6.43767e-05	5.07186e-05	2.57954e-06
Bra001286	Clathrin, heavy chain	0.000293053	0.000405934	9.76064e-07	0.000311265	0.000319947	0.000366906	0.000311516	0.000410943	8.70854e-07
Bra005258	Ribosomal protein L24e family protein	0.00105463	0.000973909	0.000894123	0.000834539	0.000599497	0.00119504	0.000929091	0.000862685	0.000717971
Bra009384	EXORDIUM like 2	0.000104591	4.8293e-06	0.000292622	0.000151734	3.63332e-06	0.00012222	0.000144793	0.000171111	0.00013054
Bra012580	Ribosomal L5P family protein	0.00145077	0.00126092	7.95867e-06	0.00111425	0.00106724	0.00119668	0.00100421	6.98077e-06	0.00113613
Bra009396	pyrophosphorylase 6	0.000573321	0.000481309	0.000340247	0.000378063	0.00028969	0.000487238	0.000432923	0.000511611	0.000346939
Bra039662	Lactate/malate dehydrogenase family protein	0.000730908	0.000801522	4.26023e-06	0.00076213	0.000761714	0.000747337	0.00101185	3.73676e-06	0.000722194
Bra003302	Calcium-dependent lipid-binding (CaLB domain) plant phosphoribosyltransferase family protein	0.000120401	5.55931e-05	3.74284e-05	4.36677e-05	1.39418e-06	6.2531e-05	8.33404e-05	9.84884e-05	1.6697e-06
Bra005175	NAD(P)-binding Rossmann-fold superfamily protein	0.00062706	0.000712696	0.000674757	0.000909699	0.000603221	0.000751537	0.000600983	0.000631304	0.0008027
Bra019448	aldehyde oxidase 2	4.78269e-05	7.72911e-05	2.23014e-05	3.46922e-05	4.98427e-05	5.5888e-05	5.79341e-05	6.84642e-05	4.97439e-05
Bra016735	allene oxide cyclase 4	0.00018713	0.000115205	0.000232687	0.000135738	0.000216686	0.00014578	0.000259058	0.000204096	0.000155704
Bra029776	FAD/NAD(P)-binding oxidoreductase family protein	9.85103e-05	3.03235e-06	0.000183739	7.14563e-05	0.000114069	0.000102323	9.09168e-05	8.05814e-05	8.1967e-05
Bra037958	epithiospecifier protein	0.000236225	0.000272681	0.000275376	0.000299863	4.10302e-06	0.000230033	0.000327024	4.8308e-06	0.000294832
Bra005441	SecY protein transport family protein	0.000196191	3.01958e-06	0.000152471	0.000118592	6.81534e-05	0.000178312	0.000158434	2.67474e-06	5.44146e-05
Bra015697	Phosphoenolpyruvate carboxylase family protein	9.13635e-05	4.21853e-06	0.000213012	9.94083e-05	6.34762e-05	3.55875e-06	9.4861e-05	7.47353e-05	0.000114031
Bra036111	NOP56-like pre RNA processing ribonucleoprotein	0.000202841	0.000240834	2.70239e-06	8.40767e-05	6.03971e-05	0.000158019	0.000100288	4.74067e-05	2.4111e-06
Bra022487	Uncharacterized conserved protein (DUF2358)	0.000161789	4.98021e-06	0.000251472	0.000117357	0.000224811	0.000126039	0.000111989	0.000132344	8.97463e-05
Bra018804	Disease resistance protein (CC-NBS-LRR class) family	6.22517e-05	0.000114974	0.000116111	9.03108e-05	2.16251e-06	9.69919e-05	0.000129269	2.54609e-06	0.000103595
Bra037063	acylaminoacyl-peptidase-related	8.07895e-05	1.86515e-06	7.53435e-05	5.86022e-05	4.20973e-05	3.14688e-05	4.19411e-05	6.60858e-05	6.72222e-05
Bra031427	photosystem I light harvesting complex gene 3	0.00312911	0.00246931	0.00376711	0.0032602	0.00288549	0.00252632	0.00315045	0.00269923	0.00236694
Bra029650	Protein of unknown function, DUF538	0.000194147	8.96439e-06	0.00027159	0.000211243	0.00020233	7.56234e-06	0.00020158	0.000158812	0.000242315
Bra012259	Nascent polypeptide-associated complex (NAC), alpha subunit family protein	8.08947e-06	0.000373516	0.000377208	5.86785e-06	0.000281014	0.000252078	0.000223977	0.000463203	0.000201929
Bra031475	SNF1-related protein kinase 2.10	8.82488e-05	0.000122242	4.115e-06	0.000128026	9.19683e-05	0.000103123	0.000122169	3.60937e-06	0.000146858
Bra001787	TRAF-like family protein	6.68034e-05	6.16904e-05	6.23002e-05	4.84571e-05	4.64127e-05	5.20419e-05	9.2481e-05	1.36613e-06	9.72734e-05
Bra024000	NAD(P)-binding Rossmann-fold superfamily protein	9.4132e-05	8.69274e-05	0.000219466	0.000102421	0.000130799	0.000109998	9.77356e-05	7.7e-05	0.000117486
Bra040591	TCP-1/cpn60 chaperonin family protein	0.000232251	0.000348522	0.000243669	0.000189526	0.00026221	0.000361861	0.000301427	0.000237477	0.000144936
Bra003163	Adenine nucleotide alpha hydrolases-like superfamily protein	0.000195368	0.000180415	0.000364397	0.000212571	0.000475073	7.6099e-06	0.000135232	0.000239717	0.000162559
Bra033332	nuclear encoded CLP protease 5	0.000369804	0.000536643	0.000344876	0.000536489	0.000367039	0.000535023	0.000365677	0.000475357	0.000439574
Bra013159	NAD(P)-binding Rossmann-fold superfamily protein	0.000323579	0.000298813	0.000188604	0.000205375	0.000224811	0.000346607	0.000419957	0.000231602	0.000302894
Bra030540	protochlorophyllide oxidoreductase C	0.000975615	3.60377e-06	0.000909848	0.000396301	0.000569372	0.00066883	0.000324148	0.000478832	0.000519537
Bra034089	cell division cycle 48	0.000728652	0.000672882	1.78825e-06	0.000584177	0.000572853	0.000702084	0.000690182	0.000956796	1.59549e-06
Bra024627	gamma-adaptin 1	1.78117e-06	6.57937e-05	4.9833e-05	7.75203e-05	3.71248e-05	0.000111007	8.63032e-05	0.0001457	1.48205e-06
Bra014473	Transketolase	0.00342333	0.00347355	0.00309403	0.00306565	0.00327399	0.00365462	0.00288154	0.00366457	0.00286602
Bra034377	serine carboxypeptidase-like 51	0.000101737	3.13166e-06	9.48785e-05	4.91977e-05	7.06831e-05	0.000132093	7.04208e-05	2.77402e-06	8.46516e-05
Bra022878	Ribosomal protein L7Ae/L30e/S12e/Gadd45 family protein	0.000744675	0.000785919	0.000396843	0.000848829	0.000886927	0.000580125	0.000515455	0.000870205	0.000885169
Bra022067	ARM repeat superfamily protein	5.21639e-05	6.02142e-05	1.21619e-06	1.8919e-05	1.81208e-05	5.07966e-05	3.61072e-05	4.267e-05	4.34038e-05
Bra034807	TCP-1/cpn60 chaperonin family protein	0.000380251	0.000324136	0.000218227	0.000275822	0.000447083	0.000296227	0.000263205	0.000239265	0.000340732
Bra005613	purin-rich alpha 1	0.000106748	9.85774e-05	4.97759e-06	7.74315e-05	0.000111247	8.31597e-05	0.000110834	4.36598e-06	8.88211e-05
Bra006454	Ribosomal protein S5 domain 2-like superfamily protein	0.000744675	0.0014736	0.000992109	0.00131183	0.0014043	8.2875e-06	7.36364e-06	0.00113127	0.00123924
Bra013476	FAD-binding Berberine family protein	0.000115264	7.98313e-05	0.000107494	2.09022e-06	0.000180183	8.9794e-05	0.000119676	2.35714e-06	9.5907e-05
Bra010693	cold, circadian rhythm, and RNA binding 1	0.000753056	0.00121698	0.000614506	0.000682805	0.000784796	0.000586654	0.000521256	0.00077	0.000939889
Bra033629	Coatomer, alpha subunit	0.000216427	0.000223375	0.000130601	0.000203162	8.84504e-07	0.00022811	8.81222e-07	0.000302004	0.000222453
Bra027464	Transport protein particle (TRAPP) component	0.000334017	0.000308452	0.00015575	0.000181714	0.000290079	0.000390314	0.000173402	0.000273226	0.000208443
Bra001127	Ribosomal protein S3Ae	0.0013042	0.00125912	0.000773996	0.000903022	0.000988484	0.00110837	0.00102585	0.00111532	0.00128248
Bra023311	DEAD/DEAH box RNA helicase family protein	0.000145497	0.000235131	0.000101767	0.000158308	0.000202172	2.83366e-06	0.000151067	0.000238033	3.02657e-06
Bra027083	photosystem I light harvesting complex gene 3	0.00320952	0.00264631	0.0043294	0.00345056	0.00330498	0.00267891	0.00337206	0.00290668	0.00257516
Bra000047	CAX-interacting protein 2	0.000264146	9.75715e-05	9.8536e-05	7.66413e-05	0.000220223	0.000123467	0.000146271	0.0003025	4.39574e-06
Bra040079	Cytochrome bd ubiquinol oxidase, 14kDa subunit	0.000891168	0.000587829	1.18728e-05	0.000554079	0.000619153	0.000297535	0.000440611	1.04139e-05	0.00052965
Bra005980	hydroxymethylbilane synthase	0.000655696	0.000643354	3.82184e-06	0.00032699	0.000484027	0.00035118	0.000453864	3.35224e-06	0.000375088
Bra006289	Ribosomal protein S4	0.000473049	0.000436843	0.000514688	0.000514703	0.000383435	0.0006142	0.000927744	0.000386954	0.000524811
Bra025312	DegP protease 1	0.000283686	0.00019648	0.000462984	0.000282943	0.000517374	0.000248625	0.000392727	0.000319075	0.000413079
Bra009693	Mov34/MPN/PAD-1 family protein	0.000252139	0.000325978	0.000235143	0.000219473	0.000140142	0.000314279	0.000139622	0.00033	0.000251756
Bra011558	GLN phosphoribosyl pyrophosphate amidotransferase 2	5.59704e-05	0.000103373	5.21974e-05	0.000121798	1.94432e-06	0.000109007	7.7484e-05	6.86757e-05	4.65711e-05
Bra000908	GLNB1 homolog	0.000316975	7.31787e-06	0.000147804	0.000229924	0.000220223	6.17334e-06	0.000164555	0.000259286	0.000131872
Bra018232	glutathione peroxidase 2	0.000367616	0.00016974	0.000257126	0.000266657	0.000319259	0.000286384	0.000381689	0.00030071	0.000229411
Bra028906	light harvesting complex photosystem II	0.003074	0.00308773	0.00487856	0.00422485	0.00224811	0.00390721	0.00548744	0.00322036	0.00372447
Bra020200	phosphoglycerate/bisphosphoglycerate mutase family protein	0.000148275	0.000205389	0.000207419	0.000134442	0.000257541	0.000173266	0.000179609	0.000181933	0.000123374
Bra009505	Thioredoxin family protein	4.63635e-06	8.56299e-05	0.000259429	0.000134523	3.22118e-06	0.000108356	0.000128369	0.000113776	7.7155e-05
Bra031014	Transducin/WD40 repeat-like superfamily protein	0.000854961	0.00109656	0.000531552	0.000689069	0.00112199	0.00081405	0.000920567	0.000582798	0.000671862
Bra022292	TCP-1/cpn60 chaperonin family protein	0.000203982	0.00034983	0.000244584	0.00025365	0.000222703	0.000249713	0.000282388	0.000238368	0.00029096
Bra001010	voltage dependent anion channel 1	0.000337648	0.000519675	0.000262406	0.000285739	0.000508269	0.000438396	0.000584289	0.000368261	0.000374593
Bra018694	6-phosphogluconate dehydrogenase family protein	0.000280695	0.000172807	0.000174515	6.78691e-05	0.000260023	0.00021867	0.000194294	0.00019134	0.000194631
Bra003776	ribosomal protein S9	0.00074981	0.000692421	0.00039958	0.000621588	0.000446522	0.000500679	0.000444865	0.000613345	0.000534764
Bra001049	general regulatory factor 7	0.00226133	0.00258284	0.00221989	0.0018993	0.00248068	0.00236432	0.00218314	0.00233655	0.00262431
Bra001934	heat shock protein 60	0.0005922	0.000522016	0.000527176	0.000585768	0.000542353	0.000712983	0.000652135	0.000418362	0.000694329
Bra039678	Chalcone-flavanone isomerase family protein	0.000274413	0.000152046	0.000255915	0.000278671	0.000228783	0.000299287	0.000303913	0.000314258	9.13319e-05
Bra013735	AMP-dependent synthetase and ligase family protein	4.98613e-05	0.000138135	0.000232501	0.000162755	0.000225172	0.00011653	0.000138053	0.000203933	8.29757e-05
Bra002422	Stress responsive A/B Barrel Domain	0.00223882	0.00193825	0.00130494	0.00182696	0.00174988	0.00109007	0.00125912	0.00137351	0.00221213
Bra002221	ADP glucose pyrophosphorylase large subunit 1	0.000692308	0.00063932	0.000561426	0.000611348	0.000711032	0.000656575	0.000562548	0.000615552	0.000701274
Bra019637	Thioredoxin superfamily protein	6.78244e-06	0.00156583	0.00139155	0.000737966	0.000848197	0.000845397	0.00107979	0.00138701	5.64344e-06
Bra000285	Ribosomal protein L3 family protein	0.000934243	0.0010245	0.000816811	0.000720025	0.00105475	0.000955243	0.000767922	0.000811974	0.00097169
Bra037274	NADPH-dependent thioredoxin reductase A	0.000511526	0.000429432	0.000520411	0.000505971	0.000387699	0.000470948	0.00038626	0.000532545	0.000580395
Bra009331	nuclear-encoded CLP protease P7	6.52596e-06	0.00012053	0.000121721	9.46746e-05	9.06802e-05	0.000101679	0.000180688	0.000106765	5.43003e-06
Bra034318	Argonaute family protein	0.00011792	0.000155564	4.71305e-05	7.33163e-05	9.36308e-05	0.000104987	8.1623e-05	0.000124018	0.000140168
Bra027932	haloacid dehalogenase-like hydrolase family protein	0.000180253	0.000208071	0.000224136	0.000185229	0.000229595	0.000257441	0.000166358	0.000258032	0.000199976
Bra036258	chloroplast thylakoid lumen protein	0.000709214	0.000458453	0.000330703	0.000411553	0.000640559	0.00049725	0.00054	0.000580137	0.000531102
Bra006008	Pyruvate kinase family protein	9.13635e-05	0.000140618	0.000142008	0.000110454	0.000126952	0.000166075	0.000126481	7.47353e-05	0.000152041
Bra029714	elongation factor P (EF-P) family protein	6.60927e-06	0.000183102	0.000123275	9.58832e-05	9.18379e-05	0.000102977	9.14971e-05	0.000162191	5.49935e-06
Bra015131	MATE efflux family protein	0.000449014	0.000490037	0.000266474	0.00035531	0.000269419	0.000445194	0.000339056	0.000367293	0.000322662
Bra036240	photosystem I subunit D-1	0.00311749	0.00231339	0.00347843	0.00278628	0.00274608	0.00268883	0.0028515	0.00282333	0.00296452
Bra030316	triosephosphate isomerase	0.00243929	0.0020687	0.00194987	0.00227492	0.00186766	0.00201662	0.00206748	0.0021175	0.00219533
Bra033540	dihydrolipoyl dehydrogenases	0.000441401	0.000382141	0.000257279	0.000440245	0.000325837	0.000408339	0.000362819	0.000338499	0.000482048
Bra013450	plasma-membrane associated cation-binding protein 1	0.00134225	0.00106245	0.00160942	0.00157635	0.00119899	0.00164318	0.00154849	0.00104568	0.00148912
Bra032735	methionine--tRNA ligase, putative / methionyl-tRNA synthetase, putative / MetRS, putative	0.000117665	0.000144879	1.82889e-06	8.53506e-05	4.08748e-05	9.16647e-05	2.71488e-05	8.02083e-05	8.15876e-05
Bra000268	general regulatory factor 9	0.00035569	0.000273722	0.000331713	0.000258006	0.000370681	0.000277093	0.000287238	0.000387939	0.000197305
Bra026972	CLP protease proteolytic subunit 2	0.00011917	0.000146732	0.000111136	8.6442e-05	0.000137992	0.000154728	0.000109984	0.000129974	9.91571e-05
Bra028087	ribulose-bisphosphate carboxylases	0.0278535	0.0309019	0.0326588	0.025943	0.0339949	0.0350109	0.0293798	0.0385659	0.0307573
Bra019115	Arginyl-tRNA synthetase, class Ic	0.000184275	0.000121551	4.9101e-05	9.54769e-05	0.000146318	0.000123048	0.000127553	0.000150737	0.000109521
Bra003512	Ribosomal protein L7Ae/L30e/S12e/Gadd45 family protein	0.000460201	0.000637467	0.000357649	0.000445087	0.000293088	0.000537766	0.000584	0.000439185	0.000382918
Bra028068	GF14 protein phi chain	0.00226133	0.00225312	0.0020534	0.00172663	0.00248068	0.00213252	0.00177122	0.00194713	0.00242625
Bra028409	general regulatory factor 3	0.00216723	0.00205694	0.00230185	0.00170304	0.00259317	0.00229801	0.00204184	0.00226523	0.00270491
Bra037645	Phosphoribosyltransferase family protein	0.000112549	0.00020787	0.00013995	0.000136066	0.00010426	0.000204585	0.000129842	0.00018413	0.000187297
Bra004247	FTSH protease 1	0.00167911	0.00173422	0.0019574	0.00179491	0.00174988	0.00187606	0.00177398	0.0018434	0.00189348
Bra004225	Ribosomal protein L22p/L17e family protein	0.000177506	0.0004098	0.000496621	0.000643787	0.000801613	6.91414e-06	0.000737205	7.26e-06	0.000295394
Bra036182	acetoacetyl-CoA thiolase 2	0.000252256	0.000366063	0.000168037	0.000261399	0.00025037	0.00030881	0.000249441	0.000176868	0.000299849
Bra033171	Ribosomal protein L6 family	0.00168128	0.00147866	0.000821302	0.00116147	0.0016687	0.00112266	0.00166251	0.00150626	0.00119908
Bra000688	Oxidoreductase family protein	8.5811e-05	7.92432e-05	0.000240079	0.000217856	8.94278e-05	0.000167124	0.000148493	0.000140387	0.000107101
Bra029482	Phosphofructokinase family protein	0.000164068	0.000101007	0.000102006	0.000138845	9.49907e-05	0.000106512	7.57106e-05	8.94718e-05	0.000159268
Bra030843	photosystem I subunit G	0.000192941	8.90871e-06	0.000629773	0.000279907	0.000134049	0.000300615	0.000333879	0.000394565	8.027e-06
Bra031571	proliferating cellular nuclear antigen 1	0.000590562	0.000436289	0.00011015	0.0003427	0.000205151	0.000184027	0.000163512	0.000289848	0.000294832
Bra008012	PATELLIN 1	0.000994919	0.000765641	0.00123713	0.000721683	0.00109446	0.000861192	0.000918227	0.00076863	0.00119577
Bra006056	Ribosomal protein S6e	6.23767e-06	0.000979242	0.000756234	0.000361969	0.00030336	0.000826087	0.000863527	5.10241e-06	0.000882325
Bra033645	Thioredoxin superfamily protein	0.000579544	0.000321112	0.000540477	0.00050446	0.000563706	0.000451483	0.000481384	0.00056888	0.000482219
Bra013786	chloroplast heat shock protein 70-1	0.00111409	0.00106917	0.00107974	0.000934895	0.00100169	0.00115722	0.000861887	0.00110789	0.00121782
Bra028424	RmlC-like cupins superfamily protein	0.00070599	0.000391173	0.00026336	0.000512103	0.000294299	0.000274994	0.000586413	0.00028875	0.000352458
Bra013018	photosystem II stability/assembly factor, chloroplast (HCF136)	0.00134558	0.000745553	0.00125487	0.00100393	0.0010417	0.000988345	0.00103784	0.000849096	0.00108762
Bra026099	light harvesting complex photosystem II subunit 6	0.00162542	0.00155661	0.00286327	0.00262006	0.00100381	0.00229801	0.00233353	0.00231448	0.00185337
Bra034075	Ribosomal protein L4/L1 family	0.000918332	0.00125363	0.000633011	0.000955751	0.000388363	0.00115088	0.000884394	0.000653213	0.000897002
Bra004168	pfkB-like carbohydrate kinase family protein	0.000560425	0.000776297	0.000485315	0.00072592	0.000528423	0.000686068	0.000554171	0.000589407	0.000666158
Bra034200	photosynthetic electron transfer C	0.00161369	0.00180064	0.00238278	0.00180456	0.00196199	0.00193805	0.00162893	0.001925	0.00190216
Bra030790	Translation elongation factor EF1B, gamma chain	0.000246972	0.000304092	0.000307098	0.000278671	0.000381306	0.000192399	0.000246929	0.000269364	0.000433827
Bra014681	Mog1/PsbP/DUF1795-like photosystem II reaction center PsbP family protein	0.00060435	0.000390666	0.000507249	0.000526052	0.000461869	0.000517888	0.000418323	0.000543794	0.000653716
Bra022065	Mitochondrial substrate carrier family protein	0.000364841	0.000336916	0.000388853	0.000378063	0.000434535	0.000365428	0.000396846	0.000213171	0.000520408
Bra001719	Ribosomal protein L7Ae/L30e/S12e/Gadd45 family protein	0.00208015	0.00256125	0.000775971	0.00160947	0.00173426	0.00108033	0.00143985	0.00158812	0.00207699
Bra018144	light-harvesting chlorophyll-protein complex I subunit A4	0.00573197	0.00472409	0.00724239	0.00751085	0.0036398	0.00537766	0.0069113	0.00484	0.00482066
Bra006795	D-aminoacid aminotransferase-like PLP-dependent enzymes superfamily protein	0.000162212	0.000112347	0.000113458	0.000117663	0.000140874	9.47761e-05	0.000168422	0.000132689	6.74855e-05
Bra031676	Translation elongation factor EF1B, gamma chain	0.000864966	0.000659848	0.000701442	0.000681978	0.000783846	0.00073243	0.000780938	0.000707542	0.000782292
Bra014048	photosystem I light harvesting complex gene 5	0.000240803	0.000222372	0.000112285	0.000305674	8.36508e-05	0.000234491	0.000250021	9.84884e-05	0.000150273
Bra028418	acclimation of photosynthesis to environment	0.000539298	0.000249011	0.000653827	0.000234714	0.000599497	0.00042013	0.000410625	0.00048526	0.000403858
Bra002464	PDI-like 1-4	0.000312721	0.00026472	0.00014582	0.000189031	0.000253479	0.000243619	0.000198423	0.000213171	0.000368622
Bra018976	Peptidase S24/S26A/S26B/S26C family protein	0.000172575	0.000159367	0.000160942	0.000125181	0.000119899	0.000134442	5.97273e-06	0.0004235	0.000430782
Bra016154	UDP-glucose:glycoprotein glucosyltransferases;transferases, transferring hexosyl groups;transferases, transferring glycosyl groups	8.79711e-05	8.1238e-05	5.4694e-05	6.38115e-05	9.50744e-05	8.37616e-05	6.08925e-05	0.000111938	6.50647e-05
Bra012325	general regulatory factor 2	0.00129924	0.00109072	0.00121166	0.000985264	0.00143606	0.00133419	0.00122634	0.00096616	0.00137588
Bra013931	Galactose mutarotase-like superfamily protein	0.000288516	0.000133217	0.000269067	0.000209281	0.000300677	0.000224763	0.000299561	0.000118003	0.000440118
Bra020407	MIF4G domain-containing protein / MA3 domain-containing protein	8.06846e-05	3.72546e-05	5.64342e-05	4.38946e-05	5.60569e-05	4.71419e-05	2.79244e-05	9.9e-05	5.03512e-05
Bra007819	glutathione peroxidase 1	0.00093324	0.000492464	0.000435165	0.000676944	0.000787322	0.000467372	0.000784401	0.000436223	0.000554655
Bra024384	general regulatory factor 8	0.00175359	0.00144587	0.00163538	0.001272	0.0018275	0.00161005	0.00173402	0.00138321	0.00156332
Bra018797	poly(A) binding protein 8	9.51411e-05	0.000263578	0.000133091	0.000120772	0.000165252	0.000129706	9.87833e-05	0.000194564	0.000178118
Bra039999	Ribosomal protein L6 family	0.00176134	0.00147866	0.00149328	0.00145184	0.00200244	0.00130977	0.0019396	0.00144077	0.00153216
Bra016571	Translation elongation factor EF1A/initiation factor IF2gamma family protein	8.76264e-05	6.06898e-05	0.000102149	4.76711e-05	7.60998e-05	0.000119461	7.58174e-05	8.9598e-05	7.2911e-05
Bra027350	pectin methylesterase 3	0.000419778	0.000508789	0.000489351	0.00043771	0.000473927	0.000449653	0.000472168	0.000343378	0.000589415
Bra026115	Inorganic H pyrophosphatase family protein	0.00056406	0.00065111	0.000488462	0.000555277	0.000419881	0.000706211	0.000557765	0.000576751	0.000569907
Bra019446	HOPM interactor 7	8.89055e-05	9.8521e-05	2.48737e-05	5.15914e-05	4.94148e-05	9.00382e-05	5.53853e-05	7.99971e-05	6.65777e-05
Bra032757	acyl-activating enzyme 15	0.000280825	0.00027928	0.000342478	0.000329057	0.000210116	0.000403886	0.000299052	0.000300396	0.00034151
Bra003678	long chain acyl-CoA synthetase 9	0.000246536	0.000351849	0.000209016	0.000211344	0.000280284	0.000349199	0.000248217	0.000293333	0.00026108
Bra010038	beta-xylosidase 1	0.000241427	0.000111474	0.000412779	0.000248092	0.000167735	0.000203752	0.000278521	9.87435e-05	0.000301324
Bra022816	glutathione S-transferase PHI 10	0.000361204	0.000133423	0.000202113	0.000157204	0.000351333	0.000225112	0.00035003	0.000295465	0.000120218
Bra009644	elongation factor P (EF-P) family protein	0.000265048	0.000244761	0.000197745	0.000115354	0.000331463	0.000330368	0.000256848	0.000303532	0.000132322
Bra028924	heat shock protein 81-2	0.00182204	0.00184674	0.00118116	0.00172459	0.00149746	0.00167908	0.00135348	0.00174489	0.00170094
Bra016729	glyceraldehyde-3-phosphate dehydrogenase C subunit 1	0.00522308	0.00554258	0.00529827	0.00515125	0.00547505	0.00556802	0.00577188	0.00509699	0.00522276
Bra032341	glycyl-tRNA synthetase / glycine--tRNA ligase	0.000406946	0.000501066	0.000189757	0.000377182	0.000376976	0.000299411	0.000266034	0.000443843	0.000300983
Bra028948	heat shock protein 81-2	0.00189141	0.00189048	0.00122436	0.00175935	0.00148414	0.00175082	0.00134001	0.001802	0.00174041
Bra015172	Subtilase family protein	0.000122137	9.39909e-05	3.7968e-05	5.9063e-05	8.48567e-05	9.51487e-05	7.04516e-05	8.32569e-05	8.46885e-05
Bra003891	Sec14p-like phosphatidylinositol transfer family protein	0.000184902	8.53751e-05	0.000201178	0.000223537	8.56425e-05	0.000192059	0.000149318	0.000100833	0.000230776
Bra003241	GroES-like zinc-binding alcohol dehydrogenase family protein	0.000133035	9.21393e-05	6.20333e-05	7.23744e-05	9.24278e-05	0.000103638	0.000115106	5.44111e-05	0.000110694
Bra024401	Zincin-like metalloproteases family protein	0.00034952	0.000262249	0.000325959	0.000285222	0.000303543	0.000340358	0.000241933	0.000410991	0.000309
Bra026982	Pentapeptide repeat-containing protein	0.000334017	0.000462678	0.000415334	0.000565333	0.00042545	0.00026021	0.000269736	0.000455376	0.000509528
Bra034603	poly(A) binding protein 2	0.00015055	0.000162199	7.02009e-05	5.46023e-05	0.000156896	0.000195472	6.94728e-05	0.000143675	0.000167024
