# Supplementary material for: Shotgun Quantitative Proteomic Analysis of Proteins Responding to Drought Stress in Brassica rapa L. (Inbred Line “Chiifu”)
Source: Int J Genomics. 2016 Jun 21;2016:4235808. doi: 10.1155/2016/4235808 (PMC4932182; doi:10.1155/2016/4235808)
Supplement: Supplementary file 1 — Supplementary table 1. List of total 3,009 identified non-redundant proteins. Supplementary table 2. List of identified non-redundant proteins from each sample. Supplementary table 3. Relative expression amount of the 1,567 proteins among the treatments and replications. Supplementary table 4. Relative amount of 440 differentially expressed proteins. Supplementary table 5. Average of relative amount of proteins in each groups. Supplementary table 6. Enriched GO terms of proteins in each groups. [file 4235808.f1.zip › sup.table S4.xlsx]

## Sheet: Sheet1
	Supplementary table 4. relative amount of 440 differentially expressed proteins
Accession	Description	0hr 1	0hr 2	0hr 3	24hr 1	24hr 2	24hr 3	48hr 1	48hr 2	48hr 3	P value
Bra016644	heat shock protein 70B	2.38951e-06	2.20662e-06	2.22843e-06	1.73327e-06	1.66015e-06	1.8615e-06	0.000992392	0.00109458	0.00117305	2.95939e-11
Bra012203	ferredoxin-NADP(+)-oxidoreductase 2	4.23209e-06	3.90818e-06	3.94681e-06	0.00199539	0.00211703	0.00217598	2.9294e-06	3.46185e-06	3.52138e-06	4.32197e-11
Bra024101	H(+)-ATPase 2	0.000686488	0.000744886	0.000688227	1.24489e-06	1.19237e-06	1.33699e-06	1.18795e-06	1.40387e-06	1.42801e-06	6.34382e-11
Bra027756	P-loop containing nucleoside triphosphate hydrolases superfamily protein	1.86905e-06	1.72599e-06	1.74305e-06	1.35575e-06	1.29855e-06	1.45605e-06	0.000181122	0.000152888	0.000171069	1.91764e-10
Bra016481	ferredoxin-NADP(+)-oxidoreductase 2	0.00209082	0.00224602	0.00171111	3.09513e-06	2.96455e-06	3.32411e-06	0.00197888	0.00209423	0.00213024	2.03696e-10
Bra017233	ENTH/VHS family protein	1.17398e-06	1.08413e-06	1.09484e-06	8.5157e-07	8.15642e-07	9.14569e-07	0.000195028	0.00021127	0.000244208	2.43548e-10
Bra019953	acetyl Co-enzyme a carboxylase biotin carboxylase subunit	3.10016e-06	2.86288e-06	2.89117e-06	0.000787065	0.000818475	0.000941896	2.14589e-06	2.53593e-06	2.57954e-06	2.57666e-10
Bra003256	dicarboxylate diiron protein, putative (Crd1)	3.7975e-06	3.50685e-06	3.54151e-06	2.75459e-06	2.63837e-06	2.95837e-06	0.000262858	0.000279572	0.000315977	3.27602e-10
Bra017018	Eukaryotic translation initiation factor 2 subunit 1	7.24093e-05	6.68672e-05	6.75281e-05	2.62617e-06	2.51537e-06	2.82045e-06	2.50604e-06	2.96154e-06	3.01246e-06	3.3239e-09
Bra006391	PHYTOENE SYNTHASE	7.50328e-05	6.92899e-05	6.99748e-05	2.72132e-06	2.60651e-06	2.92264e-06	2.59684e-06	3.06884e-06	3.12161e-06	3.3239e-09
Bra004054	UDP-Glycosyltransferase / trehalose-phosphatase family protein	1.79974e-06	1.66199e-06	1.67842e-06	1.30548e-06	1.2504e-06	1.40206e-06	2.49152e-05	2.94438e-05	2.99501e-05	5.88108e-09
Bra000115	hydroxyproline-rich glycoprotein family protein	4.76435e-06	4.3997e-06	4.44319e-06	3.45591e-06	3.31011e-06	3.71158e-06	6.59565e-05	7.79448e-05	7.92851e-05	5.88108e-09
Bra002840	LORELEI-LIKE-GPI-ANCHORED PROTEIN 1	2.01712e-05	1.86273e-05	1.88114e-05	1.46315e-05	1.40142e-05	1.5714e-05	0.000279244	0.00033	0.000335675	5.88108e-09
Bra014904	HISTIDINE TRIAD NUCLEOTIDE-BINDING 2	8.48732e-06	7.83771e-06	7.91518e-06	6.15644e-06	5.89669e-06	6.61188e-06	0.000117496	0.000138852	0.00014124	5.88108e-09
Bra000035	vacuoleless1 (VCL1)	1.89412e-06	1.74915e-06	1.76644e-06	1.37394e-06	1.31597e-06	1.47558e-06	2.62217e-05	3.09878e-05	3.15207e-05	5.88108e-09
Bra011869	cold, circadian rhythm, and RNA binding 1	0.000671127	0.000885371	0.000625886	6.95449e-06	6.66108e-06	7.46898e-06	6.63636e-06	7.84259e-06	7.97745e-06	1.11353e-08
Bra028547	P-loop containing nucleoside triphosphate hydrolases superfamily protein	3.1633e-06	2.92118e-06	2.95006e-06	2.29456e-06	2.19775e-06	2.46431e-06	6.56878e-05	5.17515e-05	5.26414e-05	1.43082e-08
Bra019384	Uncharacterised protein family (UPF0041)	1.43813e-05	1.32806e-05	1.34118e-05	1.04317e-05	9.99162e-06	1.12035e-05	0.000497727	0.000470555	0.000358985	2.06778e-08
Bra022867	ACT domain-containing small subunit of acetolactate synthase protein	3.32586e-06	3.07131e-06	3.10167e-06	9.64992e-05	6.93209e-05	7.77285e-05	2.30212e-06	2.72056e-06	2.76734e-06	4.71207e-08
Bra033604	Glucose-1-phosphate adenylyltransferase family protein	2.96975e-06	2.74245e-06	2.76956e-06	2.15416e-06	2.06328e-06	2.31353e-06	0.000143894	0.000145755	0.000222392	5.19534e-08
Bra005640	ACT domain-containing small subunit of acetolactate synthase protein	0.000139926	9.69123e-05	9.78702e-05	2.53745e-06	2.43039e-06	2.72517e-06	2.42138e-06	2.86149e-06	2.91069e-06	6.97903e-08
Bra006067	Zincin-like metalloproteases family protein	2.23479e-06	2.06374e-06	2.08414e-06	1.62105e-06	1.55265e-06	1.74097e-06	0.000154689	0.000274209	0.000185949	7.03841e-08
Bra004323	Ribosomal protein PSRP-3/Ycf65	9.24511e-06	8.53751e-06	8.6219e-06	0.000268245	0.000321159	0.000216067	6.39935e-06	7.5625e-06	7.69254e-06	7.25507e-08
Bra015607	Serine protease inhibitor (SERPIN) family protein	3.96219e-06	3.65893e-06	3.6951e-06	2.87405e-06	2.75279e-06	3.08667e-06	8.22774e-05	9.72321e-05	6.59361e-05	7.35535e-08
Bra013385	RNAse l inhibitor protein 2	0.000213863	0.000172807	0.000124654	1.93912e-06	1.85731e-06	2.08257e-06	1.85042e-06	2.18675e-06	2.22435e-06	8.98522e-08
Bra000998	glucuronokinase G	8.62877e-05	7.96834e-05	8.0471e-05	3.12952e-06	2.99749e-06	3.36104e-06	8.95909e-05	7.05833e-05	0.000107696	9.73318e-08
Bra003601	Protein kinase superfamily protein	1.34591e-06	1.2429e-06	1.25518e-06	9.7628e-07	9.35091e-07	1.0485e-06	2.79486e-05	4.40381e-05	3.35965e-05	1.14385e-07
Bra022325	Eukaryotic aspartyl protease family protein	3.1633e-06	2.92118e-06	2.95006e-06	0.000229456	0.00026373	0.000197144	0.000306543	0.00018113	0.000263207	1.27576e-07
Bra039315	signal recognition particle receptor protein, chloroplast (FTSY)	9.86145e-05	0.0001366	9.19669e-05	3.5766e-06	3.4257e-06	3.84119e-06	3.41299e-06	4.03333e-06	4.10269e-06	1.34797e-07
Bra017684	subtilisin-like serine protease 2	2.025e-06	1.87002e-06	1.8885e-06	1.46888e-06	1.4069e-06	1.57754e-06	5.60673e-05	8.28227e-05	5.05481e-05	1.74621e-07
Bra009706	ribosomal protein S11-beta	9.76842e-06	9.02077e-06	9.10993e-06	0.000354285	0.00027147	0.000456594	6.76158e-06	7.99056e-06	8.12797e-06	1.8238e-07
Bra033545	Papain family cysteine protease	4.22059e-06	3.89756e-06	3.93608e-06	3.06149e-06	2.93232e-06	3.28797e-06	0.000204501	0.000138098	0.000245827	1.87283e-07
Bra024444	voltage dependent anion channel 2	5.62746e-06	5.19675e-06	5.24811e-06	4.08198e-06	3.90976e-06	4.38396e-06	0.000272668	0.000506359	0.000468242	2.11236e-07
Bra024809	ssDNA-binding transcriptional regulator	5.95088e-06	5.49541e-06	5.54973e-06	0.000215829	0.000165379	0.000139078	0.000164765	0.000194713	0.000148546	2.14201e-07
Bra007284	dicarboxylate diiron protein, putative (Crd1)	0.000389686	0.000479814	0.000294195	0.000215365	0.000219171	0.000390314	1.28446e-06	1.51792e-06	1.54402e-06	2.50778e-07
Bra024300	Phosphoglycerate mutase family protein	0.000159029	0.000146857	9.88723e-05	3.84515e-06	3.68292e-06	4.12961e-06	3.66925e-06	4.33618e-06	4.41074e-06	2.58824e-07
Bra022262	unknown protein;	0.000247848	0.000228878	0.000154093	5.9927e-06	5.73987e-06	6.43603e-06	5.71857e-06	6.75798e-06	6.87419e-06	2.58824e-07
Bra012095	Protein phosphatase 2C family protein	0.000113925	0.000105205	7.08302e-05	2.75459e-06	2.63837e-06	2.95837e-06	2.62858e-06	3.10636e-06	3.15977e-06	2.58824e-07
Bra039029	NADP-malic enzyme 1	2.66869e-06	2.46444e-06	2.48879e-06	1.93579e-06	1.85411e-06	2.07899e-06	0.000258613	0.000130979	0.000155437	3.14846e-07
Bra028015	unknown protein;	0.000225098	0.000311805	0.000314887	0.000326559	0.000234586	0.000350717	7.79052e-06	9.20652e-06	9.36483e-06	4.25951e-07
Bra009660	lysm domain GPI-anchored protein 2 precursor	4.29055e-06	3.96216e-06	4.00132e-06	6.22446e-05	8.94278e-05	0.000100274	2.96986e-06	3.50967e-06	3.57002e-06	4.41428e-07
Bra012557	|	2.58432e-06	2.38653e-06	2.41011e-06	3.74918e-05	5.3865e-05	6.03981e-05	1.78884e-06	2.11398e-06	2.15033e-06	4.41428e-07
Bra017819	cytochrome P450, family 81, subfamily D, polypeptide 8	3.11883e-06	2.88012e-06	2.90859e-06	2.2623e-06	2.16686e-06	2.42967e-06	0.000345411	0.000204096	0.000155704	6.07716e-07
Bra006196	Auxin-responsive GH3 family protein	5.11756e-05	7.08881e-05	9.54516e-05	1.85606e-06	1.77775e-06	1.99337e-06	1.77116e-06	2.09308e-06	2.12907e-06	6.17019e-07
Bra004940	Remorin family protein	0.000404474	0.000373516	0.00045265	0.000528107	0.000281014	0.000567175	5.59943e-06	6.61719e-06	6.73097e-06	8.44545e-07
Bra021273	B-cell receptor-associated 31-like	1.20401e-05	1.11186e-05	1.12285e-05	8.73355e-06	8.36508e-06	9.37965e-06	0.000166681	0.000295465	0.000200364	8.65699e-07
Bra021322	lipoxygenase 1	1.81234e-06	1.67363e-06	1.69017e-06	3.94385e-05	6.29577e-05	5.64749e-05	0.000100359	8.89498e-05	6.03196e-05	9.55661e-07
Bra031031	methylthioalkylmalate synthase-like 4	0.000322031	0.000343134	0.00013861	1.79685e-06	1.72104e-06	1.92978e-06	1.71466e-06	2.02632e-06	2.06116e-06	1.38914e-06
Bra000913	tolB protein-related	2.38951e-06	2.20662e-06	2.22843e-06	1.73327e-06	1.66015e-06	1.8615e-06	4.96196e-05	3.90923e-05	7.95291e-05	1.87211e-06
Bra009023	Glycosyl hydrolase family protein	1.96108e-06	1.81099e-06	1.82889e-06	7.11255e-05	5.44997e-05	6.11098e-05	5.42975e-05	3.20833e-05	6.52701e-05	2.40052e-06
Bra026341	early nodulin-like protein 2	4.7353e-06	4.37287e-06	4.41609e-06	0.000240439	0.000230295	0.000110668	0.000294995	0.000271143	0.000394008	2.84135e-06
Bra019494	LOCATED IN: thylakoid, chloroplast thylakoid membrane, chloroplast, chloroplast envelope; EXPRESSED IN: 22 plant structures; EXPRESSED DURING: 13 growth stages; CONTAINS InterPro DOMAIN/s: Thylakoid soluble phosphoprotein TSP9 (InterPro:IPR021584); Has 37 Blast hits to 37 proteins in 10 species: Archae - 0; Bacteria - 0; Metazoa - 0; Fungi - 0; Plants - 37; Viruses - 0; Other Eukaryotes - 0 (sour…	0.000301588	0.000696263	0.000562516	0.00120319	0.0015715	0.000939786	1.04378e-05	1.23349e-05	1.25471e-05	3.00675e-06
Bra029121	CAP160 protein	2.35687e-06	2.17648e-06	2.19799e-06	1.7096e-06	1.63747e-06	1.83608e-06	4.89419e-05	7.71168e-05	0.000117664	3.0509e-06
Bra019044	early nodulin-like protein 2	2.17837e-06	2.01164e-06	2.03153e-06	4.74037e-05	4.54037e-05	6.78807e-05	6.03137e-05	0.000124733	9.06274e-05	3.09578e-06
Bra034219	two-pore channel 1	2.1542e-06	1.98932e-06	2.00899e-06	7.81295e-05	4.48999e-05	8.39095e-05	0.000149111	8.81068e-05	8.96218e-05	3.20267e-06
Bra007758	unknown protein;	6.75295e-06	6.23609e-06	6.29773e-06	0.000195935	9.38343e-05	0.000157823	4.67431e-06	5.52391e-06	5.6189e-06	3.30949e-06
Bra007994	HISTIDINE BIOSYNTHESIS 6B	2.86037e-06	2.64144e-06	2.66755e-06	0.000103741	0.000178856	8.91325e-05	5.93973e-05	7.01934e-05	9.52005e-05	3.39911e-06
Bra028459	unknown protein;	7.52846e-05	6.41746e-05	3.78052e-05	8.4014e-06	1.20704e-05	1.80459e-05	4.00854e-07	4.73714e-07	4.81859e-07	3.6558e-06
Bra034344	Calcium-dependent phosphotriesterase superfamily protein	4.19778e-06	3.87649e-06	3.91481e-06	3.04494e-06	2.91647e-06	3.2702e-06	0.000348678	0.000137351	0.000349283	3.89481e-06
Bra025920	ketose-bisphosphate aldolase class-II family protein	1.15909e-06	1.07037e-06	1.08095e-06	2.5223e-05	1.61059e-05	1.80593e-05	4.81384e-05	5.6888e-05	2.89331e-05	4.0402e-06
Bra016524	CONTAINS InterPro DOMAIN/s: Protein of unknown function DUF985 (InterPro:IPR009327), RmlC-like jelly roll fold (InterPro:IPR014710); Has 1465 Blast hits to 1465 proteins in 584 species: Archae - 10; Bacteria - 1038; Metazoa - 19; Fungi - 43; Plants - 51; Viruses - 0; Other Eukaryotes - 304 (source: NCBI BLink).	8.26159e-06	7.62926e-06	7.70467e-06	0.000179781	0.000286993	0.000128721	5.71857e-06	6.75798e-06	6.87419e-06	4.06482e-06
Bra031219	copper ion binding;cobalt ion binding;zinc ion binding	0.000256724	0.000177806	0.000359127	0.000139665	0.000267544	0.000249995	4.44253e-06	5.25e-06	5.34028e-06	5.30906e-06
Bra037580	Eukaryotic aspartyl protease family protein	0.000155629	5.7487e-05	8.70829e-05	2.25777e-06	2.16251e-06	2.4248e-06	2.15449e-06	2.54609e-06	2.58987e-06	7.11948e-06
Bra027049	ACC oxidase 2	4.85368e-06	4.48219e-06	4.5265e-06	0.000140828	0.000134887	7.56234e-05	0.000335966	0.000158812	0.000201929	8.67949e-06
Bra011830	myo-inositol-1-phosphate synthase 1	3.04545e-06	2.81236e-06	2.84015e-06	0.000198817	0.000380857	0.000877825	2.10802e-06	2.49118e-06	2.53401e-06	1.03327e-05
Bra031205	Adenine nucleotide alpha hydrolases-like superfamily protein	8.26159e-06	7.62926e-06	7.70467e-06	0.000239708	0.000286993	0.000128721	0.000171557	0.000270319	0.000274967	1.07236e-05
Bra013576	Peroxidase superfamily protein	4.69238e-06	4.33324e-06	4.37607e-06	0.000102111	0.000260808	0.000292441	3.24801e-06	3.83837e-06	3.90437e-06	1.09943e-05
Bra030768	Protein of unknown function, DUF538	9.19041e-06	8.48699e-06	8.57088e-06	0.000333322	0.000446962	0.000143192	0.000572534	0.000676598	0.000611762	1.18184e-05
Bra022440	Glycosyl hydrolase family protein	2.0145e-06	1.86031e-06	1.8787e-06	4.38377e-05	8.39763e-05	3.13871e-05	9.76088e-05	6.59144e-05	6.70478e-05	1.44497e-05
Bra023707	Aluminium induced protein with YGL and LRDR motifs	9.24511e-06	8.53751e-06	8.6219e-06	0.000335306	0.000385391	0.000504156	0.000447955	0.0003025	0.000153851	1.50764e-05
Bra003428	N-terminal nucleophile aminohydrolases (Ntn hydrolases) superfamily protein	0.000417896	0.000192955	0.000129908	5.05214e-06	4.83899e-06	5.42589e-06	4.82104e-06	5.69731e-06	5.79528e-06	1.69811e-05
Bra005153	Bifunctional inhibitor/lipid-transfer protein/seed storage 2S albumin superfamily protein	1.35059e-05	1.24722e-05	1.25955e-05	0.000783741	0.000750675	0.00021043	0.00130881	0.00110478	0.00134854	3.1174e-05
Bra017469	Thiolase family protein	3.59532e-06	3.32014e-06	3.35296e-06	2.60793e-06	2.4979e-06	2.80087e-06	0.000398182	8.82292e-05	0.000209408	3.27877e-05
Bra005012	delta1-pyrroline-5-carboxylate synthase 1	2.16622e-06	2.00042e-06	2.02019e-06	0.000848506	0.000647156	0.000118129	0.00110958	0.00122266	0.00122566	3.28671e-05
Bra023545	NAD(P)-binding Rossmann-fold superfamily protein	5.73129e-06	5.29263e-06	5.34494e-06	0.000124719	0.000199095	8.9297e-05	0.000158685	0.00023441	9.53762e-05	3.76127e-05
Bra025649	avirulence induced gene 2 like protein	1.10155e-05	1.01724e-05	1.02729e-05	0.000559319	0.000153063	0.000257441	0.000457486	0.000450532	0.000366623	4.16631e-05
Bra019170	Double Clp-N motif protein	0.000198278	0.000366205	0.000184912	0.000143825	0.000596946	0.000257441	4.57486e-06	5.40638e-06	5.49935e-06	7.10716e-05
Bra016002	kunitz trypsin inhibitor 1	7.25784e-06	6.70234e-06	6.76859e-06	0.000631754	0.000252125	0.000169623	0.00095452	0.000356215	0.00042273	7.55029e-05
Bra016748	eukaryotic release factor 1-2	7.14105e-05	6.59449e-05	9.98951e-05	2.58995e-06	2.48068e-06	2.78155e-06	4.94295e-05	0.000116828	0.000207964	8.17427e-05
Bra002289	sucrose phosphate synthase 1F	1.49057e-06	1.37649e-06	1.39009e-06	3.24365e-05	3.1068e-05	5.80602e-05	2.06351e-05	7.31574e-05	4.96103e-05	9.86737e-05
Bra001931	glutathione-disulfide reductase	0.000320905	0.000296343	0.000299272	0.000395716	0.000379021	0.00044999	0.000533103	0.000525	0.000507326	0.000100095
Bra008811	elongation factor family protein	0.000184354	0.000148963	0.000107454	3.34311e-05	6.40412e-05	0.000197474	1.59509e-06	1.88501e-06	1.91743e-06	0.000128456
Bra040854	PATELLIN 2	0.000505993	0.000528213	0.000512917	0.000207453	0.000229269	0.000274215	0.000319786	0.000377911	0.000329494	0.000194648
Bra035074	vacuolar ATP synthase subunit A	0.00164542	0.00168064	0.0016275	0.00198923	0.0018187	0.00180622	0.00232965	0.00222286	0.00213663	0.000327512
Bra014308	myrosinase-binding protein 2	0.000169515	0.000136973	0.000138327	0.000245921	0.000191381	0.000264114	0.000484011	0.00036399	0.000423142	0.000358527
Bra026349	protochlorophyllide oxidoreductase B	0.00124094	0.00158956	0.000821302	0.000406515	0.000556234	0.000654883	8.31256e-05	0.000196469	0.000133232	0.000655772
Bra011839	FK506-binding protein 16-2	0.000543613	0.000502006	0.000434544	0.000225326	0.000215819	0.000181496	0.000268773	0.00038115	0.000323087	0.00076162
Bra036764	annexin 1	0.00102892	0.000950168	0.000639707	0.00213242	0.00180416	0.00129776	0.00383234	0.00296584	0.00399527	0.000773051
Bra034402	annexin 1	0.00129033	0.00123571	0.00093594	0.00228792	0.00215819	0.00156366	0.00387033	0.00293192	0.00405598	0.000862983
Bra011412	aminopeptidase M1	0.000231287	0.000295732	0.000248879	0.000412968	0.000432627	0.000374219	0.000443337	0.00058213	0.000488516	0.00112103
Bra033657	Granulin repeat cysteine protease family protein	0.000506471	0.000498888	0.000503819	0.000416362	0.000351879	0.000394557	0.000490802	0.000524772	0.000533796	0.00130849
Bra011449	3-deoxy-d-arabino-heptulosonate 7-phosphate synthase	0.000277353	0.000288141	0.000258657	0.000276627	0.00031313	0.000459142	0.000143985	0.000113437	0.000144235	0.00139814
Bra009483	glutamate synthase 1	0.00110257	0.00102703	0.0011713	0.00104317	0.00113238	0.00123238	0.000703455	0.000839157	0.000725948	0.00153132
Bra016270	Aldolase superfamily protein	0.000510434	0.000404029	0.000340018	0.00031736	0.000354632	0.000426047	0.000201895	0.000178944	0.000151684	0.0016412
Bra024580	glutamate:glyoxylate aminotransferase	0.00211206	0.00201042	0.00239393	0.00188557	0.00185117	0.00215163	0.00137198	0.00154161	0.0014059	0.0017202
Bra016357	Phosphoglucomutase/phosphomannomutase family protein	0.000586105	0.000565848	0.00052175	0.000560415	0.000610808	0.000518857	0.00082983	0.000740943	0.000908855	0.00180092
Bra016330	aldehyde dehydrogenase 2B7	0.000260309	0.000240386	0.000323682	0.000398621	0.000341613	0.000405578	0.000500508	0.000449525	0.000505387	0.00211897
Bra040093	acyl-CoA oxidase 1	7.01737e-05	4.32019e-05	6.54433e-05	0.000169673	0.000162514	9.11125e-05	0.000242867	0.000210474	0.000194631	0.00236019
Bra027209	phospholipase D alpha 1	0.000230101	0.000194782	0.000178825	0.000292089	0.000279765	0.000313697	0.000318546	0.000282333	0.000287188	0.00258485
Bra024417	2-oxoglutarate dehydrogenase, E1 component	0.000122539	9.90149e-05	8.57088e-05	0.000122218	0.000117062	0.000143192	0.000180242	0.000225533	0.000191176	0.00277945
Bra007041	high cyclic electron flow 1	0.00165072	0.00166296	0.00209924	0.00182329	0.00177243	0.00192894	0.00122051	0.00125822	0.00131108	0.00281776
Bra028288	GroES-like zinc-binding alcohol dehydrogenase family protein	0.000269337	0.000248723	0.000376772	0.000130246	0.000155939	0.000104911	0.000217504	0.000220318	0.000224106	0.00296945
Bra030858	chaperonin 60 beta	0.00266002	0.00262296	0.00241763	0.00220747	0.00261551	0.00266932	0.00179442	0.00197305	0.00183817	0.00322611
Bra016353	glutamate:glyoxylate aminotransferase	0.00230702	0.00222047	0.00254544	0.00193271	0.00182859	0.00227819	0.00141696	0.00167451	0.00151405	0.0034279
Bra032750	S-adenosyl-L-homocysteine hydrolase	0.001313	0.0012125	0.000985563	0.00174221	0.00198019	0.00169646	0.00183985	0.00165034	0.00173201	0.00345403
Bra033287	RNA-binding (RRM/RBD/RNP motifs) family protein	0.000485368	0.000522922	0.000377208	0.000234714	0.00039342	0.000315097	0.000167983	0.000132344	0.000201929	0.00345934
Bra024568	Phosphoglucomutase/phosphomannomutase family protein	0.000612746	0.000565848	0.000546596	0.000599064	0.000647827	0.000664137	0.000774508	0.000849906	0.00101969	0.00348137
Bra006138	Nitrilase/cyanide hydratase and apolipoprotein N-acyltransferase family protein	0.000213349	0.000197019	0.00023876	0.000154757	0.000207518	0.000166205	0.000295355	0.000279231	0.000284032	0.00369046
Bra011919	chaperonin 60 beta	0.00293776	0.00278368	0.00257296	0.00231626	0.00271549	0.00276622	0.00196275	0.00211053	0.00193427	0.00381816
Bra005141	acetyl Co-enzyme a carboxylase carboxyltransferase alpha subunit	0.000303751	0.000317903	0.000321045	0.000176265	0.000196966	0.000236631	0.000112135	0.00018221	0.000151644	0.00388262
Bra011664	Ribosomal protein L2 family	0.00102341	0.00116745	0.000785996	0.000611348	0.00054373	0.000656575	0.00104175	0.00103413	0.00120218	0.00403837
Bra032118	Cytosol aminopeptidase family protein	0.00125208	0.00104613	0.00119548	0.00181644	0.00161554	0.00164891	0.00156827	0.00131683	0.0014635	0.00408759
Bra001470	phosphoglycerate kinase 1	0.00449267	0.00444515	0.00520734	0.00500465	0.00470432	0.00527489	0.00373172	0.0039375	0.00365809	0.00425967
Bra017436	ARM repeat superfamily protein	4.23209e-05	5.86227e-05	3.94681e-05	6.13966e-05	5.88063e-05	6.59387e-05	2.9294e-05	3.46185e-05	3.52138e-05	0.00429255
Bra003345	ketol-acid reductoisomerase	0.000975681	0.00109582	0.000737765	0.000535579	0.000677869	0.000760086	0.000438068	0.000409839	0.00048271	0.00443795
Bra026004	SOUL heme-binding family protein	0.000201712	0.000248364	0.000188114	0.000341402	0.000373713	0.000419039	0.000372326	0.000495	0.000335675	0.00444707
Bra007002	chloroplast RNA-binding protein 29	0.00024043	0.000444056	0.000224223	6.97602e-05	3.34085e-06	3.74605e-06	3.32846e-06	3.93344e-06	4.00107e-06	0.00456664
Bra038734	heat shock protein 70	0.00176823	0.00172116	0.00151533	0.00178527	0.00207518	0.00188011	0.00216672	0.00236508	0.00248528	0.00467245
Bra038863	photosystem II subunit O-2	0.00648324	0.0060301	0.00713365	0.00436441	0.00463395	0.00454195	0.0045199	0.00564667	0.00535567	0.00487873
Bra033478	Rubredoxin-like superfamily protein	0.000501025	0.000616904	0.000545126	0.000363428	0.000406111	0.000390314	0.000346804	0.000273226	0.000208443	0.0050013
Bra027196	MAR binding filament-like protein 1	0.000151003	9.96043e-05	0.000120707	1.56476e-06	1.49874e-06	1.68052e-06	1.49318e-06	3.52917e-05	1.79493e-06	0.00507549
Bra004244	Zincin-like metalloproteases family protein	8.12332e-05	0.000105022	9.09087e-05	0.000129633	0.000158026	0.000126566	8.99658e-05	7.97385e-05	6.75914e-05	0.00514628
Bra028922	TCP-1/cpn60 chaperonin family protein	0.00183964	0.00157749	0.00161759	0.0012391	0.00140593	0.0015355	0.00107327	0.00122536	0.00100589	0.00539129
Bra039342	phosphoglycerate kinase 1	0.00504783	0.00493041	0.00564303	0.0052576	0.00492337	0.00552051	0.00409878	0.00439381	0.00409243	0.00546337
Bra037182	ferredoxin-NADP(+)-oxidoreductase 1	0.00248166	0.0022127	0.00219466	0.00183116	0.0020809	0.00223329	0.00165854	0.00161	0.00174449	0.00547307
Bra037682	O-acetylserine (thiol) lyase B	0.00215608	0.00176983	0.00212245	0.00223009	0.00235792	0.00217733	0.00154769	0.00143707	0.00172756	0.00552729
Bra028624	peroxisomal NAD-malate dehydrogenase 2	0.0019957	0.00184296	0.00210394	0.00229731	0.00298409	0.00229828	0.00165168	0.00163249	0.00169666	0.00553999
Bra038797	tripeptidyl peptidase ii	1.18112e-06	1.09072e-06	3.30451e-05	8.56751e-07	8.20604e-07	9.20133e-07	8.99316e-05	0.000115939	8.84496e-05	0.00560644
Bra028181	Ribulose bisphosphate carboxylase (small chain) family protein	0.0327893	0.0325817	0.0328143	0.0292784	0.0273104	0.0261414	0.0214355	0.0265864	0.0207414	0.00571847
Bra039301	plasma membrane intrinsic protein 1B	0.000998472	0.0010245	0.00103463	0.000603551	0.000501008	0.000734627	0.000806318	0.000680625	0.000784639	0.00593548
Bra002116	Cobalamin-independent synthase family protein	0.00241606	0.00279361	0.00217745	0.00343143	0.00407658	0.00343221	0.00299339	0.0029562	0.00287188	0.00600815
Bra022964	Apoptosis inhibitory protein 5 (API5)	2.81884e-06	5.20618e-05	2.62882e-06	0.000122682	0.000176259	0.000109798	1.95116e-06	2.30581e-06	2.34546e-06	0.00601498
Bra002468	4-hydroxy-3-methylbut-2-enyl diphosphate synthase	0.000604263	0.000620015	0.000480043	0.000389612	0.000342076	0.000557913	0.000170403	0.000292911	0.000167595	0.00602436
Bra010189	UDP-Glycosyltransferase superfamily protein	0.000254619	0.000313509	0.000237455	0.000107738	0.000191643	0.000297535	1.4687e-06	3.47131e-05	1.7655e-06	0.00614914
Bra031790	aspartic proteinase A1	2.52549e-06	4.6644e-05	7.06575e-05	1.83191e-06	1.75463e-06	1.96744e-06	0.00029718	0.000103293	0.000189124	0.00638275
Bra037389	thylakoid rhodanese-like	0.00061042	0.000501066	0.00066415	0.000418181	0.000400537	0.000501954	0.000352104	0.000277402	0.000366823	0.00662981
Bra032110	aldehyde dehydrogenase 11A3	0.000313141	0.000520513	0.000321235	0.000885856	0.000979018	0.000707445	0.000520205	0.000537913	0.000442942	0.00665516
Bra034107	P-loop containing nucleoside triphosphate hydrolases superfamily protein	9.38477e-05	8.66648e-05	0.000175043	0.000306334	0.000293409	0.000292441	0.0001624	0.000153535	0.000117131	0.00676249
Bra021863	NAD(P)-binding Rossmann-fold superfamily protein	4.83856e-06	4.46823e-06	9.02479e-05	3.50974e-06	3.36167e-06	3.76939e-06	0.000234444	0.000158318	0.0002013	0.00695024
Bra006965	Pyruvate kinase family protein	0.000294721	0.00029938	0.000302339	0.000470319	0.000470952	0.000551032	0.000673207	0.000409839	0.000588545	0.00700352
Bra007085	tryptophan synthase alpha chain	0.000499414	0.00046119	0.000186299	0.000579616	0.000451069	0.000544683	0.000172844	8.17042e-05	8.31091e-05	0.00729249
Bra034800	Adenine nucleotide alpha hydrolases-like superfamily protein	0.000155318	0.00014343	7.24239e-06	5.63314e-06	5.39547e-06	6.04987e-06	0.000322527	0.00038115	0.000323087	0.00746961
Bra029563	photosystem II subunit Q-2	0.00384858	0.0041252	0.00429416	0.00468597	0.004918	0.00348001	0.00223581	0.00236111	0.00303073	0.00765895
Bra000460	glutathione S-transferase phi 8	0.00166154	0.00186793	0.00181902	0.00225326	0.00235895	0.00191345	0.00270023	0.00230463	0.00276502	0.00783621
Bra028406	Ribulose bisphosphate carboxylase (small chain) family protein	0.0207663	0.020841	0.0193664	0.0169305	0.0162759	0.0156428	0.0117013	0.0159339	0.0142801	0.00810155
Bra035836	glutamate-1-semialdehyde-2,1-aminomutase	0.00118212	0.00133423	0.00110244	0.00135767	0.00143727	0.00150927	0.00100008	0.00104756	0.00114754	0.00814686
Bra010728	rotamase CYP 1	0.000722409	0.000750507	0.000757925	0.00209605	0.00138024	0.000984863	0.00187516	0.00162506	0.00240437	0.00836272
Bra011329	ATPase, F0 complex, subunit B/B', bacterial/chloroplast	0.00203811	0.00194702	0.00242505	0.002396	0.00161132	0.00202575	0.00136211	0.00109228	0.0012865	0.00856888
Bra030945	phosphoenolpyruvate carboxylase 1	0.000370572	0.00032733	0.000330566	0.000444106	0.000514921	0.000527167	0.000390334	0.00048764	0.000415589	0.00865695
Bra040136	unknown protein;	0.000245423	0.000129508	9.80911e-05	2.54318e-06	2.43588e-06	5.46264e-05	2.42684e-06	2.86795e-06	2.91726e-06	0.00899857
Bra015314	Lactate/malate dehydrogenase family protein	0.00149704	0.00177128	0.00148338	0.00207001	0.00204768	0.0018587	0.00197532	0.00195167	0.00206308	0.00909902
Bra010280	Uncharacterised BCR, YbaB family COG0718	0.000678985	0.000705394	0.000712366	0.00043095	0.000530702	0.000528951	0.000528733	0.00055541	0.000635581	0.00918762
Bra037714	Ribosomal L38e protein family	0.00202589	0.00145509	0.00146947	0.000979676	0.000625562	0.000701434	0.000934862	0.00110478	0.000749187	0.00926187
Bra018700	mitochondrial lipoamide dehydrogenase 1	0.000612694	0.000678959	0.000571392	0.000666644	0.000532098	0.00066823	0.000911813	0.000801893	0.000866663	0.00953582
Bra010696	Ribosomal protein S25 family protein	0.0011505	0.00132806	0.00120707	0.00104317	0.000699413	0.00123238	0.000497727	0.000705833	0.000478647	0.00958878
Bra024346	annexin 2	4.91512e-06	4.53893e-06	4.58379e-06	0.000106958	6.82971e-05	3.82903e-06	0.000306197	0.00028144	0.000204485	0.0098615
Bra027521	HAD superfamily, subfamily IIIB acid phosphatase	0.000285511	0.000158195	0.000266264	8.28403e-05	3.96726e-06	4.44843e-06	0.000553356	0.000373676	0.000380102	0.0101242
Bra006954	monodehydroascorbate reductase 1	0.000536813	0.00062792	0.000634127	0.00101241	0.0012432	0.000864267	0.000941324	0.000731855	0.000952883	0.0102504
Bra005677	ferretin 1	5.62746e-06	5.19675e-06	5.24811e-06	0.00012246	0.000117293	4.38396e-06	0.000428478	0.000322228	0.000327769	0.0102872
Bra001972	cold, circadian rhythm, and RNA binding 1	9.4706e-06	8.74574e-06	8.83219e-06	0.000137394	6.57985e-06	7.37789e-06	0.000327772	0.000309878	0.000315207	0.0104608
Bra009790	Transducin/WD40 repeat-like superfamily protein	1.18112e-06	1.09072e-06	1.1015e-06	8.56751e-07	1.64121e-05	9.20133e-07	3.27024e-05	3.86464e-05	3.93109e-05	0.0105632
Bra011568	rotamase cyclophilin 5	0.00136244	0.00117428	0.00118589	0.00151535	0.00145141	0.00162745	0.00163464	0.00208035	0.00166267	0.0107237
Bra011422	lysine-ketoglutarate reductase/saccharopine dehydrogenase bifunctional enzyme	1.48487e-06	1.37123e-06	1.38478e-06	5.38541e-05	1.03164e-06	1.15676e-06	0.000226119	0.000170048	9.88411e-05	0.0110373
Bra002904	SHV3-like 1	0.000143433	0.000151377	0.000152874	0.000252674	0.000185069	0.000191553	9.92828e-05	0.00013409	0.000136395	0.0111318
Bra025749	dehydroascorbate reductase	0.000583354	0.000336691	0.000476026	0.00111076	0.00126654	0.000738482	0.00166563	0.000954366	0.00109212	0.0119997
Bra028411	alpha/beta-Hydrolases superfamily protein	4.22059e-06	7.79512e-05	3.93608e-06	3.06149e-06	2.93232e-06	3.28797e-06	0.000146072	0.000207147	7.02363e-05	0.012075
Bra007034	uracil phosphoribosyltransferase	5.33738e-06	4.92887e-06	4.97759e-06	0.000116147	0.000222494	0.00012474	7.38894e-05	4.36598e-06	4.44106e-06	0.012167
Bra003155	Ribosomal protein L36e family protein	1.38677e-05	0.000256125	0.000258657	1.00592e-05	9.63478e-06	1.08033e-05	0.000287971	0.000340312	0.000461553	0.0121675
Bra030906	aldehyde dehydrogenase 7B4	3.0817e-06	2.84584e-06	2.87397e-06	0.000223537	8.56425e-05	2.40074e-06	0.000575942	0.000378125	0.000435911	0.0124111
Bra016810	Glycine cleavage T-protein family	0.00148103	0.00161315	0.00155827	0.00201085	0.00184686	0.00183419	0.00218173	0.00177062	0.00202225	0.0124497
Bra037640	chloroplast chaperonin 10	0.00145261	0.00123825	0.00135469	0.00105368	0.00100923	0.00104458	0.000696102	0.00100543	0.000929746	0.0125049
Bra004475	ADP-ribosylation factor A1E	0.00197365	0.00190184	0.00184061	0.0029255	0.00339825	0.00260713	0.00320745	0.00308851	0.00228481	0.0125698
Bra009397	peroxisomal NAD-malate dehydrogenase 2	0.00138832	0.00152244	0.00186117	0.00191967	0.00220039	0.00196029	0.00141143	0.00149053	0.00137177	0.0125782
Bra033349	Protein of unknown function, DUF538	9.3565e-06	0.000172807	8.72577e-06	6.78691e-06	6.50057e-06	7.289e-06	0.000194294	0.000306145	0.000233557	0.0125902
Bra040977	photosystem II reaction center protein B	0.00210926	0.00224294	0.00226511	0.00180817	0.0018207	0.00169297	0.00196879	0.00240506	0.00236664	0.0126336
Bra006429	Cobalamin-independent synthase family protein	0.00231454	0.00269986	0.00206385	0.00322525	0.00400605	0.00319496	0.00292312	0.00292298	0.00295635	0.0126911
Bra007885	SPFH/Band 7/PHB domain-containing membrane-associated protein family	5.44975e-06	0.000201305	0.000101648	0.000197654	0.000302904	0.000212276	3.77225e-06	4.45789e-06	4.53455e-06	0.0128353
Bra016382	UDP-glucosyl transferase 85A2	3.23579e-06	2.98813e-06	3.01766e-06	0.000117357	0.000112406	2.52078e-06	0.000291171	0.000291156	0.000350011	0.0128384
Bra037536	presequence protease 1	0.000397548	0.00037978	0.000383534	0.000328144	0.000361921	0.00035242	0.000237222	0.000325194	0.000239535	0.0128522
Bra004031	alpha-xylosidase 1	5.04279e-05	7.76137e-05	4.70285e-05	9.75435e-05	5.83926e-05	5.23798e-05	0.000116352	0.00015125	0.00019581	0.0128642
Bra027376	Subtilase family protein	6.00456e-05	7.39331e-05	9.33298e-05	0.000159702	0.000139059	0.000171517	0.000110834	0.000114607	0.000183194	0.0129852
Bra001085	polyribonucleotide nucleotidyltransferase, putative	0.000185505	0.000218026	0.000188727	1.22327e-06	9.37325e-05	1.31376e-06	1.16731e-06	1.37948e-06	1.4032e-06	0.0131309
Bra026426	Aldolase superfamily protein	0.00216924	0.00188302	0.00218486	0.00176232	0.00168797	0.00145332	0.00147149	0.001597	0.00166056	0.0133365
Bra039844	nitrite reductase 1	0.000827137	0.000622379	0.00068567	0.000511093	0.000638518	0.000548904	0.000508919	0.000451065	0.000458821	0.0133516
Bra002485	aleurain-like protease	4.3264e-06	7.99054e-05	4.03476e-06	0.000219677	0.000270525	0.000235928	0.000329415	0.00017695	0.000323987	0.0134307
Bra039747	thioredoxin-dependent peroxidase 1	0.000575251	0.000442686	0.000447061	0.00104317	0.00119899	0.000672208	0.000995455	0.000862685	0.000797745	0.0134549
Bra006164	Protein of unknown function (DUF3411)	0.000328715	0.000265611	0.000344876	2.9805e-06	2.85475e-06	3.20099e-06	2.84416e-06	0.000168056	3.41891e-06	0.0135097
Bra014973	Nucleic acid-binding proteins superfamily	0.000121977	7.50943e-05	0.000151673	2.94929e-06	2.82486e-06	3.16747e-06	2.81437e-06	6.65183e-05	3.38311e-06	0.0137799
Bra040651	Cystatin/monellin superfamily protein	0.00069963	0.000646082	0.000652468	0.000405992	0.000194432	0.00032702	0.000484275	0.000572297	0.000698566	0.0138781
Bra000737	vacuolar ATP synthase subunit E1	0.000720733	0.000665569	0.000705755	0.000653496	0.000575851	0.000645694	0.000723379	0.000825383	0.000869561	0.0145053
Bra020587	seryl-tRNA synthetase / serine--tRNA ligase	0.000137754	0.000190816	0.000224819	0.000299768	0.000478534	0.000348773	0.000262217	0.000253537	0.000229241	0.0147328
Bra024089	xyloglucan endotransglucosylase/hydrolase 24	0.000723703	0.000514087	0.000882585	0.000403809	0.000386772	0.000390314	0.000539472	0.000500914	0.000509528	0.014733
Bra002710	xylose isomerase family protein	3.25614e-06	3.00692e-06	3.03664e-06	4.72381e-05	6.78676e-05	2.53663e-06	0.000112693	0.000133176	0.000108373	0.0151438
Bra014002	S-adenosyl-L-homocysteine hydrolase	0.00133222	0.00129027	0.00093939	0.00164987	0.00187374	0.00164536	0.00179932	0.00162135	0.00164923	0.0151936
Bra029879	manganese superoxide dismutase 1	0.000605135	0.00062091	0.000564342	0.000780348	0.000980995	0.000785698	0.00065157	0.00066	0.000783241	0.0151978
Bra008402	proteasome subunit PAB1	0.000198278	0.000183102	0.000308187	0.000479416	0.000459189	0.000360418	0.00032024	0.000378447	0.000384954	0.0152012
Bra040870	Senescence/dehydration-associated protein-related	3.4211e-06	3.15925e-06	3.19048e-06	0.000248156	7.13058e-05	2.66514e-06	0.000355206	0.000335815	0.000398521	0.0152658
Bra040427	ribosome recycling factor, chloroplast precursor	0.000407391	0.000517289	0.000759858	0.000480202	0.000495322	0.000515727	0.000211493	0.000249934	0.000338976	0.0153454
Bra000097	histone H2A 11	0.000347727	0.00042815	0.000324286	0.000336307	0.000241588	0.000361186	0.000240692	0.000189627	0.000192888	0.0154447
Bra004055	hydroxypyruvate reductase	0.00177046	0.00219233	0.00232657	0.00207229	0.00206873	0.00238233	0.00169898	0.00144824	0.00130574	0.0155919
Bra016184	phosphoglucomutase, putative / glucose phosphomutase, putative	2.53373e-06	7.01942e-05	2.36293e-06	7.35157e-05	0.000105621	9.86928e-05	1.75382e-06	2.07259e-06	2.10823e-06	0.0157028
Bra019845	aconitase 3	0.000266438	0.000260519	0.000248478	0.000329689	0.000272224	0.000305241	0.000412245	0.000410252	0.00031298	0.0157556
Bra025219	glyceraldehyde 3-phosphate dehydrogenase A subunit	0.00482303	0.00468035	0.00499344	0.00397284	0.0041176	0.00433043	0.00415891	0.00464735	0.0044552	0.0157585
Bra030537	photosystem II family protein	0.000270903	0.000333559	0.000336855	0.000196505	6.27381e-06	7.03473e-06	6.25053e-06	7.38663e-06	7.51365e-06	0.015881
Bra013997	glycine-rich RNA-binding protein 2	0.000214232	0.000296752	0.00019979	0.000233095	0.000297681	0.00025034	0.000370721	0.000438103	0.00035651	0.0161804
Bra039757	O-Glycosyl hydrolases family 17 protein	9.2268e-05	8.5206e-05	2.86827e-06	0.000133857	0.000128209	9.58396e-05	2.12889e-06	2.51584e-06	2.5591e-06	0.0163552
Bra000311	Chitinase family protein	5.79544e-06	5.35187e-06	5.40477e-06	0.000126115	0.000241588	9.02966e-05	8.02307e-05	4.74067e-06	4.82219e-06	0.0164093
Bra023165	myo-inositol monophosphatase like 1	0.000125933	0.000193825	0.00019574	0.000243595	0.000291647	0.000359722	8.71696e-05	0.000171689	0.000104785	0.0164426
Bra014179	RAB GTPase homolog G3E	0.000517726	0.000478101	0.000413851	0.000375543	0.000411084	0.000403325	0.000665533	0.0006655	0.000492323	0.0165867
Bra013210	AMP-dependent synthetase and ligase family protein	2.1542e-06	1.98932e-06	2.00899e-06	7.81295e-05	1.49666e-06	6.71276e-05	0.000149111	0.000158592	0.000215092	0.016757
Bra013859	acyl carrier protein 4	0.000366893	0.000564686	1.14053e-05	0.000620976	0.000509809	0.000762189	8.46528e-06	1.00039e-05	1.0176e-05	0.016885
Bra016010	basic transcription factor 3	9.3565e-06	0.000172807	8.72577e-06	0.000135738	0.000260023	0.00029156	6.47645e-06	7.65361e-06	7.78522e-06	0.017031
Bra037484	Lactoylglutathione lyase / glyoxalase I family protein	0.000282396	8.69274e-06	8.77866e-06	6.82805e-06	6.53997e-06	7.33318e-06	0.000390942	0.000308	0.000313296	0.0172564
Bra034394	copper/zinc superoxide dismutase 2	0.000150066	0.00013858	6.99748e-06	0.000326559	0.000208521	0.000116906	5.19368e-06	6.13768e-06	6.24322e-06	0.0172913
Bra017940	DPP6 N-terminal domain-like protein	0.000110155	6.10341e-05	0.000102729	0.000159805	0.000244901	0.000205953	0.000137246	0.000108128	0.000146649	0.0173274
Bra004639	NADPH-dependent thioredoxin reductase C	0.000238492	0.000275298	0.000305821	0.000129746	0.000186408	0.000185793	0.000144446	0.000146315	0.000198441	0.0173886
Bra037380	unknown protein;	0.00230101	0.00256758	0.00178825	0.00132135	0.00106577	0.0014938	0.00152636	0.00149009	0.00183481	0.0174394
Bra036321	Cysteine proteinases superfamily protein	4.33849e-06	4.00643e-06	4.04603e-06	3.147e-06	0.000120569	3.37982e-06	0.000150152	0.000212933	0.000324892	0.0174531
Bra004627	S-formylglutathione hydrolase	5.48826e-06	5.0682e-06	5.1183e-06	3.98102e-06	3.81306e-06	0.000171021	0.000341902	0.000269364	0.000319662	0.0175337
Bra006963	Thioredoxin superfamily protein	0.00205305	0.00247293	0.0019979	0.00129497	0.00142639	0.0012517	0.0014211	0.00197147	0.00215391	0.017665
Bra033708	translocase of outer membrane 22-V	1.60122e-05	1.47866e-05	1.49328e-05	0.000232294	1.11247e-05	1.2474e-05	0.000332502	0.000392938	0.000399695	0.0178186
Bra027469	thioredoxin 3	0.00252549	0.00256542	0.00141315	0.00375543	0.00386018	0.00226255	0.00515694	0.00464817	0.00577879	0.0178443
Bra012899	methyl esterase 10	0.000118563	5.47443e-06	5.52854e-06	4.30011e-06	4.11868e-06	4.61822e-06	0.000164136	0.000145477	9.86524e-05	0.018301
Bra014955	uricase / urate oxidase / nodulin 35, putative	5.10914e-06	4.7181e-06	4.76473e-06	3.70601e-06	0.00010649	3.98018e-06	0.000176824	0.000250757	0.000127534	0.0183799
Bra006975	glutamate-ammonia ligases;catalytics;glutamate-ammonia ligases	1.83374e-06	1.69339e-06	1.71013e-06	3.99042e-05	2.54804e-05	1.42854e-06	5.07717e-05	6e-05	6.10317e-05	0.0183872
Bra039540	pyruvate orthophosphate dikinase	1.77506e-06	1.6392e-06	1.6554e-06	2.57515e-05	1.23325e-06	5.53131e-05	8.60073e-05	8.712e-05	7.38484e-05	0.0183945
Bra015047	Heat shock protein 70 (Hsp 70) family protein	2.3321e-06	0.00135677	0.000978702	1.69163e-06	1.62026e-06	1.81678e-06	0.00138826	0.00167874	0.00149416	0.0186194
Bra010167	Single hybrid motif superfamily protein	0.000467825	0.000432019	0.000261773	0.000271477	0.000195017	0.00021867	0.000582881	0.000612289	0.000389261	0.0187098
Bra008737	formate dehydrogenase	4.04474e-06	7.47032e-05	3.77208e-06	0.000146696	0.000168609	6.30195e-05	0.000279972	0.000231602	0.000471168	0.0188423
Bra032344	carbamoyl phosphate synthetase B	0.000211317	0.000256125	0.000184755	0.000201184	0.000192696	0.000288089	7.31355e-05	0.00015125	9.89041e-05	0.0191175
Bra025431	Ribulose bisphosphate carboxylase (small chain) family protein	0.0104689	0.00982615	0.00960317	0.00896323	0.00858506	0.00795508	0.00754346	0.00877417	0.00714004	0.0191495
Bra007417	citrate synthase 2	3.06347e-06	2.829e-06	2.85696e-06	8.88858e-05	2.12839e-06	4.77307e-05	0.000148435	0.000100237	0.000178431	0.0191763
Bra004531	cellular apoptosis susceptibility protein, putative / importin-alpha re-exporter, putative	4.7987e-05	2.95428e-05	2.98348e-05	3.48083e-05	3.33397e-05	3.73833e-05	5.536e-05	6.54222e-05	5.32378e-05	0.0193053
Bra004214	Glyoxalase/Bleomycin resistance protein/Dioxygenase superfamily protein	0.000501025	0.000546801	0.000637161	0.000528623	0.000474675	0.00056773	0.00066208	0.000707903	0.000720076	0.0193868
Bra016261	SPFH/Band 7/PHB domain-containing membrane-associated protein family	0.000217228	5.01504e-06	5.06461e-06	3.93926e-06	3.77306e-06	4.23068e-06	0.000225544	0.000222115	0.000271122	0.0194375
Bra000592	Leucine-rich repeat protein kinase family protein	1.88036e-06	1.73644e-06	1.75361e-06	4.09187e-05	3.91923e-05	5.85944e-05	2.60313e-05	1.53814e-06	3.12917e-05	0.0194981
Bra004781	O-acetylserine (thiol) lyase B	0.00172575	0.00137635	0.00168258	0.00167856	0.00196199	0.00177218	0.00119455	0.000994583	0.00140331	0.0200204
Bra027017	unknown protein;	0.000329063	0.000303877	0.000245505	0.000190954	0.000228622	0.000307621	4.55547e-06	0.000107669	5.47605e-06	0.0200227
Bra011722	methyl esterase 9	6.0435e-06	5.58094e-06	5.6361e-06	0.000263026	0.000251929	4.70807e-06	0.000627485	0.000346051	0.000452573	0.0202155
Bra003537	D-isomer specific 2-hydroxyacid dehydrogenase family protein	4.96223e-06	4.58243e-06	4.62773e-06	3.59945e-06	6.89518e-05	3.86573e-06	0.000103044	0.000121773	8.25781e-05	0.0202512
Bra031652	amidase 1	3.68926e-06	3.40689e-06	3.44057e-06	8.02823e-05	5.12634e-05	8.62214e-05	5.10732e-05	3.01781e-06	3.06971e-06	0.0204169
Bra006794	Ubiquitin-like superfamily protein	0.000334017	1.54226e-05	1.5575e-05	1.21143e-05	1.16032e-05	1.30105e-05	0.000346804	0.000409839	0.000277924	0.0204276
Bra041132	Kunitz family trypsin and protease inhibitor protein	0.000139926	6.46082e-06	6.52468e-06	5.0749e-06	4.86079e-06	5.45033e-06	0.000145283	0.000114459	0.000174641	0.0205243
Bra021327	thylakoid lumen 18.3 kDa protein	0.00202351	0.00151511	0.00229512	0.0015868	0.00159584	0.00140596	0.00234703	0.0022368	0.00250278	0.0205575
Bra025066	Proteasome component (PCI) domain protein	4.02378e-06	3.71581e-06	3.75254e-06	5.83745e-05	2.79558e-06	3.13465e-06	8.35563e-05	6.5829e-05	0.000133922	0.0206056
Bra009040	RAB GTPase homolog A4A	0.000487545	0.000192955	6.49542e-06	5.05214e-06	4.83899e-06	5.42589e-06	0.000337473	0.000398812	0.000289764	0.0207324
Bra028628	mitochondrial HSO70 2	2.28409e-06	2.10927e-06	2.13012e-06	0.000215385	1.5869e-06	1.77937e-06	0.000268773	0.000485779	0.000342092	0.0209401
Bra016163	Cupredoxin superfamily protein	2.88159e-06	2.66104e-06	2.68734e-06	2.09022e-06	4.00406e-05	2.24485e-06	0.000119676	4.71428e-05	4.79535e-05	0.0209592
Bra036452	CLIP-associated protein	1.0801e-06	9.97428e-07	1.00729e-06	3.13387e-05	4.50248e-05	4.20714e-05	7.47629e-07	2.65056e-05	8.98711e-07	0.0209722
Bra021477	Insulinase (Peptidase family M16) protein	0.000176832	0.00029938	0.000219883	0.000384806	0.000470952	0.000505113	0.000673207	0.00038573	0.000392363	0.0210905
Bra016269	senescence associated gene 24	0.000783115	0.000723177	1.21721e-05	9.46746e-06	9.06802e-06	1.01679e-05	0.000813094	0.000640588	0.000760204	0.0213811
Bra009998	unknown protein;	0.0001769	0.000196032	0.000164975	0.000179644	0.000294969	0.000303183	0.000146937	5.78815e-05	8.83153e-05	0.0215187
Bra013145	ARM repeat superfamily protein	1.83808e-06	6.78959e-05	3.42835e-05	1.33329e-06	1.27704e-06	1.43192e-06	5.08919e-05	6.0142e-05	3.05881e-05	0.0217599
Bra040749	Granulin repeat cysteine protease family protein	0.000509796	0.000596318	0.000697298	0.000517706	0.000495864	0.0004501	0.000752799	0.00063942	0.000876647	0.0220549
Bra020134	TCP-1/cpn60 chaperonin family protein	0.000398251	2.829e-06	2.85696e-06	0.000444429	0.000383111	0.000477307	2.1205e-06	2.50592e-06	2.54901e-06	0.0221606
Bra023645	Cobalamin-independent synthase family protein	0.00247696	0.00271861	0.00208278	0.00323997	0.00414711	0.00316333	0.00299339	0.00305584	0.00305771	0.0222592
Bra022449	eukaryotic initiation factor 4A-III	3.80681e-06	3.51545e-06	3.55019e-06	2.76134e-06	0.000185139	2.96562e-06	0.000289853	0.000217978	0.000285077	0.0227711
Bra007856	DNA repair ATPase-related	3.39864e-06	3.13852e-06	3.16954e-06	4.93054e-05	4.72252e-05	2.64765e-06	4.70499e-05	8.34026e-05	0.000141395	0.0228235
Bra024440	ADP-ribosylation factor-like A1D	8.44119e-06	7.79512e-06	7.87217e-06	0.000244919	0.000234586	0.000526076	5.84289e-06	6.90489e-06	0.000210709	0.0229427
Bra021847	Caleosin-related family protein	6.49866e-06	6.00126e-06	0.000121212	0.000188557	0.000180602	0.00015188	0.00031488	0.000372113	0.000324439	0.0230049
Bra011172	H(+)-ATPase 2	0.000851955	0.00101369	0.0008862	0.000522907	0.00055776	0.000765807	0.0007258	0.000750506	0.000736147	0.0230184
Bra006103	aspartate aminotransferase 3	3.43624e-06	3.17323e-06	3.2046e-06	0.000174478	2.38738e-06	2.67693e-06	0.000428134	0.000252976	0.00017155	0.0230314
Bra016405	PDI-like 1-1	0.000279014	0.000257659	0.00017347	0.000247363	0.000301543	0.000338117	0.000557932	0.000405748	0.00038693	0.0231271
Bra020813	Tyrosine transaminase family protein	0.000892631	0.000692421	0.00059937	0.00124318	0.00148841	0.00100136	0.00126045	0.00102224	0.00151517	0.0232336
Bra034363	60S acidic ribosomal protein family	0.00178684	0.00228473	0.00115366	0.00179463	0.00181441	0.00149908	0.000951408	0.0010119	0.000686202	0.0233829
Bra020793	long-chain acyl-CoA synthetase 6	2.46928e-06	2.28029e-06	2.30283e-06	7.16456e-05	1.71557e-06	3.8473e-05	0.000119644	0.000121192	6.16382e-05	0.0234118
Bra028271	2 iron, 2 sulfur cluster binding	1.43813e-05	1.32806e-05	1.34118e-05	0.000208635	9.99162e-06	1.12035e-05	0.000199091	0.000352917	0.000358985	0.0234794
Bra004970	Eukaryotic translation initiation factor 2 subunit 1	4.54146e-06	4.19386e-06	4.23532e-06	6.58847e-05	3.15525e-06	3.53794e-06	6.28708e-05	0.000111447	0.000113364	0.0234794
Bra028615	actin 7	0.00193632	0.00209248	0.00161369	0.00227119	0.00243297	0.00240711	0.00222433	0.00232532	0.0023653	0.0235282
Bra008533	unknown protein;	0.00192999	0.00220662	0.00162847	0.00113329	0.00114933	0.00136033	0.00133591	0.00127802	0.00175882	0.0235649
Bra040547	CONTAINS InterPro DOMAIN/s: Mediator complex subunit Med28 (InterPro:IPR021640); BEST Arabidopsis thaliana protein match is: unknown protein (TAIR:AT3G01670.1); Has 122 Blast hits to 112 proteins in 13 species: Archae - 0; Bacteria - 0; Metazoa - 0; Fungi - 0; Plants - 122; Viruses - 0; Other Eukaryotes - 0 (source: NCBI BLink).	0.000147121	7.76347e-05	0.000117603	0.000167698	0.000175225	0.000163731	0.000232767	0.000189114	0.000192366	0.0237795
Bra015995	sucrose synthase 6	4.94118e-05	3.042e-05	1.53603e-06	1.19473e-06	1.14432e-06	1.28311e-06	2.28015e-05	4.04189e-05	5.48185e-05	0.0237821
Bra030494	Late embryogenesis abundant protein	1.0286e-05	9.49869e-06	9.59257e-06	0.000820722	7.14632e-06	8.01307e-06	0.00121037	0.00134622	0.000941445	0.0237985
Bra020470	vegetative storage protein 2	0.000231818	0.000160556	0.000108095	0.000630575	0.000805295	0.000316038	0.000842422	0.000331847	0.000530441	0.0238895
Bra011079	regulatory particle AAA-ATPase 2A	0.000140242	0.000259016	0.000130788	0.000406908	0.000292306	0.000409698	0.000364026	0.000372833	0.000262554	0.0243089
Bra022356	actin 2	0.00144258	0.00150979	0.00134534	0.00160449	0.00170383	0.00172318	0.00156437	0.00173071	0.00184049	0.0243715
Bra019788	Nucleic acid-binding, OB-fold-like protein	8.51057e-05	5.89439e-05	3.96843e-05	1.54333e-06	1.47821e-06	1.6575e-06	1.47273e-06	5.22123e-05	1.77034e-06	0.0244744
Bra021555	Aldolase-type TIM barrel family protein	0.00344654	0.00334808	0.0035064	3.24677e-06	3.10978e-06	3.48696e-06	3.09825e-06	3.66138e-06	0.00301672	0.0244777
Bra038946	purple acid phosphatase 26	3.23579e-06	2.98813e-06	3.01766e-06	2.34714e-06	4.49623e-05	2.52078e-06	6.71932e-05	5.29375e-05	5.38478e-05	0.0245885
Bra016041	cinnamyl-alcohol dehydrogenase	4.38751e-06	4.0517e-06	4.09175e-06	3.18256e-06	6.09658e-05	3.41801e-06	9.11094e-05	7.17796e-05	7.3014e-05	0.0245885
Bra015025	beta-amylase 1	2.72488e-06	2.51632e-06	2.54119e-06	7.90616e-05	3.7863e-05	8.49105e-05	1.88612e-06	2.22895e-06	4.53455e-05	0.0245987
Bra029730	Rhodanese/Cell cycle control phosphatase superfamily protein	0.000320243	0.000443598	1.49328e-05	1.16147e-05	1.11247e-05	1.2474e-05	0.000554171	0.000261959	0.000266463	0.0246296
Bra020105	Myosin family protein with Dil domain	3.05143e-05	3.75718e-05	1.89716e-05	7.37805e-07	1.41335e-05	7.92387e-07	2.81622e-05	3.32809e-05	3.38532e-05	0.0246375
Bra014466	SEC7-like guanine nucleotide exchange family protein	8.77998e-07	1.6216e-05	8.18812e-07	6.36873e-07	6.10003e-07	6.83988e-07	1.21548e-05	1.4364e-05	1.4611e-05	0.0248674
Bra030569	Lactate/malate dehydrogenase family protein	0.0015906	0.00172807	0.00148338	0.00210394	0.00195017	0.00182225	0.00184579	0.00198994	0.00221879	0.0248792
Bra007179	delta 1-pyrroline-5-carboxylate synthase 2	2.13642e-06	1.9729e-06	1.99241e-06	0.000340933	0.000296862	1.66434e-06	0.000428853	0.000436898	0.00049774	0.0250032
Bra035087	photosystem II subunit R	0.00199694	0.00194655	0.00186233	0.0012071	0.00154156	0.00138283	0.00161264	0.00154275	0.00203083	0.0250858
Bra002922	microtubule-associated proteins 65-1	7.96502e-05	9.80719e-05	4.95206e-05	1.92586e-06	5.53382e-05	6.205e-05	1.83776e-06	2.17179e-06	2.20914e-06	0.0252023
Bra025480	6-phosphogluconate dehydrogenase family protein	0.000255142	2.94518e-06	2.97429e-06	0.000277608	0.000155106	0.000372682	2.20758e-06	2.60883e-06	2.65369e-06	0.0252892
Bra029574	root FNR 1	4.10894e-06	3.79445e-06	7.66391e-05	2.9805e-06	2.85475e-06	3.20099e-06	5.68831e-05	6.72222e-05	6.83782e-05	0.0254032
Bra006584	TCP-1/cpn60 chaperonin family protein	2.07644e-06	0.000441029	0.00029047	1.50619e-06	1.44264e-06	1.61761e-06	0.000244339	0.000356691	0.000224606	0.0255222
Bra014005	Inositol monophosphatase family protein	0.000829591	0.000808657	0.000730686	0.000735484	0.000672433	0.000610373	0.000574233	0.000490104	0.000651926	0.0256102
Bra011081	Class II aminoacyl-tRNA and biotin synthetases superfamily protein	0.000596701	0.000567238	0.000343707	0.00024824	0.000304829	0.000362309	0.000109331	0.000258407	0.000197138	0.0256571
Bra037761	photosystem I reaction center subunit PSI-N, chloroplast, putative / PSI-N, putative (PSAN)	0.00425275	0.0037565	0.00327632	0.00254832	0.00269774	0.00201662	0.00262373	0.00325187	0.00346164	0.0256706
Bra017143	Neutral/alkaline non-lysosomal ceramidase	2.07091e-06	1.9124e-06	1.9313e-06	3.00434e-05	2.87759e-05	1.6133e-06	5.73382e-05	3.388e-05	3.44626e-05	0.0257984
Bra036365	Thioredoxin superfamily protein	0.00230101	0.00192568	0.00241413	0.00250362	0.00319732	0.00263281	0.00199091	0.00158812	0.00203425	0.0259192
Bra016931	Embryo-specific protein 3, (ATS3)	8.48732e-06	7.83771e-06	7.91518e-06	0.000123129	0.000176901	6.61188e-06	0.000176244	0.000208279	0.00021186	0.0259304
Bra028568	Eukaryotic aspartyl protease family protein	3.25614e-06	3.00692e-06	3.03664e-06	7.08571e-05	2.26225e-06	2.53663e-06	0.000112693	7.99056e-05	8.12797e-05	0.0260268
Bra006248	Ribosomal protein S13/S18 family	0.00101094	0.00110331	0.000857088	0.000599979	0.000702369	0.000787557	0.000508919	0.000751775	0.000458821	0.0260291
Bra001123	pathogenesis-related 4	7.25784e-06	6.70234e-06	6.76859e-06	5.26462e-06	0.000151275	5.65409e-06	0.000200952	0.000178107	0.00018117	0.0260511
Bra002617	LOCATED IN: thylakoid, chloroplast thylakoid membrane, chloroplast, chloroplast envelope; EXPRESSED IN: 22 plant structures; EXPRESSED DURING: 13 growth stages; CONTAINS InterPro DOMAIN/s: Thylakoid soluble phosphoprotein TSP9 (InterPro:IPR021584); Has 37 Blast hits to 37 proteins in 10 species: Archae - 0; Bacteria - 0; Metazoa - 0; Fungi - 0; Plants - 37; Viruses - 0; Other Eukaryotes - 0 (sour…	1.5378e-05	0.00085206	1.43414e-05	0.000892378	0.000641046	0.000718797	1.06445e-05	1.25792e-05	1.27955e-05	0.0261771
Bra029928	ribosomal protein S11-beta	0.000683789	0.000631454	0.000637695	7.08571e-06	6.78676e-06	7.6099e-06	6.76158e-06	0.000878962	0.000325119	0.0263636
Bra015274	FASCICLIN-like arabinoogalactan 9	6.21272e-06	5.73721e-06	5.79391e-06	0.00018026	0.000215819	0.000193596	0.000172015	5.082e-06	5.16939e-06	0.0264647
Bra040448	Ribosomal protein L1p/L10e family	0.000962146	0.00105774	0.000598192	0.000830846	0.000795793	0.000928004	0.00044399	0.000599646	0.000419346	0.0265306
Bra000667	isoamylase 3	8.62877e-05	5.97626e-05	4.02355e-05	0.000109533	0.000119899	0.000151247	8.95909e-05	0.000123521	0.000107696	0.0266576
Bra013632	HSP70-interacting protein 1	0.000114204	3.51545e-06	3.55019e-06	8.28403e-05	0.00015869	8.89687e-05	2.63503e-06	3.11397e-06	3.16752e-06	0.0266981
Bra013517	photosystem II subunit QA	0.00177897	0.00227466	0.00312667	0.0038216	0.00351775	0.00287835	0.00156291	0.00184698	0.00210647	0.0267636
Bra006775	regulatory particle triple-A ATPase 3	0.00011917	3.66829e-06	3.70455e-06	0.00028814	0.000220787	0.000247565	0.000302455	0.000259949	0.000231366	0.026779
Bra011099	profilin 1	0.00106707	0.000875909	0.00110571	0.000774019	0.000494242	0.000738916	0.000984816	0.00116382	0.000986524	0.0268947
Bra030114	unknown protein;	8.30577e-06	7.67006e-06	7.74587e-06	0.000120495	5.77056e-06	6.47045e-06	0.000172475	0.000135882	0.000138219	0.026997
Bra008463	isopropylmalate dehydrogenase 2	0.000573835	0.000565242	0.000535152	0.000776985	0.00116946	0.000864267	0.000662002	0.00040681	0.000604793	0.0270814
Bra010320	Alkaline-phosphatase-like family protein	3.4592e-06	3.19444e-06	3.22601e-06	0.000100368	9.61332e-05	8.08446e-05	9.57765e-05	2.82962e-06	5.75656e-05	0.0272432
Bra021277	receptor-like kinase 902	7.37268e-05	9.07786e-05	4.58379e-05	3.56528e-05	1.70743e-06	7.65807e-05	1.70109e-06	2.01028e-06	2.04485e-06	0.0274951
Bra000853	GTP binding Elongation factor Tu family protein	0.000445725	0.000348285	0.000319752	0.000447667	0.000500243	0.000454074	0.000545852	0.000476788	0.00062763	0.0280197
Bra007317	eukaryotic translation initiation factor 3E	0.000140878	0.000162619	0.000131381	0.000229924	0.000293631	0.000192059	0.000243785	0.000230476	0.00017583	0.0280468
Bra000144	rubisco activase	0.00912288	0.0086662	0.0108865	0.00761363	0.00717882	0.00960338	0.00554521	0.0071148	0.00650255	0.0280893
Bra021175	nitrile specifier protein 1	5.99683e-06	5.53784e-06	5.59258e-06	8.69983e-05	4.16639e-06	4.67172e-06	8.30186e-05	0.000147162	9.97951e-05	0.0282941
Bra033851	Protein of unknown function (DUF760)	0.000116198	0.000107304	0.000144487	2.80955e-06	2.69101e-06	6.03478e-05	0.000107241	0.000126733	9.66843e-05	0.0283996
Bra002483	GTP binding Elongation factor Tu family protein	0.00359756	0.00389721	0.00306471	0.00353796	0.00365306	0.00334158	0.00399867	0.00483865	0.00474916	0.0285358
Bra040080	serine hydroxymethyltransferase 3	8.8082e-05	2.71135e-06	8.21443e-05	4.25946e-05	8.15951e-05	0.000114364	2.03231e-06	2.4017e-06	2.443e-06	0.0286497
Bra002878	FASCICLIN-like arabinogalactan 1	0.000145838	0.000303021	0.000136007	0.00031736	0.00027864	0.00045445	0.000100948	0.00014912	0.000151684	0.0289001
Bra034975	aldehyde oxidase 2	1.24854e-06	1.15298e-06	1.16437e-06	9.05649e-07	3.46976e-05	9.72648e-07	5.18533e-05	4.08521e-05	3.11659e-05	0.0289139
Bra018565	chloroplast RNA binding	0.00332824	0.00337706	0.00272069	0.00306991	0.00294039	0.00332903	0.00224688	0.00245361	0.00266675	0.0292054
Bra000895	secretion-associated RAS super family 2	8.04756e-06	0.000594529	7.50507e-06	0.00145936	0.0014537	0.00106578	0.00139261	0.0015799	0.00160706	0.0293867
Bra018338	ubiquitin-activating enzyme 1	0.000183224	0.000169201	0.000144585	0.000214693	0.000225219	0.000164697	0.000224384	0.00024211	0.000281455	0.0295729
Bra011843	alanine:glyoxylate aminotransferase 2	3.26298e-06	3.01324e-06	3.04302e-06	2.36686e-06	2.26701e-06	0.000101679	0.000180688	8.00735e-05	0.000135751	0.0296072
Bra017730	phospholipase D delta	5.55368e-05	6.83815e-05	6.90574e-05	6.71411e-05	2.57234e-05	0.000129795	0.000230651	0.000212002	0.000200244	0.0296922
Bra000687	ATP synthase delta-subunit gene	0.00252226	0.00275827	0.00278554	0.00361099	0.00373533	0.00279225	0.00238909	0.0021175	0.00265097	0.0297076
Bra037976	Dihydrolipoamide acetyltransferase, long form protein	2.87094e-06	2.6512e-06	2.67741e-06	2.08249e-06	7.97852e-05	2.23655e-06	5.96169e-05	9.39371e-05	0.000167217	0.0297452
Bra027184	Isochorismatase family protein	7.92438e-06	7.31787e-06	0.000221706	5.7481e-06	5.50559e-06	6.17334e-06	0.000109703	0.000194464	0.000263744	0.029782
Bra023623	phosphoglucosamine mutase family protein	5.49798e-05	5.07717e-05	5.12736e-05	9.97016e-05	0.000171891	0.000128493	0.000171253	6.74602e-05	9.14936e-05	0.0302176
Bra040903	TRAF-like family protein	0.000325273	0.000225283	0.000151673	0.000589857	0.000338983	0.000411771	0.000478444	0.000432369	0.000575128	0.0302306
Bra013983	Thiamine pyrophosphate dependent pyruvate decarboxylase family protein	0.000162353	7.49635e-05	0.000100939	0.000235532	0.000225595	0.000189717	0.000187298	0.000154939	0.000180118	0.0302833
Bra038377	ATP synthase delta-subunit gene	0.00245588	0.00220662	0.00229033	0.00250362	0.00281303	0.00232687	0.00174587	0.00184603	0.00220914	0.0303654
Bra015656	nitrate reductase 1	3.49029e-05	6.4463e-05	8.13752e-05	1.26587e-06	1.21247e-06	5.43809e-05	1.20797e-06	1.42753e-06	1.45208e-06	0.0304751
Bra009349	unknown protein;	0.00013275	0.000204316	8.25344e-05	9.6293e-05	3.07434e-06	0.000137889	3.06294e-06	3.61966e-06	3.6819e-06	0.0306358
Bra004771	chitinase, putative	5.50773e-06	5.08618e-06	5.13645e-06	0.000279659	0.000918379	4.29069e-06	0.0008006	0.000405479	0.00087073	0.0306813
Bra023485	carbonic anhydrase 2	0.00533718	0.00520557	0.00581628	0.0050024	0.00604126	0.00513889	0.00427546	0.00441486	0.00474027	0.0307134
Bra022221	Late embryogenesis abundant protein (LEA) family protein	5.21201e-06	4.81309e-06	4.86067e-06	0.000226838	3.62112e-06	4.06032e-06	0.000396846	0.000255805	0.000173469	0.0308475
Bra008643	Ribosomal protein S7e family protein	0.000980955	0.000528427	7.62357e-06	0.00047437	0.000454356	0.000573146	5.65837e-06	6.68684e-06	6.80183e-06	0.0309617
Bra013540	oxidoreductase, zinc-binding dehydrogenase family protein	4.77901e-06	4.41324e-06	4.45686e-06	3.46655e-06	0.000132812	3.723e-06	0.000132319	0.000117277	0.000198823	0.0314104
Bra020043	Translation elongation factor EF1B/ribosomal protein S6 family protein	0.000483211	0.000446227	0.000257507	0.000250362	0.000287759	0.000376436	4.77818e-06	0.0001694	5.74376e-06	0.0314278
Bra018329	catalytics;transferases;[acyl-carrier-protein] S-malonyltransferases;binding	0.000566263	0.000634977	0.000414929	0.000352071	0.000337217	0.000409627	0.000279972	0.000397031	0.000302894	0.0314764
Bra031804	unknown protein;	7.61362e-06	7.03089e-06	7.10038e-06	0.000220907	0.000105794	5.93125e-06	0.000421604	0.000186838	0.000126701	0.0317664
Bra039681	glyoxalase II 3	6.36549e-06	5.87829e-06	5.93639e-06	0.000323213	4.42252e-06	4.95891e-06	0.00039655	0.000312418	0.00031779	0.0319345
Bra007610	Tyrosine transaminase family protein	0.000541475	0.000500032	0.000425241	0.000806211	0.000970195	0.000666041	0.00088769	0.000629422	0.0011145	0.0319687
Bra033856	pinoresinol reductase 1	4.89962e-06	4.52461e-06	4.56933e-06	0.000106621	3.40408e-06	3.81695e-06	0.000135658	8.01577e-05	0.000163072	0.031977
Bra037892	Molybdenum cofactor sulfurase family protein	9.92446e-05	9.16487e-05	0.000138832	3.59945e-06	3.44759e-06	3.86573e-06	3.4348e-06	4.0591e-06	0.000123867	0.0322134
Bra011689	alpha/beta-Hydrolases superfamily protein	4.16402e-06	0.000153813	0.000155333	9.06135e-05	8.67905e-05	9.7317e-05	2.88228e-06	3.40617e-06	3.46474e-06	0.032286
Bra014468	N-terminal nucleophile aminohydrolases (Ntn hydrolases) superfamily protein	6.96493e-06	6.43185e-06	6.49542e-06	0.000505214	0.000435509	0.000325554	0.000433893	5.69731e-06	0.000405669	0.0324933
Bra010574	aminopeptidase P1	2.42684e-06	2.2411e-06	2.26325e-06	1.76036e-06	0.000118026	1.89058e-06	0.00010079	0.000138961	0.000121158	0.0329736
Bra019940	Glutathione S-transferase family protein	6.8422e-06	6.31851e-06	6.38096e-06	9.92623e-05	9.50744e-05	5.33028e-06	9.47217e-05	0.000111938	0.000113863	0.0330346
Bra039059	Peroxidase superfamily protein	4.76435e-06	4.3997e-06	4.44319e-06	6.91183e-05	3.31011e-06	3.71158e-06	6.59565e-05	7.79448e-05	7.92851e-05	0.0331512
Bra015164	unknown protein;	1.25256e-05	1.15669e-05	1.16813e-05	0.000181714	8.70238e-06	9.75786e-06	0.000173402	0.000204919	0.000208443	0.0331512
Bra015779	Dehydrin family protein	7.96502e-06	7.35539e-06	7.42809e-06	0.00040443	0.000332029	0.00043435	5.51329e-06	0.000390923	6.62742e-06	0.0333985
Bra016372	RAB GTPase homolog G3B	4.45037e-06	4.10975e-06	4.15037e-06	0.000161408	3.09196e-06	0.000104009	0.000215634	0.00018202	0.00011109	0.0335162
Bra005347	Single hybrid motif superfamily protein	0.000280695	0.000172807	0.000174515	6.78691e-06	6.50057e-06	7.289e-06	0.000259058	7.65361e-06	7.78522e-06	0.0336553
Bra029906	chlorsulfuron/imidazolinone resistant 1	0.000119109	0.000131991	4.44319e-05	1.72796e-06	4.96516e-05	0.000129905	1.64891e-06	1.94862e-06	1.98213e-06	0.0338703
Bra028243	HIS HF	2.65501e-06	2.4518e-06	2.47603e-06	5.77758e-05	5.53382e-05	6.205e-05	5.51329e-05	2.17179e-06	6.62742e-05	0.0347805
Bra011366	Sec23/Sec24 protein transport family protein	1.42363e-06	1.31467e-06	1.32766e-06	2.06531e-05	2.96726e-05	2.2181e-05	9.85418e-07	2.32906e-05	1.18455e-06	0.0348222
Bra028345	S-adenosyl-l-homocysteine (SAH) hydrolase 2	3.20243e-06	2.95732e-06	2.98655e-06	0.00150991	0.00153521	0.00127234	2.21668e-06	0.00136219	0.00170537	0.0349807
Bra035791	trigalactosyldiacylglycerol2	7.99577e-05	5.53784e-05	9.32097e-05	1.44997e-06	1.3888e-06	3.11448e-05	2.76729e-05	3.27027e-05	6.65301e-05	0.0351598
Bra021810	26S proteasome regulatory complex, non-ATPase subcomplex, Rpn2/Psmd1 subunit	1.54699e-06	1.42859e-06	7.21354e-05	0.000112214	0.000128975	9.64123e-05	0.000149913	0.00020247	0.000141592	0.0351791
Bra018420	translation initiation factor 3 subunit H1	0.000230442	8.51218e-05	0.000128945	6.68622e-05	3.20206e-06	3.59043e-06	0.000127607	0.000188501	7.66972e-05	0.0352092
Bra003918	Peroxidase superfamily protein	4.29055e-06	3.96216e-06	0.000160053	0.000342345	0.000238474	0.000233973	0.000326685	0.000245677	0.000464103	0.0354841
Bra027544	tubulin beta chain 4	3.49029e-06	3.22315e-06	3.25501e-06	2.53175e-06	2.42493e-06	0.00261028	0.00190859	0.00199854	0.00261374	0.0358192
Bra002259	Mitochondrial substrate carrier family protein	0.0011394	0.00143984	0.00111852	0.000739485	0.0010416	0.000700757	0.00112075	0.00107919	0.00109775	0.036361
Bra002092	VPS35 homolog A	1.97104e-06	1.82018e-06	1.83817e-06	2.85946e-05	1.36941e-06	7.6775e-05	9.5503e-05	4.83693e-05	4.9201e-05	0.036446
Bra010332	HAD superfamily, subfamily IIIB acid phosphatase	5.90562e-06	5.45362e-06	5.50752e-06	8.56751e-05	0.000205151	4.60066e-06	0.000327024	9.6616e-05	0.000147416	0.0364852
Bra002245	aspartate aminotransferase 2	0.000345151	0.000177074	0.00014306	0.000305998	0.000426309	0.000358511	0.000557455	0.000376444	0.000606286	0.0366077
Bra009101	Chalcone-flavanone isomerase family protein	7.57648e-06	6.99659e-06	7.06575e-06	0.000109915	5.26388e-06	0.000118046	0.000104887	0.000185927	0.000126083	0.0366731
Bra028586	G-box regulating factor 6	0.0032758	0.00281645	0.00289696	0.00237616	0.00286451	0.00255195	0.00242384	0.0019404	0.00239672	0.0370304
Bra024759	glutamine-tRNA ligase, putative / glutaminyl-tRNA synthetase, putative / GlnRS, putative	4.27284e-05	5.91871e-05	5.97722e-05	1.54969e-06	1.48431e-06	3.32868e-05	4.43641e-05	8.73796e-05	5.33293e-05	0.0371172
Bra006208	magnesium-chelatase subunit chlH, chloroplast, putative / Mg-protoporphyrin IX chelatase, putative (CHLH)	8.9909e-05	0.000124541	3.14431e-05	8.15215e-07	7.80821e-07	7.87972e-05	7.77924e-07	9.1932e-07	9.35128e-07	0.0374498
Bra008723	voltage dependent anion channel 3	0.00073157	0.000831479	0.000682254	0.000775577	0.000625562	0.000789114	0.000895909	0.000920652	0.00103013	0.0374649
Bra018019	AMP-dependent synthetase and ligase family protein	3.02175e-06	2.79047e-06	2.81805e-06	0.000219188	0.000146958	2.35404e-06	0.000230078	9.88716e-05	0.000226286	0.0375022
Bra010169	non-intrinsic ABC protein 6	3.25614e-06	3.00692e-06	9.10993e-05	2.3619e-06	2.26225e-06	2.53663e-06	4.50772e-05	5.32704e-05	8.12797e-05	0.0379194
Bra023072	Enolase	0.00206391	0.00171212	0.00169642	0.0023852	0.00213875	0.00234364	0.00227609	0.0021175	0.00267784	0.0380234
Bra007025	actin 3	4.11984e-06	3.80451e-06	3.84212e-06	2.9884e-06	0.00080145	0.000577707	0.000655891	0.000404403	0.000822714	0.0380382
Bra035349	2-phosphoglycolate phosphatase 1	0.000995073	0.000998817	0.00141217	0.00122391	0.00102198	0.00111223	0.000748671	0.000813969	0.000863965	0.0381548
Bra034763	Amino acid dehydrogenase family protein	0.0002606	0.000144393	0.000243033	0.00030245	0.000470746	0.000487238	0.000360769	0.000341074	0.000303571	0.0382234
Bra032004	UDP-GLUCOSE PYROPHOSPHORYLASE 1	0.000715751	0.000793162	0.000667502	0.000856652	0.00101942	0.000920027	0.00118904	0.000848951	0.00131021	0.03823
Bra027485	Lactate/malate dehydrogenase family protein	0.00149704	0.00172807	0.00139612	0.00210394	0.00211269	0.00174936	0.0020077	0.00176033	0.00206308	0.0382437
Bra027582	2-oxoglutarate dehydrogenase, E1 component	1.52422e-06	1.40756e-06	1.42147e-06	0.000110562	7.41282e-05	8.31189e-05	1.05505e-06	1.24681e-06	0.00010146	0.0383139
Bra020541	TRAF-like family protein	4.42501e-06	4.08633e-06	4.12672e-06	0.000353074	0.000368921	0.00031025	0.000459441	3.61966e-06	0.000441828	0.0383191
Bra041120	ATP synthase subunit alpha	0.00147922	0.00176442	0.00175312	0.00214596	0.00244081	0.0019446	0.00166383	0.00194104	0.00176928	0.0385137
Bra005019	rubisco activase	0.0066378	0.00670347	0.00841642	0.00609565	0.00604293	0.00782026	0.0044588	0.00569719	0.00497894	0.0385432
Bra023417	unknown protein;	0.000934243	0.000733327	0.000718794	0.000830147	0.000892485	0.00109171	0.00134184	0.00106989	0.00108829	0.0389559
Bra014562	ketol-acid reductoisomerase	2.63698e-06	0.000852301	2.45922e-06	0.000401684	0.00045802	0.000472486	1.82528e-06	2.15705e-06	2.19414e-06	0.0391346
Bra002918	homolog of bacterial cytokinesis Z-ring protein FTSZ 1-1	0.000151161	0.000209387	0.000176214	2.74119e-06	2.62554e-06	0.000235518	2.61579e-06	3.09124e-06	3.1444e-06	0.0393242
Bra027030	Glycosyl hydrolases family 32 protein	2.37489e-06	2.19312e-06	2.2148e-06	5.16802e-05	1.64999e-06	1.85011e-06	4.93161e-05	3.88532e-05	5.9282e-05	0.0397041
Bra007655	rotamase CYP 4	0.00265914	0.00251142	0.00264897	0.0030248	0.00344303	0.00306025	0.00351392	0.00286728	0.00296687	0.0397535
Bra000875	glutathione S-transferase F3	7.29192e-06	6.73381e-06	6.80037e-06	0.000105787	0.000354632	0.000170419	5.04738e-06	5.96479e-06	0.000182021	0.0399008
Bra012747	alpha/beta-Hydrolases superfamily protein	9.4132e-05	4.34637e-06	4.38933e-06	0.000136561	0.000130799	7.33318e-05	0.00022805	0.000154	0.00019581	0.0400616
Bra010347	Enoyl-CoA hydratase/isomerase family	2.11605e-06	1.95409e-06	1.9734e-06	0.000107444	8.82094e-05	9.8908e-05	0.000161117	0.000103856	1.76069e-06	0.0401392
Bra008831	Aldolase-type TIM barrel family protein	0.0001769	0.000228704	6.59899e-05	0.000384952	0.00034413	0.000551241	0.000269385	0.000463052	0.000500453	0.040164
Bra010350	Photosystem I reaction centre subunit IV / PsaE protein	0.00434456	0.00361083	0.00425427	0.00338776	0.00249022	0.00245379	0.00323279	0.00382038	0.00442832	0.0402819
Bra038162	20S proteasome beta subunit G1	0.000316975	0.0004098	0.000413851	0.000413863	0.000704715	0.000493867	0.000614338	0.000726	0.000580237	0.0404644
Bra031675	ATP binding;leucine-tRNA ligases;aminoacyl-tRNA ligases;nucleotide binding;ATP binding;aminoacyl-tRNA ligases	0.000241844	0.000285371	0.000238072	0.000224156	0.000233368	0.00027214	0.000186002	0.00021981	0.000178872	0.0405275
Bra028278	phosphoglucomutase	0.000296786	0.000433945	0.000461299	0.000574078	0.000498308	0.000539479	0.000393744	0.000343925	0.000288103	0.040597
Bra010751	phytoene desaturase 3	0.000167308	0.000180253	0.00015603	0.000101134	0.000135613	0.000130338	0.000173713	0.000136858	0.000162413	0.0406197
Bra000947	unknown protein;	0.00189412	0.00218644	0.00141315	0.00109915	0.000986977	0.00125424	0.00137664	0.00123951	0.00173364	0.0408867
Bra010528	phosphoserine aminotransferase	0.000286961	0.000298123	0.000267617	0.000130096	0.000199371	0.000223552	0.000248289	0.000264076	0.00032831	0.0412889
Bra003597	nudix hydrolase homolog 3	0.000102452	7.56887e-05	5.73276e-05	0.000104042	0.000227777	9.57763e-05	0.000226932	0.000150851	0.000238692	0.0415827
Bra010097	aldehyde dehydrogenase 12A1	2.83945e-06	5.24425e-05	2.64804e-06	6.17895e-05	5.91825e-05	6.63606e-05	9.82716e-05	6.96801e-05	0.00011813	0.0418286
Bra001444	LYR family of Fe/S cluster biogenesis protein	0.000467121	0.000647053	0.000326724	0.000847088	0.00048681	0.000363902	8.08339e-06	9.55263e-06	0.000291507	0.042255
Bra017633	Cyclase family protein	5.99683e-06	5.53784e-06	0.000111852	0.000130497	0.000166656	0.000140151	0.000166037	0.000147162	0.000349283	0.0428197
Bra001747	D-3-phosphoglycerate dehydrogenase	0.000211677	0.000244344	0.000172732	0.000153544	0.000183832	0.000123677	0.00010989	2.16439e-06	2.20161e-06	0.0429189
Bra021412	Ribonuclease E inhibitor RraA/Dimethylmenaquinone methyltransferase	9.3565e-06	8.64037e-06	8.72577e-06	0.000203607	0.000130011	7.289e-06	0.000129529	0.000153072	0.000155704	0.0429441
Bra003231	alpha-soluble NSF attachment protein 2	0.000322459	0.000347409	0.000150361	0.000116951	0.000149356	0.000125603	0.000260403	0.000263772	0.000491897	0.042963
Bra016989	Uroporphyrinogen decarboxylase	0.000477901	0.000698762	0.000519967	0.000288879	0.000221353	0.000465375	0.000248098	0.000162885	0.000331371	0.0430145
Bra018372	thiaminC	0.00024043	0.000222028	6.72668e-05	1.74401e-06	0.000133634	0.000318414	1.66423e-06	1.96672e-06	2.00054e-06	0.043084
Bra039513	NAD(P)-binding Rossmann-fold superfamily protein	5.92816e-06	5.47443e-06	0.000165856	0.000129003	8.23737e-05	9.23645e-05	4.1034e-06	4.84924e-06	4.93262e-06	0.043456
Bra015665	PDI-like 1-2	0.000335657	0.000225431	0.000256116	0.000332012	0.000657209	0.000380346	0.000675892	0.000424332	0.000660138	0.0434628
Bra035416	pyruvate dehydrogenase complex E1 alpha subunit	0.00015971	0.000221229	0.000223416	0.000231697	0.000332883	0.000311047	0.000276373	0.000293946	0.000299001	0.0434938
Bra003176	Ribosomal protein L17 family protein	0.00037336	0.000275827	0.000208915	0.000162494	0.000103759	0.000174516	0.000206748	0.00036649	0.00031066	0.0437466
Bra016084	PATELLIN 1	0.000779373	0.00077113	0.000882585	0.000545142	0.000580159	0.00062884	0.000597273	0.000546452	0.000787452	0.0439656
Bra000808	AAA-type ATPase family protein	2.17532e-06	2.00883e-06	4.05736e-05	4.73373e-05	6.04535e-05	5.08393e-05	4.51719e-05	7.11765e-05	0.000108601	0.0442529
Bra022161	Mannose-binding lectin superfamily protein	0.00013806	0.000478101	0.000128754	0.000901302	0.000647457	0.000779761	0.00155291	0.0004235	0.000775408	0.0445291
Bra016238	Thiamin diphosphate-binding fold (THDP-binding) superfamily protein	3.88295e-06	3.58575e-06	3.6212e-06	8.44971e-05	5.39547e-05	0.000120997	8.06318e-05	0.00012705	3.23087e-06	0.0447115
Bra027928	Protein of unknown function, DUF538	1.00205e-05	9.25356e-06	9.34502e-06	0.000218057	0.000278476	0.000234189	0.000416164	8.19677e-06	0.000250132	0.0448147
Bra005775	Pyridine nucleotide-disulphide oxidoreductase family protein	0.000107116	6.59449e-05	0.00019979	0.000258995	0.000297681	0.000166893	0.000346006	0.000233655	0.000415928	0.0450491
Bra008152	Pyridine nucleotide-disulphide oxidoreductase family protein	0.00106656	0.00123116	0.000714914	0.000894533	0.000764166	0.00116843	0.00036913	0.000545279	0.000665586	0.0452116
Bra017693	catalase 2	0.000896681	0.00106464	0.000985563	0.0011847	0.00113472	0.0011476	0.00104184	0.000995443	0.00111915	0.0453452
Bra035565	homolog of bacterial cytokinesis Z-ring protein FTSZ 1-1	4.27873e-06	3.95124e-06	3.9903e-06	9.31097e-05	8.91814e-05	3.33326e-06	5.92337e-05	7e-05	0.000106806	0.0456452
Bra039666	Class I glutamine amidotransferase-like superfamily protein	7.90422e-05	3.64962e-06	3.6857e-06	0.000143337	0.000192205	9.23645e-05	0.000300916	6.46565e-05	0.000164421	0.0462146
Bra017231	Enolase	0.0018599	0.00165728	0.00155194	0.00213018	0.00194963	0.00213525	0.00214567	0.00184169	0.00233491	0.0470429
Bra009713	LOCATED IN: mitochondrion, chloroplast thylakoid membrane, chloroplast, plastid, chloroplast envelope; EXPRESSED IN: 24 plant structures; EXPRESSED DURING: 14 growth stages; CONTAINS InterPro DOMAIN/s: S-layer homology domain (InterPro:IPR001119); BEST Arabidopsis thaliana protein match is: unknown protein (TAIR:AT5G52410.2); Has 1807 Blast hits to 1807 proteins in 277 species: Archae - 0; Bacter…	3.333e-05	7.69475e-05	3.10832e-05	1.20883e-06	1.15783e-06	2.59651e-05	2.30706e-05	6.81599e-05	5.54655e-05	0.0472028
Bra000974	plasma membrane intrinsic protein 1;4	0.00113253	0.00124505	0.00150883	0.00078238	0.000412154	0.000882273	0.00134386	0.00101464	0.00103208	0.0474627
Bra037675	HARMLESS TO OZONE LAYER 1	0.000274899	0.000190394	0.000192276	0.000249254	0.000429728	0.000267693	0.000428134	0.000337301	0.000400284	0.0475386
Bra017055	rubisco activase	0.00844957	0.00812663	0.0109862	0.00691744	0.00682046	0.0093138	0.0054604	0.00676835	0.00609708	0.0475535
Bra000294	Phosphoenolpyruvate carboxylase family protein	6.49866e-05	3.00063e-06	3.03029e-06	7.07088e-05	4.51504e-05	7.59398e-05	0.000134949	7.97385e-05	0.000216292	0.0476575
Bra022920	2-oxoglutarate (2OG) and Fe(II)-dependent oxygenase superfamily protein	8.19619e-05	0.000113533	0.000267529	0.00032699	0.000142361	0.000191553	2.83665e-06	3.35224e-06	0.000102297	0.0480112
Bra018695	cell wall / vacuolar inhibitor of fructosidase 1	9.70737e-06	8.96439e-06	9.05299e-06	0.000422485	0.000472104	7.56234e-06	0.000268773	0.000317625	0.000323087	0.0481362
Bra012077	gamma carbonic anhydrase 3	0.000122781	0.000113384	0.000114504	8.90615e-05	4.2652e-06	4.78251e-06	0.000127481	0.000100435	0.000153243	0.0482423
Bra010243	N-terminal nucleophile aminohydrolases (Ntn hydrolases) superfamily protein	0.00046662	0.000492464	0.000372999	0.000241766	0.000370505	0.000311581	0.000461413	0.000872446	0.00049919	0.0489196
Bra037859	stromal ascorbate peroxidase	0.000350012	0.000323223	0.000326418	0.000349096	0.000455956	0.000340838	0.000302843	0.000214732	0.000145617	0.0492127
Bra001661	S-adenosylmethionine synthetase family protein	0.000790422	0.000693428	0.000552854	0.000458678	0.000933568	0.00083128	2.7356e-06	0.000420267	3.28841e-06	0.0493959
Bra023598	nitrilase 2	0.00081271	0.00100068	0.00105267	0.00121178	0.00210173	0.00147729	0.00218769	0.00125573	0.00191598	0.0495208
Bra012157	Subtilase family protein	6.13097e-05	9.4362e-05	3.81179e-05	7.41202e-05	8.51917e-05	9.55243e-05	0.000155605	0.000150454	0.000102027	0.0495316
