# Supplementary material for: Shotgun Quantitative Proteomic Analysis of Proteins Responding to Drought Stress in Brassica rapa L. (Inbred Line “Chiifu”)
Source: Int J Genomics. 2016 Jun 21;2016:4235808. doi: 10.1155/2016/4235808 (PMC4932182; doi:10.1155/2016/4235808)
Supplement: Supplementary file 1 — Supplementary table 1. List of total 3,009 identified non-redundant proteins. Supplementary table 2. List of identified non-redundant proteins from each sample. Supplementary table 3. Relative expression amount of the 1,567 proteins among the treatments and replications. Supplementary table 4. Relative amount of 440 differentially expressed proteins. Supplementary table 5. Average of relative amount of proteins in each groups. Supplementary table 6. Enriched GO terms of proteins in each groups. [file 4235808.f1.zip › sup.table S5.xlsx]

## Sheet: Sheet3
		Supplementary table 5. Average of relative amount of proteins in each groups
	Accession	Description	0hr	24hr	48hr
group1	Bra002710	xylose isomerase family protein	3.0999e-06	3.92141e-05	0.000118081
	Bra013210	AMP-dependent synthetase and ligase family protein	2.05084e-06	4.89179e-05	0.000174265
	Bra039540	pyruvate orthophosphate dikinase	1.68989e-06	2.74326e-05	8.23252e-05
	Bra040870	Senescence/dehydration-associated protein-related	3.25694e-06	0.000107376	0.000363181
	Bra016382	UDP-glucosyl transferase 85A2	3.08053e-06	7.74278e-05	0.000310779
	Bra007417	citrate synthase 2	2.91648e-06	4.62483e-05	0.000142367
	Bra001931	glutathione-disulfide reductase	0.000305507	0.000408243	0.00052181
	Bra006975	glutamate-ammonia ligases;catalytics;glutamate-ammonia ligases	1.74575e-06	2.2271e-05	5.72678e-05
	Bra007856	DNA repair ATPase-related	3.23556e-06	3.30594e-05	9.06157e-05
	Bra000460	glutathione S-transferase phi 8	0.00178283	0.00217522	0.00258996
	Bra020793	long-chain acyl-CoA synthetase 6	2.3508e-06	3.72781e-05	0.000100825
	Bra036764	annexin 1	0.000872932	0.00174478	0.00359782
	Bra034402	annexin 1	0.00115399	0.00200326	0.00361941
	Bra005677	ferretin 1	5.35744e-06	8.13788e-05	0.000359492
	Bra030906	aldehyde dehydrogenase 7B4	2.93384e-06	0.00010386	0.000463326
	Bra024346	annexin 2	4.67928e-06	5.96948e-05	0.000264041
	Bra027469	thioredoxin 3	0.00216802	0.00329272	0.00519463
	Bra018338	ubiquitin-activating enzyme 1	0.00016567	0.000201537	0.000249316
	Bra017143	Neutral/alkaline non-lysosomal ceramidase	1.97154e-06	2.01442e-05	4.18936e-05
	Bra016330	aldehyde dehydrogenase 2B7	0.000274792	0.000381937	0.00048514
	Bra011568	rotamase cyclophilin 5	0.00124087	0.0015314	0.00179255
	Bra031804	unknown protein;	7.2483e-06	0.000110877	0.000245048
	Bra016931	Embryo-specific protein 3, (ATS3)	8.08007e-06	0.000102214	0.000198794
	Bra002092	VPS35 homolog A	1.87646e-06	3.55797e-05	6.43578e-05
	Bra011722	methyl esterase 9	5.75351e-06	0.000173221	0.00047537
	Bra003597	nudix hydrolase homolog 3	7.84896e-05	0.000142532	0.000205492
	Bra007179	delta 1-pyrroline-5-carboxylate synthase 2	2.03391e-06	0.000213153	0.000454497
	Bra004771	chitinase, putative	5.24345e-06	0.000400776	0.00069227
	Bra019940	Glutathione S-transferase family protein	6.51389e-06	6.65557e-05	0.000106841
	Bra002245	aspartate aminotransferase 2	0.000221762	0.000363606	0.000513395
	Bra038162	20S proteasome beta subunit G1	0.000380209	0.000537482	0.000640192
	Bra016372	RAB GTPase homolog G3B	4.23683e-06	8.95031e-05	0.000169581
	Bra009101	Chalcone-flavanone isomerase family protein	7.21294e-06	7.77417e-05	0.000138965
	Bra000853	GTP binding Elongation factor Tu family protein	0.000371254	0.000467328	0.00055009
	Bra010332	HAD superfamily, subfamily IIIB acid phosphatase	5.62225e-06	9.84756e-05	0.000190352
	Bra032004	UDP-GLUCOSE PYROPHOSPHORYLASE 1	0.000725471	0.000932033	0.00111607
	Bra037675	HARMLESS TO OZONE LAYER 1	0.00021919	0.000315558	0.000388573
	Bra040093	acyl-CoA oxidase 1	5.96063e-05	0.0001411	0.000215991
	Bra018019	AMP-dependent synthetase and ligase family protein	2.87676e-06	0.000122834	0.000185079
	Bra015665	PDI-like 1-2	0.000272401	0.000456522	0.000586787
	Bra007025	actin 3	3.92216e-06	0.000460715	0.00062767
	Bra010728	rotamase CYP 1	0.000743613	0.00148705	0.00196819
	Bra021412	Ribonuclease E inhibitor RraA/Dimethylmenaquinone methyltransferase	8.90755e-06	0.000113636	0.000146102
	Bra040547	CONTAINS InterPro DOMAIN/s: Mediator complex subunit Med28 (InterPro:IPR021640); BEST Arabidopsis thaliana protein match is: unknown protein (TAIR:AT3G01670.1); Has 122 Blast hits to 112 proteins in 13 species: Archae - 0; Bacteria - 0; Metazoa - 0; Fungi - 0; Plants - 122; Viruses - 0; Other Eukaryotes - 0 (source: NCBI BLink).	0.00011412	0.000168885	0.000204749
	Bra005775	Pyridine nucleotide-disulphide oxidoreductase family protein	0.000124284	0.00024119	0.000331863
	Bra011412	aminopeptidase M1	0.000258633	0.000406604	0.000504661
	Bra035565	homolog of bacterial cytokinesis Z-ring protein FTSZ 1-1	4.07342e-06	6.18748e-05	7.86797e-05
	Bra008737	formate dehydrogenase	2.75067e-05	0.000126108	0.00032758
	Bra000294	Phosphoenolpyruvate carboxylase family protein	2.36725e-05	6.3933e-05	0.00014366
	Bra018695	cell wall / vacuolar inhibitor of fructosidase 1	9.24158e-06	0.000300717	0.000303161
	Bra022356	actin 2	0.00143257	0.00167717	0.00171186
	Bra007610	Tyrosine transaminase family protein	0.000488916	0.000814149	0.000877204
	Bra025649	avirulence induced gene 2 like protein	1.04869e-05	0.000323274	0.00042488
	Bra021810	26S proteasome regulatory complex, non-ATPase subcomplex, Rpn2/Psmd1 subunit	2.5037e-05	0.000112534	0.000164658
	Bra023072	Enolase	0.00182415	0.0022892	0.00235714
	Bra026341	early nodulin-like protein 2	4.50809e-06	0.000193801	0.000320049
	Bra016002	kunitz trypsin inhibitor 1	6.90959e-06	0.000351167	0.000577822
	Bra030569	Lactate/malate dehydrogenase family protein	0.00160069	0.00195879	0.00201817
	Bra019044	early nodulin-like protein 2	2.07385e-06	5.35627e-05	9.18915e-05
	Bra017633	Cyclase family protein	4.11288e-05	0.000145768	0.000220827
	Bra022440	Glycosyl hydrolase family protein	1.91784e-06	5.3067e-05	7.6857e-05
	Bra021322	lipoxygenase 1	1.72538e-06	5.2957e-05	8.32093e-05
	Bra034219	two-pore channel 1	2.05084e-06	6.89796e-05	0.000108947
	Bra000808	AAA-type ATPase family protein	1.49193e-05	5.28767e-05	7.4983e-05
	Bra031205	Adenine nucleotide alpha hydrolases-like superfamily protein	7.86518e-06	0.000218474	0.000238948
	Bra000895	secretion-associated RAS super family 2	0.000203361	0.00132628	0.00152652
	Bra002289	sucrose phosphate synthase 1F	1.41905e-06	4.05216e-05	4.78009e-05
	Bra002485	aleurain-like protease	2.94222e-05	0.000242043	0.000276784
	Bra020813	Tyrosine transaminase family protein	0.000728141	0.00124431	0.00126595
	Bra022161	Mannose-binding lectin superfamily protein	0.000248305	0.000776173	0.000917273
	Bra039666	Class I glutamine amidotransferase-like superfamily protein	2.87925e-05	0.000142636	0.000176664
	Bra026004	SOUL heme-binding family protein	0.00021273	0.000378051	0.000401
	Bra003918	Peroxidase superfamily protein	5.61019e-05	0.000271597	0.000345488
	Bra023545	NAD(P)-binding Rossmann-fold superfamily protein	5.45628e-06	0.000137704	0.000162824
	Bra021477	Insulinase (Peptidase family M16) protein	0.000232032	0.000453624	0.000483767
	Bra017231	Enolase	0.00168971	0.00207168	0.00210742
	Bra025920	ketose-bisphosphate aldolase class-II family protein	1.10347e-06	1.97961e-05	4.46532e-05
	Bra021847	Caleosin-related family protein	4.45705e-05	0.000173679	0.000337144
	Bra005153	Bifunctional inhibitor/lipid-transfer protein/seed storage 2S albumin superfamily protein	1.28579e-05	0.000581615	0.00125404
	Bra012747	alpha/beta-Hydrolases superfamily protein	3.42892e-05	0.000113564	0.00019262
	Bra040903	TRAF-like family protein	0.000234076	0.00044687	0.000495314
	Bra006965	Pyruvate kinase family protein	0.000298813	0.000497434	0.000557197
	Bra010097	aldehyde dehydrogenase 12A1	1.931e-05	6.24442e-05	9.53607e-05
	Bra005012	delta1-pyrroline-5-carboxylate synthase 1	2.06228e-06	0.00053793	0.00118596
	Bra027049	ACC oxidase 2	4.62079e-06	0.000117113	0.000232236
	Bra025749	dehydroascorbate reductase	0.000465357	0.00103859	0.00123737
	Bra030768	Protein of unknown function, DUF538	8.74943e-06	0.000307825	0.000620298
	Bra016810	Glycine cleavage T-protein family	0.00155081	0.0018973	0.00199153
	Bra023598	nitrilase 2	0.000955353	0.00159693	0.00178646
	Bra016357	Phosphoglucomutase/phosphomannomutase family protein	0.000557901	0.00056336	0.000826543
	Bra004531	cellular apoptosis susceptibility protein, putative / importin-alpha re-exporter, putative	3.57882e-05	3.51771e-05	5.80067e-05
	Bra018700	mitochondrial lipoamide dehydrogenase 1	0.000621015	0.000622324	0.000860123
	Bra002483	GTP binding Elongation factor Tu family protein	0.00351983	0.00351087	0.00452883
	Bra027756	P-loop containing nucleoside triphosphate hydrolases superfamily protein	1.77937e-06	1.37012e-06	0.00016836
	Bra006067	Zincin-like metalloproteases family protein	2.12756e-06	1.63822e-06	0.000204949
	Bra003256	dicarboxylate diiron protein, putative (Crd1)	3.61529e-06	2.78378e-06	0.000286136
	Bra024444	voltage dependent anion channel 2	5.35744e-06	4.12524e-06	0.000415756
	Bra017819	cytochrome P450, family 81, subfamily D, polypeptide 8	2.96918e-06	2.28628e-06	0.000235071
	Bra033545	Papain family cysteine protease	4.01808e-06	3.09393e-06	0.000196142
	Bra039029	NADP-malic enzyme 1	2.54064e-06	1.9563e-06	0.000181676
	Bra034344	Calcium-dependent phosphotriesterase superfamily protein	3.99636e-06	3.0772e-06	0.000278438
	Bra033604	Glucose-1-phosphate adenylyltransferase family protein	2.82725e-06	2.17699e-06	0.00017068
	Bra017469	Thiolase family protein	3.42281e-06	2.63557e-06	0.00023194
	Bra017233	ENTH/VHS family protein	1.11765e-06	8.60594e-07	0.000216835
	Bra016644	heat shock protein 70B	2.27485e-06	1.75164e-06	0.00108668
	Bra017730	phospholipase D delta	6.43252e-05	7.42197e-05	0.000214299
	Bra000115	hydroxyproline-rich glycoprotein family protein	4.53575e-06	3.49253e-06	7.43955e-05
	Bra002840	LORELEI-LIKE-GPI-ANCHORED PROTEIN 1	1.92033e-05	1.47866e-05	0.000314973
	Bra014904	HISTIDINE TRIAD NUCLEOTIDE-BINDING 2	8.08007e-06	6.22167e-06	0.00013253
	Bra004054	UDP-Glycosyltransferase / trehalose-phosphatase family protein	1.71339e-06	1.31931e-06	2.8103e-05
	Bra000035	vacuoleless1 (VCL1)	1.80324e-06	1.38849e-06	2.95767e-05
	Bra028547	P-loop containing nucleoside triphosphate hydrolases superfamily protein	3.01151e-06	2.31887e-06	5.66936e-05
	Bra021273	B-cell receptor-associated 31-like	1.14624e-05	8.82609e-06	0.000220837
	Bra015607	Serine protease inhibitor (SERPIN) family protein	3.77207e-06	2.9045e-06	8.18152e-05
	Bra000913	tolB protein-related	2.27485e-06	1.75164e-06	5.60803e-05
	Bra003601	Protein kinase superfamily protein	1.28133e-06	9.86625e-07	3.51944e-05
	Bra019384	Uncharacterised protein family (UPF0041)	1.36912e-05	1.05423e-05	0.000442423
	Bra017684	subtilisin-like serine protease 2	1.92784e-06	1.48444e-06	6.3146e-05
	Bra029121	CAP160 protein	2.24378e-06	1.72772e-06	8.1241e-05
	Bra008723	voltage dependent anion channel 3	0.000748434	0.000730084	0.000948898
	Bra004031	alpha-xylosidase 1	5.83567e-05	6.94386e-05	0.000154471
	Bra011422	lysine-ketoglutarate reductase/saccharopine dehydrogenase bifunctional enzyme	1.41363e-06	1.86808e-05	0.000165002
	Bra009790	Transducin/WD40 repeat-like superfamily protein	1.12445e-06	6.06299e-06	3.68866e-05
	Bra001972	cold, circadian rhythm, and RNA binding 1	9.01618e-06	5.04505e-05	0.000317619
	Bra013997	glycine-rich RNA-binding protein 2	0.000236925	0.000260372	0.000388445
	Bra033708	translocase of outer membrane 22-V	1.52438e-05	8.52977e-05	0.000375045
	Bra025066	Proteasome component (PCI) domain protein	3.83071e-06	2.14349e-05	9.44358e-05
	Bra016163	Cupredoxin superfamily protein	2.74333e-06	1.47919e-05	7.15909e-05
	Bra004627	S-formylglutathione hydrolase	5.22492e-06	5.96051e-05	0.000310309
	Bra024568	Phosphoglucomutase/phosphomannomutase family protein	0.000575063	0.000637009	0.000881368
	Bra036321	Cysteine proteinases superfamily protein	4.13032e-06	4.23654e-05	0.000229326
	Bra014955	uricase / urate oxidase / nodulin 35, putative	4.86399e-06	3.80586e-05	0.000185038
	Bra028271	2 iron, 2 sulfur cluster binding	1.36912e-05	7.66099e-05	0.000303664
	Bra003537	D-isomer specific 2-hydroxyacid dehydrogenase family protein	4.72413e-06	2.54723e-05	0.000102465
	Bra004970	Eukaryotic translation initiation factor 2 subunit 1	4.32355e-06	2.41926e-05	9.5894e-05
	Bra030494	Late embryogenesis abundant protein	9.7924e-06	0.000278627	0.00116601
	Bra034975	aldehyde oxidase 2	1.18863e-06	1.2192e-05	4.12904e-05
	Bra022221	Late embryogenesis abundant protein (LEA) family protein	4.96192e-06	7.81731e-05	0.000275373
	Bra013540	oxidoreductase, zinc-binding dehydrogenase family protein	4.5497e-06	4.66671e-05	0.000149473
	Bra022449	eukaryotic initiation factor 4A-III	3.62415e-06	6.36219e-05	0.000264302
	Bra037976	Dihydrolipoamide acetyltransferase, long form protein	2.73318e-06	2.80347e-05	0.000106924
	Bra028628	mitochondrial HSO70 2	2.17449e-06	7.2917e-05	0.000365548
	Bra033856	pinoresinol reductase 1	4.66452e-06	3.79473e-05	0.000126296
	Bra038946	purple acid phosphatase 26	3.08053e-06	1.66101e-05	5.79928e-05
	Bra030114	unknown protein;	7.90724e-06	4.42453e-05	0.000148859
	Bra016041	cinnamyl-alcohol dehydrogenase	4.17699e-06	2.25221e-05	7.86343e-05
	Bra021175	nitrile specifier protein 1	5.70908e-06	3.19455e-05	0.000109992
	Bra028568	Eukaryotic aspartyl protease family protein	3.0999e-06	2.52187e-05	9.12928e-05
	Bra006103	aspartate aminotransferase 3	3.27136e-06	5.98473e-05	0.00028422
	Bra011843	alanine:glyoxylate aminotransferase 2	3.10641e-06	3.54375e-05	0.000132171
	Bra001123	pathogenesis-related 4	6.90959e-06	5.40646e-05	0.000186743
	Bra039059	Peroxidase superfamily protein	4.53575e-06	2.538e-05	7.43955e-05
	Bra015164	unknown protein;	1.19246e-05	6.67248e-05	0.000195588
	Bra027544	tubulin beta chain 4	3.32282e-06	0.000871746	0.00217362
	Bra010574	aminopeptidase P1	2.3104e-06	4.0559e-05	0.000120303
	Bra039681	glyoxalase II 3	6.06005e-06	0.000110865	0.000342253
	Bra027030	Glycosyl hydrolases family 32 protein	2.26094e-06	1.83934e-05	4.91504e-05
	Bra024417	2-oxoglutarate dehydrogenase, E1 component	0.000102421	0.000127491	0.000198983
	Bra016405	PDI-like 1-1	0.000236715	0.000295674	0.000450203
	Bra038734	heat shock protein 70	0.00166824	0.00191352	0.00233903
	Bra035074	vacuolar ATP synthase subunit A	0.00165119	0.00187138	0.00222971
	Bra019845	aconitase 3	0.000258478	0.000302385	0.000378492
	Bra014308	myrosinase-binding protein 2	0.000148271	0.000233806	0.000423715
	Bra023417	unknown protein;	0.000795455	0.000938112	0.00116668
	Bra012157	Subtilase family protein	6.45965e-05	8.49454e-05	0.000136029
	Bra003155	Ribosomal protein L36e family protein	0.000176217	1.01658e-05	0.000363279
	Bra010167	Single hybrid motif superfamily protein	0.000387206	0.000228388	0.000528144
	Bra015047	Heat shock protein 70 (Hsp 70) family protein	0.000779269	1.70956e-06	0.00152038
	Bra009040	RAB GTPase homolog A4A	0.000228999	5.10568e-06	0.000342016
	Bra016269	senescence associated gene 24	0.000506155	9.56778e-06	0.000737962
	Bra015995	sucrose synthase 6	2.71226e-05	1.20739e-06	3.93463e-05
	Bra013145	ARM repeat superfamily protein	3.46725e-05	1.34741e-06	4.72073e-05
	Bra029730	Rhodanese/Cell cycle control phosphatase superfamily protein	0.000259591	1.17378e-05	0.000360864
	Bra006584	TCP-1/cpn60 chaperonin family protein	0.000244525	1.52215e-06	0.000275212
	Bra003231	alpha-soluble NSF attachment protein 2	0.00027341	0.000130637	0.00033869
	Bra040749	Granulin repeat cysteine protease family protein	0.000601137	0.00048789	0.000756289
	Bra014179	RAB GTPase homolog G3E	0.000469893	0.00039665	0.000607785
	Bra014466	SEC7-like guanine nucleotide exchange family protein	5.97092e-06	6.43621e-07	1.371e-05
	Bra029574	root FNR 1	2.81808e-05	3.01208e-06	6.41612e-05
	Bra027184	Isochorismatase family protein	7.89827e-05	5.80901e-06	0.000189304
	Bra006138	Nitrilase/cyanide hydratase and apolipoprotein N-acyltransferase family protein	0.000216376	0.00017616	0.000286206
	Bra000737	vacuolar ATP synthase subunit E1	0.000697352	0.000625014	0.000806108
	Bra010169	non-intrinsic ABC protein 6	3.24541e-05	2.38693e-06	5.98758e-05
	Bra031790	aspartic proteinase A1	3.99423e-05	1.85133e-06	0.000196532
	Bra021327	thylakoid lumen 18.3 kDa protein	0.00194458	0.00152953	0.0023622
	Bra034800	Adenine nucleotide alpha hydrolases-like superfamily protein	0.000101997	5.69283e-06	0.000342255
	Bra010243	N-terminal nucleophile aminohydrolases (Ntn hydrolases) superfamily protein	0.000444028	0.000307951	0.000611016
	Bra004214	Glyoxalase/Bleomycin resistance protein/Dioxygenase superfamily protein	0.000561662	0.000523676	0.000696686
	Bra038797	tripeptidyl peptidase ii	1.17723e-05	8.65829e-07	9.81068e-05
	Bra021863	NAD(P)-binding Rossmann-fold superfamily protein	3.31849e-05	3.54693e-06	0.00019802
	Bra028411	alpha/beta-Hydrolases superfamily protein	2.87026e-05	3.09393e-06	0.000141152
	Bra033349	Protein of unknown function, DUF538	6.36299e-05	6.85883e-06	0.000244665
	Bra037484	Lactoylglutathione lyase / glyoxalase I family protein	9.99558e-05	6.9004e-06	0.000337413
	Bra012899	methyl esterase 10	4.31887e-05	4.34567e-06	0.000136089
	Bra016261	SPFH/Band 7/PHB domain-containing membrane-associated protein family	7.57692e-05	3.981e-06	0.000239594
	Bra006794	Ubiquitin-like superfamily protein	0.000121672	1.22426e-05	0.000344855
	Bra041132	Kunitz family trypsin and protease inhibitor protein	5.09705e-05	5.12867e-06	0.000144795
group2	Bra026426	Aldolase superfamily protein	0.00207904	0.00163454	0.00157635
	Bra024101	H(+)-ATPase 2	0.000706534	1.25808e-06	1.33994e-06
	Bra011869	cold, circadian rhythm, and RNA binding 1	0.000727461	7.02818e-06	7.48547e-06
	Bra013385	RNAse l inhibitor protein 2	0.000170441	1.95967e-06	2.08717e-06
	Bra031031	methylthioalkylmalate synthase-like 4	0.000267925	1.81589e-06	1.93404e-06
	Bra017018	Eukaryotic translation initiation factor 2 subunit 1	6.89349e-05	2.654e-06	2.82668e-06
	Bra006391	PHYTOENE SYNTHASE	7.14325e-05	2.75016e-06	2.9291e-06
	Bra039315	signal recognition particle receptor protein, chloroplast (FTSY)	0.000109061	3.61449e-06	3.84967e-06
	Bra024300	Phosphoglycerate mutase family protein	0.000134919	3.88589e-06	4.13872e-06
	Bra022262	unknown protein;	0.000210273	6.0562e-06	6.45024e-06
	Bra012095	Protein phosphatase 2C family protein	9.66536e-05	2.78378e-06	2.9649e-06
	Bra006196	Auxin-responsive GH3 family protein	7.25051e-05	1.87573e-06	1.99777e-06
	Bra037580	Eukaryotic aspartyl protease family protein	0.000100066	2.28169e-06	2.43015e-06
	Bra005640	ACT domain-containing small subunit of acetolactate synthase protein	0.000111569	2.56434e-06	2.73118e-06
	Bra003428	N-terminal nucleophile aminohydrolases (Ntn hydrolases) superfamily protein	0.00024692	5.10568e-06	5.43787e-06
	Bra004639	NADPH-dependent thioredoxin reductase C	0.000273204	0.000167316	0.000163067
	Bra001085	polyribonucleotide nucleotidyltransferase, putative	0.000197419	3.20898e-05	1.31666e-06
	Bra030537	photosystem II family protein	0.000313772	6.99378e-05	7.05027e-06
	Bra007002	chloroplast RNA-binding protein 29	0.000302903	2.56157e-05	3.75432e-06
	Bra040136	unknown protein;	0.000157674	1.98685e-05	2.73735e-06
	Bra018329	catalytics;transferases;[acyl-carrier-protein] S-malonyltransferases;binding	0.000538723	0.000366305	0.000326632
	Bra005141	acetyl Co-enzyme a carboxylase carboxyltransferase alpha subunit	0.000314233	0.000203288	0.000148663
	Bra028406	Ribulose bisphosphate carboxylase (small chain) family protein	0.0203245	0.0162831	0.0139717
	Bra037640	chloroplast chaperonin 10	0.00134852	0.00103583	0.000877093
	Bra039844	nitrite reductase 1	0.000711729	0.000566172	0.000472935
	Bra006248	Ribosomal protein S13/S18 family	0.000990447	0.000696635	0.000573172
	Bra025431	Ribulose bisphosphate carboxylase (small chain) family protein	0.00996609	0.00850112	0.00781922
	Bra002918	homolog of bacterial cytokinesis Z-ring protein FTSZ 1-1	0.000178921	8.02949e-05	2.95048e-06
	Bra006208	magnesium-chelatase subunit chlH, chloroplast, putative / Mg-protoporphyrin IX chelatase, putative (CHLH)	8.19645e-05	2.67977e-05	8.77457e-07
	Bra015656	nitrate reductase 1	6.0247e-05	1.89531e-05	1.36252e-06
	Bra016989	Uroporphyrinogen decarboxylase	0.000565543	0.000325202	0.000247451
	Bra000144	rubisco activase	0.00955851	0.00813194	0.00638752
	Bra016353	glutamate:glyoxylate aminotransferase	0.00235764	0.00201316	0.00153517
	Bra002922	microtubule-associated proteins 65-1	7.57476e-05	3.97713e-05	2.0729e-06
	Bra033287	RNA-binding (RRM/RBD/RNP motifs) family protein	0.000461833	0.000314411	0.000167419
	Bra021277	receptor-like kinase 902	7.01145e-05	3.79803e-05	1.91874e-06
	Bra026349	protochlorophyllide oxidoreductase B	0.00121727	0.000539211	0.000137609
	Bra037182	ferredoxin-NADP(+)-oxidoreductase 1	0.00229634	0.00204845	0.00167101
	Bra009349	unknown protein;	0.000139867	7.90854e-05	3.45483e-06
	Bra029906	chlorsulfuron/imidazolinone resistant 1	9.85105e-05	6.04283e-05	1.85989e-06
	Bra028181	Ribulose bisphosphate carboxylase (small chain) family protein	0.0327284	0.0275768	0.0229211
	Bra003345	ketol-acid reductoisomerase	0.000936421	0.000657845	0.000443539
	Bra011081	Class II aminoacyl-tRNA and biotin synthetases superfamily protein	0.000502549	0.000305126	0.000188292
	Bra037389	thylakoid rhodanese-like	0.000591878	0.000440224	0.00033211
	Bra014005	Inositol monophosphatase family protein	0.000789645	0.000672763	0.000572087
	Bra033478	Rubredoxin-like superfamily protein	0.000554352	0.000386618	0.000276157
	Bra028586	G-box regulating factor 6	0.0029964	0.00259754	0.00225365
	Bra028922	TCP-1/cpn60 chaperonin family protein	0.00167824	0.00139351	0.0011015
	Bra017055	rubisco activase	0.00918747	0.0076839	0.00610861
	Bra024580	glutamate:glyoxylate aminotransferase	0.00217214	0.00196279	0.00143983
	Bra005019	rubisco activase	0.00725256	0.00665295	0.00504497
	Bra028459	unknown protein;	5.90881e-05	1.28392e-05	4.52142e-07
	Bra002468	4-hydroxy-3-methylbut-2-enyl diphosphate synthase	0.000568107	0.000429867	0.000210303
	Bra037536	presequence protease 1	0.000386954	0.000347495	0.000267317
	Bra010696	Ribosomal protein S25 family protein	0.00122854	0.000991656	0.000560736
	Bra000097	histone H2A 11	0.000366721	0.000313027	0.000207735
	Bra018372	thiaminC	0.000176575	0.000151264	1.87716e-06
	Bra008811	elongation factor family protein	0.000146924	9.83153e-05	1.79918e-06
	Bra016270	Aldolase superfamily protein	0.00041816	0.000366013	0.000177508
	Bra011329	ATPase, F0 complex, subunit B/B', bacterial/chloroplast	0.00213673	0.00201102	0.00124696
	Bra040427	ribosome recycling factor, chloroplast precursor	0.000561513	0.000497084	0.000266801
	Bra011919	chaperonin 60 beta	0.0027648	0.00259932	0.00200252
	Bra031675	ATP binding;leucine-tRNA ligases;aminoacyl-tRNA ligases;nucleotide binding;ATP binding;aminoacyl-tRNA ligases	0.000255096	0.000243221	0.000194894
	Bra031219	copper ion binding;cobalt ion binding;zinc ion binding	0.000264552	0.000219068	5.01093e-06
	Bra018565	chloroplast RNA binding	0.003142	0.00311311	0.00245575
	Bra040448	Ribosomal protein L1p/L10e family	0.000872694	0.000851548	0.000487661
	Bra035349	2-phosphoglycolate phosphatase 1	0.00113535	0.00111938	0.000808868
	Bra010189	UDP-Glycosyltransferase superfamily protein	0.000268528	0.000198972	1.26491e-05
	Bra030858	chaperonin 60 beta	0.00256687	0.00249743	0.00186855
	Bra001747	D-3-phosphoglycerate dehydrogenase	0.000209584	0.000153684	3.80854e-05
	Bra007284	dicarboxylate diiron protein, putative (Crd1)	0.000387899	0.00027495	1.4488e-06
	Bra027017	unknown protein;	0.000292815	0.000242399	3.92337e-05
	Bra023485	carbonic anhydrase 2	0.00545301	0.00539418	0.00447686
	Bra020043	Translation elongation factor EF1B/ribosomal protein S6 family protein	0.000395649	0.000304852	5.9974e-05
	Bra008152	Pyridine nucleotide-disulphide oxidoreductase family protein	0.00100421	0.000942376	0.000526665
	Bra009483	glutamate synthase 1	0.0011003	0.00113598	0.000756187
	Bra007041	high cyclic electron flow 1	0.00180431	0.00184155	0.00126327
	Bra029563	photosystem II subunit Q-2	0.00408932	0.00436133	0.00254255
	Bra004055	hydroxypyruvate reductase	0.00209645	0.00217445	0.00148432
	Bra022920	2-oxoglutarate (2OG) and Fe(II)-dependent oxygenase superfamily protein	0.000154341	0.000220301	3.61618e-05
	Bra019170	Double Clp-N motif protein	0.000249798	0.000332737	5.1602e-06
	Bra032344	carbamoyl phosphate synthetase B	0.000217399	0.000227323	0.000107763
	Bra001444	LYR family of Fe/S cluster biogenesis protein	0.0004803	0.000565933	0.000103048
	Bra039342	phosphoglycerate kinase 1	0.00520709	0.00523382	0.00419501
	Bra004940	Remorin family protein	0.000410213	0.000458765	6.31586e-06
	Bra028015	unknown protein;	0.00028393	0.000303954	8.78729e-06
	Bra034363	60S acidic ribosomal protein family	0.00174174	0.00170271	0.000883171
	Bra001661	S-adenosylmethionine synthetase family protein	0.000678901	0.000741175	0.000142097
	Bra019788	Nucleic acid-binding, OB-fold-like protein	6.12446e-05	1.55968e-06	1.84851e-05
	Bra021555	Aldolase-type TIM barrel family protein	0.00343367	3.28117e-06	0.00100783
	Bra038863	photosystem II subunit O-2	0.00654899	0.00451344	0.00517408
	Bra037892	Molybdenum cofactor sulfurase family protein	0.000109908	3.63759e-06	4.3787e-05
	Bra010280	Uncharacterised BCR, YbaB family COG0718	0.000698915	0.000496868	0.000573241
	Bra025219	glyceraldehyde 3-phosphate dehydrogenase A subunit	0.00483227	0.00414029	0.00442049
	Bra039301	plasma membrane intrinsic protein 1B	0.0010192	0.000613062	0.000757194
	Bra037380	unknown protein;	0.00221894	0.00129364	0.00161709
	Bra008533	unknown protein;	0.00192169	0.00121432	0.00145758
	Bra005347	Single hybrid motif superfamily protein	0.000209339	6.85883e-06	9.1499e-05
	Bra006164	Protein of unknown function (DUF3411)	0.000313067	3.01208e-06	5.81062e-05
	Bra014973	Nucleic acid-binding proteins superfamily	0.000116248	2.98054e-06	2.42386e-05
	Bra027196	MAR binding filament-like protein 1	0.000123771	1.58134e-06	1.28599e-05
	Bra037714	Ribosomal L38e protein family	0.00165015	0.000768891	0.00092961
	Bra016084	PATELLIN 1	0.000811029	0.000584714	0.000643725
	Bra006963	Thioredoxin superfamily protein	0.00217463	0.00132435	0.00184882
	Bra028288	GroES-like zinc-binding alcohol dehydrogenase family protein	0.000298277	0.000130365	0.000220643
	Bra035087	photosystem II subunit R	0.00193528	0.00137716	0.00172874
	Bra029928	ribosomal protein S11-beta	0.000650979	7.16079e-06	0.000403614
	Bra037761	photosystem I reaction center subunit PSI-N, chloroplast, putative / PSI-N, putative (PSAN)	0.00376186	0.0024209	0.00311242
	Bra024089	xyloglucan endotransglucosylase/hydrolase 24	0.000706792	0.000393632	0.000516638
	Bra040854	PATELLIN 2	0.000515708	0.000236979	0.000342397
	Bra011172	H(+)-ATPase 2	0.000917283	0.000615491	0.000737484
	Bra011839	FK506-binding protein 16-2	0.000493387	0.000207547	0.000324336
	Bra000947	unknown protein;	0.00183124	0.00111346	0.00144993
	Bra002259	Mitochondrial substrate carrier family protein	0.00123258	0.00082728	0.00109923
	Bra040651	Cystatin/monellin superfamily protein	0.00066606	0.000309148	0.000585046
	Bra010350	Photosystem I reaction centre subunit IV / PsaE protein	0.00406989	0.00277726	0.00382717
	Bra035791	trigalactosyldiacylglycerol2	7.6182e-05	1.13278e-05	4.23019e-05
	Bra010751	phytoene desaturase 3	0.000167864	0.000122362	0.000157662
	Bra000974	plasma membrane intrinsic protein 1;4	0.00129547	0.000692269	0.00113019
group3	Bra032118	Cytosol aminopeptidase family protein	0.00116457	0.00169363	0.00144954
	Bra006429	Cobalamin-independent synthase family protein	0.00235942	0.00347542	0.00293415
	Bra000592	Leucine-rich repeat protein kinase family protein	1.79014e-06	4.62351e-05	1.96204e-05
	Bra030945	phosphoenolpyruvate carboxylase 1	0.000342823	0.000495398	0.000431188
	Bra023645	Cobalamin-independent synthase family protein	0.00242612	0.00351681	0.00303565
	Bra010320	Alkaline-phosphatase-like family protein	3.29321e-06	9.24485e-05	5.20572e-05
	Bra028243	HIS HF	2.52761e-06	5.8388e-05	4.1193e-05
	Bra014468	N-terminal nucleophile aminohydrolases (Ntn hydrolases) superfamily protein	6.63073e-06	0.000422092	0.000281753
	Bra028345	S-adenosyl-l-homocysteine (SAH) hydrolase 2	3.04877e-06	0.00143915	0.00102326
	Bra007994	HISTIDINE BIOSYNTHESIS 6B	2.72312e-06	0.00012391	7.49304e-05
	Bra028615	actin 7	0.00188083	0.00237042	0.00230498
	Bra011079	regulatory particle AAA-ATPase 2A	0.000176682	0.000369637	0.000333138
	Bra023707	Aluminium induced protein with YGL and LRDR motifs	8.80151e-06	0.000408284	0.000301435
	Bra004475	ADP-ribosylation factor A1E	0.00190537	0.00297696	0.00286026
	Bra039747	thioredoxin-dependent peroxidase 1	0.000488333	0.000971459	0.000885295
	Bra007655	rotamase CYP 4	0.00260651	0.00317602	0.00311602
	Bra009023	Glycosyl hydrolase family protein	1.86699e-06	6.2245e-05	5.05503e-05
	Bra032750	S-adenosyl-L-homocysteine hydrolase	0.00117035	0.00180629	0.00174073
	Bra027485	Lactate/malate dehydrogenase family protein	0.00154041	0.00198866	0.00194371
	Bra014002	S-adenosyl-L-homocysteine hydrolase	0.0011873	0.00172299	0.00168996
	Bra008831	Aldolase-type TIM barrel family protein	0.000157198	0.000426775	0.000410964
	Bra020470	vegetative storage protein 2	0.000166823	0.000583969	0.000568237
	Bra024809	ssDNA-binding transcriptional regulator	5.66534e-06	0.000173428	0.000169341
	Bra027209	phospholipase D alpha 1	0.000201236	0.000295184	0.000296022
	Bra015314	Lactate/malate dehydrogenase family protein	0.0015839	0.00199213	0.00199669
	Bra022325	Eukaryotic aspartyl protease family protein	3.01151e-06	0.00023011	0.000250294
	Bra006775	regulatory particle triple-A ATPase 3	4.21809e-05	0.000252164	0.00026459
	Bra035416	pyruvate dehydrogenase complex E1 alpha subunit	0.000201452	0.000291876	0.000289773
	Bra027376	Subtilase family protein	7.57695e-05	0.000156759	0.000136212
	Bra000667	isoamylase 3	6.20953e-05	0.000126893	0.000106936
	Bra007317	eukaryotic translation initiation factor 3E	0.000144959	0.000238538	0.000216697
	Bra008402	proteasome subunit PAB1	0.000229856	0.000433008	0.000361214
	Bra023623	phosphoglucosamine mutase family protein	5.23417e-05	0.000133362	0.000110069
	Bra006954	monodehydroascorbate reductase 1	0.00059962	0.00103996	0.000875354
	Bra013983	Thiamine pyrophosphate dependent pyruvate decarboxylase family protein	0.000112752	0.000216948	0.000174118
	Bra034763	Amino acid dehydrogenase family protein	0.000216009	0.000420145	0.000335138
	Bra020541	TRAF-like family protein	4.21269e-06	0.000344082	0.000301629
	Bra016238	Thiamin diphosphate-binding fold (THDP-binding) superfamily protein	3.69663e-06	8.64831e-05	7.03042e-05
	Bra010347	Enoyl-CoA hydratase/isomerase family	2.01451e-06	9.81871e-05	8.89112e-05
	Bra027928	Protein of unknown function, DUF538	9.5397e-06	0.000243574	0.000224831
	Bra032110	aldehyde dehydrogenase 11A3	0.000384963	0.00085744	0.000500353
	Bra007034	uracil phosphoribosyltransferase	5.08128e-06	0.00015446	2.75655e-05
	Bra031652	amidase 1	3.51224e-06	7.2589e-05	1.90536e-05
	Bra036452	CLIP-associated protein	1.02827e-06	3.94783e-05	9.38397e-06
	Bra024440	ADP-ribosylation factor-like A1D	8.03616e-06	0.000335194	7.44855e-05
	Bra034107	P-loop containing nucleoside triphosphate hydrolases superfamily protein	0.000118518	0.000297395	0.000144355
	Bra000311	Chitinase family protein	5.51736e-06	0.000152667	2.99312e-05
	Bra015025	beta-amylase 1	2.59413e-06	6.72783e-05	1.64869e-05
	Bra015274	FASCICLIN-like arabinoogalactan 9	5.91461e-06	0.000196558	6.07553e-05
	Bra015779	Dehydrin family protein	7.58284e-06	0.00039027	0.000134355
	Bra027582	2-oxoglutarate dehydrogenase, E1 component	1.45108e-06	8.92697e-05	3.45873e-05
	Bra011366	Sec23/Sec24 protein transport family protein	1.35532e-06	2.41689e-05	8.48684e-06
	Bra041120	ATP synthase subunit alpha	0.00166559	0.00217712	0.00179139
	Bra000875	glutathione S-transferase F3	6.94203e-06	0.000210279	6.43443e-05
	Bra002116	Cobalamin-independent synthase family protein	0.00246237	0.00364674	0.00294049
	Bra017940	DPP6 N-terminal domain-like protein	9.13059e-05	0.000203553	0.000130674
	Bra020587	seryl-tRNA synthetase / serine--tRNA ligase	0.000184463	0.000375692	0.000248332
	Bra029879	manganese superoxide dismutase 1	0.000596796	0.000849014	0.00069827
	Bra017693	catalase 2	0.000982293	0.00115567	0.00105214
	Bra009660	lysm domain GPI-anchored protein 2 precursor	4.08468e-06	8.39822e-05	3.34985e-06
	Bra012557	|	2.46032e-06	5.05849e-05	2.01771e-06
	Bra007758	unknown protein;	6.42893e-06	0.000149197	5.27237e-06
	Bra022867	ACT domain-containing small subunit of acetolactate synthase protein	3.16628e-06	8.11829e-05	2.59667e-06
	Bra016524	CONTAINS InterPro DOMAIN/s: Protein of unknown function DUF985 (InterPro:IPR009327), RmlC-like jelly roll fold (InterPro:IPR014710); Has 1465 Blast hits to 1465 proteins in 584 species: Archae - 10; Bacteria - 1038; Metazoa - 19; Fungi - 43; Plants - 51; Viruses - 0; Other Eukaryotes - 304 (source: NCBI BLink).	7.86518e-06	0.000198498	6.45024e-06
	Bra004323	Ribosomal protein PSRP-3/Ycf65	8.80151e-06	0.00026849	7.21813e-06
	Bra009706	ribosomal protein S11-beta	9.2997e-06	0.000360783	7.6267e-06
	Bra013576	Peroxidase superfamily protein	4.46723e-06	0.000218454	3.66358e-06
	Bra012203	ferredoxin-NADP(+)-oxidoreductase 2	4.02903e-06	0.00209613	3.30421e-06
	Bra019953	acetyl Co-enzyme a carboxylase biotin carboxylase subunit	2.9514e-06	0.000849146	2.42045e-06
	Bra011830	myo-inositol-1-phosphate synthase 1	2.89932e-06	0.000485833	2.37774e-06
	Bra008463	isopropylmalate dehydrogenase 2	0.000558076	0.000936905	0.000557868
	Bra004244	Zincin-like metalloproteases family protein	9.2388e-05	0.000138075	7.90985e-05
	Bra022964	Apoptosis inhibitory protein 5 (API5)	1.91698e-05	0.000136246	2.20081e-06
	Bra009397	peroxisomal NAD-malate dehydrogenase 2	0.00159064	0.00202679	0.00142458
	Bra028278	phosphoglucomutase	0.000397343	0.000537288	0.000341924
	Bra002904	SHV3-like 1	0.000149228	0.000209765	0.000123256
	Bra002617	LOCATED IN: thylakoid, chloroplast thylakoid membrane, chloroplast, chloroplast envelope; EXPRESSED IN: 22 plant structures; EXPRESSED DURING: 13 growth stages; CONTAINS InterPro DOMAIN/s: Thylakoid soluble phosphoprotein TSP9 (InterPro:IPR021584); Has 37 Blast hits to 37 proteins in 10 species: Archae - 0; Bacteria - 0; Metazoa - 0; Fungi - 0; Plants - 37; Viruses - 0; Other Eukaryotes - 0 (sour…	0.000293927	0.00075074	1.20064e-05
	Bra013632	HSP70-interacting protein 1	4.04233e-05	0.000110166	2.97217e-06
	Bra002878	FASCICLIN-like arabinogalactan 1	0.000194956	0.00035015	0.000133917
	Bra016184	phosphoglucomutase, putative / glucose phosphomutase, putative	2.50303e-05	9.26099e-05	1.97822e-06
	Bra016010	basic transcription factor 3	6.36299e-05	0.000229107	7.3051e-06
	Bra020134	TCP-1/cpn60 chaperonin family protein	0.000134646	0.000434949	2.39181e-06
	Bra025480	6-phosphogluconate dehydrogenase family protein	8.70206e-05	0.000268466	2.49003e-06
	Bra000687	ATP synthase delta-subunit gene	0.00268869	0.00337952	0.00238585
	Bra035836	glutamate-1-semialdehyde-2,1-aminomutase	0.00120626	0.00143474	0.00106506
	Bra013517	photosystem II subunit QA	0.00239344	0.0034059	0.00183879
	Bra023165	myo-inositol monophosphatase like 1	0.000171833	0.000298322	0.000121215
	Bra014562	ketol-acid reductoisomerase	0.000285799	0.000444063	2.05882e-06
	Bra028624	peroxisomal NAD-malate dehydrogenase 2	0.00198087	0.00252656	0.00166027
	Bra036365	Thioredoxin superfamily protein	0.00221361	0.00277792	0.00187109
	Bra039513	NAD(P)-binding Rossmann-fold superfamily protein	5.90863e-05	0.000101247	4.62842e-06
	Bra017436	ARM repeat superfamily protein	4.68039e-05	6.20472e-05	3.30421e-05
	Bra007885	SPFH/Band 7/PHB domain-containing membrane-associated protein family	0.000102801	0.000237611	4.2549e-06
	Bra039757	O-Glycosyl hydrolases family 17 protein	6.01141e-05	0.000119302	2.40128e-06
	Bra013859	acyl carrier protein 4	0.000314328	0.000630991	9.54839e-06
	Bra034394	copper/zinc superoxide dismutase 2	9.85476e-05	0.000217328	5.85819e-06
	Bra004781	O-acetylserine (thiol) lyase B	0.00159489	0.00180425	0.00119748
	Bra040080	serine hydroxymethyltransferase 3	5.76459e-05	7.9518e-05	2.29234e-06
	Bra037682	O-acetylserine (thiol) lyase B	0.00201612	0.00225511	0.00157077
	Bra009998	unknown protein;	0.000179302	0.000259265	9.77114e-05
	Bra038377	ATP synthase delta-subunit gene	0.00231761	0.00254784	0.00193368
	Bra007085	tryptophan synthase alpha chain	0.000382301	0.000525122	0.000112553
	Bra008643	Ribosomal protein S7e family protein	0.000505669	0.000500624	6.38235e-06
	Bra019494	LOCATED IN: thylakoid, chloroplast thylakoid membrane, chloroplast, chloroplast envelope; EXPRESSED IN: 22 plant structures; EXPRESSED DURING: 13 growth stages; CONTAINS InterPro DOMAIN/s: Thylakoid soluble phosphoprotein TSP9 (InterPro:IPR021584); Has 37 Blast hits to 37 proteins in 10 species: Archae - 0; Bacteria - 0; Metazoa - 0; Fungi - 0; Plants - 37; Viruses - 0; Other Eukaryotes - 0 (sour…	0.000520122	0.00123816	1.17733e-05
	Bra001470	phosphoglycerate kinase 1	0.00471505	0.00499462	0.00377577
	Bra011689	alpha/beta-Hydrolases superfamily protein	0.000104436	9.15736e-05	3.25106e-06
	Bra011449	3-deoxy-d-arabino-heptulosonate 7-phosphate synthase	0.000274717	0.000349633	0.000133886
	Bra037859	stromal ascorbate peroxidase	0.000333218	0.000381963	0.000221064
group4	Bra011664	Ribosomal protein L2 family	0.000992288	0.000603885	0.00109269
	Bra027521	HAD superfamily, subfamily IIIB acid phosphatase	0.000236657	3.04187e-05	0.000435711
	Bra033851	Protein of unknown function (DUF760)	0.000122663	2.19495e-05	0.000110219
	Bra018420	translation initiation factor 3 subunit H1	0.000148169	2.45516e-05	0.000130935
	Bra010528	phosphoserine aminotransferase	0.000284234	0.000184339	0.000280225
	Bra016748	eukaryotic release factor 1-2	7.90835e-05	2.61739e-06	0.00012474
	Bra033657	Granulin repeat cysteine protease family protein	0.000503059	0.000387599	0.000516457
	Bra040977	photosystem II reaction center protein B	0.00220577	0.00177394	0.00224683
	Bra011099	profilin 1	0.00101623	0.000669059	0.00104505
	Bra016481	ferredoxin-NADP(+)-oxidoreductase 2	0.00201598	3.12793e-06	0.00206778
	Bra009713	LOCATED IN: mitochondrion, chloroplast thylakoid membrane, chloroplast, plastid, chloroplast envelope; EXPRESSED IN: 24 plant structures; EXPRESSED DURING: 14 growth stages; CONTAINS InterPro DOMAIN/s: S-layer homology domain (InterPro:IPR001119); BEST Arabidopsis thaliana protein match is: unknown protein (TAIR:AT5G52410.2); Has 1807 Blast hits to 1807 proteins in 277 species: Archae - 0; Bacter…	4.71203e-05	9.44392e-06	4.88987e-05
	Bra024759	glutamine-tRNA ligase, putative / glutaminyl-tRNA synthetase, putative / GlnRS, putative	5.38959e-05	1.21069e-05	6.1691e-05
	Bra020105	Myosin family protein with Dil domain	2.90192e-05	5.22124e-06	3.17654e-05
	Bra003176	Ribosomal protein L17 family protein	0.000286034	0.000146923	0.000294633
	Bra000998	glucuronokinase G	8.21474e-05	3.16268e-06	8.92899e-05
	Bra012077	gamma carbonic anhydrase 3	0.00011689	3.27031e-05	0.000127053
